# Supplementary material for: Synthesis of unstrained Criegee intermediates: inverse α-effect and other protective stereoelectronic forces can stop Baeyer–Villiger rearrangement of γ-hydroperoxy-γ-peroxylactones
Source: PubMed Central journal article supplement — Chem Sci. 2020 May 6;11(20):5313–22. doi: 10.1039/d0sc01025a (PMC8159355; doi:10.1039/d0sc01025a), 2020-05-06

## Supporting Information

### Part 1

#### Synthesis of unstrained Criegee intermediates: inverse $\alpha$ -effect and other protective stereoelectronic forces can stop Baeyer-Villiger rearrangement of $\gamma$ -hydroperoxy- $\gamma$ -peroxylactones

Vera A. Vil',<sup>[a]</sup> Yana A. Barsegyan,<sup>[a]</sup> Leah Kuhn,<sup>[b]</sup> Maria V. Ekimova,<sup>[a],[c]</sup> Egor A. Semenov,<sup>[a],[c]</sup>  
Alexander A. Korlyukov,<sup>[d],[e]</sup> Alexander O. Terent'ev, \*<sup>[a],[c]</sup> Igor Alabugin \*<sup>[b]</sup>

[a] N. D. Zelinsky Institute of Organic Chemistry Russian Academy of Sciences, 47 Leninsky Prospect, Moscow, 119991, Russian Federation.

[b] Department of Chemistry and Biochemistry Florida State University, Tallahassee, 32309, USA.

[c] D. I. Mendeleev University of Chemical Technology of Russia, 9 Miusskaya Square, Moscow 125047, Russian Federation.

[d] A. N. Nesmeyanov Institute of Organoelement Compounds Russian Academy of Sciences, 28 Vavilov Street, Moscow, 119991, Russian Federation.

[e] Pirogov Russian National Research Medical University, Moscow, 117997, Russian Federation.

#### Table of content

|                                                                                            |     |
|--------------------------------------------------------------------------------------------|-----|
| General materials and methods .....                                                        | S2  |
| Synthesis of starting $\gamma$ -ketoesters <b>1</b> .....                                  | S2  |
| Characterization data of starting $\gamma$ -ketoesters <b>1</b> .....                      | S3  |
| Experimental procedure for Table 1. ....                                                   | S8  |
| General experimental procedure for Scheme 5. ....                                          | S9  |
| Characterization data of synthesized $\gamma$ -hydroperoxy- $\gamma$ -peroxylactones ..... | S9  |
| General experimental procedure for Scheme 7. ....                                          | S19 |
| Experimental procedures for Scheme 8. ....                                                 | S20 |
| Computational Details .....                                                                | S23 |
| X-ray studies.....                                                                         | S63 |
| References .....                                                                           | S65 |
| NMR of starting $\gamma$ -ketoesters <b>1</b> .....                                        | S66 |
| HRMS of starting $\gamma$ -ketoesters <b>1</b> .....                                       | S96 |

## General materials and methods

**Caution: Although we have encountered no difficulties in working with peroxides, precautions such as the performance of reactions within a fume hood and behind a safety shield should be taken. The use of redox-active transition-metal salts, heating and vigorous shaking should be avoided!**

NMR spectra were recorded on commercial instrument (300.13 MHz for  $^1\text{H}$ , 75.48 MHz for  $^{13}\text{C}$ ) in  $\text{CDCl}_3$  at 25 °C. High resolution mass spectra (HRMS) were measured using electrospray ionization (ESI-TOF).<sup>1</sup> The measurements were done in a positive ion mode (interface capillary voltage – 4500 V); mass range from  $m/z$  50 to  $m/z$  3000 Da; external/internal calibration was done with Electrospray Calibrant Solution. A syringe injection was used for solutions in MeCN (flow rate 3  $\mu\text{L}/\text{min}$ ). Nitrogen was applied as a dry gas; interface temperature was set at 180 °C.

The TLC analysis was carried out on standard silica gel chromatography plates. The melting points were determined on a Kofler hot-stage apparatus. Chromatography was performed on silica gel (40-60  $\mu\text{m}$ ).

Ethyl levulinate **1m**,  $\text{H}_2\text{O}_2$  (35% solution in water),  $\text{BF}_3 \cdot \text{Et}_2\text{O}$ ,  $\text{HClO}_4$  (70% solution in water),  $\text{HBF}_4$  (48% solution in water),  $\text{NaHCO}_3$ , phosphomolybdic acid hydrate (formula weight: 1,825.25 g/mol),  $\text{SnCl}_4$  were purchased from commercial sources and were used as is. All solvents were distilled before use using standard procedures.

A solution of  $\text{H}_2\text{O}_2$  in  $\text{Et}_2\text{O}$  (4.30 mol/L,  $\approx$  20 % weight) was prepared by the extraction with  $\text{Et}_2\text{O}$  (5  $\times$  100 mL) from a 35% aqueous solution (100 mL) followed by drying over  $\text{MgSO}_4$  and evaporating of approximately 2/3 volume of the solution.<sup>2,3</sup>

## Synthesis of starting $\gamma$ -ketoesters **1**

### General procedure for synthesis of $\gamma$ -ketoesters 1a-j. (GP1)

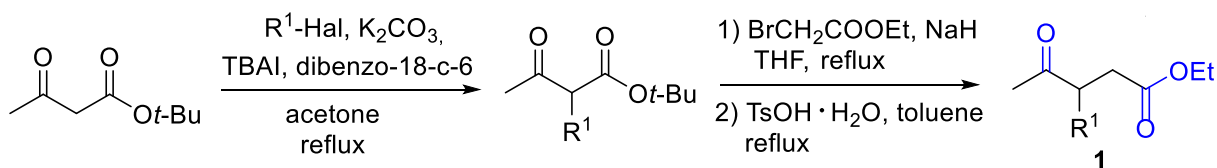

*Tert*-butyl 3-oxobutanoate (2.37 g, 15.0 mmol, 1.3 eq.) was added dropwise to a suspension of  $\text{K}_2\text{CO}_3$  (12.42 g, 90.0 mmol, 7.5 eq.) in dry acetone (50 mL). Then corresponding benzyl or alkyl halogenide (12.0 mmol, 1 eq.), TBAI (221.6 mg, 0.6 mmol, 0.05 eq.) and dibenzo-18-crown-6 (216.2 mg, 0.6 mmol, 0.05 eq.) were added. The reaction mixture was refluxed for 10 h. Then solid was filtered and washed acetone (3 $\times$ 10 mL). A filtrate was concentrated under reduced pressure using a rotary evaporator (15-20 mmHg), (bath temperature, ca. 30–35 °C). Later,  $\text{Et}_2\text{O}$  (60 mL) was added and a solution was washed with brine (3 $\times$ 10 mL). The organic layer was dried over  $\text{MgSO}_4$ , filtered and concentrated under reduced pressure using a rotary evaporator (15-20 mmHg), (bath

temperature, ca. 30–35 °C). The respective  $\alpha$ -benzylated or  $\alpha$ -alkylated  $\beta$ -ketoesters were isolated by column chromatography on SiO<sub>2</sub> (PE:EtOAc = from 20:1 to 2:1).

To a suspension of NaH (60% in mineral oil, 220.0 mg, 5.5 mmol, 1.1 eq.) in dry THF (15 mL) was added a solution of  $\alpha$ -benzylated or  $\alpha$ -alkylated  $\beta$ -ketoester from previous stage (5.0 mmol, 1.0 eq.) in THF (10 mL) dropwise over 30 min. The resulted solution was stirred for 1 h before addition of ethyl bromoacetate (918.5 mg, 5.5 mmol, 1.1 eq.) dropwise over 30 min. The addition funnel was replaced with a reflux condenser. The reaction mixture was refluxed for 6 h. After cooling, H<sub>2</sub>O (15 mL) was added and the product from the aqueous layer was extracted with CH<sub>2</sub>Cl<sub>2</sub> (3×20 mL). The combined organic layers were washed with brine (3×10 mL), dried over MgSO<sub>4</sub>, filtered and concentrated under reduced pressure using a rotary evaporator (15-20 mmHg), (bath temperature, ca. 30–35 °C).

A solution of unpurified resulting  $\alpha,\alpha$ -disubstituted  $\beta$ -ketoesters and *p*-toluenesulfonic acid monohydrate (47.6 mg, 0.25 mmol, 0.05 eq.) in toluene (15 mL) was refluxed for 5 h. The reaction mixture was then cooled to room temperature and diluted with Et<sub>2</sub>O (50 mL). The mixture was washed with brine (10 mL), a 5% aqueous NaHCO<sub>3</sub> solution (2×10 mL), and again with brine (10 mL), dried over MgSO<sub>4</sub>, filtered and concentrated under reduced pressure using a rotary evaporator (15-20 mmHg), (bath temperature, ca. 20–25 °C). The respective  $\beta$ -benzylated or  $\beta$ -alkylated  $\gamma$ -ketoesters **1** were isolated by column chromatography on SiO<sub>2</sub> (PE:EtOAc = from 20:1 to 2:1).

### Characterization data of starting $\gamma$ -ketoesters **1**

#### Ethyl 3-benzyl-4-oxopentanoate, **1a** <sup>4</sup>

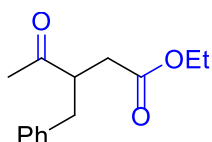

According to **GP1**  $\alpha$ -benzylated  $\beta$ -ketoester (5.0 mmol) given 57% (667.2 mg, 2.85 mmol) **1a**.

Colorless oil.  $R_f$  = 0.37 (PE:EtOAc = 5:1).

<sup>1</sup>H NMR (300.13 MHz, CDCl<sub>3</sub>,  $\delta$ ): 7.33 – 7.10 (m, 5H), 4.05 (q,  $J$  = 7.1 Hz, 2H), 3.34 – 3.17 (m, 1H), 2.90 (dd,  $J$  = 13.5, 7.0 Hz, 1H), 2.73 (dd,  $J$  = 17.0, 10.0 Hz, 1H), 2.59 (dd,  $J$  = 13.5, 8.2 Hz, 1H), 2.31 (dd,  $J$  = 17.0, 4.2 Hz, 1H), 2.10 (s, 3H), 1.20 (t,  $J$  = 7.1 Hz, 3H).

<sup>13</sup>C NMR (75.48 MHz, CDCl<sub>3</sub>,  $\delta$ ): 210.75, 172.27, 138.42, 129.03, 128.77, 126.82, 60.72, 49.78, 37.83, 35.53, 30.41, 14.21.

#### Ethyl 3-(4-nitrobenzyl)-4-oxopentanoate, **1b**

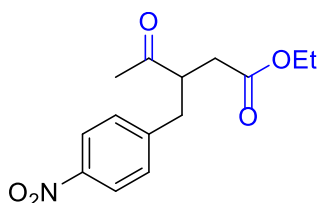

According to **GP1**  $\alpha$ -benzylated  $\beta$ -ketoester (5.0 mmol) given 63% (879.2 mg, 3.15 mmol) **1b**.

Colorless oil.  $R_f = 0.29$  (PE:EtOAc = 5:1).

$^1\text{H}$  NMR (300.13 MHz,  $\text{CDCl}_3$ ,  $\delta$ ): 8.15 (d,  $J = 8.6$  Hz, 2H), 7.33 (d,  $J = 8.6$  Hz, 2H), 4.08 (q,  $J = 7.1$  Hz, 2H), 3.38 – 3.21 (m, 1H), 3.03 (dd,  $J = 13.6, 7.4$  Hz, 1H), 2.81 – 2.64 (m, 2H), 2.32 (dd,  $J = 16.9, 4.9$  Hz, 1H), 2.13 (s, 3H), 1.21 (t,  $J = 7.1$  Hz, 3H).

$^{13}\text{C}$  NMR (75.48 MHz,  $\text{CDCl}_3$ ,  $\delta$ ): 209.58, 171.75, 147.06, 146.34, 130.00, 124.01, 61.04, 49.33, 37.19, 35.58, 30.39, 14.22.

HRMS (ESI)  $m/z$   $[\text{M} + \text{Na}]^+$ . Calcd for  $[\text{C}_{14}\text{H}_{17}\text{NO}_5\text{Na}]^+$ : 302.0999. Found: 302.1000.

### Ethyl 3-(4-chlorobenzyl)-4-oxopentanoate, **1c**

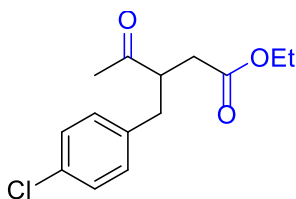

According to **GP1**  $\alpha$ -benzylated  $\beta$ -ketoester (5.0 mmol) given 36% (482.6 mg, 1.80 mmol) **1c**.

Colorless oil.  $R_f = 0.31$  (PE:EtOAc = 2:1).

$^1\text{H}$  NMR (300.13 MHz,  $\text{CDCl}_3$ ,  $\delta$ ): 7.25 (d,  $J = 8.3$  Hz, 2H), 7.08 (d,  $J = 8.3$  Hz, 2H), 4.06 (q,  $J = 7.1$  Hz, 2H), 3.30 – 3.14 (m, 1H), 2.88 (dd,  $J = 13.6, 7.2$  Hz, 1H), 2.71 (dd,  $J = 17.0, 9.7$  Hz, 1H), 2.57 (dd,  $J = 13.6, 7.9$  Hz, 1H), 2.29 (dd,  $J = 17.0, 4.5$  Hz, 1H), 2.11 (s, 3H), 1.20 (t,  $J = 7.1$  Hz, 3H).

$^{13}\text{C}$  NMR (75.48 MHz,  $\text{CDCl}_3$ ,  $\delta$ ): 210.43, 172.11, 136.91, 132.71, 130.40, 128.92, 60.85, 49.63, 37.03, 35.50, 30.50, 14.21.

HRMS (ESI)  $m/z$   $[\text{M} + \text{H}]^+$ . Calcd for  $[\text{C}_{14}\text{H}_{18}\text{ClO}_3]^+$ : 269.0939. Found: 269.0937.

### Ethyl 3-(4-bromobenzyl)-4-oxopentanoate, **1d**

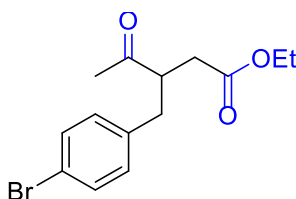

According to **GP1**  $\alpha$ -benzylated  $\beta$ -ketoester (5.0 mmol) given 78% (1216.8 mg, 3.90 mmol) **1d**.

Yellow oil.  $R_f = 0.51$  (PE:EtOAc = 5:1).

$^1\text{H}$  NMR (300.13 MHz,  $\text{CDCl}_3$ ,  $\delta$ ): 7.41 (d,  $J = 8.3$  Hz, 2H), 7.03 (d,  $J = 8.3$  Hz, 2H), 4.07 (q,  $J = 7.1$  Hz, 2H), 3.32 – 3.14 (m, 1H), 2.87 (dd,  $J = 13.6, 7.2$  Hz, 1H), 2.71 (dd,  $J = 17.0, 9.6$  Hz, 1H), 2.56 (dd,  $J = 13.6, 7.9$  Hz, 1H), 2.30 (dd,  $J = 17.0, 4.5$  Hz, 1H), 2.11 (s, 3H), 1.21 (t,  $J = 7.1$  Hz, 3H).

$^{13}\text{C}$  NMR (75.48 MHz,  $\text{CDCl}_3$ ,  $\delta$ ): 210.32, 172.09, 137.46, 131.90, 130.79, 120.76, 60.87, 49.60, 37.11, 35.53, 30.48, 14.24.

HRMS (ESI)  $m/z$   $[\text{M} + \text{H}]^+$ . Calcd for  $[\text{C}_{14}\text{H}_{18}\text{BrO}_3]^+$ : 313.0434, 315.0414. Found: 313.0432, 315.0414.

### Ethyl 3-(4-(*tert*-butyl)benzyl)-4-oxopentanoate, **1e**

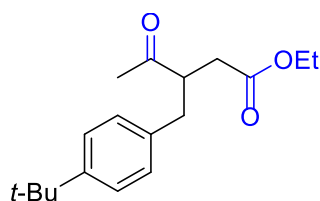

According to **GP1**  $\alpha$ -benzylated  $\beta$ -ketoester (5.0 mmol) given 45% (652.9 mg, 2.25 mmol) **1e**.

Colorless oil.  $R_f = 0.62$  (PE:EtOAc = 2:1).

$^1\text{H}$  NMR (300.13 MHz,  $\text{CDCl}_3$ ,  $\delta$ ): 7.31 (d,  $J = 8.2$  Hz, 2H), 7.08 (d,  $J = 8.2$  Hz, 2H), 4.06 (q,  $J = 7.1$  Hz, 2H), 3.32 – 3.19 (m, 1H), 2.90 (dd,  $J = 13.6, 6.6$  Hz, 1H), 2.73 (dd,  $J = 17.0, 10.1$  Hz, 1H), 2.56 (dd,  $J = 13.6, 8.5$  Hz, 1H), 2.33 (dd,  $J = 17.0, 4.2$  Hz, 1H), 2.14 (s, 3H), 1.30 (s, 9H), 1.21 (t,  $J = 7.1$  Hz, 3H).

$^{13}\text{C}$  NMR (75.48 MHz,  $\text{CDCl}_3$ ,  $\delta$ ): 210.95, 172.43, 149.74, 135.24, 128.72, 125.66, 60.73, 49.79, 37.23, 35.45, 34.54, 31.47, 30.33, 14.24.

HRMS (ESI)  $m/z$   $[\text{M} + \text{Na}]^+$ . Calcd for  $[\text{C}_{18}\text{H}_{26}\text{O}_3\text{Na}]^+$ : 313.1774. Found: 313.1778.

#### Ethyl 3-(4-methylbenzyl)-4-oxopentanoate, **1f**

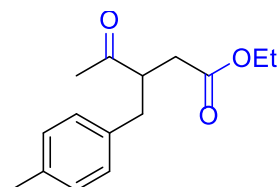

According to **GP1**  $\alpha$ -benzylated  $\beta$ -ketoester (5.0 mmol) given 46% (570.2 mg, 2.30 mmol) **1f**.

Colorless oil.  $R_f = 0.67$  (PE:EtOAc = 5:1).

$^1\text{H}$  NMR (300.13 MHz,  $\text{CDCl}_3$ ,  $\delta$ ): 7.10 (d,  $J = 7.7$  Hz, 2H), 7.04 (d,  $J = 7.7$  Hz, 2H), 4.06 (q,  $J = 7.1$  Hz, 2H), 3.29 – 3.17 (m, 1H), 2.88 (dd,  $J = 13.6, 6.9$  Hz, 1H), 2.73 (dd,  $J = 17.0, 10.1$  Hz, 1H), 2.55 (dd,  $J = 13.6, 8.3$  Hz, 1H), 2.31 (dd,  $J = 17.0, 4.2$  Hz, 1H), 2.31 (s, 3H), 2.12 (s, 3H), 1.21 (t,  $J = 7.1$  Hz, 3H).

$^{13}\text{C}$  NMR (75.48 MHz,  $\text{CDCl}_3$ ,  $\delta$ ): 210.98, 172.39, 136.38, 135.27, 129.45, 128.91, 60.72, 49.86, 37.41, 35.47, 30.46, 21.12, 14.23.

HRMS (ESI)  $m/z$   $[\text{M} + \text{Na}]^+$ . Calcd for  $[\text{C}_{15}\text{H}_{20}\text{O}_3\text{Na}]^+$ : 271.1305. Found: 271.1310.

#### Ethyl 3-(3-methylbenzyl)-4-oxopentanoate, **1g**

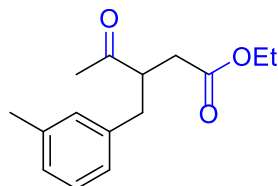

According to **GP1**  $\alpha$ -benzylated  $\beta$ -ketoester (5.0 mmol) given 64% (793.9 mg, 3.20 mmol) **1g**.

Colorless oil.  $R_f = 0.43$  (PE:EtOAc = 5:1).

$^1\text{H}$  NMR (300.13 MHz,  $\text{CDCl}_3$ ,  $\delta$ ): 7.18 (t,  $J = 7.4$  Hz, 1H), 7.03 (d,  $J = 7.4$  Hz, 1H), 6.99 – 6.91 (m, 2H), 4.06 (q,  $J = 7.1$  Hz, 2H), 3.32 – 3.17 (m, 1H), 2.88 (dd,  $J = 13.5, 6.8$  Hz, 1H), 2.74 (dd,  $J = 17.0,$

10.1 Hz, 1H), 2.54 (dd,  $J = 13.5, 8.4$  Hz, 1H), 2.36 – 2.27 (dd,  $J = 17.0, 4.2$  Hz, 1H), 2.33 (s, 3H), 2.12 (s, 3H), 1.21 (t,  $J = 7.1$  Hz, 3H).

$^{13}\text{C}$  NMR (75.48 MHz,  $\text{CDCl}_3$ ,  $\delta$ ): 210.92, 172.39, 138.42, 138.37, 129.81, 128.67, 127.58, 126.07, 60.73, 49.83, 37.77, 35.51, 30.40, 21.46, 14.23.

HRMS (ESI)  $m/z$   $[\text{M} + \text{H}]^+$ . Calcd for  $[\text{C}_{15}\text{H}_{21}\text{O}_3]^+$ : 249.1485. Found: 249.1492.

### Ethyl 3-(3-methoxybenzyl)-4-oxopentanoate, **1h**

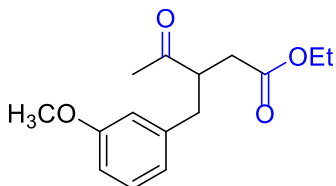

According to **GP1**  $\alpha$ -benzylated  $\beta$ -ketoester (5.0 mmol) given 15% (198.2 mg, 0.75 mmol) **1h**.

Colorless oil.  $R_f = 0.58$  (PE:EtOAc = 5:1).

$^1\text{H}$  NMR (300.13 MHz,  $\text{CDCl}_3$ ,  $\delta$ ): 7.21 (t,  $J = 7.9$  Hz, 1H), 6.86 – 6.60 (m, 3H), 4.07 (q,  $J = 7.1$  Hz, 2H), 3.79 (s, 3H), 3.35 – 3.18 (m, 1H), 2.89 (dd,  $J = 13.5, 6.9$  Hz, 1H), 2.74 (dd,  $J = 17.0, 10.0$  Hz, 1H), 2.56 (dd,  $J = 13.5, 8.3$  Hz, 1H), 2.33 (dd,  $J = 17.0, 4.3$  Hz, 1H), 2.13 (s, 3H), 1.21 (t,  $J = 7.1$  Hz, 3H).

$^{13}\text{C}$  NMR (75.48 MHz,  $\text{CDCl}_3$ ,  $\delta$ ): 210.76, 172.33, 159.98, 140.04, 129.81, 121.41, 114.86, 112.15, 60.77, 55.32, 49.72, 37.88, 35.57, 30.45, 14.25.

HRMS (ESI)  $m/z$   $[\text{M} + \text{Na}]^+$ . Calcd for  $[\text{C}_{15}\text{H}_{20}\text{O}_4\text{Na}]^+$ : 287.1254. Found: 287.1255.

### Ethyl 3-(2-chlorobenzyl)-4-oxopentanoate, **1i**

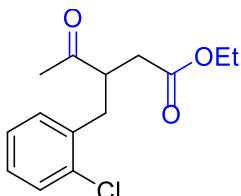

According to **GP1**  $\alpha$ -benzylated  $\beta$ -ketoester (5.0 mmol) given 36% (483.7 mg, 1.80 mmol) **1i**.

Colorless oil.  $R_f = 0.74$  (PE:EtOAc = 5:1).

$^1\text{H}$  NMR (300.13 MHz,  $\text{CDCl}_3$ ,  $\delta$ ): 7.40 – 7.35 (m, 1H), 7.22 – 7.10 (m, 3H), 4.05 (q,  $J = 7.2$  Hz, 2H), 3.48 – 3.31 (m, 1H), 3.05 (dd,  $J = 13.4, 6.3$  Hz, 1H), 2.85 – 2.62 (m, 2H), 2.32 (dd,  $J = 17.0, 4.0$  Hz, 1H), 2.16 (s, 3H), 1.20 (t,  $J = 7.2$  Hz, 3H).

$^{13}\text{C}$  NMR (75.48 MHz,  $\text{CDCl}_3$ ,  $\delta$ ): 210.55, 172.15, 136.16, 134.28, 131.63, 130.01, 128.49, 127.09, 60.78, 47.36, 35.59, 35.39, 30.31, 14.22.

HRMS (ESI)  $m/z$   $[\text{M} + \text{Na}]^+$ . Calcd for  $[\text{C}_{14}\text{H}_{17}\text{O}_3\text{ClNa}]^+$ : 291.0758. Found: 291.0759.

### Ethyl 3-acetylheptanoate, **1j**<sup>5</sup>

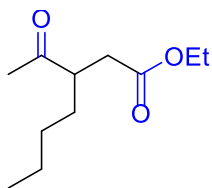

According to **GP1**  $\alpha$ -alkylated  $\beta$ -ketoester (5.0 mmol) given 68% (681.0 mg, 3.40 mmol) **1j**.

Colorless oil.  $R_f = 0.63$  (PE:EtOAc = 2:1).

$^1\text{H NMR}$  (300.13 MHz,  $\text{CDCl}_3$ ,  $\delta$ ): 4.08 (q,  $J = 7.0$  Hz, 2H), 3.06 – 2.86 (m, 1H), 2.71 (dd,  $J = 16.8, 9.8$  Hz, 1H), 2.32 (dd,  $J = 16.8, 4.4$  Hz, 1H), 2.21 (s, 3H), 1.66 – 1.51 (m, 1H), 1.45 – 1.19 (m, 8H), 0.87 (t,  $J = 7.0$  Hz, 3H).

$^{13}\text{C NMR}$  (75.48 MHz,  $\text{CDCl}_3$ ,  $\delta$ ): 210.85, 172.43, 60.50, 47.89, 35.31, 31.01, 29.47, 29.04, 22.65, 14.12, 13.78.

### Ethyl 3-acetylnonanoate, **1k**

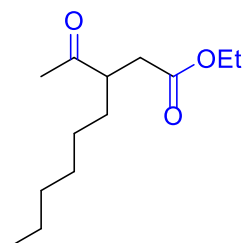

According to **GP1**  $\alpha$ -alkylated  $\beta$ -ketoester (5.0 mmol) given 57% (650.3 mg, 2.85 mmol) **1k**.

Colorless oil.  $R_f = 0.52$  (PE:EtOAc = 2:1).

$^1\text{H NMR}$  (300.13 MHz,  $\text{CDCl}_3$ ,  $\delta$ ): 4.08 (q,  $J = 7.1$  Hz, 2H), 3.02 – 2.88 (m, 1H), 2.71 (dd,  $J = 16.8, 9.8$  Hz, 1H), 2.32 (dd,  $J = 16.8, 4.5$  Hz, 1H), 2.21 (s, 3H), 1.67 – 1.51 (m, 1H), 1.46 – 1.32 (m, 1H), 1.32 – 1.17 (m, 11H), 0.86 (t,  $J = 7.1$  Hz, 3H).

$^{13}\text{C NMR}$  (75.48 MHz,  $\text{CDCl}_3$ ,  $\delta$ ): 211.13, 172.62, 60.67, 48.04, 35.42, 31.67, 31.45, 29.65, 29.37, 26.98, 22.65, 14.26, 14.12.

HRMS (ESI)  $m/z$   $[\text{M} + \text{Na}]^+$ . Calcd for  $[\text{C}_{13}\text{H}_{24}\text{O}_3\text{Na}]^+$ : 251.1618. Found: 251.1625.

### Ethyl 3-acetylundecanoate, **1l**

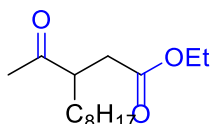

According to **GP1**  $\alpha$ -alkylated  $\beta$ -ketoester (5.0 mmol) given 60% (768.6 mg, 3.00 mmol) **1l**.

Colorless oil.  $R_f = 0.59$  (PE:EtOAc = 5:1).

$^1\text{H NMR}$  (300.13 MHz,  $\text{CDCl}_3$ ,  $\delta$ ): 4.09 (q,  $J = 7.0$  Hz, 2H), 3.07 – 2.87 (m, 1H), 2.71 (dd,  $J = 16.7, 9.8$  Hz, 1H), 2.33 (dd,  $J = 16.7, 4.5$  Hz, 1H), 2.21 (s, 3H), 1.64 – 1.52 (m, 1H), 1.46 – 1.33 (m, 1H), 1.29 – 1.18 (m, 15H), 0.86 (t,  $J = 7.0$  Hz, 3H).

$^{13}\text{C}$  NMR (75.48 MHz,  $\text{CDCl}_3$ ,  $\delta$ ): 211.01, 172.60, 60.67, 48.11, 35.47, 31.94, 31.49, 29.73, 29.60, 29.46, 29.31, 27.04, 22.75, 14.27, 14.17.

HRMS (ESI)  $m/z$   $[\text{M} + \text{Na}]^+$ . Calcd for  $[\text{C}_{15}\text{H}_{28}\text{O}_3\text{Na}]^+$ : 279.1931. Found: 279.1929.

#### Ethyl 2-methyl-4-oxopentanoate, **1n**<sup>6</sup>

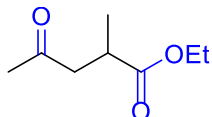

**1n** was prepared according to literature procedure.<sup>6</sup>

$^1\text{H}$  NMR (300.13 MHz,  $\text{CDCl}_3$ ,  $\delta$ ): 4.11 (q,  $J = 7.1$  Hz, 2H), 2.95 – 2.83 (m, 2H), 2.54 – 2.36 (m, 1H), 2.14 (s, 3H), 1.23 (t,  $J = 7.1$  Hz, 3H), 1.16 (d,  $J = 6.6$  Hz, 3H).

$^{13}\text{C}$  NMR (75.48 MHz,  $\text{CDCl}_3$ ,  $\delta$ ): 206.73, 175.83, 60.66, 46.72, 34.89, 30.15, 17.16, 14.24.

#### Ethyl 4-oxooctanoate, **1o**<sup>7</sup>

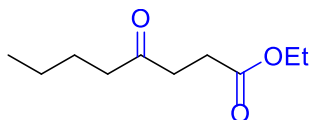

**1o** was prepared according to literature procedure.<sup>7</sup>

$^1\text{H}$  NMR (300.13 MHz,  $\text{CDCl}_3$ ,  $\delta$ ): 4.10 (q,  $J = 7.2$  Hz, 2H), 2.69 (t,  $J = 6.5$  Hz, 2H), 2.54 (t,  $J = 6.5$  Hz, 2H), 2.42 (t,  $J = 7.4$  Hz, 2H), 1.55 (quintet,  $J = 7.4$  Hz, 2H), 1.36 – 1.25 (m, 2H), 1.22 (t,  $J = 7.2$  Hz, 3H), 0.88 (t,  $J = 7.2$  Hz, 3H).

$^{13}\text{C}$  NMR (75.48 MHz,  $\text{CDCl}_3$ ,  $\delta$ ): 209.25, 172.93, 60.66, 42.60, 37.11, 28.10, 26.00, 22.40, 14.25, 13.91.

#### Methyl 4-oxo-4-phenylbutanoate, **1p**<sup>8</sup>

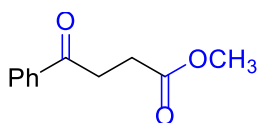

**1p** was prepared according to literature procedure.<sup>9</sup>

$^1\text{H}$  NMR (300.13 MHz,  $\text{CDCl}_3$ ,  $\delta$ ): 7.95 (d,  $J = 7.3$  Hz, 2H), 7.53 (t,  $J = 7.3$  Hz, 1H), 7.43 (t,  $J = 7.3$  Hz, 2H), 3.67 (s, 3H), 3.29 (t,  $J = 6.6$  Hz, 2H), 2.73 (t,  $J = 6.6$  Hz, 2H).

$^{13}\text{C}$  NMR (75.48 MHz,  $\text{CDCl}_3$ ,  $\delta$ ): 197.99, 173.29, 136.51, 133.19, 128.58, 127.99, 51.74, 33.35, 27.97.

### Experimental procedure for Table 1.

An ethereal solution of  $\text{H}_2\text{O}_2$  (4.30 M, 0.698-2.326 mL, 3.0-10.0 mmol, 3.0-10.0 eq.) was added with stirring to **1a** (234.3 mg, 1.00 mmol, 1.0 eq.) in  $\text{Et}_2\text{O}$  or  $\text{CH}_3\text{CN}$  (3.5 mL). Later,  $\text{BF}_3 \cdot \text{Et}_2\text{O}$  (425.7 mg-1.419 g, 3.00-10.00 mmol, 3.0-10.0 eq.), 70% aq.  $\text{HClO}_4$  (1.435 g, 10.00 mmol, 10.0 eq.), 48% aq.



HBF<sub>4</sub> (1.829 g, 10.00 mmol, 10.0 eq.), TsOH·H<sub>2</sub>O (1.902 g, 10.00 mmol, 10.0 eq.), or PMA (2340.0 mg, 1.00 mmol, 1.0 eq.) was added in portions with stirring to the solution at 0 °C. The reaction mixture was stirred at 20-25 °C for 24 h. After that time, CH<sub>2</sub>Cl<sub>2</sub> (50 mL) was added and the organic layer was washed with brine (10 mL), a 5% aqueous NaHCO<sub>3</sub> solution (2 × 10 mL), and again with brine (10 mL), dried over MgSO<sub>4</sub>, filtered and concentrated under reduced pressure using a rotary evaporator (15-20 mmHg), (bath temperature, ca. 20–25 °C). Product **2a** was isolated by chromatography on SiO<sub>2</sub> with elution using PE-EtOAc mixture (4:1).

#### General experimental procedure for Scheme 5.

An ethereal solution of H<sub>2</sub>O<sub>2</sub> (4.30 M, 1.163 mL, 5.0 mmol, 5.0 eq.) was added with stirring to **1** (1.00 mmol, 1.0 eq.) in Et<sub>2</sub>O (3.5 mL). Later, BF<sub>3</sub>·Et<sub>2</sub>O (1.419 g, 10.00 mmol, 10.0 eq.) was added dropwise with stirring to the solution at 0 °C. The reaction mixture was stirred at 20-25 °C for 24 h. After that time, CH<sub>2</sub>Cl<sub>2</sub> (50 mL) and H<sub>2</sub>O (2 mL) was added and the mixture was neutralized by NaHCO<sub>3</sub>. The solid was filtrated. The solution was dried over MgSO<sub>4</sub>, filtered and concentrated under reduced pressure using a rotary evaporator (15-20 mmHg), (bath temperature, ca. 20–25 °C). Product **2** was isolated by chromatography on SiO<sub>2</sub> with elution using PE-EtOAc mixture (4:1).

#### Characterization data of synthesized $\gamma$ -hydroperoxy- $\gamma$ -peroxylactones

Correlation of *cis* and *trans* isomer signals is done based on H6-H5 cross-peaks of *trans*-isomer and H5'-H1' cross-peaks of *cis*-isomer in 2D NOESY.

#### 5-Benzyl-6-hydroperoxy-6-methyl-1,2-dioxan-3-one, **2a**

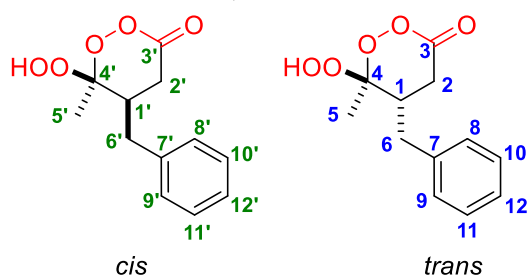

Yield 53% (126.2 mg, 0.53 mmol). White crystals.  $R_f = 0.31$  (PE:EtOAc = 5:1).

Peroxide **2a** was obtained as an inseparable mixture of *cis* and *trans* isomers. Isomer ratio = 22:78 (*cis* : *trans*).

*cis*-isomer:

<sup>1</sup>H NMR (300.13 MHz, CDCl<sub>3</sub>,  $\delta$ ): 8.68 (br.s., 1H, OOH'), 7.35 – 7.24 (m, 3H, H10', H11', H12'), 7.14 (d,  $J = 6.9$  Hz, 2H, H8', H9'), 3.12 (dd,  $J = 13.5, 4.5$  Hz, 1H, H6'<sub>a</sub>), 2.85 – 2.72 (m, 1H, H1'), 2.65 (dd,  $J = 15.8, 7.2$  Hz, 1H, H2'<sub>a</sub>), 2.45 – 2.30 (m, 1H, H'6<sub>b</sub>), 2.40 – 2.28 (m, 1H, H'2<sub>b</sub>), 1.67 (s, 3H, H5').

<sup>13</sup>C NMR (75.48 MHz, CDCl<sub>3</sub>,  $\delta$ ): 174.41 (C3'), 138.18 (C7'), 129.19 (C8'+C9'), 128.91 (C10'+C11'), 126.95 (C12'), 109.49 (C4'), 44.95 (C1'), 34.07 (C6'), 30.13 (C2'), 20.26 (C5').

*trans*-isomer:

$^1\text{H}$  NMR (300.13 MHz,  $\text{CDCl}_3$ ,  $\delta$ ): 8.77 (br.s, 1H, OOH), 7.35 – 7.24 (m, 3H, H10, H11, H12), 7.14 (d,  $J = 6.9$  Hz, 2H, H8, H9), 3.09 (dd,  $J = 13.5, 3.8$  Hz, 1H, H6<sub>a</sub>), 2.54 (dd,  $J = 13.5, 10.6$  Hz, 1H, H6<sub>b</sub>), 2.49 – 2.32 (m, 2H, H2), 2.38 – 2.22 (m, 1H, H1), 1.61 (s, 3H, H5).

$^{13}\text{C}$  NMR (75.48 MHz,  $\text{CDCl}_3$ ,  $\delta$ ): 175.49 (C3), 137.34 (C7), 129.03 (C8+C9), 128.88 (C10+C11), 127.24 (C12), 112.76 (C4), 41.61 (C1), 36.65 (C6), 30.48 (C2), 15.56 (C5).

HRMS (ESI)  $m/z$   $[\text{M} + \text{NH}_4]^+$ . Calcd for  $[\text{C}_{12}\text{H}_{18}\text{O}_5\text{N}]^+$ : 256.1179. Found: 256.1184.

Anal. Calcd for  $\text{C}_{12}\text{H}_{14}\text{O}_5$ : C, 60.50; H, 5.92. Found: C, 60.72; H, 6.03.

IR (KBr): 3422, 3020, 2817, 1773, 1619, 1513, 1427, 1349, 1272, 1148, 1021, 858  $\text{cm}^{-1}$ .

### 6-Hydroperoxy-6-methyl-5-(4-nitrobenzyl)-1,2-dioxan-3-one, **2b**

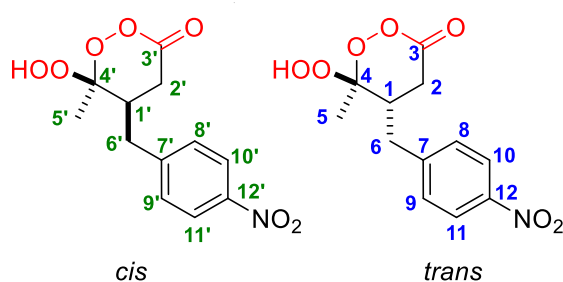

Yield 56% (158.6 mg, 0.56 mmol). White crystals.  $R_f = 0.28$  (PE:EtOAc = 5:1).

Peroxide **2b** was obtained as an inseparable mixture of *cis* and *trans* isomers. Isomer ratio = 24:76 (*cis* : *trans*).

*cis*-isomer:

$^1\text{H}$  NMR (300.13 MHz,  $\text{CDCl}_3$ ,  $\delta$ ): 9.17 (br.s., 1H, OOH'), 8.14 (d,  $J = 8.6$  Hz, 2H, H10', H11'), 7.33 (d,  $J = 8.6$  Hz, 2H, H8', H9'), 3.15 (dd,  $J = 13.8, 5.6$  Hz, 1H, H6'<sub>a</sub>), 2.94 – 2.81 (m, 1H, H1'), 2.76 – 2.65 (m, 1H, H2'<sub>a</sub>), 2.58 – 2.48 (m, 1H, H6'<sub>b</sub>), 2.34 – 2.26 (m, 1H, H2'<sub>b</sub>), 1.62 (s, 3H, H5').

$^{13}\text{C}$  NMR (75.48 MHz,  $\text{CDCl}_3$ ,  $\delta$ ): 174.46 (C3'), 146.92 (C12'), 146.12 (C7'), 130.08 (C8'+C9'), 123.99 (C10'+C11'), 109.22 (C4'), 44.32 (C1'), 33.95 (C6'), 30.52 (C2'), 20.33 (C5').

*trans*-isomer:

$^1\text{H}$  NMR (300.13 MHz,  $\text{CDCl}_3$ ,  $\delta$ ): 9.27 (br.s., 1H, OOH), 8.15 (d,  $J = 8.6$  Hz, 2H, H10, H11), 7.35 (d,  $J = 8.6$  Hz, 2H, H8, H9), 3.12 (dd,  $J = 13.8, 4.2$  Hz, 1H, H6<sub>a</sub>), 2.71 (dd,  $J = 13.8, 9.3$  Hz, 1H, H6<sub>b</sub>), 2.45 (d,  $J = 15.2$  Hz, 1H, H2<sub>a</sub>), 2.37 – 2.30 (m, 1H, H1), 2.30 (dd,  $J = 15.2, 2.8$  Hz, 1H, H2<sub>b</sub>), 1.56 (s, 3H, H5).

$^{13}\text{C}$  NMR (75.48 MHz,  $\text{CDCl}_3$ ,  $\delta$ ): 175.28 (C3), 147.08 (C12), 145.19 (C7), 129.83 (C8+C9), 124.12 (C10+C11), 112.43 (C4), 40.96 (C1), 36.20 (C6), 30.61 (C2), 15.45 (C5).

HRMS (ESI)  $m/z$   $[\text{M} + \text{NH}_4]^+$ . Calcd for  $[\text{C}_{12}\text{H}_{17}\text{O}_7\text{N}_2]^+$ : 301.1030. Found: 301.1021.

Anal. Calcd for  $\text{C}_{12}\text{H}_{13}\text{NO}_7$ : C, 50.89; H, 4.63; N, 4.95. Found: C, 50.55; H, 4.89; N, 5.08.

IR (thin layer): 3401, 3081, 3010, 2945, 2859, 1779, 1602, 1518, 1425, 1346, 1259, 1149, 1110, 857  $\text{cm}^{-1}$ .

### 5-(4-Chlorobenzyl)-6-hydroperoxy-6-methyl-1,2-dioxan-3-one, **2c**

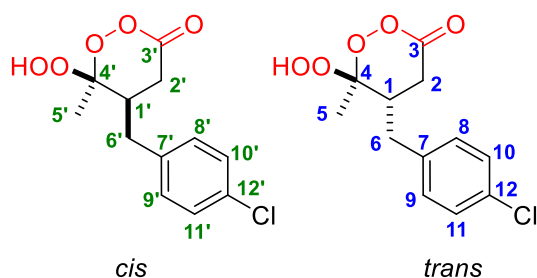

Yield 47% (128.2 mg, 0.47 mmol). Colorless oil.  $R_f = 0.30$  (PE:EtOAc = 5:1).

Peroxide **2c** was obtained as an inseparable mixture of *cis* and *trans* isomers. Isomer ratio = 23:77 (*cis* : *trans*).

*cis*-isomer:

$^1\text{H NMR}$  (300.13 MHz,  $\text{CDCl}_3$ ,  $\delta$ ): 8.96 (br.s., 1H, OOH'), 7.27 (d,  $J = 8.3$  Hz, 2H, H10', H11'), 7.07 (d,  $J = 8.3$  Hz, 2H, H8', H9'), 3.03 (dd,  $J = 14.1, 4.6$  Hz, 1H, H6'a), 2.80 – 2.69 (m, 1H, H1'), 2.64 (dd,  $J = 15.5, 7.1$  Hz, 1H, H2'a), 2.43 – 2.33 (m, 1H, H6'b), 2.38 – 2.27 (m, 1H, H2'b), 1.63 (s, 3H, H5').

$^{13}\text{C NMR}$  (75.48 MHz,  $\text{CDCl}_3$ ,  $\delta$ ): 174.52 (C3'), 136.65 (C7'), 132.78 (C12'), 130.53 (C8'+C9'), 129.01 (C10'+C11'), 109.38 (C4'), 44.80 (C1'), 33.41 (C6'), 30.22 (C2'), 20.31 (C5').

*trans*-isomer:

$^1\text{H NMR}$  (300.13 MHz,  $\text{CDCl}_3$ ,  $\delta$ ): 9.07 (br.s., 1H, OOH), 7.28 (d,  $J = 8.3$  Hz, 2H, H10, H11), 7.07 (2H, d,  $J = 8.3$  Hz, H8, H9), 3.01 (dd,  $J = 13.6, 4.1$  Hz, 1H, H6<sub>a</sub>), 2.51 (dd,  $J = 13.6, 10.8$  Hz, 1H, H6<sub>b</sub>), 2.38 – 2.26 (m, 2H, H2), 2.31 – 2.19 (m, 1H, H1), 1.57 (s, 3H, H5).

$^{13}\text{C NMR}$  (75.48 MHz,  $\text{CDCl}_3$ ,  $\delta$ ): 175.47 (C3), 135.83 (C7), 133.06 (C12), 130.20 (C8+C9), 129.15 (C10+C11), 112.61 (C4), 41.42 (C1), 35.92 (C6), 30.49 (C2), 15.49 (C5).

HRMS (ESI)  $m/z$  [ $\text{M} + \text{NH}_4$ ] $^+$ . Calcd for  $[\text{C}_{12}\text{H}_{17}\text{ClO}_5\text{N}]^+$ : 290.0790. Found: 290.0787.

Anal. Calcd for  $\text{C}_{12}\text{H}_{13}\text{ClO}_5$ : C, 52.86; H, 4.81; Cl, 13.00. Found: C, 52.54; H, 4.58; Cl, 12.90.

IR (thin layer): 3386, 2941, 1783, 1492, 1414, 1379, 1267, 1193, 1151, 1099, 856, 814, 510  $\text{cm}^{-1}$ .

### 5-(4-Bromobenzyl)-6-hydroperoxy-6-methyl-1,2-dioxan-3-one, **2d**

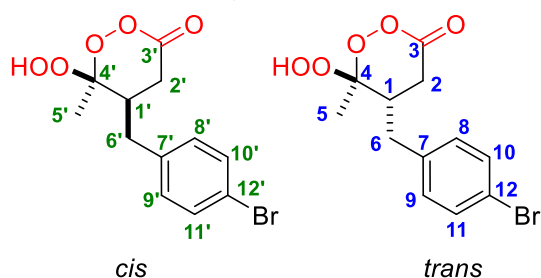

Yield 44% (139.5 mg, 0.44 mmol). Colorless oil.  $R_f = 0.25$  (PE:EtOAc = 5:1).

Peroxide **2d** was obtained as an inseparable mixture of *cis* and *trans* isomers. Isomer ratio = 23:77 (*cis* : *trans*).

*cis*-isomer:

<sup>1</sup>H NMR (300.13 MHz, CDCl<sub>3</sub>, δ): 9.00 – 8.30 (br.s., OOH'), 7.43 (d, *J* = 8.2 Hz, 2H, H10', H11'), 7.02 (d, *J* = 8.2 Hz, 2H, H8', H9'), 3.03 (dd, *J* = 14.1, 4.8 Hz, 1H, H6'<sub>a</sub>), 2.79 – 2.70 (m, 1H, H1'), 2.64 (dd, *J* = 15.4, 7.0 Hz, 1H, H2'<sub>a</sub>), 2.42 – 2.32 (m, 1H, H6'<sub>b</sub>), 2.42 – 2.26 (m, 1H, H2'<sub>b</sub>), 1.64 (s, 3H, H5').

<sup>13</sup>C NMR (75.48 MHz, CDCl<sub>3</sub>, δ): 174.21 (C3'), 137.16 (C7'), 132.04 (C10'+C11'), 130.93 (C8'+C9'), 120.91 (C12'), 109.41 (C4'), 44.87 (C1'), 33.50 (C6'), 30.26 (C2'), 20.42 (C5').

*trans*-isomer:

<sup>1</sup>H NMR (300.13 MHz, CDCl<sub>3</sub>, δ): 9.00 – 8.30 (br.s., OOH), 7.44 (d, *J* = 8.2 Hz, 2H, H10, H11), 7.02 (d, *J* = 8.2 Hz, 2H, H8, H9), 3.00 (dd, *J* = 13.6, 4.1 Hz, 1H, H6<sub>a</sub>), 2.50 (dd, *J* = 13.6, 10.7 Hz, 1H, H6<sub>b</sub>), 2.42 – 2.28 (m, 2H, H2), 2.32 – 2.19 (m, 1H, H1), 1.58 (s, 3H, H5).

<sup>13</sup>C NMR (75.48 MHz, CDCl<sub>3</sub>, δ): 175.15 (C3), 136.31 (C7), 132.18 (C10+C11), 130.57 (C8+C9), 121.19 (C12), 112.61 (C4), 41.40 (C1), 36.07 (C6), 30.54 (C2), 15.57 (C5).

HRMS (ESI) *m/z* [M + Na]<sup>+</sup>. Calcd for [C<sub>12</sub>H<sub>13</sub>BrO<sub>5</sub>Na]<sup>+</sup>: 338.9839, 340.9819. Found: 338.9835, 340.9821.

Anal. Calcd for C<sub>12</sub>H<sub>13</sub>BrO<sub>5</sub>: C, 45.45; H, 4.13; Br, 25.20. Found: C, 45.11; H, 4.34; Br, 25.07.

IR (thin layer): 3383, 2931, 1783, 1717, 1488, 1410, 1378, 1266, 1193, 1150, 1071, 857, 810 cm<sup>-1</sup>.

### 5-(4-(*Tert*-butyl)benzyl)-6-hydroperoxy-6-methyl-1,2-dioxan-3-one, **2e**

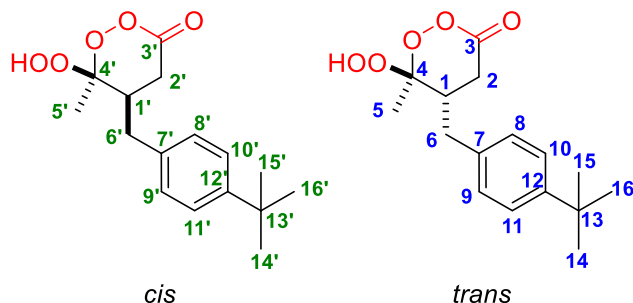

Yield 67% (197.2 mg, 0.67 mmol). White crystals. *R<sub>f</sub>* = 0.41 (PE:EtOAc = 5:1).

Peroxide **2e** was obtained as an inseparable mixture of *cis* and *trans* isomers. Isomer ratio = 21:79 (*cis* : *trans*).

*cis*-isomer:

<sup>1</sup>H NMR (300.13 MHz, CDCl<sub>3</sub>, δ): 8.51 (s, 1H, OOH'), 7.34 (d, 2H, *J* = 8.2 Hz, H10', H11'), 7.07 (d, *J* = 8.2 Hz, 2H, H8', H9'), 3.07 (dd, *J* = 13.5, 4.2 Hz, 1H, H6'<sub>a</sub>), 2.82 – 2.70 (m, 1H, H1'), 2.62 (dd, *J* = 15.6, 7.0 Hz, 1H, H2'<sub>a</sub>), 2.42 (dd, *J* = 13.5, 3.9 Hz, 1H, H6'<sub>b</sub>), 2.45 – 2.28 (m, 1H, H2'<sub>b</sub>), 1.68 (s, 3H, H5'), 1.31 (s, 9H, *t*-Bu').

<sup>13</sup>C NMR (75.48 MHz, CDCl<sub>3</sub>, δ): 174.35 (C3'), 149.90 (C7'), 135.03 (C12'), 128.87 (C8'+C9'), 125.83 (C10'+C11'), 109.55 (C4'), 45.01 (C1'), 34.59 (C6'), 33.48 (C13'), 31.45 (C14'+C15'+C16'), 30.14 (C2'), 20.29 (C5').

*trans*-isomer:

$^1\text{H}$  NMR (300.13 MHz,  $\text{CDCl}_3$ ,  $\delta$ ): 8.63 (s, 1H, OOH), 7.34 (d,  $J = 8.2$  Hz, 2H, H10, H11), 7.06 (d,  $J = 8.2$  Hz, 2H, H8, H9), 3.04 (dd,  $J = 13.3, 3.6$  Hz, 1H, H6<sub>a</sub>), 2.48 (dd,  $J = 13.3, 10.9$  Hz, 1H, H6<sub>b</sub>), 2.45 – 2.28 (m, 2H, H2), 2.34 – 2.19 (m, 1H, H1), 1.61 (s, 3H, H5), 1.32 (s, 9H, *t*-Bu).

$^{13}\text{C}$  NMR (75.48 MHz,  $\text{CDCl}_3$ ,  $\delta$ ): 175.51 (C3), 150.20 (C7), 134.20 (C12), 128.57 (C8+C9), 125.96 (C10+C11), 112.82 (C4), 41.69 (C1), 36.14 (C6), 33.48 (C13), 31.45 (C14+C15+C16), 30.48 (C2), 15.58 (C5).

HRMS (ESI)  $m/z$   $[\text{M} + \text{Na}]^+$ . Calcd for  $[\text{C}_{16}\text{H}_{22}\text{O}_5\text{Na}]^+$ : 317.1359. Found: 317.1361.

Anal. Calcd for  $\text{C}_{16}\text{H}_{22}\text{O}_5$ : C, 65.29; H, 7.53. Found: C, 65.27; H, 7.56.

IR (KBr): 3351, 2964, 1781, 1419, 1272, 1372, 1272, 1196, 1147, 1108, 858, 823, 560  $\text{cm}^{-1}$ .

### 6-Hydroperoxy-6-methyl-5-(4-methylbenzyl)-1,2-dioxan-3-one, 2f

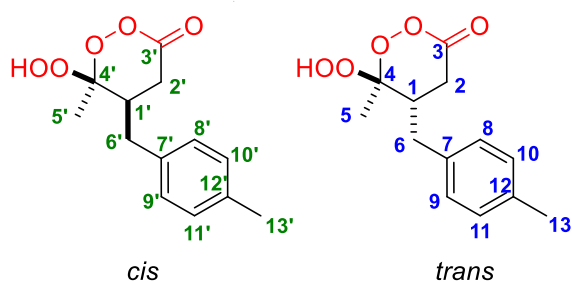

Yield 64% (161.5 mg, 0.64 mmol). Colorless oil.  $R_f = 0.35$  (PE:EtOAc = 5:1).

Peroxide **2f** was obtained as an inseparable mixture of *cis* and *trans* isomers. Isomer ratio = 24:76 (*cis* : *trans*).

*cis*-isomer:

$^1\text{H}$  NMR (300.13 MHz,  $\text{CDCl}_3$ ,  $\delta$ ): 9.00 – 8.00 (br.s., 1H, OOH'), 7.12 (d,  $J = 7.9$  Hz, 2H, H10', H11'), 7.02 (d,  $J = 7.8$  Hz, 2H, H8', H9'), 3.06 (dd,  $J = 13.9, 4.4$  Hz, 1H, H6'<sub>a</sub>), 2.80 – 2.67 (m, 1H, H1'), 2.61 (dd,  $J = 16.2, 7.0$  Hz, 1H, H2'<sub>a</sub>), 2.44 – 2.33 (m, 1H, H6'<sub>b</sub>), 2.44 – 2.26 (m, 1H, H2'<sub>b</sub>), 2.33 (s, 3H, H13'), 1.66 (s, 3H, H5').

$^{13}\text{C}$  NMR (75.48 MHz,  $\text{CDCl}_3$ ,  $\delta$ ): 136.54 (C12'), 135.06 (C7'), 129.58 (C10'+C11'), 129.06 (C8'+C9'), 109.51 (C4'), 45.04 (C1'), 33.62 (C6'), 30.10 (C2'), 21.10 (C13'), 20.26 (C5'), (C3' carbon missing).

*trans*-isomer:

$^1\text{H}$  NMR (300.13 MHz,  $\text{CDCl}_3$ ,  $\delta$ ): 9.00 – 8.00 (br.s., 1H, OOH), 7.12 (d,  $J = 7.9$  Hz, 2H, H10, H11), 7.02 (d,  $J = 7.8$  Hz, 2H, H8, H9), 3.02 (dd,  $J = 13.3, 3.7$  Hz, 1H, H6<sub>a</sub>), 2.48 (dd,  $J = 13.3, 10.9$  Hz, 1H, H6<sub>b</sub>), 2.44 – 2.26 (m, 2H, H2), 2.33 (s, 3H, H13), 2.32 – 2.19 (m, 1H, H1), 1.59 (s, 3H, H5).

$^{13}\text{C}$  NMR (75.48 MHz,  $\text{CDCl}_3$ ,  $\delta$ ): 175.47 (C3), 136.85 (C12), 134.23 (C7), 129.69 (C10+C11), 128.74 (C8+C9), 112.79 (C4), 41.70 (C1), 36.24 (C6), 30.48 (C2), 21.10 (C13), 15.55 (C5).

HRMS (ESI)  $m/z$   $[\text{M} + \text{NH}_4]^+$ . Calcd for  $[\text{C}_{13}\text{H}_{20}\text{O}_5\text{N}]^+$ : 270.1336. Found: 270.1342.

Anal. Calcd for  $\text{C}_{13}\text{H}_{16}\text{O}_5$ : C, 61.90; H, 6.39. Found: C, 61.94; H, 6.43.

IR (KBr): 3447, 3012, 2948, 1761, 1518, 1383, 1349, 1270, 1193, 1149, 1109, 880, 809, 513  $\text{cm}^{-1}$ .

## 6-Hydroperoxy-6-methyl-5-(3-methylbenzyl)-1,2-dioxan-3-one, **2g**

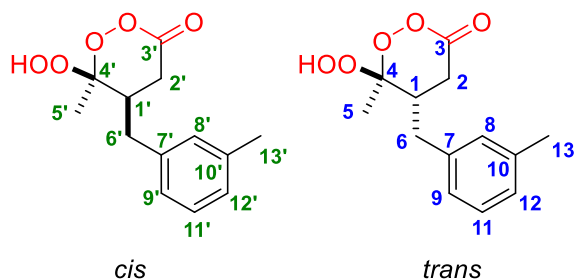

Yield 71% (180.0 mg, 0.71 mmol). White crystals.  $R_f = 0.35$  (PE:EtOAc = 5:1).

Peroxide **2g** was obtained as an inseparable mixture of *cis* and *trans* isomers. Isomer ratio = 13:87 (*cis* : *trans*).

*cis*-isomer:

$^1\text{H NMR}$  (300.13 MHz,  $\text{CDCl}_3$ ,  $\delta$ ): 8.48 (br.s., 1H, OOH'), 7.20 (t,  $J = 7.5$  Hz, 1H, H11'), 7.07 (d,  $J = 7.5$  Hz, H12'), 6.99 – 6.87 (m, 2H, H8', H9'), 3.06 (dd,  $J = 13.9, 4.1$  Hz, 1H, H6'a), 2.84 – 2.70 (m, 1H, H1'), 2.61 (dd,  $J = 15.6, 7.2$  Hz, 1H, H2'a), 2.41 – 2.30 (m, 1H, H6'b), 2.42 – 2.27 (m, 1H, H2'b), 2.33 (s, 3H, H13'), 1.68 (s, 3H, H5').

$^{13}\text{C NMR}$  (75.48 MHz,  $\text{CDCl}_3$ ,  $\delta$ ): 174.65 (C3'), 139.51 (C10'), 138.10 (C7'), 129.91 ( $\text{C}_{Ar}'$ ), 128.82 (C11'), 127.71 (C12'), 126.22 ( $\text{C}_{Ar}'$ ), 109.51 (C4'), 44.96 (C1'), 33.98 (C6'), 30.09 (C2'), 21.48 (C13'), 20.25 (C5').

*trans*-isomer:

$^1\text{H NMR}$  (300.13 MHz,  $\text{CDCl}_3$ ,  $\delta$ ): 8.60 (br.s., 1H, OOH), 7.20 (t,  $J = 7.5$  Hz, 1H, H11), 7.07 (d,  $J = 7.5$  Hz, H12), 6.99 – 6.87 (m, 2H, H8, H9), 3.03 (dd,  $J = 13.2, 3.6$  Hz, 1H, H6a), 2.47 (dd,  $J = 13.2, 10.8$  Hz, 1H, H6b), 2.43 – 2.27 (m, 2H, H2), 2.33 (s, 3H, H13), 2.32 – 2.20 (m, 1H, H1), 1.60 (s, 3H, H5).

$^{13}\text{C NMR}$  (75.48 MHz,  $\text{CDCl}_3$ ,  $\delta$ ): 175.43 (C3), 138.75 (C10), 137.26 (C7), 129.63 ( $\text{C}_{Ar}$ ), 128.91 (C11), 128.01 (C12), 125.93 ( $\text{C}_{Ar}$ ), 112.79 (C4), 41.67 (C1), 36.60 (C6), 30.48 (C2), 21.48 (C13), 15.58 (C5).

HRMS (ESI)  $m/z$   $[\text{M} + \text{Na}]^+$ . Calcd for  $[\text{C}_{13}\text{H}_{16}\text{O}_5\text{Na}]^+$ : 275.0890. Found: 275.0884.

Anal. Calcd for  $\text{C}_{13}\text{H}_{16}\text{O}_5$ : C, 61.90; H, 6.39. Found: C, 61.85; H, 6.18.

IR (KBr): 3343, 3016, 1770, 1601, 1418, 1277, 1197, 1146, 1101, 856, 572  $\text{cm}^{-1}$ .

## 6-Hydroperoxy-5-(3-methoxybenzyl)-6-methyl-1,2-dioxan-3-one, **2h**

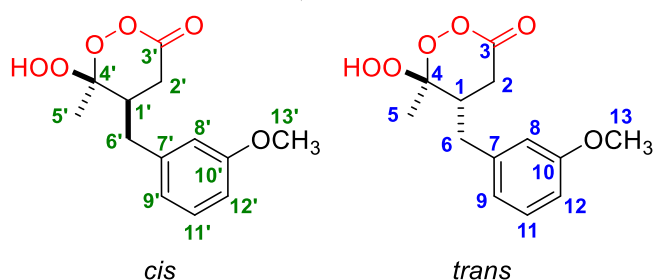

Yield 62% (166.3 mg, 0.62 mmol). Colorless oil.  $R_f = 0.20$  (PE:EtOAc = 5:1).

Peroxide **2h** was obtained as an inseparable mixture of *cis* and *trans* isomers. Isomer ratio = 20:80 (*cis* : *trans*).

*cis*-isomer:

$^1\text{H}$  NMR (300.13 MHz,  $\text{CDCl}_3$ ,  $\delta$ ): 8.63 (br.s, 1H, OOH'), 7.24 (t,  $J = 7.8$  Hz, 1H, H11'), 6.81 (dd,  $J = 8.3, 2.7$  Hz, H12'), 6.73 (d,  $J = 7.8$  Hz, H9'), 6.70 – 6.67 (m, 1H, H8'), 3.80 (s, 3H, H13'), 3.07 (dd,  $J = 13.8, 5.5$  Hz, 1H, H6'a), 2.84 – 2.71 (m, 1H, H1'), 2.62 (dd,  $J = 15.7, 7.0$  Hz, 1H, H2'a), 2.41 – 2.32 (m, 1H, H6'b), 2.44 – 2.27 (m, 1H, H2'b), 1.67 (s, 3H, H5').

$^{13}\text{C}$  NMR (75.48 MHz,  $\text{CDCl}_3$ ,  $\delta$ ): 139.76 (C7'), 129.96 (C11'), 121.51 (C9'), 115.01 (C8'), 112.26 (C12'), 109.49 (C4'), 55.37 (C13'), 44.90 (C1'), 34.10 (C6'), 30.18 (C2'), 20.30 (C5') (C3' and C10' carbons missing).

*trans*-isomer:

$^1\text{H}$  NMR (300.13 MHz,  $\text{CDCl}_3$ ,  $\delta$ ): 8.63 (br.s, 1H, OOH), 7.24 (t,  $J = 7.8$  Hz, 1H, H11), 6.81 (dd,  $J = 8.3, 2.7$  Hz, H12), 6.73 (d,  $J = 7.8$  Hz, H9), 6.70 – 6.67 (m, 1H, H8), 3.80 (s, 3H, H13), 3.04 (dd,  $J = 13.3, 3.5$  Hz, 1H, H6a), 2.48 (dd,  $J = 13.3, 10.9$  Hz, 1H, H6b), ), 2.44 – 2.27 (m, 2H, H2), 2.37 – 2.19 (m, 1H, H1), 1.59 (s, 3H, H5).

$^{13}\text{C}$  NMR (75.48 MHz,  $\text{CDCl}_3$ ,  $\delta$ ): 175.31 (C3), 160.08 (C10), 138.90 (C7), 130.08 (C11), 121.22 (C9), 114.83 (C8), 112.74 (C4), 112.42 (C12), 55.37 (C13), 41.57 (C1), 36.70 (C6), 30.53 (C2), 15.59 (C5).

HRMS (ESI)  $m/z$   $[\text{M} + \text{NH}_4]^+$ . Calcd for  $[\text{C}_{13}\text{H}_{20}\text{O}_6\text{N}]^+$ : 286.1285. Found: 286.1288.

Anal. Calcd for  $\text{C}_{13}\text{H}_{16}\text{O}_6$ : C, 58.20; H, 6.01. Found: C, 58.16; H, 6.23.

IR (KBr): 3368, 3028, 2940, 2902, 1768, 1609, 1583, 1491, 1428, 1273, 1197, 1152, 1104, 1048, 857  $\text{cm}^{-1}$ .

### 5-(2-Chlorobenzyl)-6-hydroperoxy-6-methyl-1,2-dioxan-3-one, **2i**

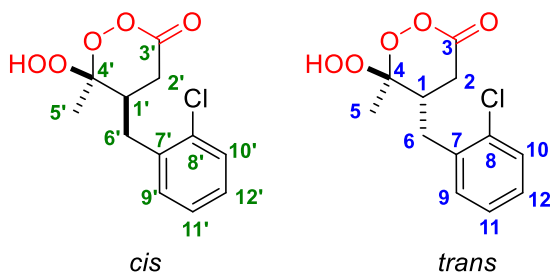

Yield 78% (212.7 mg, 0.78 mmol). Colorless oil.  $R_f = 0.38$  (PE:EtOAc = 5:1).

Peroxide **2i** was obtained as an inseparable mixture of *cis* and *trans* isomers. Isomer ratio = 28:72 (*cis* : *trans*).

*cis*-isomer:

$^1\text{H}$  NMR (300.13 MHz,  $\text{CDCl}_3$ ,  $\delta$ ): 7.40 – 7.33 (m, 1H, H10'), 7.24 – 7.15 (m, 3H, H9', H11', H12'), 3.29 (dd,  $J = 13.9, 4.1$  Hz, 1H, H6'a), 3.05 – 2.90 (m, 1H, H1'), 2.63 (dd,  $J = 15.9, 7.4$  Hz, 1H, H2'a), 2.53 – 2.31 (m, 1H, H2'b), 2.46 – 2.33 (m, 1H, H6'b), 1.68 (s, 3H, H5'), (OOH' protons missing).

$^{13}\text{C}$  NMR (75.48 MHz,  $\text{CDCl}_3$ ,  $\delta$ ): 174.28 (C3'), 135.67 (C7'), 134.03 (C8'), 132.25 (C9'), 130.08 (C10'), 128.72 (C11'), 127.26 (C12'), 109.48 (C4'), 42.13 (C1'), 32.44 (C6'), 30.13 (C2'), 19.99 (C5').

*trans*-isomer:

$^1\text{H}$  NMR (300.13 MHz,  $\text{CDCl}_3$ ,  $\delta$ ): 7.40 – 7.33 (m, 1H, H10), 7.24 – 7.15 (m, 3H, H9, H11, H12), 3.13 (dd,  $J = 13.4, 3.2$  Hz, 1H, H6<sub>a</sub>), 2.77 (dd,  $J = 13.4, 10.7$  Hz, 1H, H6<sub>b</sub>), 2.53 – 2.31 (m, 2H, H2), 2.48 – 2.31 (m, 1H, H1), 1.63 (s, 3H, H5), (OOH protons missing).

$^{13}\text{C}$  NMR (75.48 MHz,  $\text{CDCl}_3$ ,  $\delta$ ): 175.32 (C3), 135.10 (C7), 134.23 (C8), 131.10 (C9), 130.20 (C10), 128.86 (C11), 127.40 (C12), 112.69 (C4), 40.26 (C1), 33.84 (C6), 30.42 (C2), 15.57 (C5).

HRMS (ESI)  $m/z$   $[\text{M} + \text{NH}_4]^+$ . Calcd for  $[\text{C}_{12}\text{H}_{17}\text{ClO}_5\text{N}]^+$ : 290.0790. Found: 290.0796.

Anal. Calcd for  $\text{C}_{12}\text{H}_{13}\text{ClO}_5$ : C, 52.86; H, 4.81; Cl, 13.00. Found: C, 52.99; H, 5.02; Cl, 12.83.

IR (KBr): 3366, 3060, 2940, 1763, 1441, 1411, 1274, 1195, 1153, 1104, 1051, 858, 751  $\text{cm}^{-1}$ .

### 5-Butyl-6-hydroperoxy-6-methyl-1,2-dioxan-3-one, **2j**

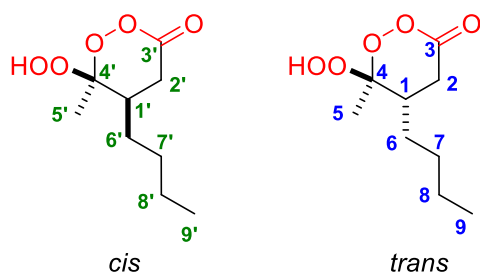

Yield 72% (147.0 mg, 0.72 mmol). Colorless oil.  $R_f = 0.44$  (PE:EtOAc = 5:1).

Peroxide **2j** was obtained as an inseparable mixture of *cis* and *trans* isomers. Isomer ratio = 13:87 (*cis* : *trans*).

*cis*-isomer:

$^1\text{H}$  NMR (300.13 MHz,  $\text{CDCl}_3$ ,  $\delta$ ): 8.91 (br.s., 1H, OOH'), 2.79 (dd,  $J = 16.8, 8.4$  Hz, 1H, H2'<sub>a</sub>), 2.51 – 2.37 (m, 1H, H2'<sub>b</sub>), 2.48 – 2.38 (m, 1H, H1'), 1.59 (s, 3H, H5'), 1.53 – 1.43 (m, 1H, H6'<sub>a</sub>), 1.39 – 1.18 (m, 3H, H6'<sub>b</sub>, H7', H8'), 0.88 (t,  $J = 6.5$  Hz, 3H, H9').

$^{13}\text{C}$  NMR (75.48 MHz,  $\text{CDCl}_3$ ,  $\delta$ ): 174.68 (C3'), 109.47 (C4'), 42.87 (C1'), 31.02 (C2'), 29.71 (C6'), 27.95 (C7'), 22.72 (C8'), 20.03 (C5'), 13.84 (C9').

*trans*-isomer:

$^1\text{H}$  NMR (300.13 MHz,  $\text{CDCl}_3$ ,  $\delta$ ): 9.10 (br.s., 1H, OOH), 2.53 (dd,  $J = 14.9, 3.5$  Hz, 1H, H2<sub>a</sub>), 2.34 (dd,  $J = 14.9, 13.7$  Hz, 1H, H2<sub>b</sub>), 2.03 – 1.80 (m, 1H, H1), 1.64 – 1.52 (m, 1H, H6<sub>a</sub>), 1.47 (s, 3H, H5), 1.39 – 1.18 (m, 3H, H6<sub>b</sub>, H7, H8), 0.88 (t,  $J = 6.5$  Hz, 3H, H9).

$^{13}\text{C}$  NMR (75.48 MHz,  $\text{CDCl}_3$ ,  $\delta$ ): 176.26 (C3), 113.20 (C4), 39.84 (C1), 31.45 (C2), 29.97 (C6), 29.62 (C7), 22.50 (C8), 15.06 (C5), 13.84 (C9).

HRMS (ESI)  $m/z$   $[\text{M} + \text{Na}]^+$ . Calcd for  $[\text{C}_9\text{H}_{16}\text{O}_5\text{Na}]^+$ : 227.0890. Found: 227.0890.

Anal. Calcd for  $\text{C}_9\text{H}_{16}\text{O}_5$ : C, 52.93; H, 7.90. Found: C, 53.22; H, 8.28.

IR (thin layer): 3393, 2957, 2935, 1784, 1461, 1423, 1380, 1265, 1214, 1163, 1111, 859  $\text{cm}^{-1}$ .



## 5-Hexyl-6-hydroperoxy-6-methyl-1,2-dioxan-3-one, 2k

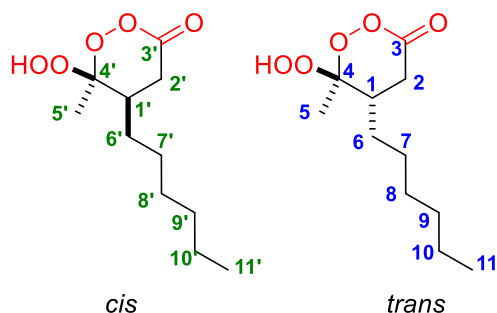

Yield 26% (60.4 mg, 0.26 mmol). Colorless oil.  $R_f = 0.38$  (PE:EtOAc = 5:1).

Peroxide **2k** was obtained as an inseparable mixture of *cis* and *trans* isomers. Isomer ratio = 14:86 (*cis* : *trans*).

*cis*-isomer:

$^1\text{H NMR}$  (300.13 MHz,  $\text{CDCl}_3$ ,  $\delta$ ): 8.45 (s., 1H, OOH'), 2.80 (dd,  $J = 16.7, 8.5$  Hz, 1H,  $\text{H}2'_a$ ), 2.53 – 2.38 (m, 1H,  $\text{H}2'_b$ ), 2.52 – 2.44 (m, 1H,  $\text{H}1'$ ), 1.70 – 1.55 (m, 1H,  $\text{H}6'_a$ ), 1.62 (s, 3H,  $\text{H}5'$ ), 1.39 – 1.20 (m, 9H,  $\text{H}6'_b, \text{H}7', \text{H}8', \text{H}9', \text{H}10'$ ), 0.88 (t,  $J = 6.4$  Hz, 3H,  $\text{H}11'$ ).

$^{13}\text{C NMR}$  (75.48 MHz,  $\text{CDCl}_3$ ,  $\delta$ ): 43.04 ( $\text{C}1'$ ), 31.64 ( $\text{C}9'$ ), 31.09 ( $\text{C}2'$ ), 28.30 ( $\text{C}_{\text{Alk}}'$ ), 27.63 ( $\text{C}_{\text{Alk}}'$ ), 20.15 ( $\text{C}5'$ ), 14.11 ( $\text{C}11'$ ) ( $\text{C}3', \text{C}4', \text{C}6'$  and  $\text{C}_{\text{Alk}}'$  carbons missing)

*trans*-isomer:

$^1\text{H NMR}$  (300.13 MHz,  $\text{CDCl}_3$ ,  $\delta$ ): 8.63 (s., 1H, OOH), 2.55 (dd,  $J = 14.9, 3.5$  Hz, 1H,  $\text{H}2_a$ ), 2.35 (dd,  $J = 14.9, 13.6$  Hz, 1H,  $\text{H}2_b$ ), 1.98 – 1.90 (m, 1H,  $\text{H}1$ ), 1.70 – 1.55 (m, 1H,  $\text{H}6_a$ ), 1.49 (s, 3H,  $\text{H}5$ ), 1.39 – 1.20 (m, 9H,  $\text{H}6_b, \text{H}7, \text{H}8, \text{H}9, \text{H}10,$ ), 0.88 (t,  $J = 6.4$  Hz, 3H,  $\text{H}11$ ).

$^{13}\text{C NMR}$  (75.48 MHz,  $\text{CDCl}_3$ ,  $\delta$ ): 175.89 ( $\text{C}3$ ), 113.26 ( $\text{C}4$ ), 39.93 ( $\text{C}1$ ), 31.64 ( $\text{C}9$ ), 31.53 ( $\text{C}2$ ), 30.41 ( $\text{C}6$ ), 29.16 ( $\text{C}_{\text{Alk}}$ ), 27.55 ( $\text{C}_{\text{Alk}}$ ), 22.65 ( $\text{C}_{\text{Alk}}$ ), 15.18 ( $\text{C}5$ ), 14.11 ( $\text{C}11$ ).

HRMS (ESI)  $m/z$  [ $\text{M} + \text{Na}$ ] $^+$ . Calcd for [ $\text{C}_{11}\text{H}_{20}\text{O}_5\text{Na}$ ] $^+$ : 255.1203. Found: 255.1210.

Anal. Calcd for  $\text{C}_{11}\text{H}_{20}\text{O}_5$ : C, 56.88; H, 8.68. Found: C, 56.33; H, 8.42.

IR (thin layer): 3395, 2930, 2861, 1786, 1718, 1461, 1424, 1379, 1270, 1246, 1159, 859  $\text{cm}^{-1}$ .

## 6-Hydroperoxy-6-methyl-5-octyl-1,2-dioxan-3-one, 2l

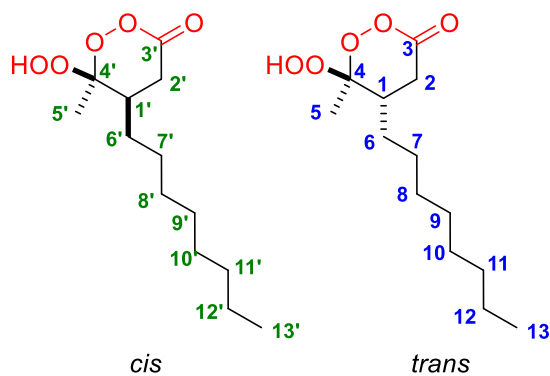

Yield 68% (177.0 mg, 0.68 mmol). Colorless oil.  $R_f = 0.48$  (PE:EtOAc = 5:1).

Peroxide **2l** was obtained as an inseparable mixture of *cis* and *trans* isomers. Isomer ratio = 17:83 (*cis* : *trans*).

*cis*-isomer:

<sup>1</sup>H NMR (300.13 MHz, CDCl<sub>3</sub>, δ): 8.53 (br.s, 1H, OOH'), 2.80 (dd, *J* = 16.7, 8.4 Hz, 1H, H2'a), 2.59 – 2.29 (m, 1H, H2'b), 2.49 – 2.42 (m, 1H, H1'), 1.72 – 1.53 (m, 1H, H6'a), 1.61 (s, 3H, H5'), 1.38 – 1.22 (m, 13H, H6'b, H7', H8', H9', H10', H11', H12'), 0.87 (t, *J* = 7.0 Hz, 3H, H13').

<sup>13</sup>C NMR (75.48 MHz, CDCl<sub>3</sub>, δ): 109.53 (C4'), 43.00 (C1'), 31.07 (C2'), 28.29 (C6'), 27.65 (C<sub>Alk</sub>'), 20.12 (C5'), 14.18 (C13') (C3' and 5 C<sub>Alk</sub>' carbons missing).

*trans*-isomer:

<sup>1</sup>H NMR (300.13 MHz, CDCl<sub>3</sub>, δ): 8.71 (br.s, 1H, OOH), 2.55 (dd, *J* = 14.9, 3.5 Hz, 1H, H2<sub>a</sub>), 2.35 (dd, *J* = 14.9, 13.5 Hz, 1H, H2<sub>b</sub>), 2.04 – 1.83 (m, 1H, H1), 1.72 – 1.53 (m, 1H, H6<sub>a</sub>), 1.49 (s, 3H, H5), 1.38 – 1.22 (m, 13H, H6<sub>b</sub>, H7, H8, H9, H10, H11, H12), 0.87 (t, *J* = 7.0 Hz, 3H, H13).

<sup>13</sup>C NMR (75.48 MHz, CDCl<sub>3</sub>, δ): 175.97 (C3), 113.25 (C4), 39.92 (C1), 31.90 (C<sub>Alk</sub>), 31.52 (C2), 30.40 (C6), 29.50 (C<sub>Alk</sub>), 29.42 (C<sub>Alk</sub>), 29.28 (C<sub>Alk</sub>), 27.58 (C<sub>Alk</sub>), 22.74 (C<sub>Alk</sub>), 15.16 (C5), 14.18 (C13).

HRMS (ESI) *m/z* [M + Na]<sup>+</sup>. Calcd for [C<sub>13</sub>H<sub>24</sub>O<sub>5</sub>Na]<sup>+</sup>: 283.1516. Found: 283.1512.

Anal. Calcd for C<sub>13</sub>H<sub>24</sub>O<sub>5</sub>: C, 59.98; H, 9.29. Found: C, 60.05; H, 9.36.

IR (thin layer): 3386, 2928, 2858, 1785, 1461, 1379, 1263, 1159, 1111, 859 cm<sup>-1</sup>.

### 6-Hydroperoxy-6-methyl-1,2-dioxan-3-one, **2m**

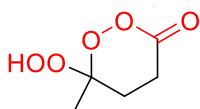

Yield 60% (88.9 mg, 0.60 mmol). White solid, mp = 69-70 °C. *R<sub>f</sub>* = 0.17 (PE:EtOAc = 2:1).

<sup>1</sup>H NMR (300.13 MHz, CDCl<sub>3</sub>, δ): 8.71 (s, 1H), 2.72 – 2.56 (m, 2H), 2.36 (ddd, *J* = 14.5, 6.2, 2.6 Hz, 1H), 1.97 (ddd, *J* = 13.9, 13.9, 5.4 Hz, 1H), 1.64 (s, 3H).

<sup>13</sup>C NMR (75.48 MHz, CDCl<sub>3</sub>, δ): 175.54, 109.64, 30.26, 26.06, 19.97.

HRMS (ESI) *m/z* [M + Na]<sup>+</sup>. Calcd for [C<sub>5</sub>H<sub>8</sub>O<sub>5</sub>Na]<sup>+</sup>: 171.0264. Found: 171.0260.

Anal. Calcd for C<sub>5</sub>H<sub>8</sub>O<sub>5</sub>: C, 40.55; H, 5.44. Found: C, 40.65; H, 5.32.

IR (thin layer): 3335, 2820, 1777, 1714, 1566, 1416, 1157, 1107, 1013, 923, 855, 764 cm<sup>-1</sup>.

### 6-Hydroperoxy-4,6-dimethyl-1,2-dioxan-3-one, **2n**

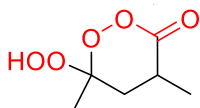

Yield 83% (134.6 mg, 0.83 mmol). White solid, mp = 63-64 °C. *R<sub>f</sub>* = 0.18 (PE:EtOAc = 5:1).

<sup>1</sup>H NMR (300.13 MHz, CDCl<sub>3</sub>, δ): 8.96 (br.s, 1H), 2.90 – 2.71 (m, 1H), 2.32 (dd, *J* = 14.3, 6.1 Hz, 1H), 1.73 (t, *J* = 13.9 Hz, 1H), 1.62 (s, 3H), 1.22 (d, *J* = 6.8 Hz, 3H).

<sup>13</sup>C NMR (75.48 MHz, CDCl<sub>3</sub>, δ): 178.56, 110.34, 38.31, 30.93, 20.11, 13.29.

HRMS (ESI) *m/z* [M + NH<sub>4</sub>]<sup>+</sup>. Calcd for [C<sub>6</sub>H<sub>14</sub>O<sub>5</sub>N]<sup>+</sup>: 180.0866. Found: 180.0864.

Anal. Calcd for C<sub>6</sub>H<sub>10</sub>O<sub>5</sub>: C, 44.45; H, 6.92. Found: C, 44.58; H, 6.13.

IR (KBr): 3360, 2990, 2943, 1757, 1458, 1379, 1268, 1166, 1064, 850, 568 cm<sup>-1</sup>.

### General experimental procedure for Scheme 7.

An ethereal solution of H<sub>2</sub>O<sub>2</sub> (4.30 M, 1.163 mL, 5.0 mmol, 5.0 eq.) was added with stirring to **1** (1.00 mmol, 1.0 eq.) in Et<sub>2</sub>O (3.5 mL). Later, BF<sub>3</sub>·Et<sub>2</sub>O (1.419 g, 10.00 mmol, 10.0 eq.) was added dropwise with stirring to the solution at 0 °C. The reaction mixture was stirred at 20-25 °C for 24 h. After that time, CH<sub>2</sub>Cl<sub>2</sub> (50 mL) and H<sub>2</sub>O (2 mL) was added and the mixture was neutralized by NaHCO<sub>3</sub>. The solid was filtrated. The solution was dried over MgSO<sub>4</sub>, filtered and concentrated under reduced pressure using a rotary evaporator (15-20 mmHg), (bath temperature, ca. 20–25 °C). Products **6**, **7** and the least polar compound were isolated by chromatography on SiO<sub>2</sub> with elution using PE-EtOAc mixture (2:1).

Presumably, the least polar compound isolated in trace amount (12.0 mg) is peroxide **2o** with purity ≈85-90%.

### 6-Butyl-6-hydroperoxy-1,2-dioxan-3-one, **2o**

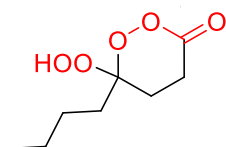

<sup>13</sup>C NMR (75.48 MHz, CDCl<sub>3</sub>, δ): 175.65, 111.30, 31.68, 27.99, 26.17, 25.32, 22.76, 13.93.

HRMS (ESI) m/z [M + Na]<sup>+</sup>. Calcd for [C<sub>8</sub>H<sub>14</sub>O<sub>5</sub>Na]<sup>+</sup>: 213.0733. Found: 213.0723.

### 4-Butoxy-4-oxobutanoic acid, **6o**<sup>10</sup>

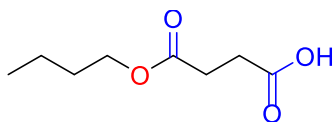

Yield 34% (59.2 mg, 0.34 mmol). Colorless oil. R<sub>f</sub> = 0.32 (PE:EtOAc = 5:1).

<sup>1</sup>H NMR (300.13 MHz, CDCl<sub>3</sub>, δ): 4.09 (t, J = 6.6 Hz, 2H), 2.75 – 2.53 (m, 4H), 1.60 (quintet, J = 6.8 Hz, 2H), 1.36 (sextet, J = 7.3 Hz, 2H), 0.92 (t, J = 7.3 Hz, 3H).

<sup>13</sup>C NMR (75.48 MHz, CDCl<sub>3</sub>, δ): 178.39, 172.34, 64.89, 30.72, 29.12, 29.05, 19.20, 13.76.

### Succinic acid, **7**<sup>11</sup>

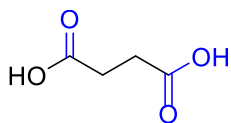

In the experiment with **1o** yield was 23% (27.1 mg, 0.23 mmol). In the experiment with **1p** yield was 36% (42.5 mg, 0.36 mmol). White solid, mp = 187 °C.

<sup>1</sup>H NMR (300.13 MHz, DMSO-*d*<sub>6</sub>, δ): 11.74 (s, 2H), 2.02 (s, 4H).

$^{13}\text{C}$  NMR (75.48 MHz, DMSO- $d_6$ ,  $\delta$ ): 173.71, 28.87.

## Phenol <sup>12</sup>

Yield 68% (64.0 mg, 0.68 mmol).

$^1\text{H}$  NMR (300.13 MHz,  $\text{CDCl}_3$ ,  $\delta$ ): 7.26 (t,  $J = 7.9$  Hz, 2H), 6.96 (t,  $J = 7.4$  Hz, 1H), 6.86 (d,  $J = 8.2$  Hz, 2H), 5.26 (s, 1H).

$^{13}\text{C}$  NMR (75.48 MHz,  $\text{CDCl}_3$ ,  $\delta$ ): 155.43, 129.84, 121.03, 115.47.

## Experimental procedures for Scheme 8.

### The reaction of 5-benzyl-6-hydroperoxy-6-methyl-1,2-dioxan-3-one (**2a**) with $\text{Ph}_3\text{P}$ during 5 min.

Solution of  $\text{Ph}_3\text{P}$  (288.5 mg, 1.10 mmol, 1.1 eq.) in  $\text{CH}_2\text{Cl}_2$  (2 mL) was added dropwise with stirring to solution of 5-benzyl-6-hydroperoxy-6-methyl-1,2-dioxan-3-one **2a** (238.2 mg, 1.00 mmol) in  $\text{CH}_2\text{Cl}_2$  (2 mL) at 0-10 °C. The reaction mixture was stirred at 20-25 °C for 5 min and transferred onto chromatographic column. Product **3a** was isolated by chromatography on  $\text{SiO}_2$  (PE:EtOAc = 3:1).

### 5-Benzyl-6-hydroxy-6-methyl-1,2-dioxan-3-one, **3a**

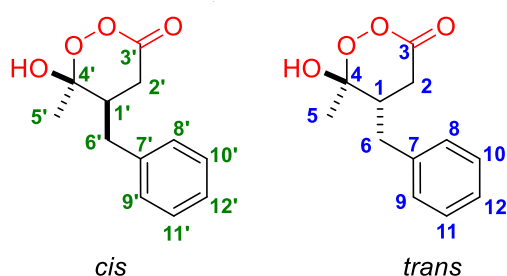

Yield 25% (55.6 mg, 0.25 mmol). White solid.  $R_f = 0.18$  (PE:EtOAc = 3:1).

Peroxide **3a** was obtained as an inseparable mixture of *cis* and *trans* isomers. Isomer ratio = 22:78 (*cis* : *trans*).

*cis*-isomer:

$^1\text{H}$  NMR (300.13 MHz,  $\text{CDCl}_3$ ,  $\delta$ ): 9.19 (br.s., 1H, OH'), 7.34 – 7.29 (m, 2H, H10', H11'), 7.25 – 7.21 (m, 1H, H12'), 7.16 (d,  $J = 7.3$  Hz, 2H, H8', H9'), 3.08 (dd,  $J = 13.1, 4.7$  Hz, 1H, H6'\_a), 3.02 – 2.96 (m, 1H, H1'), 2.78 – 2.70 (m, 1H, H2'\_a), 2.47 – 2.39 (m, 1H, H6'\_b), 2.30 (dd,  $J = 18.1, 5.0$  Hz, 1H, H2'\_b), 1.66 (s, 3H, H5').

$^{13}\text{C}$  NMR (75.48 MHz,  $\text{CDCl}_3$ ,  $\delta$ ): 176.16 (C3'), 137.97 (C7'), 129.04 ( $\text{C}_{\text{Ar}}$ '), 128.97 ( $\text{C}_{\text{Ar}}$ '), 127.01 (C12'), 115.19 (C4'), 42.22 (C1'), 36.55 (C6'), 35.02 (C2'), 18.21 (C5').

*trans*-isomer:

$^1\text{H}$  NMR (300.13 MHz,  $\text{CDCl}_3$ ,  $\delta$ ): 9.24 (br.s., 1H, OH), 7.34 – 7.29 (m, 2H, H10, H11), 7.25 – 7.20 (m, 3H, H8, H9, H12), 3.06 (dd,  $J = 13.9, 5.1$  Hz, 1H, H6\_a), 2.93 (dd,  $J = 13.9, 8.6$  Hz, 1H, H6\_b), 2.76 – 2.69 (m, 2H, H2\_a, H1), 2.55 – 2.47 (m, 1H, H2\_b\_a), 1.48 (s, 3H, H5).

$^{13}\text{C}$  NMR (75.48 MHz,  $\text{CDCl}_3$ ,  $\delta$ ): 176.88 (C3), 139.28 (C7), 128.85 ( $\text{C}_{\text{Ar}}$ ), 128.81 ( $\text{C}_{\text{Ar}}$ ), 126.74 (C12), 113.13 (C4), 47.16 (C1), 35.76 (C2), 34.44 (C6), 21.39 (C5).

HRMS (ESI)  $m/z$   $[\text{M} + \text{Na}]^+$ . Calcd for  $[\text{C}_{12}\text{H}_{14}\text{O}_4\text{Na}]^+$ : 245.0784. Found: 245.0783.

Anal. Calcd for C<sub>12</sub>H<sub>14</sub>O<sub>4</sub>: C, 64.85; H, 6.35. Found: C, 64.89; H, 6.38.

IR (KBr): 3253, 3026, 2931, 2855, 1775, 1450, 1380, 1271, 1084, 955, 699 cm<sup>-1</sup>.

### The reaction of 5-benzyl-6-hydroperoxy-6-methyl-1,2-dioxan-3-one (**2a**) with Ph<sub>3</sub>P during 1 day.

With 1.1 eq. Ph<sub>3</sub>P

Solution of Ph<sub>3</sub>P (288.5 mg, 1.10 mmol, 1.1 eq.) in CH<sub>2</sub>Cl<sub>2</sub> (2 mL) was added dropwise with stirring to solution of 5-benzyl-6-hydroperoxy-6-methyl-1,2-dioxan-3-one **2a** (238.2 mg, 1.00 mmol) in CH<sub>2</sub>Cl<sub>2</sub> (2 mL) at 0-10 °C. The reaction mixture was stirred at 20-25 °C for 1 day. The solution was concentrated under reduced pressure using a rotary evaporator (15-20 mmHg), (bath temperature, ca. 20–25 °C). 3-Benzyl-4-oxopentaneperoxoic acid (**4a**) and 3-benzyl-4-oxopentanoic acid (**5a**) were isolated by chromatography on SiO<sub>2</sub> (PE:EtOAc = 3:1) as an inseparable mixture. **4a** / **5a** ratio = 1:2. Total yield 79% (165 mg).

#### 3-Benzyl-4-oxopentaneperoxoic acid, **4a**

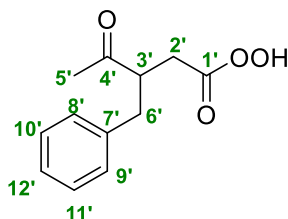

<sup>1</sup>H NMR (300.13 MHz, CDCl<sub>3</sub>, δ): 10.14 (br.s., 1H, OOH'), 7.36 – 7.20 (m, 3H, H10', H11', H12'), 7.19 – 7.14 (m, 2H, H8', H9'), 3.31 – 3.18 (m, 1H, H3'), 3.00 (dd, *J* = 13.1, 6.7 Hz, 1H, H6'<sub>a</sub>), 2.79 (dd, *J* = 17.1, 9.8 Hz, 1H, H2'<sub>a</sub>), 2.66 (dd, *J* = 13.1, 8.3 Hz, 1H, H6'<sub>b</sub>), 2.38 (dd, *J* = 17.1, 4.0 Hz, 1H, H2'<sub>b</sub>), 2.15 (s, 3H, H5).

<sup>13</sup>C NMR (75.48 MHz, CDCl<sub>3</sub>, δ): 210.02 (C4'), 172.91 (C1'), 137.52 (C7'), 128.94 (C8', C9'), 128.81 (C10', C11'), 127.14 (C12'), 49.55 (C3'), 37.58 (C6'), 31.24 (C2'), 30.02 (C5').

#### 3-Benzyl-4-oxopentanoic acid, **5a**<sup>13</sup>

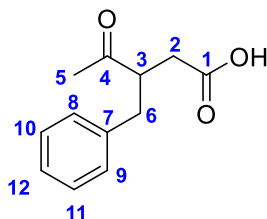

<sup>1</sup>H NMR (300.13 MHz, CDCl<sub>3</sub>, δ): 10.14 (br.s., 1H, OH), 7.36 – 7.20 (m, 3H, H10, H11, H12), 7.19 – 7.14 (m, 2H, H8, H9), 3.31 – 3.18 (m, 1H, H3), 2.94 (dd, *J* = 13.5, 6.8 Hz, 1H, H6<sub>a</sub>), 2.80 (dd, *J* = 17.5, 10.0 Hz, 1H, H2<sub>a</sub>), 2.62 (dd, *J* = 13.5, 8.3 Hz, 1H, H6<sub>b</sub>), 2.38 (dd, *J* = 17.5, 3.9 Hz, 1H, H2<sub>b</sub>), 2.11 (s, 3H, H5).

<sup>13</sup>C NMR (75.48 MHz, CDCl<sub>3</sub>, δ): 211.01 (C4), 178.06 (C1), 138.09 (C7), 128.96 (C8, C9), 128.81 (C10, C11), 126.91 (C12), 49.57 (C3), 37.63 (C6), 34.98 (C2), 30.25 (C5).

With 2.0 eq.  $\text{Ph}_3\text{P}$

Solution of  $\text{Ph}_3\text{P}$  (524.6 mg, 2.00 mmol, 2.0 eq.) in  $\text{CH}_2\text{Cl}_2$  (2 mL) was added dropwise with stirring to solution of 5-benzyl-6-hydroperoxy-6-methyl-1,2-dioxan-3-one **2a** (238.2 mg, 1.00 mmol) in  $\text{CH}_2\text{Cl}_2$  (2 mL) at 0-10 °C. The reaction mixture was stirred at 20-25 °C for 1 day. Later,  $\text{Et}_2\text{O}$  (15 mL) was added and precipitate of  $\text{Ph}_3\text{PO}$  was filtered. A solution was washed with 5% aq. NaOH (3×10 mL). The combined aqueous layers were acidified by diluted aq. HCl (10 mL). The products were extracted by  $\text{Et}_2\text{O}$  (3×15 mL). The combined organic layers were dried over  $\text{MgSO}_4$ , filtered and concentrated under reduced pressure using a rotary evaporator (15-20 mmHg), (bath temperature, ca. 30–35 °C).

### 3-Benzyl-4-oxopentanoic acid, **5a**<sup>13</sup>

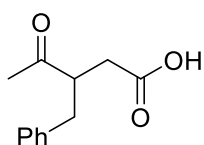

Yield 68% (140.2 mg, 0.68 mmol). White solid. mp = 95-96 °C (lit.<sup>14</sup> 96-97 °C).  $R_f$  = 0.23 (PE:EtOAc = 3:1).

$^1\text{H}$  NMR (300.13 MHz,  $\text{CDCl}_3$ ,  $\delta$ ): 7.36 – 7.20 (m, 3H), 7.16 (d,  $J$  = 7.1 Hz, 2H), 3.31 – 3.18 (m, 1H), 2.94 (dd,  $J$  = 13.5, 6.8 Hz, 1H), 2.80 (dd,  $J$  = 17.5, 10.0 Hz, 1H), 2.62 (dd,  $J$  = 13.5, 8.3 Hz, 1H), 2.37 (dd,  $J$  = 17.5, 3.9 Hz, 1H), 2.11 (s, 3H).

$^{13}\text{C}$  NMR (75.48 MHz,  $\text{CDCl}_3$ ,  $\delta$ ): 210.69, 178.18, 138.14, 129.01, 128.87, 126.97, 49.60, 37.71, 35.02, 30.29.

## Computational Details

Calculations were carried out using the M06-2X functional with the 6-311++G(d,p) basis set for all atoms. The SMD solvation model was used to simulate water. Grimme's D3 method was used to simulate empirical dispersion. Additionally, an ultrafine (99,590) grid was used for all structure optimizations. Frequency calculations were performed on all structures to confirm that they were either a minimum or a transition state. All calculations were performed using Gaussian 09 software.<sup>15</sup> Visualization of all three-dimensional structures and orbital plots was achieved using CYLView Beta v1.0.565<sup>16</sup> and IQmol v2.14.0.<sup>17</sup>

### Calculations:

#### Cis Boat

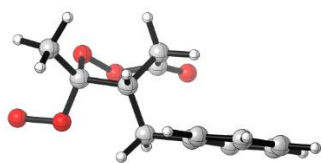

# Imaginary Frequencies = 0

E = -841.58451840

0,1

|   |                 |                 |                 |
|---|-----------------|-----------------|-----------------|
| O | -2.946490602796 | 0.451911536992  | 0.282900535553  |
| O | -2.853173281628 | 1.282606109764  | -0.867535375214 |
| O | -2.196030596076 | -1.474984621699 | -0.761327318615 |
| O | -3.419097932920 | -2.143688253158 | -0.509027108188 |
| H | -4.069288289981 | -1.578305349736 | -0.954691185096 |
| O | -1.655864997209 | 2.968083592937  | -1.607234167490 |
| C | -1.925944180232 | -0.555672696994 | 0.274286450080  |
| C | -0.543267125070 | 0.077167755914  | -0.025172538508 |
| C | -0.698150349943 | 1.597660875447  | 0.162031508401  |
| H | -1.042063271316 | 1.824851296459  | 1.174129957520  |
| H | 0.230913038453  | 2.131925915177  | -0.025651553395 |
| C | -1.722785561226 | 2.069650617273  | -0.816488183638 |
| C | -2.015607140060 | -1.158002646525 | 1.659886712657  |
| H | -3.040003636374 | -1.430857949199 | 1.907636052281  |
| H | -1.647005274646 | -0.433619514869 | 2.387151929329  |
| H | -1.383130693054 | -2.046289729852 | 1.687418142918  |
| C | 0.035659829834  | -0.271430889830 | -1.411871271565 |
| H | 0.113063476391  | -1.356643582286 | -1.494649171174 |
| H | -0.637028734904 | 0.069135402311  | -2.204370016701 |
| C | 1.400820628261  | 0.341801898302  | -1.607638490610 |

|   |                |                 |                 |
|---|----------------|-----------------|-----------------|
| C | 1.583110006398 | 1.436852120600  | -2.453532400182 |
| C | 2.505088324942 | -0.166231555780 | -0.917869274974 |
| C | 2.842219736571 | 2.013323970328  | -2.609634572174 |
| H | 0.731226481926 | 1.839200213725  | -2.992955505424 |
| C | 3.763579760776 | 0.406973863887  | -1.070577269295 |
| H | 2.374922566647 | -1.020382654900 | -0.259923468713 |
| C | 3.935459754191 | 1.500559243655  | -1.917555980069 |
| H | 2.967494611012 | 2.862285246341  | -3.272072376050 |
| H | 4.611169321963 | -0.001273353755 | -0.531930236849 |
| H | 4.915704526358 | 1.946820933520  | -2.038613999764 |
| H | 0.150979423713 | -0.288600514047 | 0.732891844950  |

1 7 1.000

2 12 1.000

3 4 0.100 7 1.000

4 3 0.100 5 1.000

5 4 1.000

6 12 2.000

7 1 1.000 3 1.000 8 1.000 13 1.000

8 7 1.000 9 1.000 17 1.000 31 1.000

9 8 1.000 10 1.000 11 1.000 12 1.000

10 9 1.000

11 9 1.000

12 2 1.000 6 2.000 9 1.000

13 7 1.000 14 1.000 15 1.000 16 1.000

14 13 1.000

15 13 1.000

16 13 1.000

17 8 1.000 18 1.000 19 1.000 20 1.000

18 17 1.000

19 17 1.000

20 17 1.000 21 1.500 22 1.500

21 20 1.500 23 1.500 24 1.000

22 20 1.500 25 1.500 26 1.000

23 21 1.500 27 1.500 28 1.000

24 21 1.000

25 22 1.500 27 1.500 29 1.000

26 22 1.000



27 23 1.500 25 1.500 30 1.000  
28 23 1.000  
29 25 1.000  
30 27 1.000  
31 8 1.000

### Trans Boat

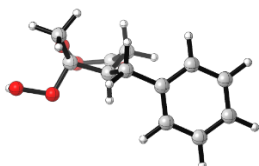

# Imaginary Frequencies = 0

E = -841.58571030

0,1

|   |                 |                 |                 |
|---|-----------------|-----------------|-----------------|
| O | -0.175409868967 | -0.484508941813 | -0.901009005230 |
| O | 0.970317433192  | -1.079729039466 | -0.306130624342 |
| O | -1.463243154402 | -0.351367286205 | 1.034468119462  |
| O | -2.512713539191 | -1.146917581288 | 0.511307453399  |
| H | -2.063360715725 | -1.977486552098 | 0.289700416152  |
| O | 3.054890049713  | -0.568336802573 | 0.155041997890  |
| C | -0.849495430790 | 0.399037799396  | 0.006828886006  |
| C | 0.171107278230  | 1.283128714493  | 0.747423560363  |
| H | 0.367824374611  | 0.798712775955  | 1.709851739679  |
| C | 1.475549308460  | 1.267602144216  | -0.062551460858 |
| H | 1.298430868421  | 1.615338487467  | -1.085073507190 |
| H | 2.250109553917  | 1.880471067385  | 0.394879493864  |
| C | 1.960245732490  | -0.144565231473 | -0.086530954232 |
| C | -1.829153423155 | 1.115786539046  | -0.897292955323 |
| H | -2.369089513915 | 0.399129039038  | -1.514002806613 |
| H | -1.285709883985 | 1.805579673422  | -1.543566870505 |
| H | -2.540301722532 | 1.672954194335  | -0.287619741636 |
| C | -0.338753979261 | 2.702437807448  | 1.030289157908  |
| H | -1.317280789795 | 2.627130566740  | 1.512649364985  |
| H | -0.466796410250 | 3.244276405917  | 0.090466180421  |
| C | 0.607735204855  | 3.459249656476  | 1.929821917924  |
| C | 1.452264576207  | 4.445353960695  | 1.418217542313  |
| C | 0.674453955358  | 3.157733958381  | 3.292936177320  |
| C | 2.345457235058  | 5.118607125297  | 2.249507304939  |
| H | 1.408719475167  | 4.686237547271  | 0.360642195798  |

|   |                |                |                |
|---|----------------|----------------|----------------|
| C | 1.564442124115 | 3.827701402682 | 4.126180002229 |
| H | 0.019688974810 | 2.393575831287 | 3.701242752456 |
| C | 2.404300732314 | 4.810738930297 | 3.605424420144 |
| H | 2.993974639258 | 5.883070030536 | 1.836943522881 |
| H | 1.601571309153 | 3.585469711097 | 5.182173340497 |
| H | 3.097062676639 | 5.334386546041 | 4.253933189300 |

1 7 1.000  
 2 13 1.000  
 3 4 0.100 7 1.000  
 4 3 0.100 5 1.000  
 5 4 1.000  
 6 13 2.000  
 7 1 1.000 3 1.000 8 1.000 14 1.000  
 8 7 1.000 9 1.000 10 1.000 18 1.000  
 9 8 1.000  
 10 8 1.000 11 1.000 12 1.000 13 1.000  
 11 10 1.000  
 12 10 1.000  
 13 2 1.000 6 2.000 10 1.000  
 14 7 1.000 15 1.000 16 1.000 17 1.000  
 15 14 1.000  
 16 14 1.000  
 17 14 1.000  
 18 8 1.000 19 1.000 20 1.000 21 1.000  
 19 18 1.000  
 20 18 1.000  
 21 18 1.000 22 1.500 23 1.500  
 22 21 1.500 24 1.500 25 1.000  
 23 21 1.500 26 1.500 27 1.000  
 24 22 1.500 28 1.500 29 1.000  
 25 22 1.000  
 26 23 1.500 28 1.500 30 1.000  
 27 23 1.000  
 28 24 1.500 26 1.500 31 1.000  
 29 24 1.000  
 30 26 1.000  
 31 28 1.000

## Cis Chair

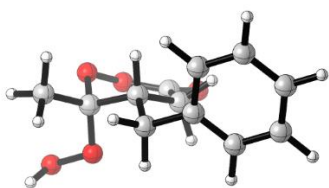

# Imaginary Frequencies = 0

E = -841.58130486

0,1

|   |                 |                 |                 |
|---|-----------------|-----------------|-----------------|
| O | -2.916004945745 | -0.662330671267 | -0.127259615286 |
| C | -1.822968760978 | -0.174958326766 | -0.009149343085 |
| O | 0.232741599839  | -0.207052805397 | 1.217667140133  |
| O | -0.985431413284 | -0.844936416678 | 0.842730539016  |
| C | 0.912748684850  | 0.400642226223  | 0.111411572608  |
| C | 0.046927144726  | 1.546397723306  | -0.399667928843 |
| H | -0.066954626304 | 2.210474930288  | 0.461566363949  |
| C | -1.325611567086 | 1.000238493028  | -0.791696686246 |
| H | -2.096086026440 | 1.770599414854  | -0.731668089112 |
| H | -1.316093337199 | 0.645373010223  | -1.829126453324 |
| C | 2.248318179104  | 0.813865173061  | 0.688604131761  |
| H | 2.706266241250  | -0.016741113660 | 1.224232347346  |
| H | 2.905062715871  | 1.118536049010  | -0.126984041686 |
| H | 2.110998128726  | 1.652944058893  | 1.370682017553  |
| O | 1.007871800352  | -0.519838800998 | -0.952789662323 |
| O | 1.734387919059  | -1.666287185196 | -0.545466407217 |
| H | 2.622802662103  | -1.496182146528 | -0.895824966448 |
| C | 0.686468284451  | 2.335837049033  | -1.550181264463 |
| H | 1.655577675873  | 2.719151012162  | -1.222091677867 |
| H | 0.853994721422  | 1.669129893867  | -2.399607609393 |
| C | -0.191963644151 | 3.488880260229  | -1.972049561262 |
| C | -0.927601437398 | 3.438648792928  | -3.156646243428 |
| C | -0.312007232318 | 4.615128373808  | -1.152859809151 |
| C | -1.765511201770 | 4.492020403134  | -3.518787887445 |
| H | -0.841564990837 | 2.568389268314  | -3.799584998397 |
| C | -1.147603066026 | 5.668148121810  | -1.510632364706 |
| H | 0.257234530784  | 4.664587653197  | -0.229309877720 |
| C | -1.878404311481 | 5.608750068764  | -2.696258171285 |
| H | -2.328853773026 | 4.438779881243  | -4.443471243287 |

|   |                 |                |                 |
|---|-----------------|----------------|-----------------|
| H | -1.227371058090 | 6.536598287359 | -0.866634420747 |
| H | -2.528819286275 | 6.429078531756 | -2.976813509643 |

1 2 2.000

2 1 2.000 4 1.000 8 1.000

3 5 1.000

4 2 1.000

5 3 1.000 6 1.000 11 1.000 15 1.000

6 5 1.000 7 1.000 8 1.000 18 1.000

7 6 1.000

8 2 1.000 6 1.000 9 1.000 10 1.000

9 8 1.000

10 8 1.000

11 5 1.000 12 1.000 13 1.000 14 1.000

12 11 1.000

13 11 1.000

14 11 1.000

15 5 1.000 16 0.100

16 15 0.100 17 1.000

17 16 1.000

18 6 1.000 19 1.000 20 1.000 21 1.000

19 18 1.000

20 18 1.000

21 18 1.000 22 1.500 23 1.500

22 21 1.500 24 1.500 25 1.000

23 21 1.500 26 1.500 27 1.000

24 22 1.500 28 1.500 29 1.000

25 22 1.000

26 23 1.500 28 1.500 30 1.000

27 23 1.000

28 24 1.500 26 1.500 31 1.000

29 24 1.000

30 26 1.000

31 28 1.000

Trans Chair

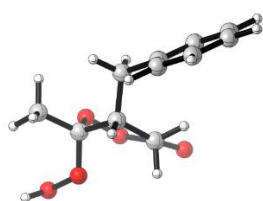

# Imaginary Frequencies = 0

E = -841.57987115

0,1

|   |                 |                 |                 |
|---|-----------------|-----------------|-----------------|
| O | -2.760492606888 | -1.049043955937 | 0.507882118477  |
| C | -1.707919744967 | -0.475763723901 | 0.408253226061  |
| O | 0.551262260001  | -0.358514465220 | 1.222342025972  |
| O | -0.659871098000 | -1.092444258884 | 1.042482530227  |
| C | 0.924690860643  | 0.413967994574  | 0.081194018188  |
| C | -0.149934839865 | 1.464686542399  | -0.194948224500 |
| H | 0.132337950971  | 1.998977734262  | -1.104837597803 |
| C | -1.470948056298 | 0.734723647634  | -0.439793176746 |
| H | -2.332449375502 | 1.390622666306  | -0.307666088001 |
| H | -1.520074801047 | 0.351705567833  | -1.463398760044 |
| C | 2.296454559310  | 0.946756442279  | 0.429311542205  |
| H | 3.020869451310  | 0.133587170265  | 0.446022828183  |
| H | 2.583303606225  | 1.680506268493  | -0.325681606877 |
| H | 2.286108366086  | 1.425223855869  | 1.407269451414  |
| O | 0.919429912660  | -0.403582623324 | -1.075038626734 |
| O | 1.770045106053  | -1.522211157710 | -0.898347566797 |
| H | 2.567984421497  | -1.267995032744 | -1.387076798948 |
| C | -0.254959264736 | 2.468862142296  | 0.967236412390  |
| H | 0.717197312444  | 2.942238462887  | 1.118604806991  |
| H | -0.516317109682 | 1.934914218391  | 1.885459615090  |
| C | -1.280416048314 | 3.542045302711  | 0.692903200388  |
| C | -2.491255645659 | 3.577308043618  | 1.385612831755  |
| C | -1.036606901974 | 4.512196836242  | -0.283555012178 |
| C | -3.439907117082 | 4.561048840534  | 1.111966948400  |
| H | -2.691206444595 | 2.827415723011  | 2.144619106214  |
| C | -1.981461409525 | 5.494665029341  | -0.560933931513 |
| H | -0.096315626896 | 4.496385530924  | -0.826647341846 |
| C | -3.187988950810 | 5.521236074051  | 0.136855578144  |
| H | -4.375020853330 | 4.575014517550  | 1.660198160974  |
| H | -1.776372351832 | 6.241567072224  | -1.319420203025 |
| H | -3.924308130200 | 6.287048984024  | -0.077689586062 |

1 2 2.000  
2 1 2.000 4 1.000 8 1.000  
3 5 1.000  
4 2 1.000  
5 3 1.000 6 1.000 11 1.000 15 1.000  
6 5 1.000 7 1.000 8 1.000 18 1.000  
7 6 1.000  
8 2 1.000 6 1.000 9 1.000 10 1.000  
9 8 1.000  
10 8 1.000  
11 5 1.000 12 1.000 13 1.000 14 1.000  
12 11 1.000  
13 11 1.000  
14 11 1.000  
15 5 1.000 16 0.100  
16 15 0.100 17 1.000  
17 16 1.000  
18 6 1.000 19 1.000 20 1.000 21 1.000  
19 18 1.000  
20 18 1.000  
21 18 1.000 22 1.500 23 1.500  
22 21 1.500 24 1.500 25 1.000  
23 21 1.500 26 1.500 27 1.000  
24 22 1.500 28 1.500 29 1.000  
25 22 1.000  
26 23 1.500 28 1.500 30 1.000  
27 23 1.000  
28 24 1.500 26 1.500 31 1.000  
29 24 1.000  
30 26 1.000  
31 28 1.000

OH Chair R = Me Reactant

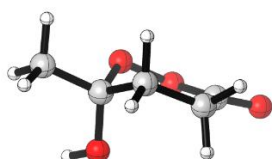

# Imaginary Frequencies = 0

E = -496.13643327

0,1

|   |                 |                 |                 |
|---|-----------------|-----------------|-----------------|
| O | 2.840055567029  | -0.241894590534 | 0.062792448377  |
| C | 1.658546920234  | -0.052821025971 | -0.070771823015 |
| O | -0.454982408378 | -1.064827701662 | -0.590732075247 |
| O | 0.904701321570  | -1.191045390113 | -0.171981941044 |
| C | -1.141332946115 | 0.034926972601  | 0.052031131031  |
| C | -0.474147535127 | 1.313972116346  | -0.400730664671 |
| H | -0.587947706955 | 1.380399441937  | -1.483210800585 |
| H | -0.971646991548 | 2.170931064484  | 0.053346342868  |
| C | 0.998265046621  | 1.290076410599  | -0.010331507570 |
| H | 1.597662129620  | 1.968215617138  | -0.617881672540 |
| H | 1.129377107641  | 1.597538902789  | 1.031867728272  |
| C | -2.567680000391 | -0.124967505661 | -0.423318224730 |
| H | -2.979203061030 | -1.069421207318 | -0.061845243795 |
| H | -3.155500212449 | 0.701222267102  | -0.021484831562 |
| H | -2.614810060904 | -0.099843282052 | -1.512075562483 |
| O | -1.008729576074 | -0.071477554906 | 1.440304933589  |
| H | -1.499873593744 | -0.847794534778 | 1.741949763104  |

1 2 2.000

2 1 2.000 4 1.000 9 1.000

3 5 1.000

4 2 1.000

5 3 1.000 6 1.000 12 1.000 16 1.000

6 5 1.000 7 1.000 8 1.000 9 1.000

7 6 1.000

8 6 1.000

9 2 1.000 6 1.000 10 1.000 11 1.000

10 9 1.000

11 9 1.000

12 5 1.000 13 1.000 14 1.000 15 1.000

13 12 1.000

14 12 1.000

15 12 1.000

16 5 1.000 17 1.000

17 16 1.000

### OH Chair R = Me Transition State

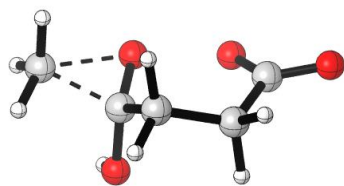

# Imaginary Frequencies = 1

E = -496.08321742

0,1

|   |                 |                 |                 |
|---|-----------------|-----------------|-----------------|
| O | 3.024151696487  | -0.186904825180 | -0.165216858155 |
| C | 1.791654160220  | -0.180657777059 | -0.054328031599 |
| O | -0.765793707691 | -1.125052682501 | -0.196604172653 |
| O | 1.133795396516  | -1.261050451010 | 0.178199041404  |
| C | -1.096679738617 | 0.078973321339  | 0.120267912476  |
| C | -0.376208159051 | 1.175728619293  | -0.611571874536 |
| H | -0.418638148994 | 0.968031364388  | -1.680162016306 |
| H | -0.848689777174 | 2.134644846877  | -0.403916593977 |
| C | 1.071638905993  | 1.163547875602  | -0.106730991505 |
| H | 1.672861316321  | 1.825006153279  | -0.729046694062 |
| H | 1.104685370410  | 1.548453646773  | 0.917188830063  |
| C | -2.557432710427 | -0.405388593831 | -0.693421949103 |
| H | -3.042768100551 | -1.220612742289 | -0.169023758330 |
| H | -3.026673380449 | 0.558912855329  | -0.474820609997 |
| H | -2.387258732366 | -0.564966335675 | -1.750184382653 |
| O | -1.332600482677 | 0.367808422610  | 1.422256681182  |
| H | -1.585968187952 | -0.436535347946 | 1.901777597750  |

1 2 2.000

2 1 2.000 4 2.000 9 1.000

3 5 2.000

4 2 2.000

5 3 2.000 6 1.000 12 0.100 16 1.000

6 5 1.000 7 1.000 8 1.000 9 1.000

7 6 1.000

8 6 1.000

9 2 1.000 6 1.000 10 1.000 11 1.000

10 9 1.000

11 9 1.000

12 5 0.100 13 1.000 14 1.000 15 1.000



13 12 1.000  
14 12 1.000  
15 12 1.000  
16 5 1.000 17 1.000  
17 16 1.000

OH R = Me Product

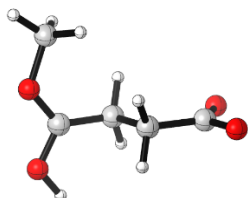

# Imaginary Frequencies = 0

E = -496.20176181

0,1

|   |                 |                 |                 |
|---|-----------------|-----------------|-----------------|
| O | -2.463641733966 | 0.266112196926  | 1.177505257970  |
| O | 1.927879795033  | -1.726685405381 | -0.122264266147 |
| H | 1.278211782839  | -2.399273689154 | 0.148028442379  |
| C | 2.095461384475  | 1.772267509597  | -0.061185253083 |
| H | 2.943543806263  | 2.266819232727  | -0.521572147191 |
| H | 1.169346788864  | 2.035532622590  | -0.566626334483 |
| H | 2.053996002468  | 1.980572938457  | 1.005441811821  |
| C | -2.259702852897 | 0.076981335579  | -0.044226165638 |
| O | 2.364114303219  | 0.351687486111  | -0.247762529228 |
| O | -3.130136011219 | 0.098076987650  | -0.950877172243 |
| C | 1.518778836160  | -0.530036761220 | 0.102563794880  |
| C | 0.174661511648  | -0.247661639840 | 0.652553405240  |
| H | -0.084712422151 | -1.051531476846 | 1.342241169474  |
| H | 0.180291478411  | 0.697690143158  | 1.191499576654  |
| C | -0.827607862650 | -0.209029477629 | -0.515884325344 |
| H | -0.551005284306 | 0.562717863272  | -1.238260115006 |
| H | -0.828387522191 | -1.164363865996 | -1.045288150057 |

1 8 2.000

2 3 1.000 11 2.000

3 2 1.000

4 5 1.000 6 1.000 7 1.000 9 1.000

5 4 1.000

6 4 1.000

7 4 1.000  
 8 1 2.000 10 2.000 15 1.000  
 9 4 1.000 11 2.000  
 10 8 2.000  
 11 2 2.000 9 2.000 12 1.000  
 12 11 1.000 13 1.000 14 1.000 15 1.000  
 13 12 1.000  
 14 12 1.000  
 15 8 1.000 12 1.000 16 1.000 17 1.000  
 16 15 1.000  
 17 15 1.000

OH Boat R = Me Reactant

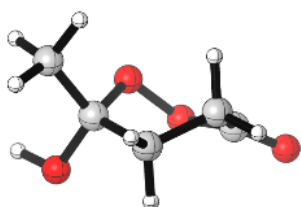

# Imaginary Frequencies = 0

E = -496.14031146

0,1

|   |                 |                 |                 |
|---|-----------------|-----------------|-----------------|
| O | -0.355725770154 | -0.743155108207 | -0.884731765887 |
| O | 0.895597133182  | -1.115251670430 | -0.319982780213 |
| O | -1.592678749946 | -0.903315986220 | 1.083335965189  |
| O | 2.849368060726  | -0.226040929393 | 0.136222095727  |
| C | -1.166461462230 | -0.027214626006 | 0.078753468776  |
| C | -0.320770841828 | 1.072991307261  | 0.723984340926  |
| H | -0.060105521050 | 0.771311625200  | 1.739694336678  |
| H | -0.895677702461 | 1.996350048331  | 0.779291440819  |
| C | 0.957570232276  | 1.285862230987  | -0.092728691624 |
| H | 0.719249411381  | 1.567477597876  | -1.122028643567 |
| H | 1.607747683975  | 2.041529259363  | 0.341797094200  |
| C | 1.692791484624  | -0.013592857266 | -0.103133685409 |
| C | -2.307002463463 | 0.487122329115  | -0.774236750289 |
| H | -2.802957680997 | -0.342464976155 | -1.282925777400 |
| H | -1.935463329438 | 1.197737258608  | -1.513479242470 |
| H | -3.023025867338 | 0.989098327176  | -0.122826645676 |
| H | -2.252057127259 | -1.505086550243 | 0.711691580221  |

1 5 1.000  
 2 12 1.000  
 3 5 1.000 17 1.000  
 4 12 2.000  
 5 1 1.000 3 1.000 6 1.000 13 1.000  
 6 5 1.000 7 1.000 8 1.000 9 1.000  
 7 6 1.000  
 8 6 1.000  
 9 6 1.000 10 1.000 11 1.000 12 1.000  
 10 9 1.000  
 11 9 1.000  
 12 2 1.000 4 2.000 9 1.000  
 13 5 1.000 14 1.000 15 1.000 16 1.000  
 14 13 1.000  
 15 13 1.000  
 16 13 1.000  
 17 3 1.000

OH Boat R = Me Transition State

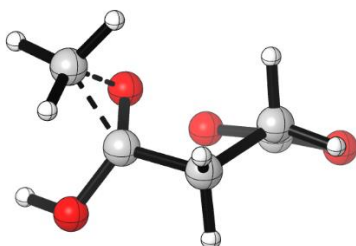

# Imaginary Frequencies = 1

E = -496.08139542

0,1

|   |                 |                 |                 |
|---|-----------------|-----------------|-----------------|
| O | -0.662614101614 | -0.726190384457 | -0.801754453830 |
| O | 1.126898706755  | -1.224621281388 | -0.264863834608 |
| O | -1.663292876929 | -0.753568038444 | 1.239625152259  |
| O | 2.995075431369  | -0.097495911514 | 0.064433642465  |
| C | -1.116166159912 | -0.067413959970 | 0.210563466270  |
| C | -0.319148496462 | 1.150238322705  | 0.646952472252  |
| H | -0.129321038185 | 1.032321727478  | 1.714901876659  |
| H | -0.895717547202 | 2.063034714332  | 0.502734107609  |
| C | 0.987965562463  | 1.190151450434  | -0.143818173387 |
| H | 0.782872073314  | 1.415408798591  | -1.194697535871 |
| H | 1.632537802639  | 1.973612966781  | 0.250689686622  |

|   |                 |                 |                 |
|---|-----------------|-----------------|-----------------|
| C | 1.771293128857  | -0.118101817881 | -0.105907678378 |
| C | -2.308295554949 | 0.352344574414  | -0.998057267098 |
| H | -2.782526656531 | -0.508013503926 | -1.457662388328 |
| H | -1.876644835168 | 1.066271944782  | -1.688266942476 |
| H | -2.950810313573 | 0.806640473854  | -0.238980019619 |
| H | -2.031315194872 | -1.593813475793 | 0.922394539456  |

1 5 1.500  
 2 12 1.500  
 3 5 1.000 17 1.000  
 4 12 2.000  
 5 1 1.500 3 1.000 6 1.000 13 0.100  
 6 5 1.000 7 1.000 8 1.000 9 1.000  
 7 6 1.000  
 8 6 1.000  
 9 6 1.000 10 1.000 11 1.000 12 1.000  
 10 9 1.000  
 11 9 1.000  
 12 2 1.500 4 2.000 9 1.000  
 13 5 0.100 14 1.000 15 1.000 16 1.000  
 14 13 1.000  
 15 13 1.000  
 16 13 1.000  
 17 3 1.000

OH Chair R = Et Reactant

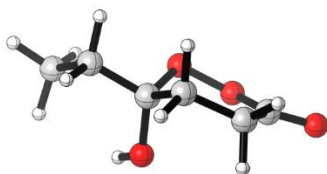

# Imaginary Frequencies = 0

E = -535.43901143

0,1

|   |                 |                 |                 |
|---|-----------------|-----------------|-----------------|
| O | 3.099687669797  | -0.653718926005 | 0.148666747911  |
| C | 1.974121397200  | -0.264382043001 | -0.026724831847 |
| O | -0.260568001115 | -0.893318439433 | -0.611393243000 |
| O | 1.035160876068  | -1.254523886997 | -0.134683408632 |
| C | -0.769792983402 | 0.310692791304  | 0.007907954124  |

|   |                 |                 |                 |
|---|-----------------|-----------------|-----------------|
| C | 0.120083601502  | 1.453077047882  | -0.427231735979 |
| H | 0.041664532382  | 1.538211888634  | -1.511569842060 |
| H | -0.229161983710 | 2.383966703961  | 0.019593076415  |
| C | 1.558499342290  | 1.174714302189  | -0.007188999884 |
| H | 2.279259390520  | 1.722772479610  | -0.614224736631 |
| H | 1.724896019494  | 1.477286574827  | 1.031322008855  |
| C | -2.191727704314 | 0.411434146840  | -0.529454236529 |
| H | -2.135330161799 | 0.409575691368  | -1.620338406976 |
| H | -2.560625847606 | 1.394335770778  | -0.225329868376 |
| O | -0.692480419244 | 0.196755305428  | 1.399630811220  |
| C | -3.130233903129 | -0.686374095429 | -0.038144582956 |
| H | -3.271451653244 | -0.646338755380 | 1.044855662233  |
| H | -4.112731108700 | -0.557763284297 | -0.494467373591 |
| H | -2.763142432987 | -1.678923944671 | -0.304990661384 |
| H | -1.276256960003 | -0.515084297609 | 1.694961097087  |

1 2 2.000

2 1 2.000 4 1.000 9 1.000

3 5 1.000

4 2 1.000

5 3 1.000 6 1.000 12 1.000 15 1.000

6 5 1.000 7 1.000 8 1.000 9 1.000

7 6 1.000

8 6 1.000

9 2 1.000 6 1.000 10 1.000 11 1.000

10 9 1.000

11 9 1.000

12 5 1.000 13 1.000 14 1.000 16 1.000

13 12 1.000

14 12 1.000

15 5 1.000 20 1.000

16 12 1.000 17 1.000 18 1.000 19 1.000

17 16 1.000

18 16 1.000

19 16 1.000

20 15 1.000

OH Chair R = Et Transition State

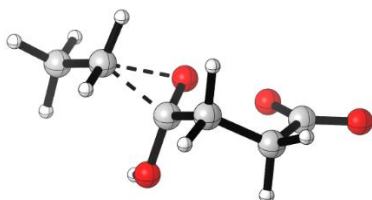

# Imaginary Frequencies = 1

E = -535.3914918

0,1

|   |                 |                 |                 |
|---|-----------------|-----------------|-----------------|
| O | 3.062083452528  | -0.081072725363 | -0.155277356776 |
| C | 1.832051344796  | -0.110255317187 | -0.037157567756 |
| O | -0.663818735729 | -1.124063236202 | -0.216395891283 |
| O | 1.209665394101  | -1.220456844081 | 0.165283400657  |
| C | -1.058848142984 | 0.041408295674  | 0.144593247791  |
| C | -0.378904812303 | 1.202357624494  | -0.528726272443 |
| H | -0.423975436779 | 1.052782409471  | -1.607136366019 |
| H | -0.879759584346 | 2.133334205295  | -0.266365619518 |
| C | 1.071928506038  | 1.211571856685  | -0.035272468849 |
| H | 1.652986222442  | 1.913083390252  | -0.632493084218 |
| H | 1.101601023226  | 1.554365631827  | 1.003780640981  |
| C | -2.558186795129 | -0.372120921482 | -0.723653889633 |
| H | -2.935972128690 | 0.640433828266  | -0.552599864086 |
| H | -2.291803479397 | -0.526261646157 | -1.763324620177 |
| O | -1.307783754280 | 0.269707199462  | 1.462895645964  |
| H | -1.469147643171 | -0.569353603023 | 1.920711124675  |
| C | -3.391466780175 | -1.440716898886 | -0.086892680467 |
| H | -3.003036700105 | -2.438425213365 | -0.282091262304 |
| H | -3.498790983834 | -1.285588009807 | 0.987693755427  |
| H | -4.390154866209 | -1.365454415873 | -0.528792041964 |

1 2 2.000

2 1 2.000 4 2.000 9 1.000

3 5 1.500

4 2 2.000

5 3 1.500 6 1.000 12 0.100 15 1.000

6 5 1.000 7 1.000 8 1.000 9 1.000

7 6 1.000

8 6 1.000

9 2 1.000 6 1.000 10 1.000 11 1.000

10 9 1.000

11 9 1.000  
 12 5 0.100 13 1.000 14 1.000 17 1.000  
 13 12 1.000  
 14 12 1.000  
 15 5 1.000 16 1.000  
 16 15 1.000  
 17 12 1.000 18 1.000 19 1.000 20 1.000  
 18 17 1.000  
 19 17 1.000  
 20 17 1.000

OH R = Et Product

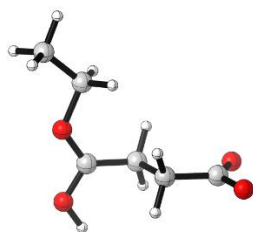

# Imaginary Frequencies = 0

E = -535.51098623

0,1

|   |                 |                 |                 |
|---|-----------------|-----------------|-----------------|
| O | 2.877566304203  | -0.901199293656 | 1.138225396270  |
| O | -0.333925984220 | 2.767650047646  | 0.039525953469  |
| H | 0.525345905766  | 3.106691722846  | 0.346674040548  |
| C | -1.888588391641 | -0.389073339124 | -0.164074761388 |
| C | 2.805226075123  | -0.529568567817 | -0.056158827064 |
| O | -1.558258947439 | 1.047628898778  | -0.226544038231 |
| O | 3.628923068723  | -0.800813411929 | -0.966278648158 |
| C | -0.439760917783 | 1.492637231009  | 0.174589364001  |
| C | 0.673861731259  | 0.664786674640  | 0.688234347242  |
| H | 1.207018278409  | 1.247960777147  | 1.440160357143  |
| H | 0.287890103469  | -0.243630815260 | 1.145343243753  |
| C | 1.612086043959  | 0.333406177290  | -0.486956190360 |
| H | 1.074622784525  | -0.207006376888 | -1.270157712386 |
| H | 1.999954871796  | 1.251448881077  | -0.933704979484 |
| C | -3.242022273074 | -0.539428665572 | -0.800629383893 |
| H | -3.520688500962 | -1.593832214105 | -0.765727725439 |
| H | -3.991581578891 | 0.037027404463  | -0.257478722427 |
| H | -3.219064118581 | -0.219008392355 | -1.842631305942 |

|   |                 |                 |                 |
|---|-----------------|-----------------|-----------------|
| H | -1.110753670765 | -0.925883790957 | -0.705008591580 |
| H | -1.889114223877 | -0.666645527234 | 0.888710483928  |

1 5 2.000  
 2 3 1.000 8 1.500  
 3 2 1.000  
 4 6 0.100 15 1.000 19 1.000 20 1.000  
 5 1 2.000 7 2.000 12 1.000  
 6 4 0.100 8 2.000 19 0.100  
 7 5 2.000  
 8 2 1.500 6 2.000 9 1.000  
 9 8 1.000 10 1.000 11 1.000 12 1.000  
 10 9 1.000  
 11 9 1.000  
 12 5 1.000 9 1.000 13 1.000 14 1.000  
 13 12 1.000  
 14 12 1.000  
 15 4 1.000 16 1.000 17 1.000 18 1.000  
 16 15 1.000  
 17 15 1.000  
 18 15 1.000  
 19 4 1.000 6 0.100  
 20 4 1.000

OH Boat R = Et Reactant

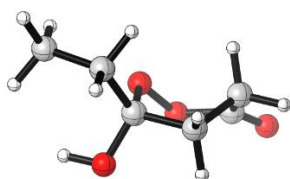

# Imaginary Frequencies = 0

E = -535.44272321

0,1

|   |                 |                 |                 |
|---|-----------------|-----------------|-----------------|
| O | -0.206091144206 | -0.851002074092 | -0.448037768079 |
| O | 1.093257010144  | -1.190756796586 | 0.019359800139  |
| O | -1.060272861943 | -0.247510045721 | 1.632792168999  |
| O | 3.158014244025  | -0.460315032199 | -0.115081674106 |
| C | -0.775746158822 | 0.217803874583  | 0.343498475787  |



|   |                 |                 |                 |
|---|-----------------|-----------------|-----------------|
| C | 0.246691673874  | 1.351316985942  | 0.460989305866  |
| H | 0.657984901193  | 1.355392688412  | 1.471566945629  |
| H | -0.241354710583 | 2.309644183285  | 0.287762198010  |
| C | 1.375540131786  | 1.136195714954  | -0.552049774230 |
| H | 0.983430841435  | 1.115868593164  | -1.572484434376 |
| H | 2.147333199559  | 1.899233520000  | -0.482203704285 |
| C | 1.996948395809  | -0.186066825343 | -0.244740432695 |
| C | -2.017063210845 | 0.612865048894  | -0.450211521911 |
| H | -1.678147782096 | 1.043982742927  | -1.395865186670 |
| H | -2.492412420646 | 1.414111053915  | 0.120958307709  |
| C | -3.007223870891 | -0.520737948594 | -0.703643061306 |
| H | -3.875678066535 | -0.131559889090 | -1.237150371784 |
| H | -2.566986685652 | -1.313561214527 | -1.309732384985 |
| H | -3.373505934124 | -0.960845655608 | 0.227669989752  |
| H | -1.794261951482 | -0.874989204315 | 1.590631152535  |

1 5 1.000

2 12 1.000

3 5 1.000 20 1.000

4 12 2.000

5 1 1.000 3 1.000 6 1.000 13 1.000

6 5 1.000 7 1.000 8 1.000 9 1.000

7 6 1.000

8 6 1.000

9 6 1.000 10 1.000 11 1.000 12 1.000

10 9 1.000

11 9 1.000

12 2 1.000 4 2.000 9 1.000

13 5 1.000 14 1.000 15 1.000 16 1.000

14 13 1.000

15 13 1.000

16 13 1.000 17 1.000 18 1.000 19 1.000

17 16 1.000

18 16 1.000

19 16 1.000

20 3 1.000

OH Boat R = Et Transition State

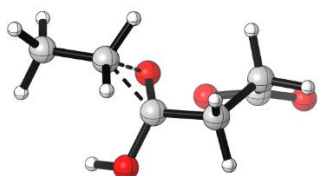

# Imaginary Frequencies = 1

E = -535.38935595

0,1

|   |                 |                 |                 |
|---|-----------------|-----------------|-----------------|
| O | 0.284771137423  | -0.076429204171 | -0.839518825576 |
| O | -1.402577900831 | 0.803658388165  | -0.979416972780 |
| O | 1.064267062957  | 0.995932901043  | 1.007366216637  |
| O | -3.460678469933 | 0.314457480769  | -0.364698222559 |
| C | 0.533366566889  | -0.108239207609 | 0.419299151347  |
| C | -0.486028245133 | -0.820045745974 | 1.296907791350  |
| H | -0.724127403351 | -0.146146929915 | 2.120704480628  |
| H | -0.071294108238 | -1.736456456215 | 1.715650229934  |
| C | -1.726662375148 | -1.121632179559 | 0.454608573771  |
| H | -1.502010838005 | -1.910258180092 | -0.269639786145 |
| H | -2.532945894435 | -1.470557721200 | 1.097440485968  |
| C | -2.250917281348 | 0.071295650551  | -0.334941605435 |
| C | 1.819847265614  | -1.255599615682 | -0.073652323336 |
| H | 1.301649620418  | -2.143947541326 | -0.419903345522 |
| H | 2.122763370802  | -1.344964582218 | 0.973198374742  |
| C | 2.903998472898  | -0.724541343893 | -0.960642271545 |
| H | 3.747060885403  | -1.417868007560 | -0.882486562537 |
| H | 2.595883919628  | -0.668154497522 | -2.002711284162 |
| H | 3.252863480516  | 0.252981657403  | -0.622800523776 |
| H | 1.530996403876  | 1.533851165006  | 0.348700098995  |

1 5 2.000

2 12 1.500

3 5 1.000 20 1.000

4 12 2.000

5 1 2.000 3 1.000 6 1.000 13 0.100

6 5 1.000 7 1.000 8 1.000 9 1.000

7 6 1.000

8 6 1.000

9 6 1.000 10 1.000 11 1.000 12 1.000

10 9 1.000

11 9 1.000  
 12 2 1.500 4 2.000 9 1.000  
 13 5 0.100 14 1.000 15 1.000 16 1.000  
 14 13 1.000  
 15 13 1.000  
 16 13 1.000 17 1.000 18 1.000 19 1.000  
 17 16 1.000  
 18 16 1.000  
 19 16 1.000  
 20 3 1.000

OOH Chair R = Me Reactant

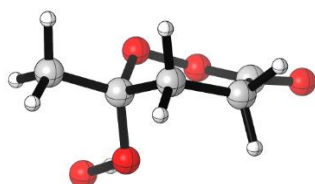

# Imaginary Frequencies = 0

E = -571.26030203

0,1

|   |                 |                 |                 |
|---|-----------------|-----------------|-----------------|
| O | -2.944980160476 | -0.603985142454 | -0.029665914500 |
| C | -1.838754461417 | -0.140663350173 | 0.055570917600  |
| O | 0.263460892475  | -0.261667738310 | 1.204557062523  |
| O | -0.970721335981 | -0.871610944654 | 0.825772869206  |
| C | 0.909246080617  | 0.407317029763  | 0.115918167394  |
| C | 0.037495979557  | 1.560185476003  | -0.332673481370 |
| H | -0.006832530149 | 2.259537403369  | 0.502655494026  |
| H | 0.496741432877  | 2.066367567821  | -1.181368648655 |
| C | -1.356479409414 | 1.060906085338  | -0.697640916972 |
| H | -2.112020222657 | 1.837130117004  | -0.574880936413 |
| H | -1.397014420896 | 0.743532208656  | -1.743922981921 |
| C | 2.253345091974  | 0.816172967683  | 0.670185473713  |
| H | 2.818537229153  | -0.053961917017 | 0.999247110709  |
| H | 2.801791219694  | 1.333179601480  | -0.118398057430 |
| H | 2.111461196013  | 1.497250562910  | 1.509090230200  |
| O | 0.988778974161  | -0.461988382231 | -0.995553443473 |
| O | 1.737419271209  | -1.617628777449 | -0.664389111598 |
| H | 1.052904303261  | -2.239241677741 | -0.369173533040 |

1 2 2.000  
 2 1 2.000 4 1.000 9 1.000  
 3 5 1.000  
 4 2 1.000  
 5 3 1.000 6 1.000 12 1.000 16 1.000  
 6 5 1.000 7 1.000 8 1.000 9 1.000  
 7 6 1.000  
 8 6 1.000  
 9 2 1.000 6 1.000 10 1.000 11 1.000  
 10 9 1.000  
 11 9 1.000  
 12 5 1.000 13 1.000 14 1.000 15 1.000  
 13 12 1.000  
 14 12 1.000  
 15 12 1.000  
 16 5 1.000 17 0.100  
 17 16 0.100 18 1.000  
 18 17 1.000

OOH Chair R = Me Transition State

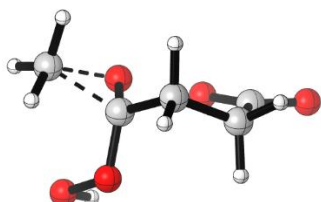

# Imaginary Frequencies = 1

E = -571.20213242

0,1

|   |                 |                 |                 |
|---|-----------------|-----------------|-----------------|
| O | 3.031594453210  | -0.198859183776 | -0.073621927812 |
| C | 1.794803882234  | -0.182831231989 | -0.021626552466 |
| O | -0.803826564902 | -1.077986462132 | -0.252895236634 |
| O | 1.112482104876  | -1.259033851556 | 0.134439461277  |
| C | -1.089764224443 | 0.114537461933  | 0.095703303871  |
| C | -0.346299597700 | 1.239658130322  | -0.562510448474 |
| H | -0.390469209263 | 1.083234264831  | -1.639819741960 |
| H | -0.806104064772 | 2.194057762502  | -0.311025001108 |
| C | 1.101172913108  | 1.177585171085  | -0.055449770242 |
| H | 1.715536761709  | 1.834916599046  | -0.669432390651 |
| H | 1.144615882183  | 1.547756321114  | 0.973026803601  |

|   |                 |                 |                 |
|---|-----------------|-----------------|-----------------|
| C | -2.570409582478 | -0.322024311154 | -0.719683351642 |
| H | -2.985438341088 | -1.279285103934 | -0.426638854468 |
| H | -3.102670186877 | 0.506982079128  | -0.241489322846 |
| H | -2.400521070852 | -0.196764013242 | -1.781042360755 |
| O | -1.291280820544 | 0.386499055498  | 1.431303933103  |
| O | -1.855541717421 | -0.720977436155 | 2.097477440585  |
| H | -1.077271636979 | -1.238895611520 | 2.364536336619  |

1 2 2.000  
 2 1 2.000 4 2.000 9 1.000  
 3 5 1.500  
 4 2 2.000  
 5 3 1.500 6 1.000 12 0.100 16 1.000  
 6 5 1.000 7 1.000 8 1.000 9 1.000  
 7 6 1.000  
 8 6 1.000  
 9 2 1.000 6 1.000 10 1.000 11 1.000  
 10 9 1.000  
 11 9 1.000  
 12 5 0.100 13 1.000 14 1.000 15 1.000  
 13 12 1.000  
 14 12 1.000  
 15 12 1.000  
 16 5 1.000 17 1.000  
 17 16 1.000 18 1.000  
 18 17 1.000

OOH R = Me Product

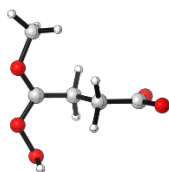

# Imaginary Frequencies = 0

E = -571.31007525

0,1

|   |                 |                 |                 |
|---|-----------------|-----------------|-----------------|
| O | -2.472310393594 | 0.275705482238  | 1.110195449284  |
| O | 2.007889162807  | -1.712867880901 | 0.041448974422  |
| C | 2.128246508653  | 1.784706265052  | -0.050903682478 |
| H | 3.002891412511  | 2.243272621713  | -0.498084463957 |

|   |                 |                 |                 |
|---|-----------------|-----------------|-----------------|
| H | 1.230214302334  | 2.006936385031  | -0.622596651582 |
| H | 2.029952314473  | 2.056579210801  | 0.997107838645  |
| C | -2.227218175765 | 0.016586090173  | -0.090338224010 |
| O | 2.401080130996  | 0.349582911633  | -0.133194149455 |
| O | -3.062454582052 | -0.008581615739 | -1.028885975048 |
| C | 1.540773003601  | -0.505524425824 | 0.223536360936  |
| C | 0.180910198489  | -0.223826386461 | 0.711388393244  |
| H | -0.087146149609 | -0.960573230997 | 1.465058397450  |
| H | 0.162194587388  | 0.771345127236  | 1.150429134305  |
| C | -0.780674172391 | -0.304988787127 | -0.492464582618 |
| H | -0.480124146954 | 0.398383692350  | -1.272574240729 |
| H | -0.762319824114 | -1.306502283122 | -0.927906477544 |
| O | 1.115826411694  | -2.714880744109 | 0.464457197991  |
| H | 0.871263681534  | -3.130412471945 | -0.382328108858 |

1 7 2.000

2 10 2.000 17 1.000

3 4 1.000 5 1.000 6 1.000 8 1.000

4 3 1.000

5 3 1.000

6 3 1.000

7 1 2.000 9 2.000 14 1.000

8 3 1.000 10 2.000

9 7 2.000

10 2 2.000 8 2.000 11 1.000

11 10 1.000 12 1.000 13 1.000 14 1.000

12 11 1.000

13 11 1.000

14 7 1.000 11 1.000 15 1.000 16 1.000

15 14 1.000

16 14 1.000

17 2 1.000 18 1.000

18 17 1.000

### OOH Boat R = Me Reactant

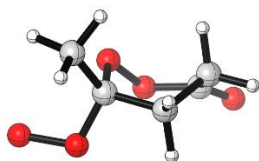

# Imaginary Frequencies = 0

E = -571.26502377

0,1

|   |                 |                 |                 |
|---|-----------------|-----------------|-----------------|
| O | -0.175731436109 | -0.368374164750 | -1.005081500649 |
| O | 0.951256236478  | -1.061286078643 | -0.481750341459 |
| O | -1.414436963696 | -0.515370794831 | 0.957400625236  |
| O | -2.457285523676 | -1.261473673726 | 0.353053717386  |
| H | -2.000148249481 | -2.056467392969 | 0.037062055794  |
| O | 3.023376998443  | -0.671354420623 | 0.124005288621  |
| C | -0.842752809858 | 0.376511562470  | 0.022977440538  |
| C | 0.169866566490  | 1.195394856196  | 0.827188849897  |
| H | 0.314110092043  | 0.735061710053  | 1.806541229741  |
| H | -0.210084825509 | 2.204507309727  | 0.975558672458  |
| C | 1.501065092392  | 1.224554729305  | 0.070271326698  |
| H | 1.375721440477  | 1.678658080614  | -0.916444961680 |
| H | 2.272651719027  | 1.762989217590  | 0.615268292822  |
| C | 1.949333257001  | -0.189058803896 | -0.101849229233 |
| C | -1.854346702305 | 1.205061953157  | -0.736520488628 |
| H | -2.436698745385 | 0.590964251754  | -1.421398883898 |
| H | -1.329003904469 | 1.978106905571  | -1.298492390072 |
| H | -2.519921241864 | 1.678798753001  | -0.013872703572 |

1 7 1.000

2 14 1.000

3 4 0.100 7 1.000

4 3 0.100 5 1.000

5 4 1.000

6 14 2.000

7 1 1.000 3 1.000 8 1.000 15 1.000

8 7 1.000 9 1.000 10 1.000 11 1.000

9 8 1.000

10 8 1.000

11 8 1.000 12 1.000 13 1.000 14 1.000

12 11 1.000

13 11 1.000

14 2 1.000 6 2.000 11 1.000

15 7 1.000 16 1.000 17 1.000 18 1.000

16 15 1.000

17 15 1.000

18 15 1.000

OOH Boat R = Me Transition State

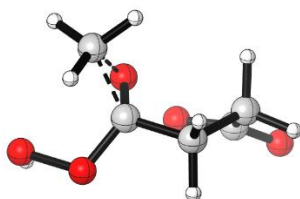

# Imaginary Frequencies = 1

E = -571.20115975

0,1

|   |                 |                 |                 |
|---|-----------------|-----------------|-----------------|
| O | 0.476282578169  | -0.169479531082 | 0.996183311566  |
| O | -1.107242070904 | -1.224797452141 | 0.540327108276  |
| O | 1.592741075531  | -0.427279677140 | -0.981570501452 |
| O | 2.528681329220  | -1.203050915033 | -0.264517030777 |
| H | 2.053841074108  | -2.036805708740 | -0.109575140670 |
| O | -3.147580700323 | -0.730128783128 | -0.144208386501 |
| C | 0.823774469169  | 0.329182447104  | -0.127460694618 |
| C | -0.182299280711 | 1.150628836650  | -0.907146144160 |
| H | -0.218552177381 | 0.733910037545  | -1.915620690513 |
| H | 0.145276479195  | 2.186810393664  | -0.979378055924 |
| C | -1.537450311566 | 1.036995561008  | -0.209278531142 |
| H | -1.506147281735 | 1.560127106202  | 0.751131524053  |
| H | -2.302530647413 | 1.505631473337  | -0.825448610549 |
| C | -1.976444041260 | -0.397733070227 | 0.070313198142  |
| C | 1.791133350822  | 1.286526707885  | 0.972941430710  |
| H | 2.280324865570  | 0.753656696539  | 1.780393495817  |
| H | 1.152471767194  | 2.102950577757  | 1.286487350515  |
| H | 2.499818522316  | 1.532624299800  | 0.176253367225  |

1 7 1.667 15 0.333

2 14 1.500

3 4 0.067 7 1.167

4 3 0.067 5 1.000

5 4 1.000

6 14 2.000

7 1 1.667 3 1.167 8 1.000 15 0.333

8 7 1.000 9 1.000 10 1.000 11 1.000



9 8 1.000  
 10 8 1.000  
 11 8 1.000 12 1.000 13 1.000 14 1.000  
 12 11 1.000  
 13 11 1.000  
 14 2 1.500 6 2.000 11 1.000  
 15 1 0.333 7 0.333 16 1.000 17 1.000 18 1.000  
 16 15 1.000  
 17 15 1.000  
 18 15 1.000

OOH Chair R = Et Reactant

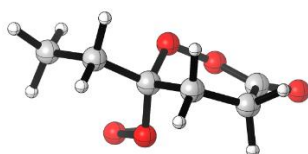

# Imaginary Frequencies = 0

E = -610.55954301

0,1

|   |                 |                 |                 |
|---|-----------------|-----------------|-----------------|
| O | -2.954812979918 | -0.519528106401 | -0.023971466779 |
| C | -1.834953883721 | -0.091040177504 | 0.065839930009  |
| O | 0.265850497320  | -0.290789801308 | 1.194650944695  |
| O | -0.986714510458 | -0.862193926608 | 0.818233424699  |
| C | 0.930834809112  | 0.347179875176  | 0.104437740853  |
| C | 0.105476358506  | 1.540619482604  | -0.335252503173 |
| H | 0.118207068189  | 2.251835689301  | 0.490767412088  |
| H | 0.568211265740  | 2.013398346743  | -1.201349295286 |
| C | -1.321949150903 | 1.113393448957  | -0.662072480569 |
| H | -2.036942501829 | 1.917078925152  | -0.483536911559 |
| H | -1.416728508121 | 0.836711018028  | -1.716033673955 |
| C | 2.293345743822  | 0.750494593683  | 0.651050617849  |
| H | 2.756007399670  | 1.355682192876  | -0.133019070033 |
| H | 2.095675761510  | 1.420839807895  | 1.491286160157  |
| O | 0.948363221255  | -0.510620988491 | -1.023531701437 |
| O | 1.457070637541  | -1.791110433107 | -0.691473645046 |
| H | 0.647337702557  | -2.305743929299 | -0.543514795567 |
| C | 3.236834455522  | -0.366646301211 | 1.087915230401  |
| H | 4.099983884225  | 0.079230625389  | 1.585662528095  |

|   |                |                 |                |
|---|----------------|-----------------|----------------|
| H | 2.757019297206 | -1.048636784958 | 1.791533544347 |
| H | 3.598786192775 | -0.944878176916 | 0.239008190212 |

1 2 2.000  
 2 1 2.000 4 1.000 9 1.000  
 3 5 1.000  
 4 2 1.000  
 5 3 1.000 6 1.000 12 1.000 15 1.000  
 6 5 1.000 7 1.000 8 1.000 9 1.000  
 7 6 1.000  
 8 6 1.000  
 9 2 1.000 6 1.000 10 1.000 11 1.000  
 10 9 1.000  
 11 9 1.000  
 12 5 1.000 13 1.000 14 1.000 18 1.000  
 13 12 1.000  
 14 12 1.000  
 15 5 1.000 16 0.100  
 16 15 0.100 17 1.000  
 17 16 1.000  
 18 12 1.000 19 1.000 20 1.000 21 1.000  
 19 18 1.000  
 20 18 1.000  
 21 18 1.000

OOH Chair R = Et Transition State

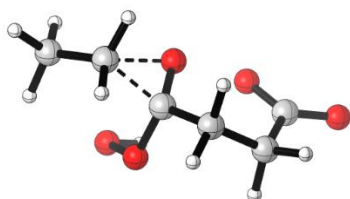

# Imaginary Frequencies = 1

E = -610.50993129

0,1

|   |                 |                 |                 |
|---|-----------------|-----------------|-----------------|
| O | 3.475962704369  | -0.533080395929 | -0.253444694945 |
| C | 2.258673404847  | -0.328204253690 | -0.173173104894 |
| O | -0.400590767792 | -0.564828761870 | -0.769050743622 |
| O | 1.406067662451  | -1.241010855117 | -0.476761803608 |
| C | -0.548300706275 | 0.383543216976  | 0.051001930861  |

|   |                 |                 |                 |
|---|-----------------|-----------------|-----------------|
| C | 0.417149501799  | 1.537381135116  | -0.024357406200 |
| H | 0.423635132050  | 1.893591325520  | -1.054745767788 |
| H | 0.093501376671  | 2.340920099928  | 0.636326174324  |
| C | 1.792189582771  | 1.008952873933  | 0.394519312812  |
| H | 2.550721218806  | 1.745986348884  | 0.133135525459  |
| H | 1.815816051672  | 0.878103418894  | 1.480668754733  |
| C | -2.066988908242 | 0.792625207331  | -0.829052229664 |
| H | -2.106318310841 | 1.760907811761  | -0.322743390616 |
| H | -1.795061252277 | 0.893536263511  | -1.873769433086 |
| O | -0.830440499547 | 0.089958533893  | 1.380165163252  |
| O | -1.341002165846 | -1.215835816710 | 1.530130492770  |
| H | -0.537683011532 | -1.763336773822 | 1.555665365992  |
| C | -3.210860791774 | -0.111776766535 | -0.518727007711 |
| H | -3.097537197539 | -1.099471382776 | -0.961884927893 |
| H | -3.392492336828 | -0.191489412218 | 0.551582638632  |
| H | -4.088318796944 | 0.366547782920  | -0.971112708806 |

1 2 2.000

2 1 2.000 4 2.000 9 1.000

3 5 2.000

4 2 2.000

5 3 2.000 6 1.000 12 0.100 15 1.000

6 5 1.000 7 1.000 8 1.000 9 1.000

7 6 1.000

8 6 1.000

9 2 1.000 6 1.000 10 1.000 11 1.000

10 9 1.000

11 9 1.000

12 5 0.100 13 1.000 14 1.000 18 1.000

13 12 1.000

14 12 1.000

15 5 1.000 16 0.100

16 15 0.100 17 1.000

17 16 1.000

18 12 1.000 19 1.000 20 1.000 21 1.000

19 18 1.000

20 18 1.000

21 18 1.000

OOH R = Et Product

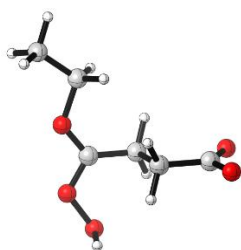

# Imaginary Frequencies = 0

E = -610.61972403

0,1

|   |                 |                 |                 |
|---|-----------------|-----------------|-----------------|
| O | -2.600245695776 | 0.289780819809  | 1.171904595340  |
| O | 1.983430673670  | -1.244136118613 | -0.189049327737 |
| C | 1.814772660447  | 2.274313423704  | -0.068843288521 |
| H | 0.863677177735  | 2.410155767310  | -0.581045022001 |
| H | 1.707870605993  | 2.432564603481  | 1.002757661444  |
| C | -2.386324510635 | 0.097526781540  | -0.047025877102 |
| O | 2.200279038405  | 0.852448577386  | -0.246372450288 |
| O | -3.257528309517 | 0.019139363945  | -0.949375911896 |
| C | 1.428275861802  | -0.089440418971 | 0.084388903978  |
| C | 0.070841193849  | 0.046621718903  | 0.639757959549  |
| H | -0.096613205521 | -0.749053589053 | 1.362528738072  |
| H | -0.014417643098 | 1.012257035341  | 1.133043366718  |
| C | -0.935826201640 | -0.059977409440 | -0.523798154883 |
| H | -0.740435973741 | 0.713529946439  | -1.270320966905 |
| H | -0.845612368179 | -1.026979215159 | -1.023535822624 |
| O | 1.193066943581  | -2.342525495722 | 0.195847739273  |
| H | 0.857735846585  | -2.660878826860 | -0.662717375215 |
| C | 2.924522061430  | 3.087077192392  | -0.671367329188 |
| H | 2.674080398231  | 4.142301085283  | -0.550004324308 |
| H | 3.868684608609  | 2.892227891910  | -0.161971037277 |
| H | 3.030224777770  | 2.873467376374  | -1.735270666428 |

1 6 2.000

2 9 1.500 16 0.100

3 4 1.000 5 1.000 7 1.000 18 1.000

4 3 1.000

5 3 1.000

6 1 2.000 8 2.000 13 1.000

7 3 1.000 9 2.000  
 8 6 2.000  
 9 2 1.500 7 2.000 10 1.000  
 10 9 1.000 11 1.000 12 1.000 13 1.000  
 11 10 1.000  
 12 10 1.000  
 13 6 1.000 10 1.000 14 1.000 15 1.000  
 14 13 1.000  
 15 13 1.000  
 16 2 0.100 17 1.000  
 17 16 1.000  
 18 3 1.000 19 1.000 20 1.000 21 1.000  
 19 18 1.000  
 20 18 1.000  
 21 18 1.000

OOH Boat R = Et Reactant

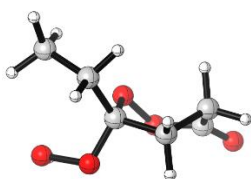

# Imaginary Frequencies = 0

E = -610.56398741

0,1

|   |                 |                 |                 |
|---|-----------------|-----------------|-----------------|
| O | -0.288968691682 | -0.882506280641 | -0.313875716824 |
| O | 1.011470630977  | -1.215129956889 | 0.157897767790  |
| O | -1.011711781627 | -0.102608305692 | 1.751402339694  |
| O | 3.087533611838  | -0.535475687914 | -0.042209861901 |
| C | -0.818159613370 | 0.241823580130  | 0.394067843399  |
| C | 0.214900214192  | 1.374652259150  | 0.440640665892  |
| H | 0.632553109914  | 1.446987449887  | 1.446310489905  |
| H | -0.264624695589 | 2.321914929333  | 0.200544070996  |
| C | 1.332992596561  | 1.067707076187  | -0.560088816622 |
| H | 0.932843297115  | 0.989140467476  | -1.574771126924 |
| H | 2.118638310579  | 1.819216259921  | -0.543925975433 |
| C | 1.932326055693  | -0.244595429066 | -0.176097905673 |
| C | -2.074598839904 | 0.631158151347  | -0.382276425213 |
| H | -1.713028588841 | 1.161795113911  | -1.267635700082 |

|   |                 |                 |                 |
|---|-----------------|-----------------|-----------------|
| H | -2.588032400416 | 1.369238335901  | 0.239676592097  |
| C | -3.032606809052 | -0.474646293808 | -0.823195954581 |
| H | -3.774950271781 | -0.042394467576 | -1.496976613070 |
| H | -2.511732245720 | -1.263086831759 | -1.368824667143 |
| H | -3.558620493861 | -0.924233011922 | 0.016175803903  |
| O | -1.956999429467 | -1.150257869635 | 1.877291408220  |
| H | -1.404178175559 | -1.946488498341 | 1.836299231572  |

1 5 1.000  
 2 12 1.000  
 3 5 1.000 20 1.000  
 4 12 2.000  
 5 1 1.000 3 1.000 6 1.000 13 1.000  
 6 5 1.000 7 1.000 8 1.000 9 1.000  
 7 6 1.000  
 8 6 1.000  
 9 6 1.000 10 1.000 11 1.000 12 1.000  
 10 9 1.000  
 11 9 1.000  
 12 2 1.000 4 2.000 9 1.000  
 13 5 1.000 14 1.000 15 1.000 16 1.000  
 14 13 1.000  
 15 13 1.000  
 16 13 1.000 17 1.000 18 1.000 19 1.000  
 17 16 1.000  
 18 16 1.000  
 19 16 1.000  
 20 3 1.000 21 1.000  
 21 20 1.000

OOH Boat R = Et Transition State

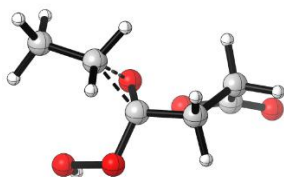

# Imaginary Frequencies = 1

E = -610.50779387

0,1

|   |                 |                 |                 |
|---|-----------------|-----------------|-----------------|
| O | -0.377342535359 | -0.249657831043 | -1.007373701423 |
| O | 1.217356669692  | -1.207487188795 | -0.481343788951 |
| O | -1.529429053367 | -0.520508006268 | 0.947321783569  |
| O | 3.190066025037  | -0.624190181912 | 0.309983663760  |
| C | -0.798326217717 | 0.262749656898  | 0.071596540271  |
| C | 0.126445459022  | 1.179268591208  | 0.856736917515  |
| H | 0.131243382564  | 0.828069375340  | 1.889802460919  |
| H | -0.242707125961 | 2.203902506758  | 0.846959709308  |
| C | 1.519602613560  | 1.088080146986  | 0.232917259581  |
| H | 1.519980109920  | 1.577449018363  | -0.745570967235 |
| H | 2.237650809319  | 1.601448943595  | 0.869935704026  |
| C | 2.025332191088  | -0.334610780521 | 0.020758964225  |
| C | -1.863407903703 | 1.246048778963  | -1.013421744068 |
| H | -1.165263879160 | 1.994928576398  | -1.374144150364 |
| H | -2.425874449362 | 1.577321661270  | -0.136079197142 |
| C | -2.706607216367 | 0.587776653007  | -2.059310683442 |
| H | -3.397390560002 | 1.362309732245  | -2.411343191824 |
| H | -2.118311688394 | 0.243107807993  | -2.907399950110 |
| H | -3.300033580086 | -0.228573758037 | -1.653126981655 |
| O | -2.269916253248 | -1.509060226027 | 0.266185202766  |
| H | -1.643321157475 | -2.249473196422 | 0.205941820275  |

1 5 1.667 13 0.333

2 12 1.500

3 5 1.167 20 0.067

4 12 2.000

5 1 1.667 3 1.167 6 1.000 13 0.333

6 5 1.000 7 1.000 8 1.000 9 1.000

7 6 1.000

8 6 1.000

9 6 1.000 10 1.000 11 1.000 12 1.000

10 9 1.000

11 9 1.000

12 2 1.500 4 2.000 9 1.000

13 1 0.333 5 0.333 14 1.000 15 1.000 16 1.000

14 13 1.000

15 13 1.000

16 13 1.000 17 1.000 18 1.000 19 1.000

17 16 1.000  
18 16 1.000  
19 16 1.000  
20 3 0.067 21 1.000  
21 20 1.000

### Anomeric Loss

OH Chair R = Me with HOCO dihedral from Transition State

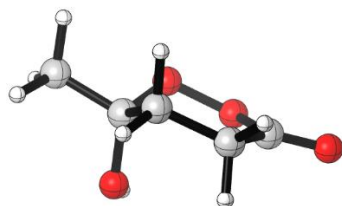

# Imaginary Frequencies = 1

E = -496.13300172

0,1

|   |                 |                 |                 |
|---|-----------------|-----------------|-----------------|
| O | 2.856061919338  | -0.232852626779 | -0.006401271131 |
| C | 1.670773799071  | -0.046579289290 | -0.094900348501 |
| O | -0.457518444368 | -1.080833658509 | -0.543872764946 |
| O | 0.915727492877  | -1.190218775682 | -0.149376779867 |
| C | -1.132793921296 | 0.031401650958  | 0.058340595291  |
| C | -0.468125060876 | 1.310325377102  | -0.398690340457 |
| H | -0.589901059854 | 1.380548670070  | -1.480282959473 |
| H | -0.966154232427 | 2.164352909241  | 0.060897730407  |
| C | 1.005219455925  | 1.291647056444  | -0.016346368470 |
| H | 1.597864756319  | 1.980388273623  | -0.618089453917 |
| H | 1.137730190456  | 1.585835734822  | 1.029674770362  |
| C | -2.555825538233 | -0.129264668612 | -0.435971574550 |
| H | -2.964506614890 | -1.078056044571 | -0.085277332162 |
| H | -3.148619260275 | 0.689379756255  | -0.025661054519 |
| H | -2.596010825210 | -0.088349322325 | -1.524663946349 |
| O | -1.054268148414 | -0.061634040522 | 1.461397325405  |
| H | -0.920347808143 | -0.986532222226 | 1.707421662877  |

1 2 2.000

2 1 2.000 4 1.000 9 1.000

3 5 1.000

4 2 1.000

5 3 1.000 6 1.000 12 1.000 16 1.000



6 5 1.000 7 1.000 8 1.000 9 1.000  
 7 6 1.000  
 8 6 1.000  
 9 2 1.000 6 1.000 10 1.000 11 1.000  
 10 9 1.000  
 11 9 1.000  
 12 5 1.000 13 1.000 14 1.000 15 1.000  
 13 12 1.000  
 14 12 1.000  
 15 12 1.000  
 16 5 1.000 17 1.000  
 17 16 1.000

OOH Chair R = Me with OOCO Dihedral from Transition State

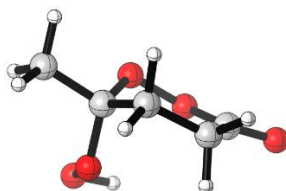

# Imaginary Frequencies = 0

E = -571.25528849

0,1

|   |                 |                 |                 |
|---|-----------------|-----------------|-----------------|
| O | -2.989194123413 | -0.464000512522 | 0.108637385990  |
| C | -1.858304663272 | -0.059643713824 | 0.122181456071  |
| O | 0.297929986619  | -0.288076498008 | 1.174104538494  |
| O | -0.980264823197 | -0.841835975066 | 0.834783440053  |
| C | 0.907379381998  | 0.405278400717  | 0.101091663796  |
| C | 0.055723138584  | 1.574701544502  | -0.328315195266 |
| H | 0.044507405599  | 2.280309997321  | 0.503501684394  |
| H | 0.512248190870  | 2.066075662829  | -1.187629257893 |
| C | -1.352899801734 | 1.106029667279  | -0.669052856780 |
| H | -2.086495742968 | 1.905202467501  | -0.564999049149 |
| H | -1.406358716759 | 0.757256183713  | -1.705144666563 |
| C | 2.266795579960  | 0.776753419340  | 0.653354074705  |
| H | 2.830468187233  | -0.127797636204 | 0.885136438388  |
| H | 2.797215675210  | 1.350527877394  | -0.107331443924 |
| H | 2.161183115088  | 1.384405137709  | 1.552074029018  |
| O | 1.039453502713  | -0.444280254150 | -1.048786712496 |
| O | 1.247325287315  | -1.792871257772 | -0.676396958356 |

|                                       |                |                 |                 |
|---------------------------------------|----------------|-----------------|-----------------|
| H                                     | 0.343987120154 | -2.138956180760 | -0.596921210480 |
|                                       |                |                 |                 |
| 1 2 2.000                             |                |                 |                 |
| 2 1 2.000 4 1.000 9 1.000             |                |                 |                 |
| 3 5 1.000                             |                |                 |                 |
| 4 2 1.000                             |                |                 |                 |
| 5 3 1.000 6 1.000 12 1.000 16 1.000   |                |                 |                 |
| 6 5 1.000 7 1.000 8 1.000 9 1.000     |                |                 |                 |
| 7 6 1.000                             |                |                 |                 |
| 8 6 1.000                             |                |                 |                 |
| 9 2 1.000 6 1.000 10 1.000 11 1.000   |                |                 |                 |
| 10 9 1.000                            |                |                 |                 |
| 11 9 1.000                            |                |                 |                 |
| 12 5 1.000 13 1.000 14 1.000 15 1.000 |                |                 |                 |
| 13 12 1.000                           |                |                 |                 |
| 14 12 1.000                           |                |                 |                 |
| 15 12 1.000                           |                |                 |                 |
| 16 5 1.000 17 0.100                   |                |                 |                 |
| 17 16 0.100 18 1.000                  |                |                 |                 |
| 18 17 1.000                           |                |                 |                 |

5 membered OH with R = Me Reactant

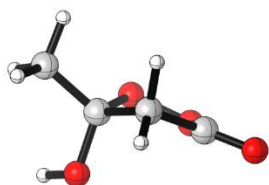

# Imaginary Frequencies = 0

E = -456.83446088

0,1

|   |                 |                 |                 |
|---|-----------------|-----------------|-----------------|
| O | 3.339010103435  | 0.586765794727  | -0.046641801006 |
| C | 2.190801682952  | 0.256386662104  | -0.110172951577 |
| O | 0.457961428885  | -1.140606267732 | -0.526376419719 |
| O | 1.878322890510  | -1.041033591933 | -0.425690691429 |
| C | -0.078373763585 | -0.098476274990 | 0.326032880600  |
| C | 0.922650136275  | 1.020190081000  | 0.115942514460  |
| H | 0.697112513734  | 1.583538128710  | -0.792501996110 |
| H | 1.015248064399  | 1.694189966617  | 0.963947430356  |

|   |                 |                 |                 |
|---|-----------------|-----------------|-----------------|
| O | 0.011346814918  | -0.495443231050 | 1.664812936879  |
| H | -0.640616552077 | -1.190352496430 | 1.829181297169  |
| C | -1.494438680729 | 0.130534398453  | -0.136578339422 |
| H | -1.509823307001 | 0.426559468800  | -1.184700619331 |
| H | -2.075964929240 | -0.784546644236 | -0.004589912359 |
| H | -1.934112912474 | 0.921705545960  | 0.471409011490  |

1 2 2.000  
 2 1 2.000 4 1.000 6 1.000  
 3 5 1.000  
 4 2 1.000  
 5 3 1.000 6 1.000 9 1.000 11 1.000  
 6 2 1.000 5 1.000 7 1.000 8 1.000  
 7 6 1.000  
 8 6 1.000  
 9 5 1.000 10 1.000  
 10 9 1.000  
 11 5 1.000 12 1.000 13 1.000 14 1.000  
 12 11 1.000  
 13 11 1.000  
 14 11 1.000

5 membered OH with R = Me Transition State

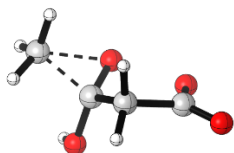

# Imaginary Frequencies = 1

E = -456.76995696

0,1

|   |                 |                 |                 |
|---|-----------------|-----------------|-----------------|
| O | -2.653021419835 | -0.465855661515 | -0.110084994844 |
| C | -1.512170566457 | -0.000533421132 | -0.091265860103 |
| O | 0.733612186150  | 1.077887735896  | -0.185862818273 |
| O | -1.197910498688 | 1.201458551920  | 0.192750872466  |
| C | 0.825262351983  | -0.171615659604 | 0.123032685088  |
| C | -0.314893518814 | -0.930444620652 | -0.461050963763 |
| H | -0.264453569468 | -0.956778742206 | -1.550458234264 |
| H | -0.443290832071 | -1.929385163286 | -0.053370895042 |
| C | 2.260889527598  | -0.099042963992 | -0.844083446520 |

|   |                |                 |                 |
|---|----------------|-----------------|-----------------|
| H | 2.971808319574 | 0.593233051162  | -0.406919921884 |
| H | 2.519321914805 | -1.140085273495 | -0.633899840154 |
| H | 2.010731730836 | 0.085030170437  | -1.880745335374 |
| O | 1.118189710165 | -0.518312981553 | 1.403174868589  |
| H | 1.645694664222 | 0.178826978019  | 1.824130884078  |

1 2 2.000  
 2 1 2.000 4 2.000 6 1.000  
 3 5 1.500  
 4 2 2.000  
 5 3 1.500 6 1.000 9 0.100 13 1.000  
 6 2 1.000 5 1.000 7 1.000 8 1.000  
 7 6 1.000  
 8 6 1.000  
 9 5 0.100 10 1.000 11 1.000 12 1.000  
 10 9 1.000  
 11 9 1.000  
 12 9 1.000  
 13 5 1.000 14 1.000  
 14 13 1.000

5 membered OOH R = Me Reactant

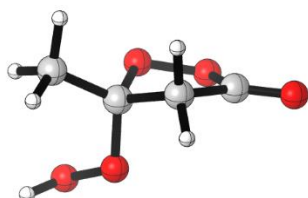

# Imaginary Frequencies = 0

E = -531.95720941

0,1

|   |                 |                 |                 |
|---|-----------------|-----------------|-----------------|
| O | 3.343956062744  | 0.634949598559  | -0.177839599535 |
| C | 2.204051769166  | 0.276258393512  | -0.174751305013 |
| O | 0.482715522206  | -1.159003138164 | -0.515170086878 |
| O | 1.903759951323  | -1.027368645257 | -0.481295994900 |
| C | -0.040385739871 | -0.132908544304 | 0.336359469701  |
| C | 0.934730169250  | 1.009565518285  | 0.135285045816  |
| H | 0.654666654980  | 1.609640073600  | -0.733155414867 |
| H | 1.056107748760  | 1.648726223072  | 1.007278216040  |
| O | 0.139143516845  | -0.506426741378 | 1.689817928060  |

|   |                 |                 |                 |
|---|-----------------|-----------------|-----------------|
| C | -1.478549072448 | 0.078185805147  | -0.055983746110 |
| H | -1.523903896607 | 0.462865280141  | -1.073761397633 |
| H | -2.032197107013 | -0.858369633935 | 0.002743240319  |
| H | -1.921398609297 | 0.804782112231  | 0.626560809801  |
| O | -0.614011541717 | -1.672107127945 | 1.970393691088  |
| H | -1.409313948322 | -1.317650343565 | 2.398026984109  |

1 2 2.000  
 2 1 2.000 4 1.000 6 1.000  
 3 5 1.000  
 4 2 1.000  
 5 3 1.000 6 1.000 9 1.000 10 1.000  
 6 2 1.000 5 1.000 7 1.000 8 1.000  
 7 6 1.000  
 8 6 1.000  
 9 5 1.000 14 1.000  
 10 5 1.000 11 1.000 12 1.000 13 1.000  
 11 10 1.000  
 12 10 1.000  
 13 10 1.000  
 14 9 1.000 15 1.000  
 15 14 1.000

5 membered OOH R = Me Transition State

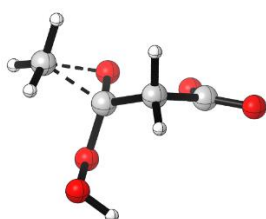

# Imaginary Frequencies = 1

E = -531.88642463

0,1

|   |                 |                 |                 |
|---|-----------------|-----------------|-----------------|
| O | 2.718382930799  | -0.658337148112 | 0.408162463922  |
| C | 1.700469800683  | -0.047912052906 | 0.074664589140  |
| O | -0.303124419000 | 1.351474176189  | -0.536705229391 |
| O | 1.572177983693  | 0.734949216055  | -0.914512973636 |
| C | -0.635231945249 | 0.263950347061  | 0.037633486523  |
| C | 0.421080383064  | -0.223167232926 | 0.964587948565  |
| H | 0.538682050112  | 0.451048174080  | 1.814203551930  |

|   |                 |                 |                 |
|---|-----------------|-----------------|-----------------|
| H | 0.305759551395  | -1.248935737960 | 1.301136676583  |
| C | -1.899855264047 | 1.214581282787  | 0.729647115650  |
| H | -2.493340510696 | 1.683119132565  | -0.047031241050 |
| H | -2.396942930342 | 0.335683295506  | 1.154810068179  |
| H | -1.469440035879 | 1.881242762002  | 1.465394960365  |
| O | -1.205558816160 | -0.647542556461 | -0.846979833840 |
| O | -1.668489638037 | -1.773046862219 | -0.131008041349 |
| H | -0.999484140338 | -2.448062795664 | -0.333821541591 |

1 2 2.000

2 1 2.000 4 2.000 6 1.000

3 5 2.000

4 2 2.000

5 3 2.000 6 1.000 9 0.100 13 1.000

6 2 1.000 5 1.000 7 1.000 8 1.000

7 6 1.000

8 6 1.000

9 5 0.100 10 1.000 11 1.000 12 1.000

10 9 1.000

11 9 1.000

12 9 1.000

13 5 1.000 14 0.100

14 13 0.100 15 1.000

15 14 1.000

## X-ray studies

**Table S1.** Crystallographic data for **2m**

|                                                       |                                              |
|-------------------------------------------------------|----------------------------------------------|
| datablock                                             | <b>2m</b>                                    |
| Brutto formula                                        | C <sub>5</sub> H <sub>8</sub> O <sub>5</sub> |
| Formula weight                                        | 148.11                                       |
| Diffractometer                                        | Bruker APEX-II CCD                           |
| Scan mode                                             | φ and ω scans                                |
| Anode [Wavelength, Å]                                 | MoKα [0.71073]                               |
| Crystal Dimensions, mm                                | 0.05 × 0.2 × 0.4                             |
| Crystal color                                         | colourless                                   |
| Crystal system                                        | monoclinic                                   |
| a, Å                                                  | 9.8512(13)                                   |
| b, Å                                                  | 5.7699(8)                                    |
| c, Å                                                  | 11.7734(16)                                  |
| β, °                                                  | 102.850(3)                                   |
| Volume, Å <sup>3</sup>                                | 652.45(15)                                   |
| Density, gcm <sup>-3</sup>                            | 1.508                                        |
| Temperature, K                                        | 120                                          |
| T <sub>min</sub> /T <sub>max</sub>                    | 0.6102/0.7463                                |
| μ, mm <sup>-1</sup>                                   | 0.138                                        |
| Space group                                           | P2 <sub>1</sub> /c                           |
| Z                                                     | 4                                            |
| F(000)                                                | 312                                          |
| Reflections collected                                 | 9425                                         |
| Independent reflections                               | 2274                                         |
| Reflections (I>2σ(I))                                 | 1852                                         |
| Parameters                                            | 94                                           |
| R <sub>int</sub>                                      | 0.0357                                       |
| 2θ <sub>min</sub> - 2θ <sub>max</sub> , °             | 4.240 - 64.108                               |
| wR <sub>2</sub> (all reflections)                     | 0.0970                                       |
| R <sub>1</sub> (I>σ(I))                               | 0.0366                                       |
| GOF                                                   | 1.044                                        |
| ρ <sub>min</sub> /ρ <sub>max</sub> , eÅ <sup>-3</sup> | -0.253/0.414                                 |
| Restraints                                            | 0                                            |

Single crystal X-ray studies of **2m** were carried out in Center for molecule composition studies of INEOS RAS.

The structures were solved by direct method and refined in anisotropic approximation for non-hydrogen atoms. Hydrogens atoms of methyl, methylene and aromatic fragments were calculated according to those idealized geometry and refined with constraints applied to C-H lengths and equivalent displacement parameters ( $U_{eq}(H) = 1.2U_{eq}(X)$ , X - central atom of  $XH_2$  group;  $U_{eq}(H) = 1.5U_{eq}(Y)$ , Y - central atom of  $YH_3$  group). All structures were solved with the ShelXT<sup>18</sup> program and refined with the ShelXL<sup>19</sup> program. Molecular graphics was drawn using OLEX2<sup>20</sup> program.

CCDC 1980721 contains the supplementary crystallographic data for **2m**. These data can be obtained free of charge from The Cambridge Crystallographic Data Centre via <https://www.ccdc.cam.ac.uk/structures>.

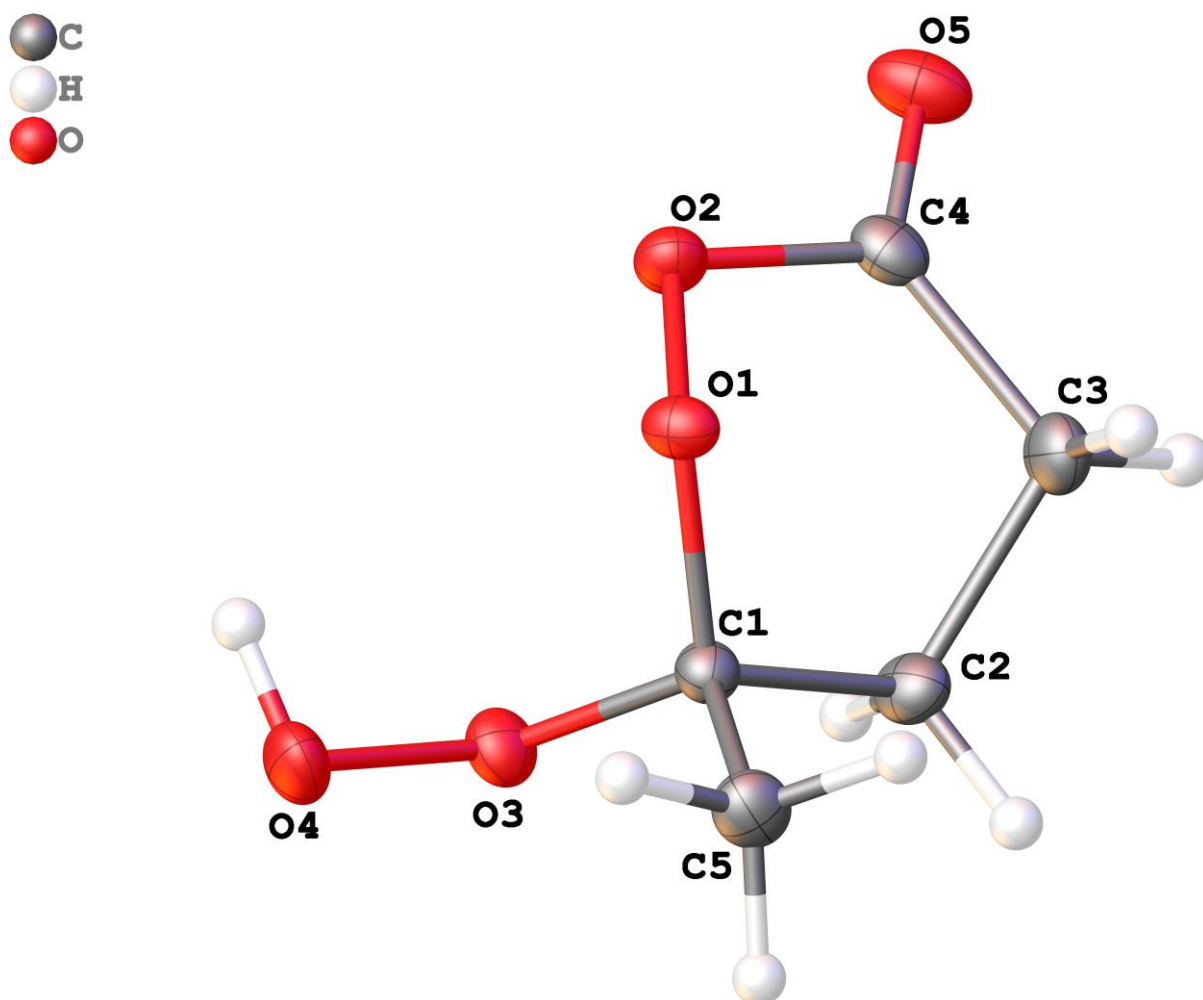

**Figure S1.** Molecular structure of **2m** presented in thermal ellipsoids.



## References

1. A. M. Tsedilin, A. N. Fakhrutdinov, D. B. Eremin, S. S. Zalesskiy, A. O. Chizhov, N. G. Kolotyrkina and V. P. Ananikov, *Mendeleev Commun.*, 2015, **25**, 454-456.
2. P. H. Dussault, *Safe use of Hydrogen Peroxide in the Organic Lab*, University of Nebraska–Lincoln, 2017.
3. B. Hurlocker, M. R. Miner and K. A. Woerpel, *Org. Lett.*, 2014, **16**, 4280-4283.
4. C. Kashima, Y. Shirahata and Y. Tsukamoto, *Heterocycles*, 2001, **54**, 309-317.
5. C. Kumru, T. Classen and J. Pietruszka, *ChemCatChem*, 2018, **10**, 4917-4926.
6. S. Xue, Y.-K. Liu, L.-Z. Li and Q.-X. Guo, *J. Org. Chem.*, 2005, **70**, 8245-8247.
7. H. Maeda, N. Hino, Y. Yamauchi and H. Ohmori, *Chem. Pharm. Bull.*, 2000, **48**, 1196-1199.
8. Y. Li, J.-Q. Shang, X.-X. Wang, W.-J. Xia, T. Yang, Y. Xin and Y.-M. Li, *Org. Lett.*, 2019, **21**, 2227-2230.
9. E. C. Taylor, R. A. Conley, A. H. Katz and A. McKillop, *J. Org. Chem.*, 1984, **49**, 3840-3841.
10. S. Hizal, M. Hejl, M. A. Jakupec, M. Galanski and B. K. Keppler, *Inorg. Chim. Acta*, 2019, **491**, 76-83.
11. M. L. Kantam, R. Kishore, J. Yadav, M. Sudhakar and A. Venugopal, *Adv. Synth. Catal.*, 2012, **354**, 663-669.
12. J. Luo, B. Hu, A. Sam and T. L. Liu, *Org. Lett.*, 2018, **20**, 361-364.
13. X.-J. Xu, F. Wang, T. Zeng, J. Lin, J. Liu, Y.-Q. Chang, P.-H. Sun and W.-M. Chen, *Eur. J. Med. Chem.*, 2018, **144**, 164-178.
14. M. Stoecklmayer, *Scientia Pharmaceutica*, 1955, **23**, 212-226.
15. M. J. Frisch, G. W. Trucks, H. B. Schlegel, G. E. Scuseria, M. A. Robb, J. R. Cheeseman, G. Scalmani, V. Barone, B. Mennucci, G. A. Petersson, H. Nakatsuji, M. Caricato, X. Li, H. P. Hratchian, A. F. Izmaylov, J. Bloino, G. Zheng, J. L. Sonnenberg, M. Hada, M. Ehara, K. Toyota, R. Fukuda, J. Hasegawa, M. Ishida, T. Nakajima, Y. Honda, O. Kitao, H. Nakai, T. Vreven, J. A. J. Montgomery, J. E. Peralta, F. Ogliaro, M. Bearpark, J. J. Heyd, E. Brothers, K. N. Kudin, V. N. Staroverov, R. Kobayashi, J. Normand, K. Raghavachari, A. Rendell, J. C. Burant, S. S. Iyengar, J. Tomasi, M. Cossi, N. Rega, M. J. Millam, M. Klene, J. E. Knox, J. B. Cross, V. Bakken, C. Adamo, J. Jaramillo, R. Gomperts, R. E. Stratmann, O. Yazyev, A. J. Austin, R. Cammi, C. Pomelli, J. W. Ochterski, R. L. Martin, K. Morokuma, V. G. Zakrzewski, G. A. Voth, P. Salvador, J. J. Dannenberg, S. Dapprich, A. D. Daniels, Farkas, J. B. Foresman, J. V. Ortiz, J. Cioslowski and F. D. J., *Gaussian 09, Revision E.01*, Gaussian, Inc., Wallingford CT, 2013.
16. CYLview\_Visualization\_Software, <https://www.cylview.org/> (accessed Feb 10, 2020).
17. IQmol\_Molecular\_Viewer, <http://iqmol.org/> (accessed Feb 10, 2020).
18. G. Sheldrick, *Acta Cryst. A*, 2015, **71**, 3-8.
19. G. M. Sheldrick, *Acta Cryst. C*, 2015, **71**, 3-8.
20. O. V. Dolomanov, L. J. Bourhis, R. J. Gildea, J. A. K. Howard and H. Puschmann, *J. Appl. Crystallogr.*, 2009, **42**, 339-341.

# NMR of starting $\gamma$ -ketoesters 1

## $^1\text{H}$ NMR of ethyl 3-benzyl-4-oxopentanoate, 1a

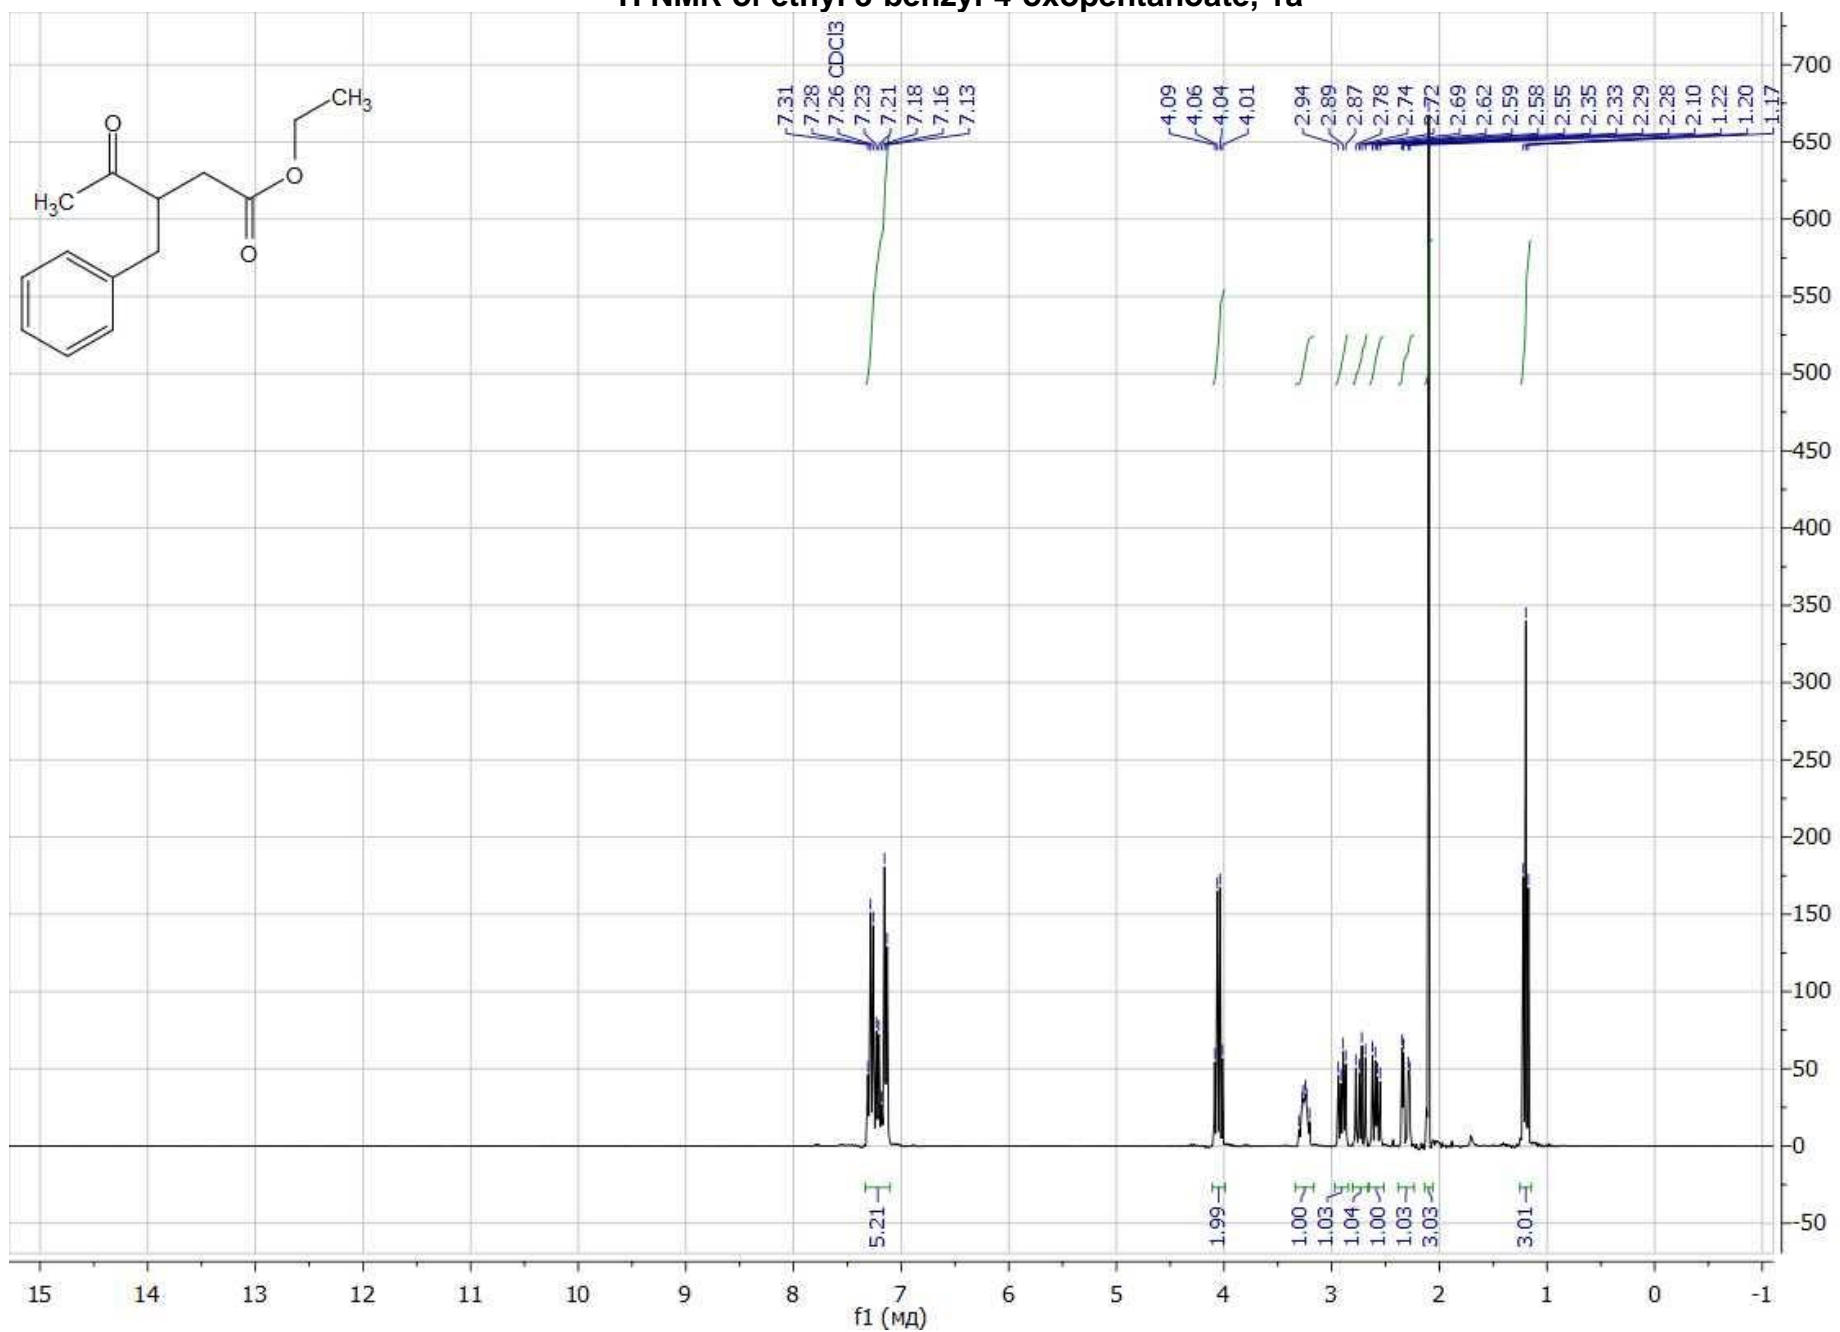

<sup>13</sup>C NMR of ethyl 3-benzyl-4-oxopentanoate, 1a

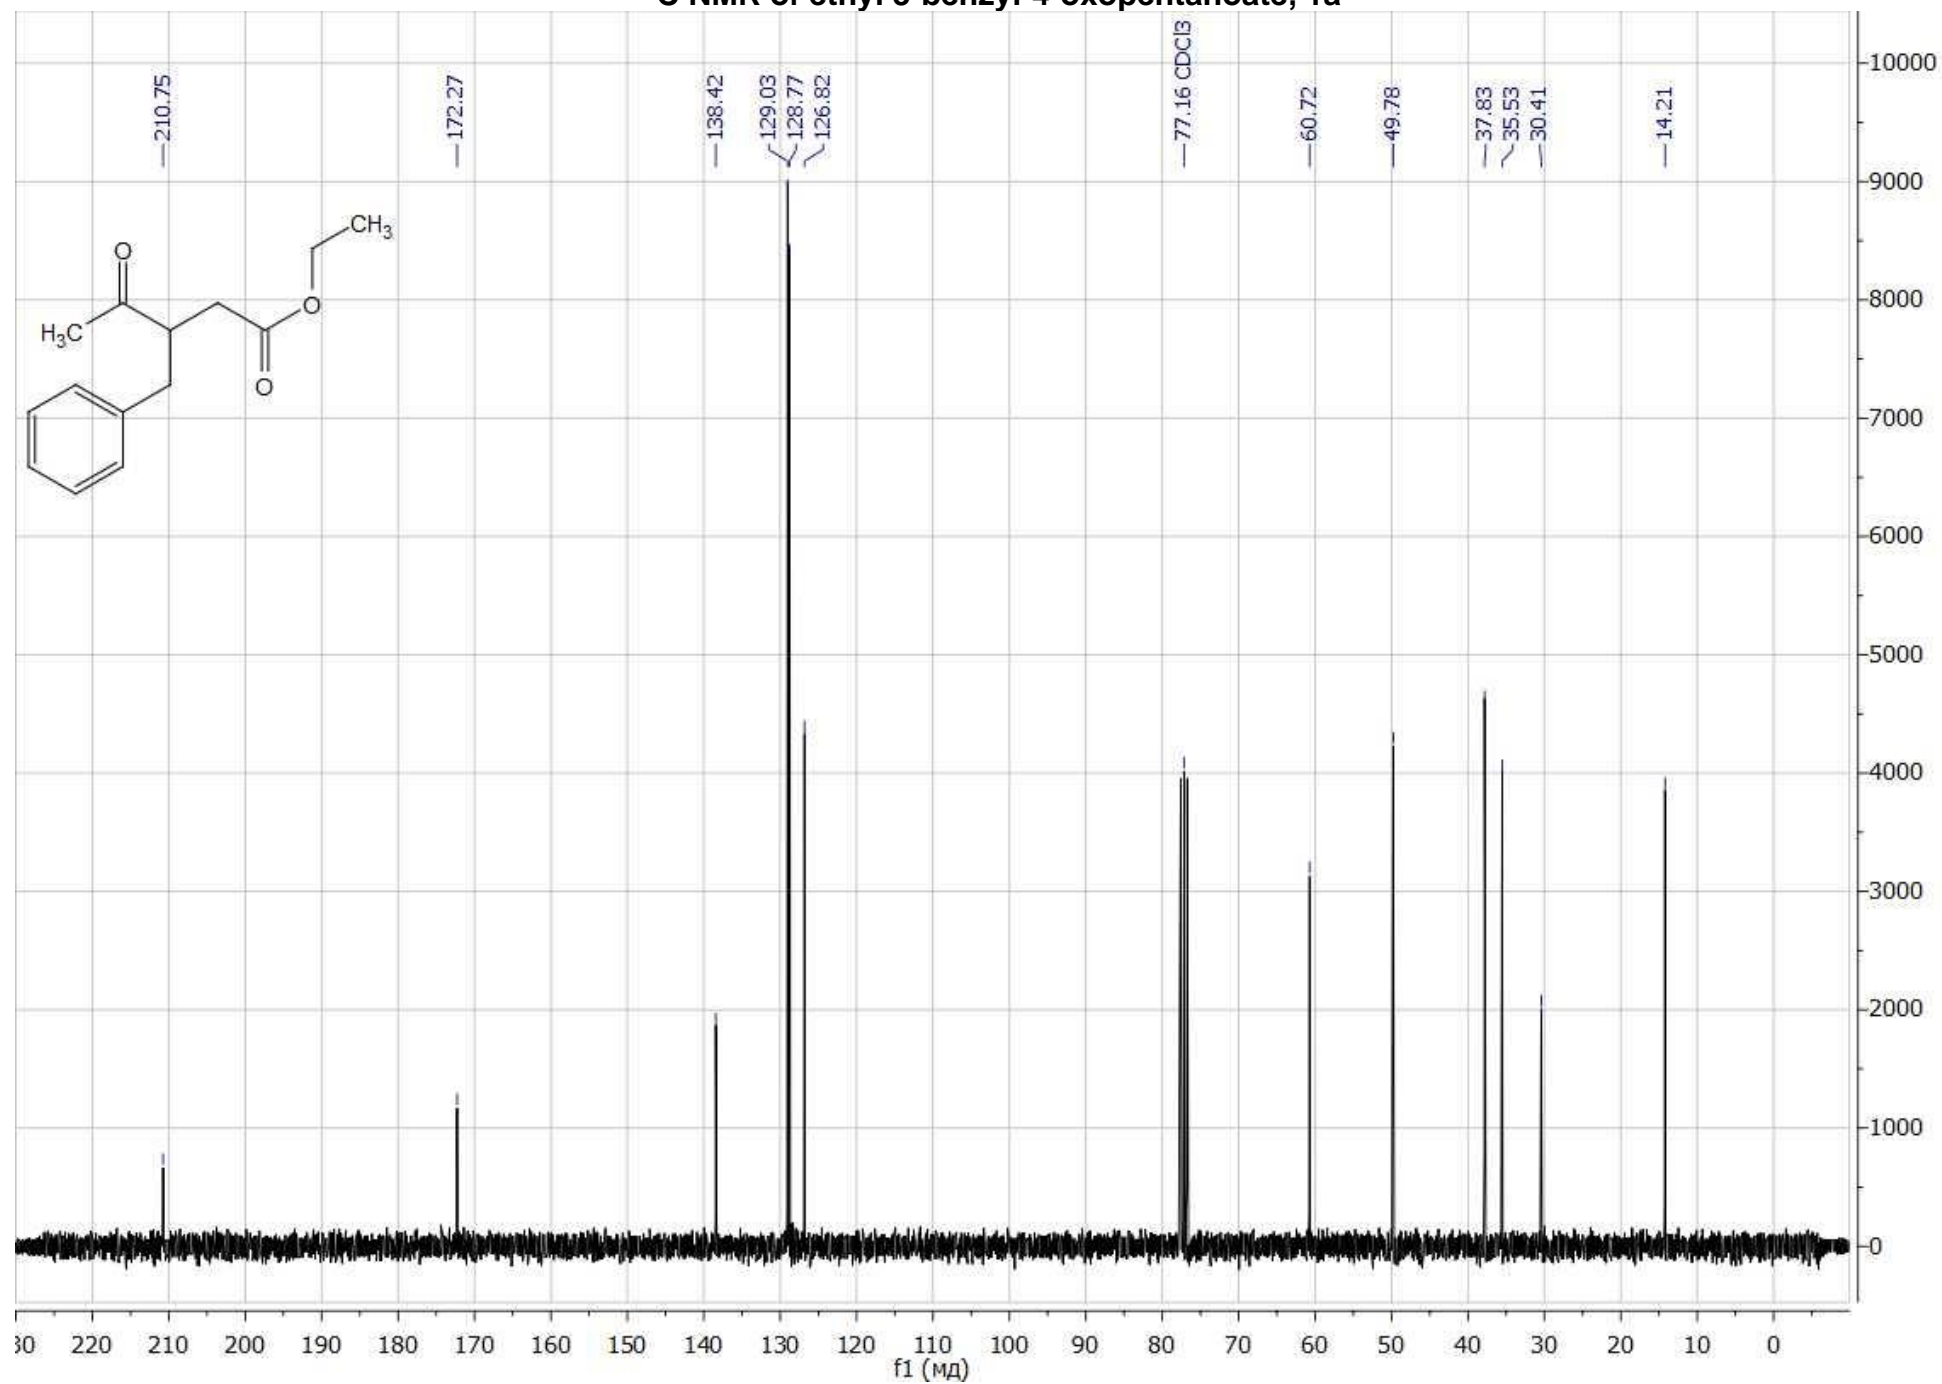

<sup>1</sup>H NMR of ethyl 3-(4-nitrobenzyl)-4-oxopentanoate, 1b

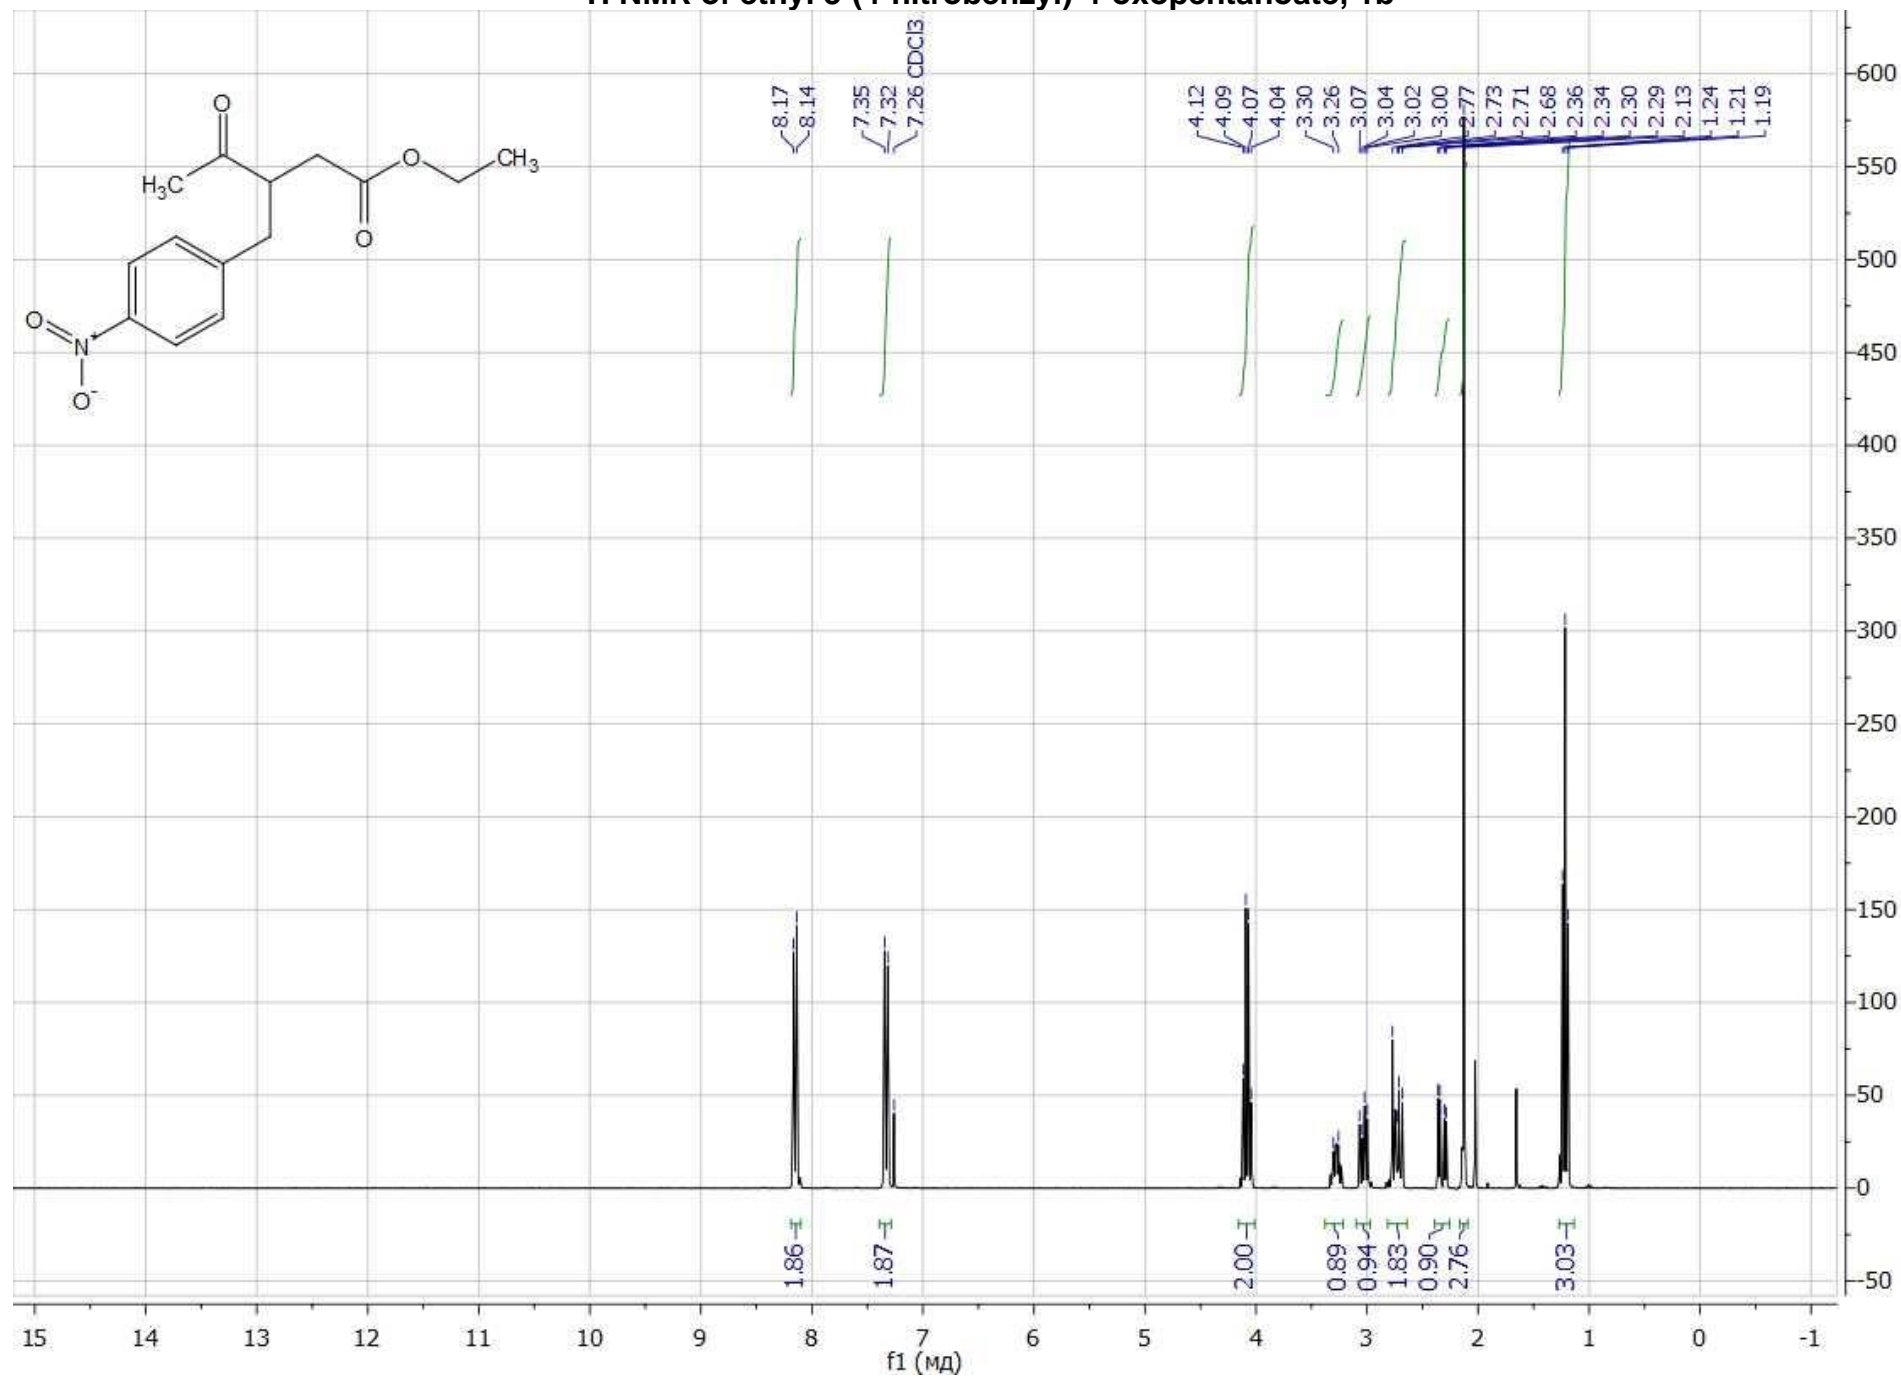

<sup>13</sup>C NMR of ethyl 3-(4-nitrobenzyl)-4-oxopentanoate, 1b

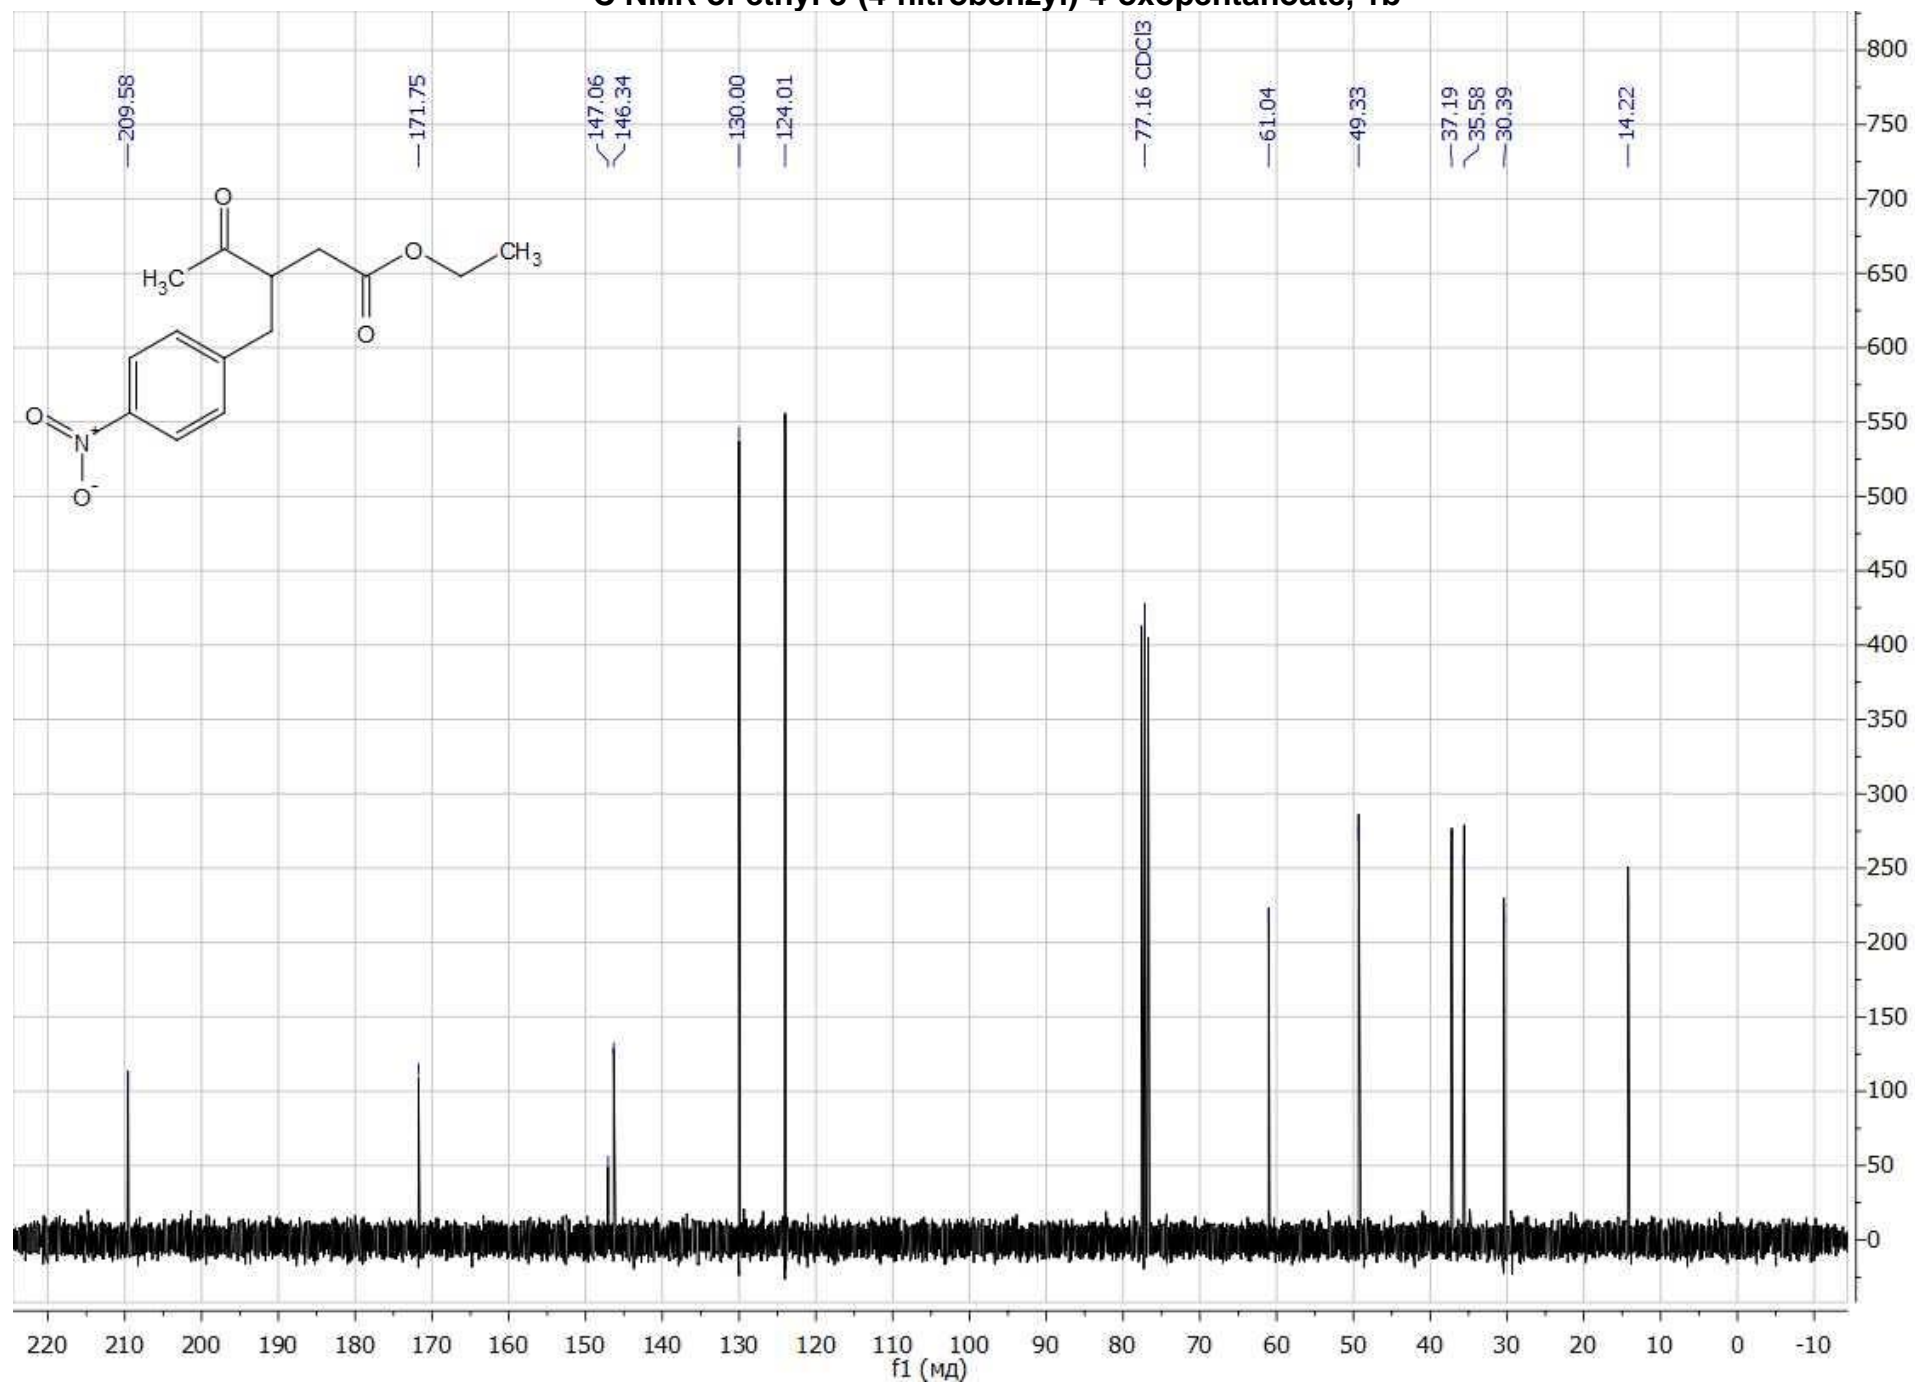

<sup>1</sup>H NMR of ethyl 3-(4-chlorobenzyl)-4-oxopentanoate, 1c

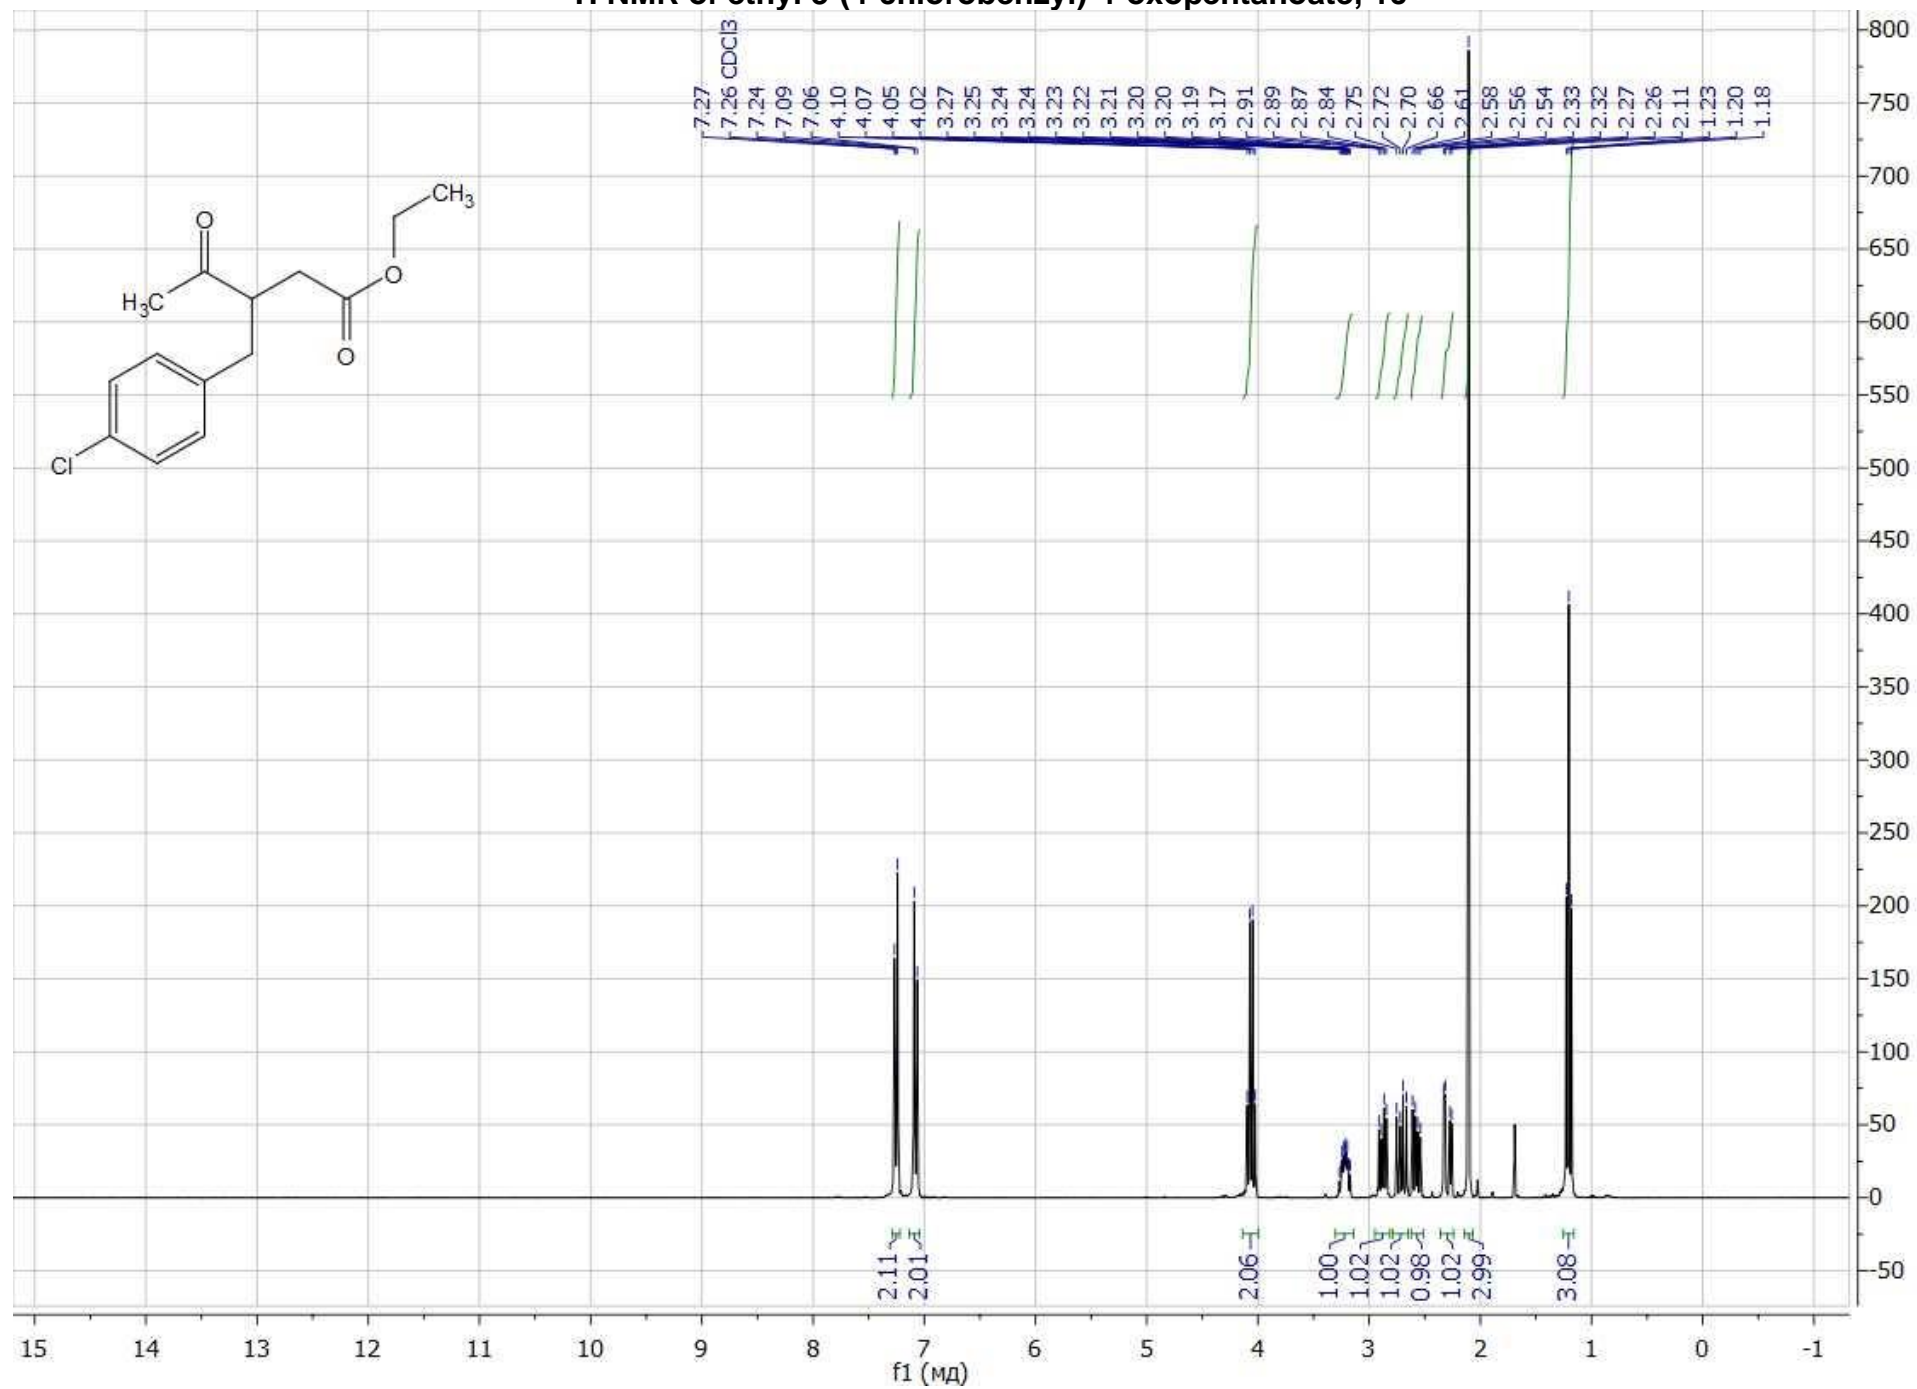

<sup>13</sup>C NMR of ethyl 3-(4-chlorobenzyl)-4-oxopentanoate, 1c

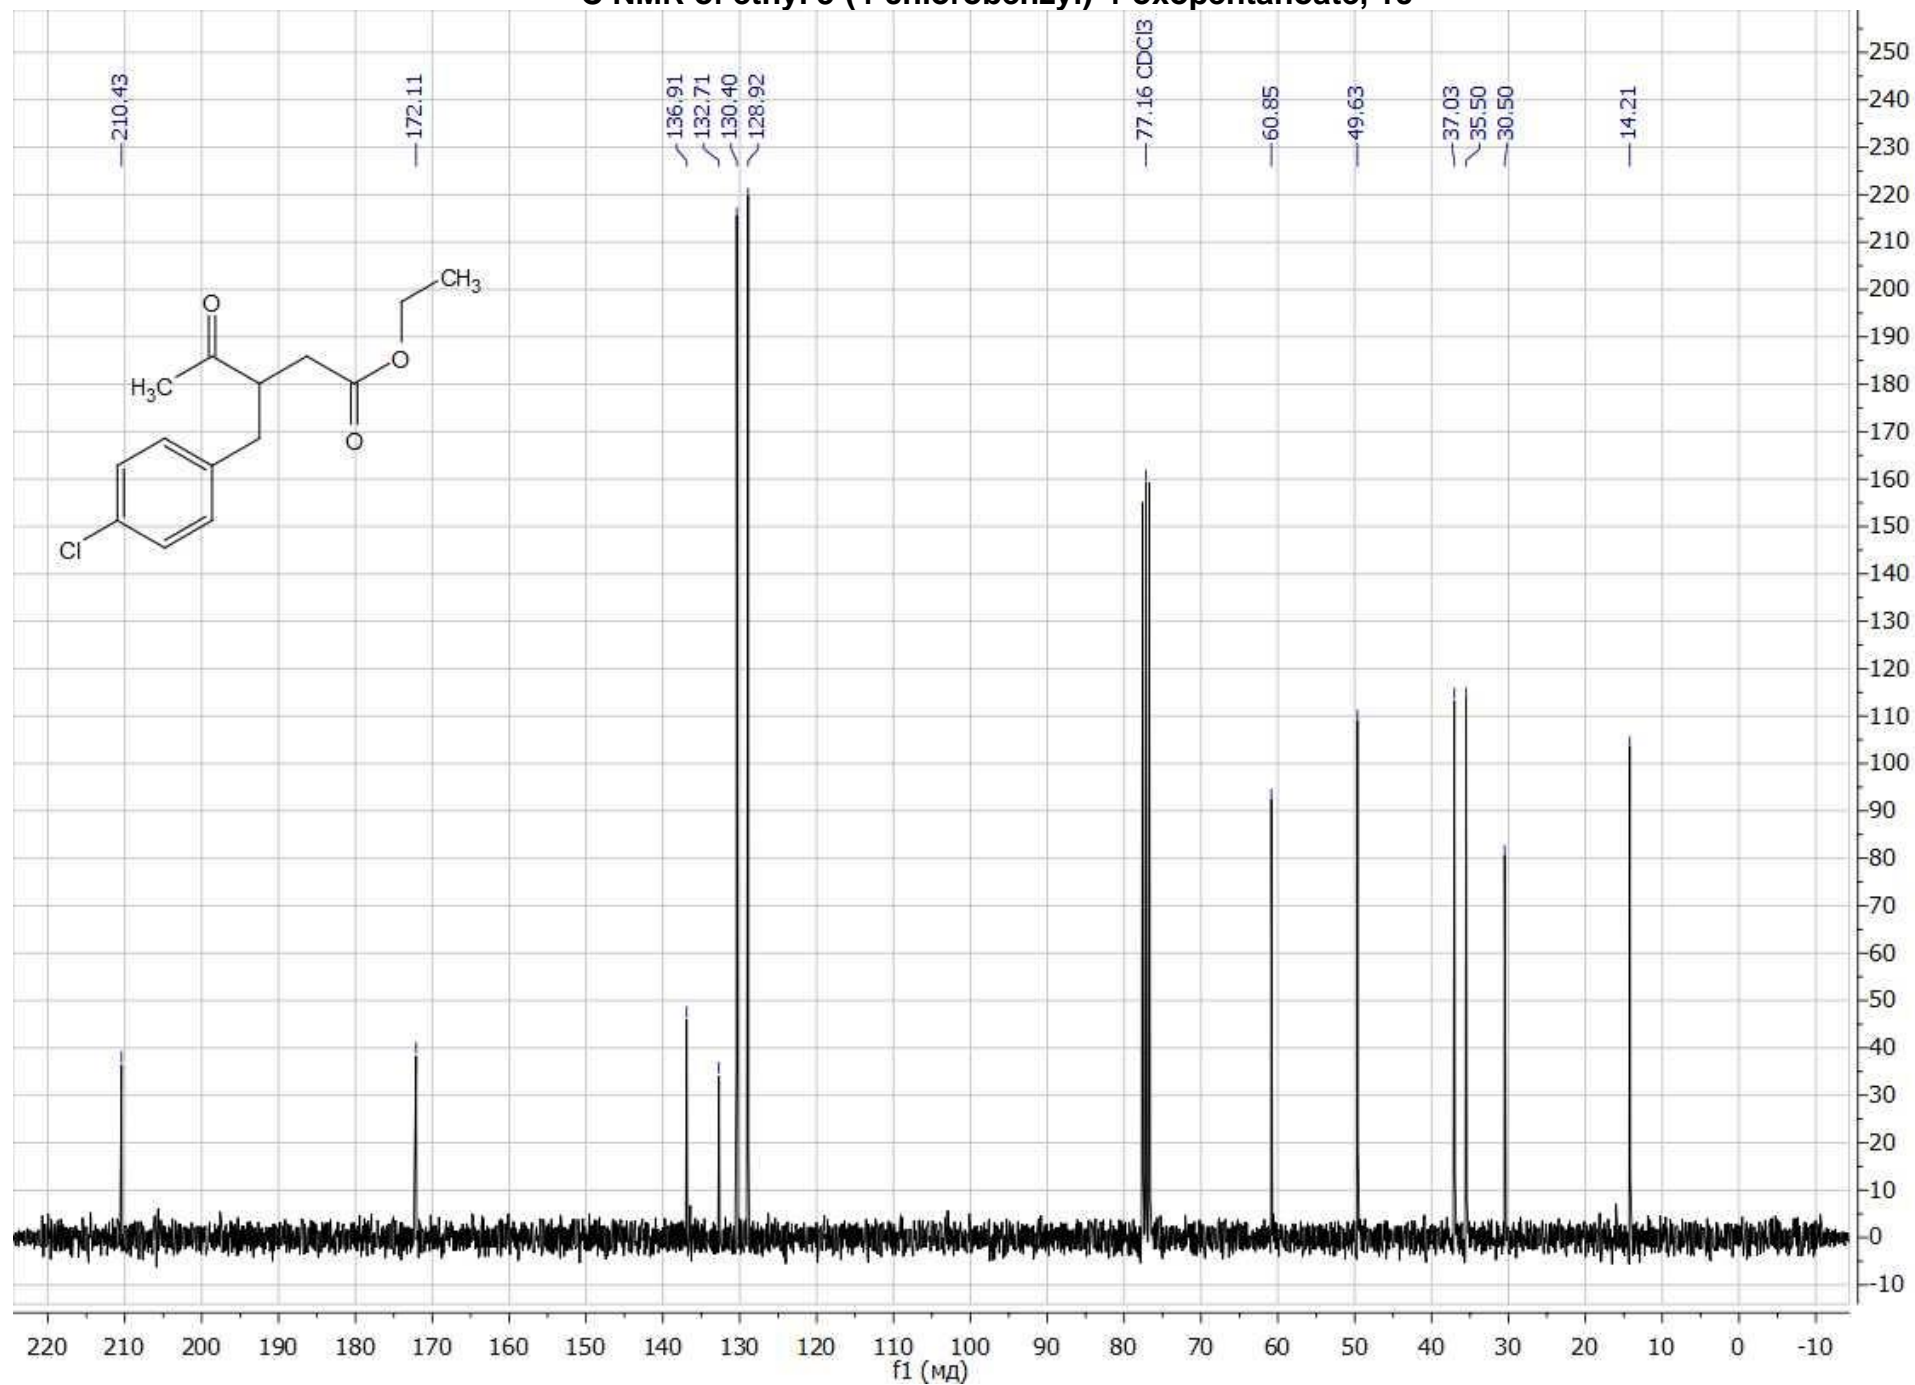

<sup>1</sup>H NMR of ethyl 3-(4-bromobenzyl)-4-oxopentanoate, 1d

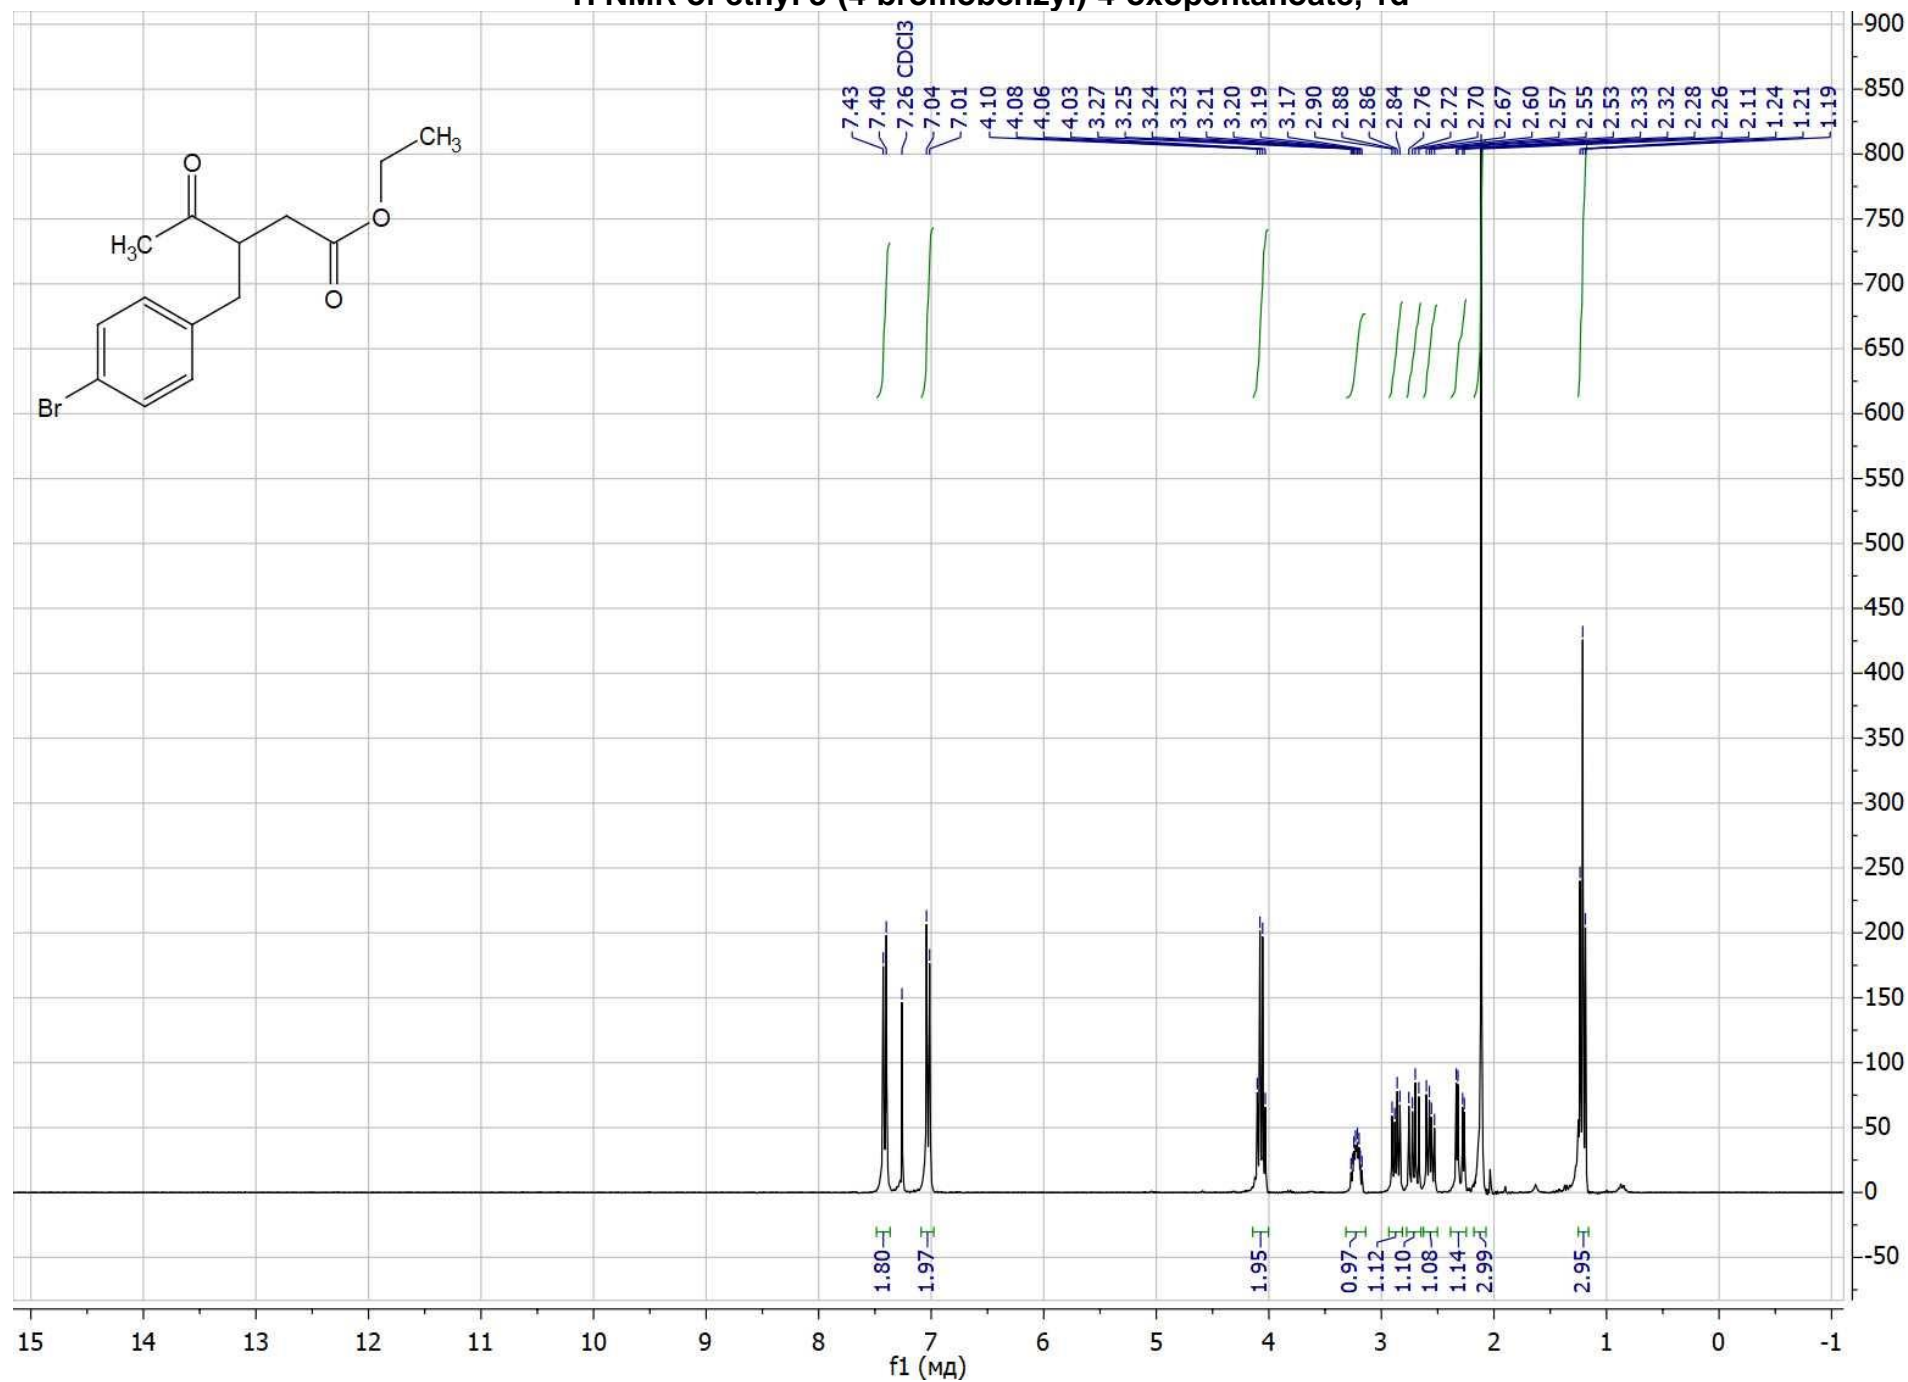



<sup>13</sup>C NMR of ethyl 3-(4-bromobenzyl)-4-oxopentanoate, 1d

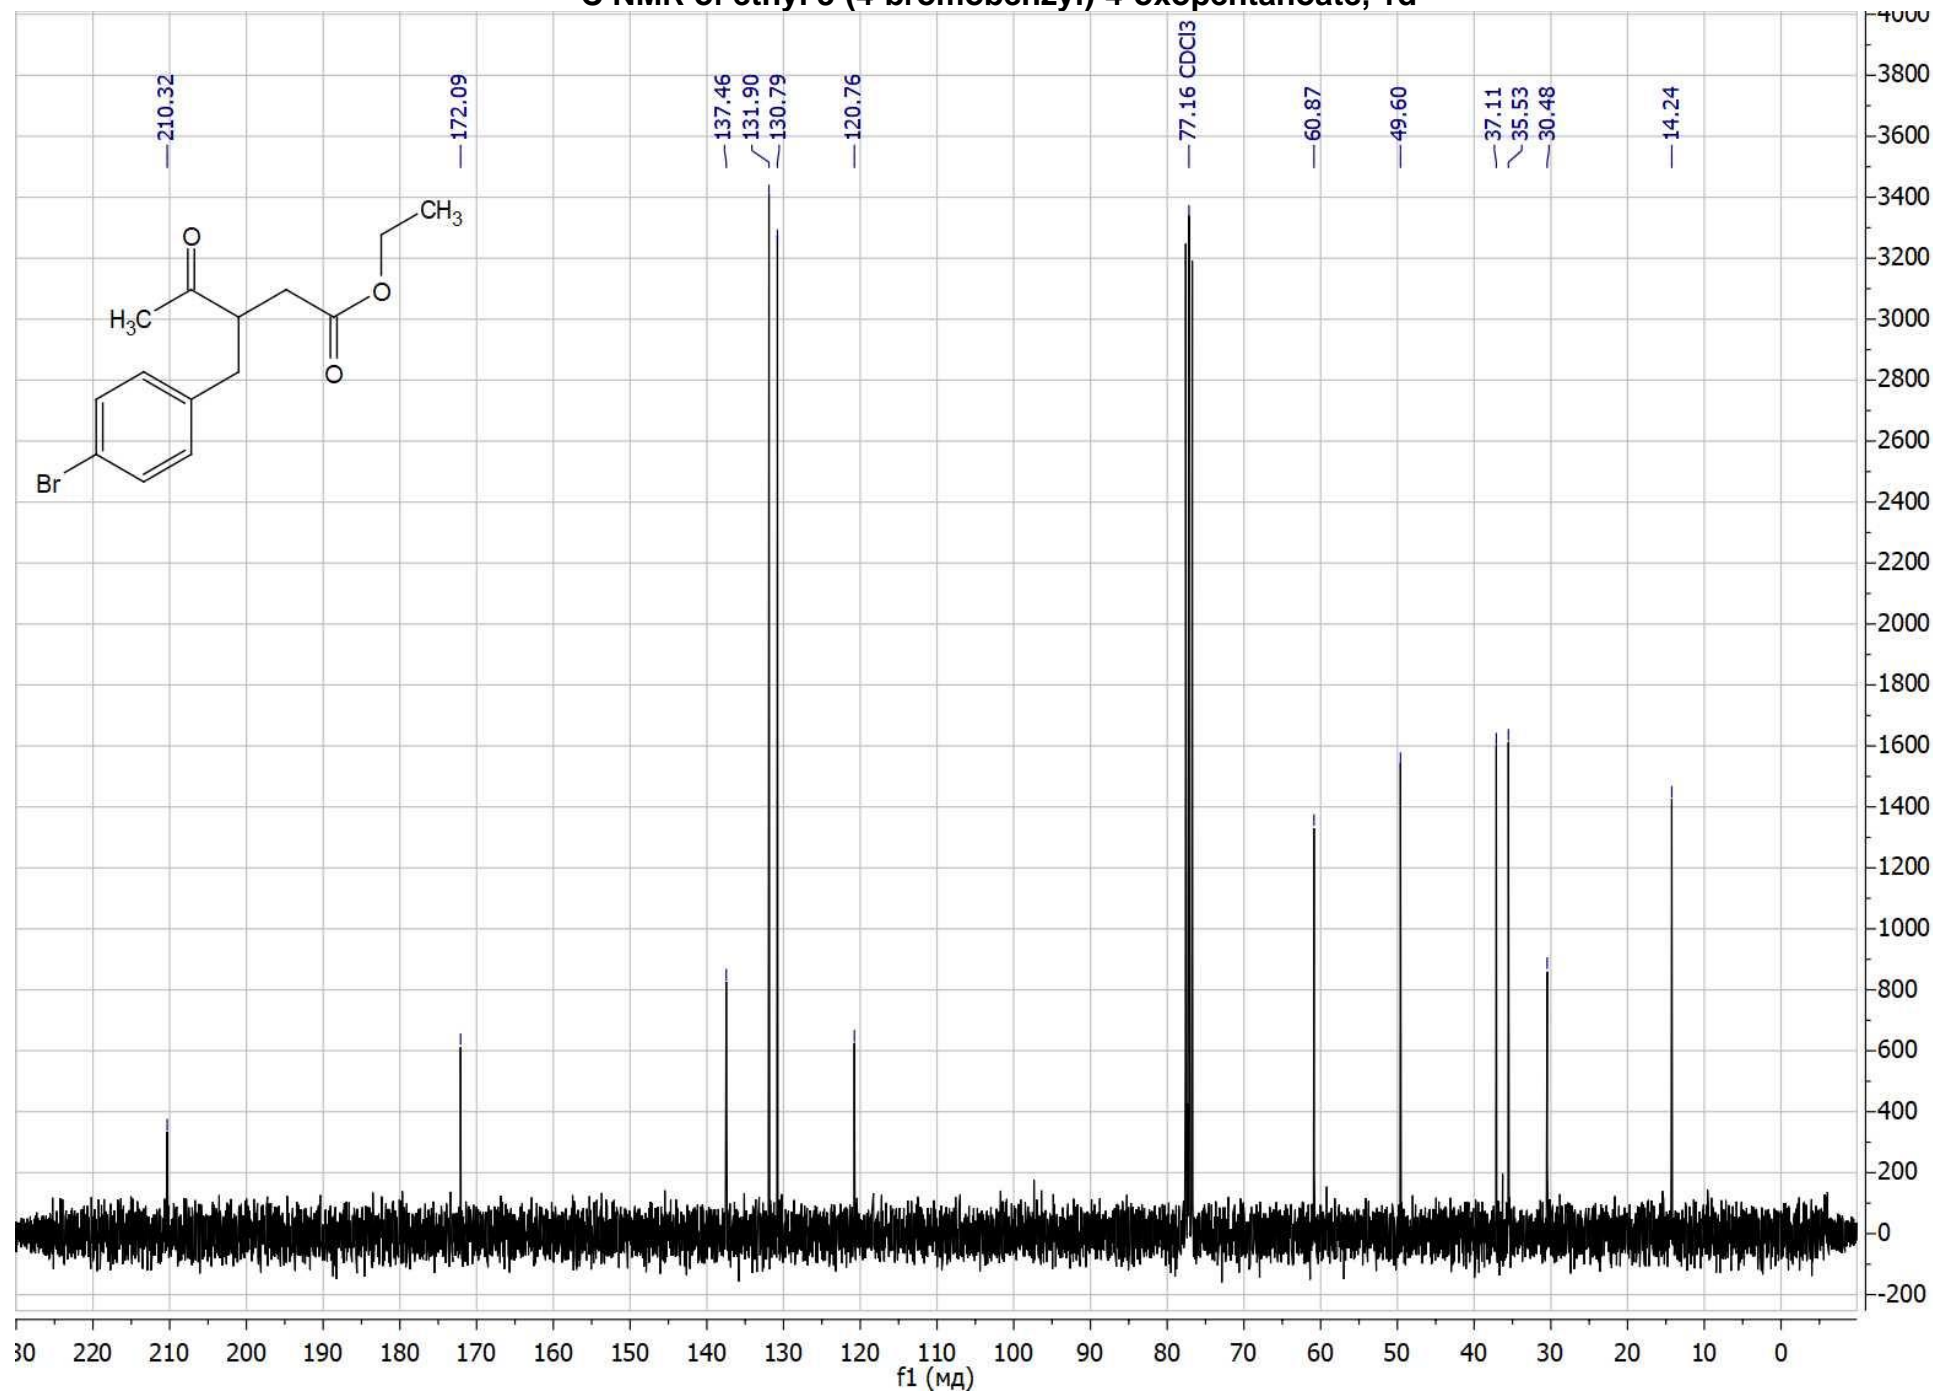

<sup>1</sup>H NMR of ethyl 3-(4-(*tert*-butyl)benzyl)-4-oxopentanoate, 1e

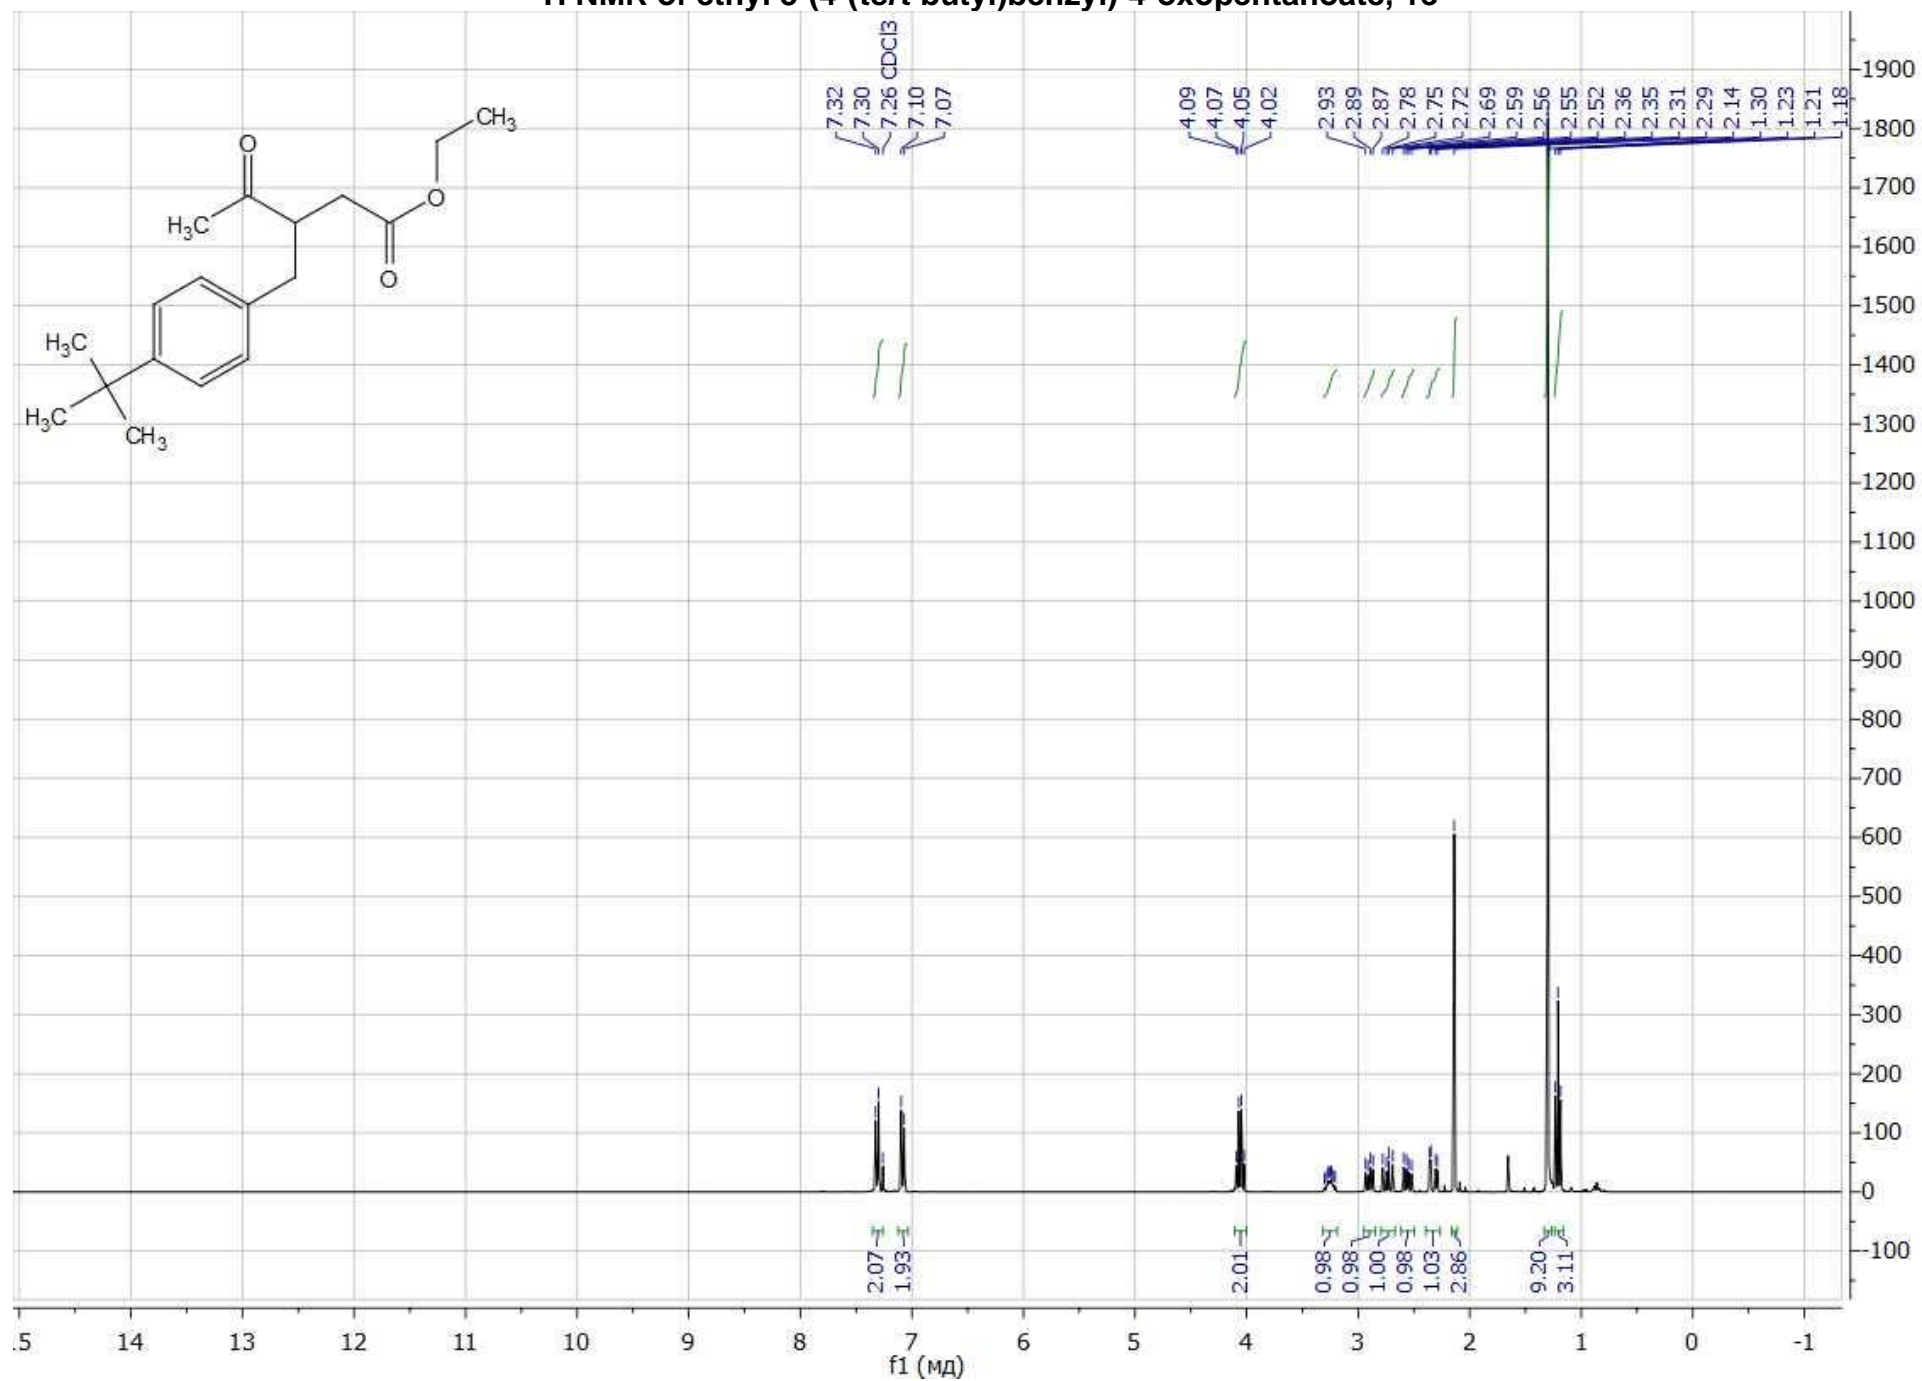

<sup>13</sup>C NMR of ethyl 3-(4-(*tert*-butyl)benzyl)-4-oxopentanoate, 1e

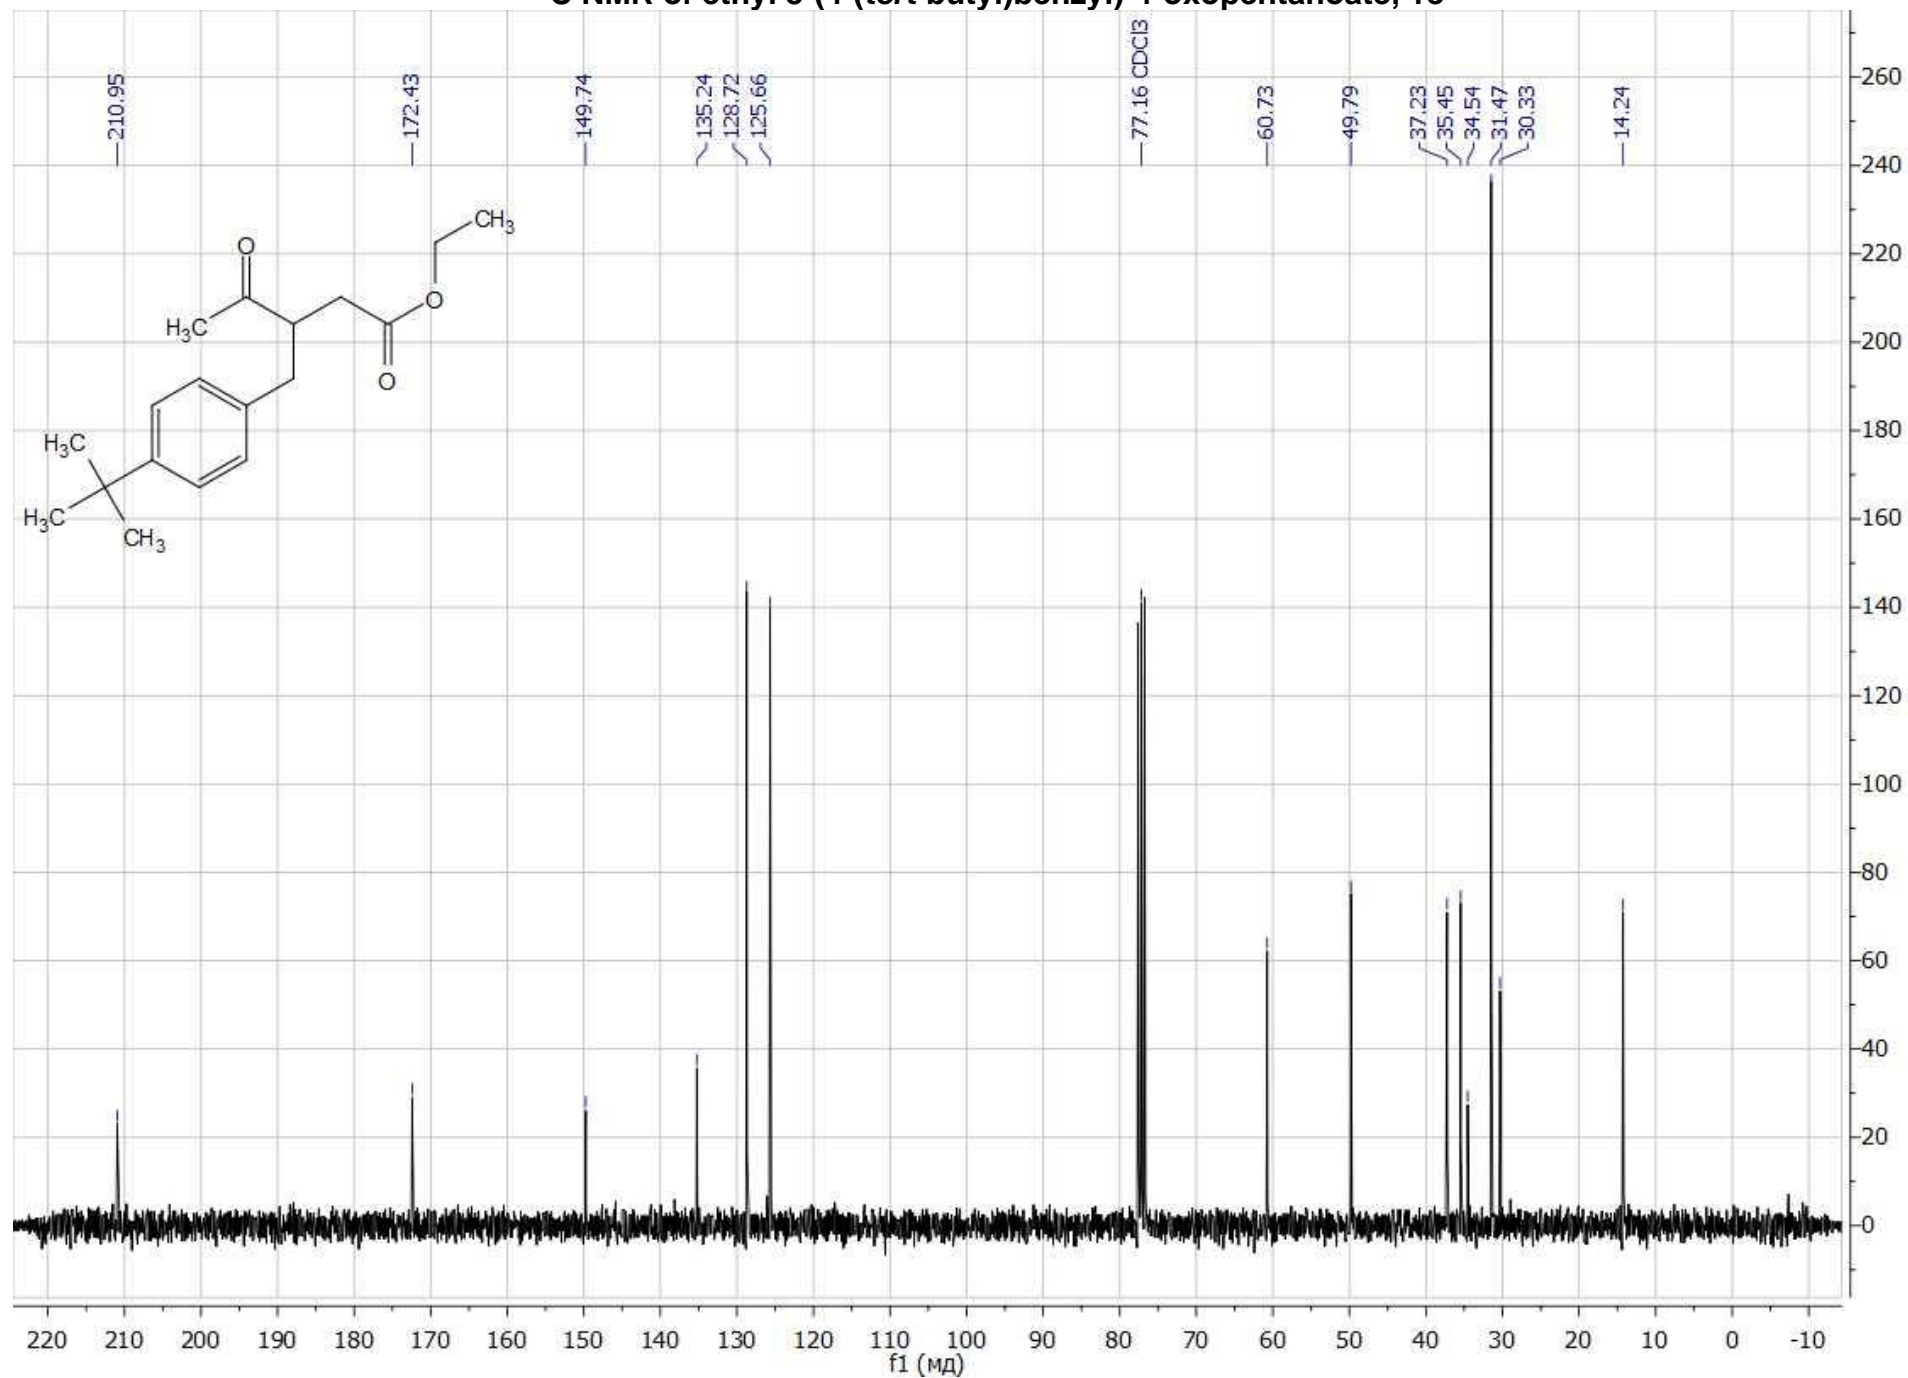

<sup>1</sup>H NMR of ethyl 3-(4-methylbenzyl)-4-oxopentanoate, 1f

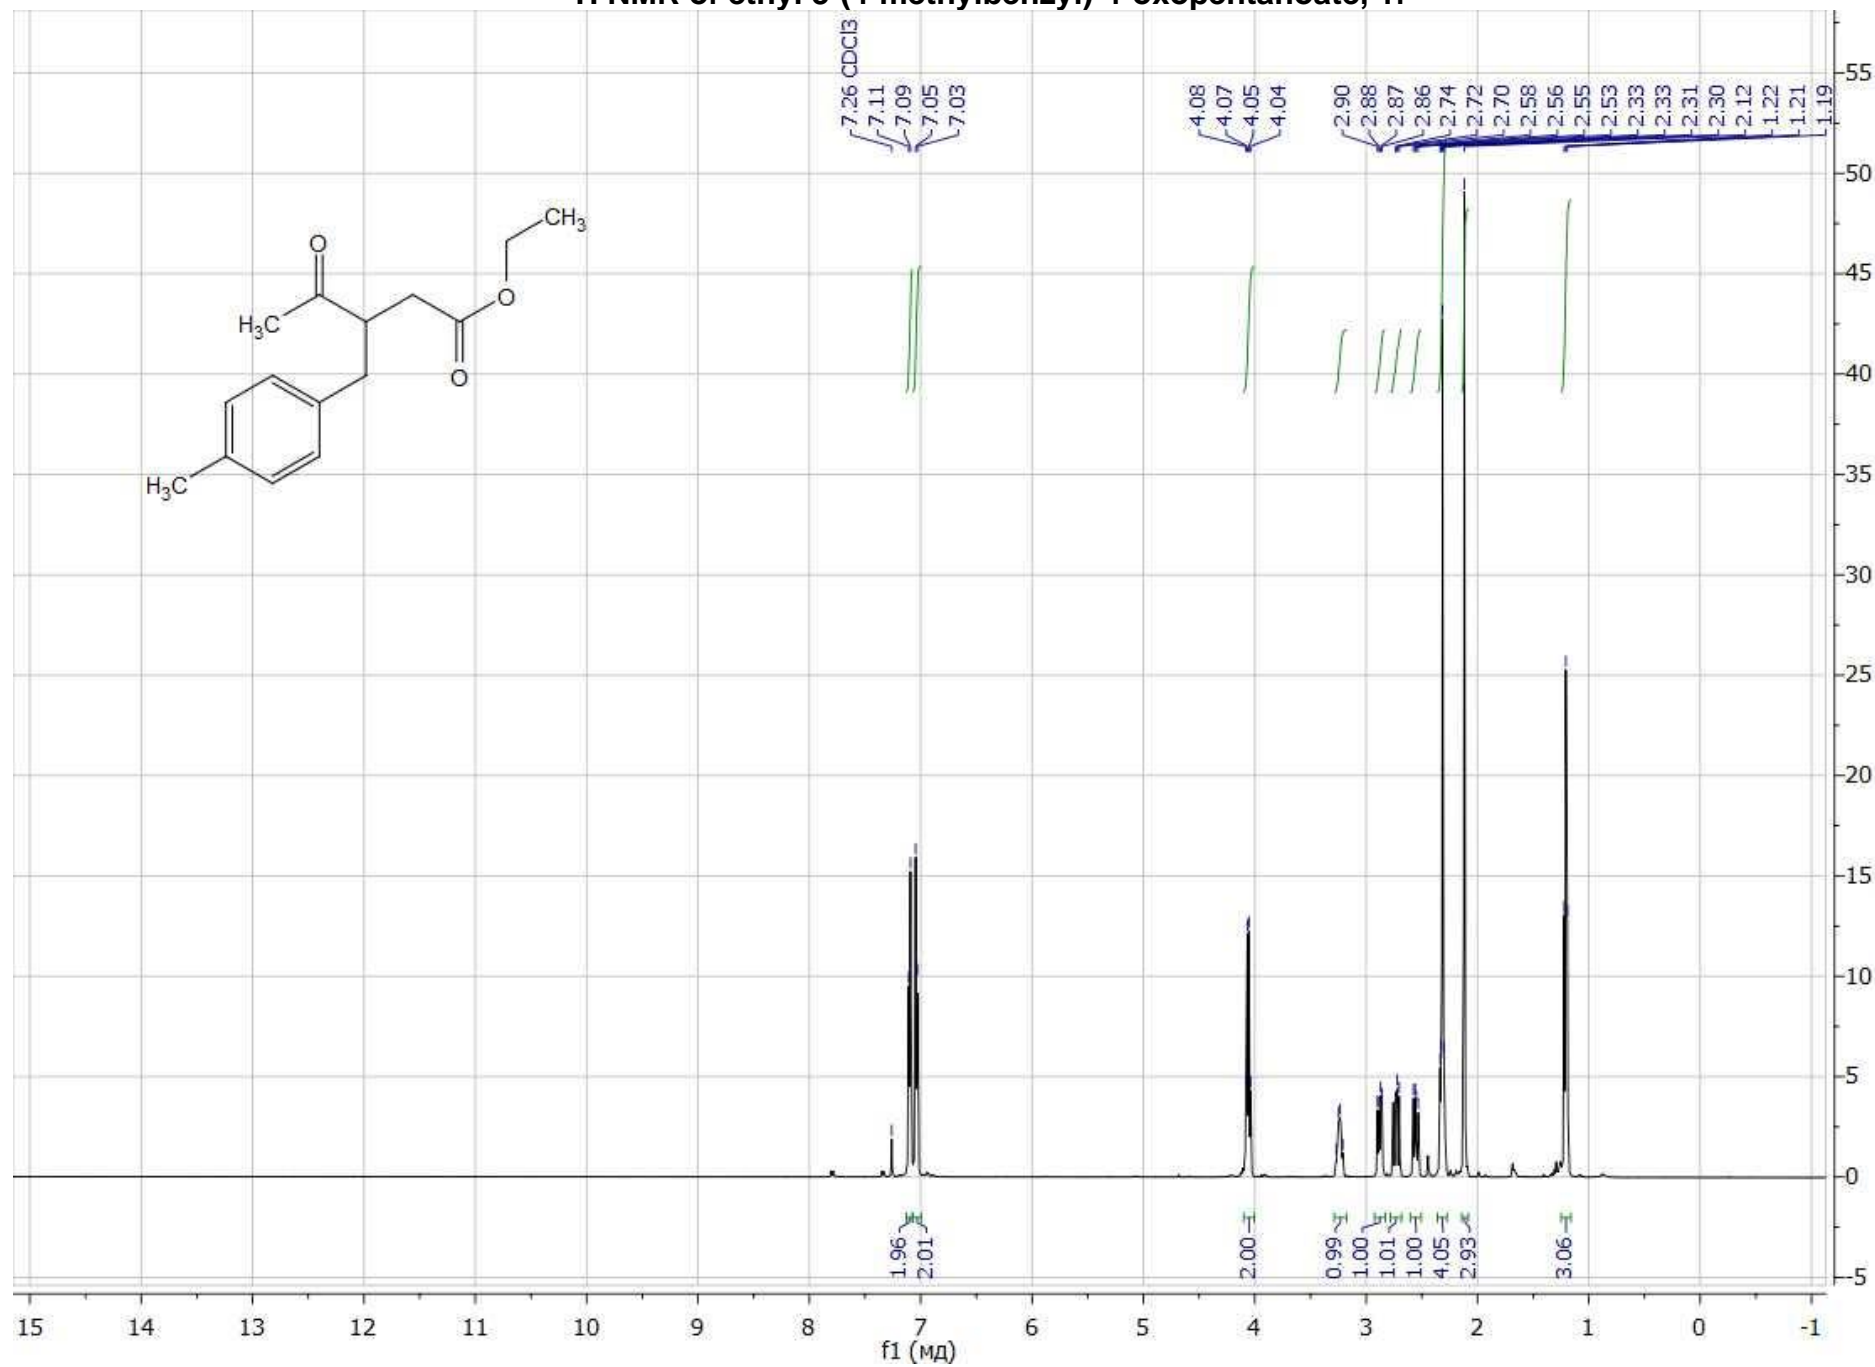

<sup>13</sup>C NMR of ethyl 3-(4-methylbenzyl)-4-oxopentanoate, 1f

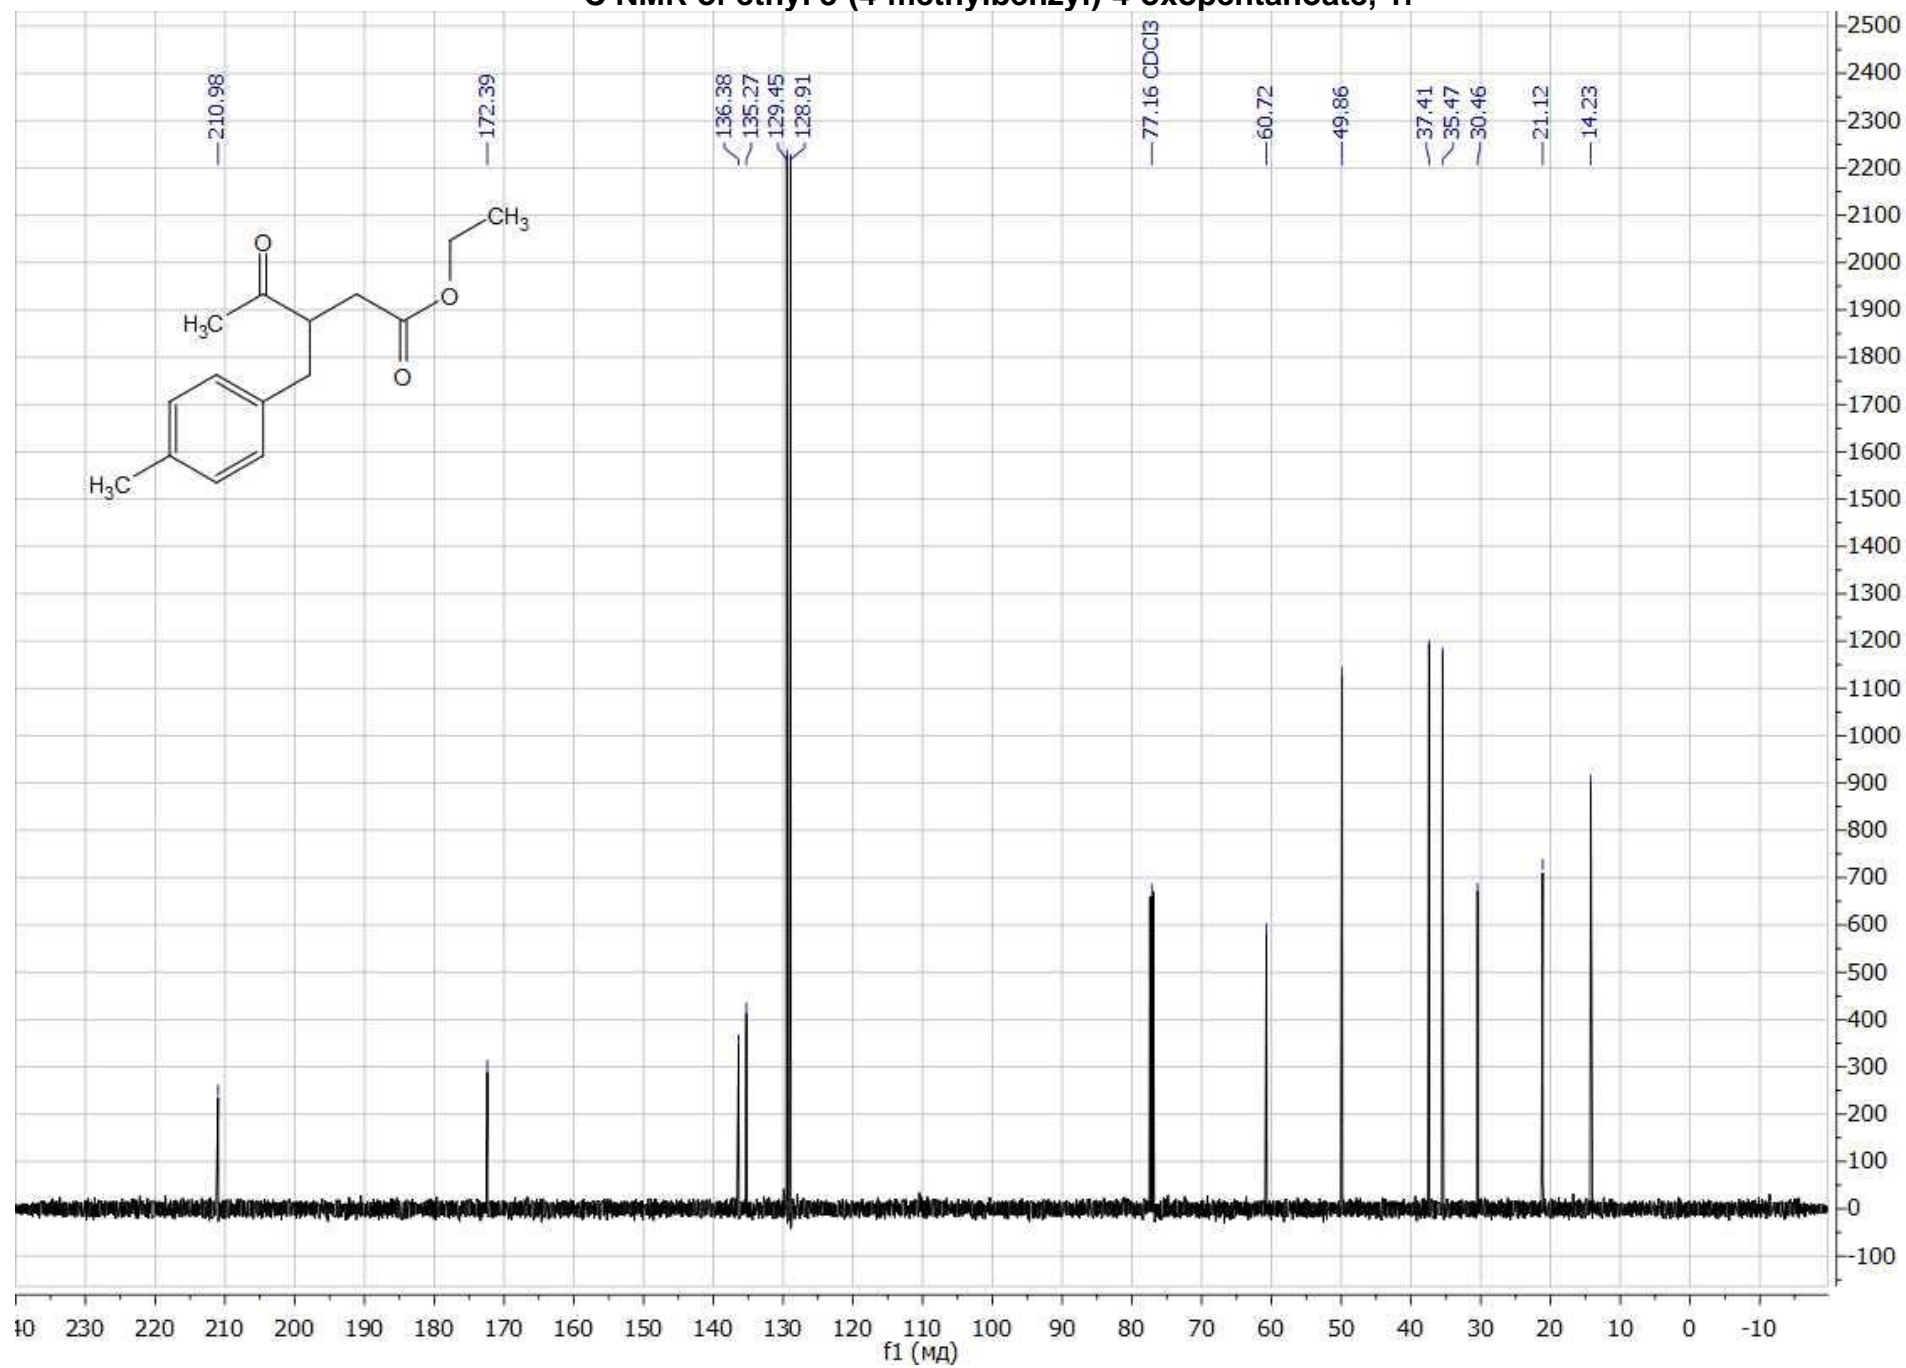

<sup>1</sup>H NMR of ethyl 3-(3-methylbenzyl)-4-oxopentanoate, 1g

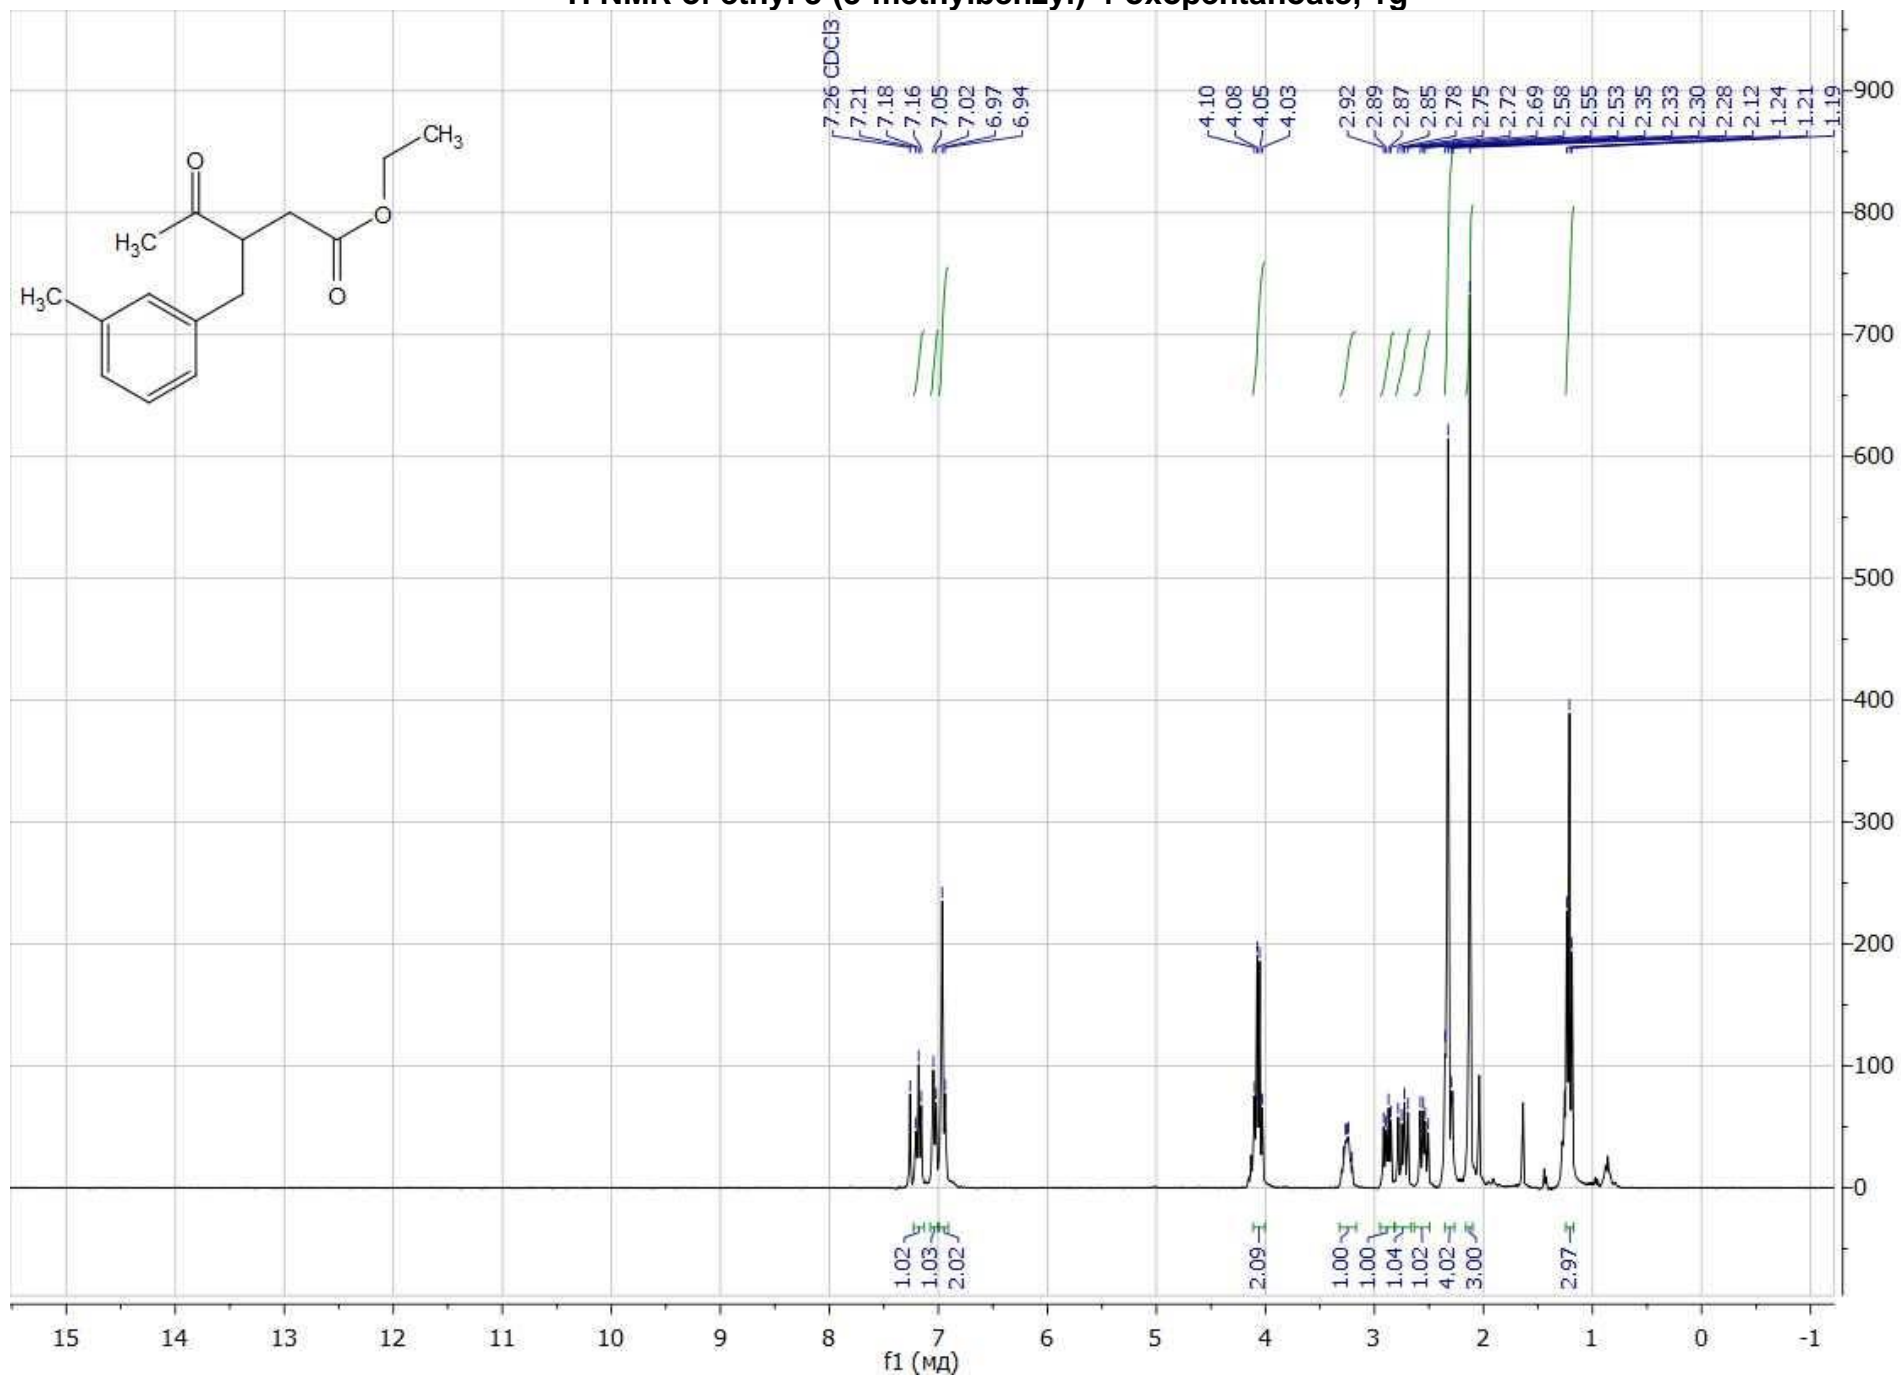

<sup>13</sup>C NMR of ethyl 3-(3-methylbenzyl)-4-oxopentanoate, 1g

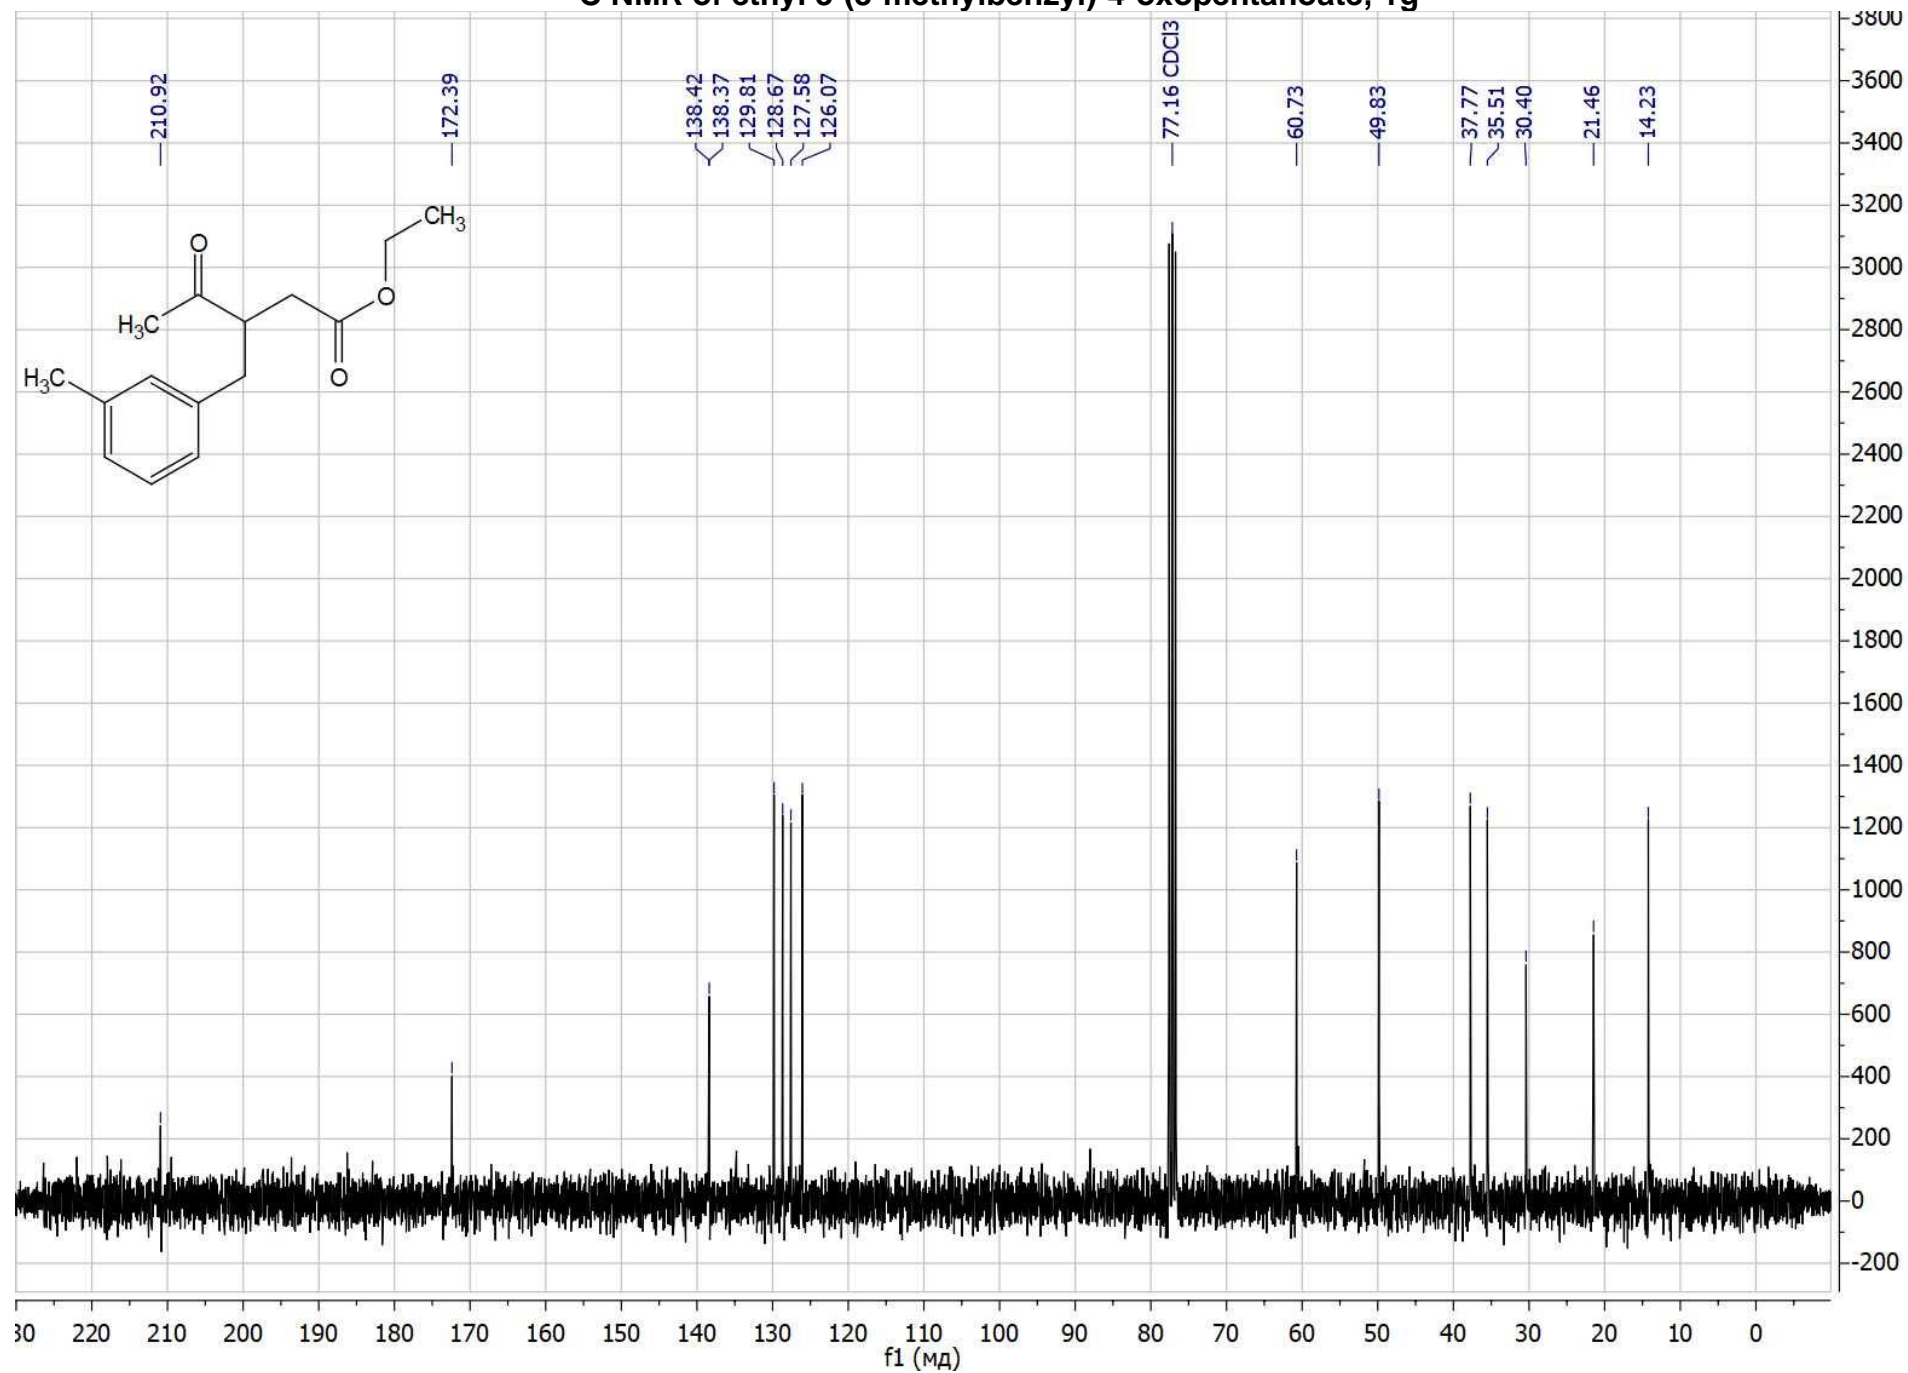

**<sup>1</sup>H NMR of ethyl 3-(3-methoxybenzyl)-4-oxopentanoate, 1h**

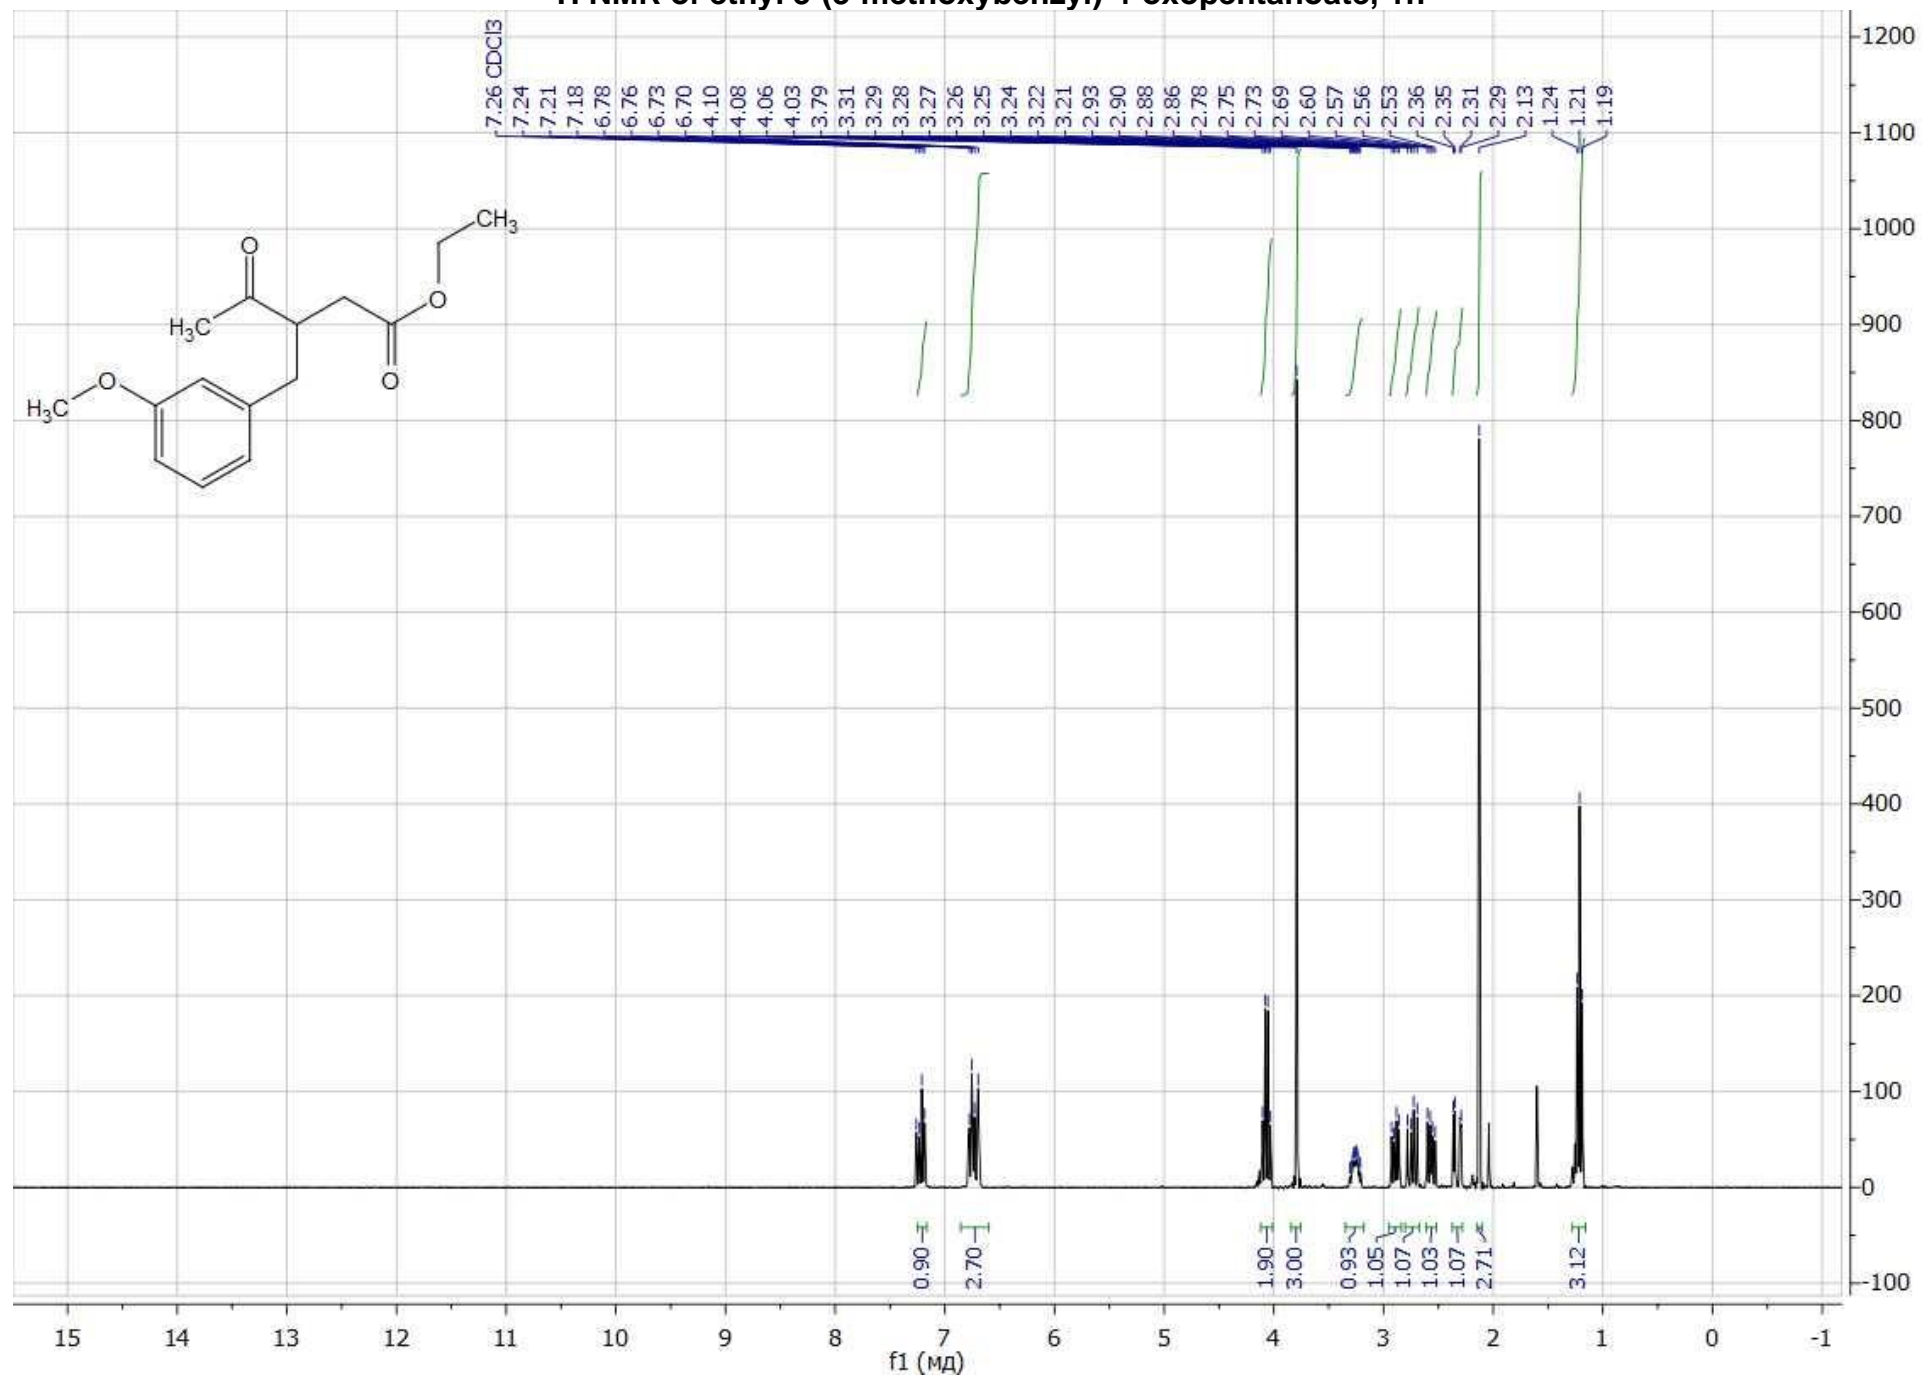



<sup>13</sup>C NMR of ethyl 3-(3-methoxybenzyl)-4-oxopentanoate, 1h

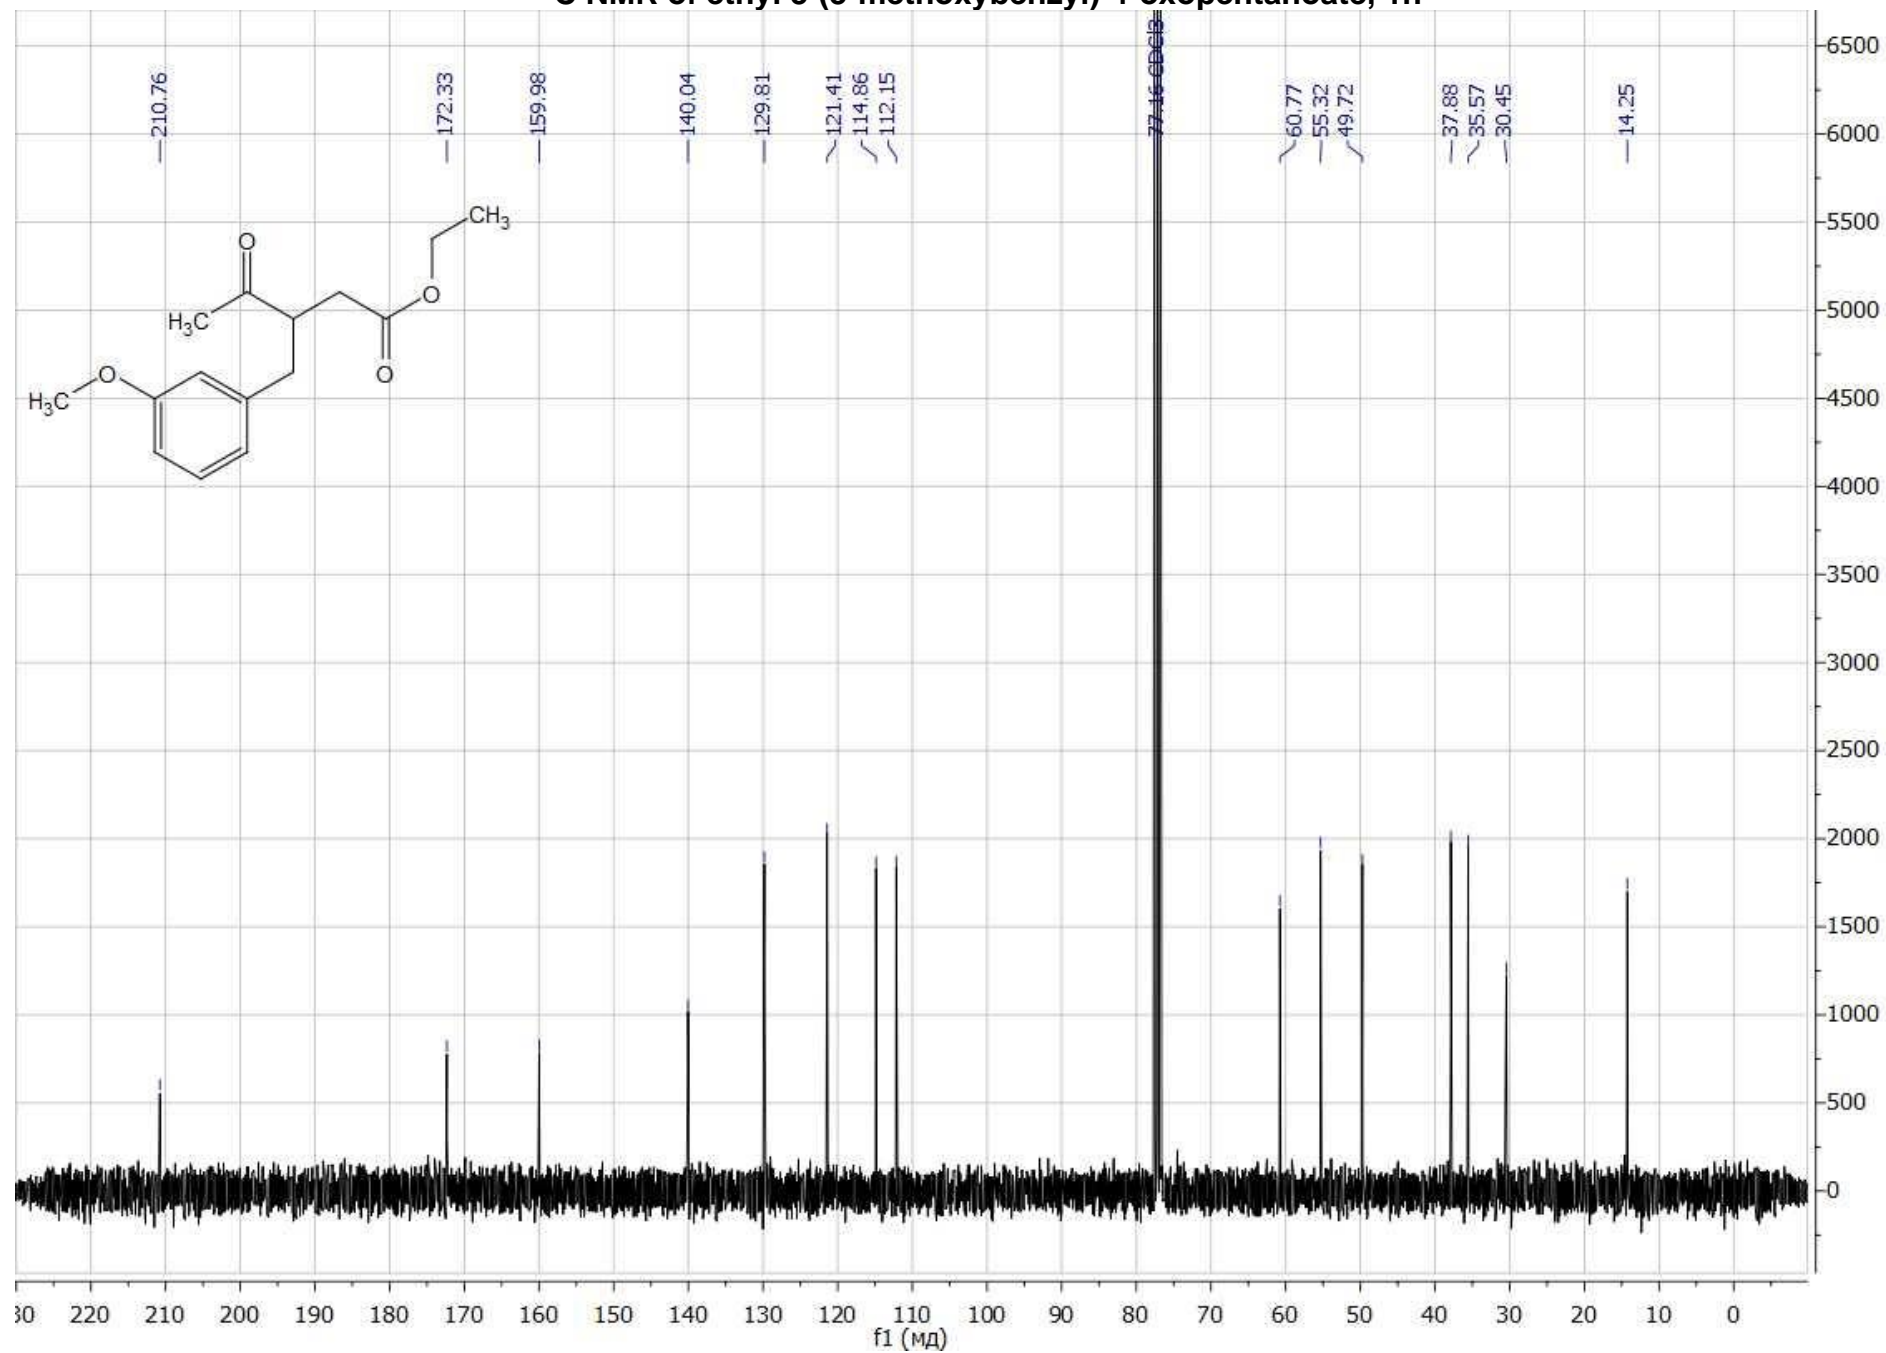

**<sup>1</sup>H NMR of ethyl 3-(2-chlorobenzyl)-4-oxopentanoate, 1i**

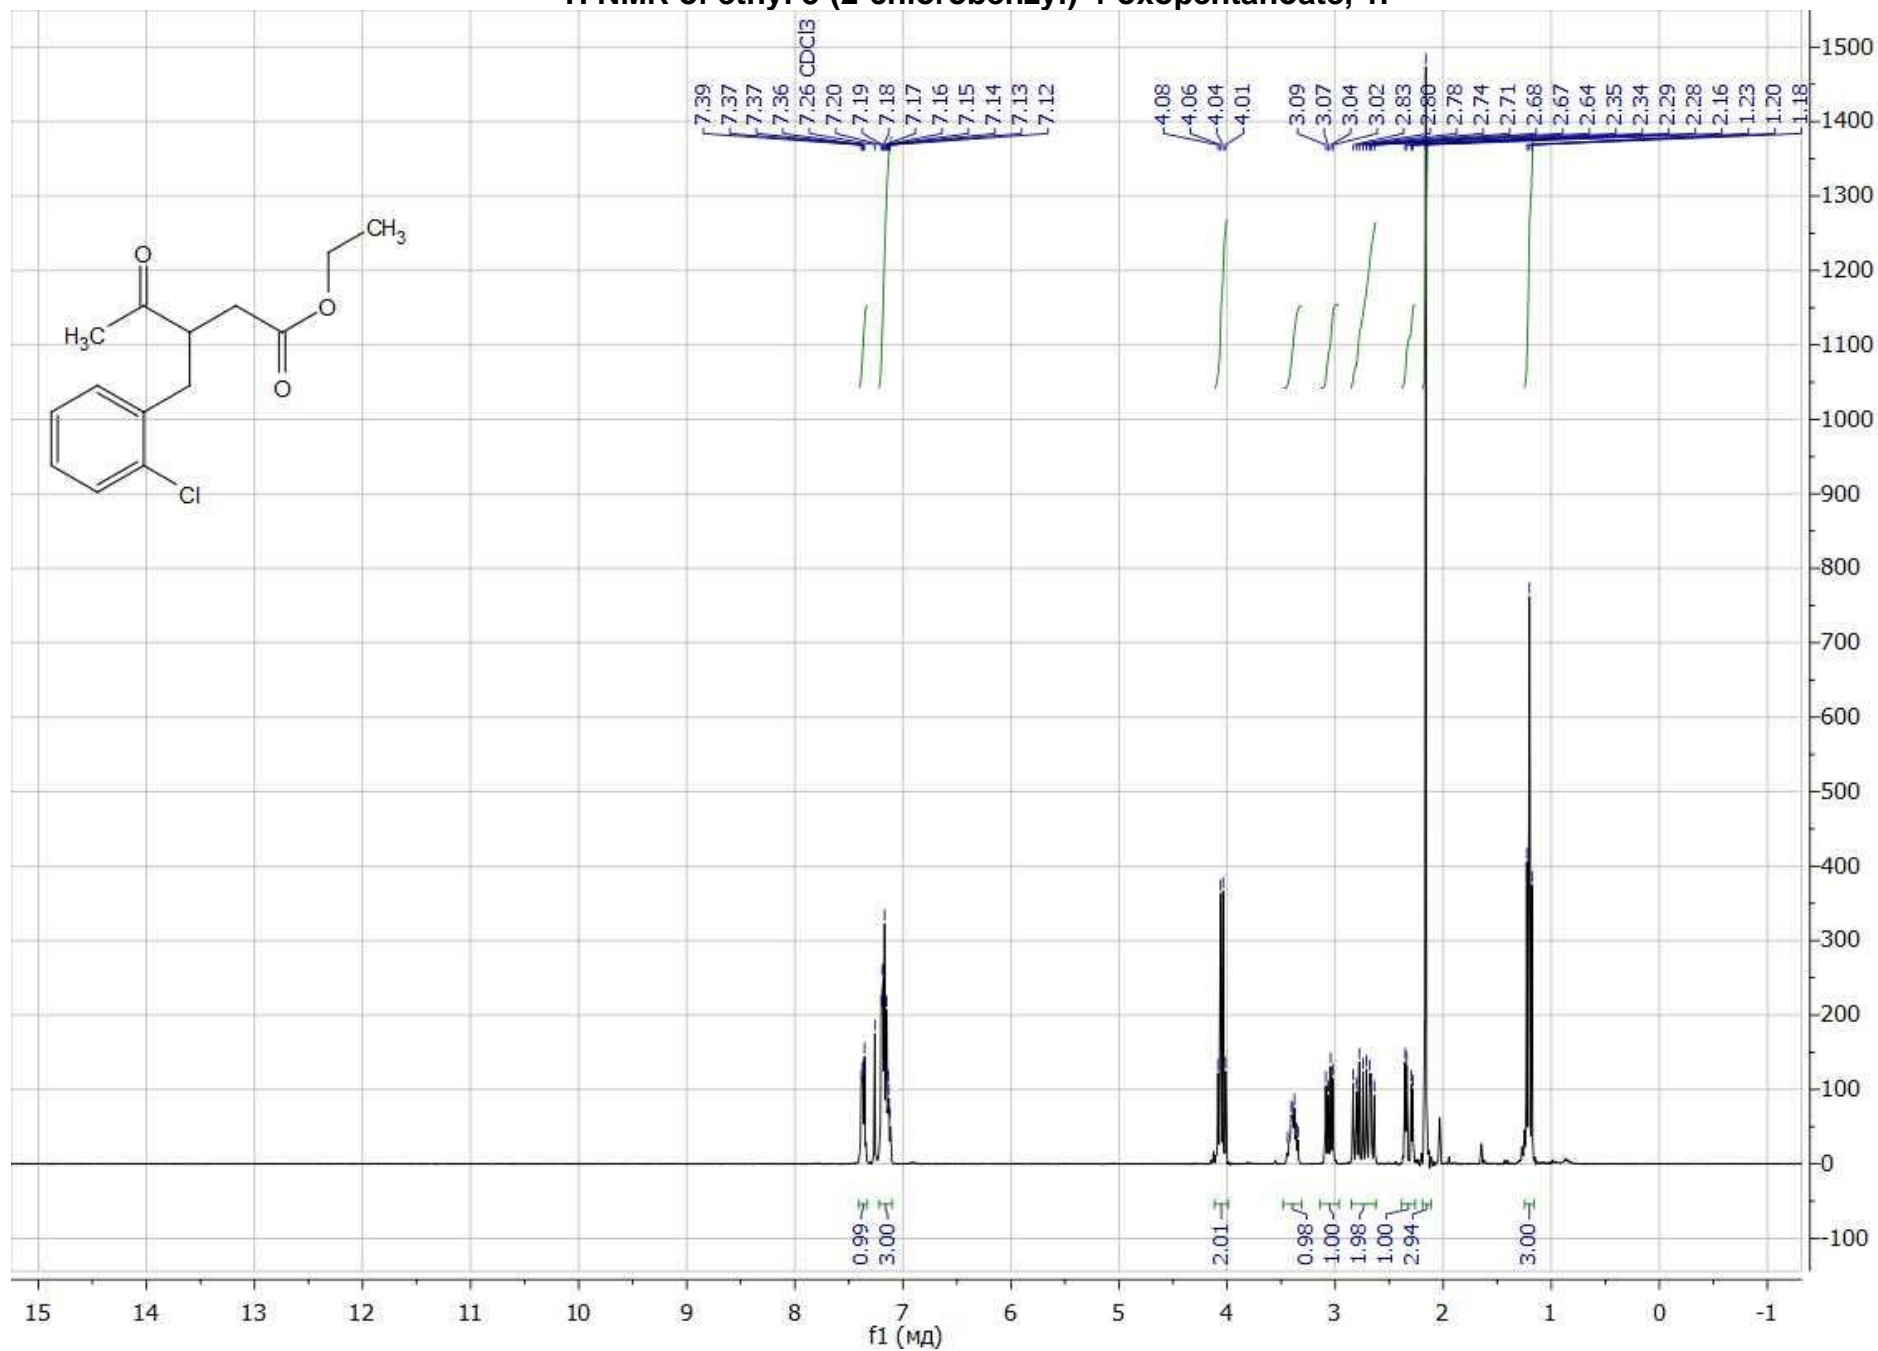

<sup>13</sup>C NMR of ethyl 3-(2-chlorobenzyl)-4-oxopentanoate, 1i

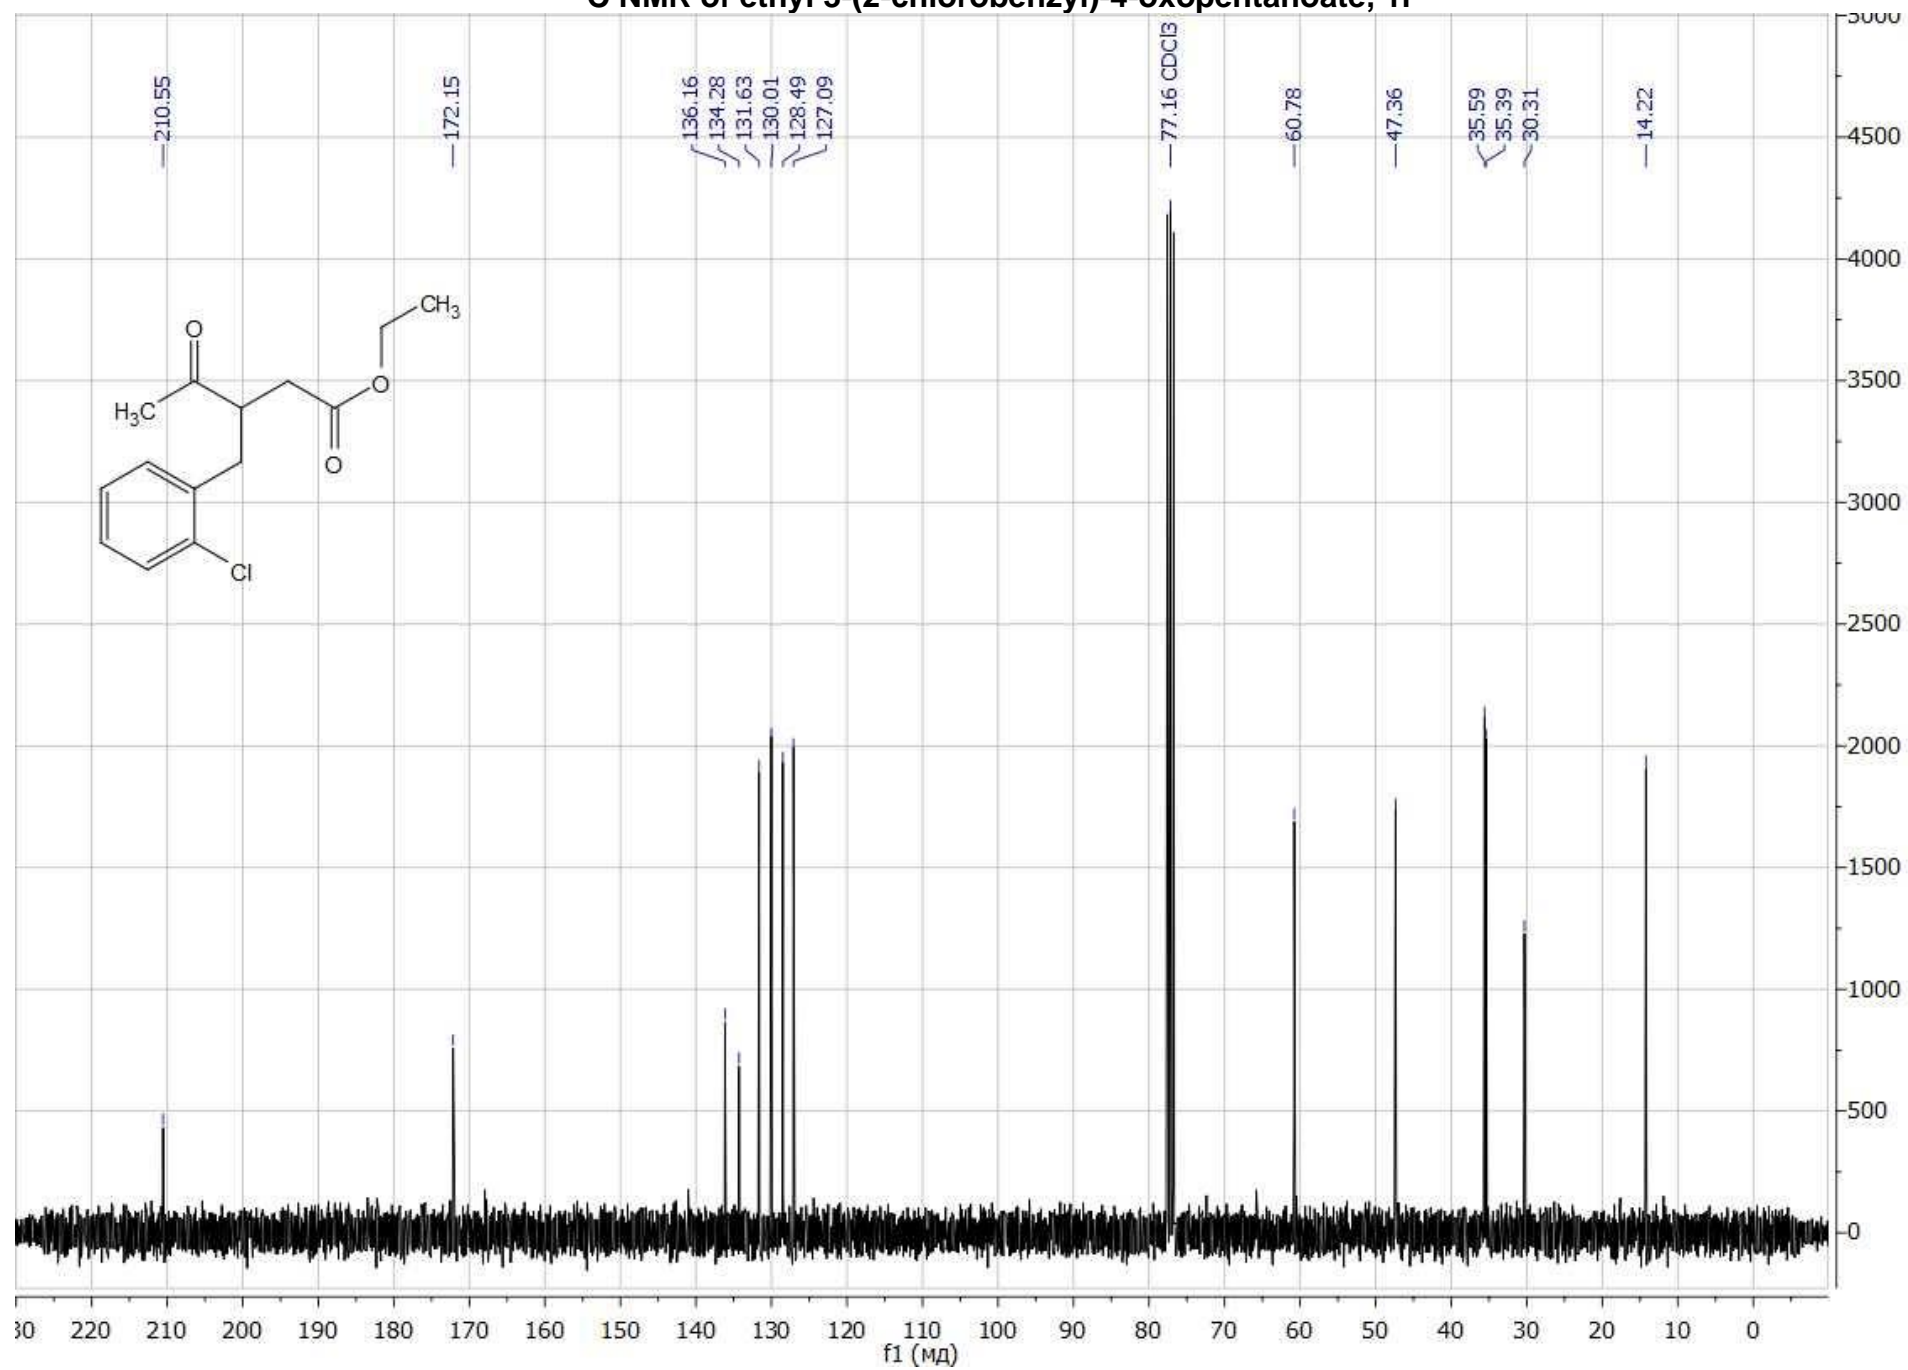

# <sup>1</sup>H NMR of ethyl 3-acetylheptanoate, 1j

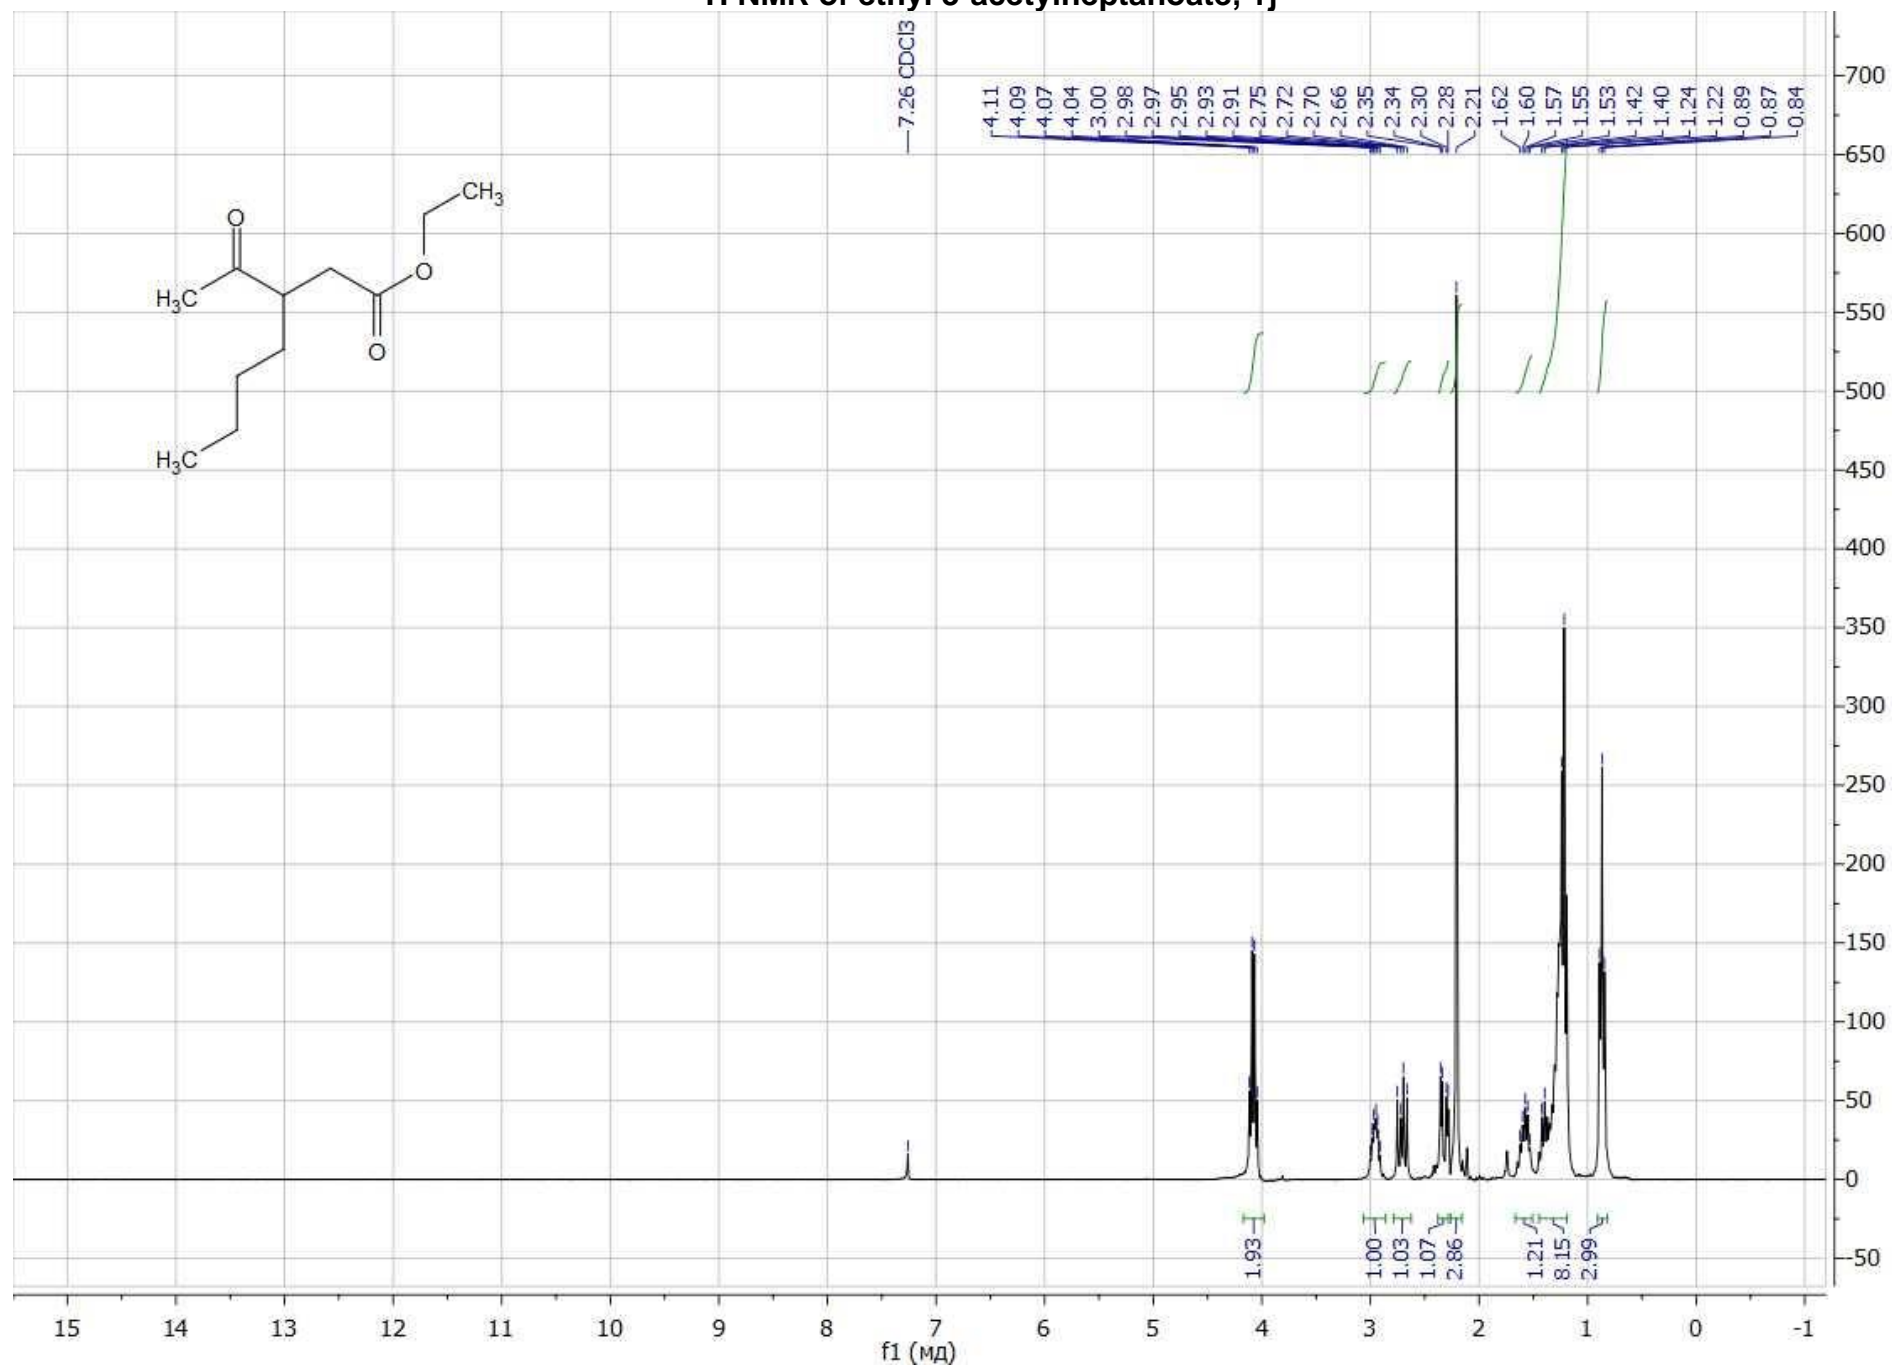

<sup>13</sup>C NMR of ethyl 3-acetylheptanoate, 1j

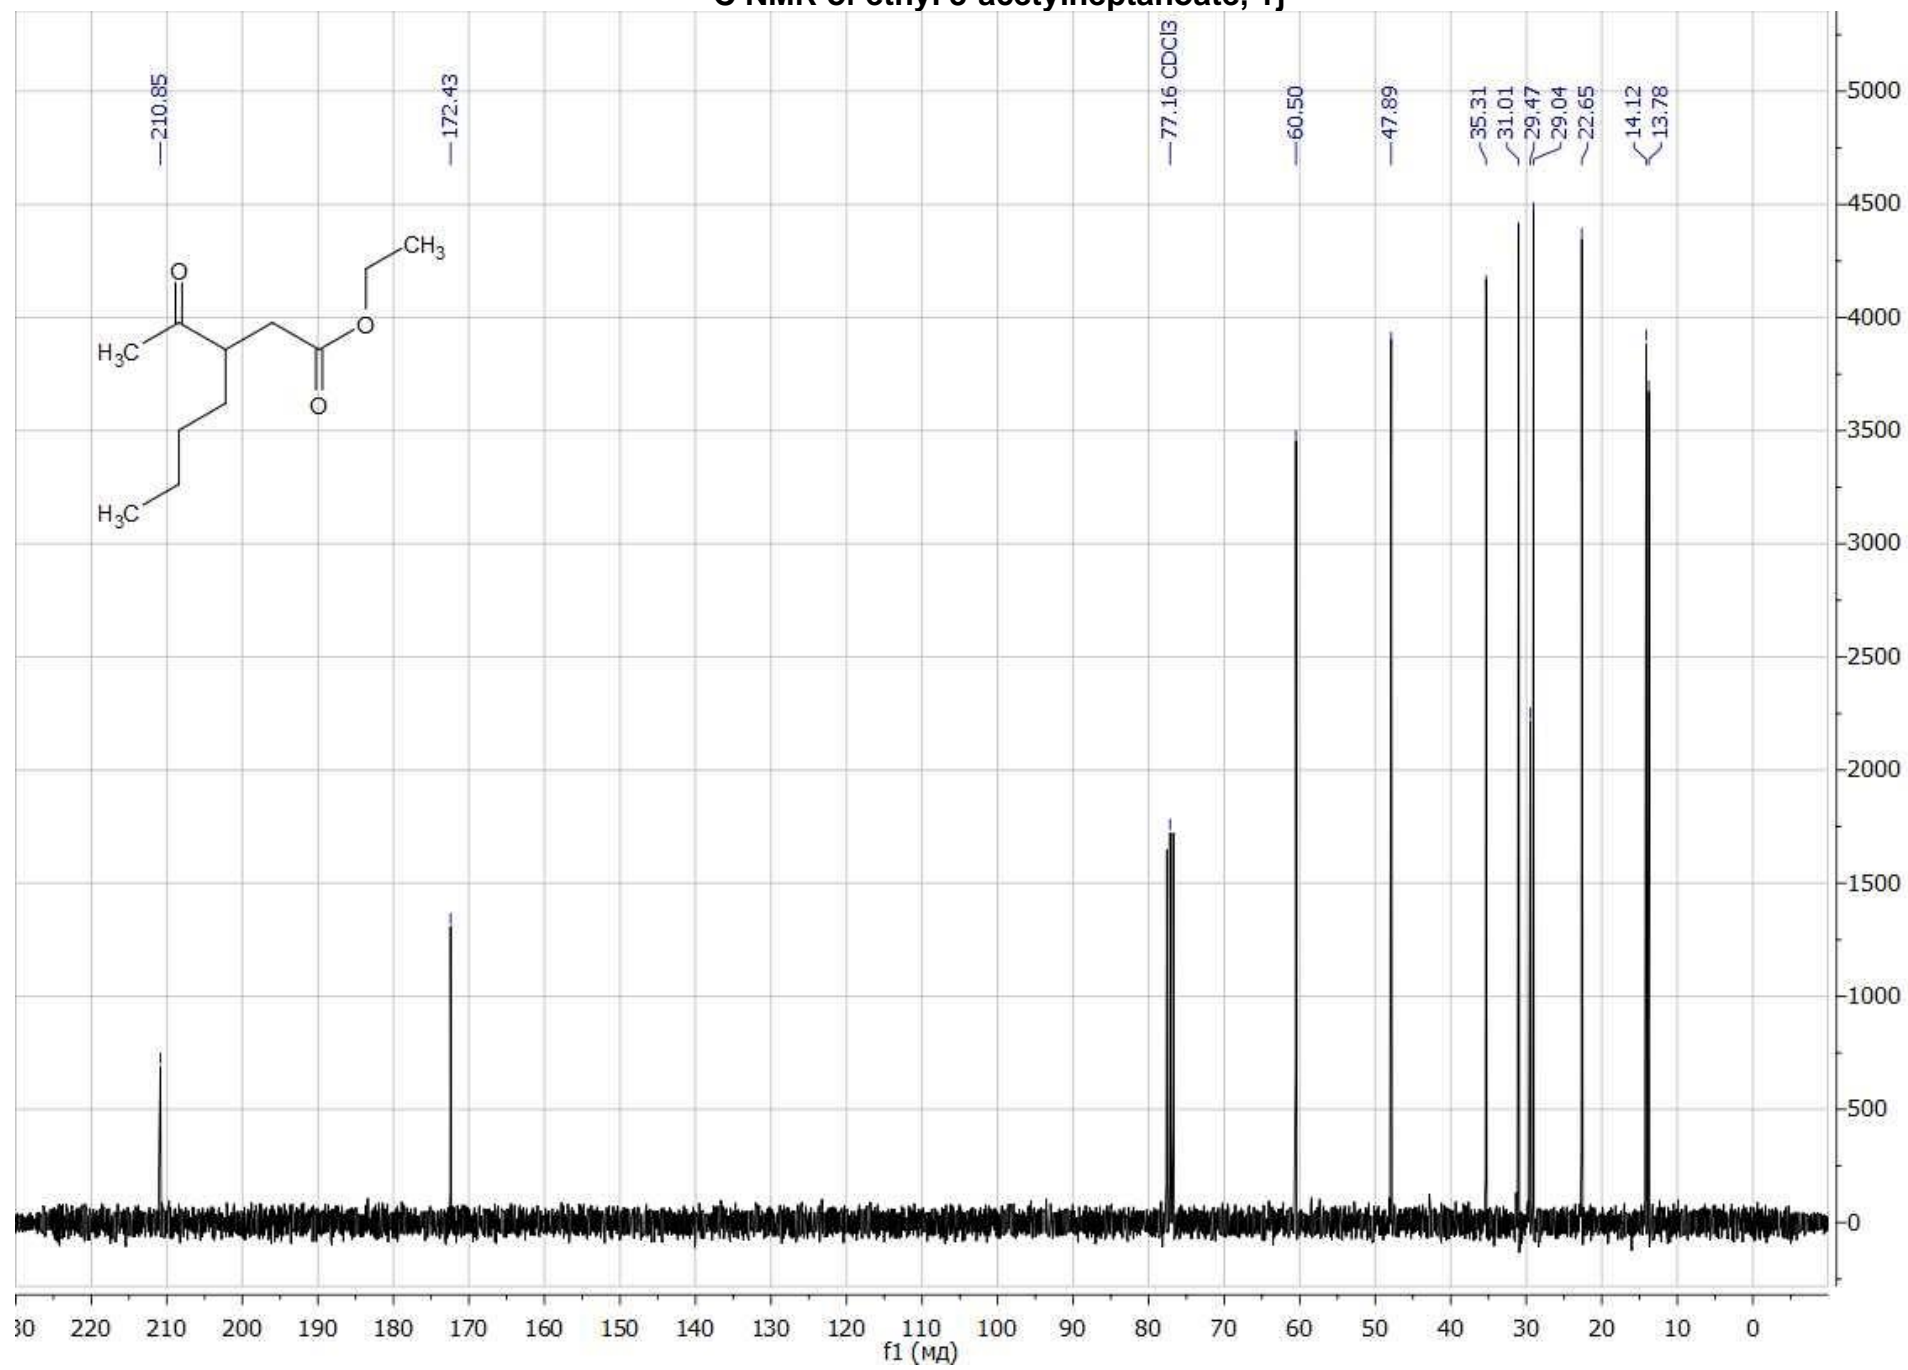

<sup>1</sup>H NMR of ethyl 3-acetylnonanoate, 1k

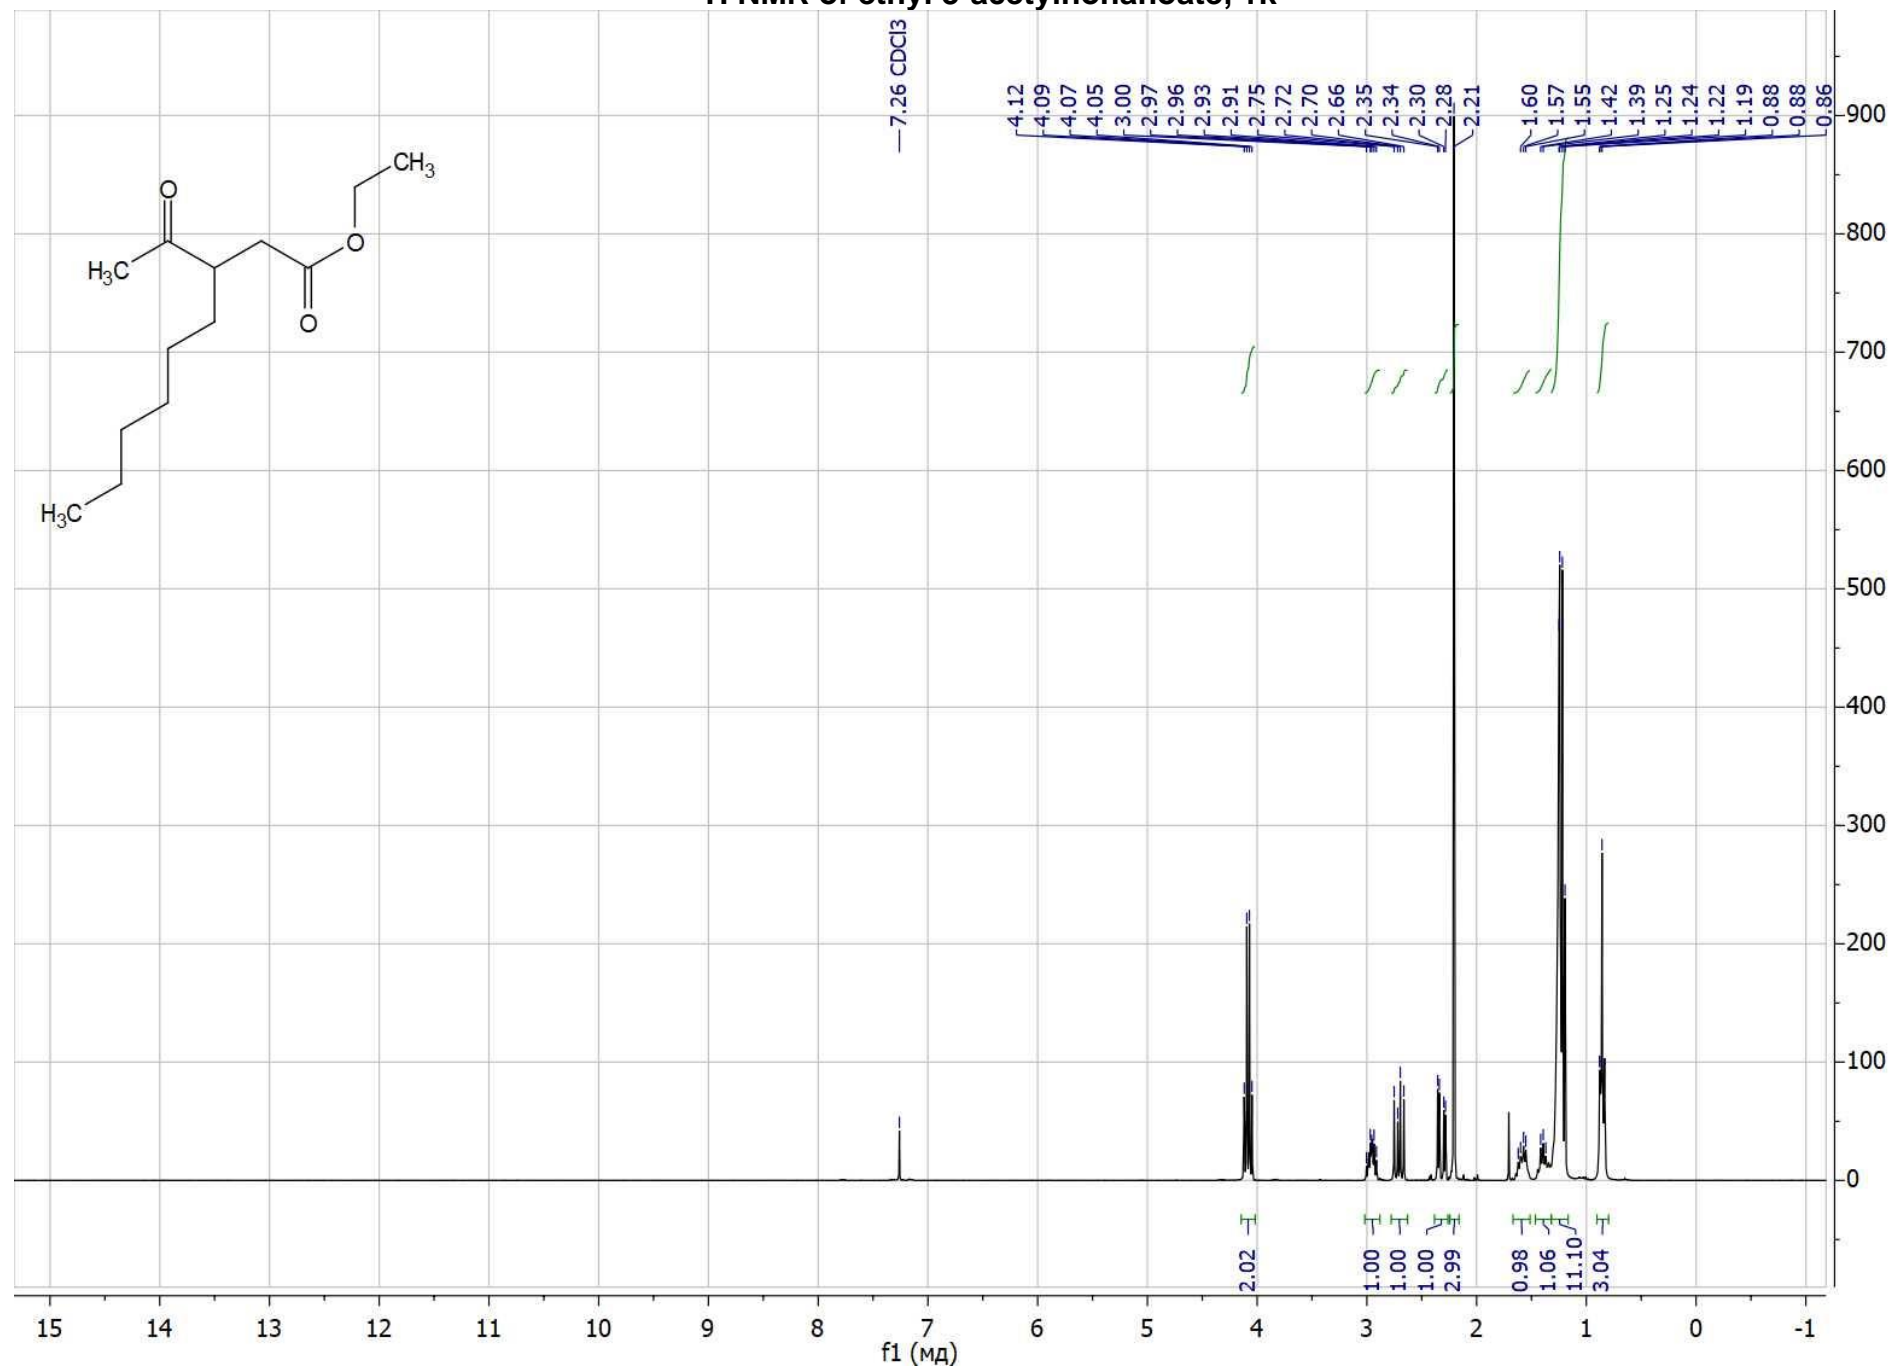

<sup>13</sup>C NMR of ethyl 3-acetylnonanoate, 1k

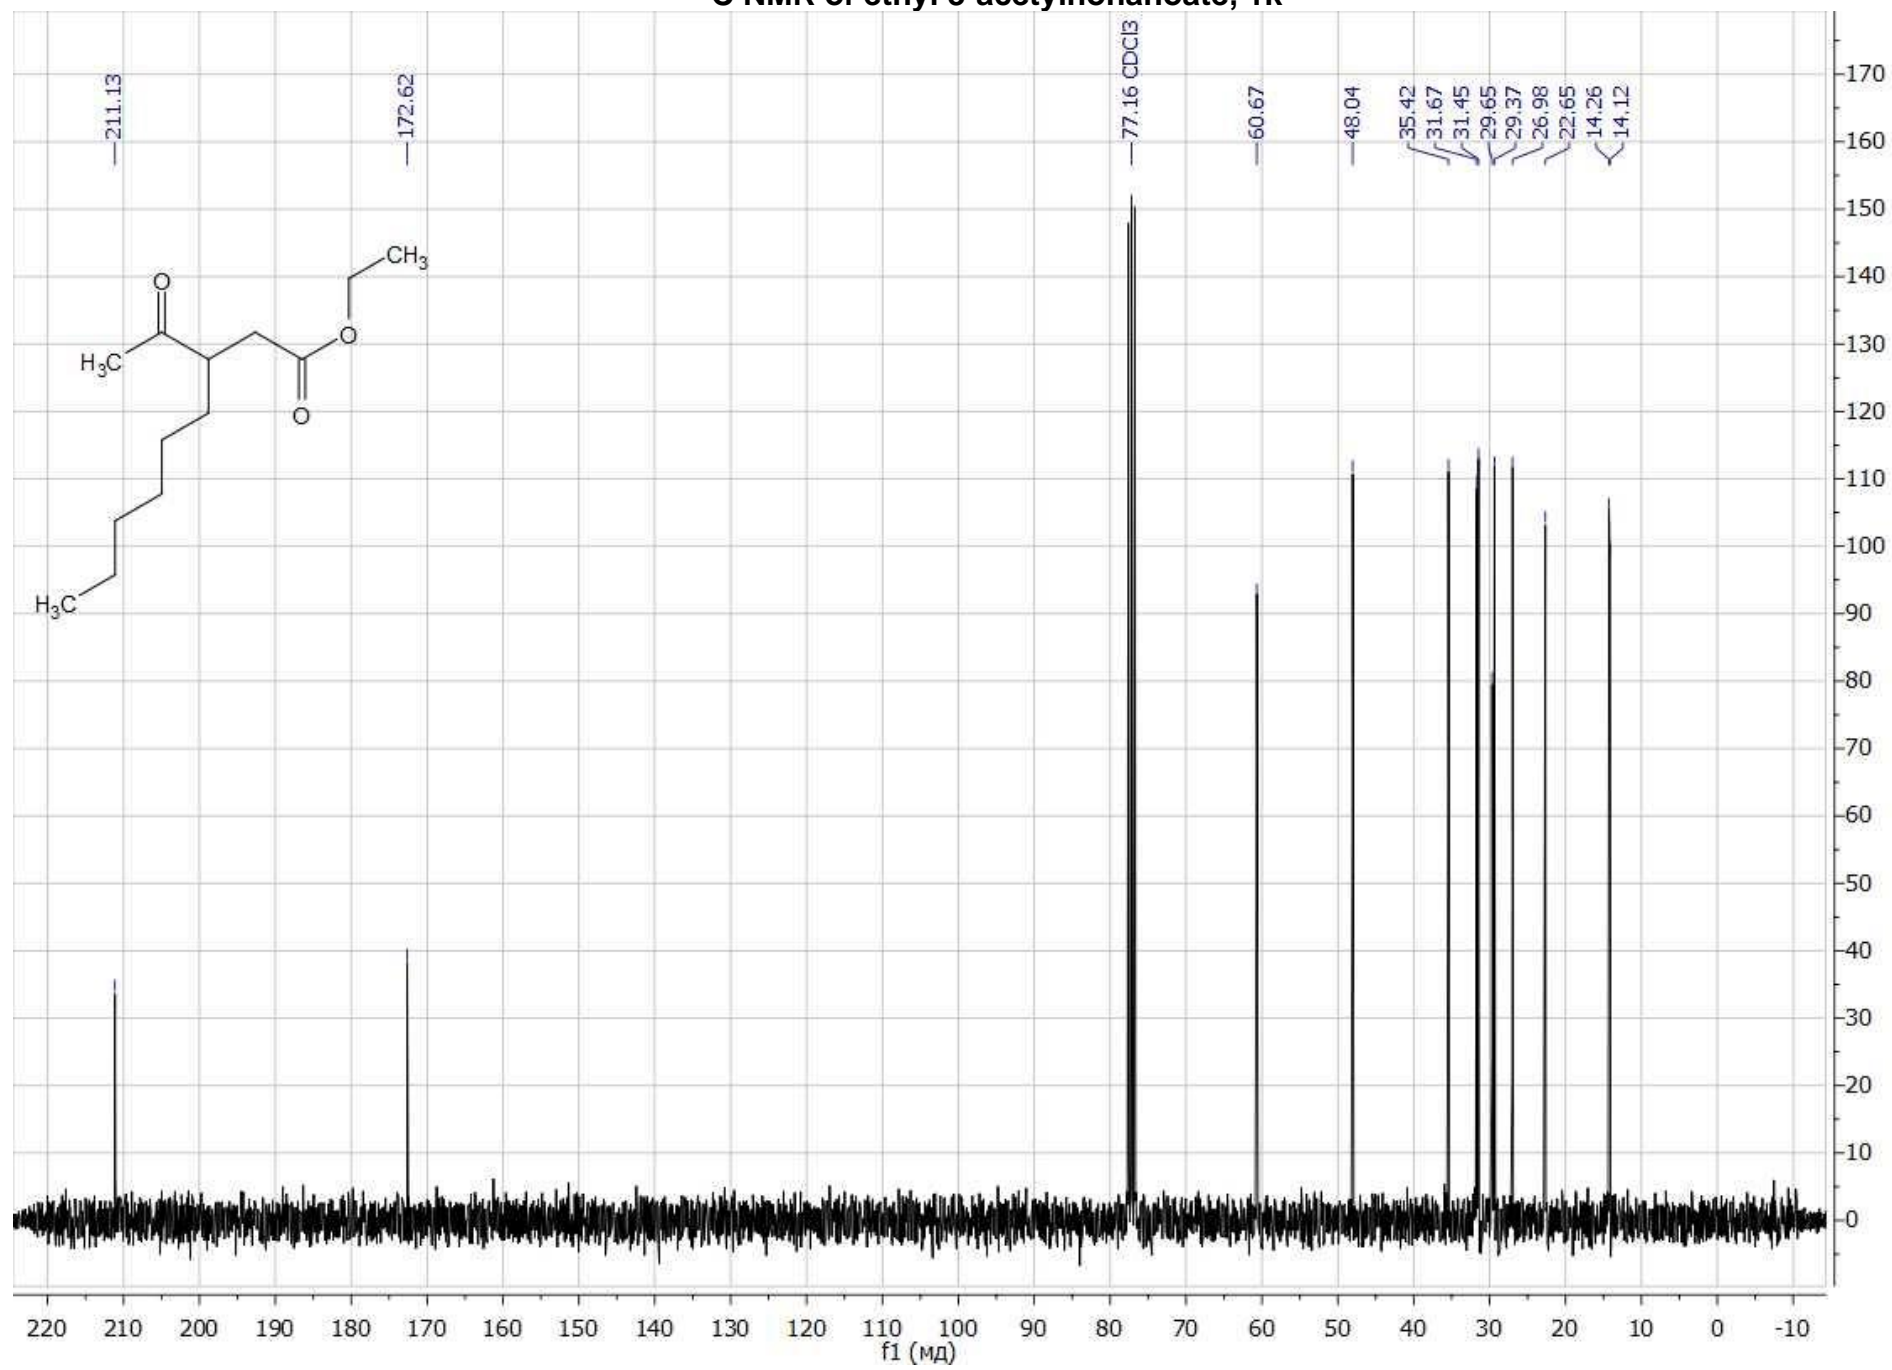

# <sup>1</sup>H NMR of ethyl 3-acetylundecanoate, 1I

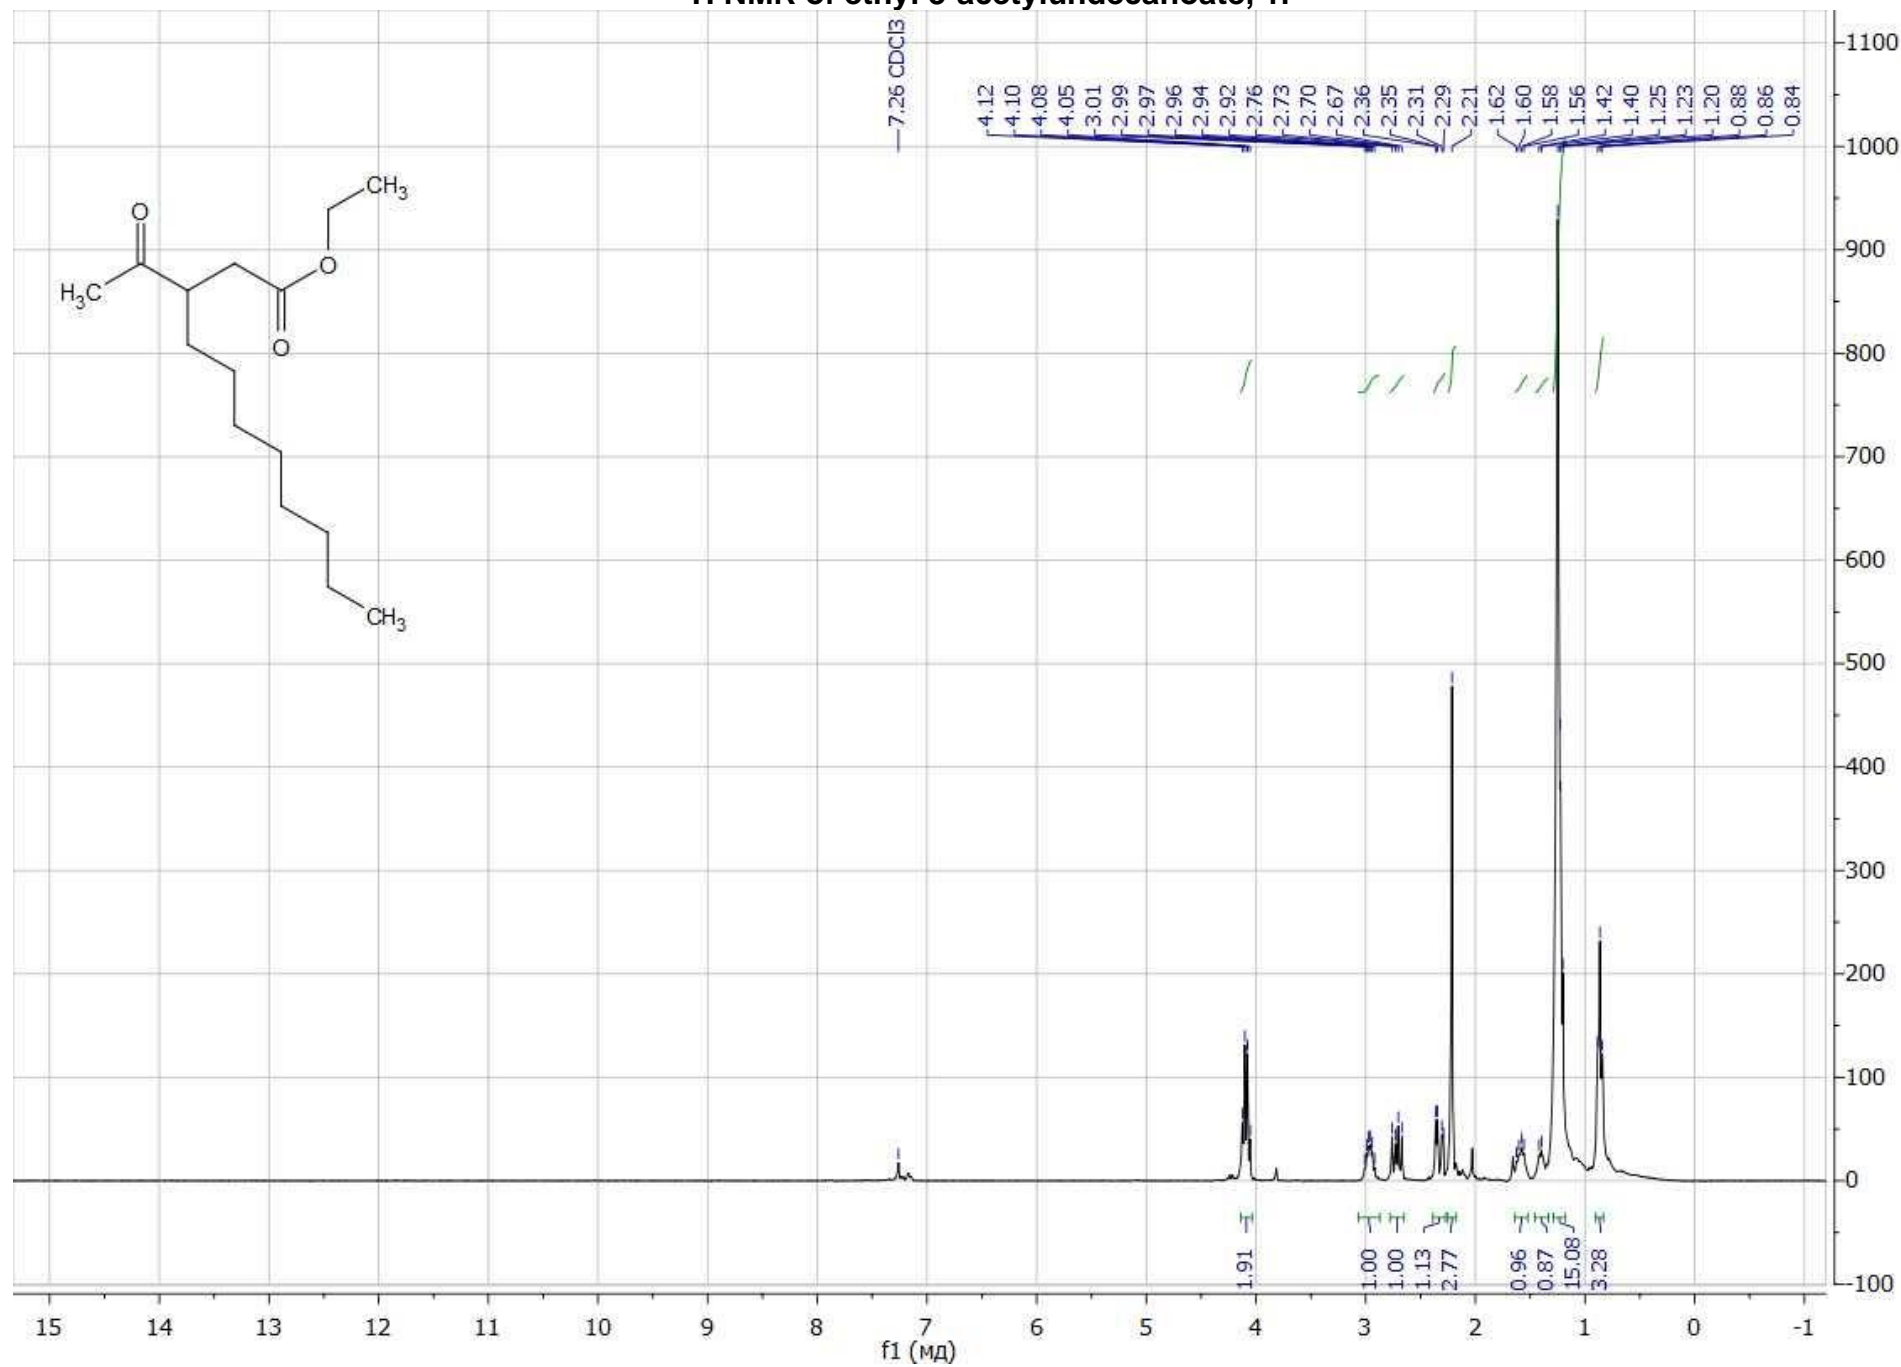



<sup>13</sup>C NMR of ethyl 3-acetylundecanoate, 11

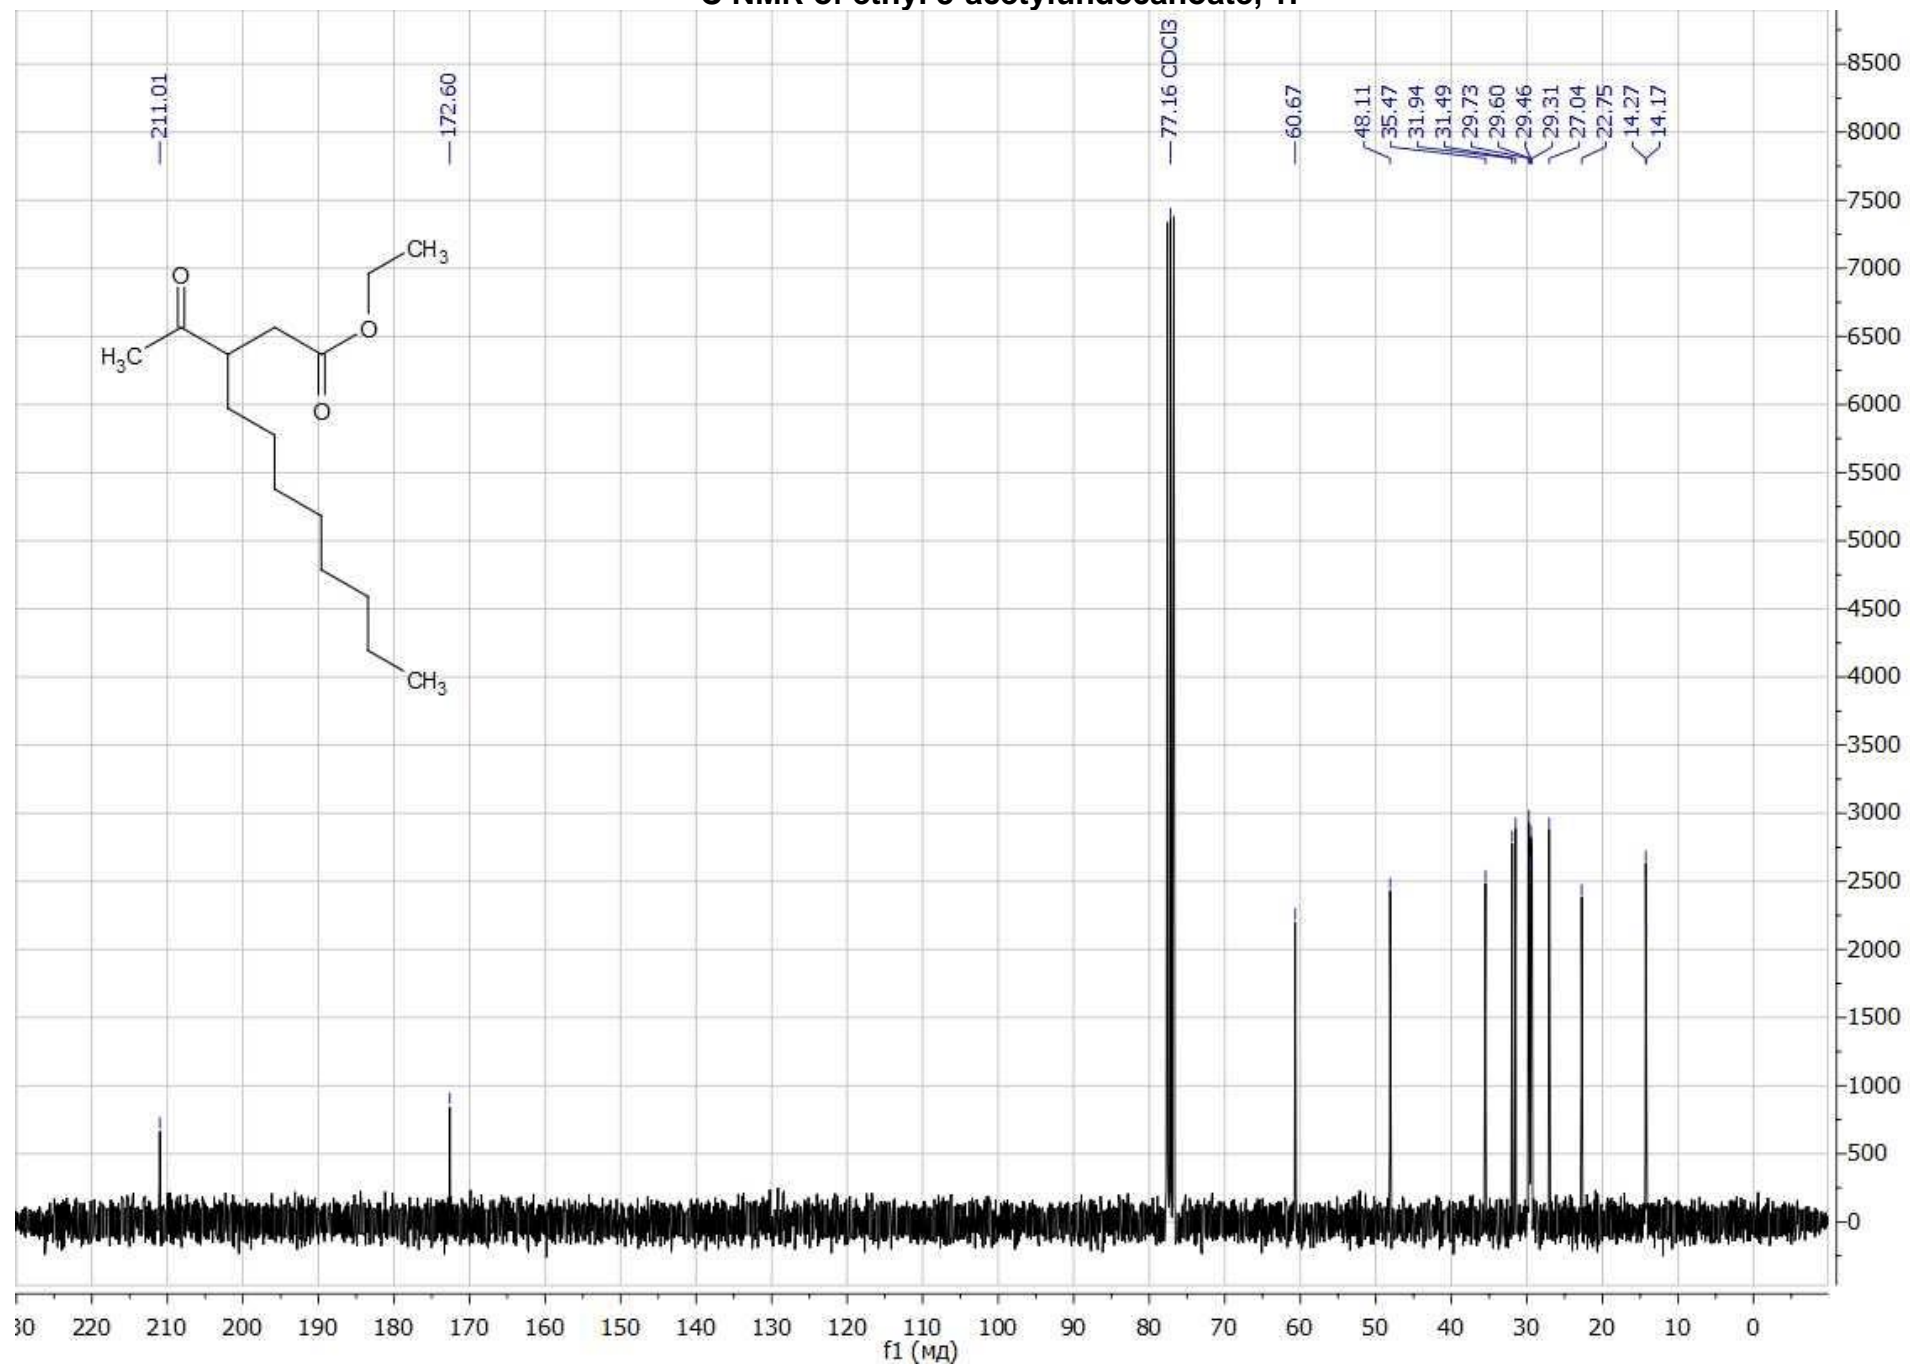

<sup>1</sup>H NMR of ethyl 2-methyl-4-oxopentanoate, 1n

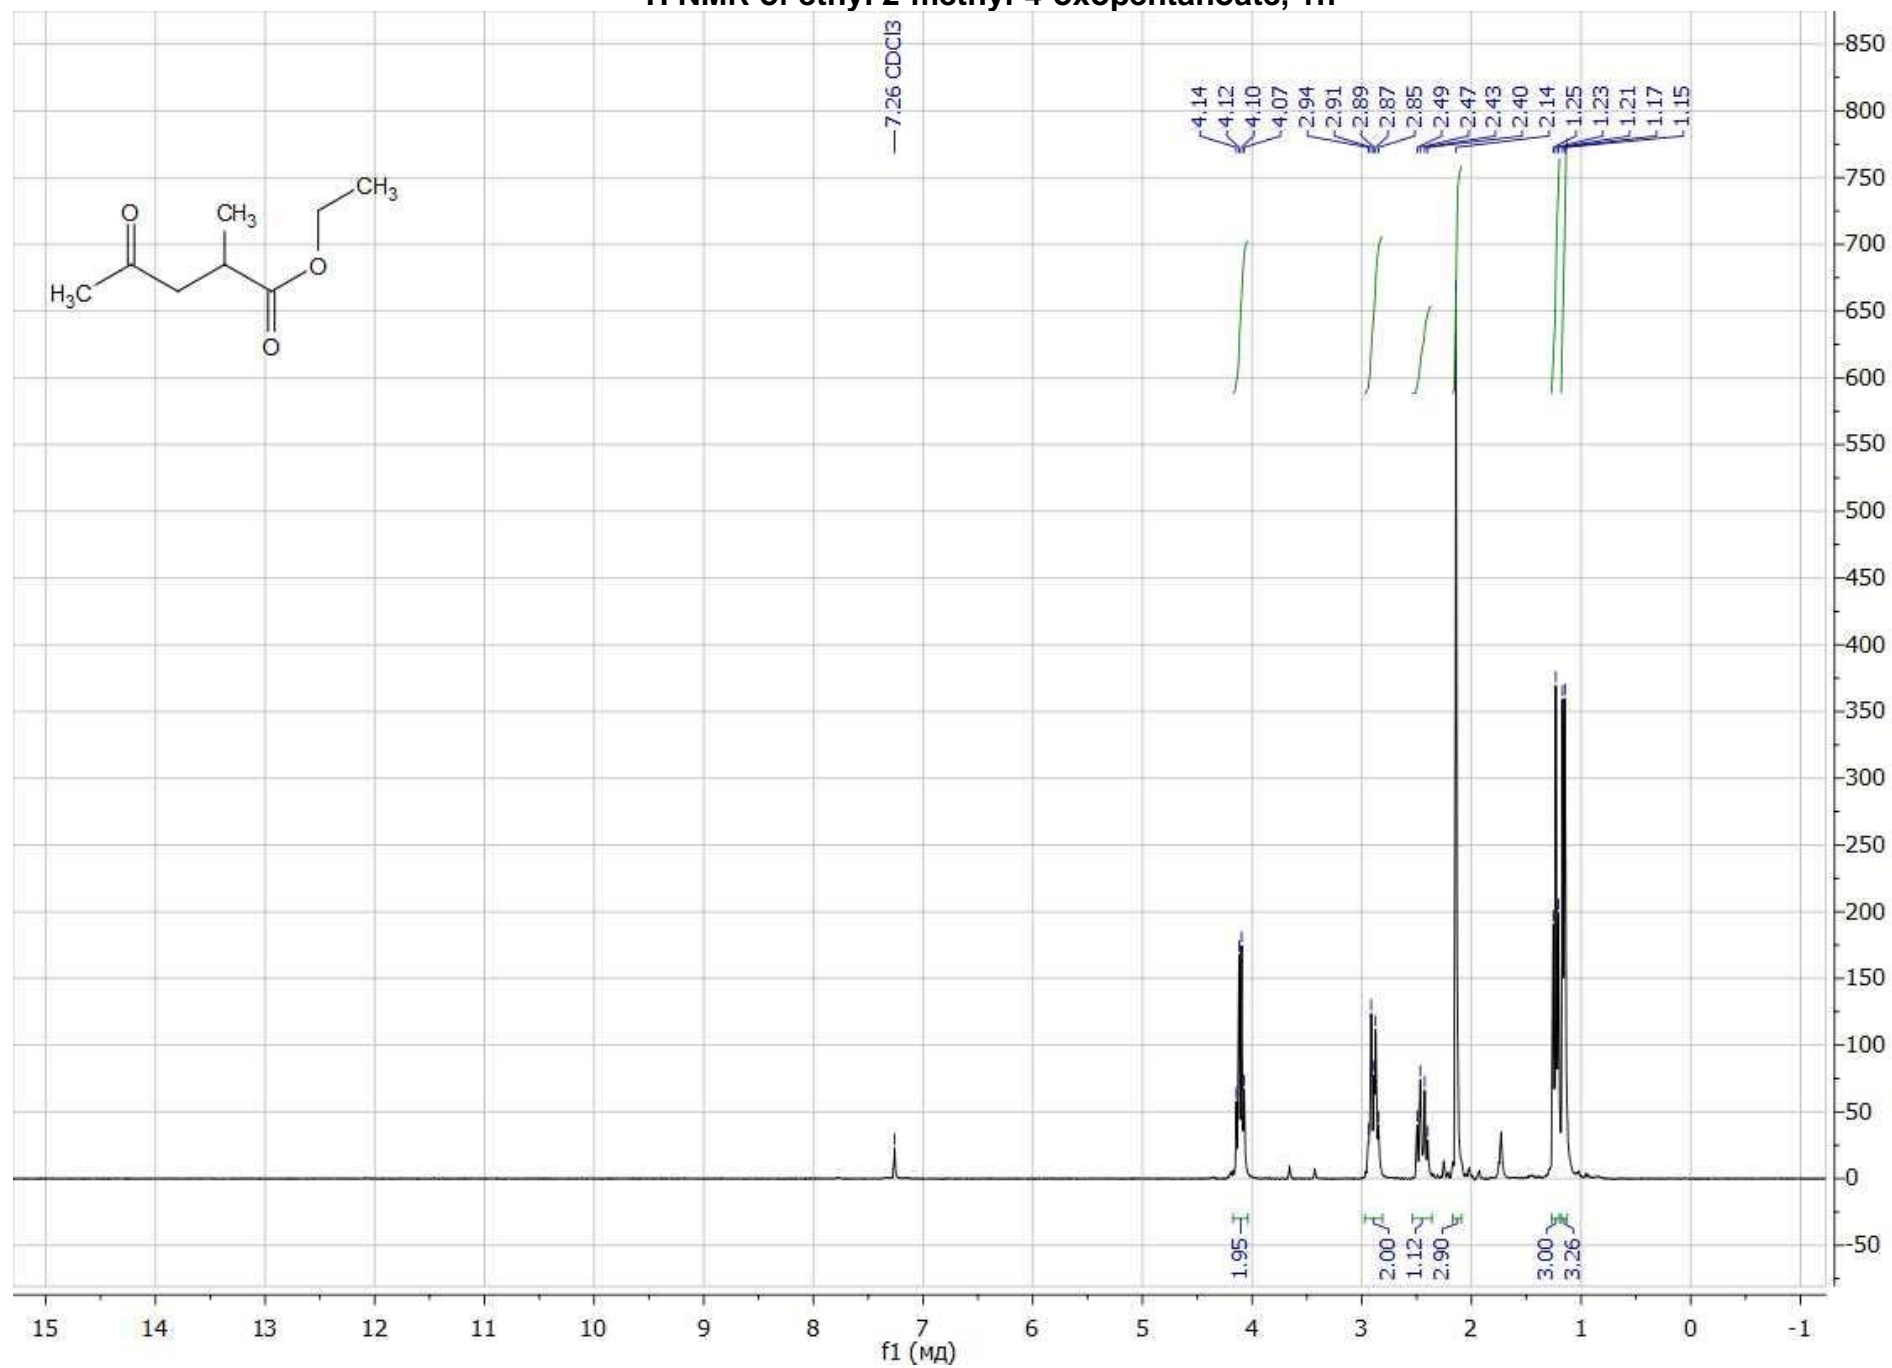

<sup>13</sup>C NMR of ethyl 2-methyl-4-oxopentanoate, 1n

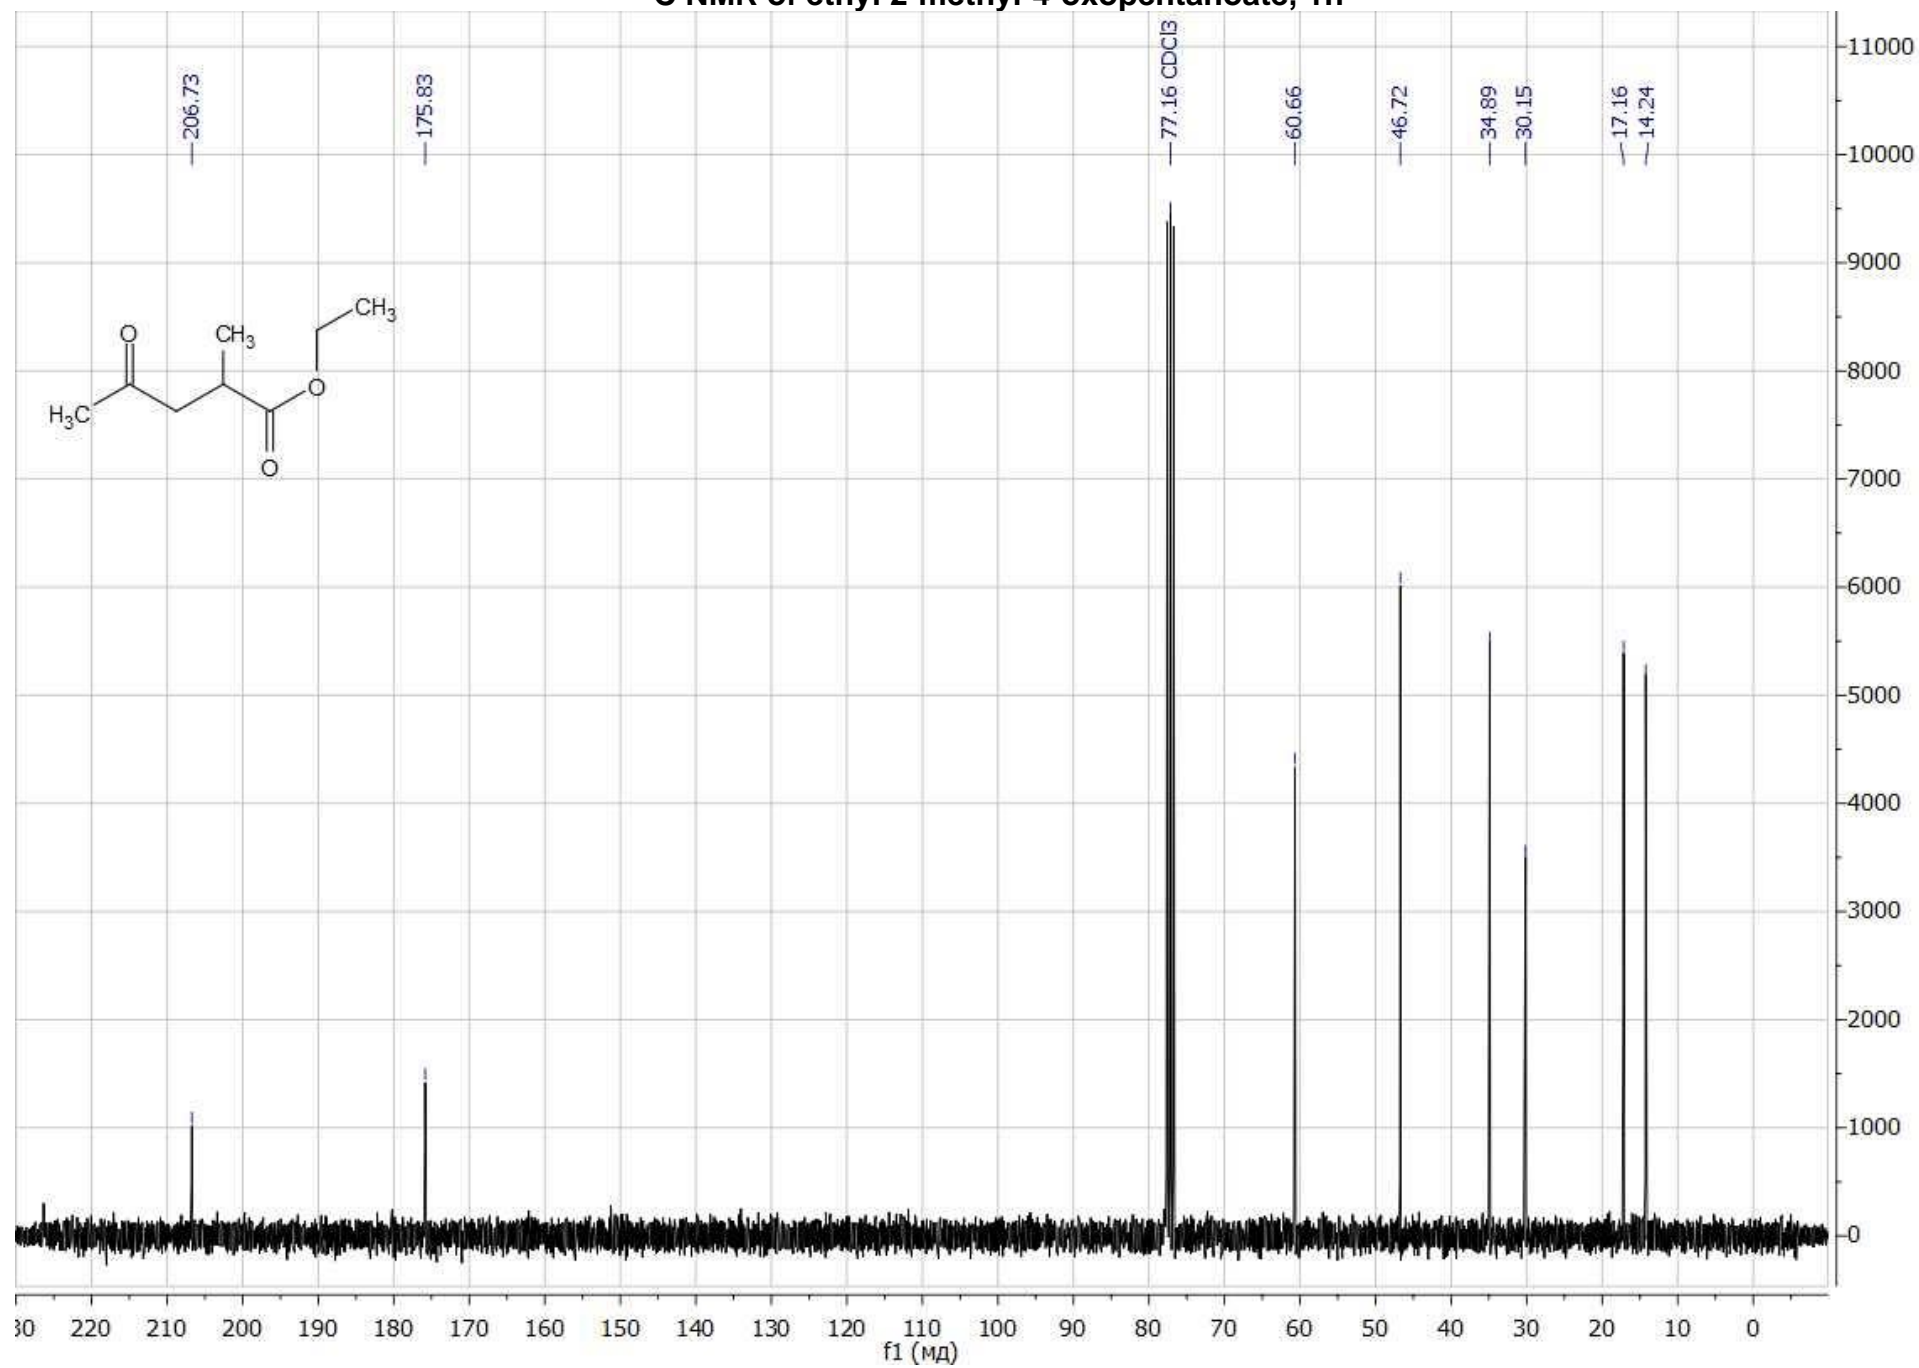

<sup>1</sup>H NMR of ethyl 4-oxooctanoate, 1o

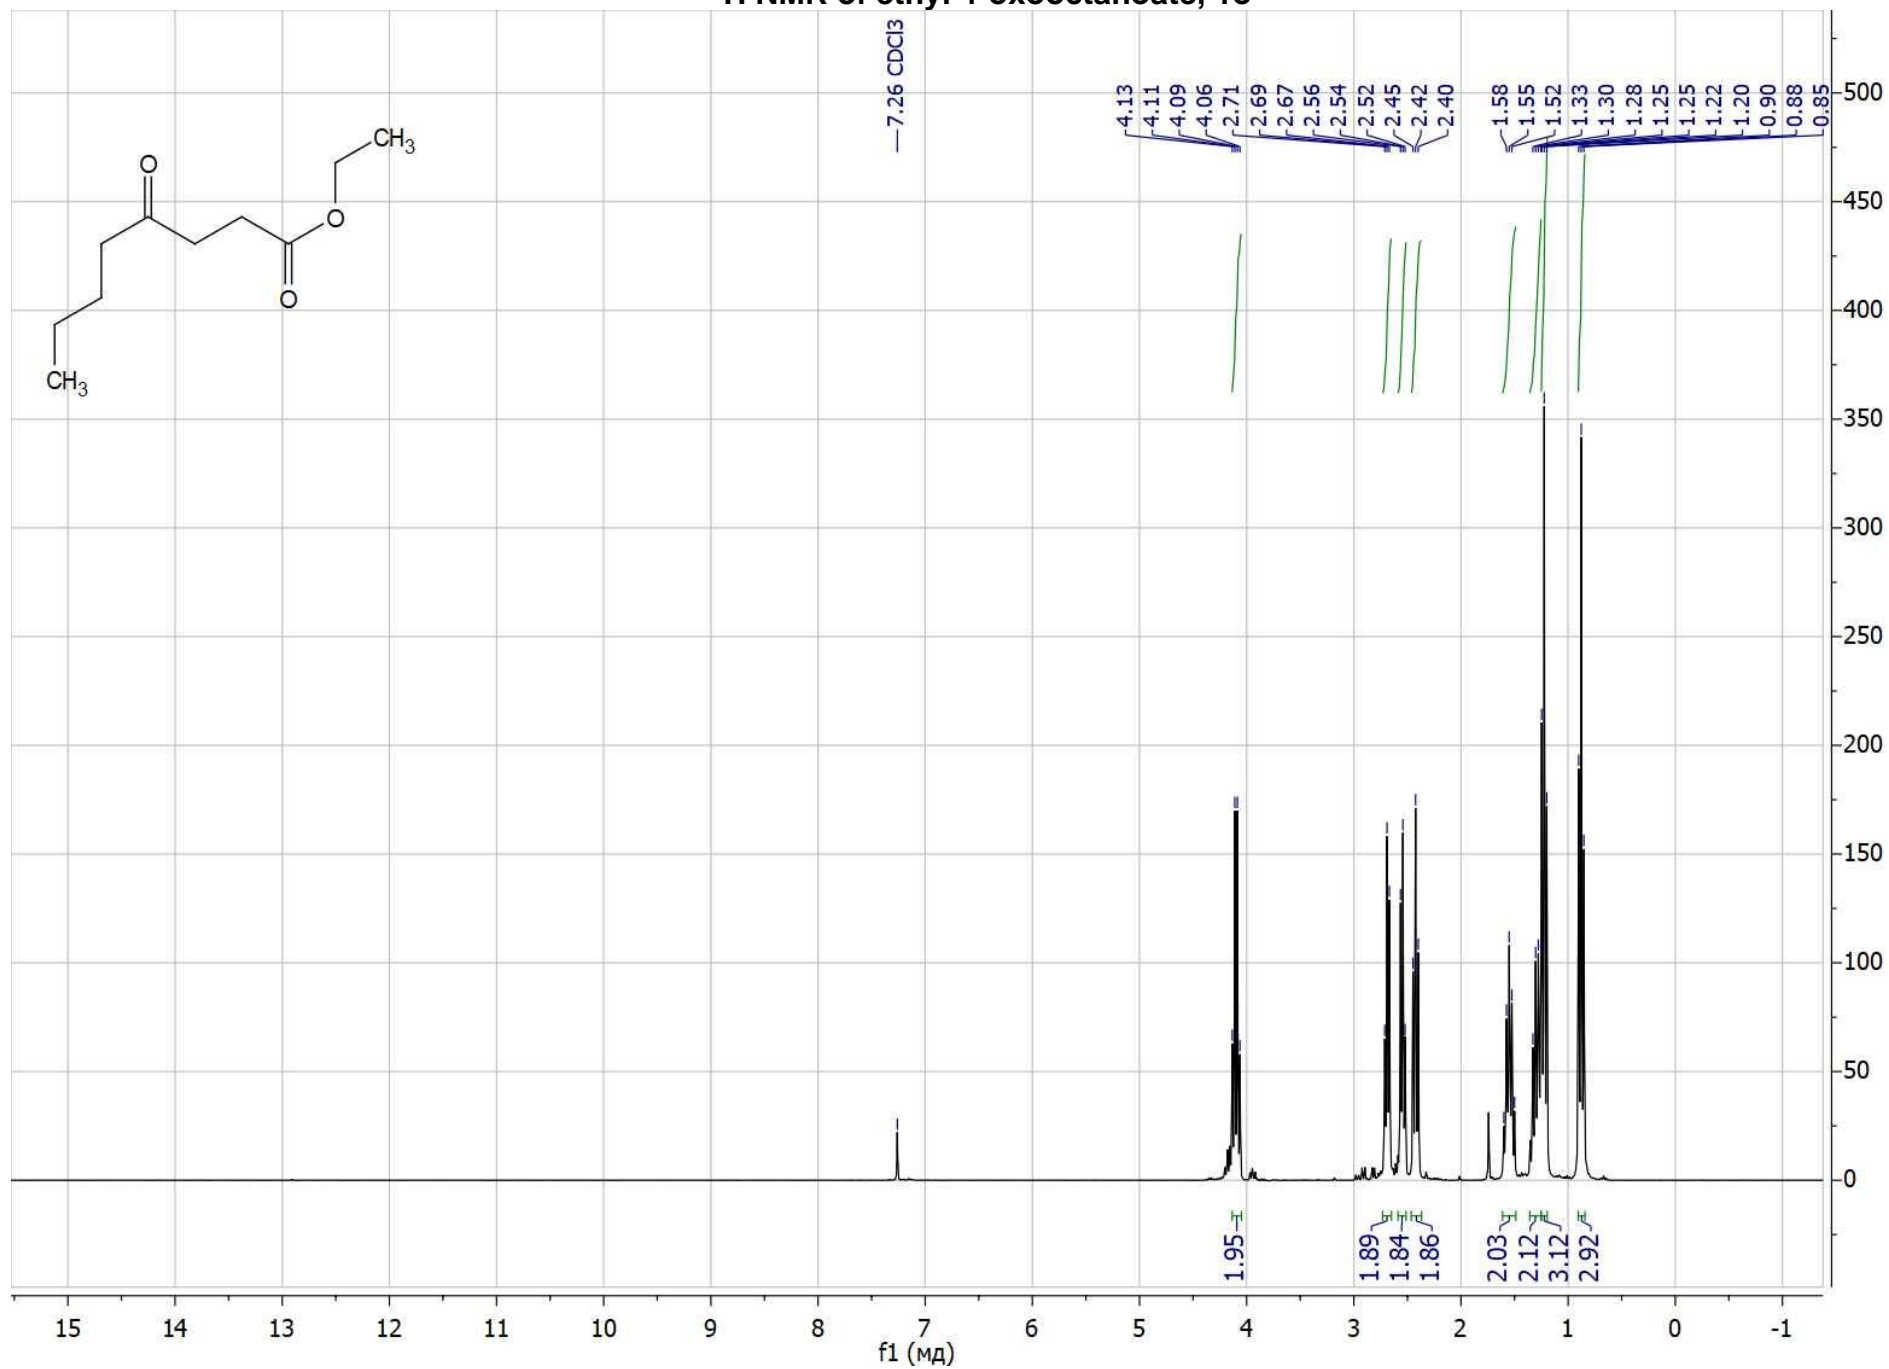

<sup>13</sup>C NMR of ethyl 4-oxooctanoate, 1o

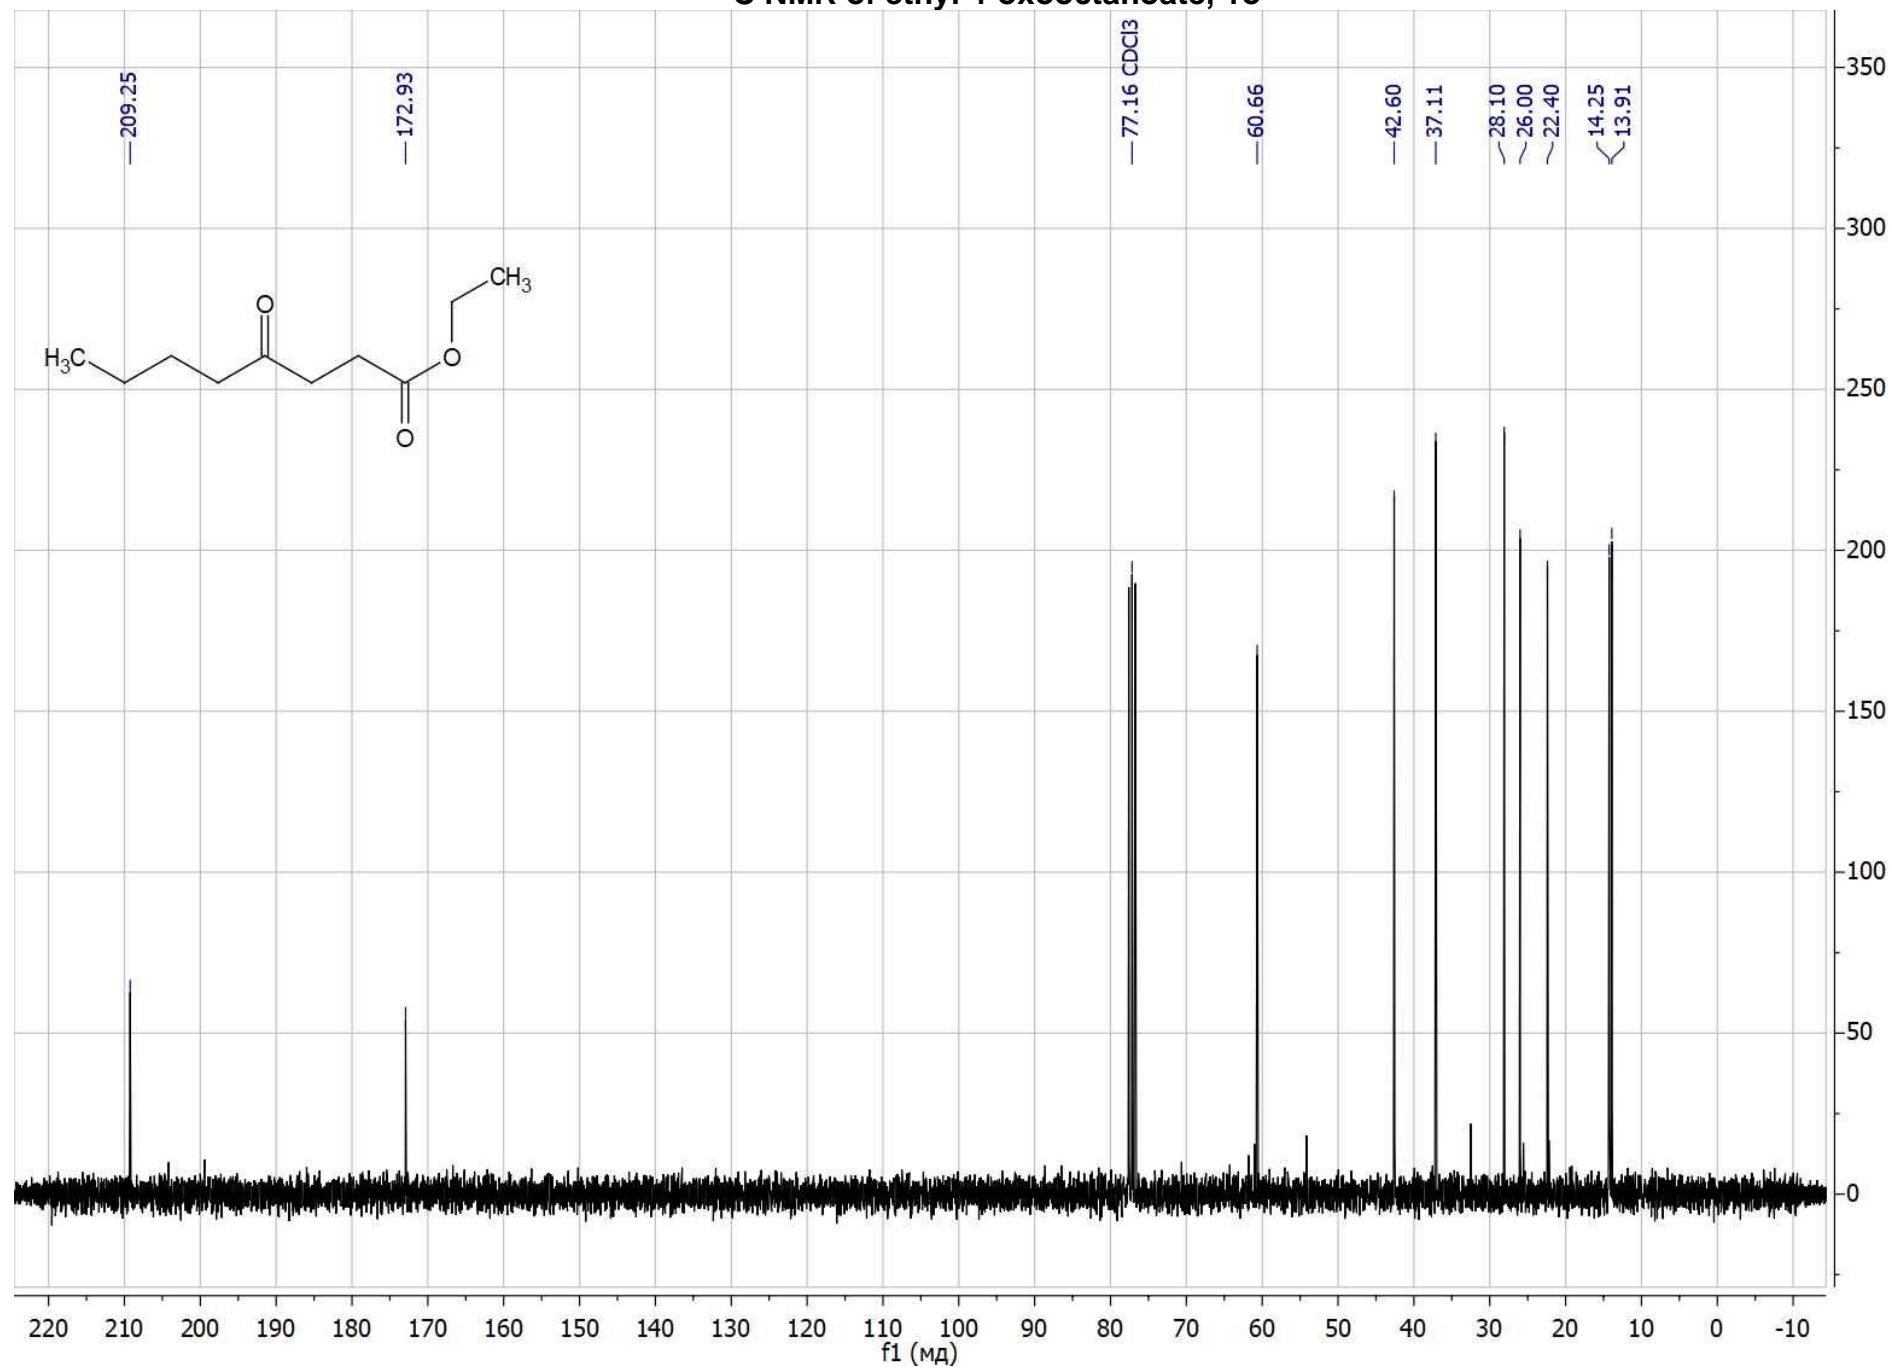

<sup>1</sup>H NMR of methyl 4-oxo-4-phenylbutanoate, 1p

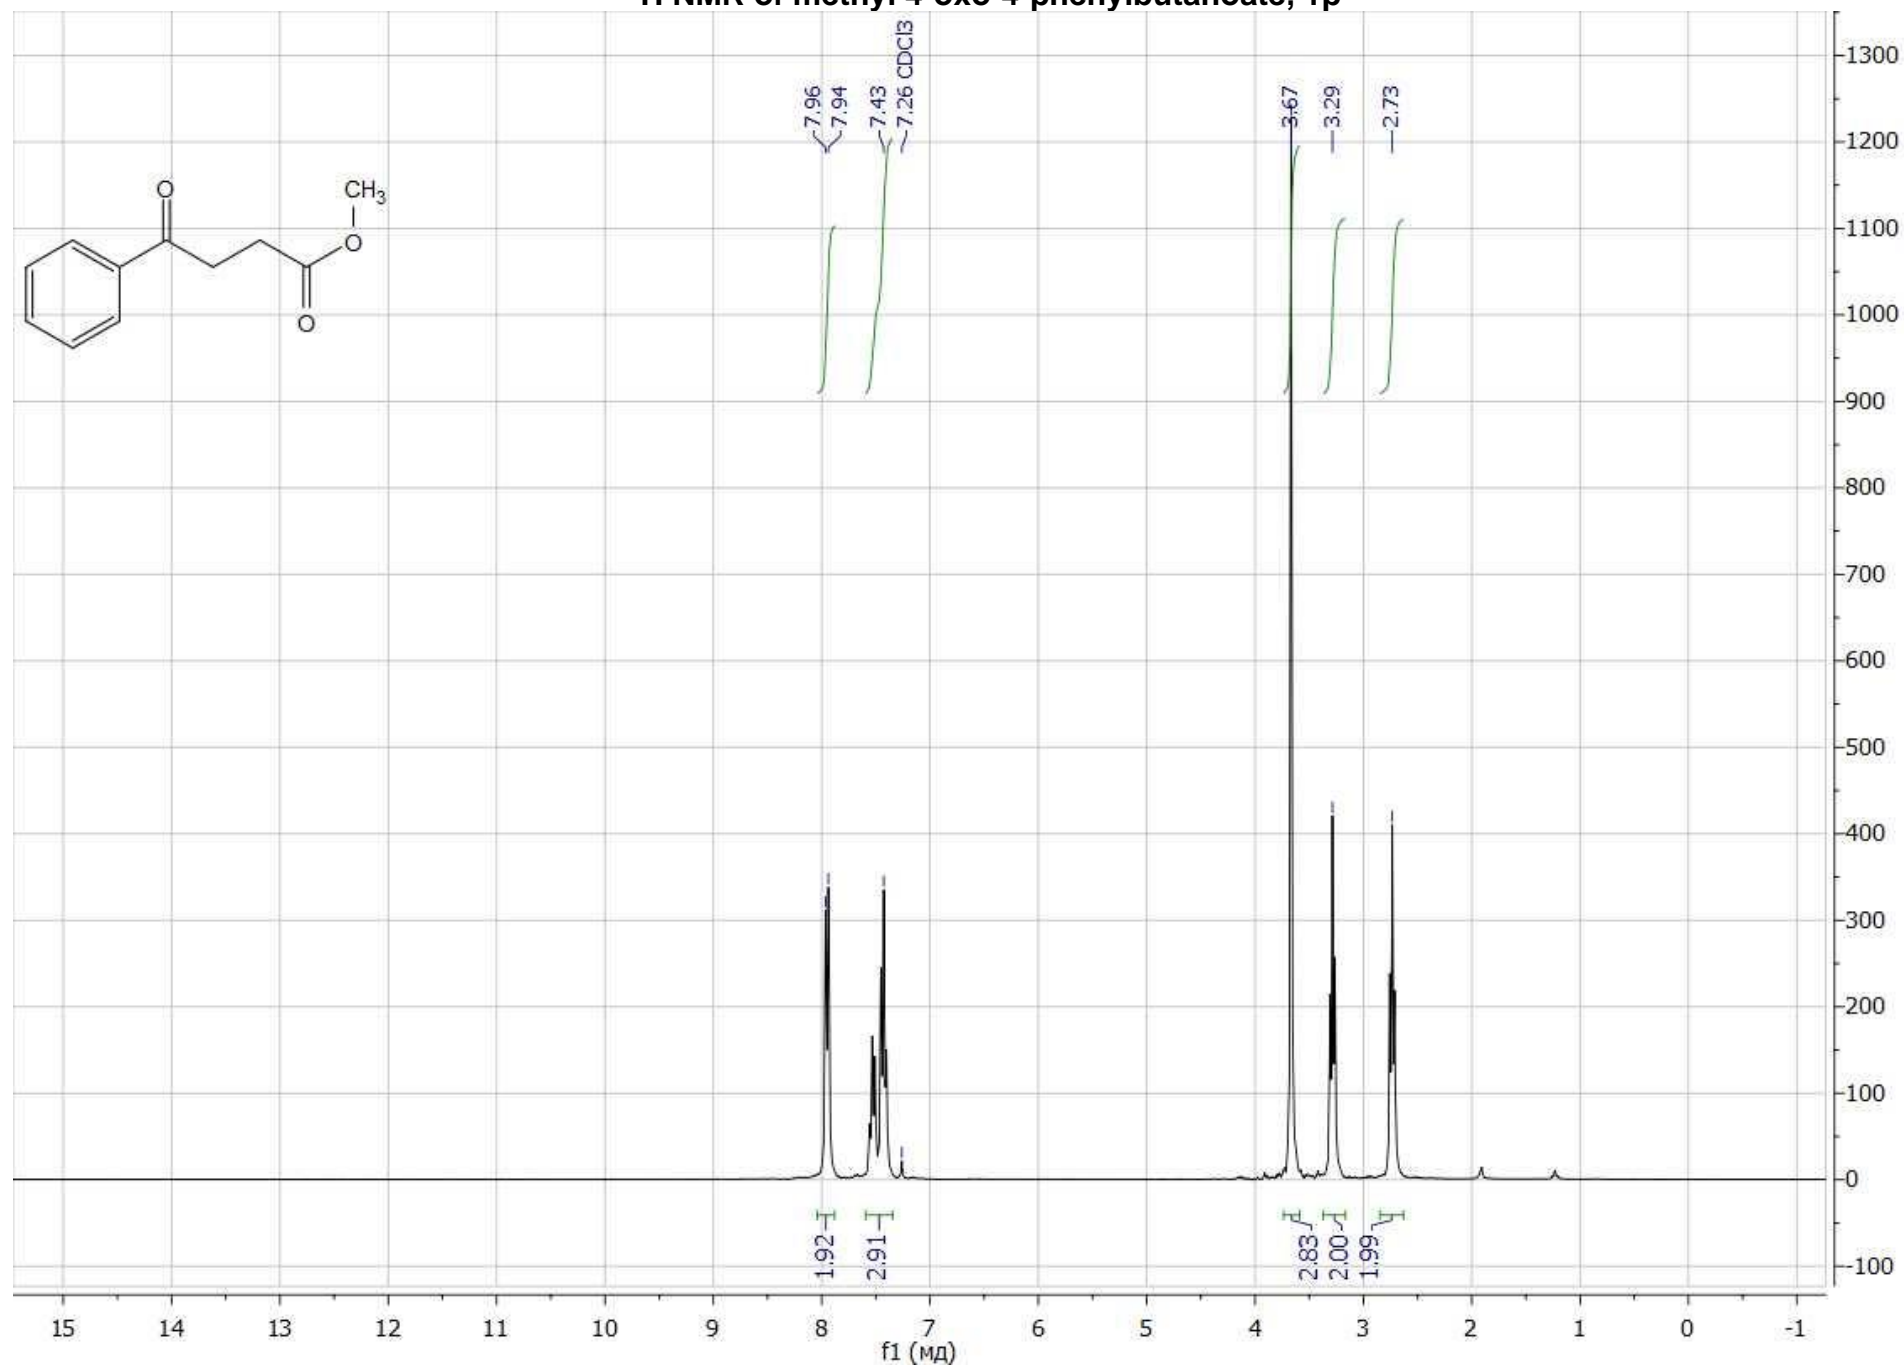

<sup>13</sup>C NMR of methyl 4-oxo-4-phenylbutanoate, 1p

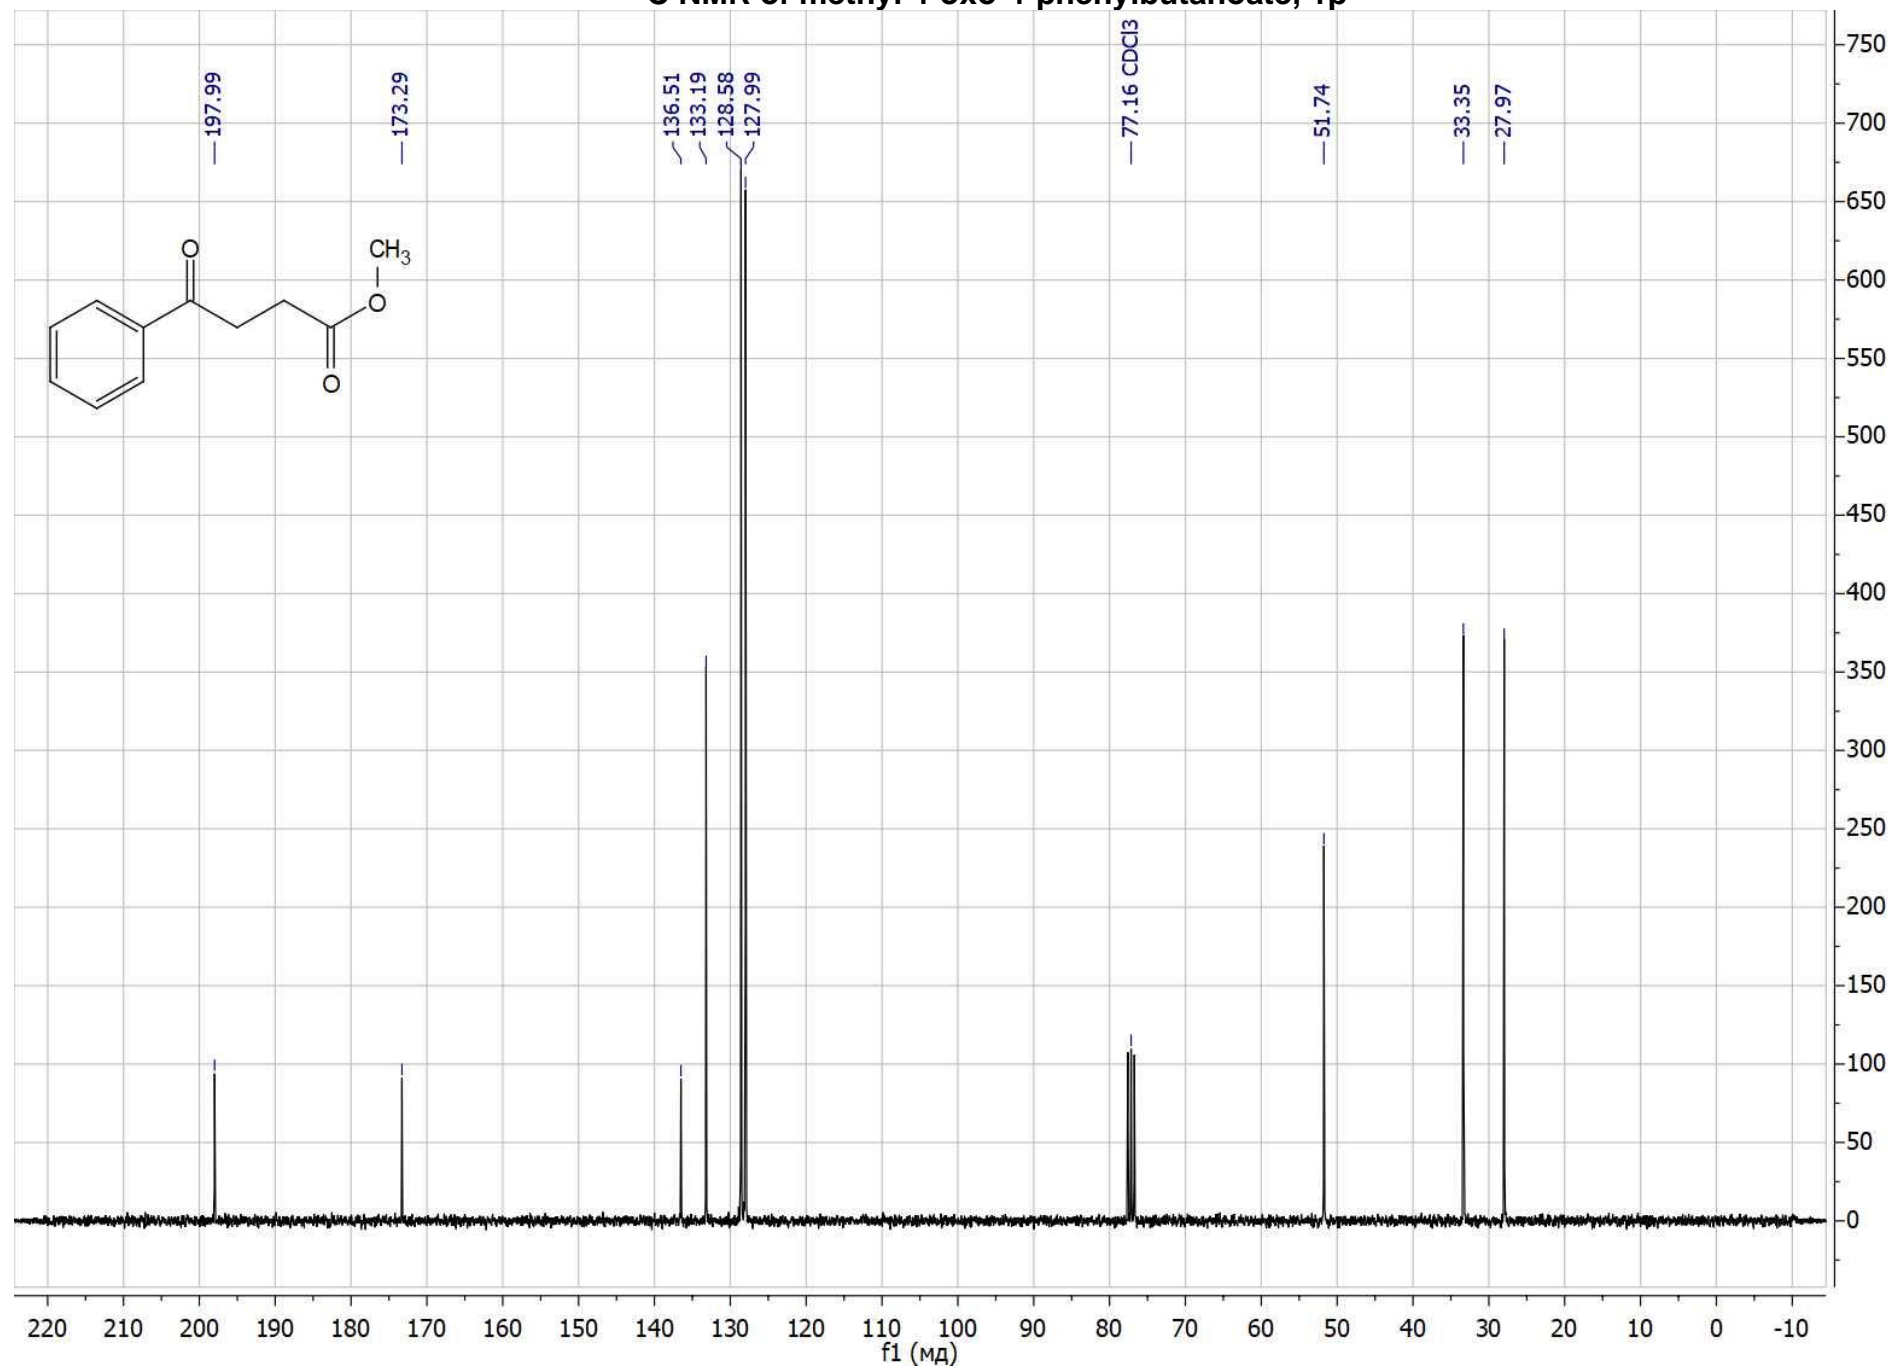

HRMS of starting  $\gamma$ -ketoesters 1  
HRMS of ethyl 3-(4-nitrobenzyl)-4-oxopentanoate, 1b

Display Report

Analysis Info

Analysis Name D:\Data\Chizhov\Terentiev\Wilbb-2142\_&clblow.d  
Method tune\_low.m  
Sample Name /TERN BB-2142  
Comment CH3CN 100 %, dil. 200, calibrant added

Acquisition Date 11.10.2019 18:31:34  
Operator BDAL@DE  
Instrument / Ser# micrOTOF 10248

Acquisition Parameter

|             |            |                      |          |                  |           |
|-------------|------------|----------------------|----------|------------------|-----------|
| Source Type | ESI        | Ion Polarity         | Positive | Set Nebulizer    | 0.4 Bar   |
| Focus       | Not active |                      |          | Set Dry Heater   | 180 °C    |
| Scan Begin  | 50 m/z     | Set Capillary        | 4500 V   | Set Dry Gas      | 4.0 l/min |
| Scan End    | 3000 m/z   | Set End Plate Offset | -500 V   | Set Divert Valve | Waste     |

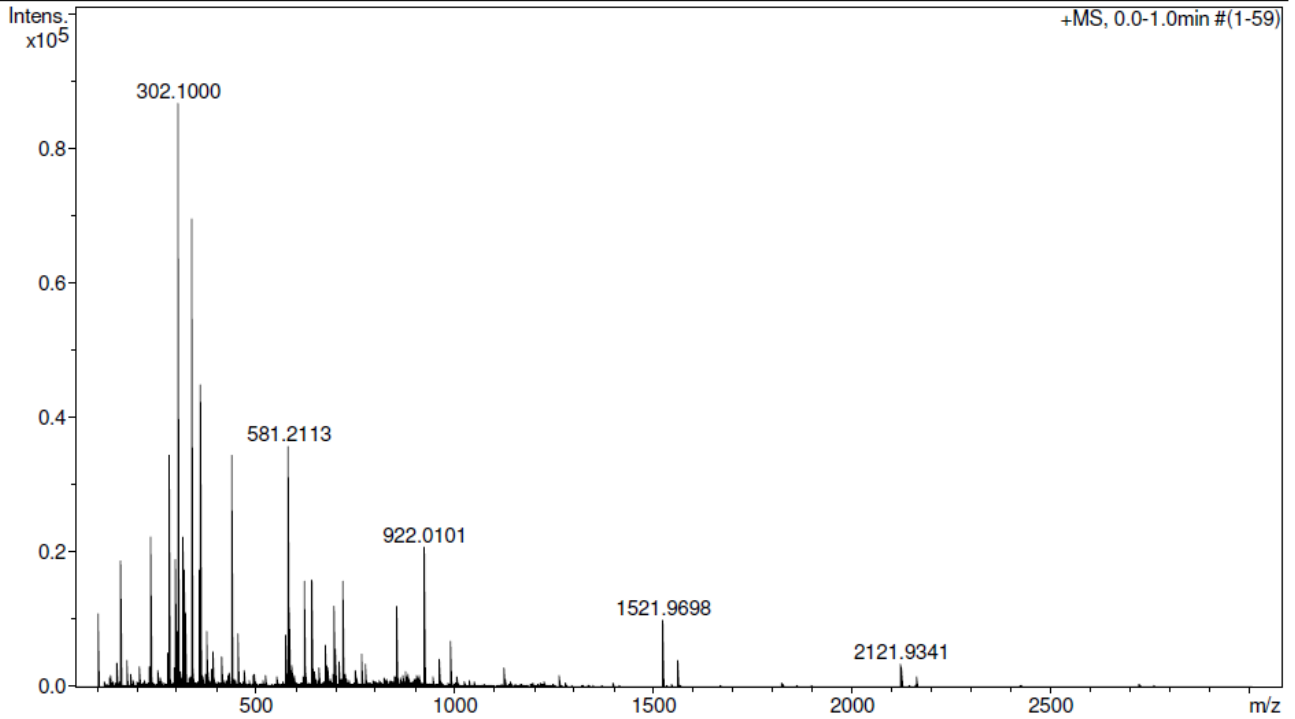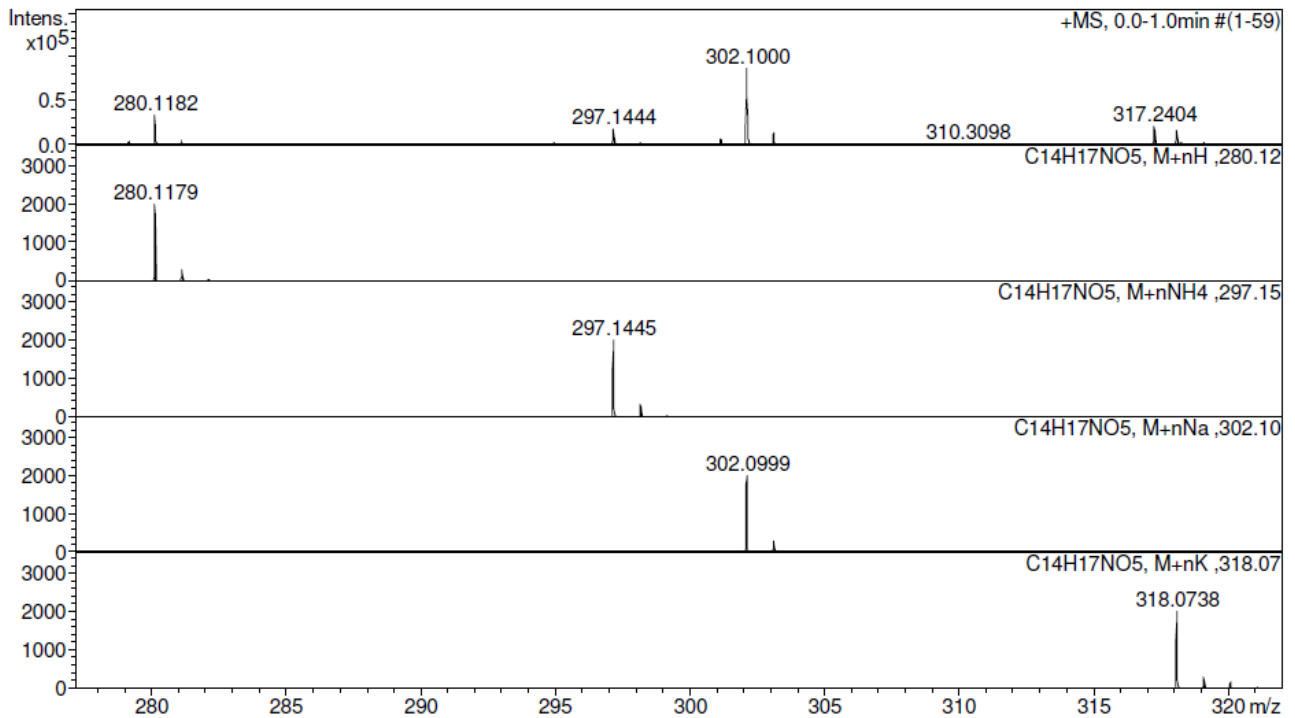



HRMS of ethyl 3-(4-chlorobenzyl)-4-oxopentanoate, 1c

Display Report

Analysis Info

Analysis Name D:\Data\Chizhov\Terentiev\Wilbb-2148\_&clblow.d  
 Method tune\_low.m  
 Sample Name /TERN BB-2148  
 Comment CH3CN 100 %, dil. 200, calibrant added

Acquisition Date 11.10.2019 18:01:31

Operator BDAL@DE  
 Instrument / Ser# micrOTOF 10248

Acquisition Parameter

|             |            |                      |          |                  |           |
|-------------|------------|----------------------|----------|------------------|-----------|
| Source Type | ESI        | Ion Polarity         | Positive | Set Nebulizer    | 0.4 Bar   |
| Focus       | Not active |                      |          | Set Dry Heater   | 180 °C    |
| Scan Begin  | 50 m/z     | Set Capillary        | 4500 V   | Set Dry Gas      | 4.0 l/min |
| Scan End    | 3000 m/z   | Set End Plate Offset | -500 V   | Set Divert Valve | Waste     |

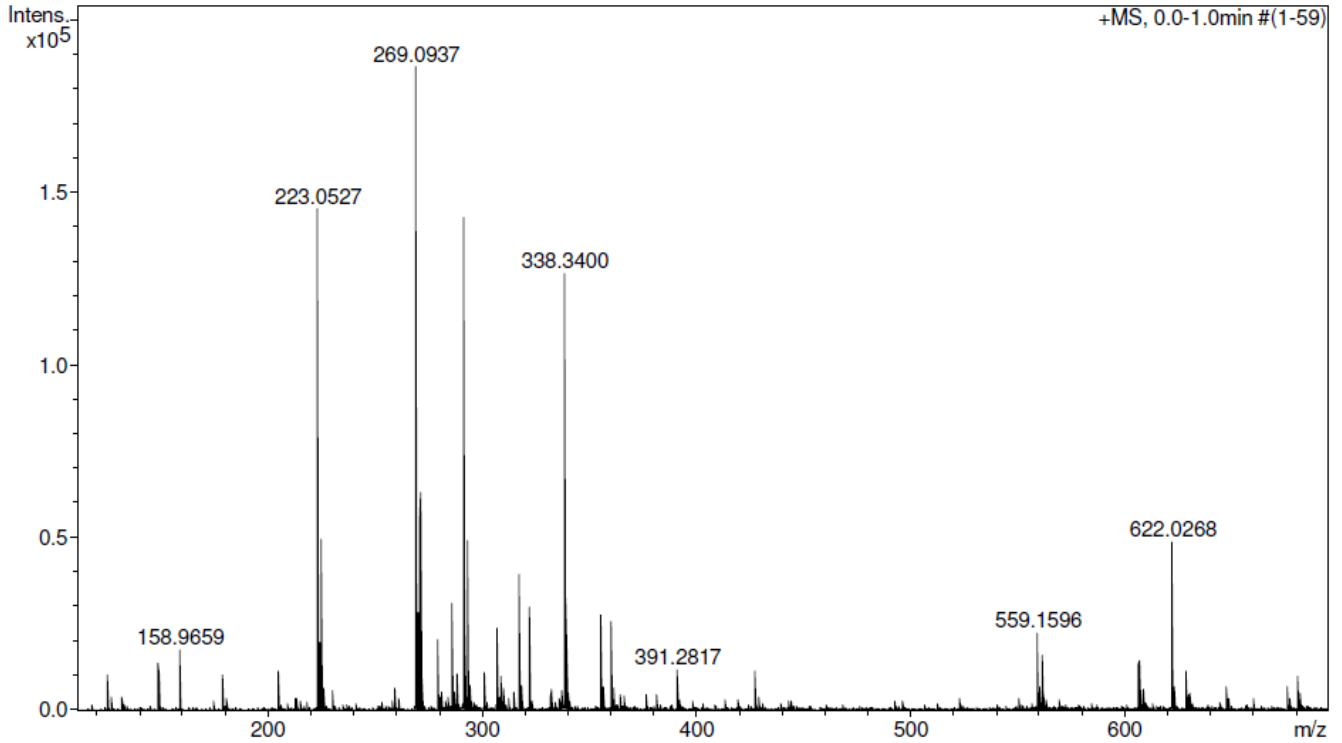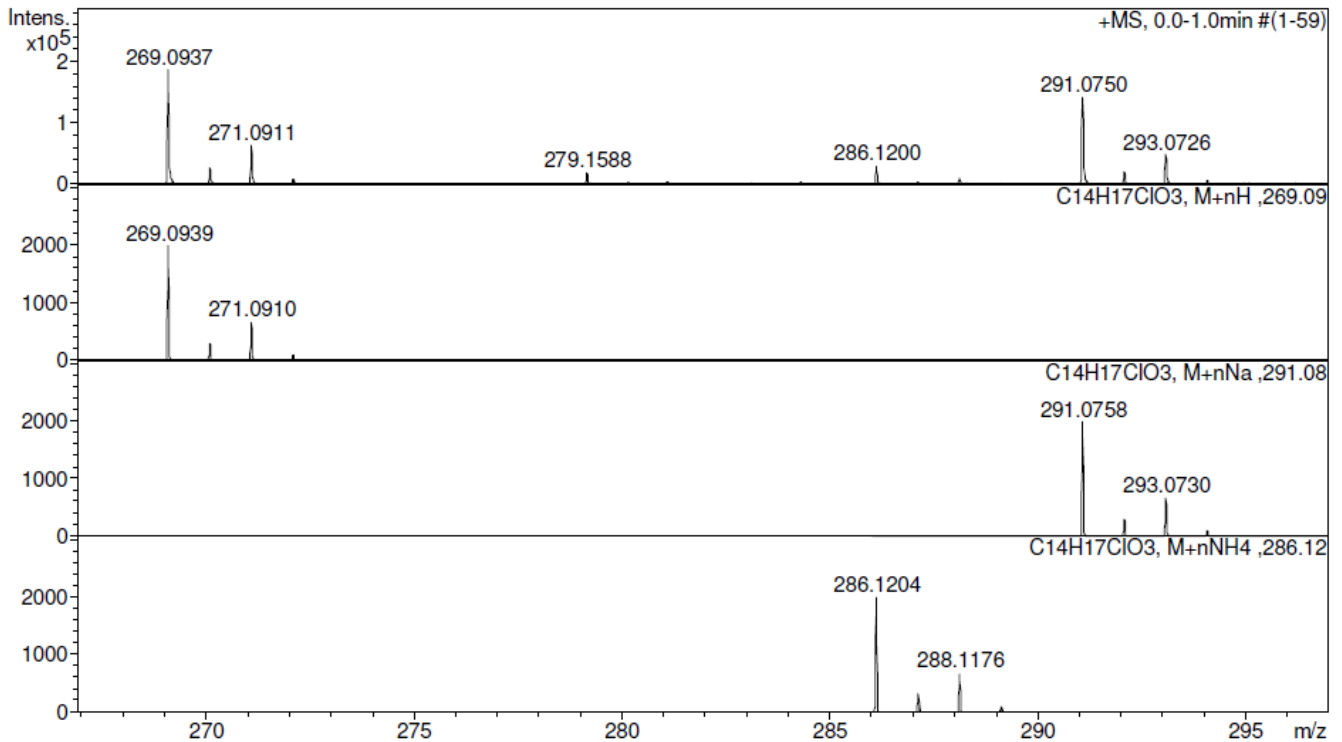

# HRMS of ethyl 3-(4-bromobenzyl)-4-oxopentanoate, 1d

## Display Report

### Analysis Info

Analysis Name: D:\Data\Kolotyrkina\2019\Barsegyan\1224014.d  
 Method: tune\_50-1600.m  
 Sample Name: /TERN Brs402  
 Comment: C14H17BrO3 mH 313.0433 calibrant added

Acquisition Date: 24.12.2019 14:32:54  
 Operator: BDAL@DE  
 Instrument / Ser#: micrOTOF 10248

### Acquisition Parameter

|             |            |                      |          |                  |           |
|-------------|------------|----------------------|----------|------------------|-----------|
| Source Type | ESI        | Ion Polarity         | Positive | Set Nebulizer    | 1.0 Bar   |
| Focus       | Not active |                      |          | Set Dry Heater   | 200 °C    |
| Scan Begin  | 50 m/z     | Set Capillary        | 4500 V   | Set Dry Gas      | 4.0 l/min |
| Scan End    | 1600 m/z   | Set End Plate Offset | -500 V   | Set Divert Valve | Waste     |

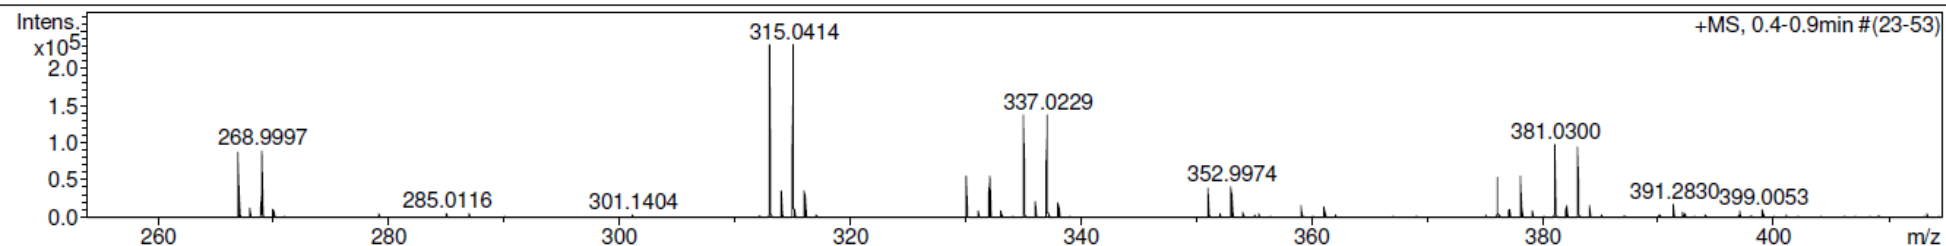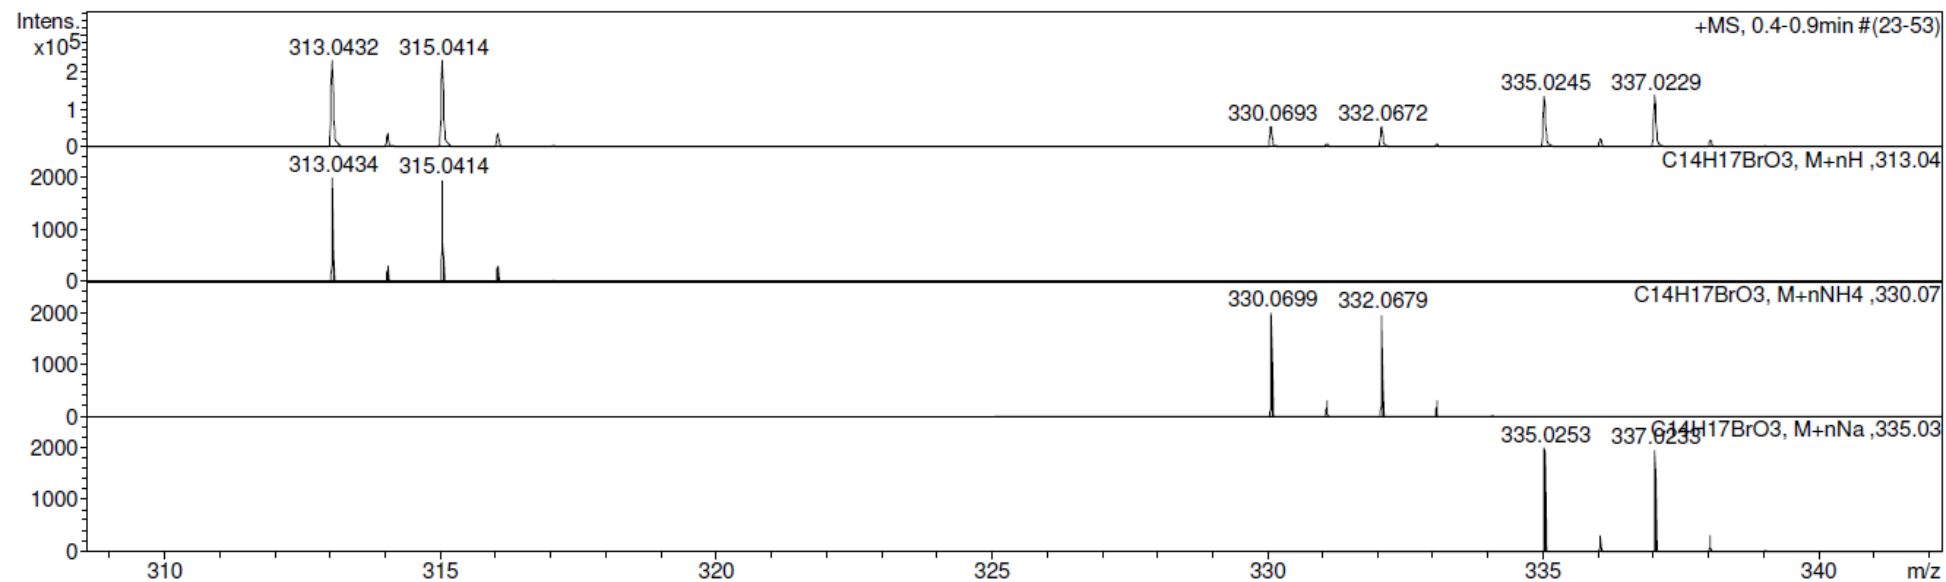

Display Report

Analysis Info

Analysis Name D:\Data\Chizhov\Terentiev\Wilbb-2149\_&clblow.d  
 Method tune\_low.m  
 Sample Name /TERN BB-2149  
 Comment CH3CN 100 %, dil. 2000, calibrant added

Acquisition Date 11.10.2019 18:42:59  
 Operator BDAL@DE  
 Instrument / Ser# micrOTOF 10248

Acquisition Parameter

|             |            |                      |          |                  |           |
|-------------|------------|----------------------|----------|------------------|-----------|
| Source Type | ESI        | Ion Polarity         | Positive | Set Nebulizer    | 0.4 Bar   |
| Focus       | Not active |                      |          | Set Dry Heater   | 180 °C    |
| Scan Begin  | 50 m/z     | Set Capillary        | 4500 V   | Set Dry Gas      | 4.0 l/min |
| Scan End    | 3000 m/z   | Set End Plate Offset | -500 V   | Set Divert Valve | Waste     |

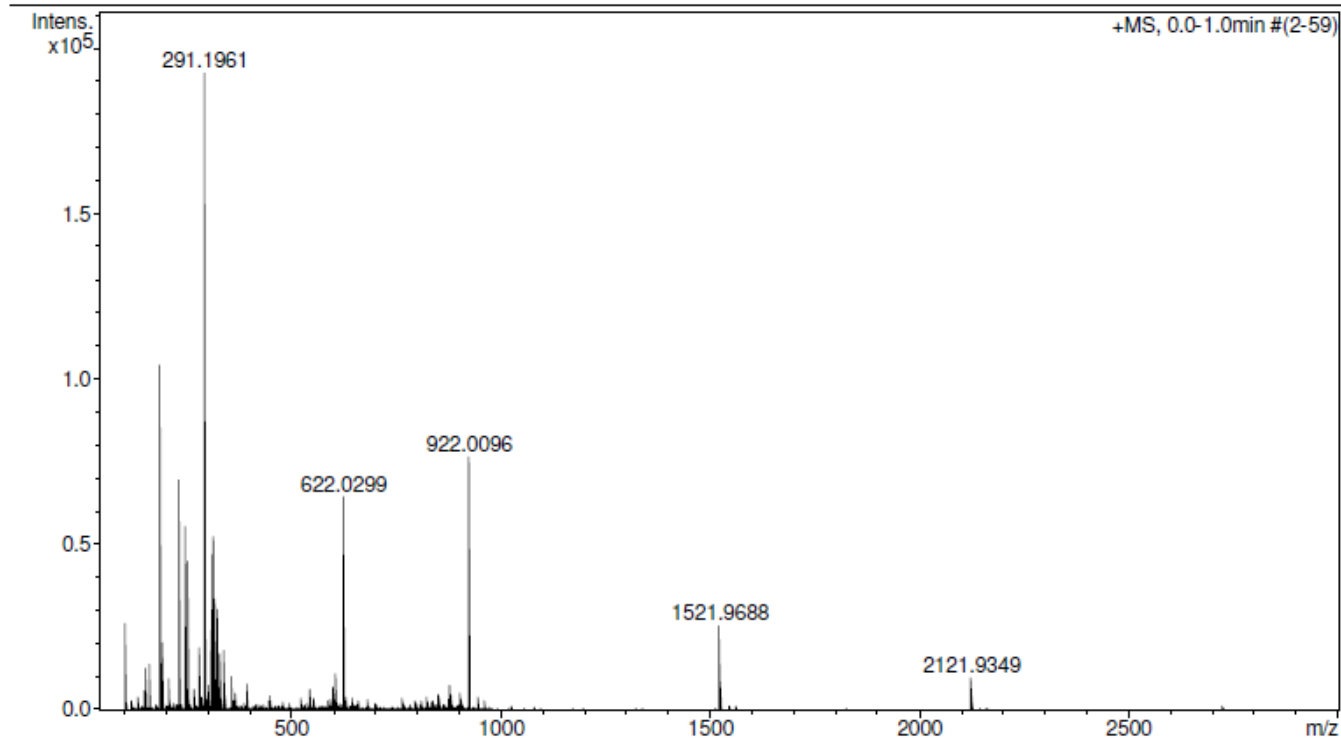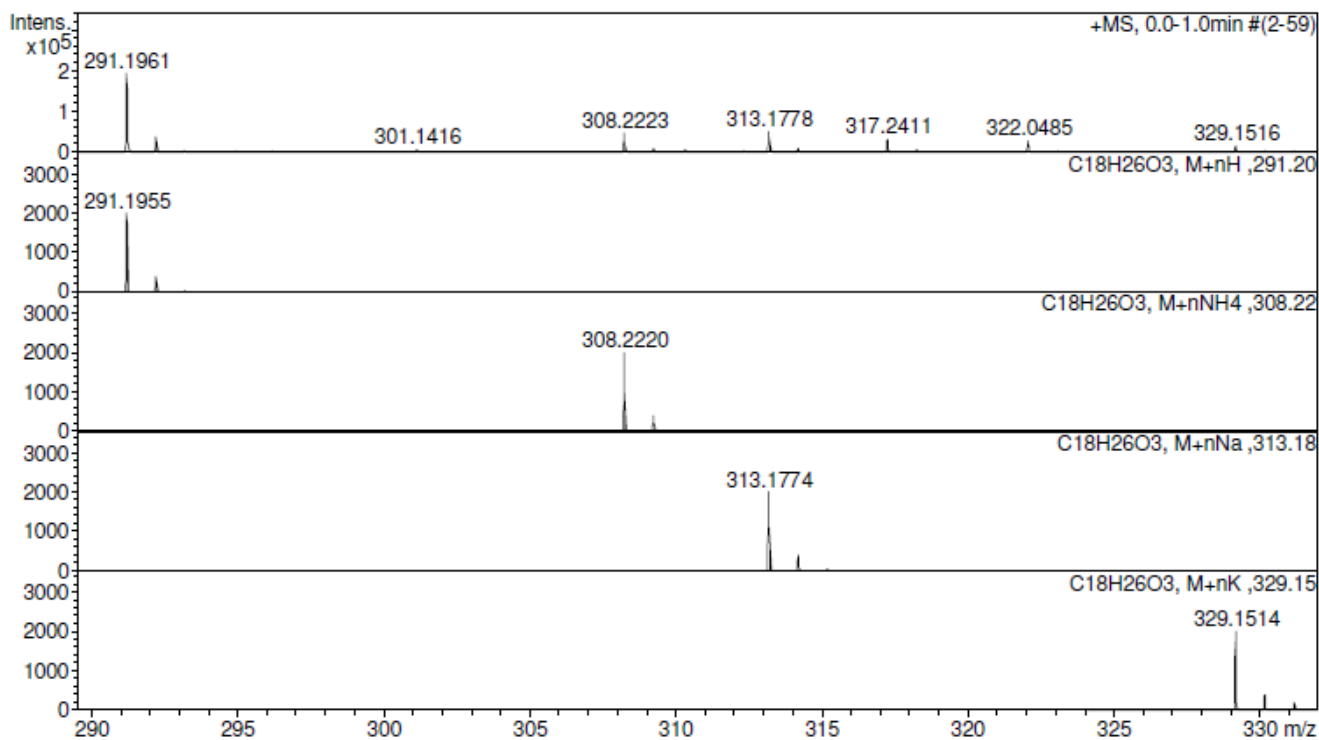

HRMS of ethyl 3-(4-methylbenzyl)-4-oxopentanoate, 1f

Display Report

Analysis Info

Analysis Name D:\Data\Chizhov\Terentiev\Wilse-35\_&clblow.d  
 Method tune\_low.m  
 Sample Name /TERN SE-35  
 Comment CH3CN 100 %, dil. 2000, calibrant added

Acquisition Date 29.11.2019 17:11:28

Operator BDAL@DE  
 Instrument / Ser# micrOTOF 10248

Acquisition Parameter

|             |            |                      |          |                  |           |
|-------------|------------|----------------------|----------|------------------|-----------|
| Source Type | ESI        | Ion Polarity         | Positive | Set Nebulizer    | 0.4 Bar   |
| Focus       | Not active |                      |          | Set Dry Heater   | 180 °C    |
| Scan Begin  | 50 m/z     | Set Capillary        | 4500 V   | Set Dry Gas      | 4.0 l/min |
| Scan End    | 3000 m/z   | Set End Plate Offset | -500 V   | Set Divert Valve | Waste     |

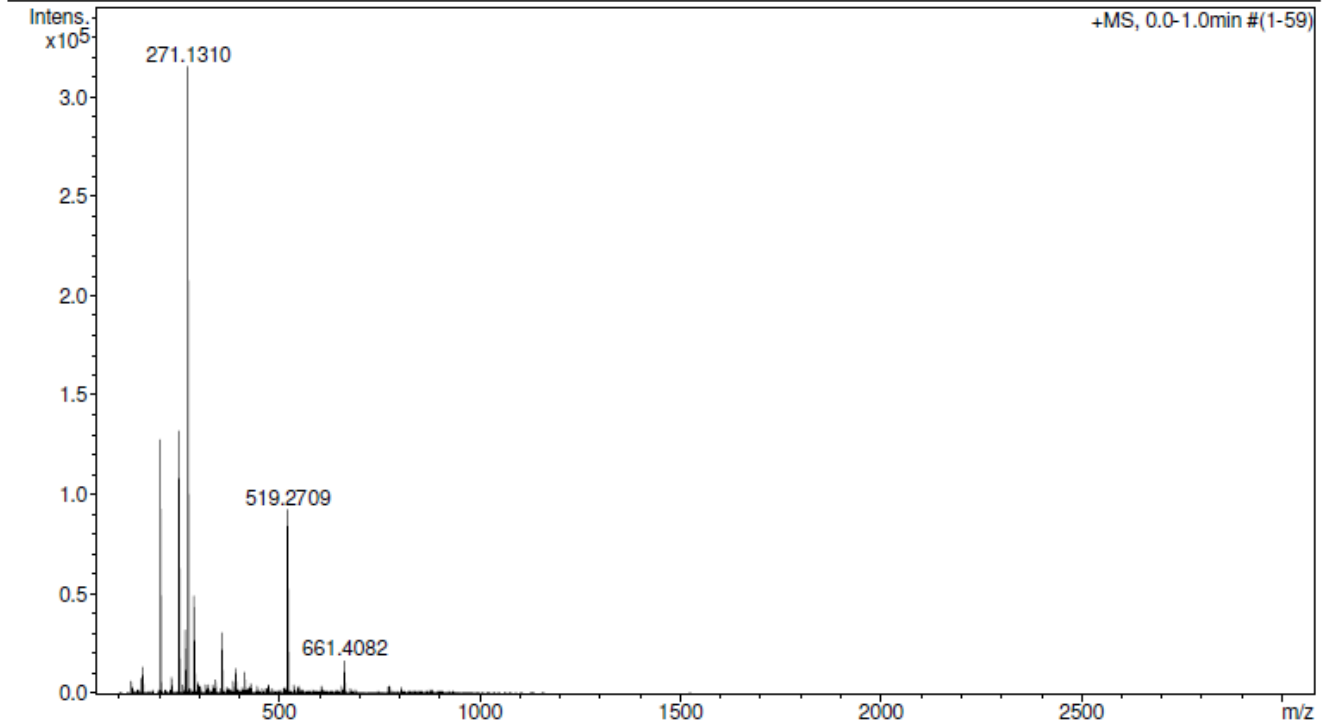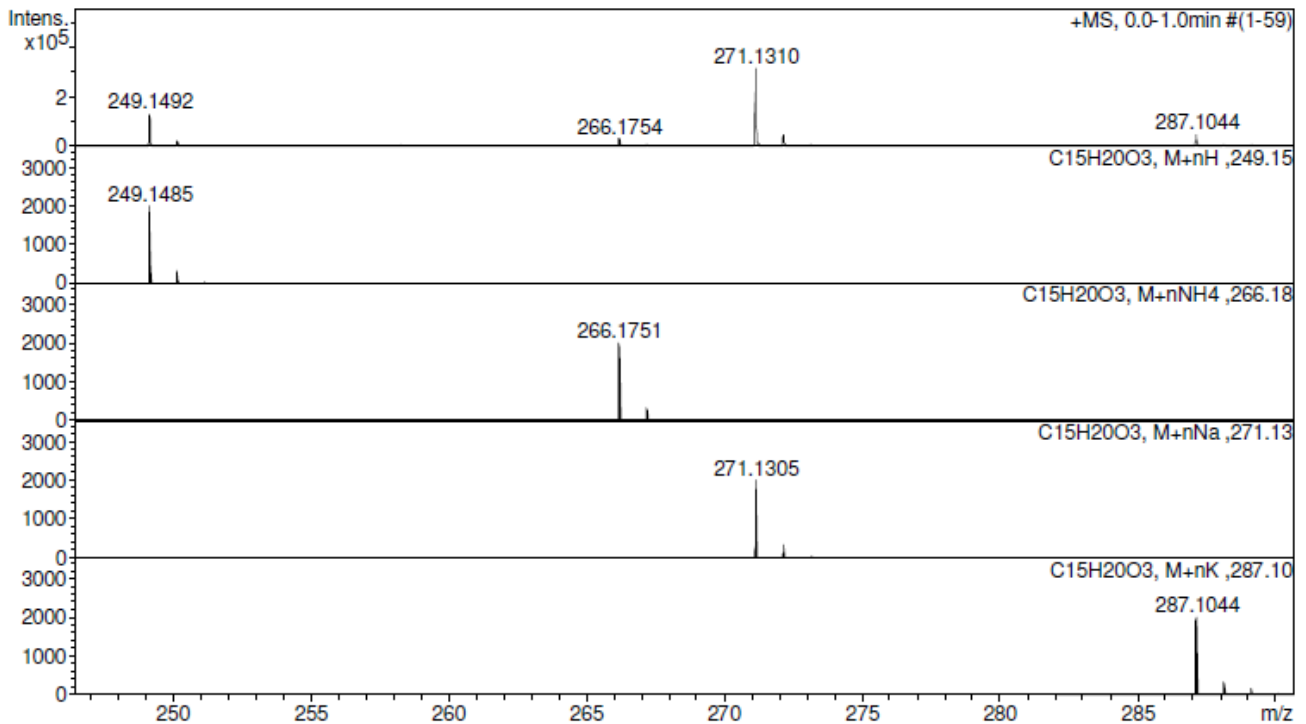

# HRMS of ethyl 3-(3-methylbenzyl)-4-oxopentanoate, 1g

## Display Report

**Analysis Info**

Analysis Name D:\Data\Chizhov\Terentiev\Wilse-28\_cblow.d  
 Method tune\_low.m  
 Sample Name /TERN SE-28  
 Comment CH3CN 100 %, dil. 2000, calibrant added

Acquisition Date 11.10.2019 18:48:57  
 Operator BDAL@DE  
 Instrument / Ser# micrOTOF 10248

**Acquisition Parameter**

|             |            |                      |          |                  |           |
|-------------|------------|----------------------|----------|------------------|-----------|
| Source Type | ESI        | Ion Polarity         | Positive | Set Nebulizer    | 0.4 Bar   |
| Focus       | Not active |                      |          | Set Dry Heater   | 180 °C    |
| Scan Begin  | 50 m/z     | Set Capillary        | 4500 V   | Set Dry Gas      | 4.0 l/min |
| Scan End    | 3000 m/z   | Set End Plate Offset | -500 V   | Set Divert Valve | Waste     |

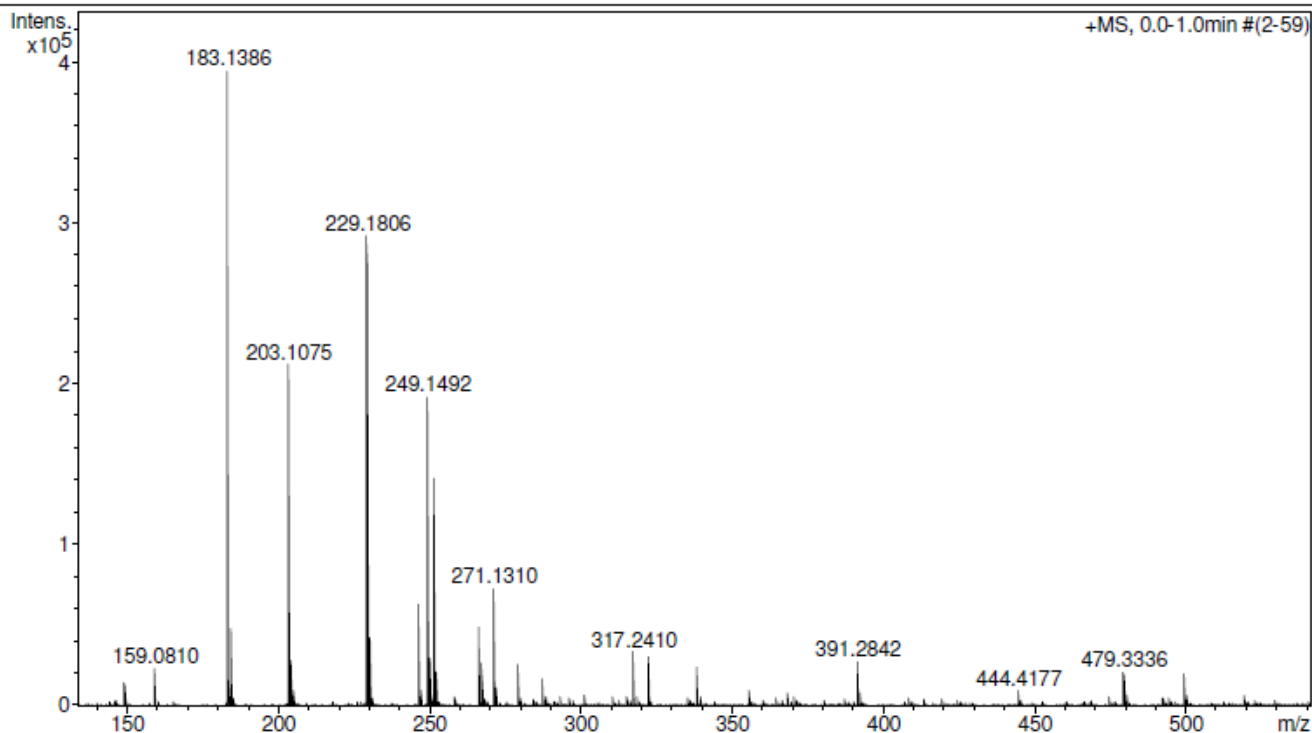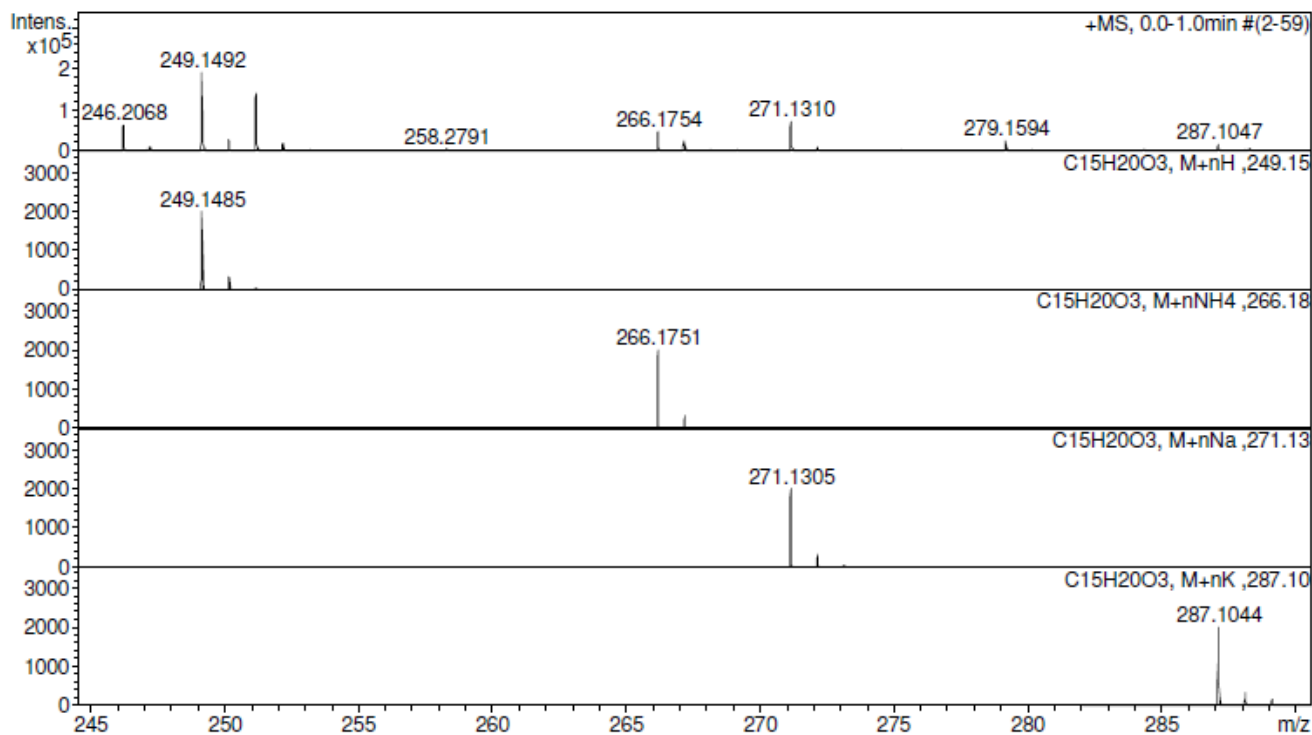

# HRMS of ethyl 3-(3-methoxybenzyl)-4-oxopentanoate, 1h

## Display Report

**Analysis Info**

Analysis Name D:\Data\Kolotyorkina\2019\Viil\1031024.d  
 Method tune\_50-1600.m  
 Sample Name /TERN SE-31  
 Comment C15H20O4 mH 265.1434 calibrant added

Acquisition Date 31.10.2019 17:02:48

Operator BDAL@DE  
 Instrument / Ser# micrOTOF 10248

**Acquisition Parameter**

|             |            |                      |          |                  |           |
|-------------|------------|----------------------|----------|------------------|-----------|
| Source Type | ESI        | Ion Polarity         | Positive | Set Nebulizer    | 1.0 Bar   |
| Focus       | Not active |                      |          | Set Dry Heater   | 200 °C    |
| Scan Begin  | 50 m/z     | Set Capillary        | 4500 V   | Set Dry Gas      | 4.0 l/min |
| Scan End    | 1600 m/z   | Set End Plate Offset | -500 V   | Set Divert Valve | Waste     |

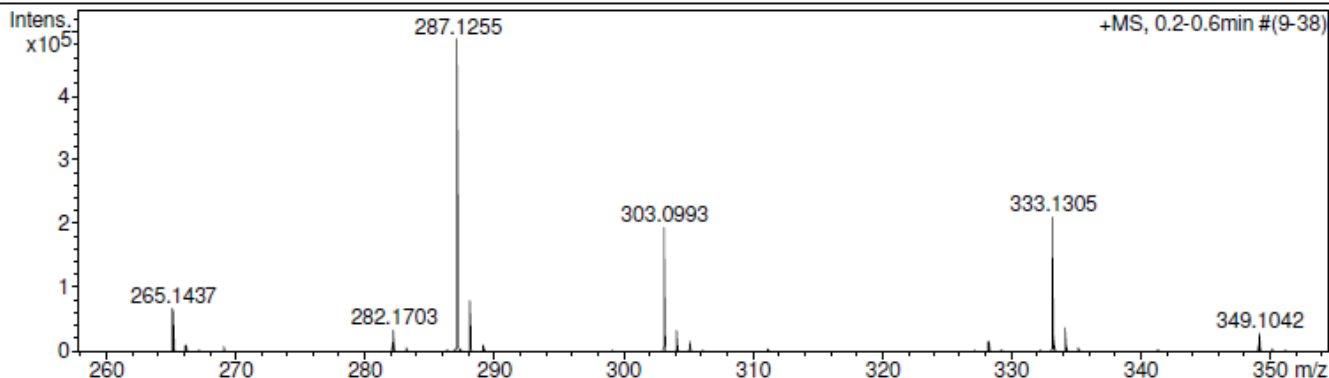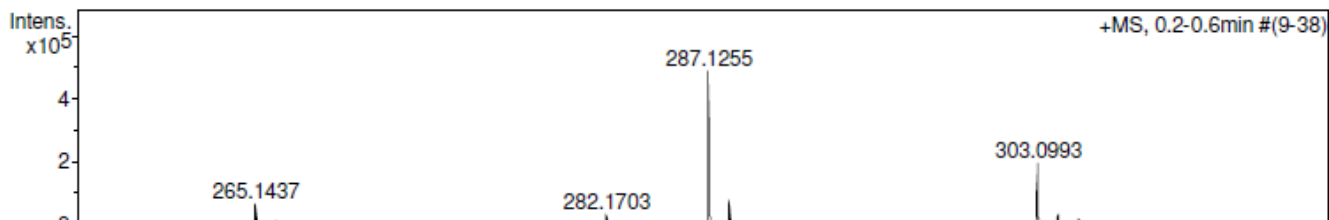

C15H20O4, M+nH ,265.14

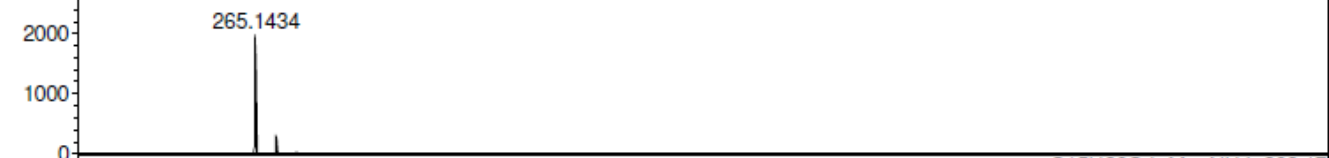

C15H20O4, M+nNH4 ,282.17

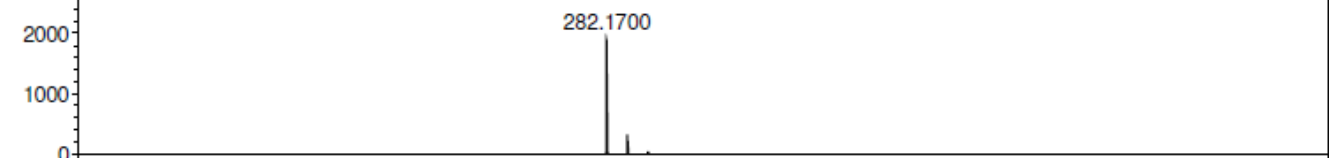

C15H20O4, M+nNa ,287.13

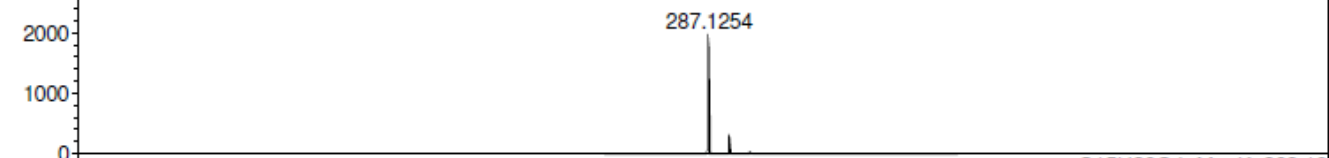

C15H20O4, M+nK ,303.10

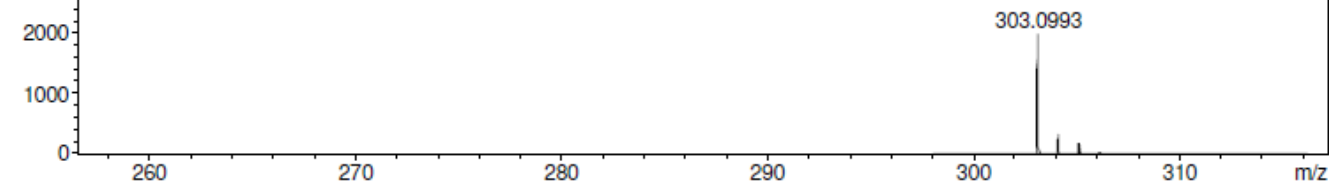

# HRMS of ethyl 3-(2-chlorobenzyl)-4-oxopentanoate, 1i

## Display Report

**Analysis Info**

Analysis Name D:\Data\Kolotyrkina\2019\Barsegyan\1120064.d  
 Method tune\_50-1600.m  
 Sample Name /TERN RES-10  
 Comment C14H17ClO3 mH 269.0949 calibrant added

Acquisition Date 20.11.2019 18:36:20  
 Operator BDAL@DE  
 Instrument / Ser# micrOTOF 10248

**Acquisition Parameter**

|             |            |                      |          |                  |           |
|-------------|------------|----------------------|----------|------------------|-----------|
| Source Type | ESI        | Ion Polarity         | Positive | Set Nebulizer    | 1.0 Bar   |
| Focus       | Not active |                      |          | Set Dry Heater   | 200 °C    |
| Scan Begin  | 50 m/z     | Set Capillary        | 4500 V   | Set Dry Gas      | 4.0 l/min |
| Scan End    | 1600 m/z   | Set End Plate Offset | -500 V   | Set Divert Valve | Waste     |

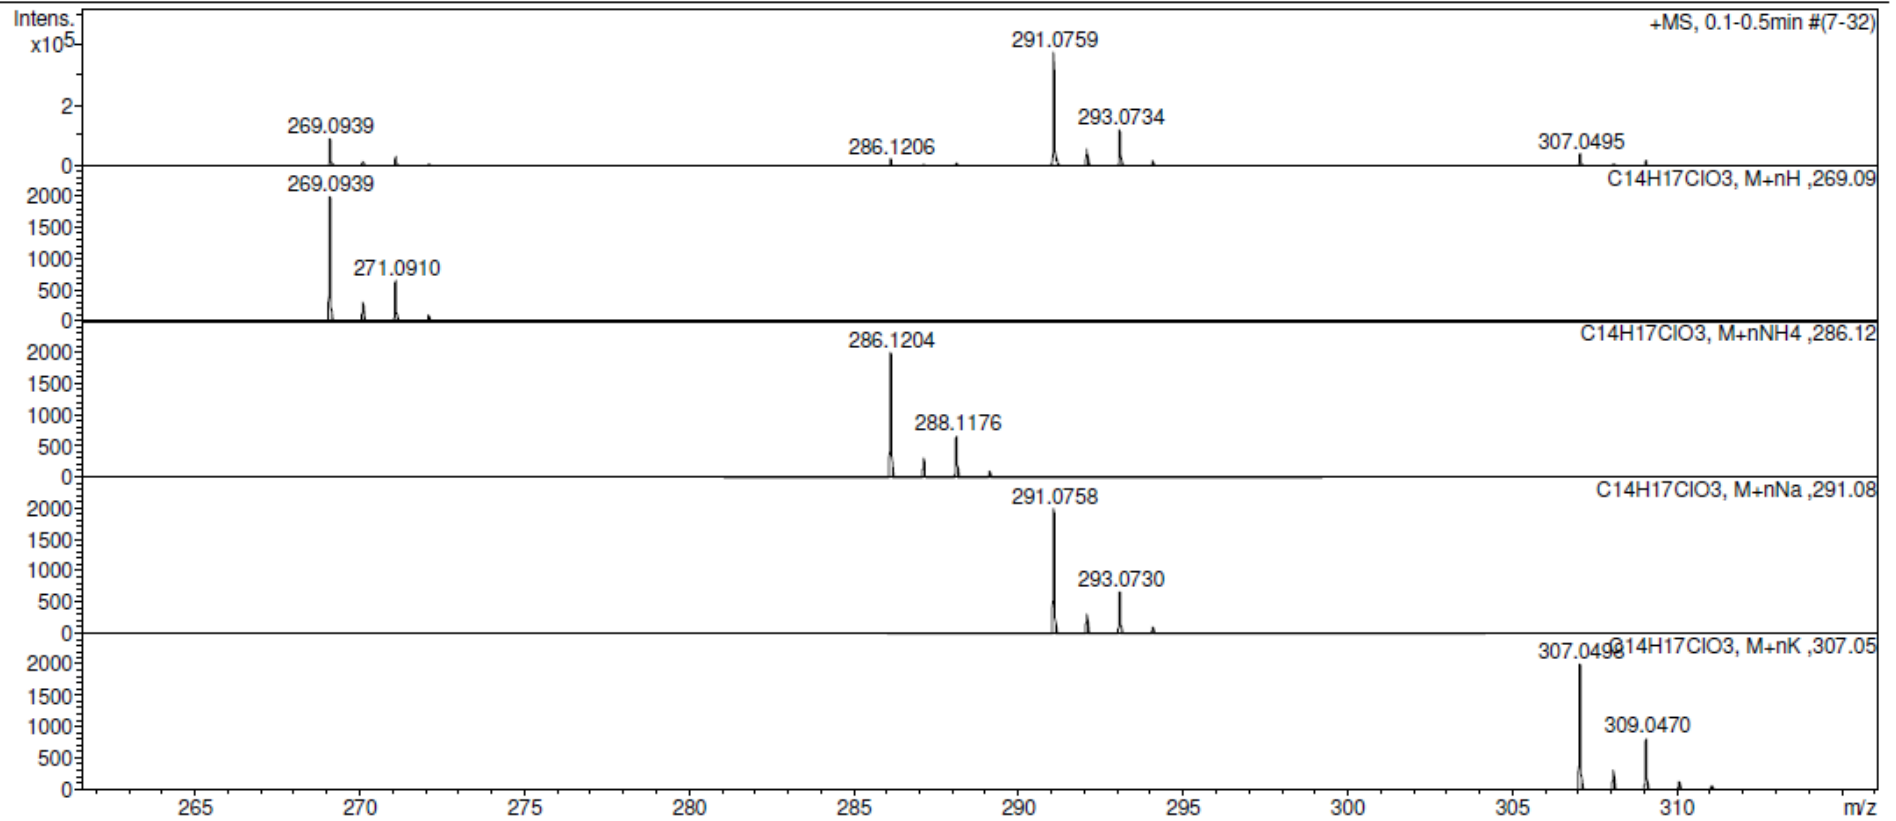

# HRMS of ethyl 3-acetylnonanoate, 1k

## Display Report

**Analysis Info**

Analysis Name D:\Data\Chizhov\Terentiev\Wilbb-2143\_&clblow.d  
 Method tune\_low.m  
 Sample Name /TERN BB-2143  
 Comment CH3CN 100 %, dil. 200, calibrant added

Acquisition Date 11.10.2019 18:35:15  
 Operator BDAL@DE  
 Instrument / Ser# micrOTOF 10248

**Acquisition Parameter**

|             |            |                      |          |                  |           |
|-------------|------------|----------------------|----------|------------------|-----------|
| Source Type | ESI        | Ion Polarity         | Positive | Set Nebulizer    | 0.4 Bar   |
| Focus       | Not active |                      |          | Set Dry Heater   | 180 °C    |
| Scan Begin  | 50 m/z     | Set Capillary        | 4500 V   | Set Dry Gas      | 4.0 l/min |
| Scan End    | 3000 m/z   | Set End Plate Offset | -500 V   | Set Divert Valve | Waste     |

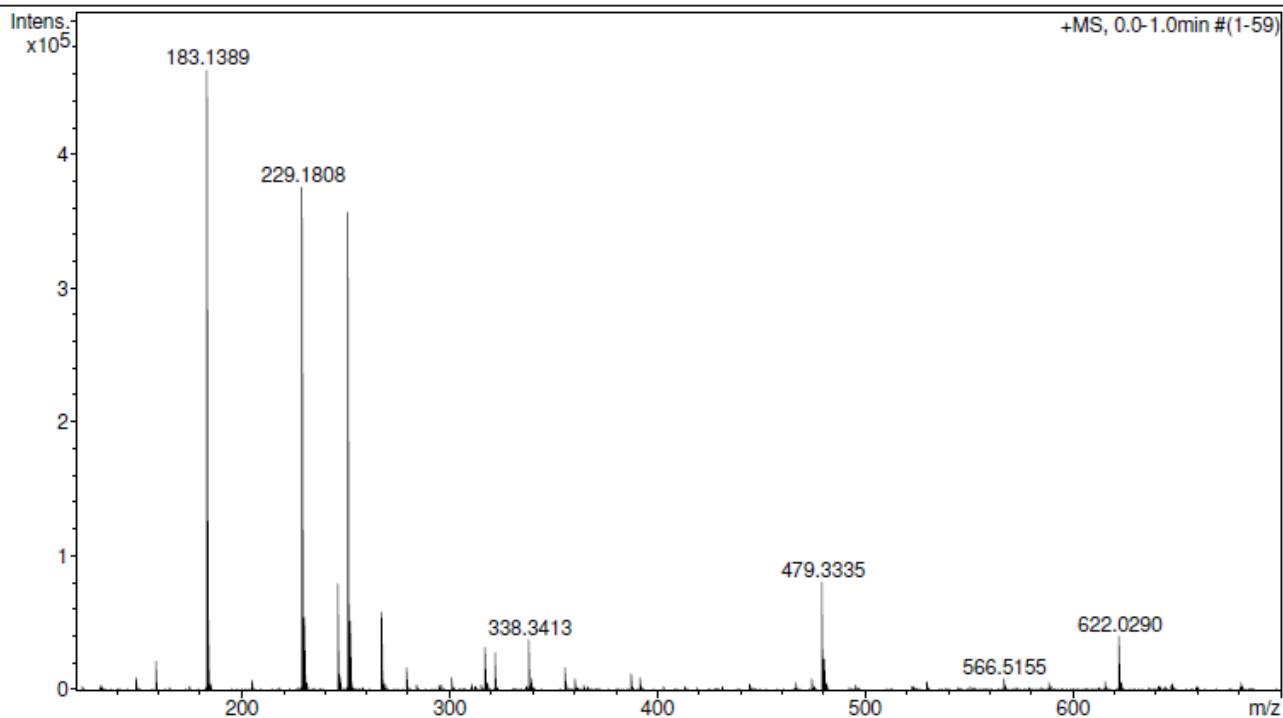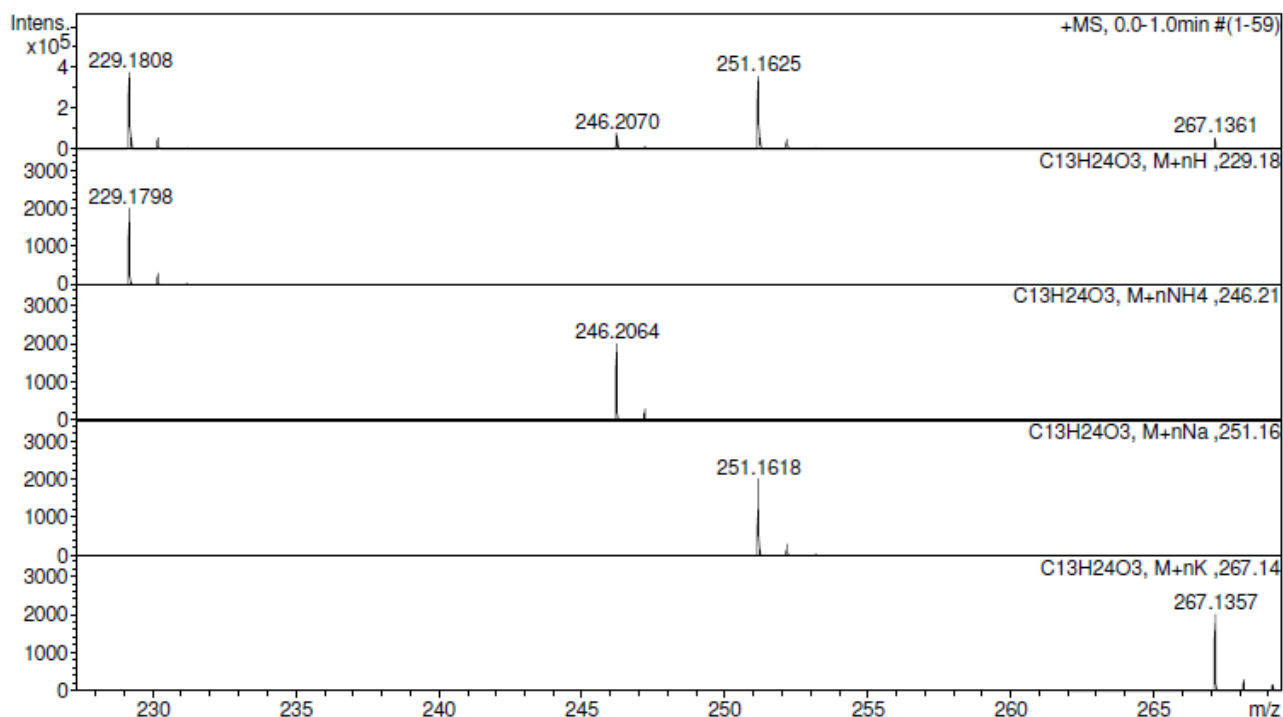



# HRMS of ethyl 3-acetylundecanoate, 1I

## Display Report

**Analysis Info**

Analysis Name D:\Data\Chizhov\Terentiev\Barsegyan\brs326\_&clblow.d  
 Method tune\_low.m  
 Sample Name /TERN Brs326  
 Comment CH3CN 100 %, dil. 200, calibrant added

Acquisition Date 27.09.2019 15:19:28  
 Operator BDAL@DE  
 Instrument / Ser# micrOTOF 10248

**Acquisition Parameter**

|             |            |                      |          |                  |           |
|-------------|------------|----------------------|----------|------------------|-----------|
| Source Type | ESI        | Ion Polarity         | Positive | Set Nebulizer    | 0.4 Bar   |
| Focus       | Not active | Set Capillary        | 4500 V   | Set Dry Heater   | 180 °C    |
| Scan Begin  | 50 m/z     | Set End Plate Offset | -500 V   | Set Dry Gas      | 4.0 l/min |
| Scan End    | 3000 m/z   |                      |          | Set Divert Valve | Waste     |

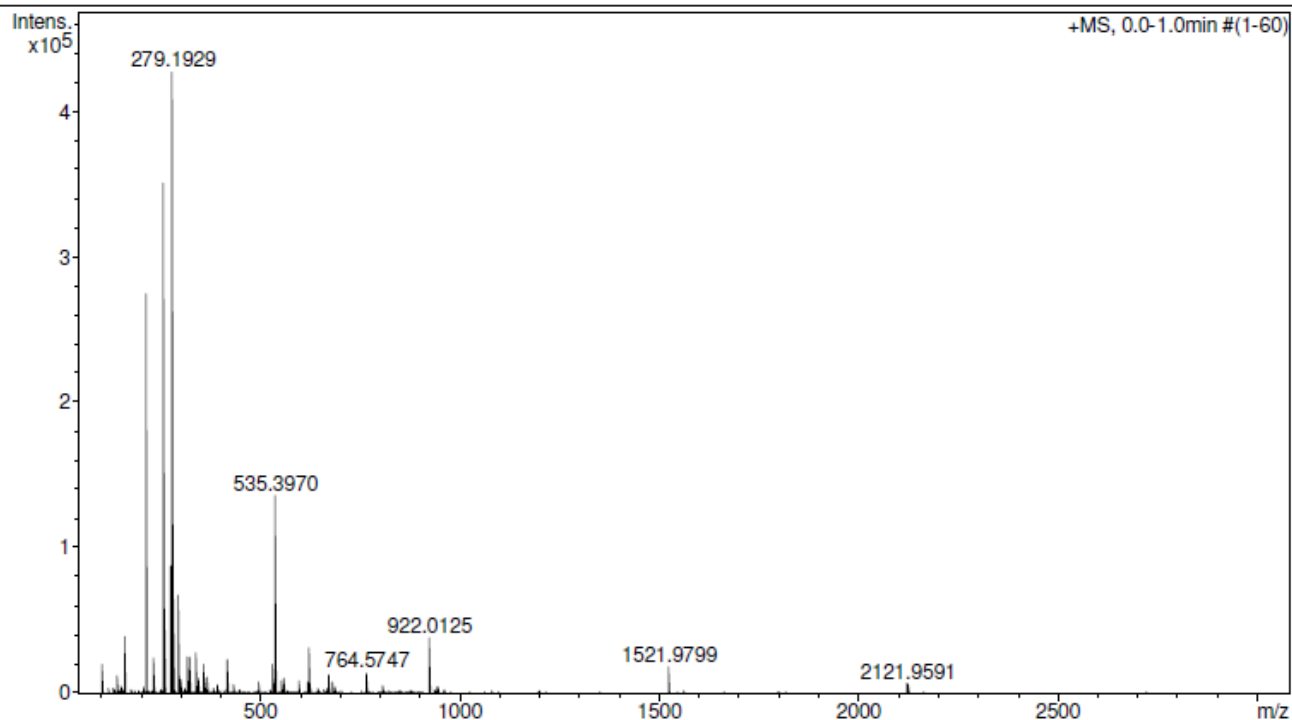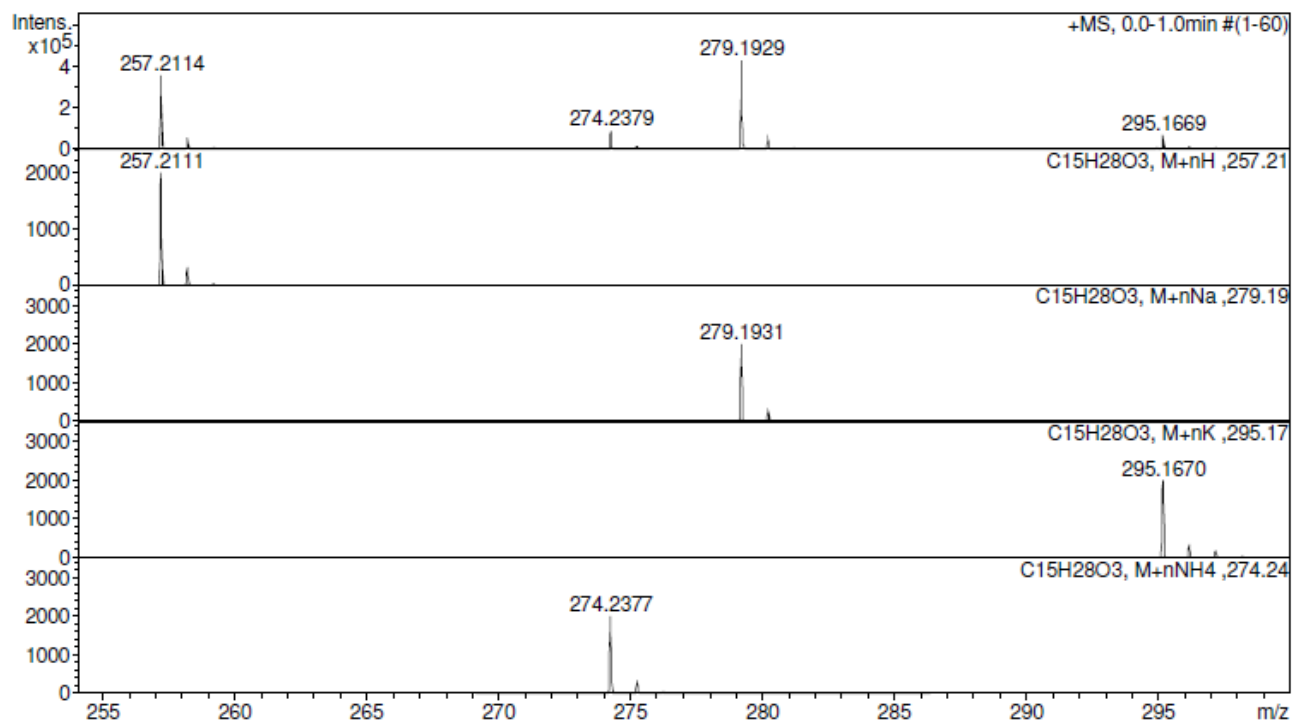

Supplement: SC-011-D0SC01025A-s001.pdf [file SC-011-D0SC01025A-s001.pdf]
