# Supplementary material for: Synthesis of unstrained Criegee intermediates: inverse α-effect and other protective stereoelectronic forces can stop Baeyer–Villiger rearrangement of γ-hydroperoxy-γ-peroxylactones
Source: PubMed Central journal article supplement — Chem Sci. 2020 May 6;11(20):5313–22. doi: 10.1039/d0sc01025a (PMC8159355; doi:10.1039/d0sc01025a), 2020-05-06
Supplement: SC-011-D0SC01025A-s002.pdf [file SC-011-D0SC01025A-s002.pdf]

## Supporting Information

### Part 2

#### **Synthesis of unstrained Criegee intermediates: inverse $\alpha$ -effect and other protective stereoelectronic forces can stop Baeyer-Villiger rearrangement of $\gamma$ -hydroperoxy- $\gamma$ -peroxylactones**

Vera A. Vil',<sup>[a]</sup> Yana A. Barsegyan,<sup>[a]</sup> Leah Kuhn,<sup>[b]</sup> Maria V. Ekimova,<sup>[a],[c]</sup> Egor A. Semenov,<sup>[a],[c]</sup> Alexander A. Korlyukov,<sup>[d],[e]</sup> Alexander O. Terent'ev, \*<sup>[a],[c]</sup> Igor Alabugin \*<sup>[b]</sup>

[a] N. D. Zelinsky Institute of Organic Chemistry Russian Academy of Sciences, 47 Leninsky Prospect, Moscow, 119991, Russian Federation.

[b] Department of Chemistry and Biochemistry Florida State University, Tallahassee, 32309, USA.

[c] D. I. Mendeleev University of Chemical Technology of Russia, 9 Miuskaya Square, Moscow 125047, Russian Federation.

[d] A. N. Nesmeyanov Institute of Organoelement Compounds Russian Academy of Sciences, 28 Vavilov Street, Moscow, 119991, Russian Federation.

[e] Pirogov Russian National Research Medical University, Moscow, 117997, Russian Federation.

#### **Table of content**

|                                                                                                 |      |
|-------------------------------------------------------------------------------------------------|------|
| NMR of $\gamma$ -hydroperoxy- $\gamma$ -peroxylactones <b>2</b> and other products .....        | S2   |
| HRMS data of $\gamma$ -hydroperoxy- $\gamma$ -peroxylactones <b>2</b> and other products .....  | S177 |
| IR spectra of $\gamma$ -hydroperoxy- $\gamma$ -peroxylactones <b>2</b> and other products ..... | S193 |

NMR of  $\gamma$ -hydroperoxy- $\gamma$ -peroxylactones 2 and other products  
5-Benzyl-6-hydroperoxy-6-methyl-1,2-dioxan-3-one, 2a

$^1\text{H}$  NMR

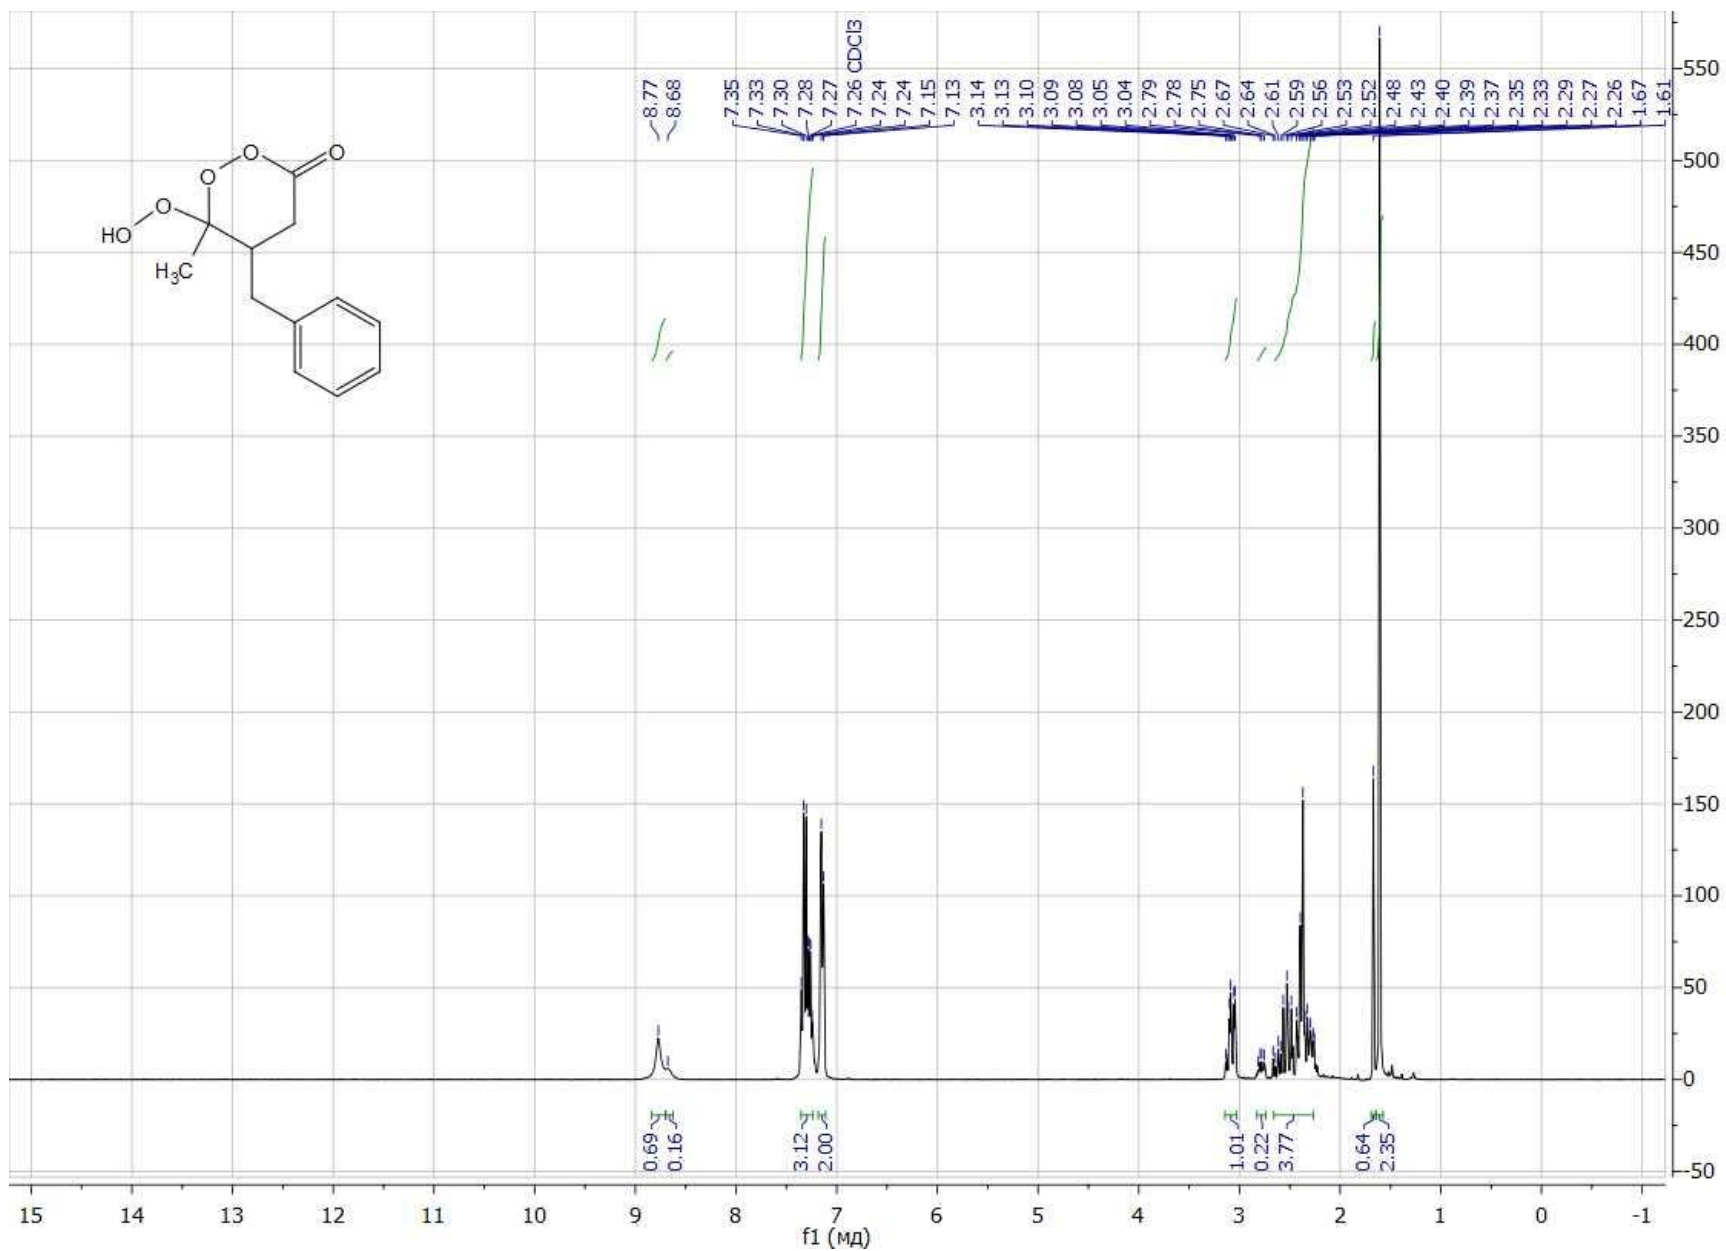

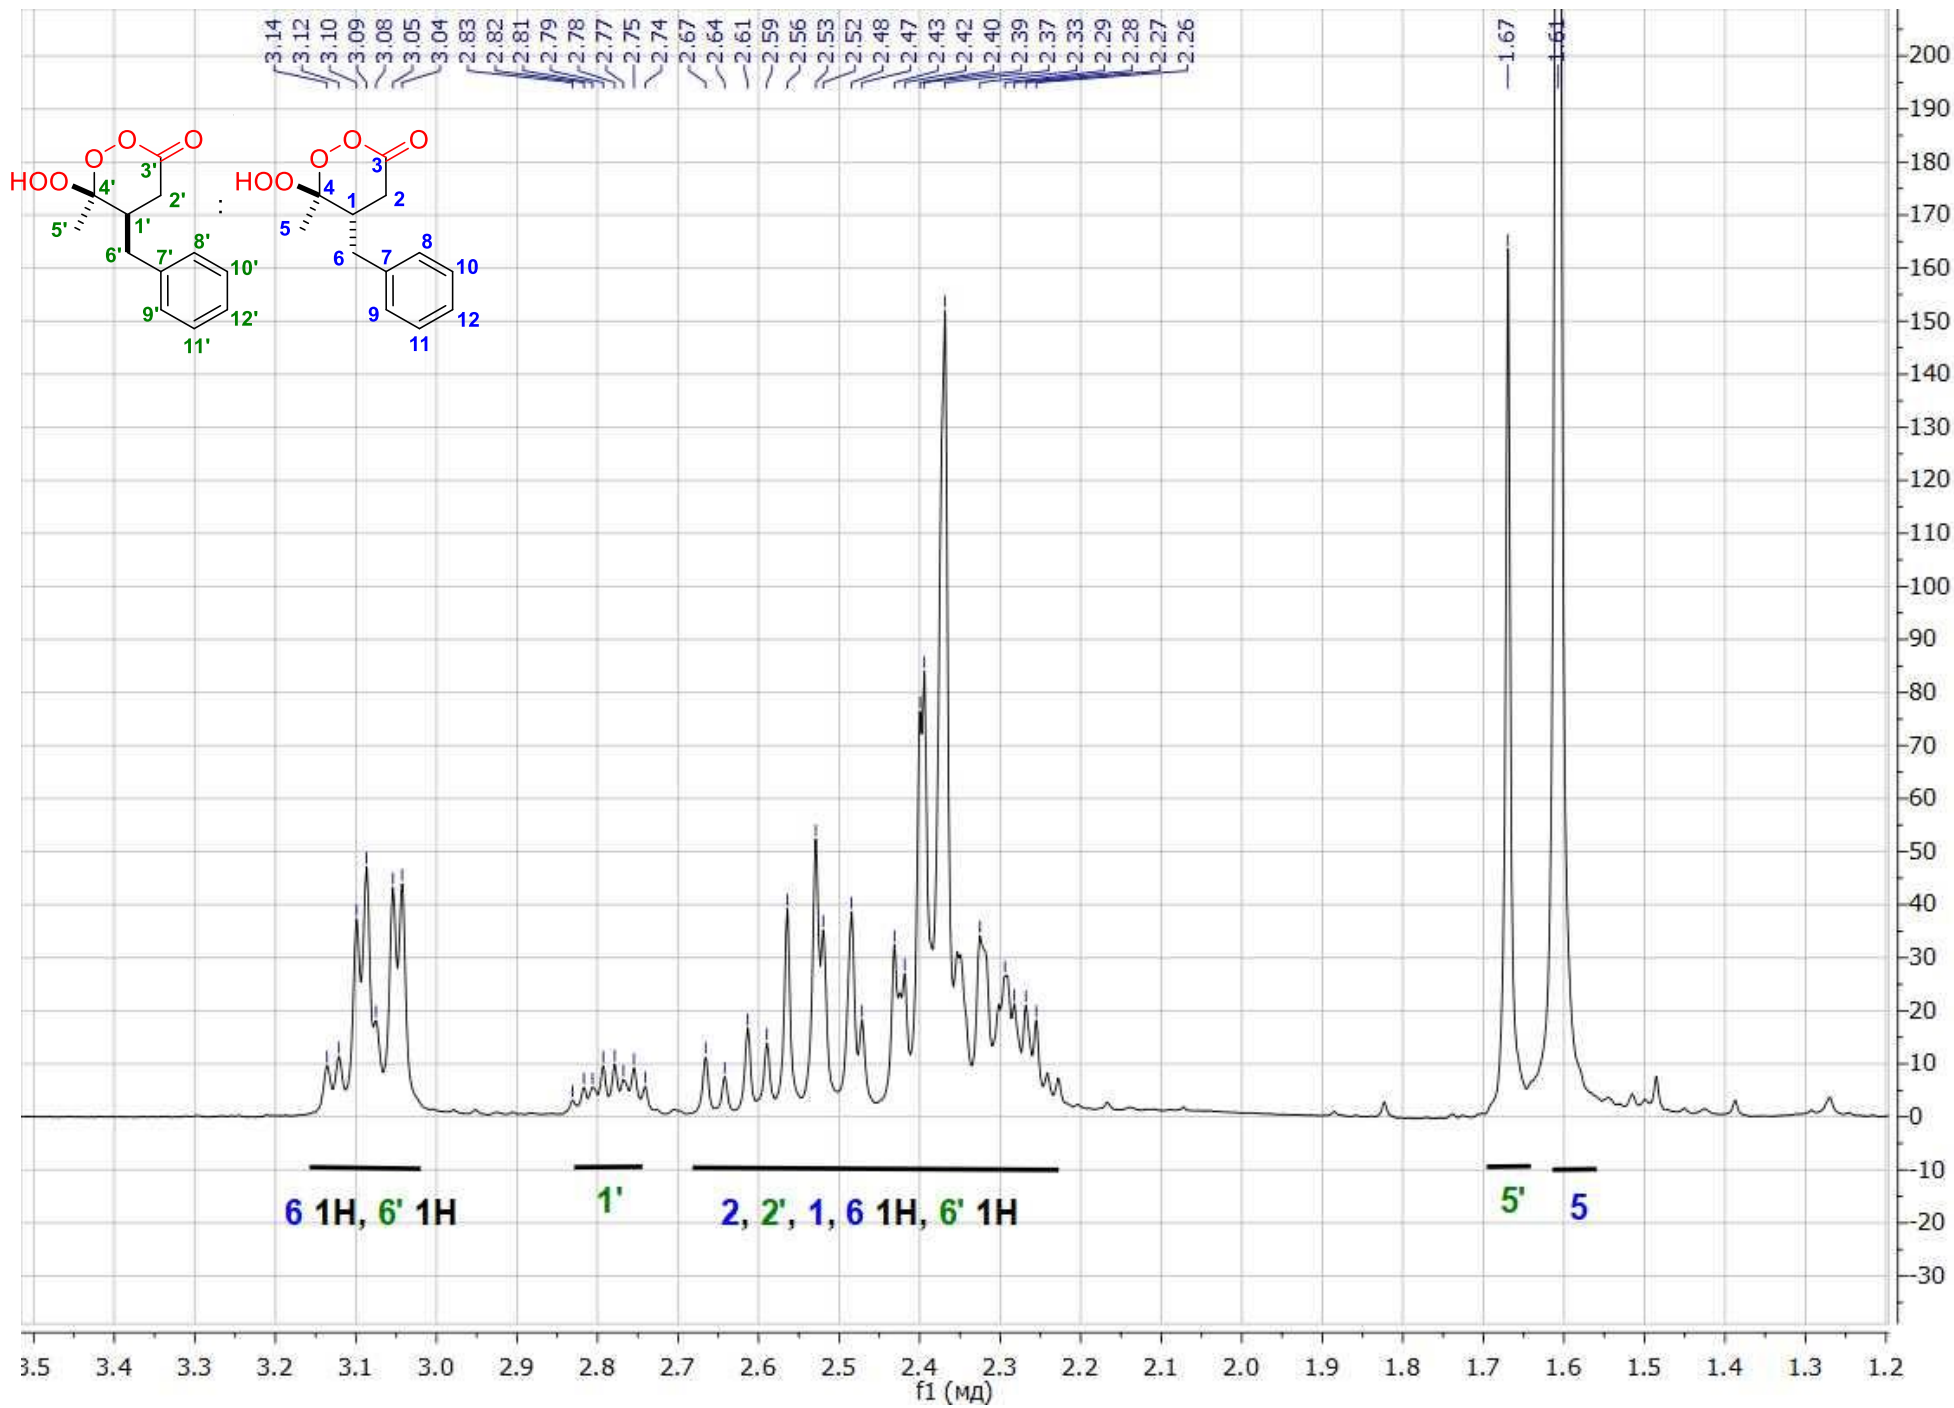

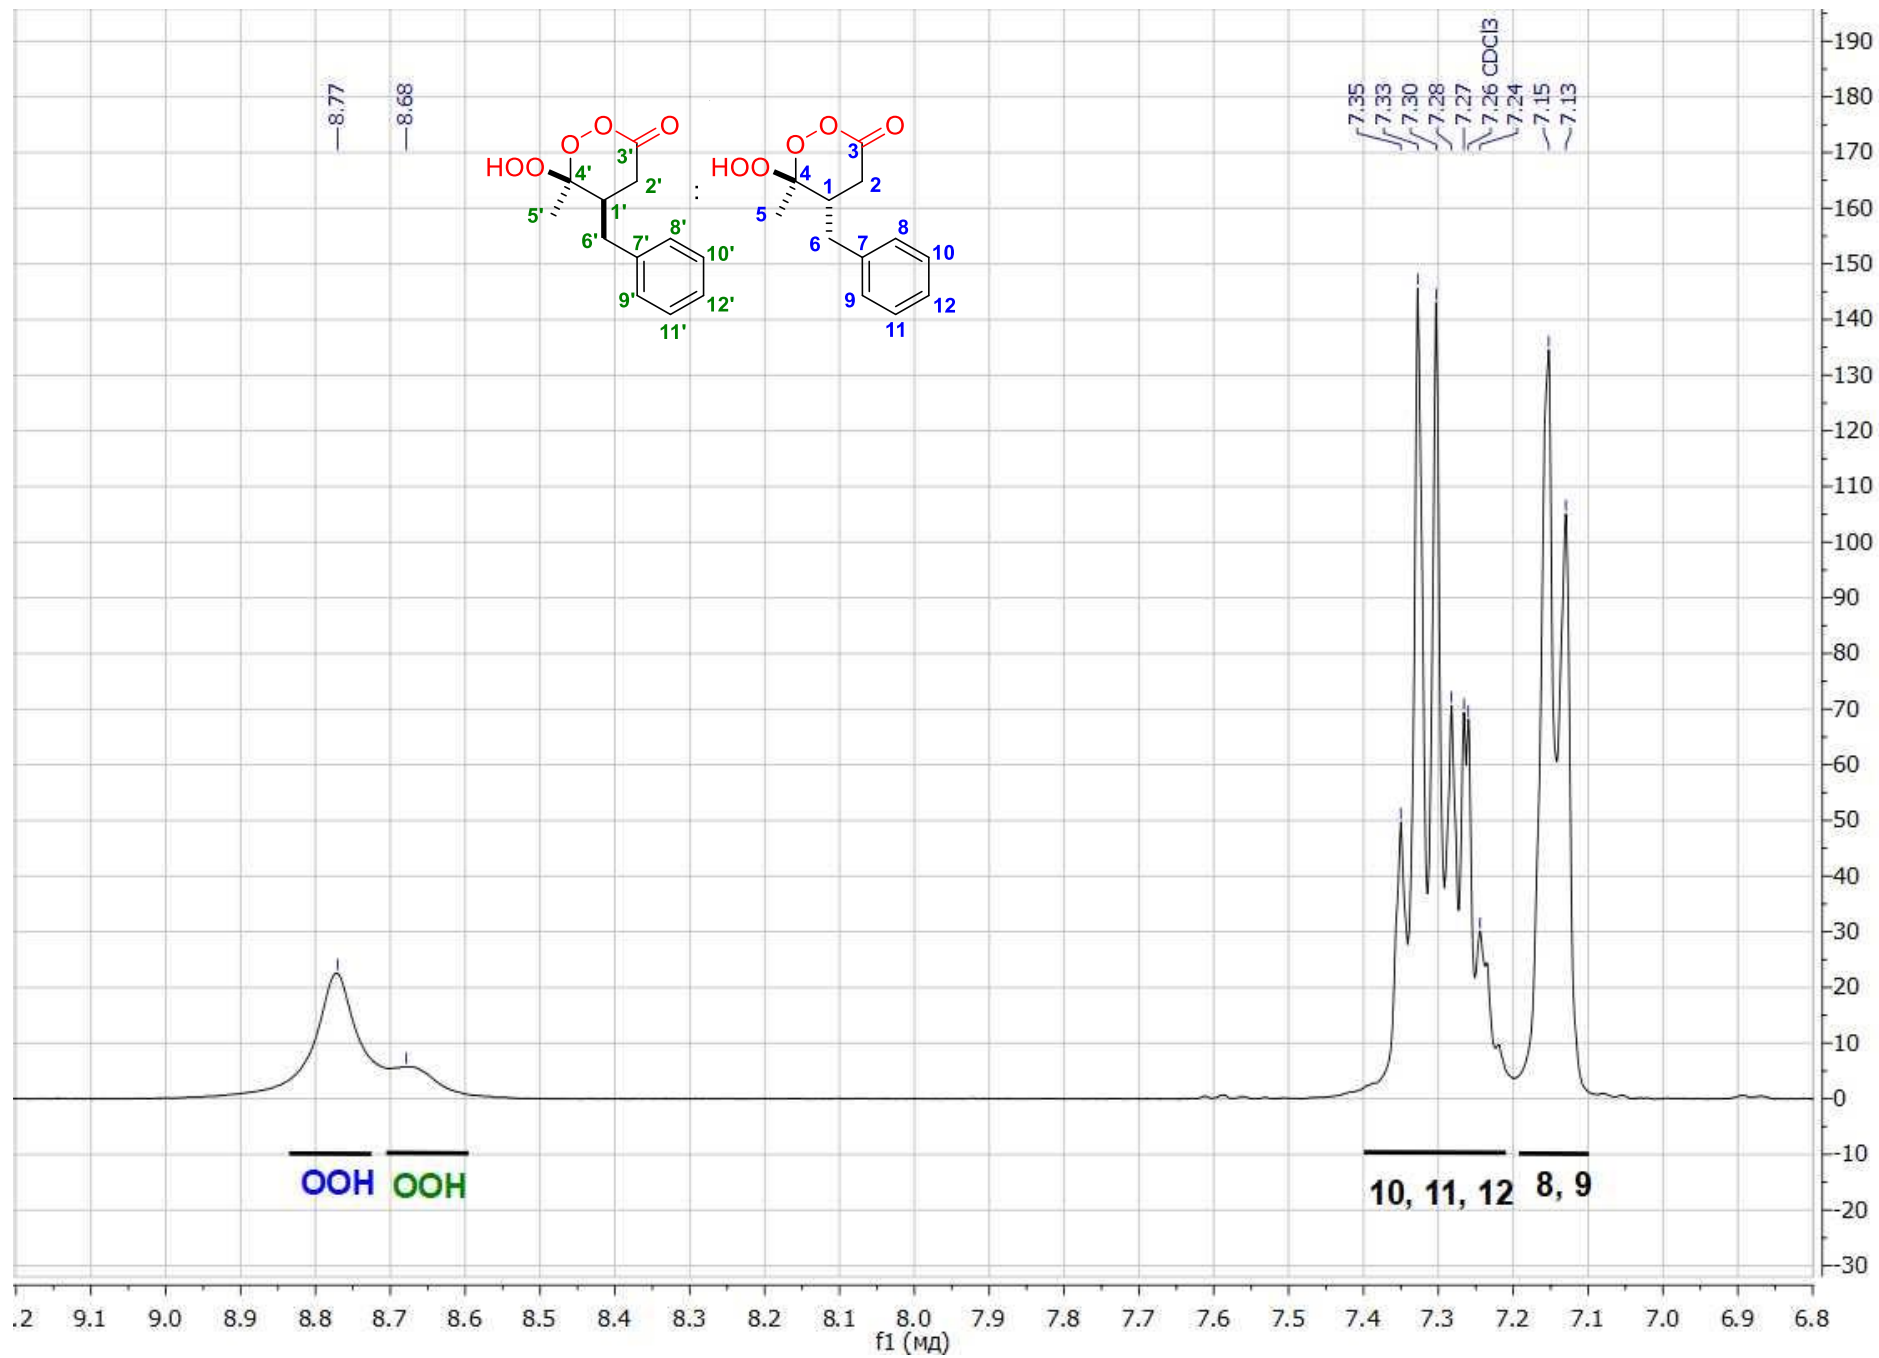

# <sup>13</sup>C NMR

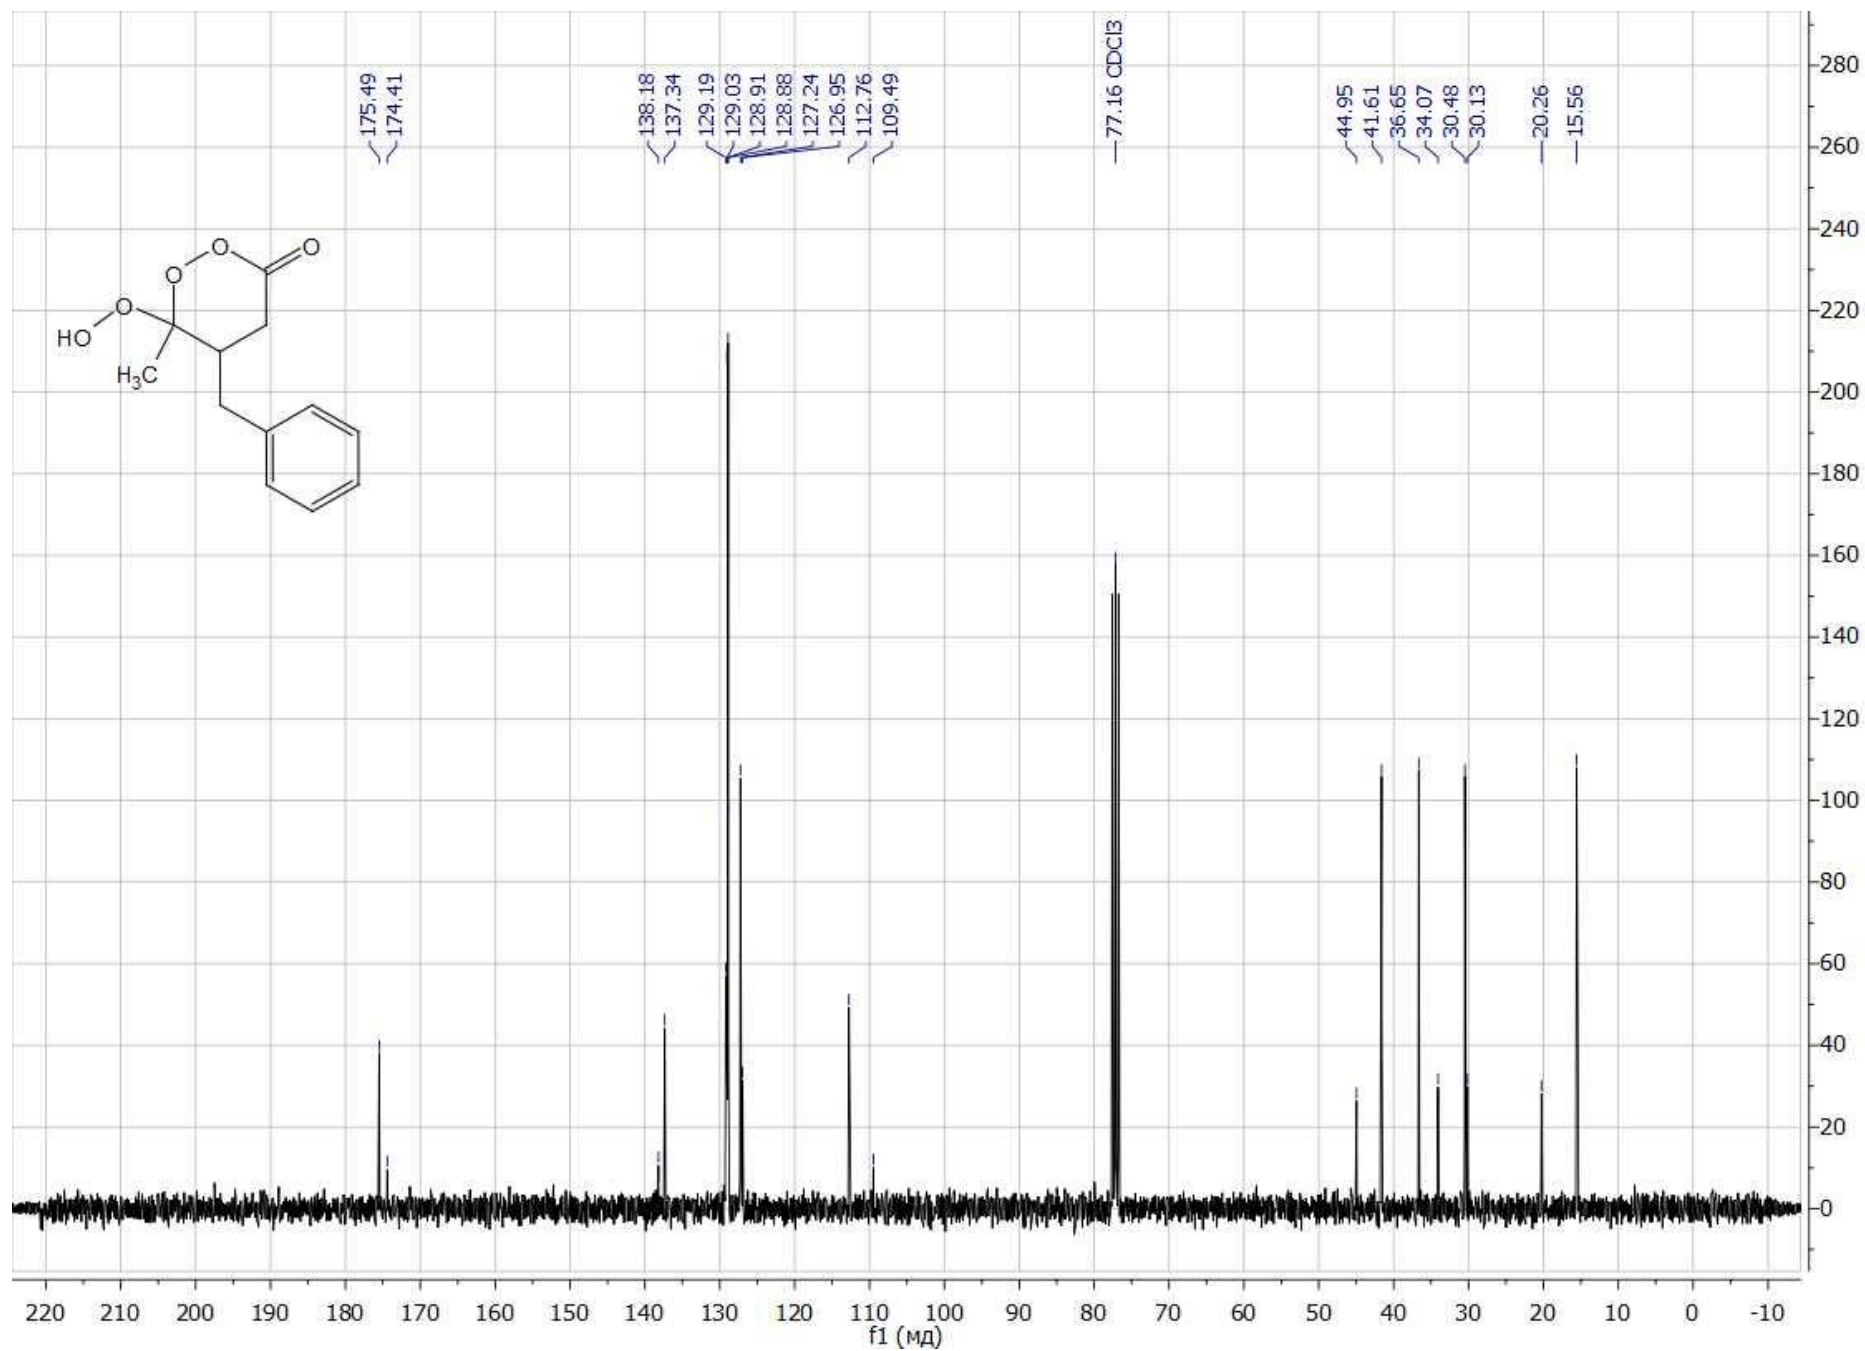

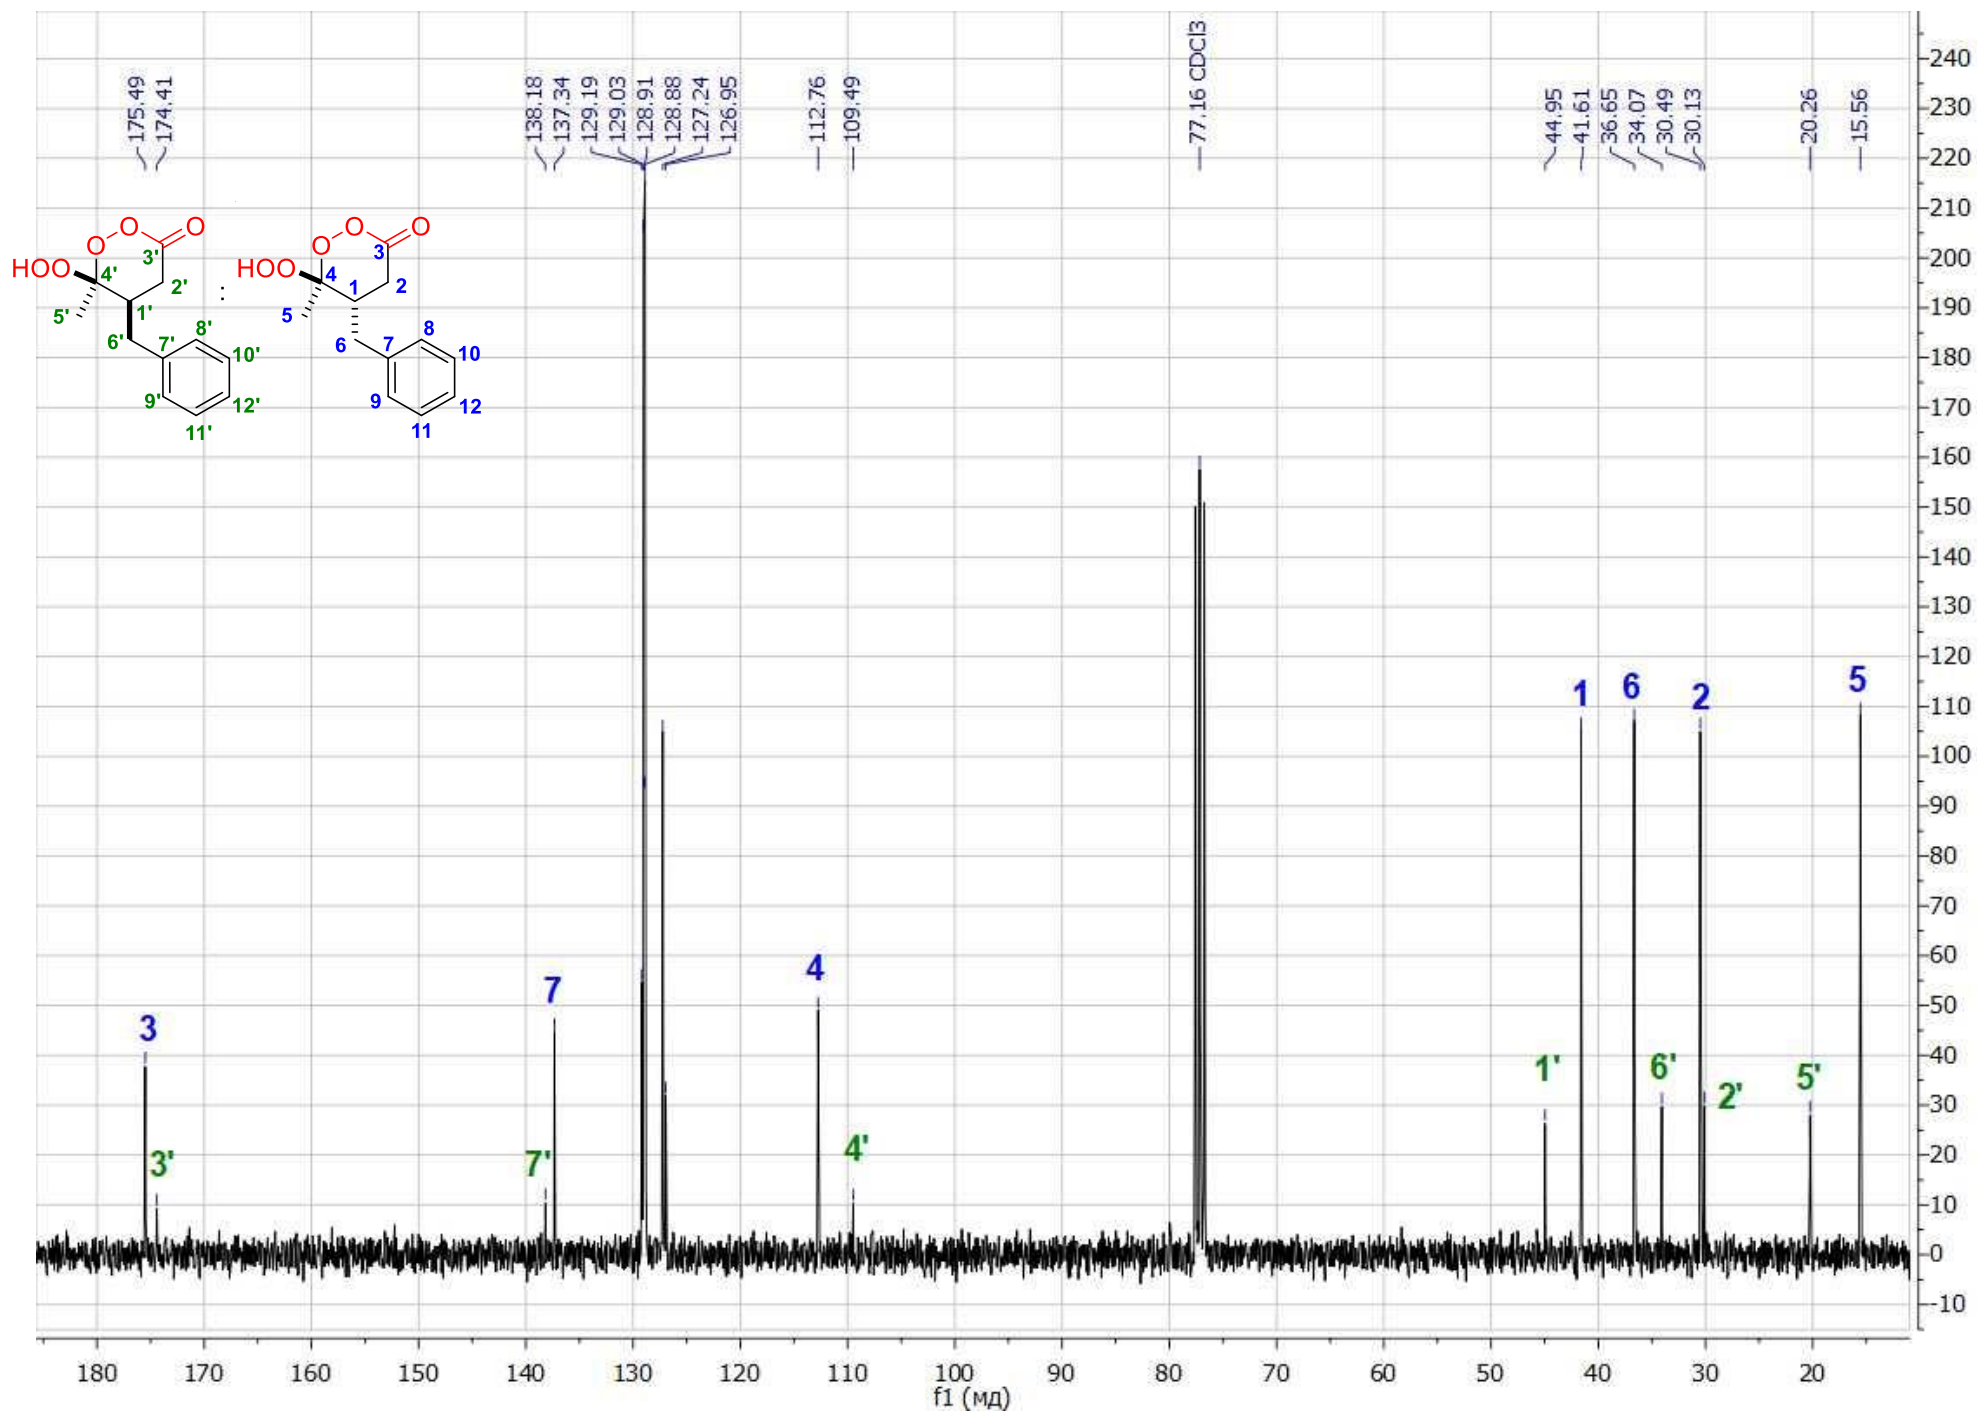

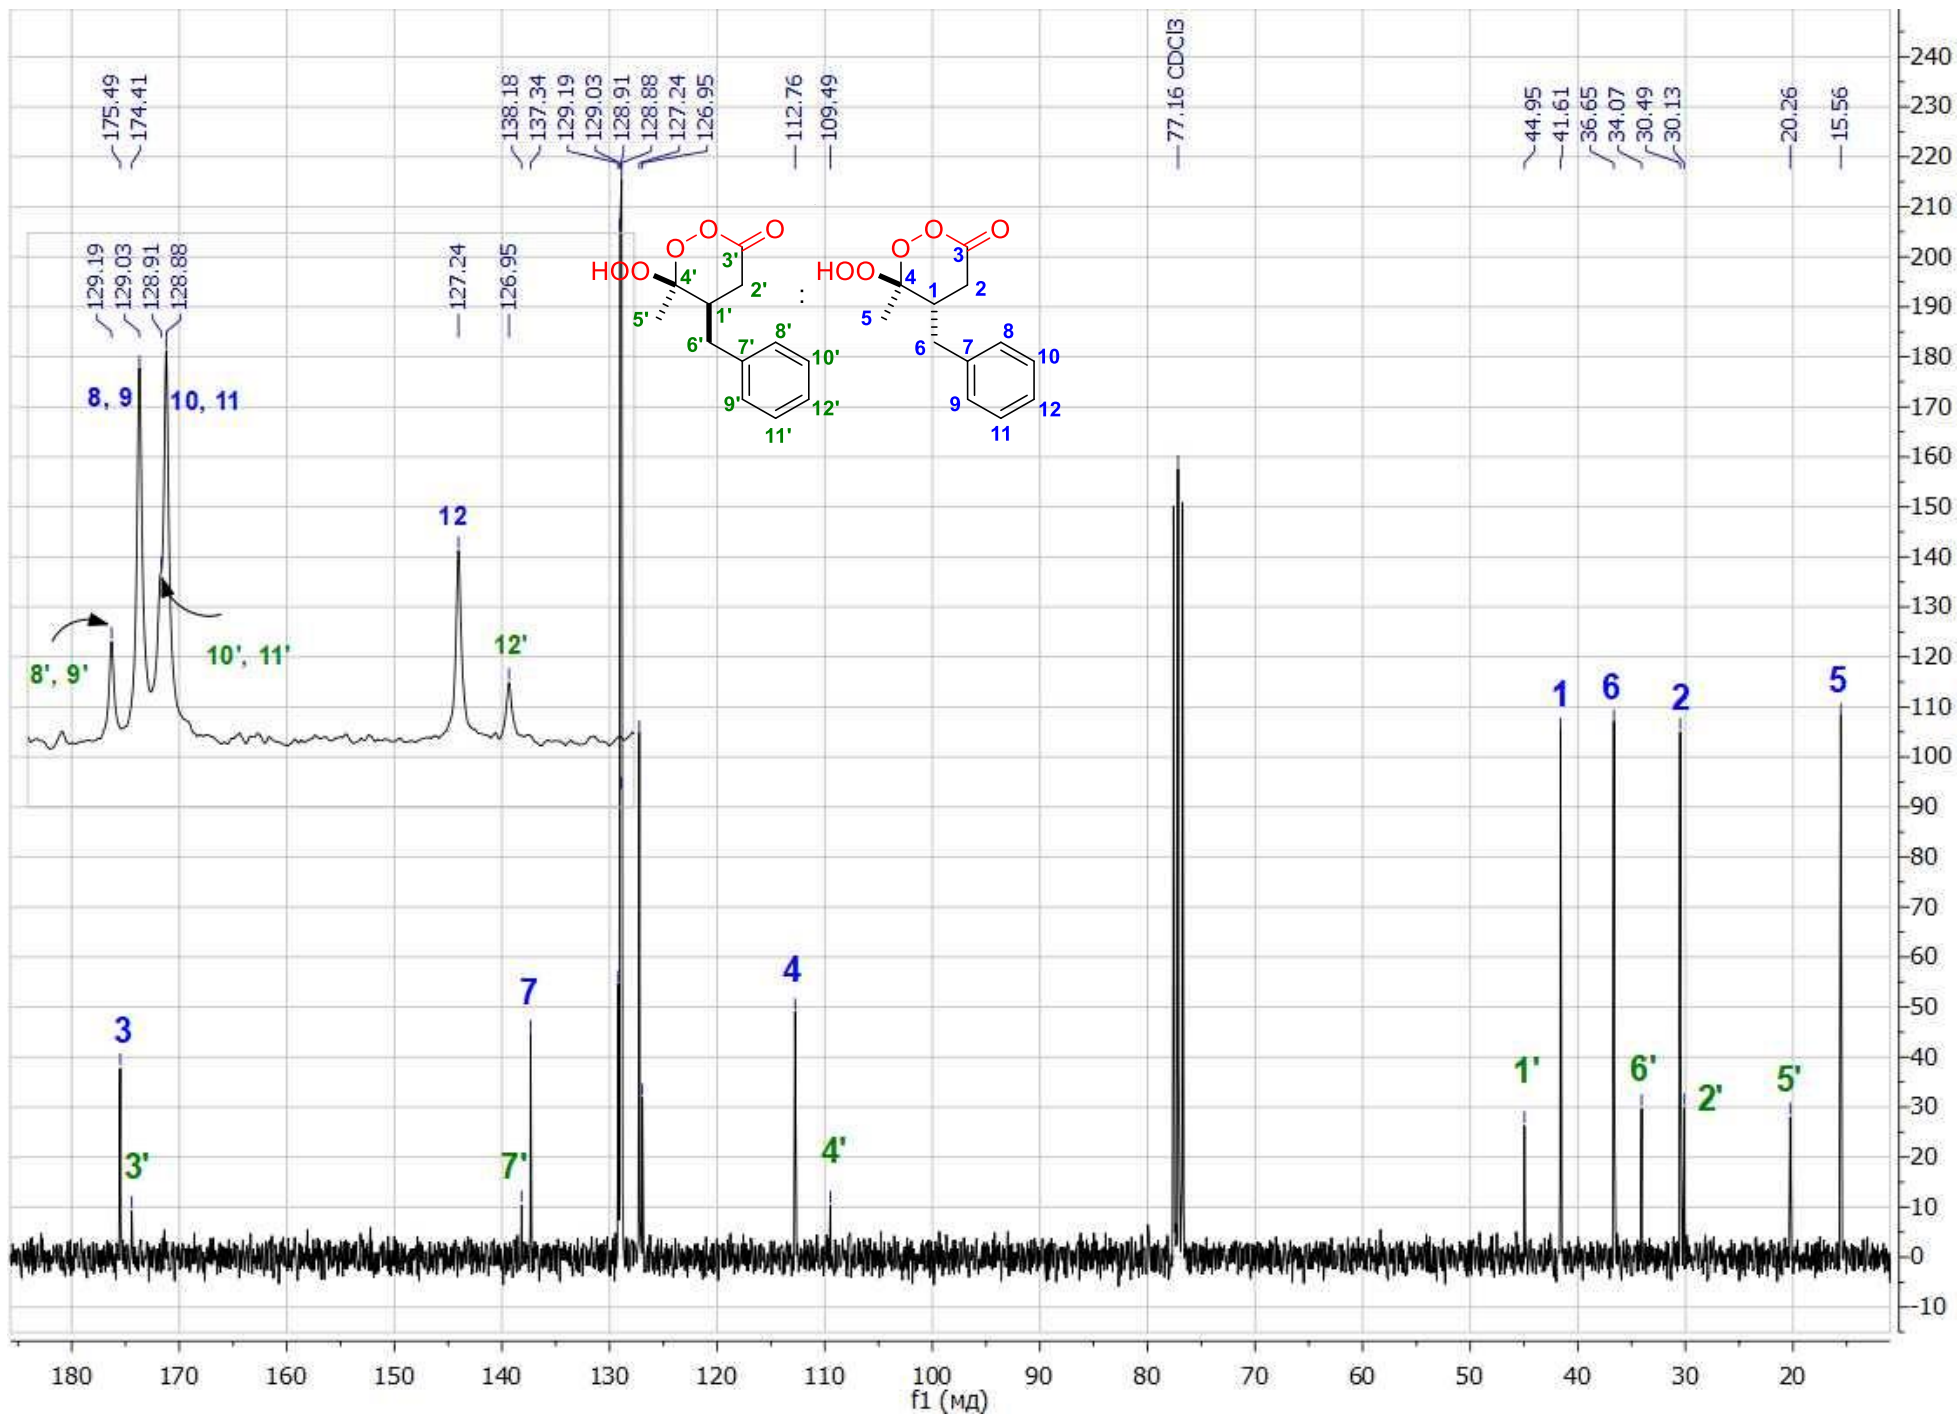

<sup>13</sup>C\_deptsp135

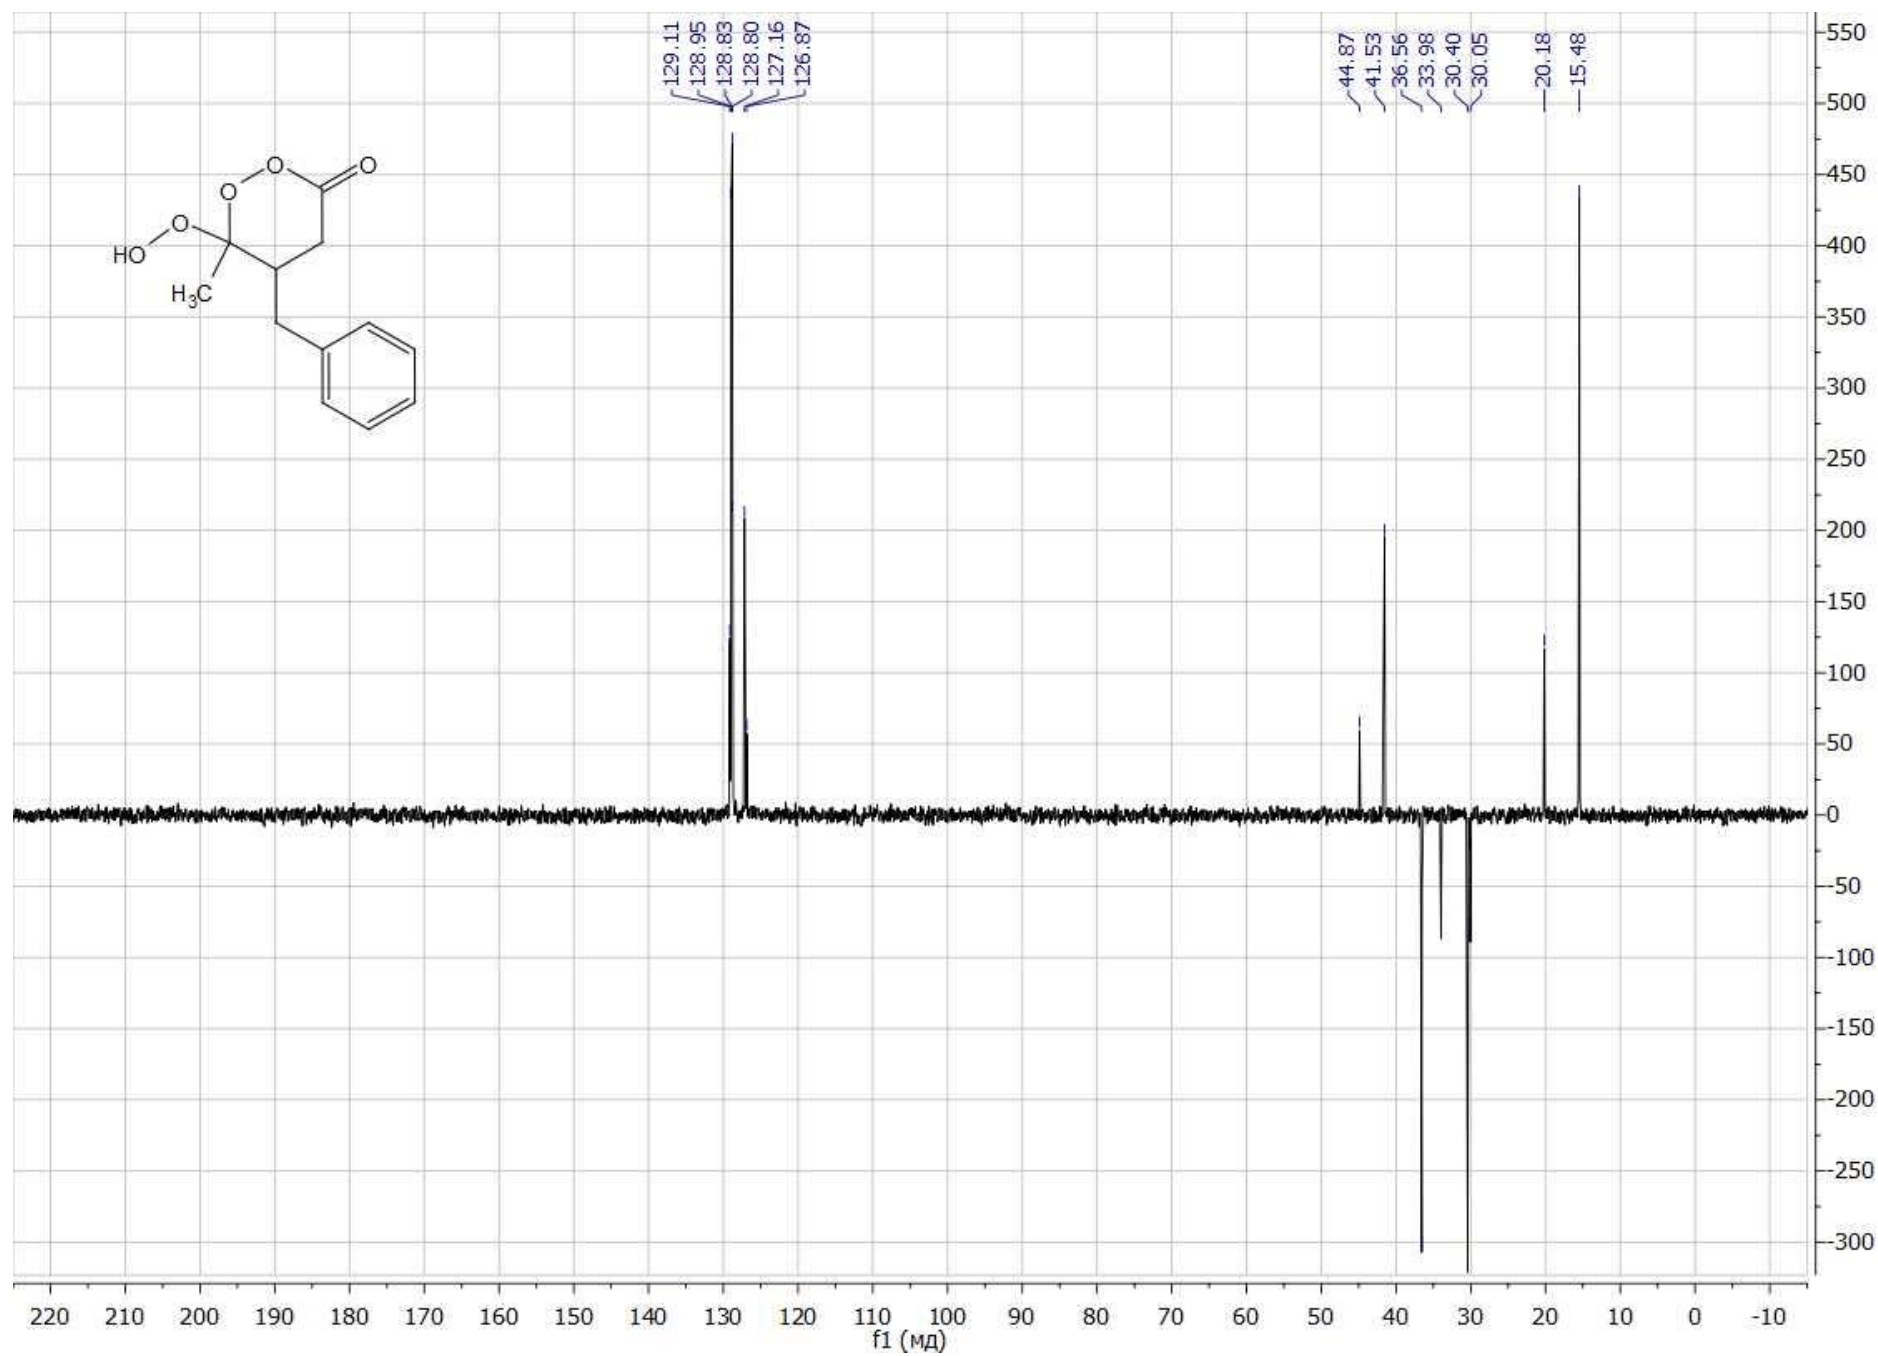



{<sup>1</sup>H-<sup>1</sup>H} COSY

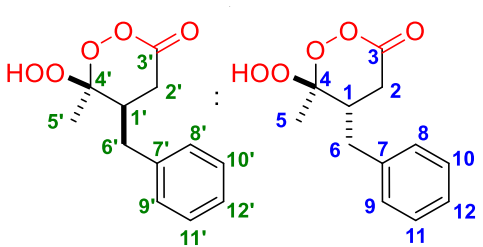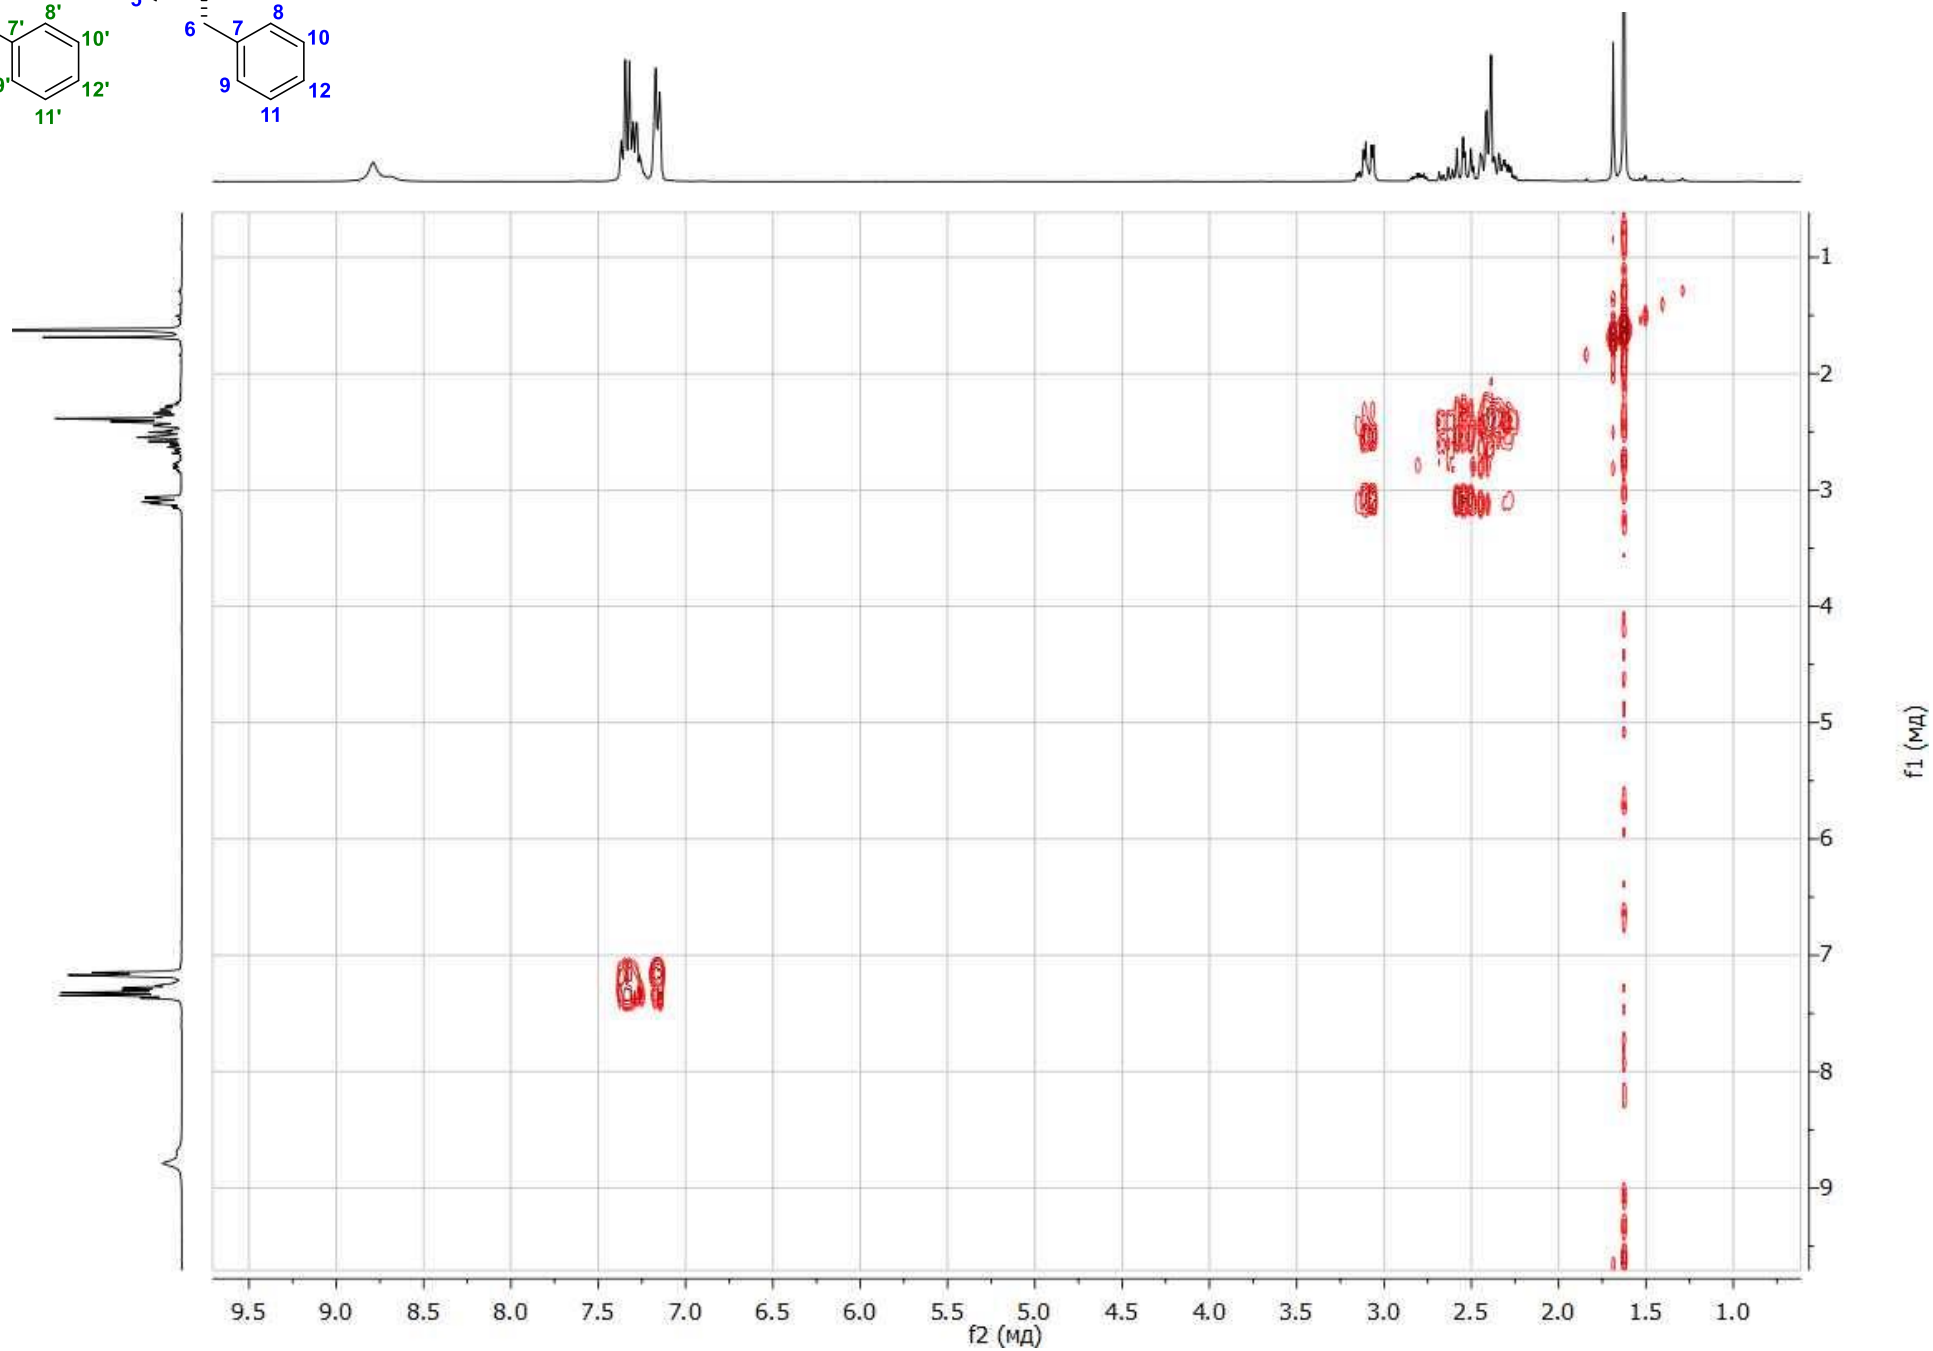

{<sup>1</sup>H-<sup>1</sup>H} NOESY

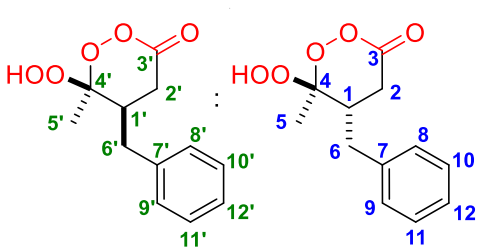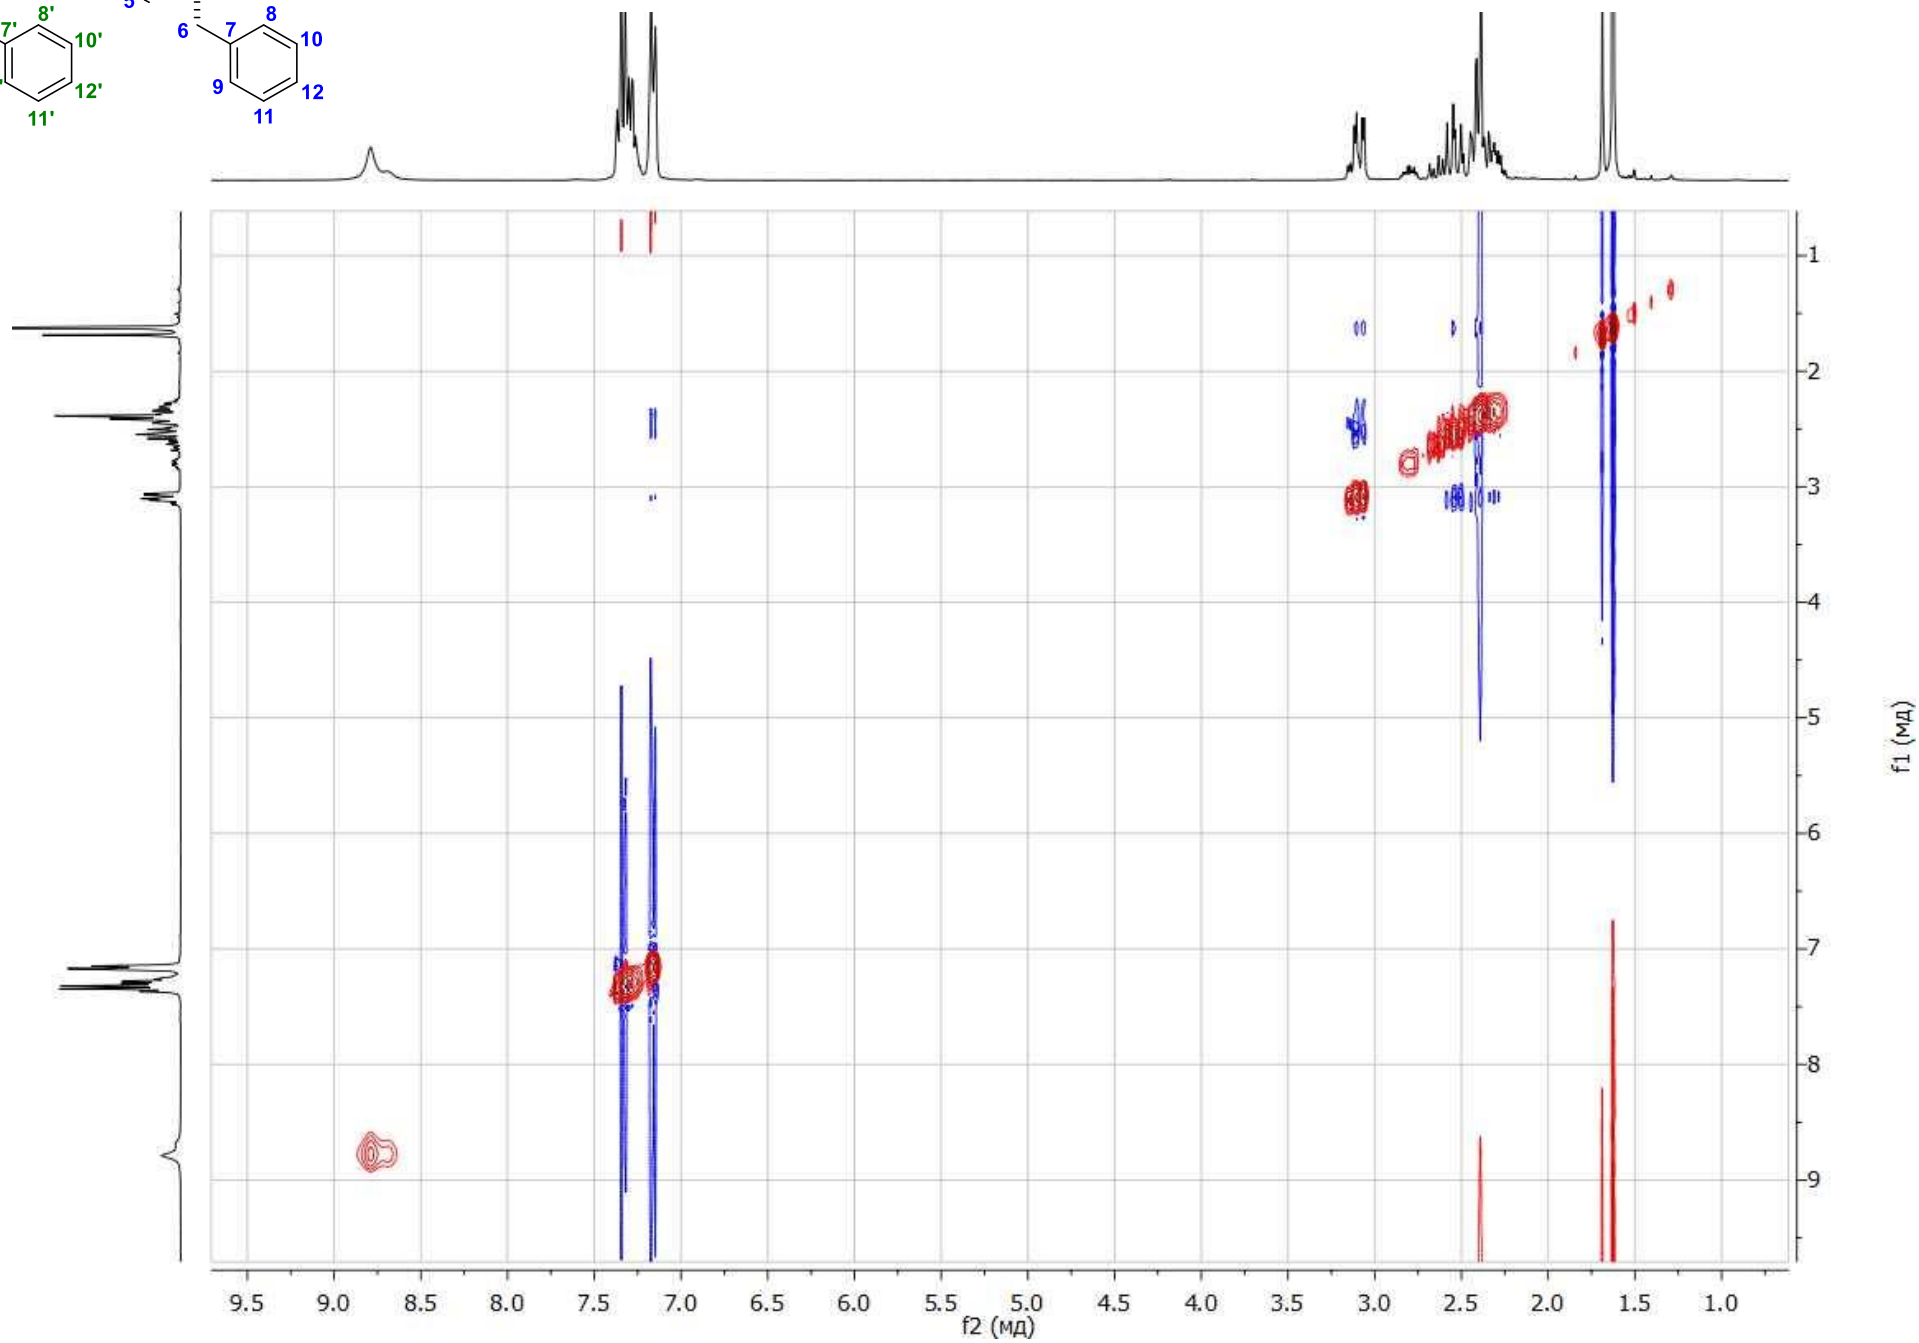

6' 1H, 6 1H

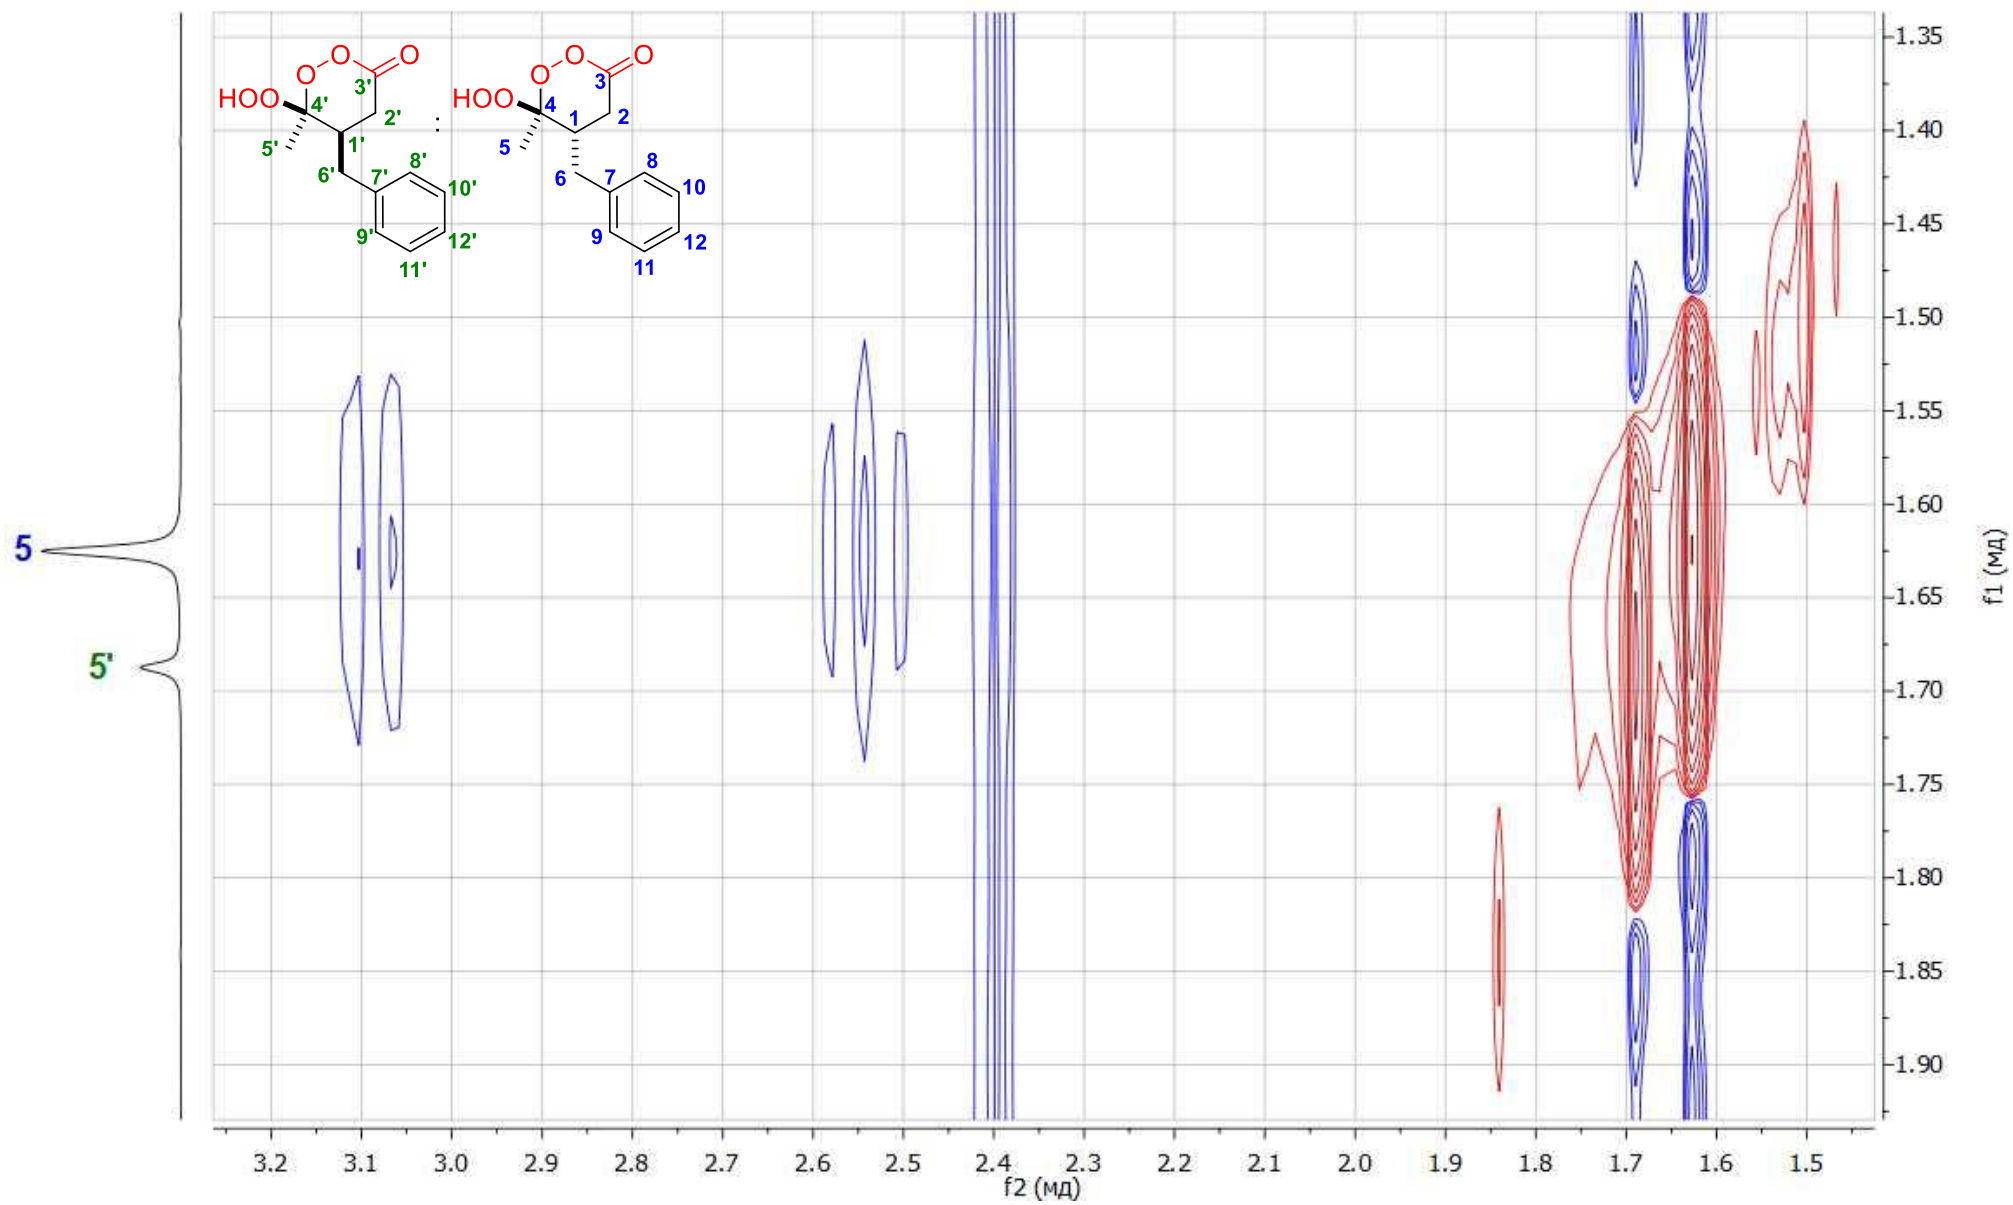

{<sup>1</sup>H-<sup>13</sup>C} HSQC

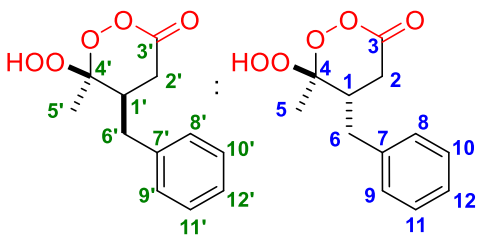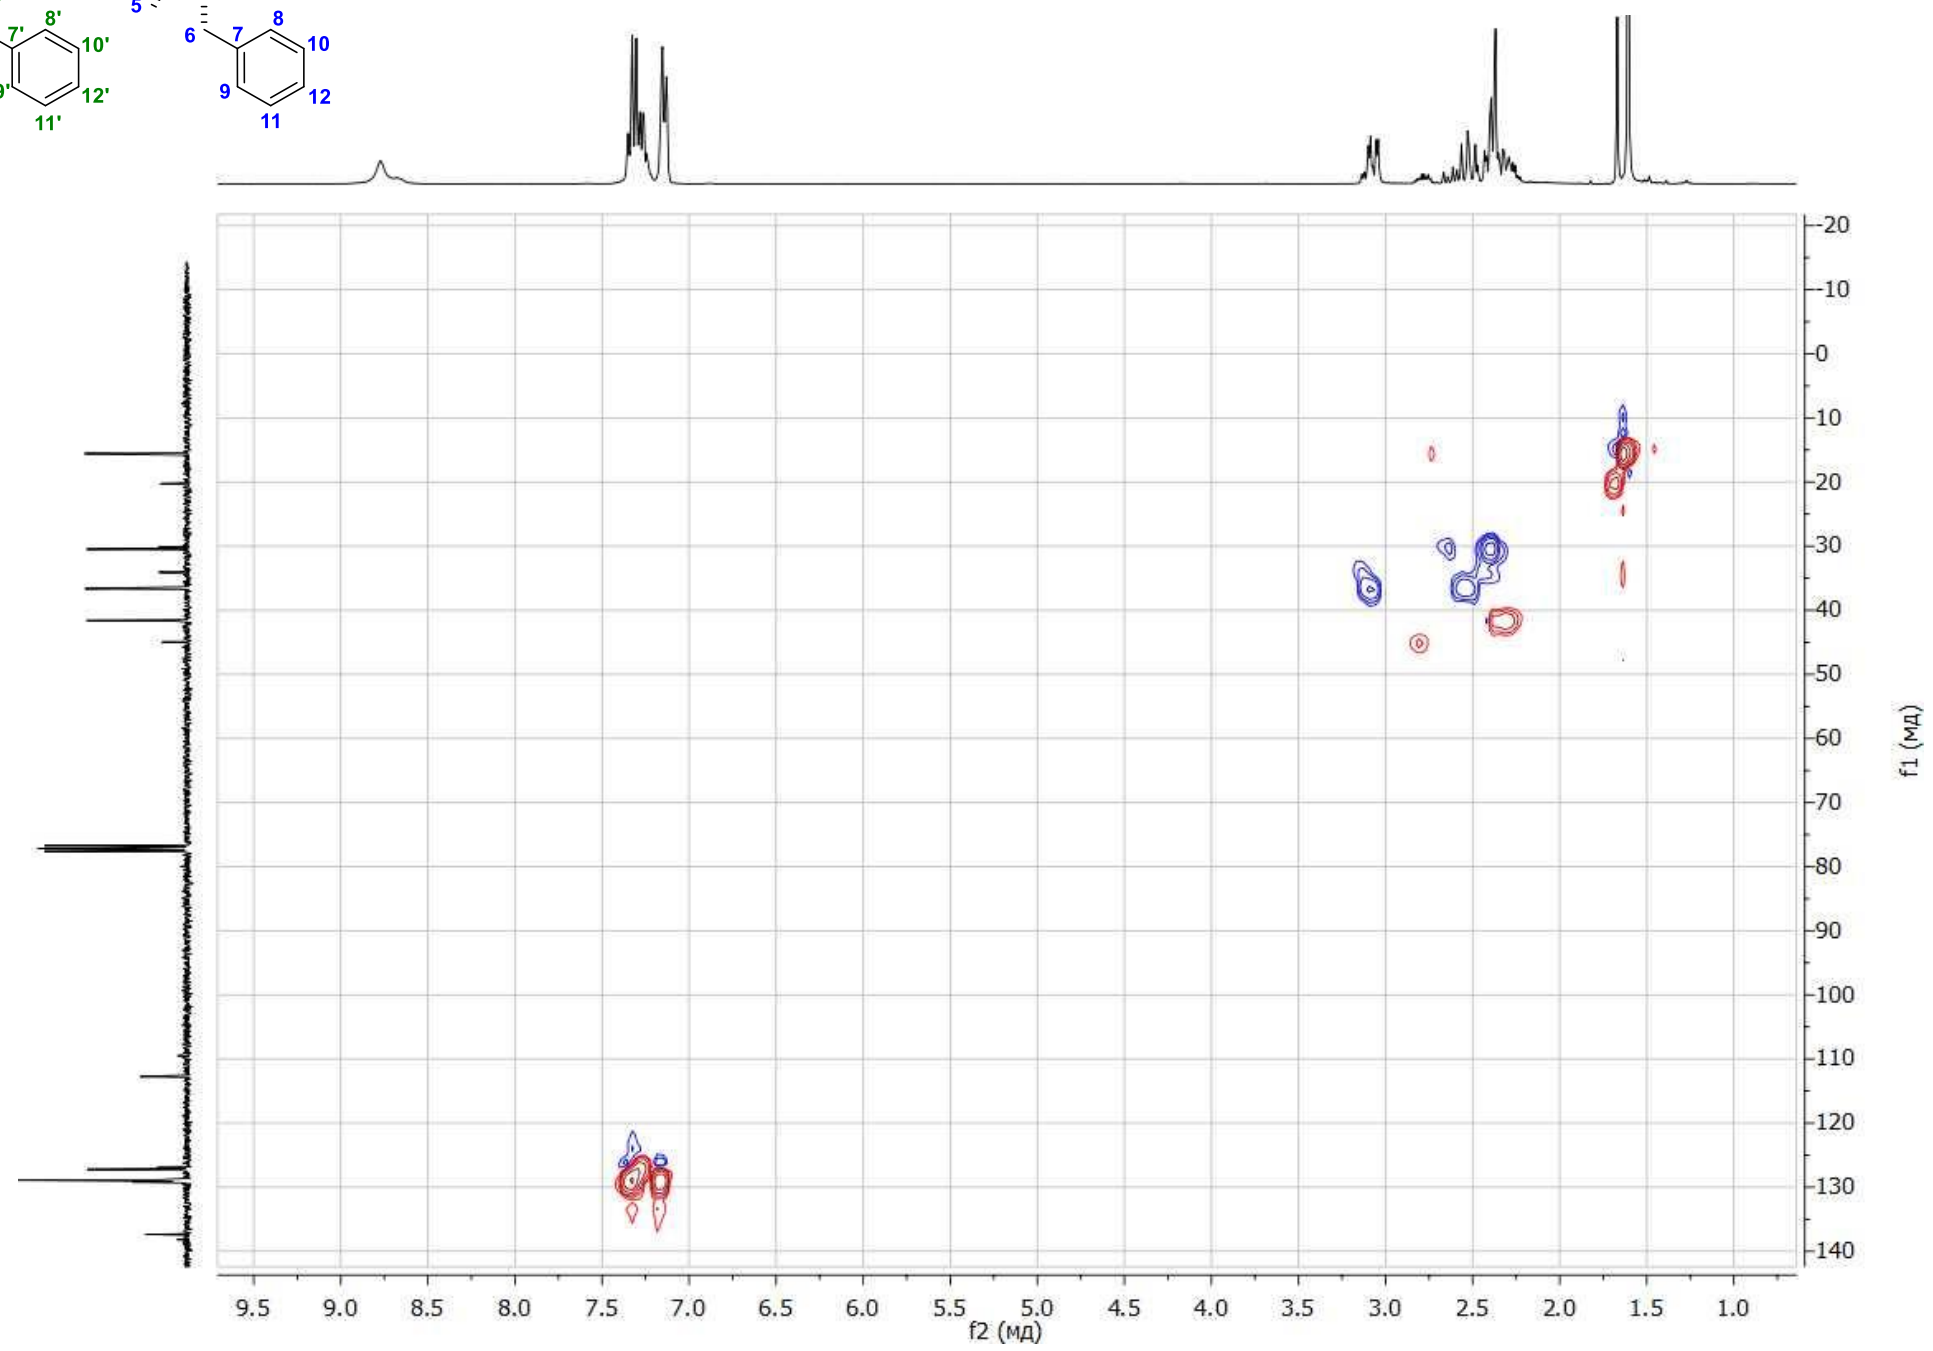

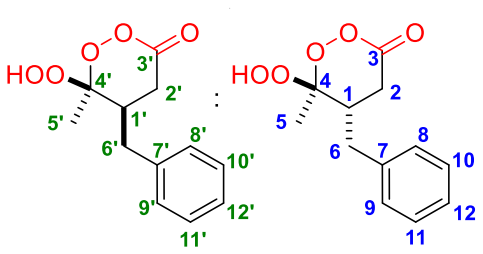

{<sup>1</sup>H-<sup>13</sup>C} HMBC

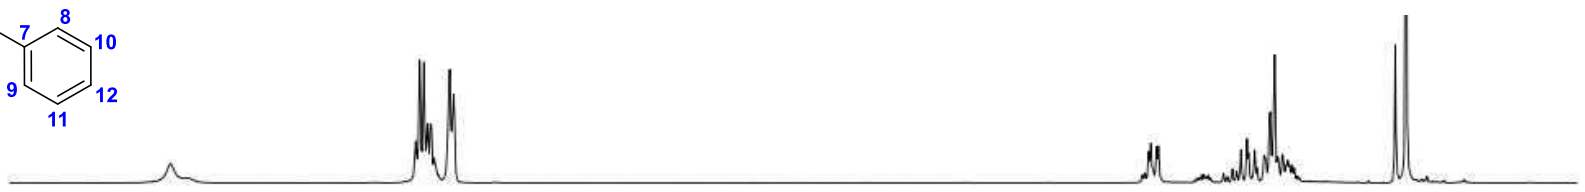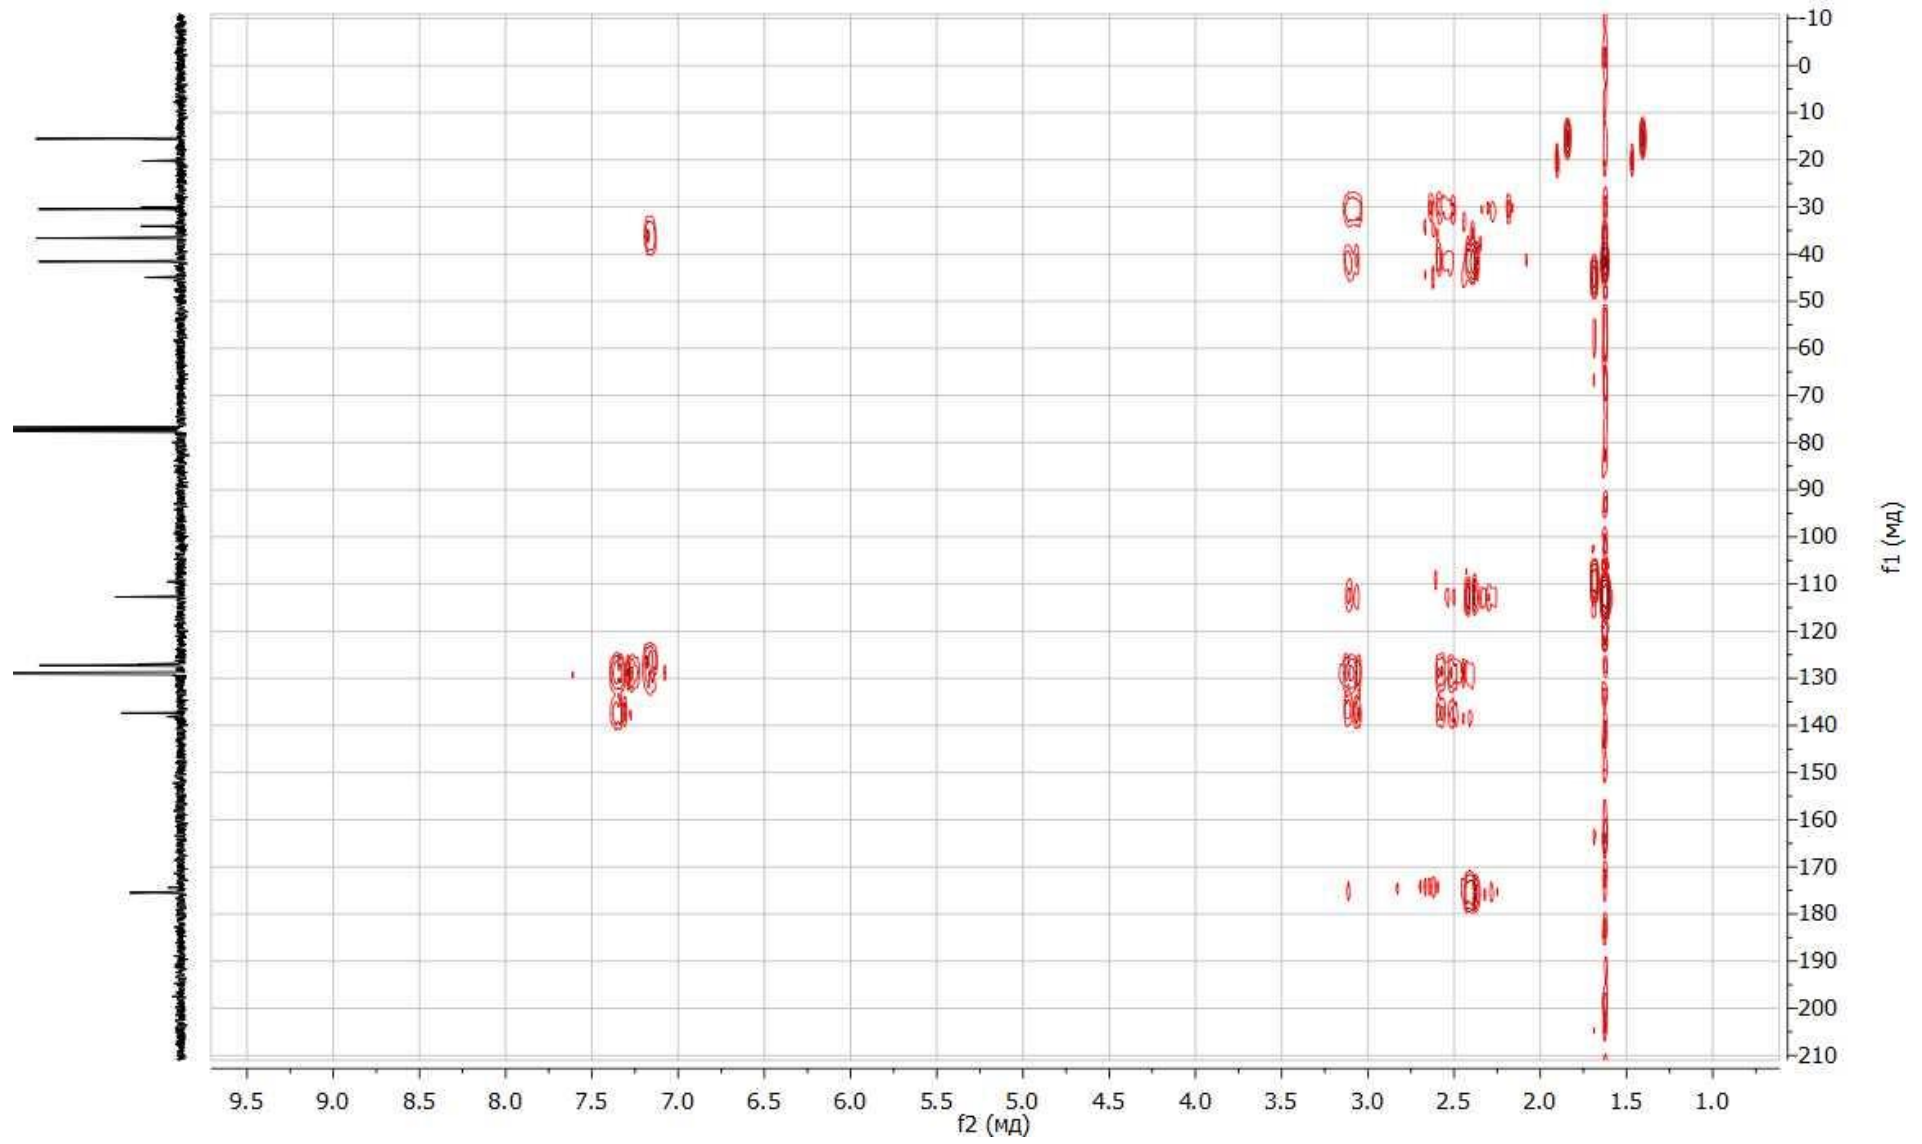

6-Hydroperoxy-6-methyl-5-(4-nitrobenzyl)-1,2-dioxan-3-one, 2b

<sup>1</sup>H NMR

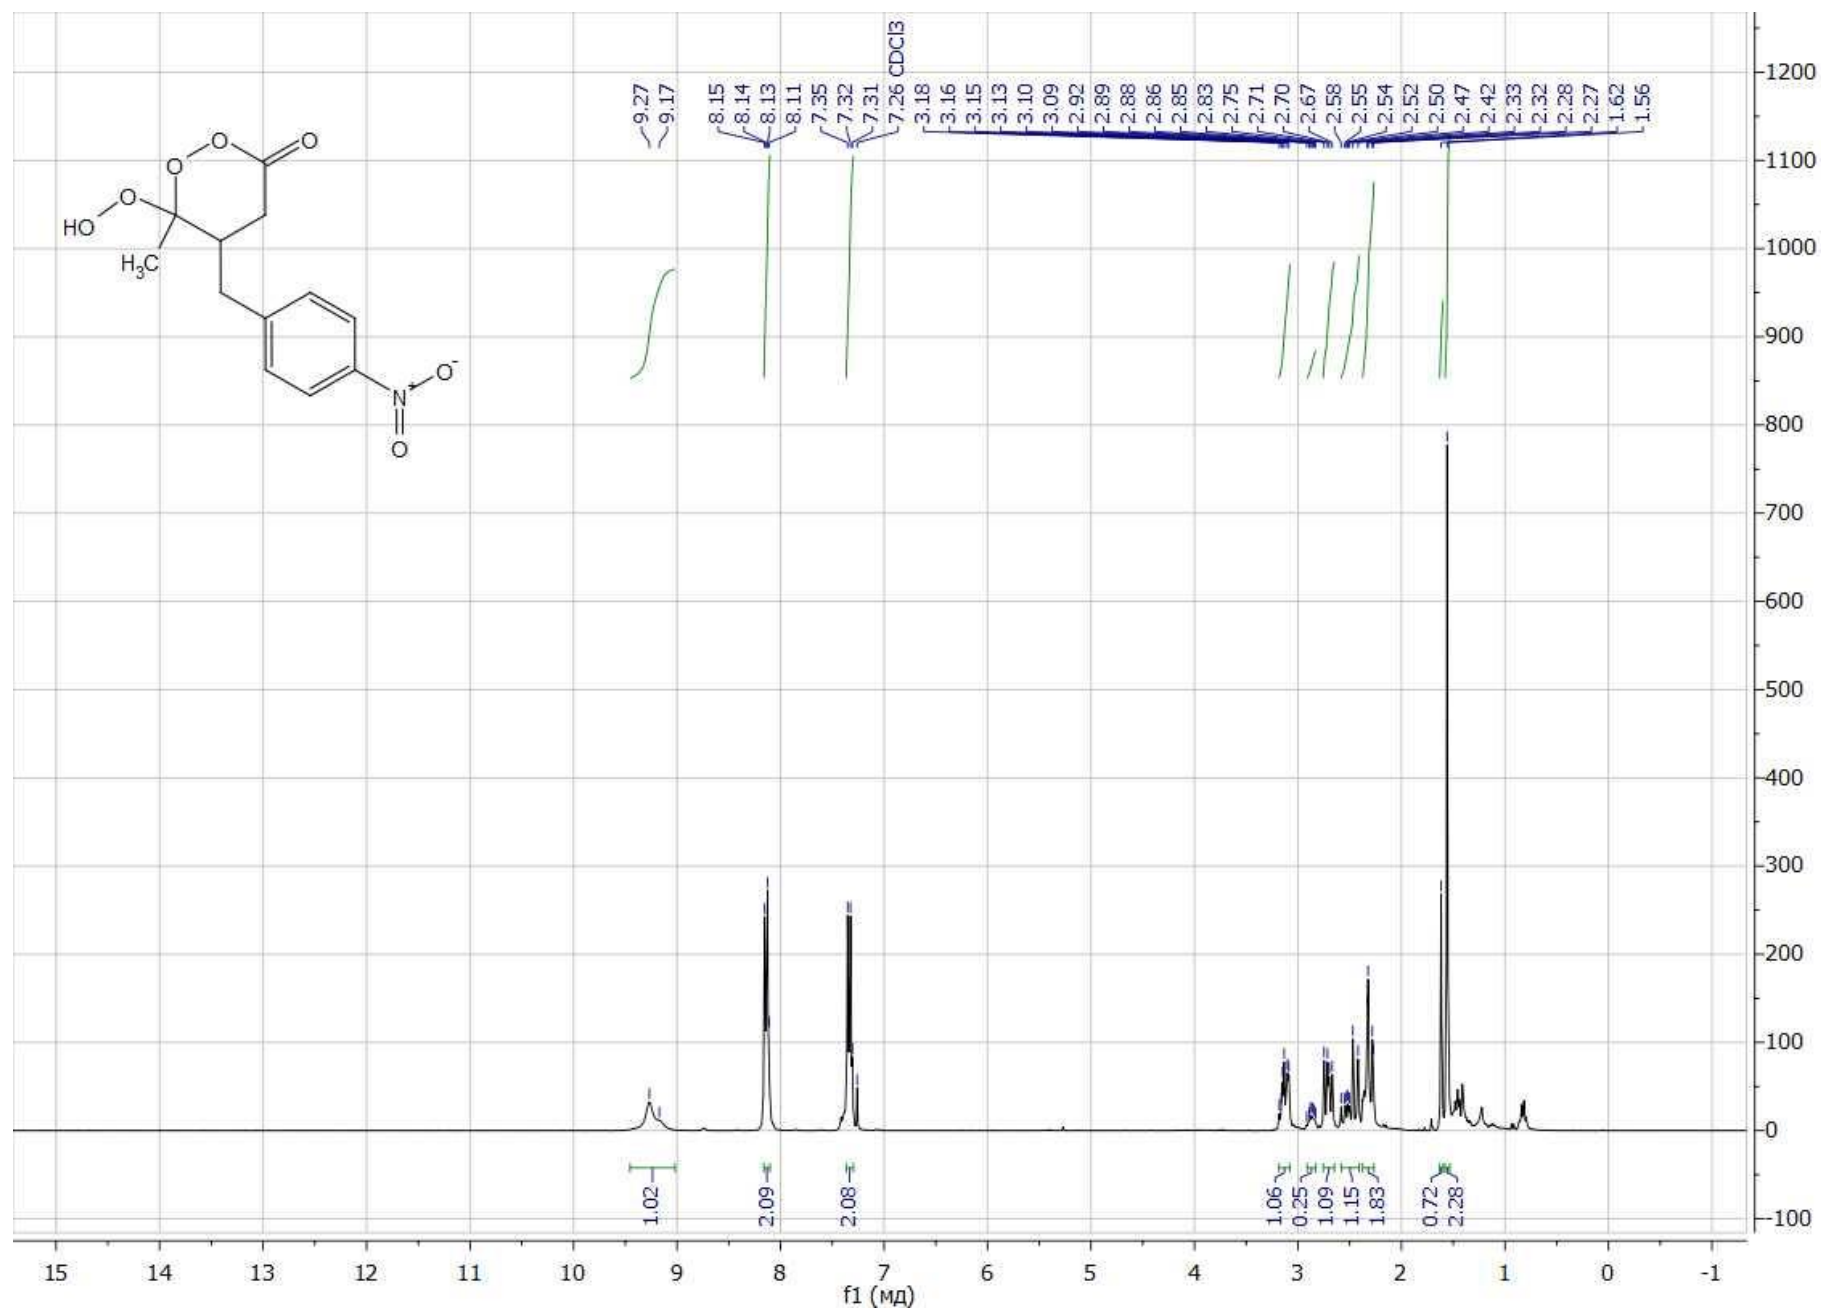

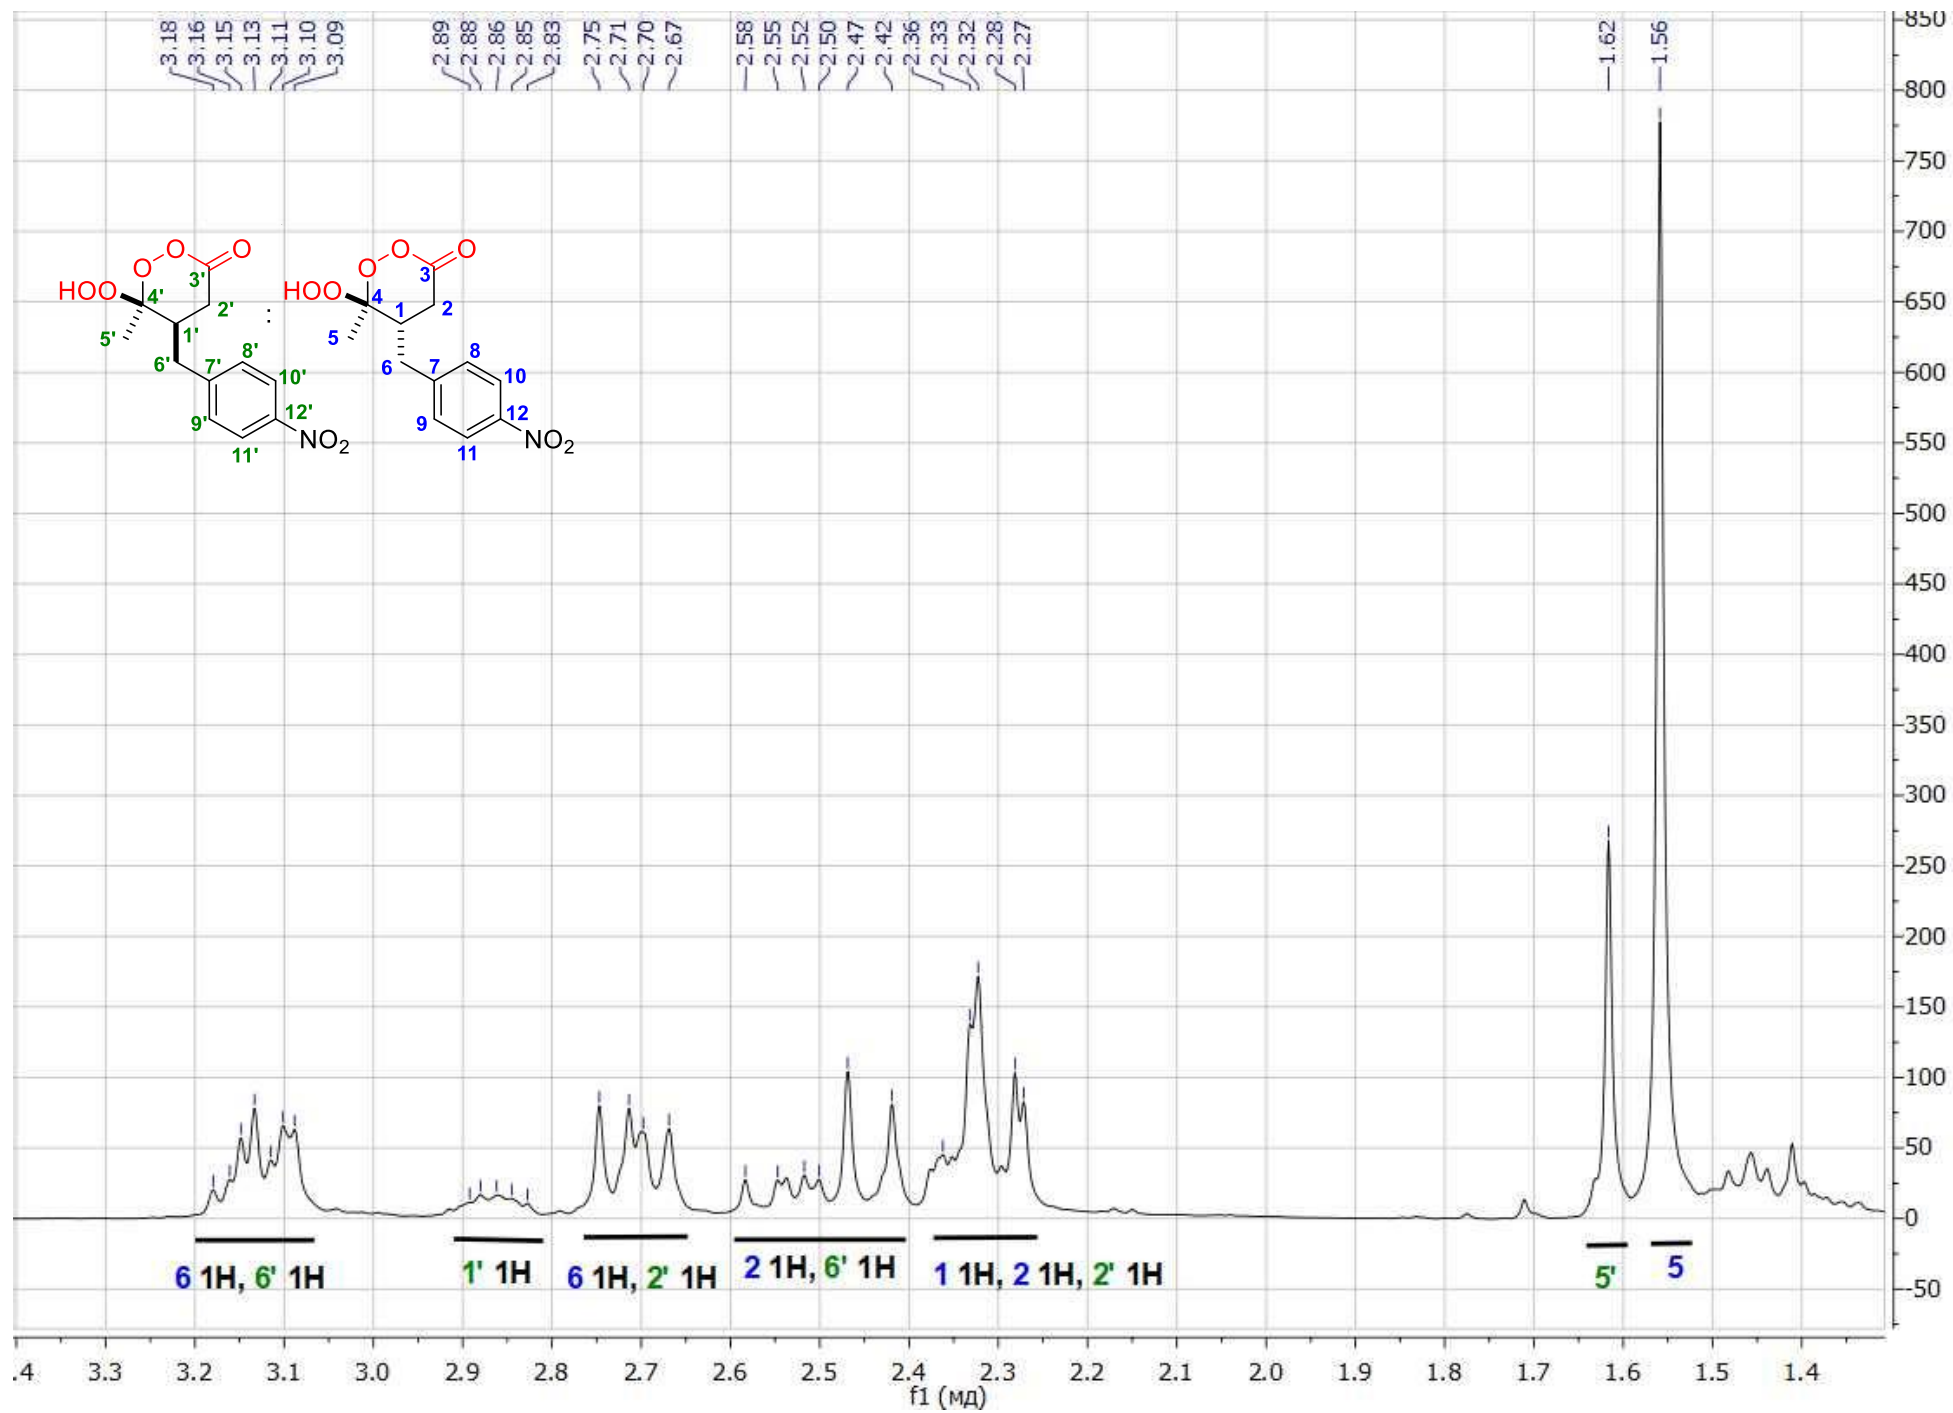

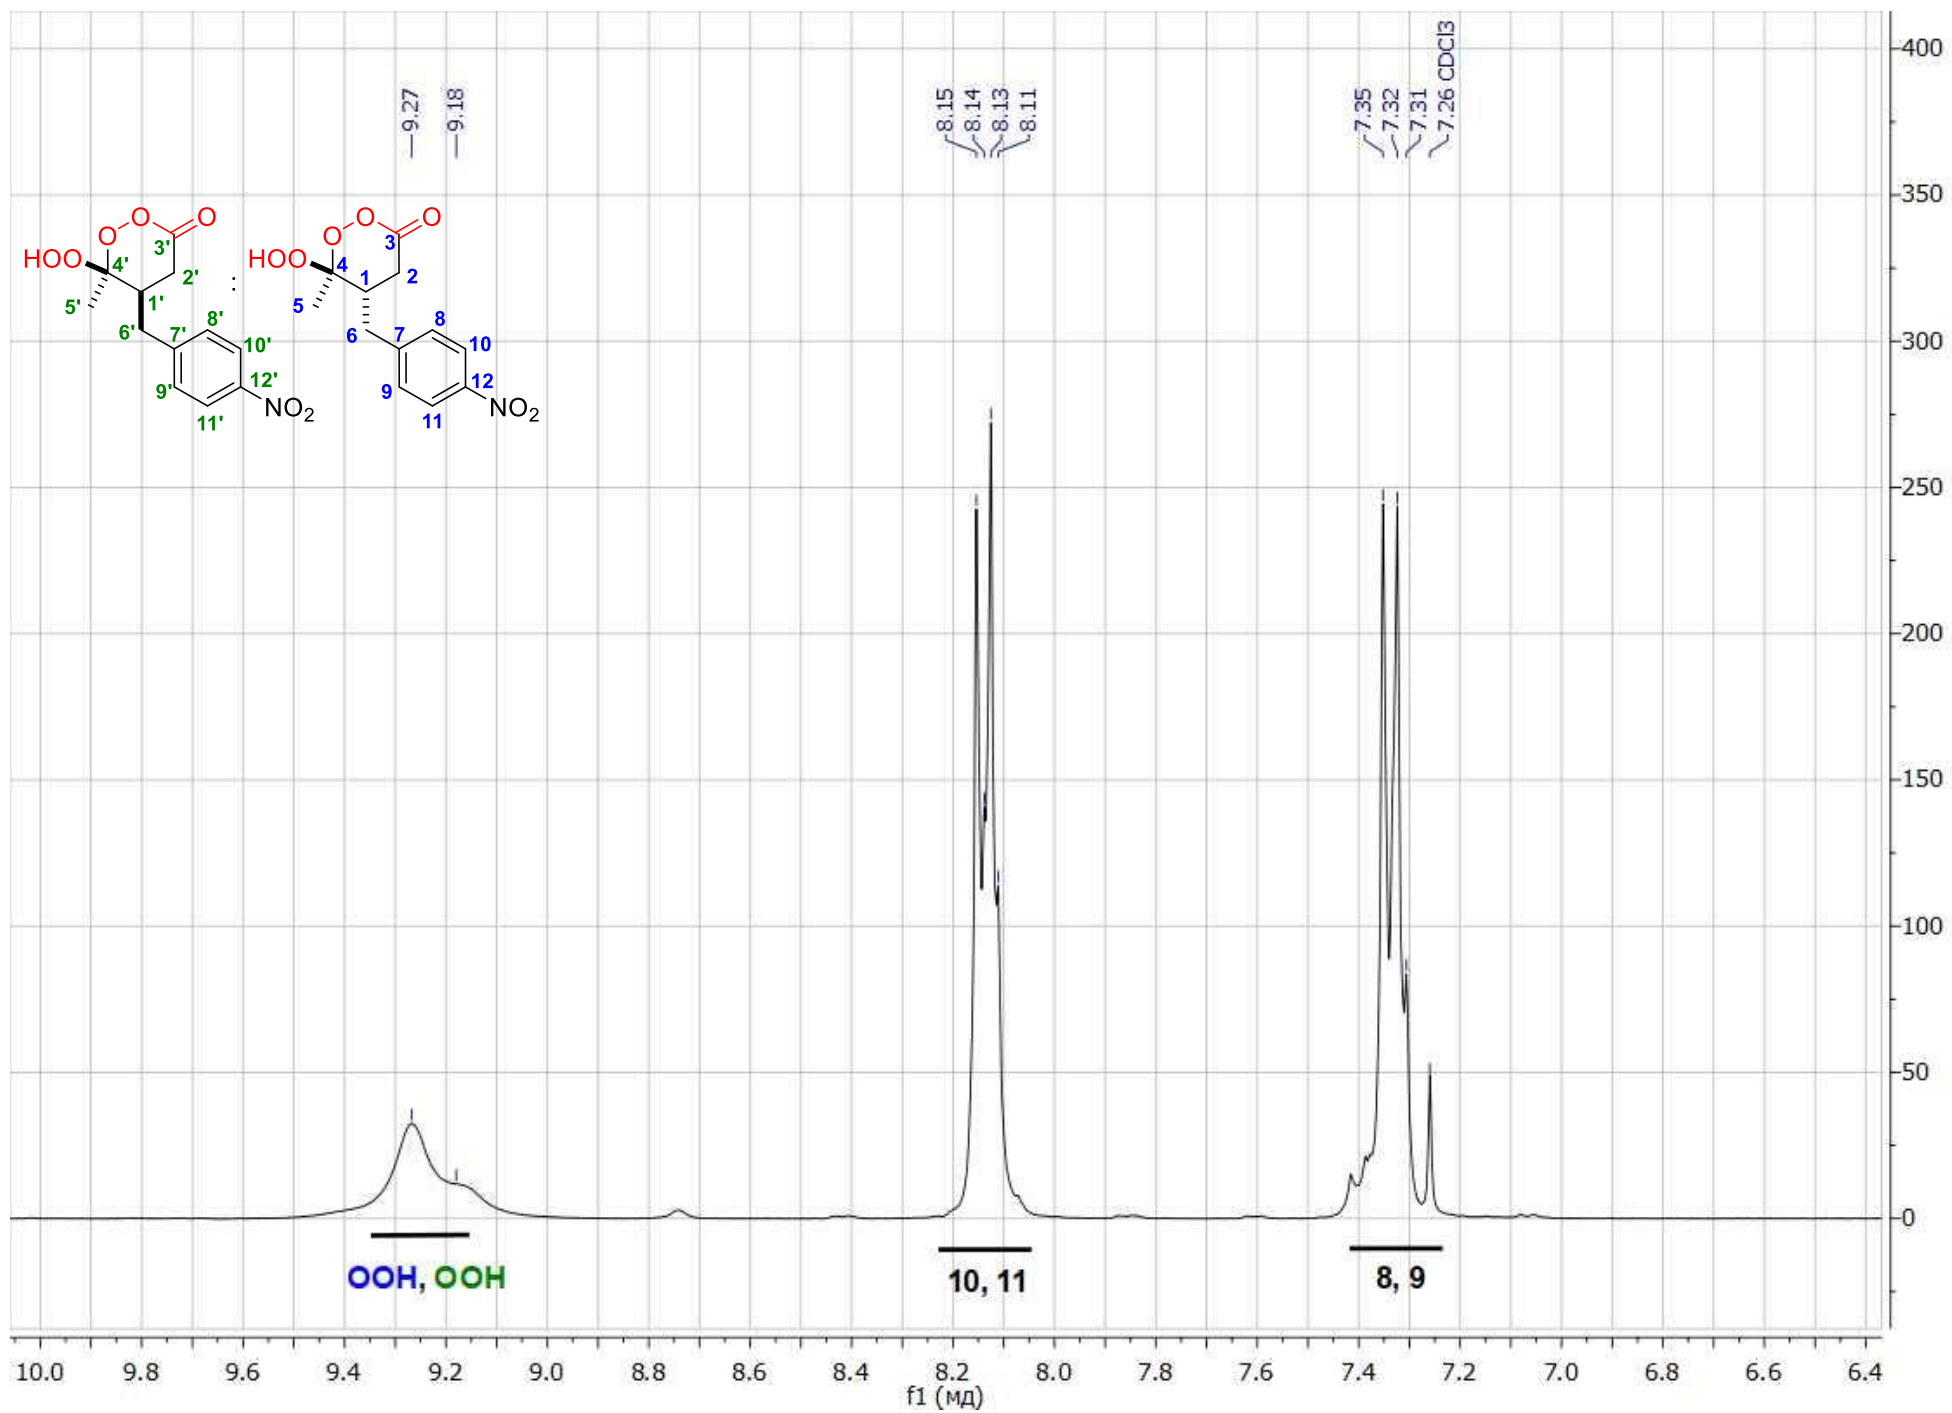



<sup>13</sup>C NMR

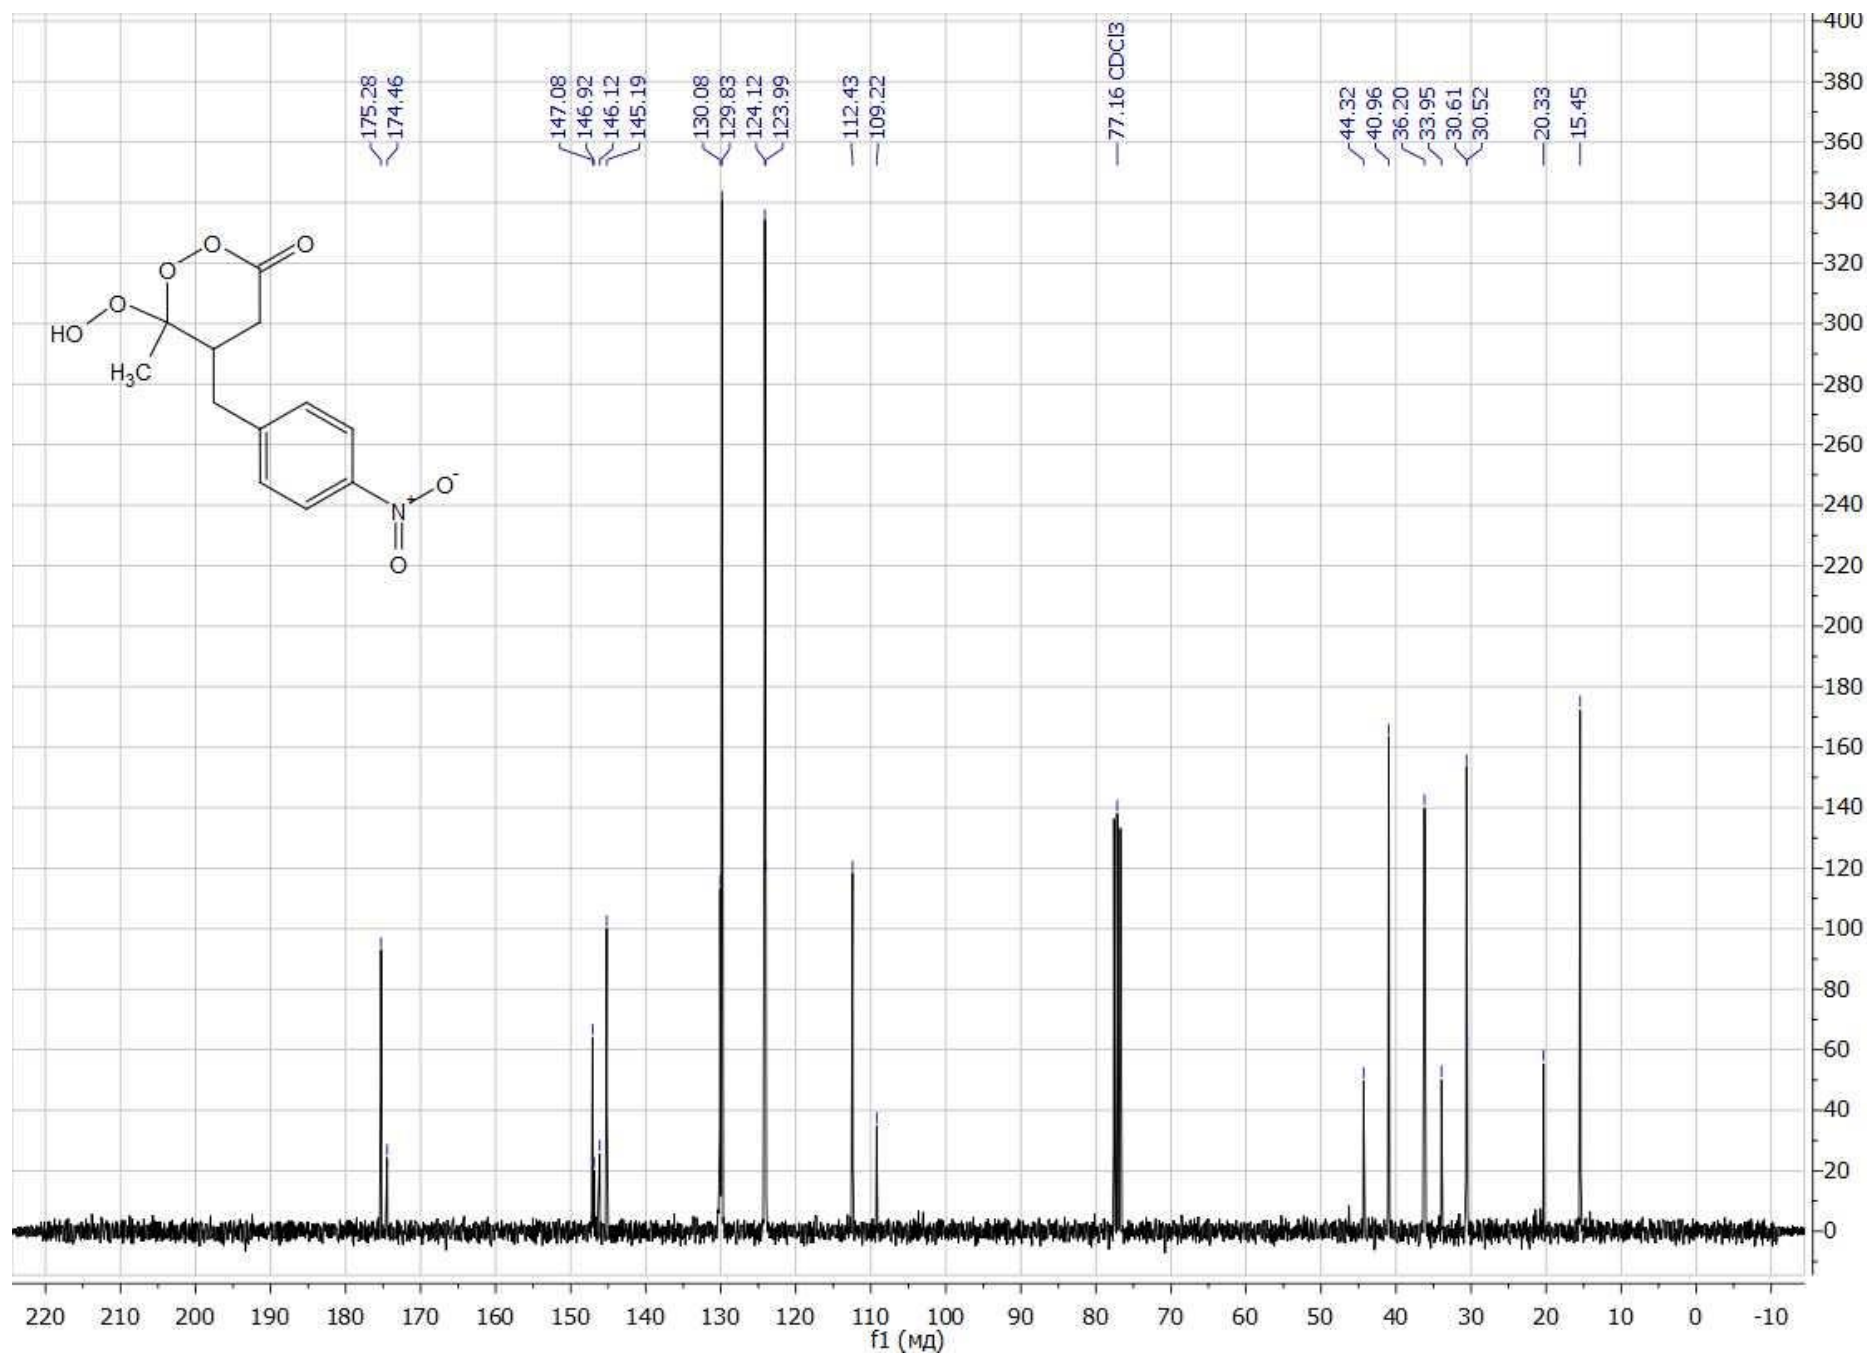

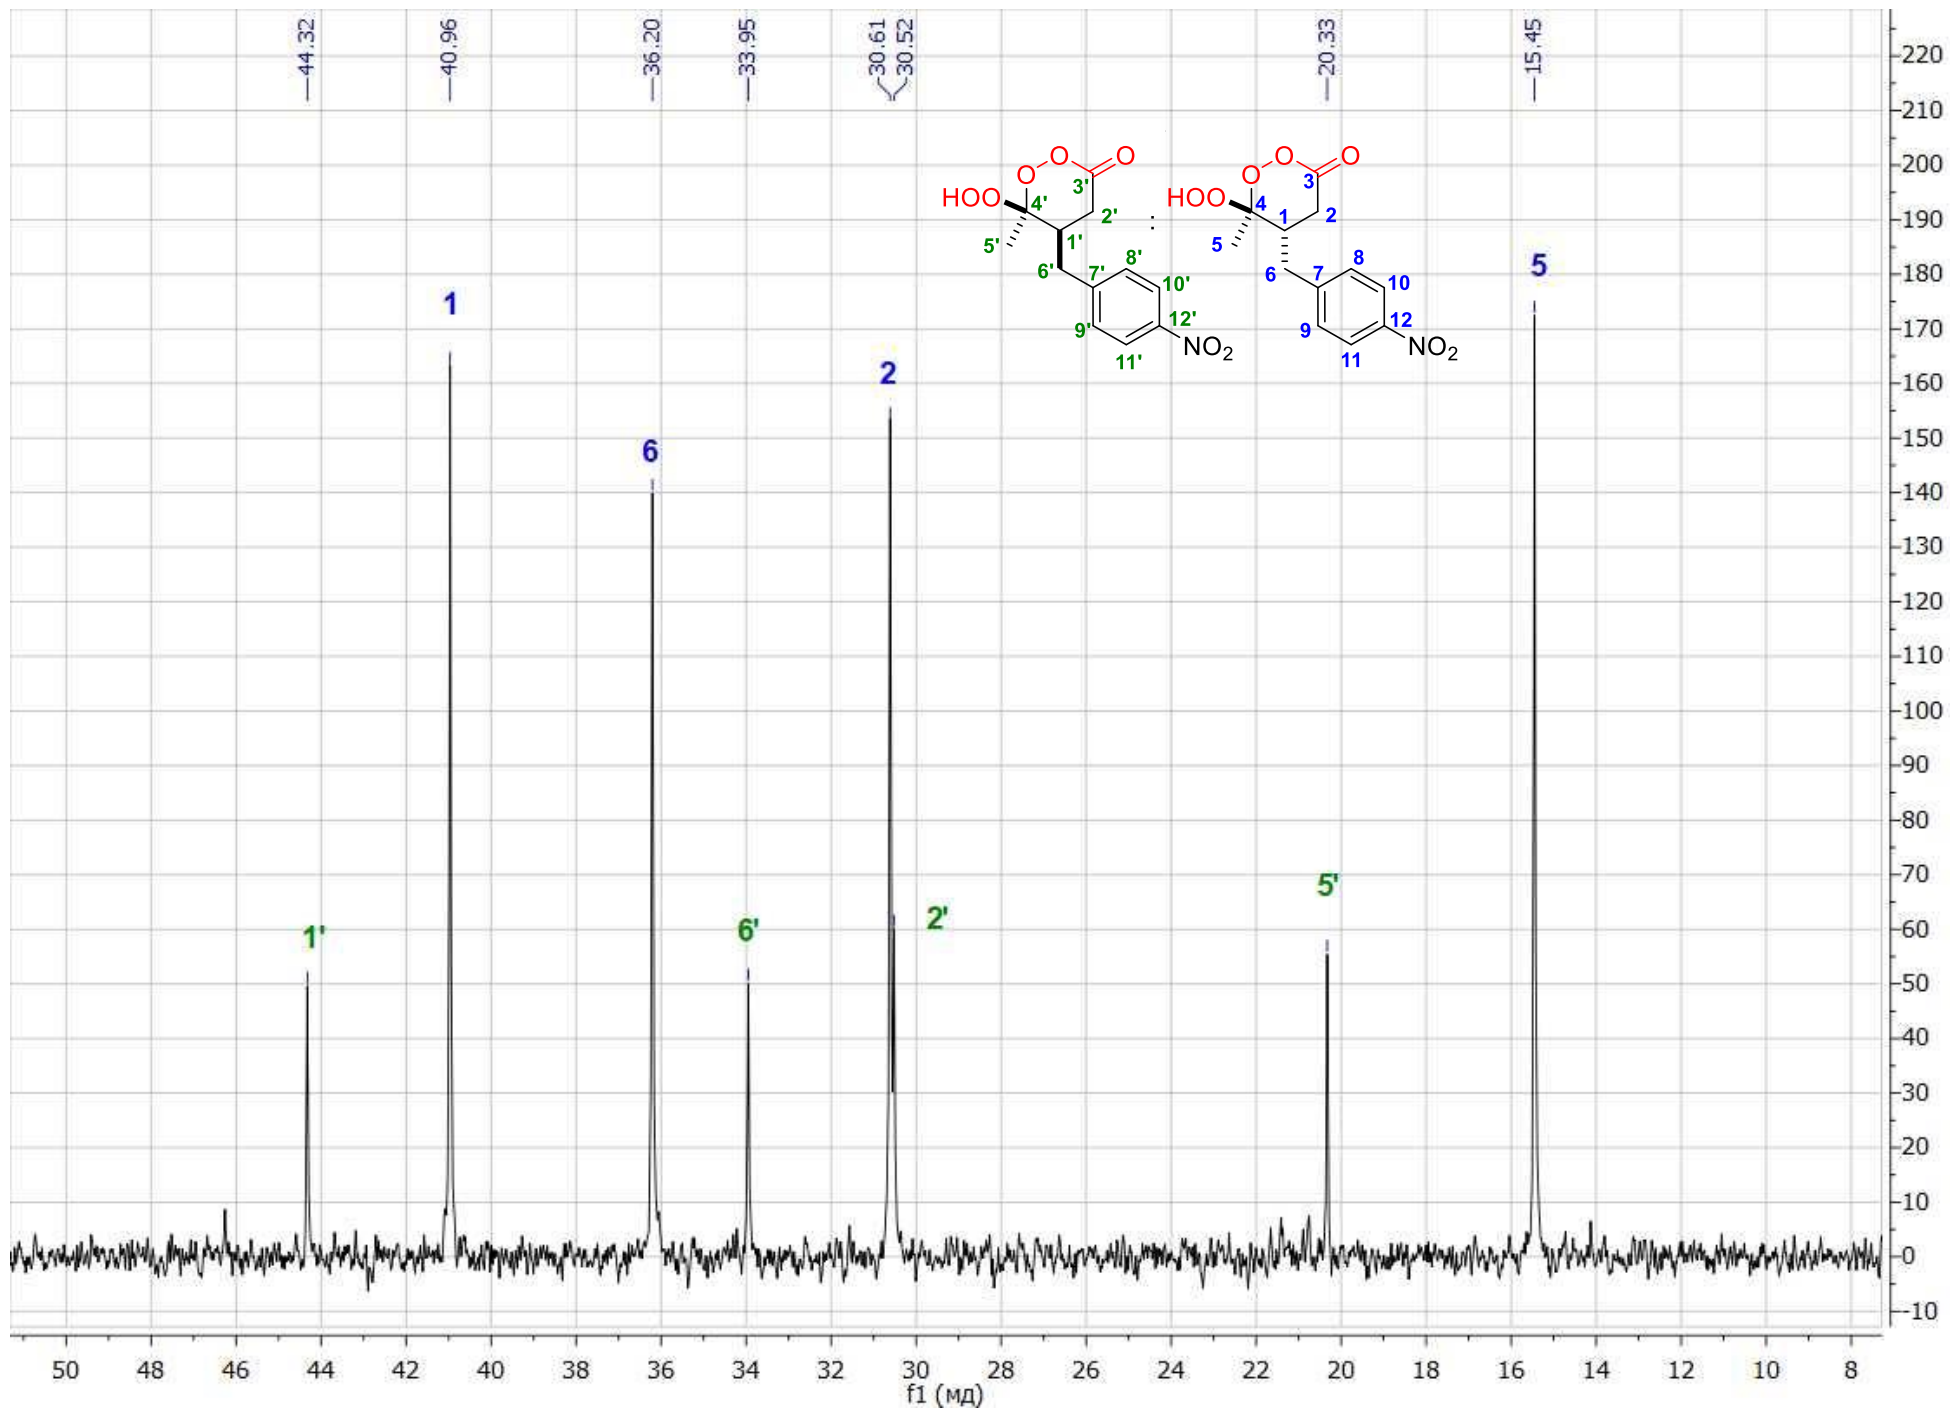

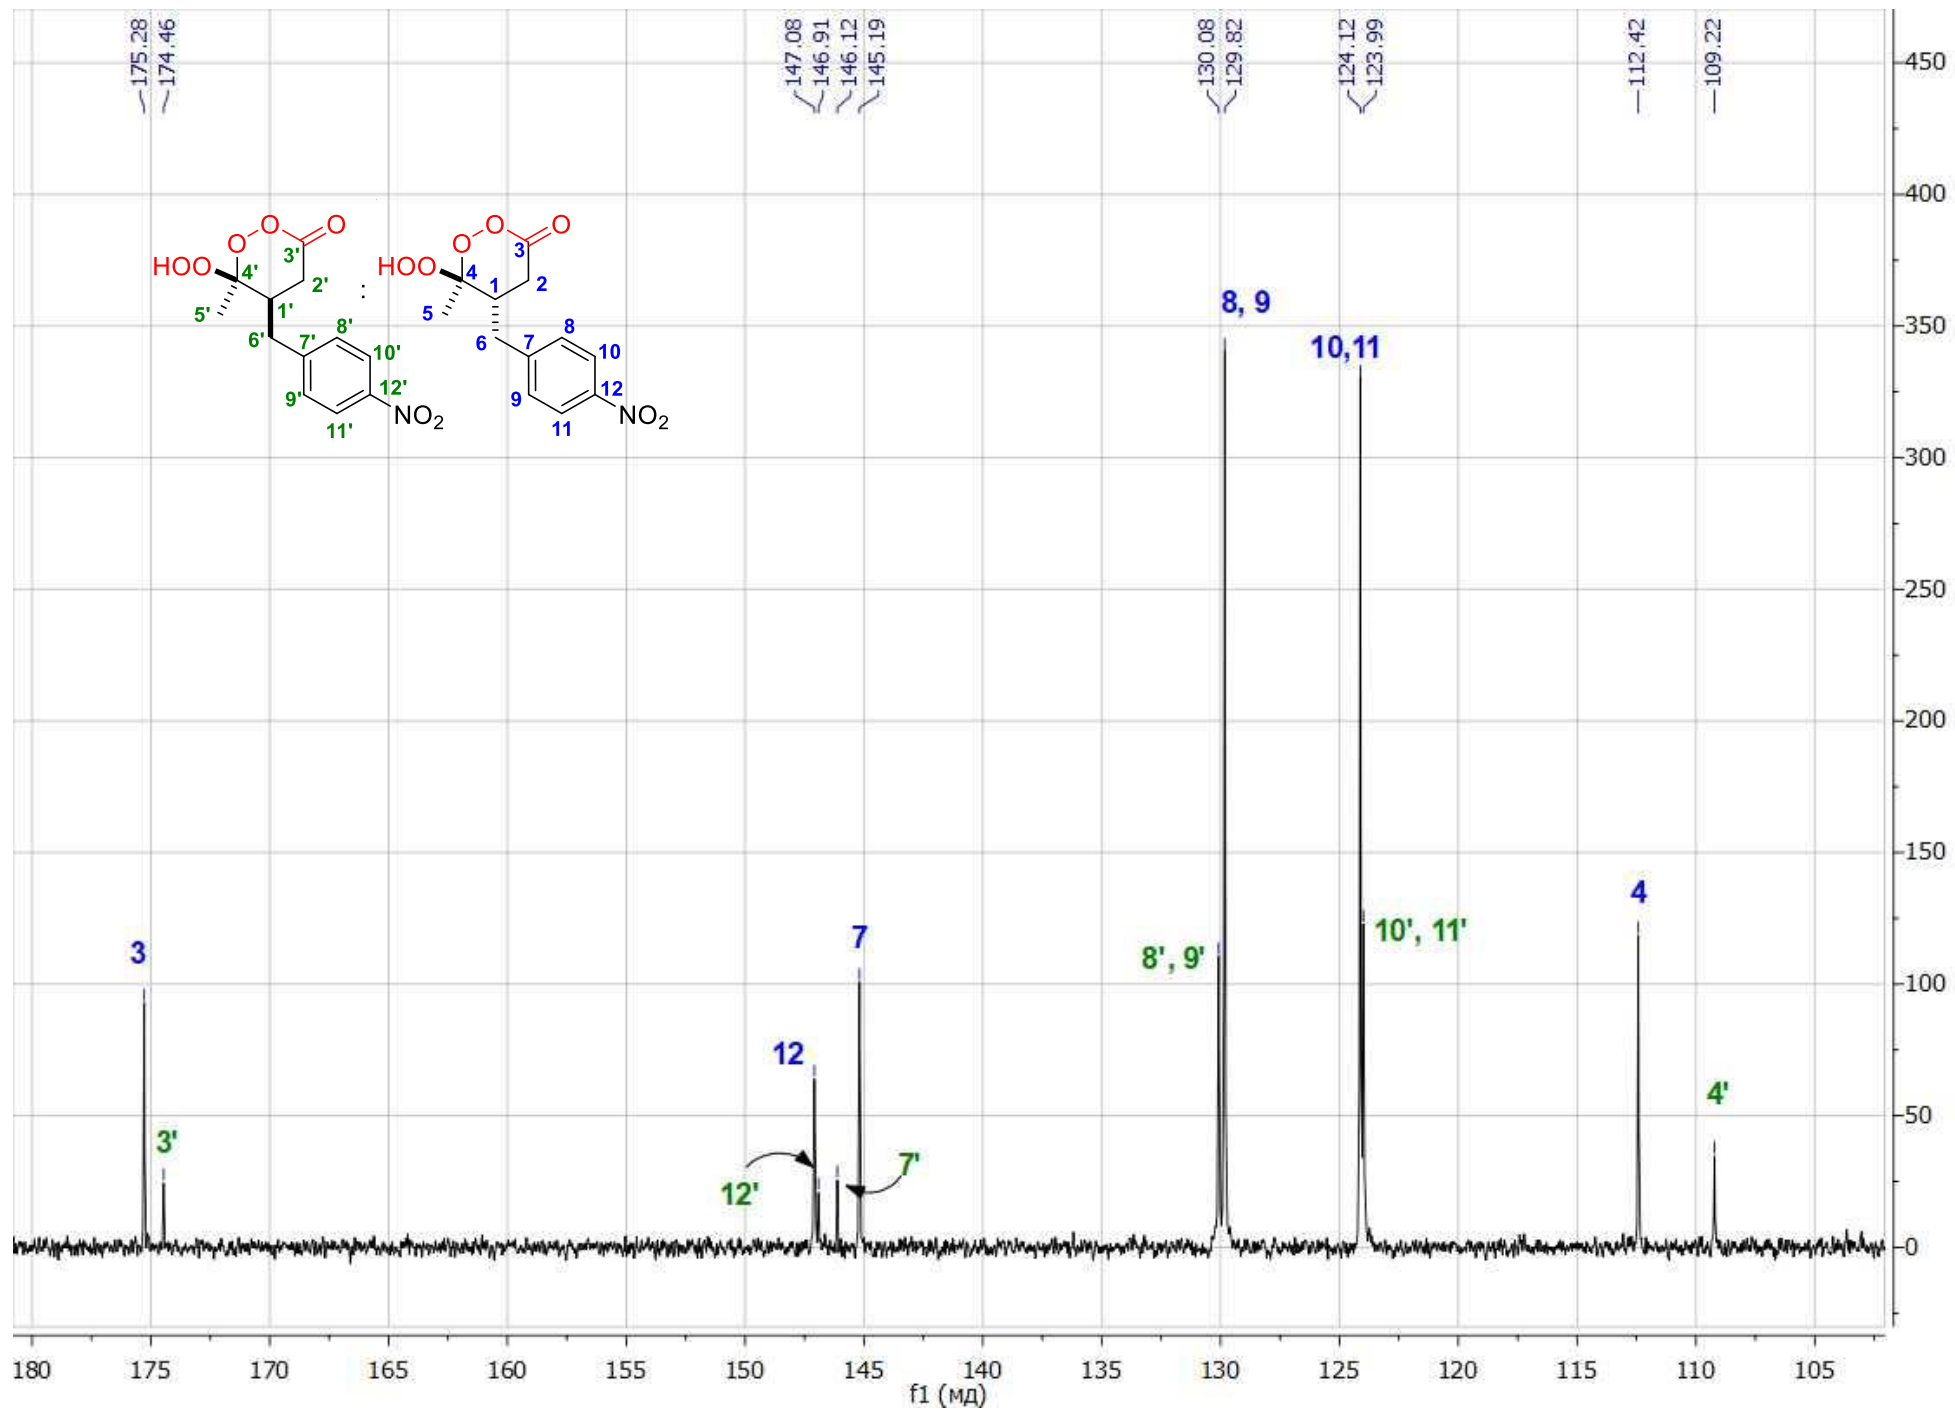

<sup>13</sup>C\_deptsp135

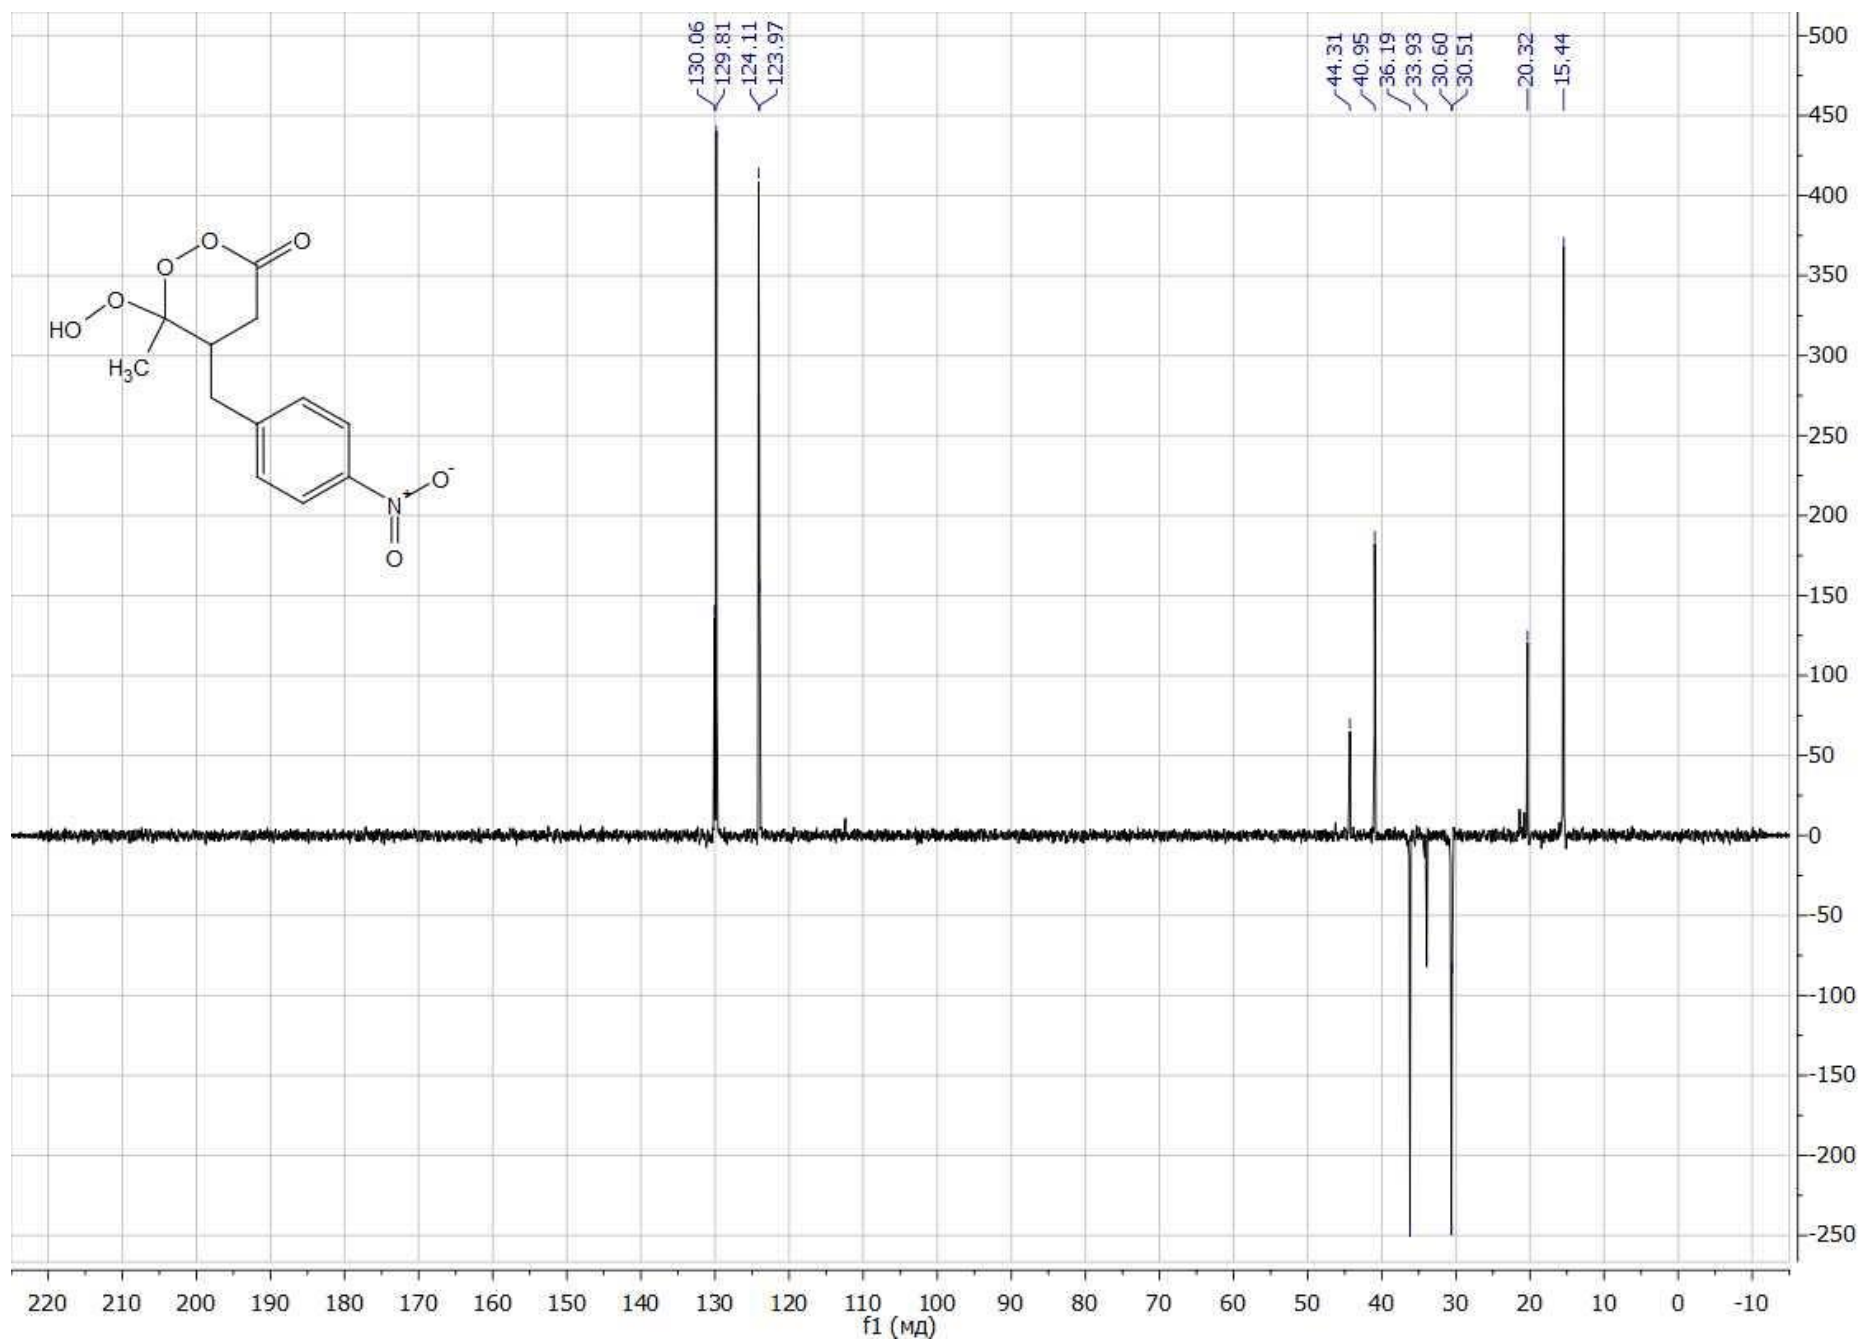

{<sup>1</sup>H-<sup>1</sup>H} COSY

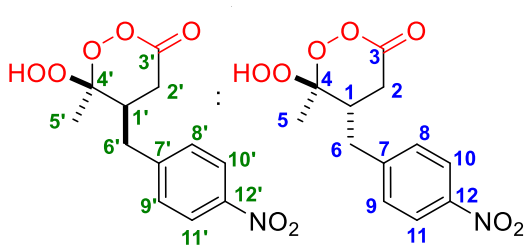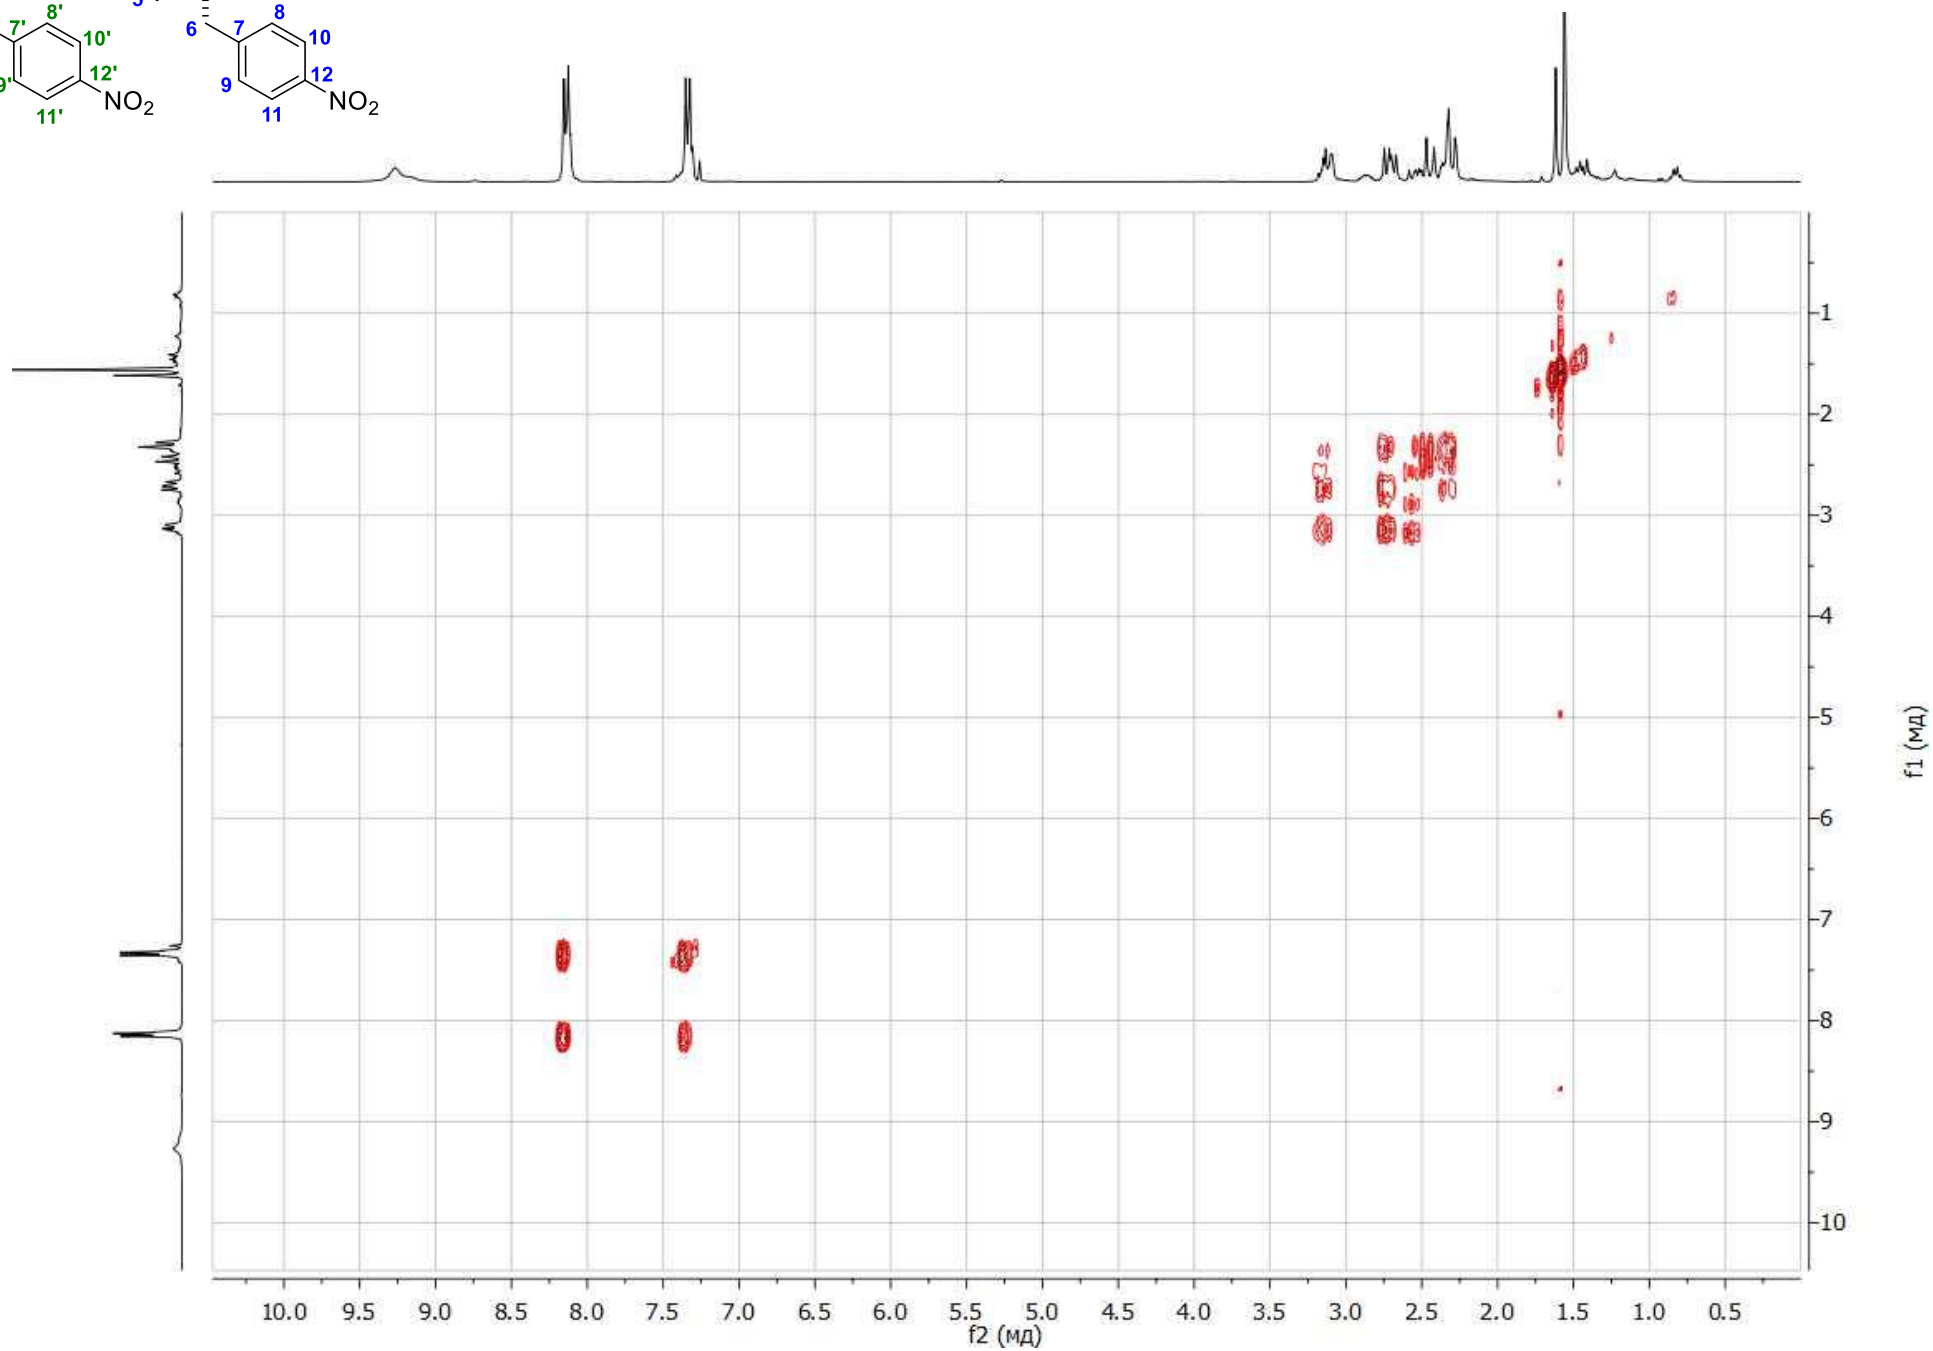

{<sup>1</sup>H-<sup>1</sup>H} NOESY

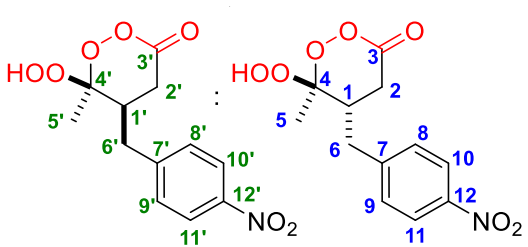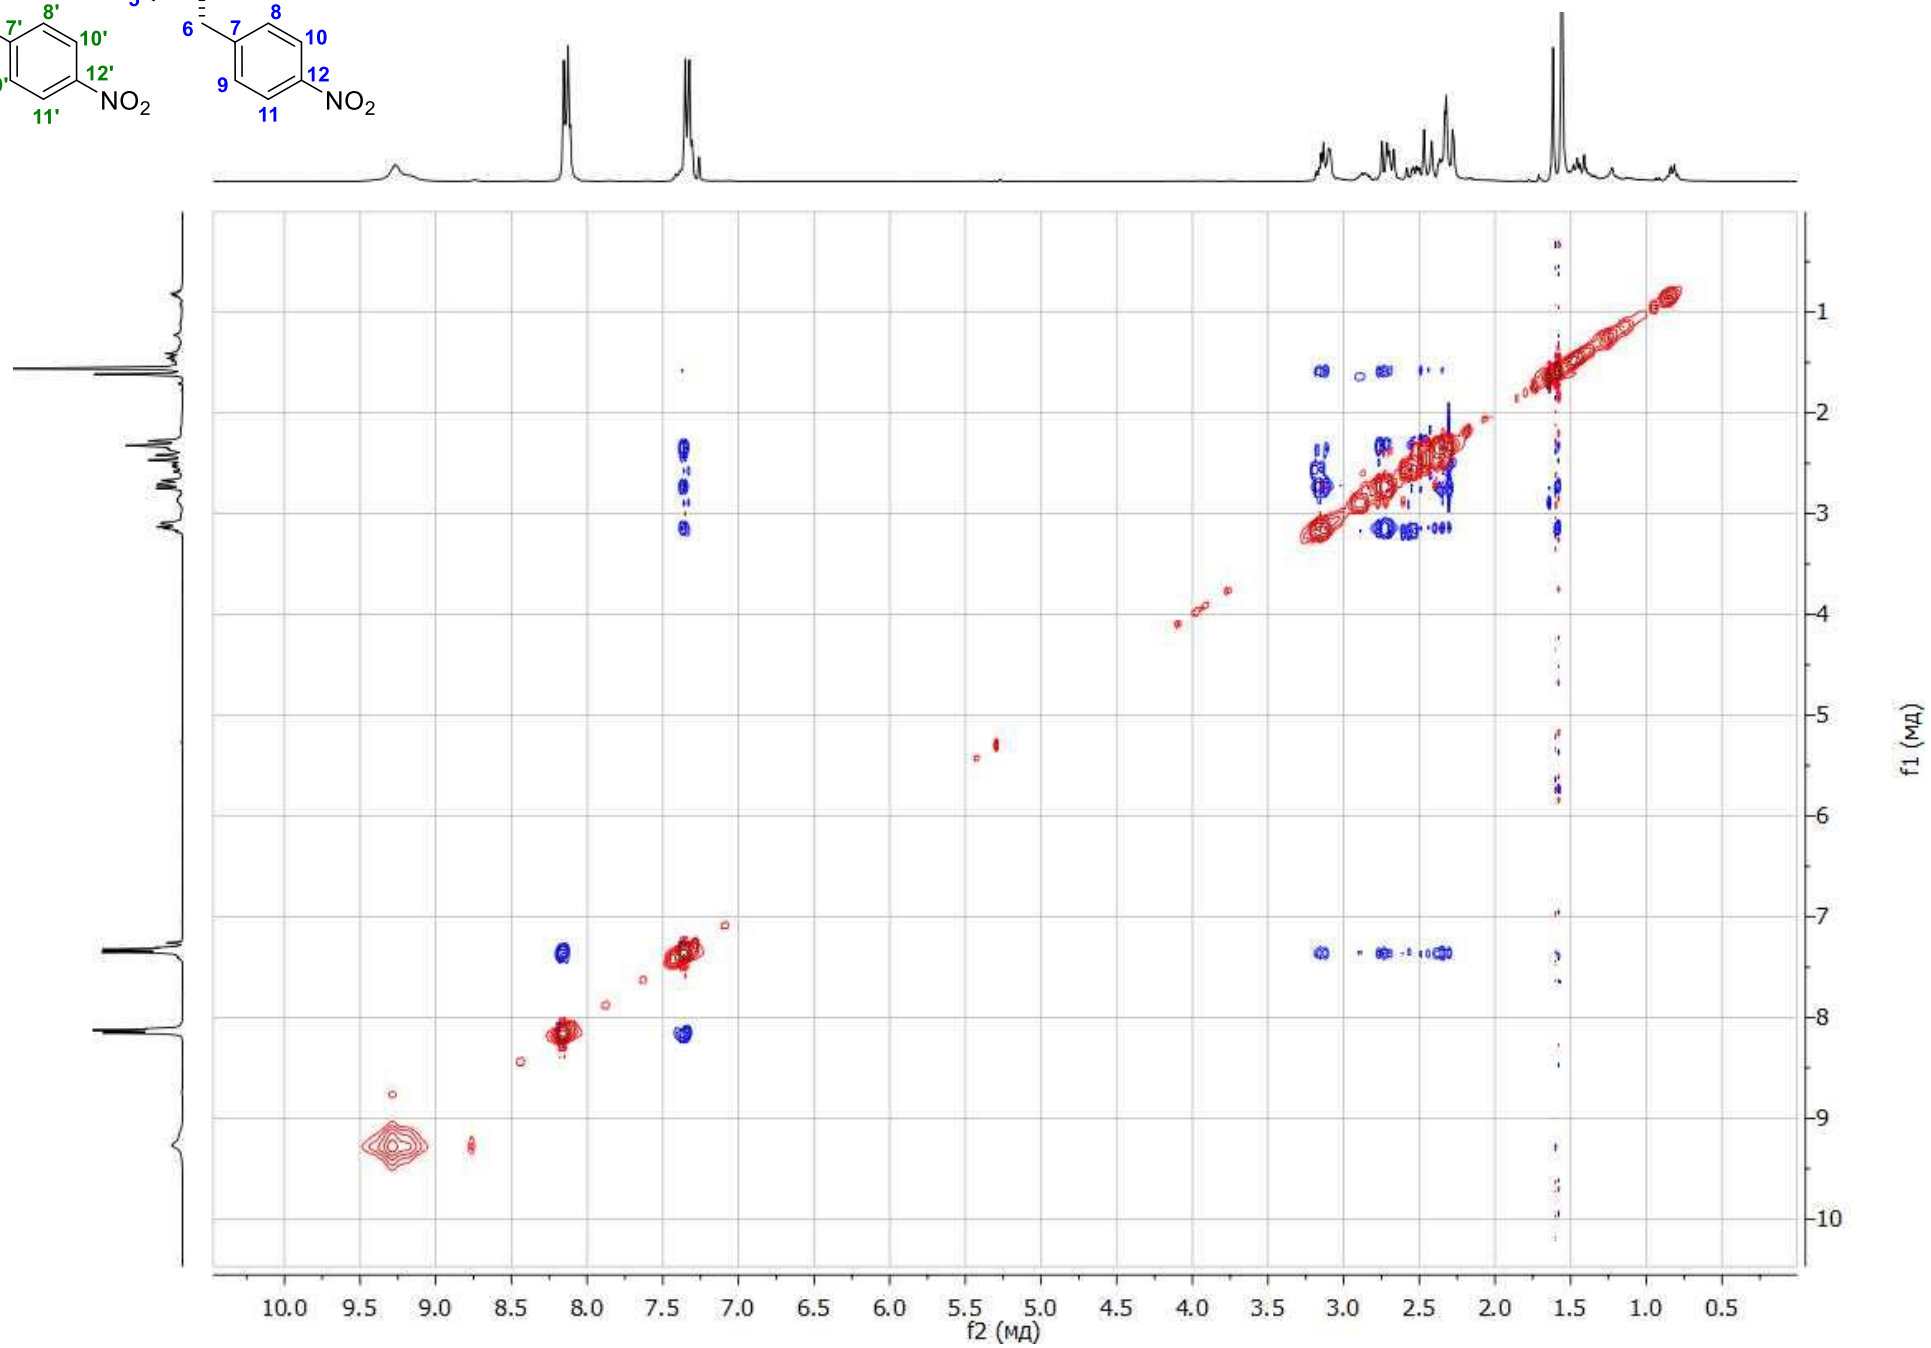

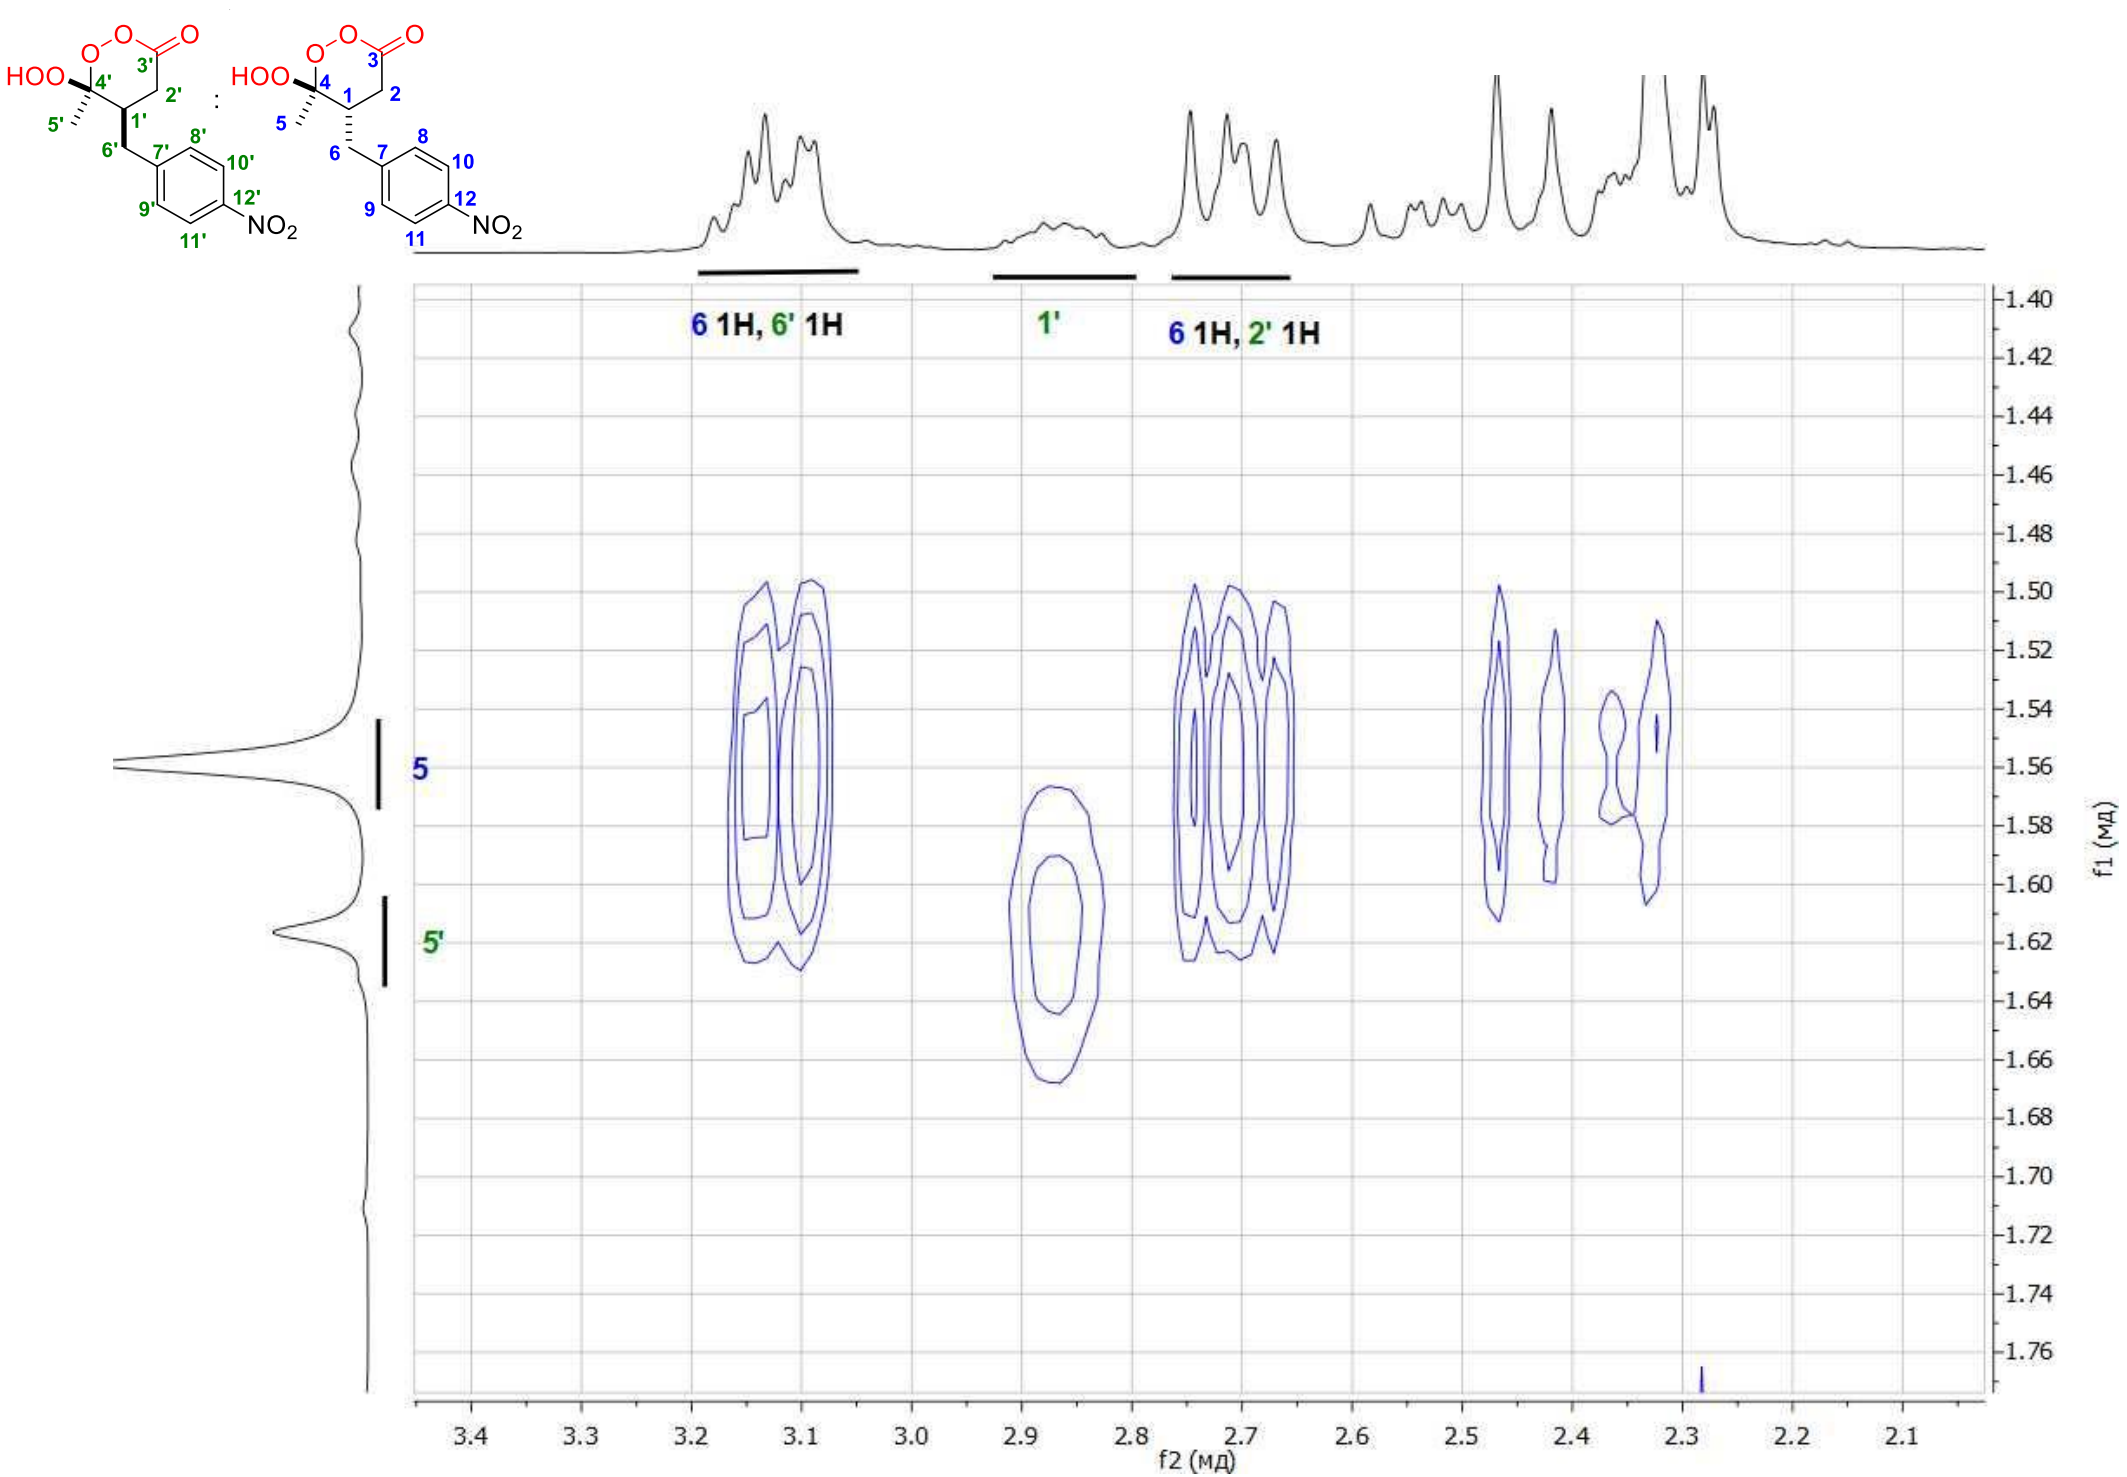

{<sup>1</sup>H-<sup>13</sup>C} HSQC

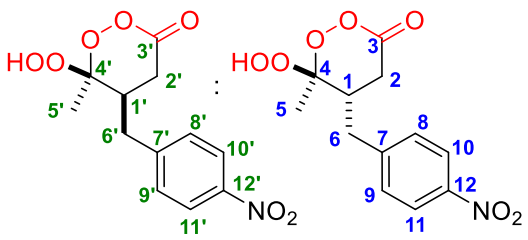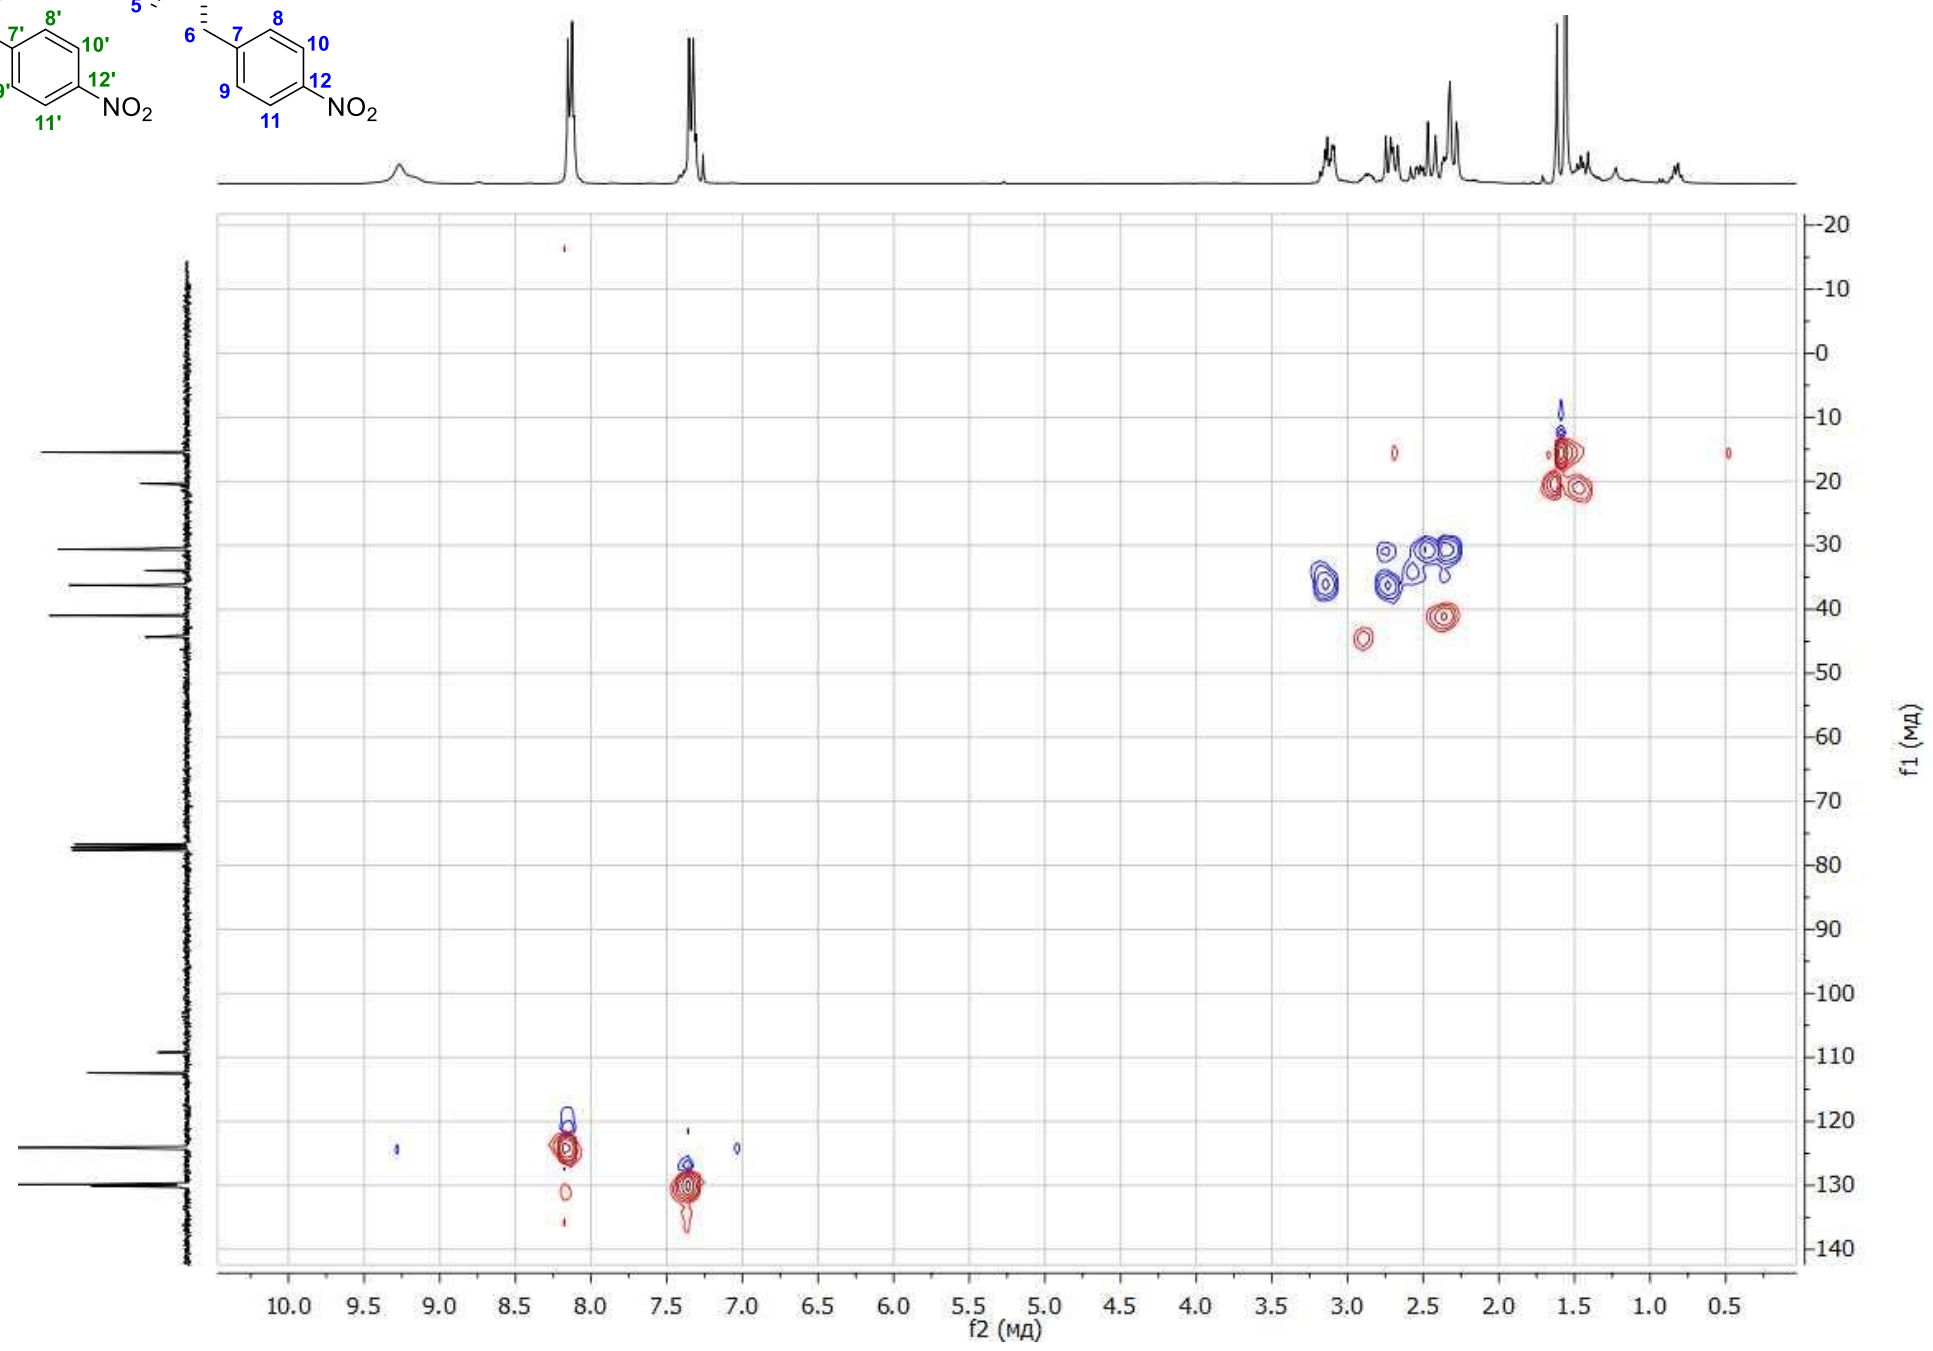



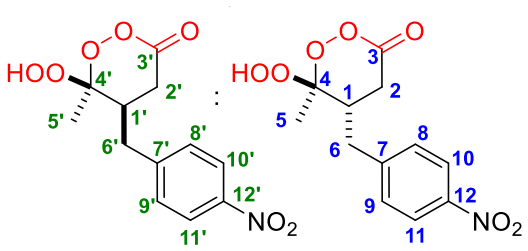

{<sup>1</sup>H-<sup>13</sup>C} HMBC

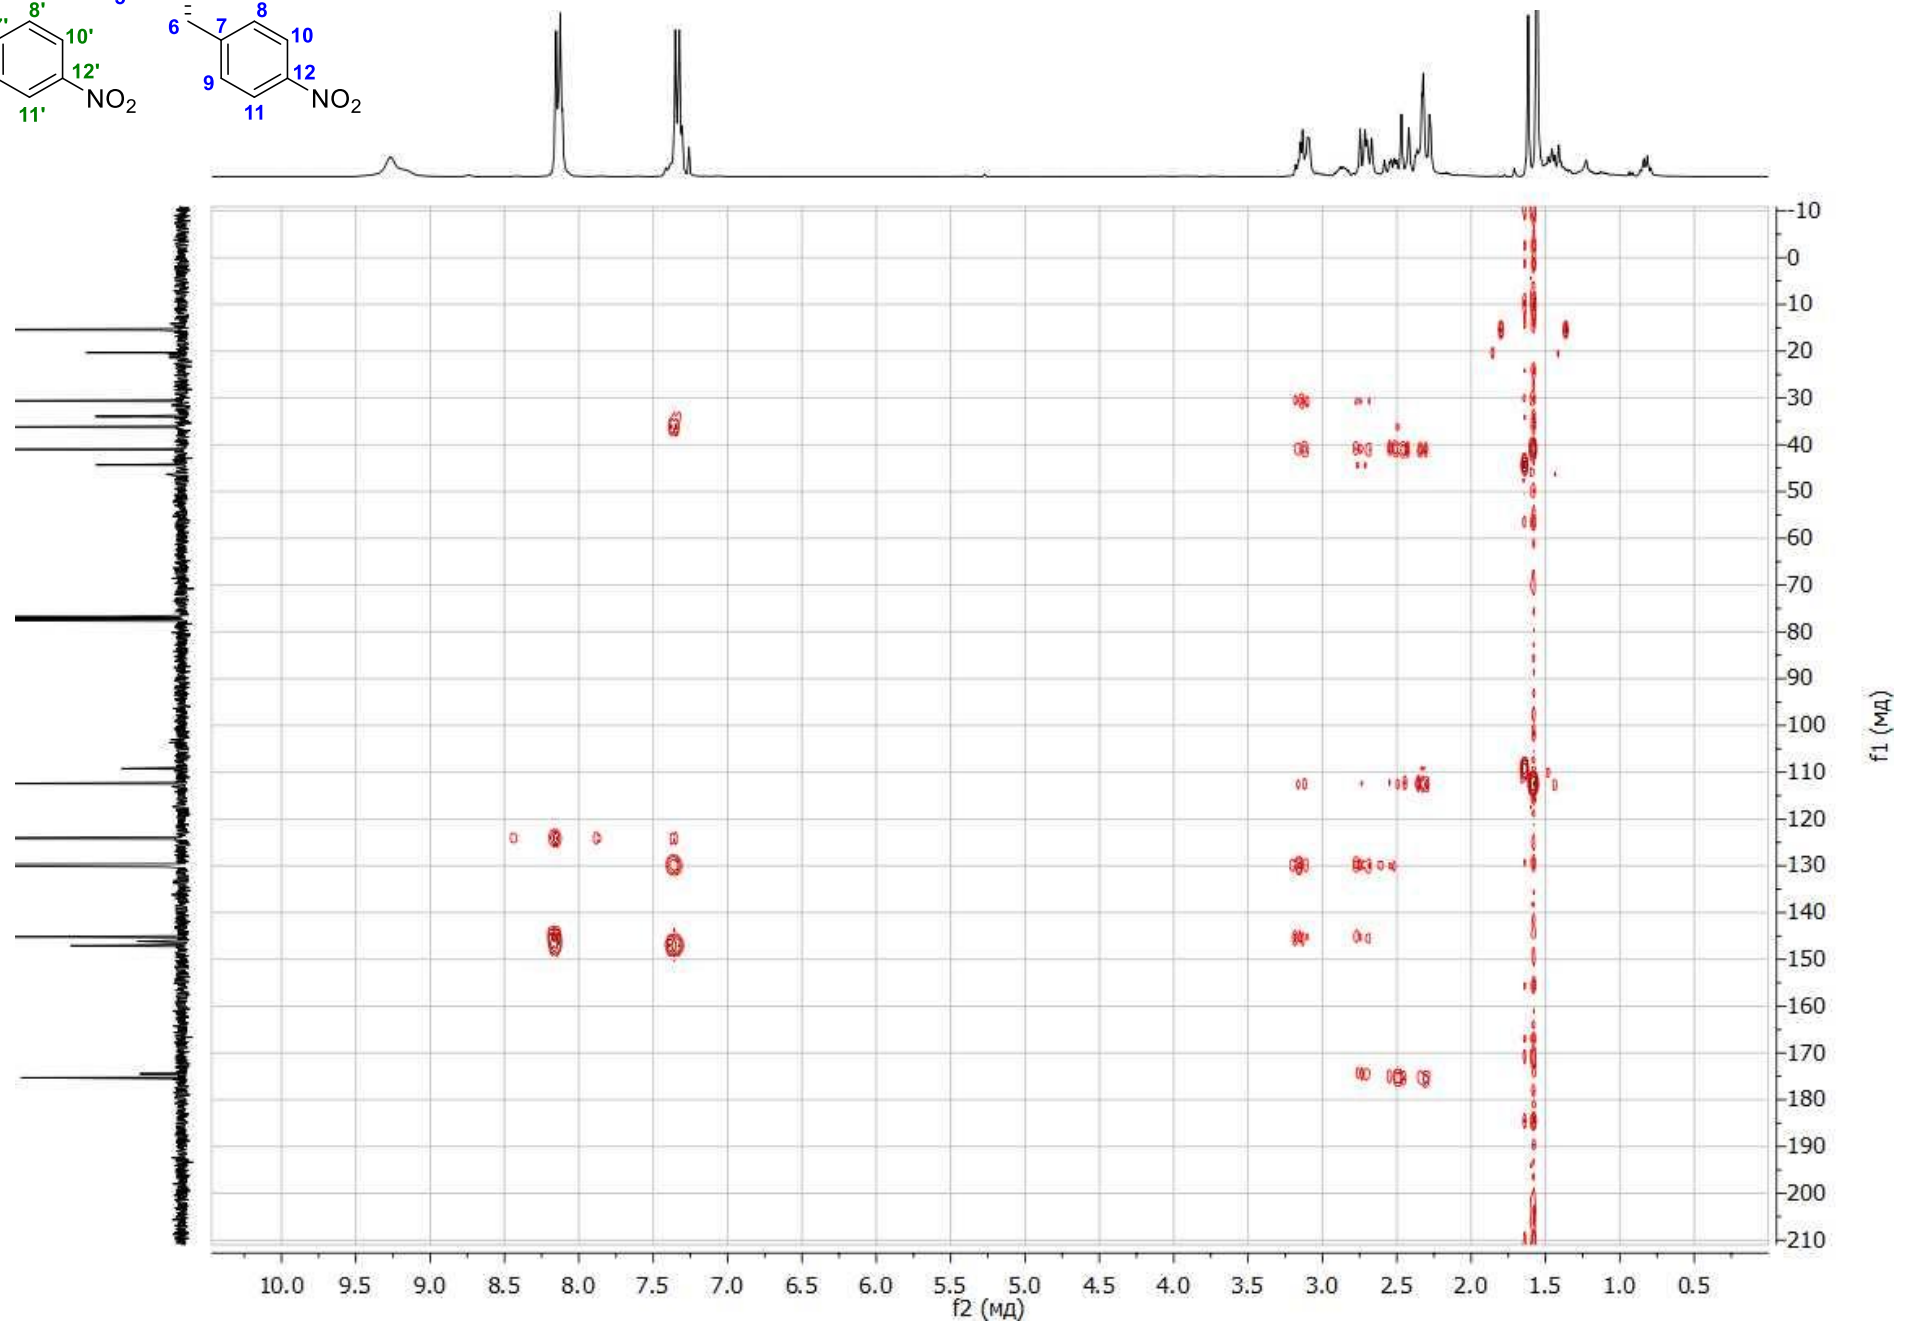

5-(4-Chlorobenzyl)-6-hydroperoxy-6-methyl-1,2-dioxan-3-one, 2c

<sup>1</sup>H NMR

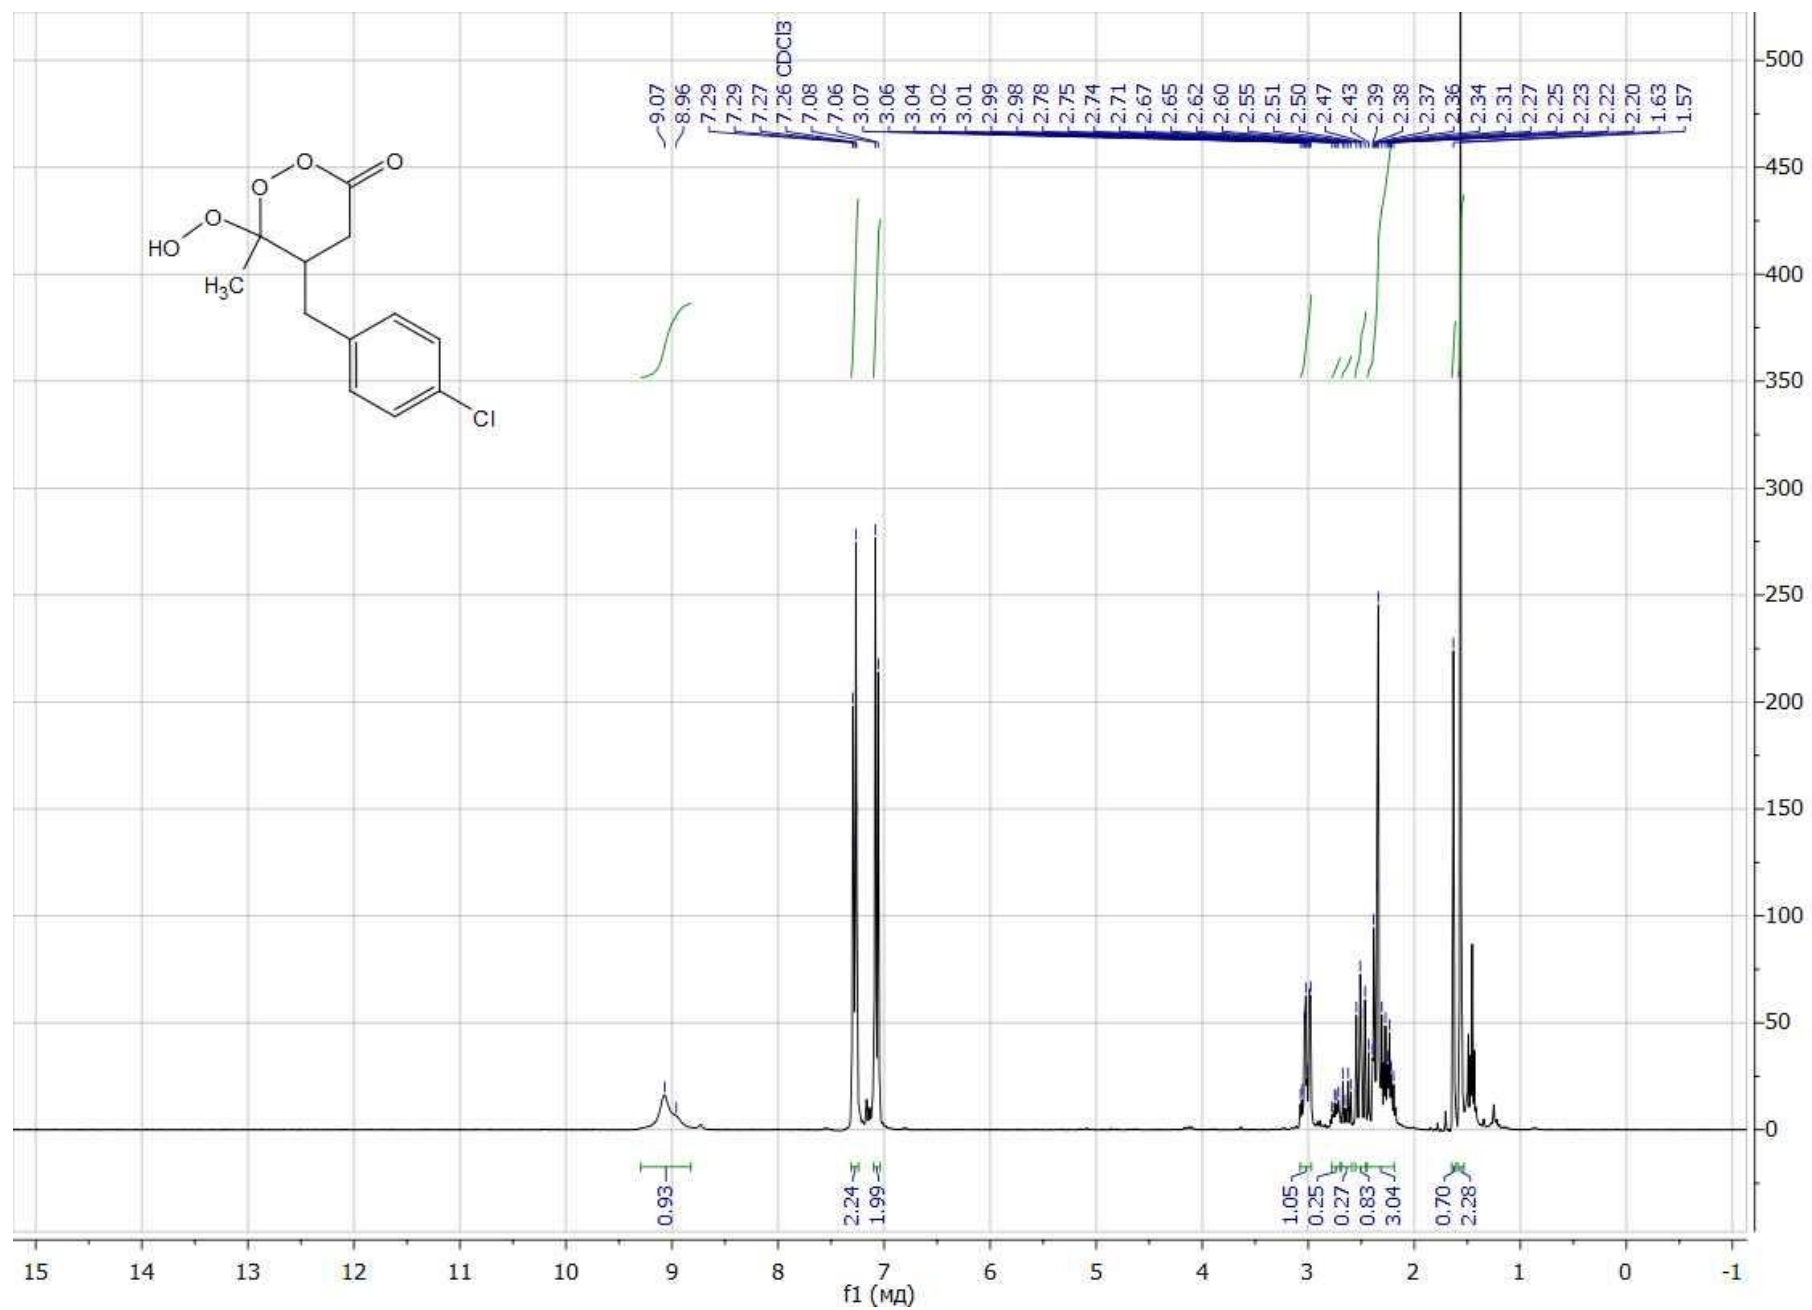

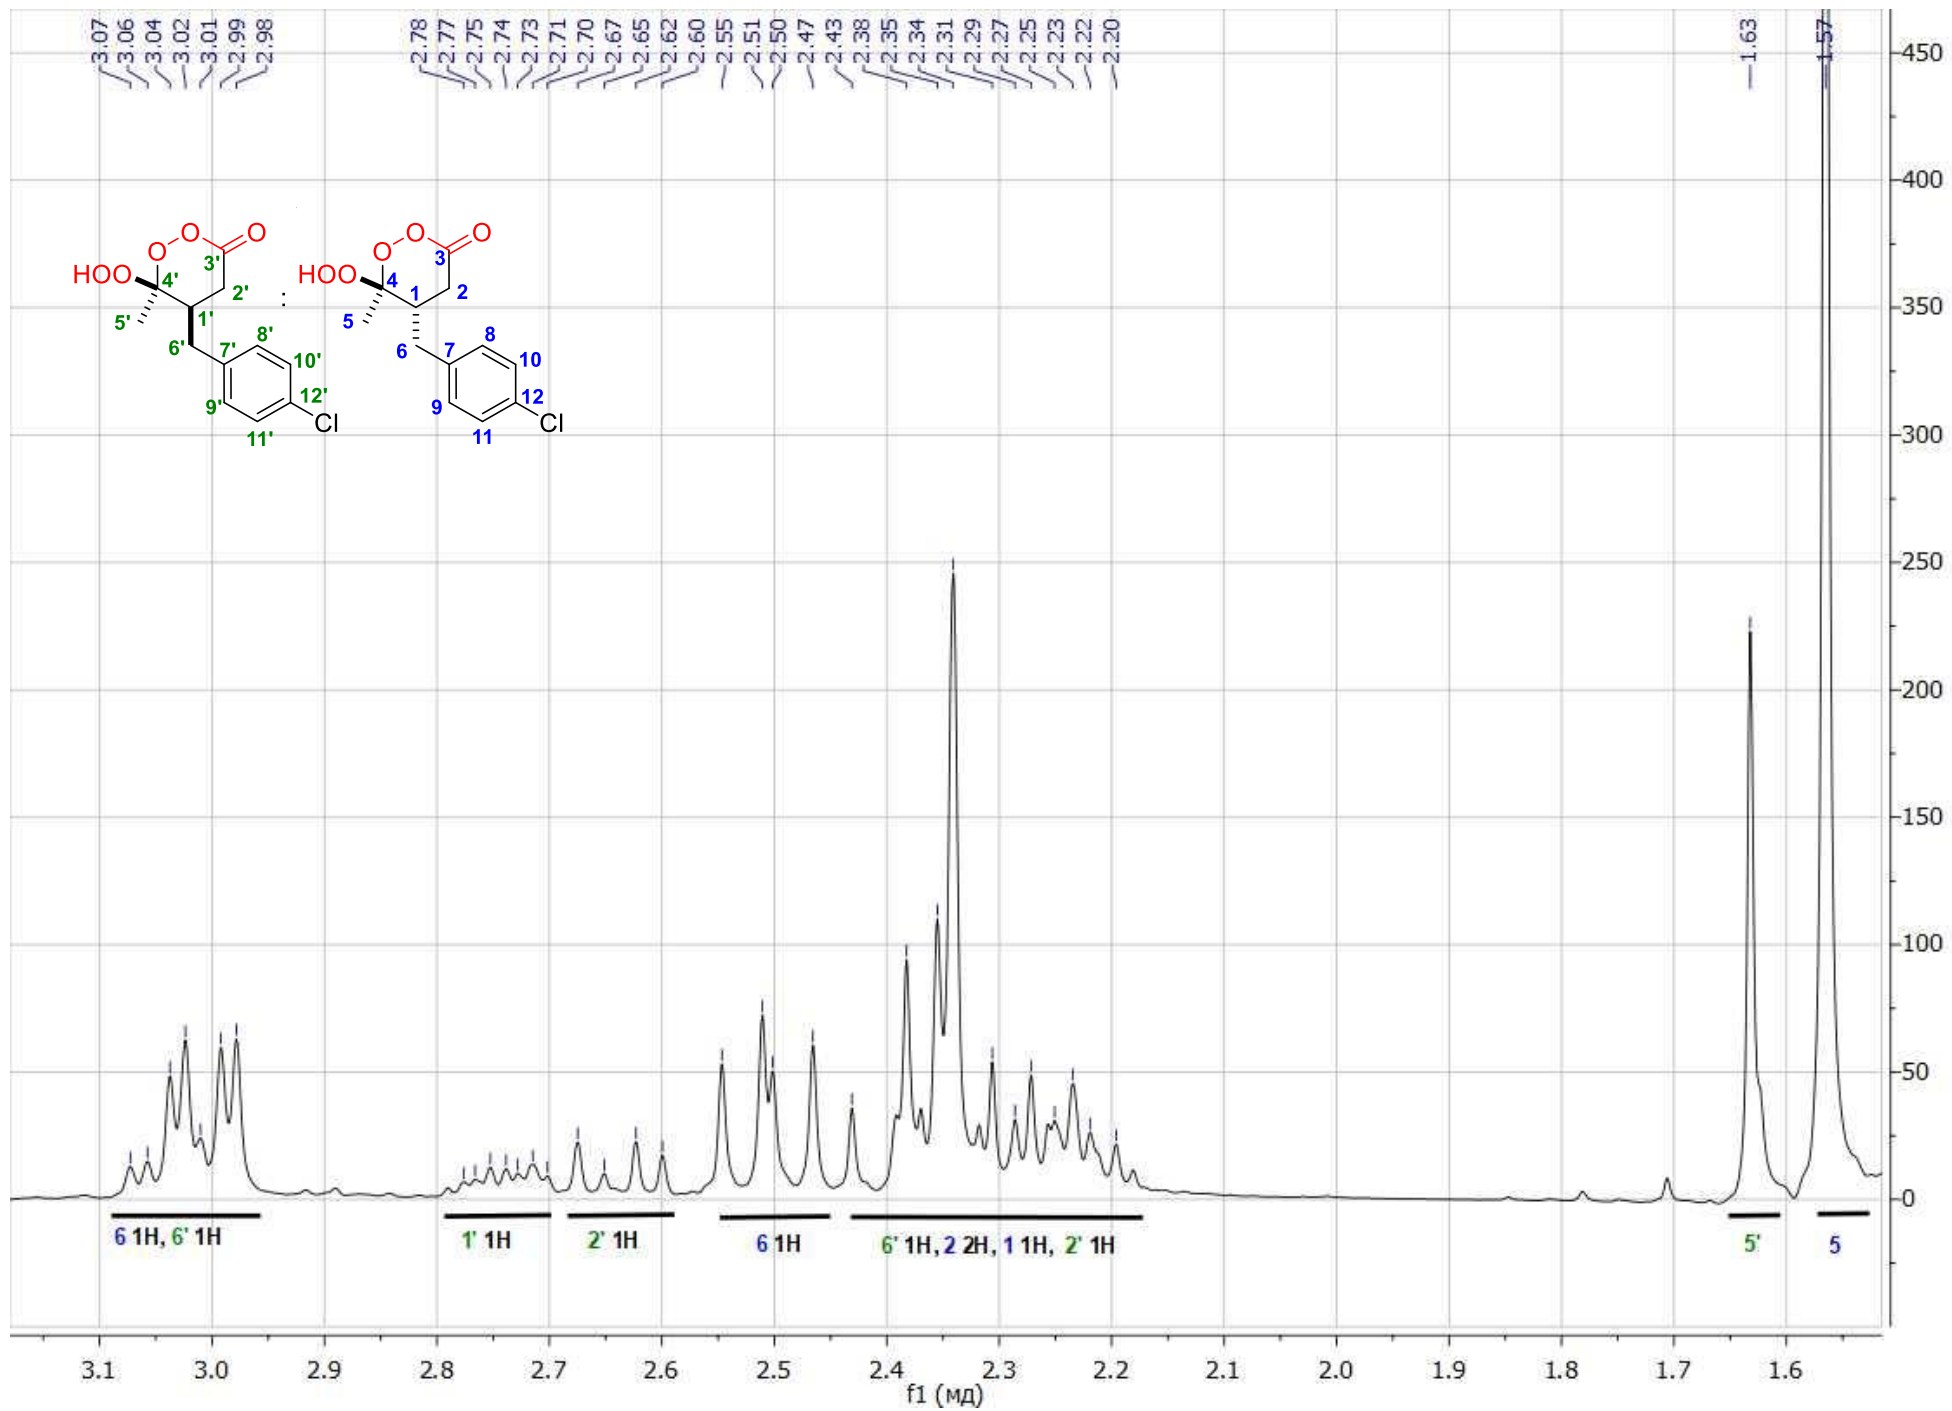

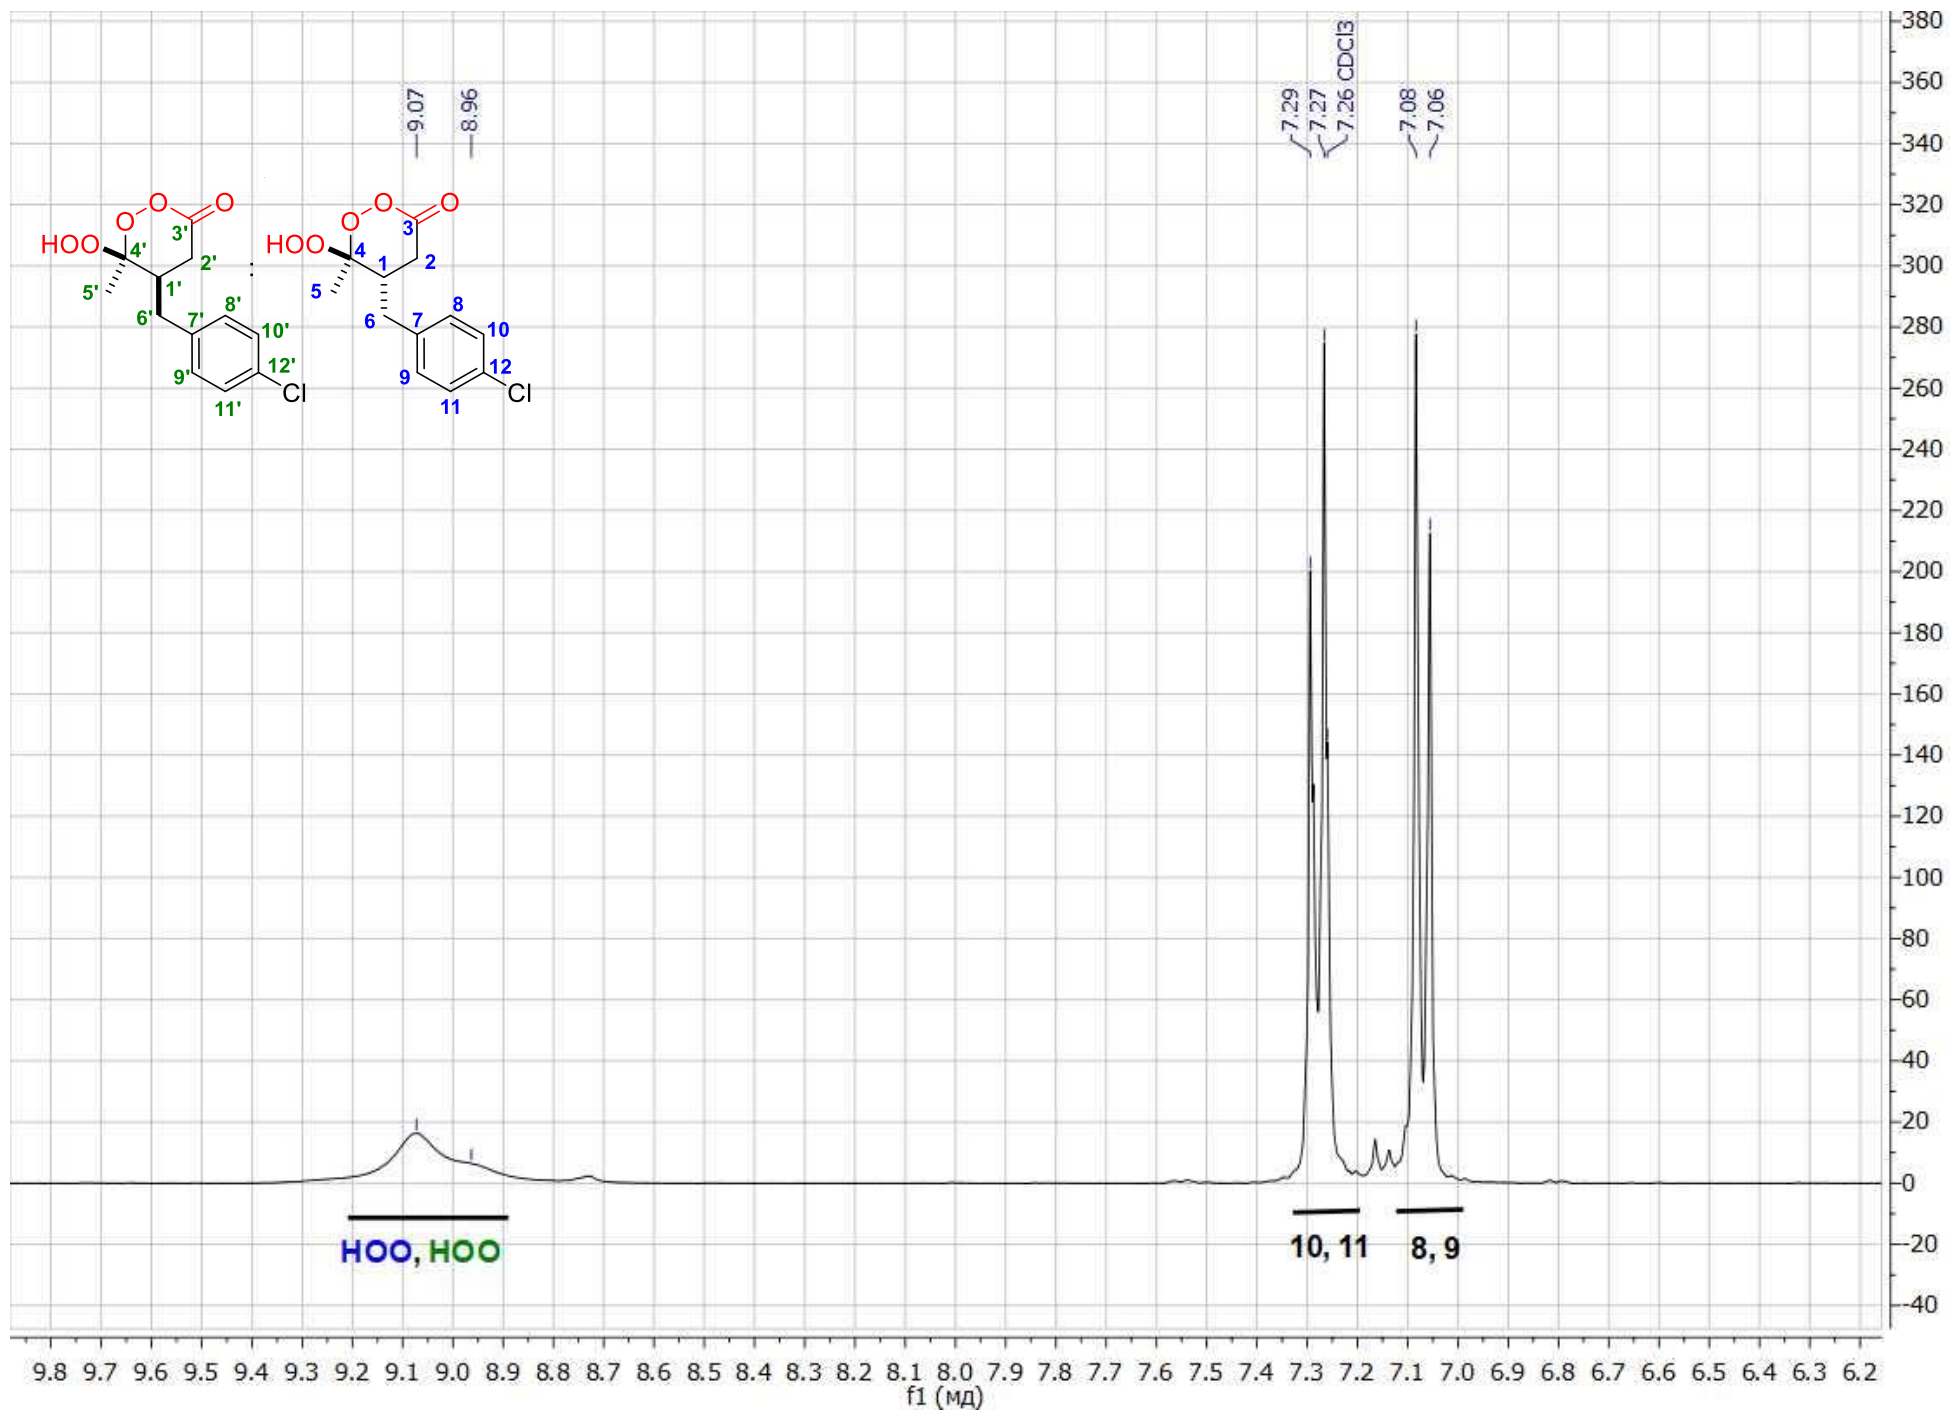

<sup>13</sup>C NMR

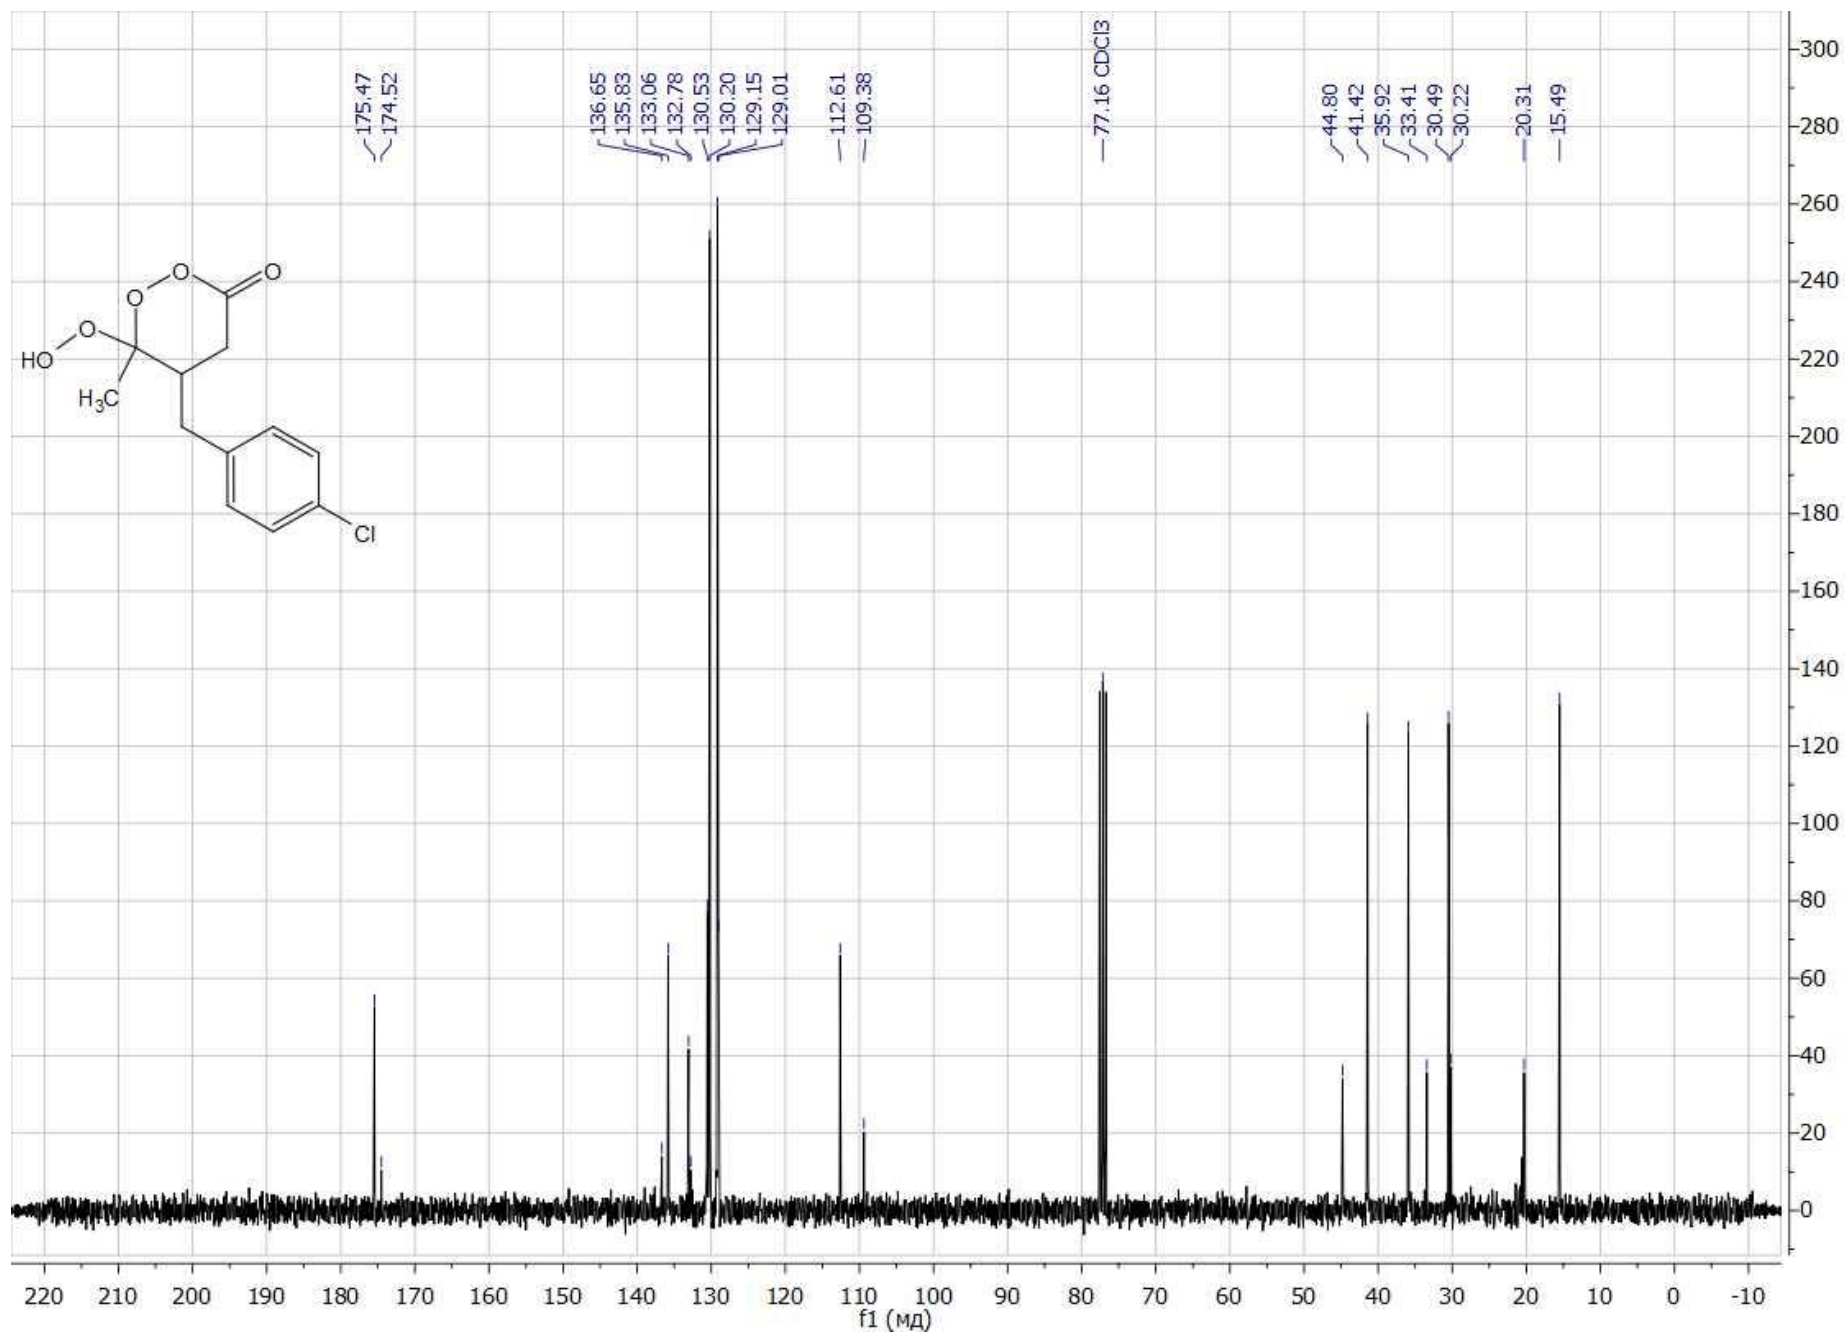

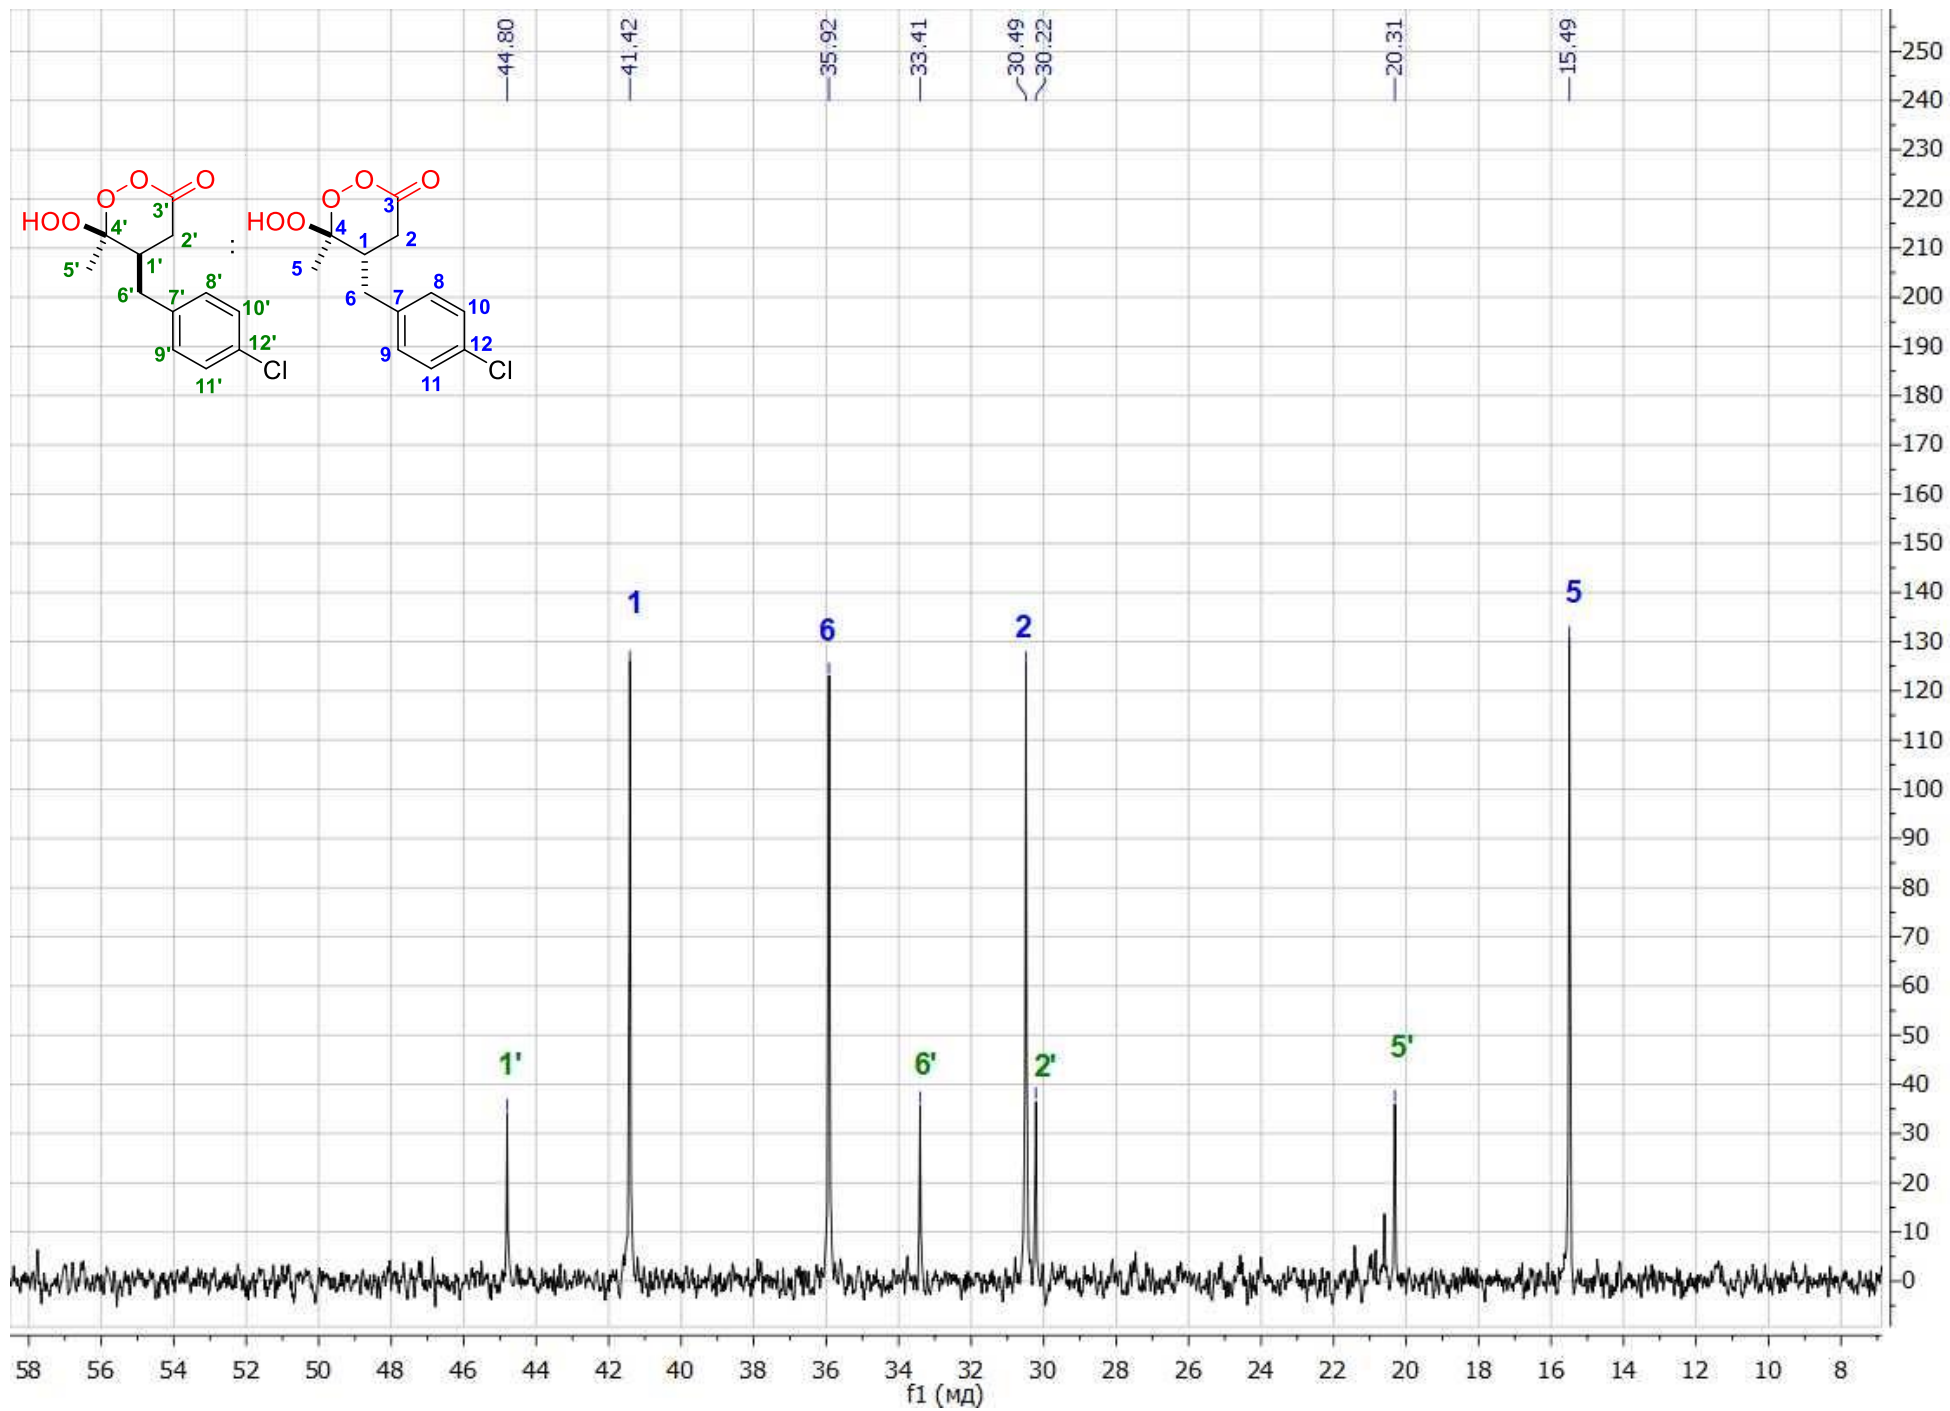

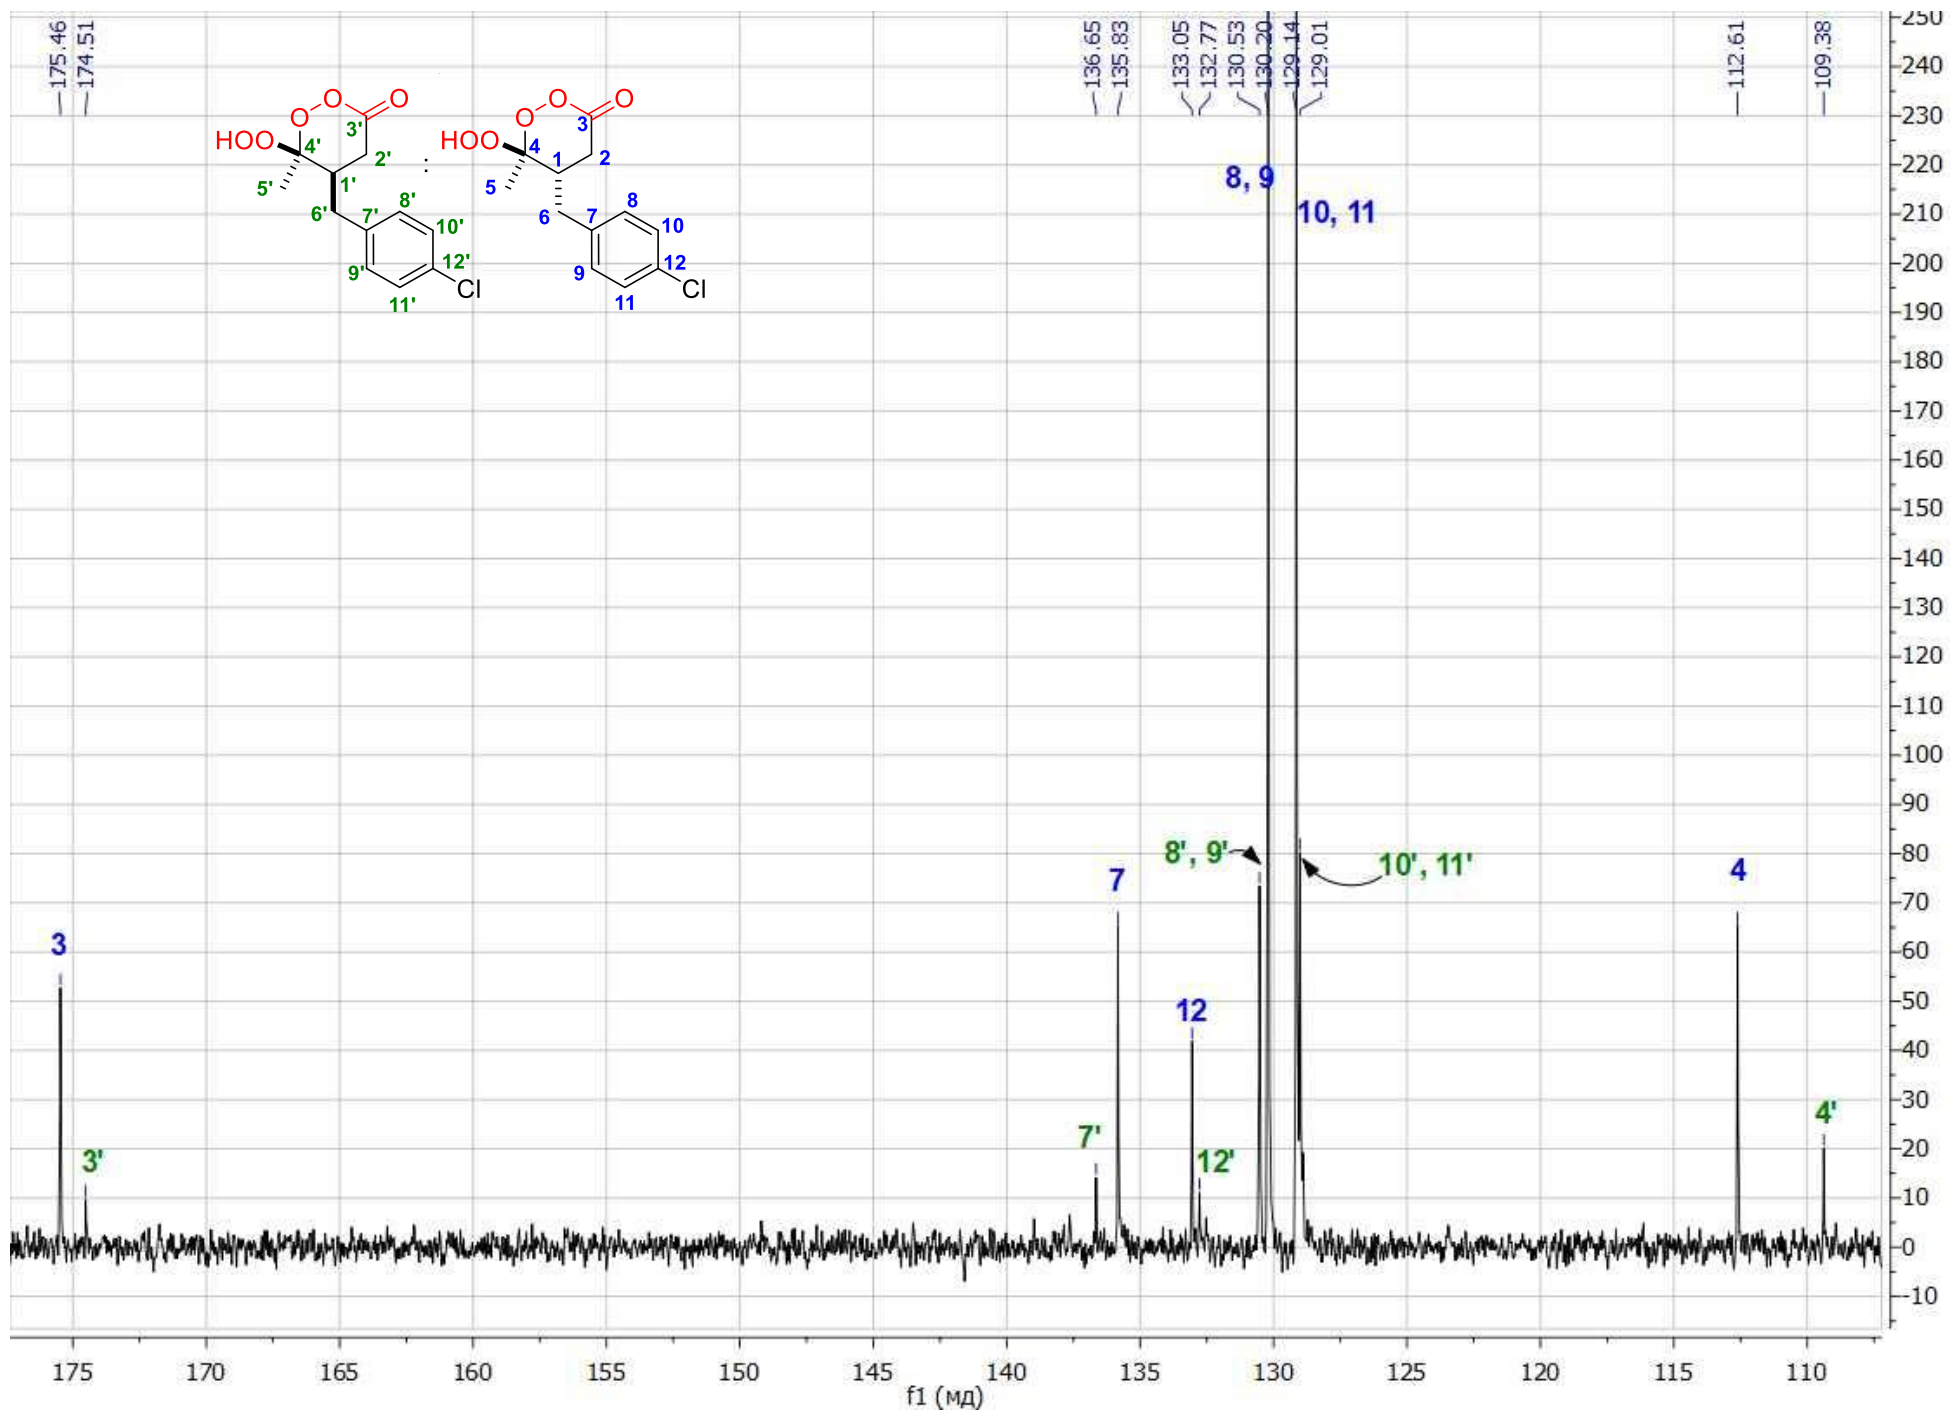

<sup>13</sup>C\_deptsp135

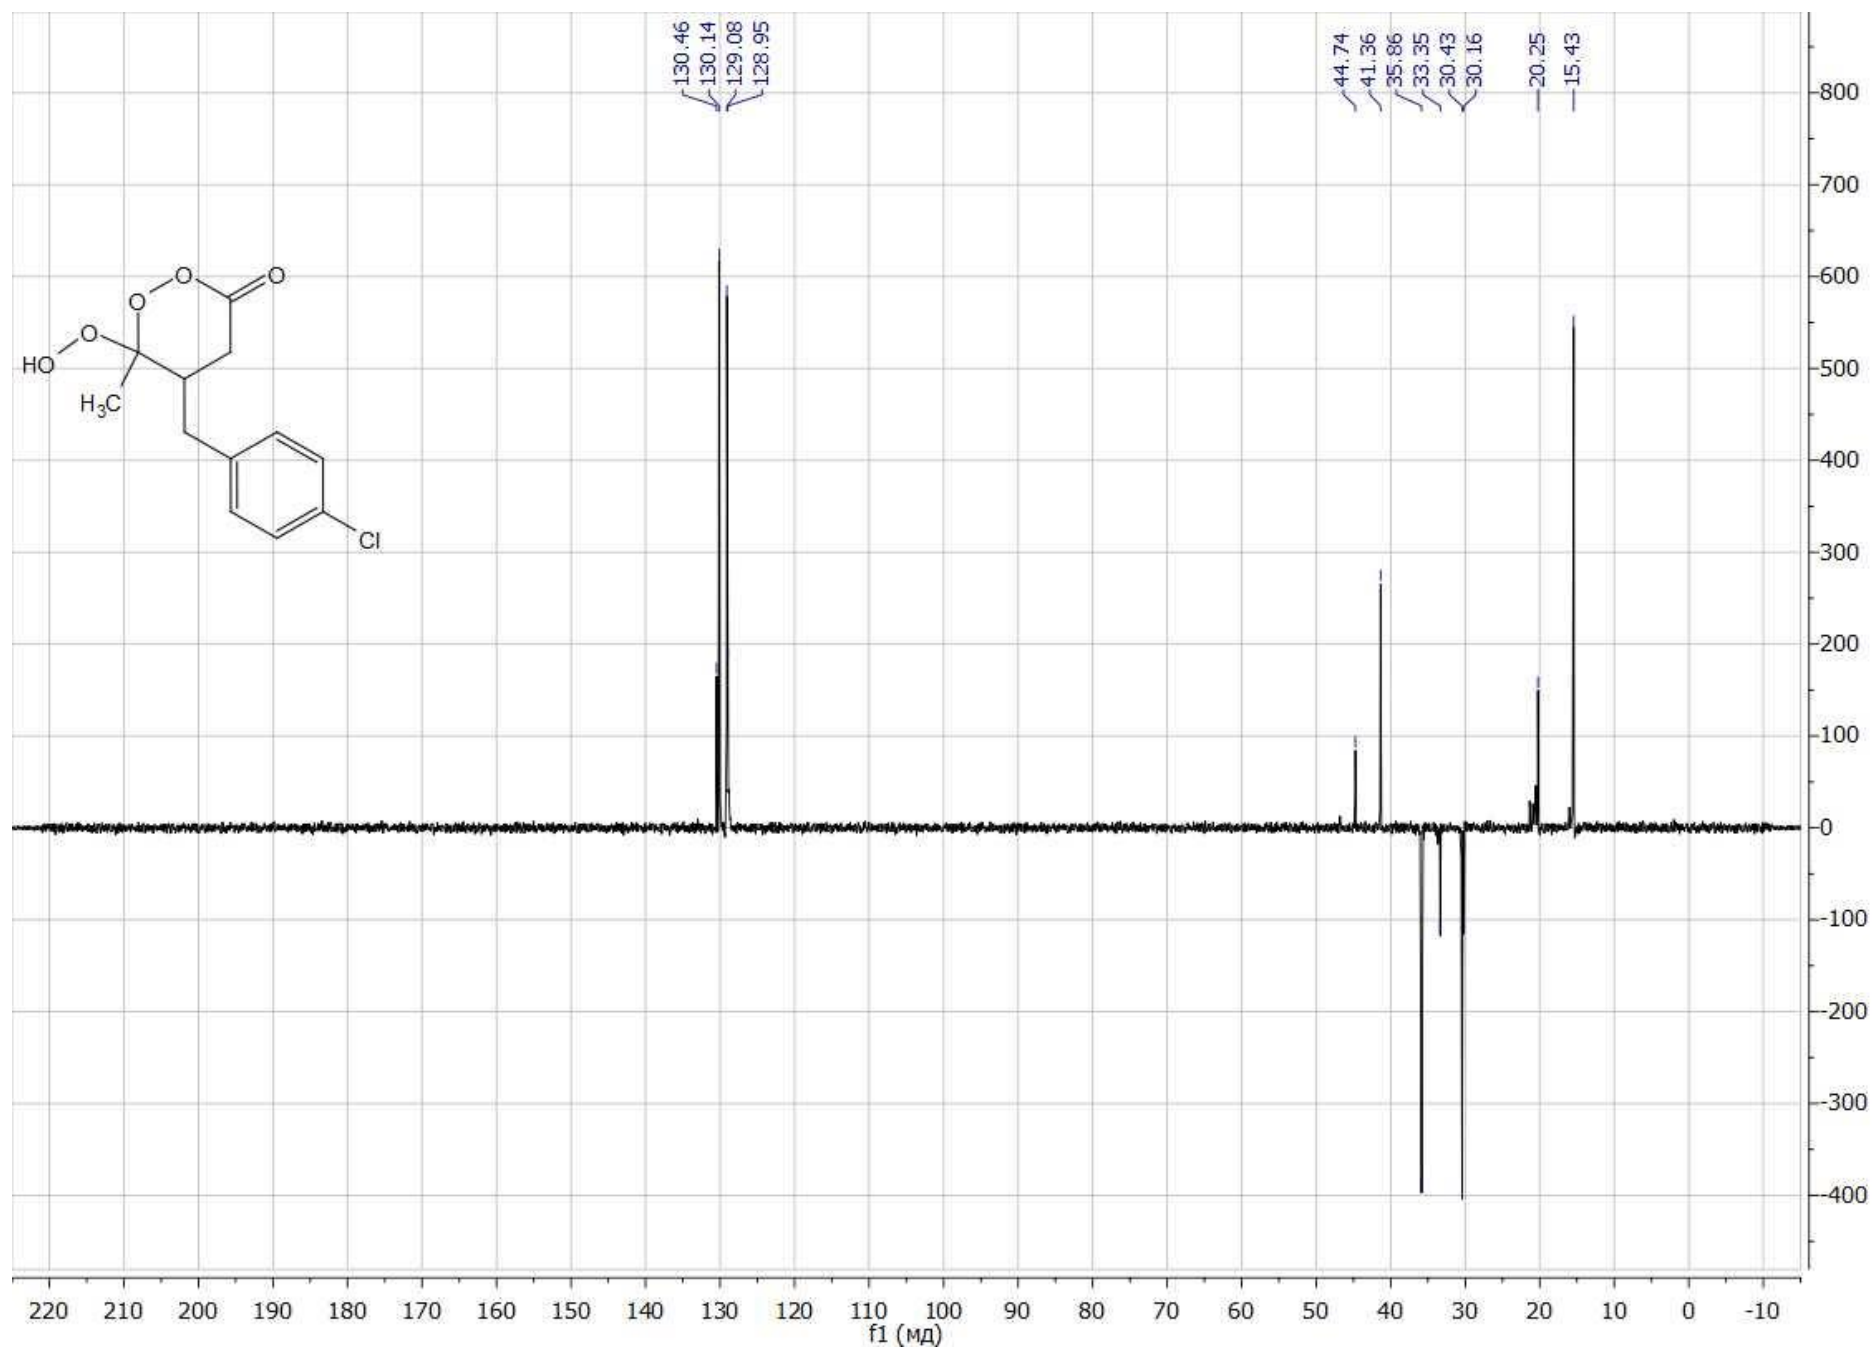



{<sup>1</sup>H-<sup>1</sup>H} COSY

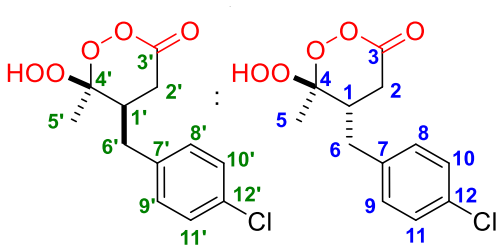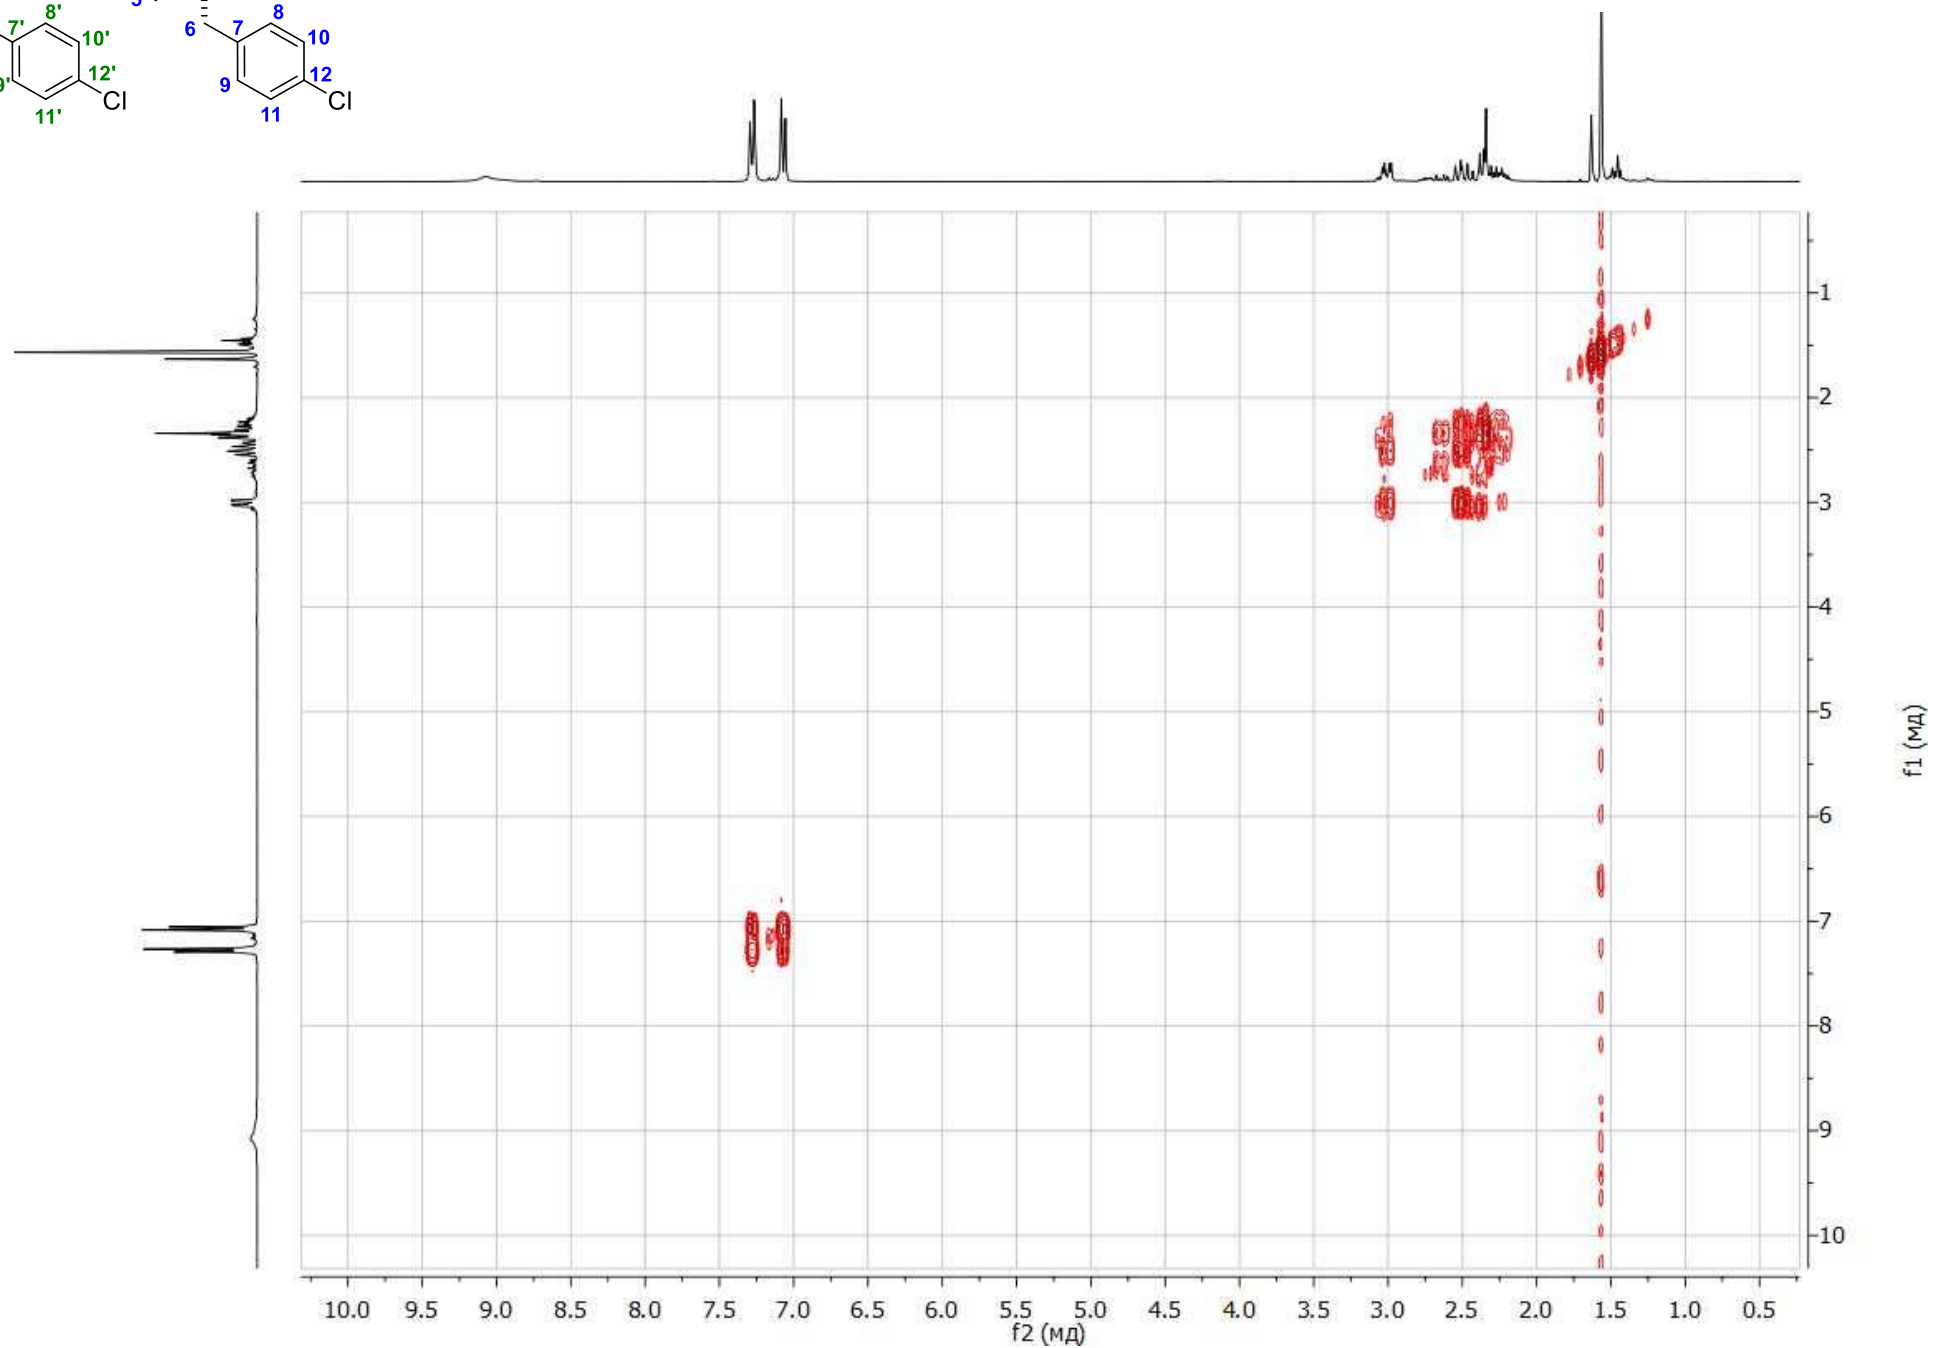

{<sup>1</sup>H-<sup>1</sup>H} NOESY

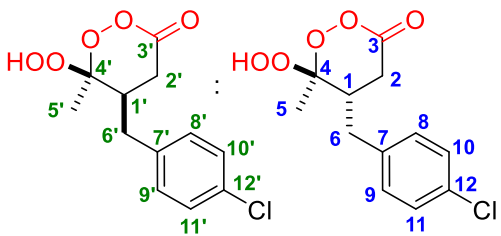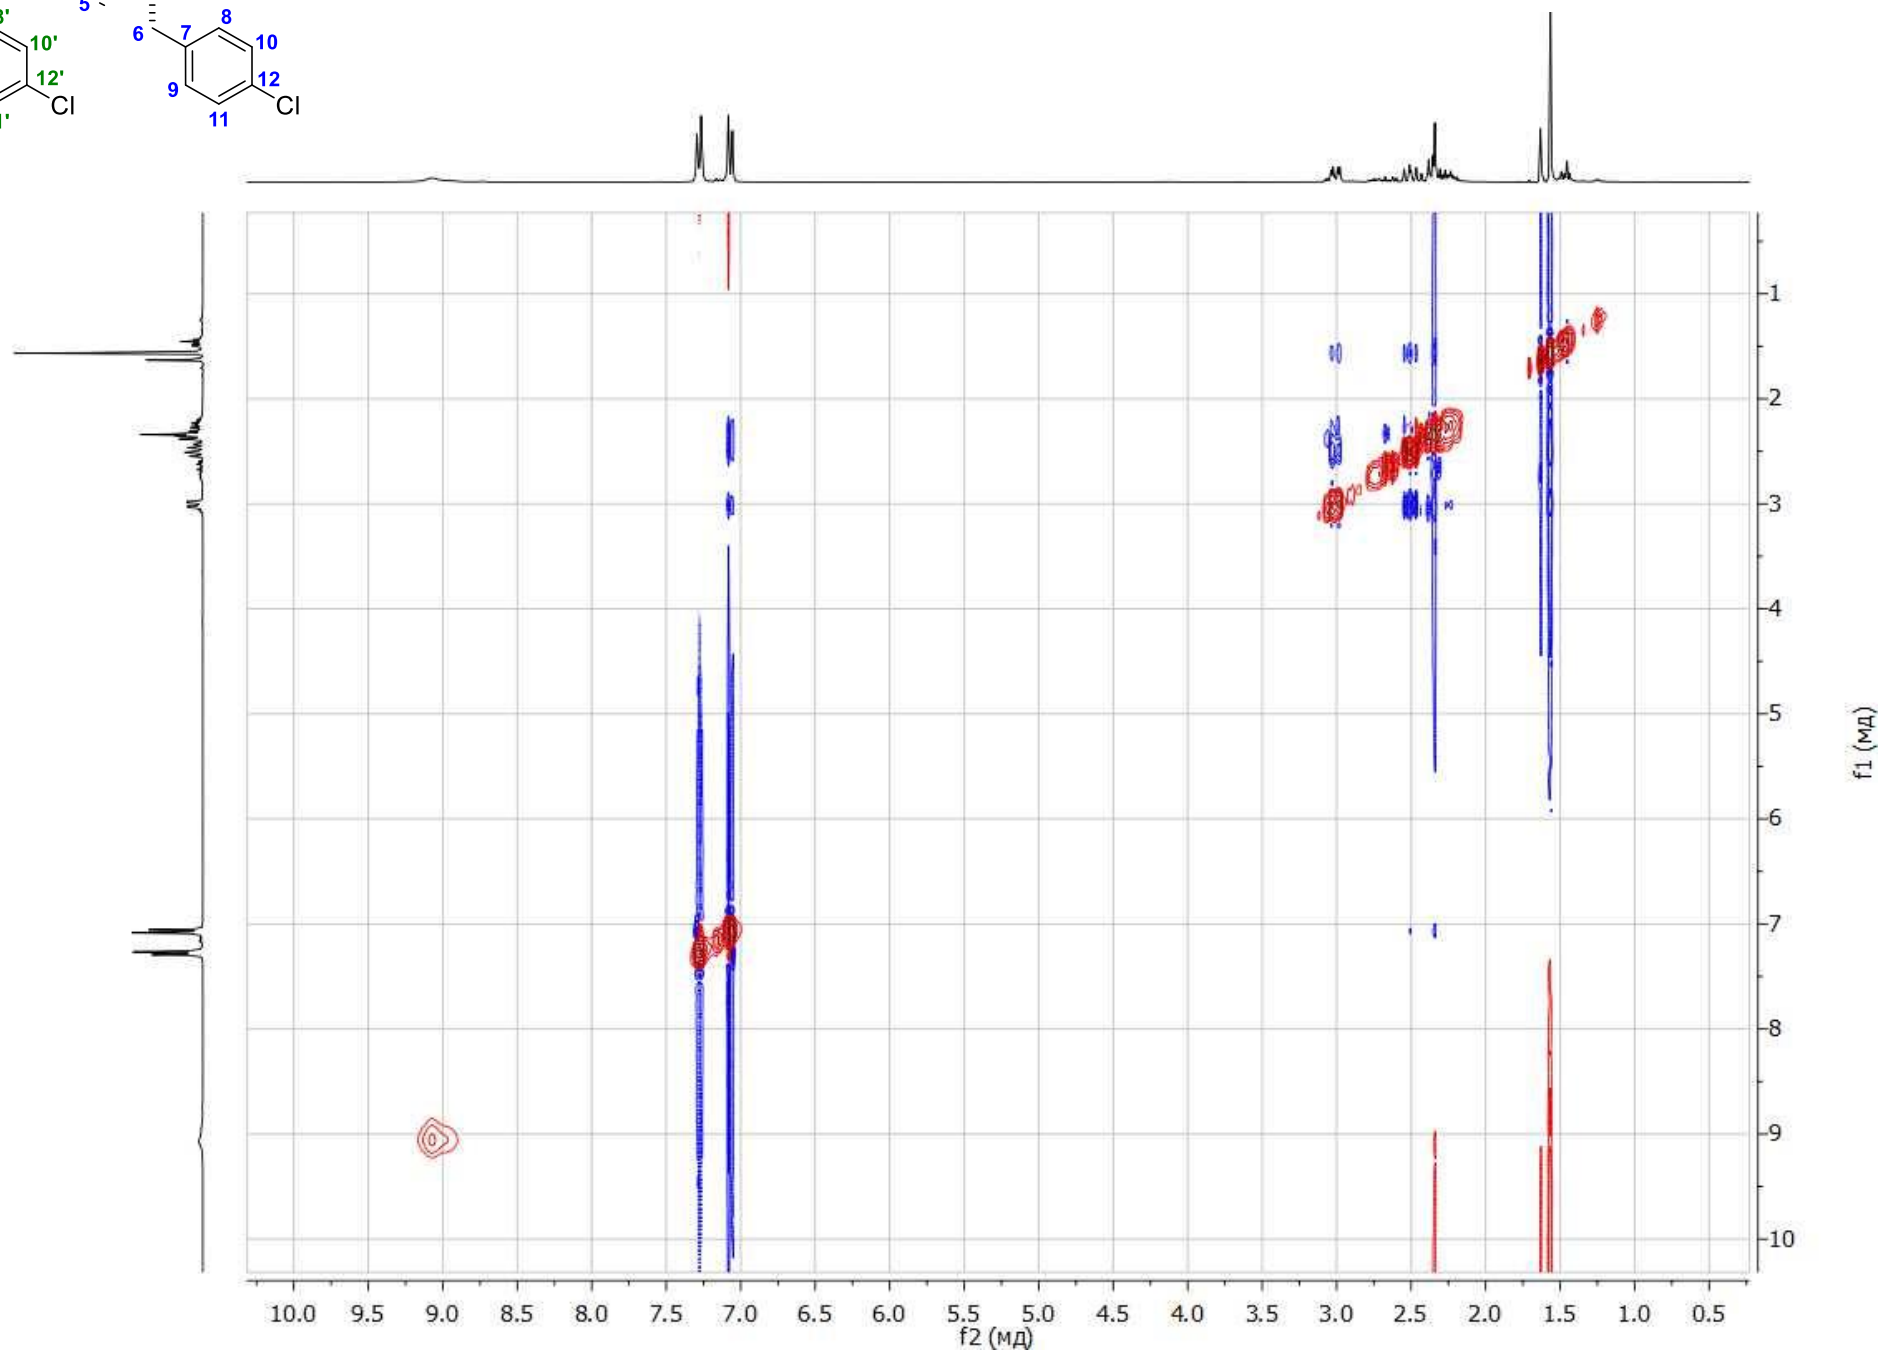

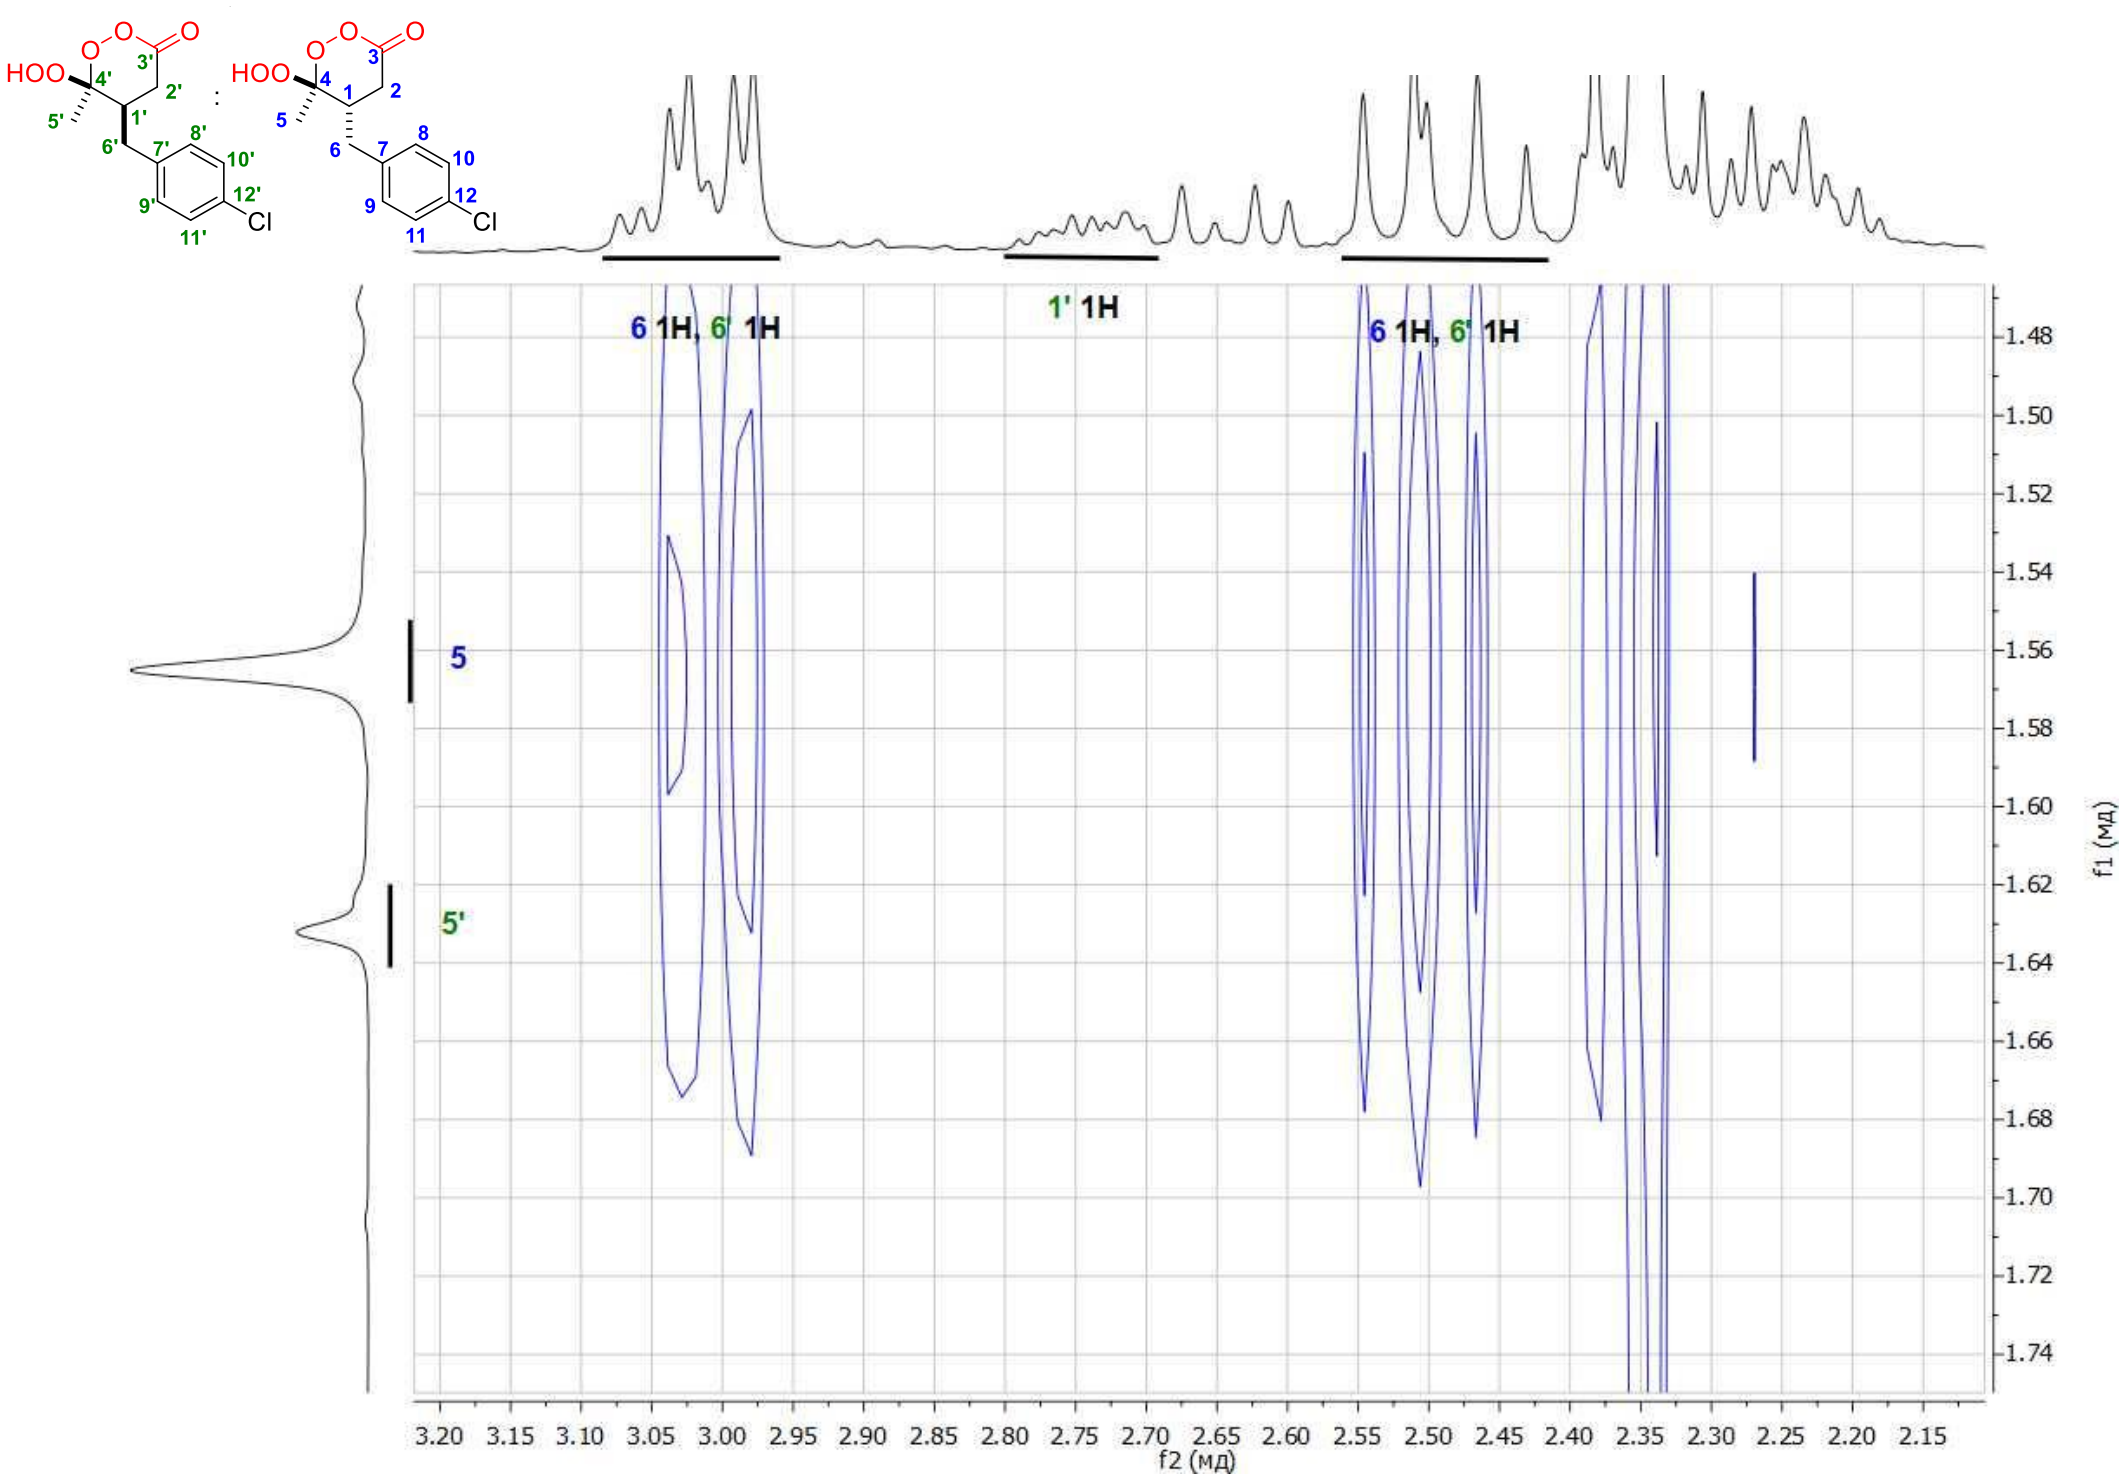

{<sup>1</sup>H-<sup>13</sup>C} HSQC

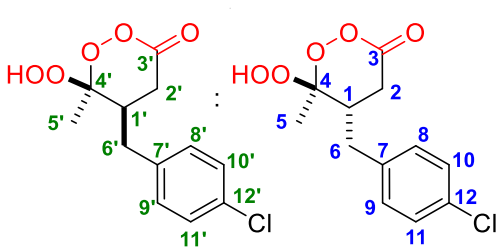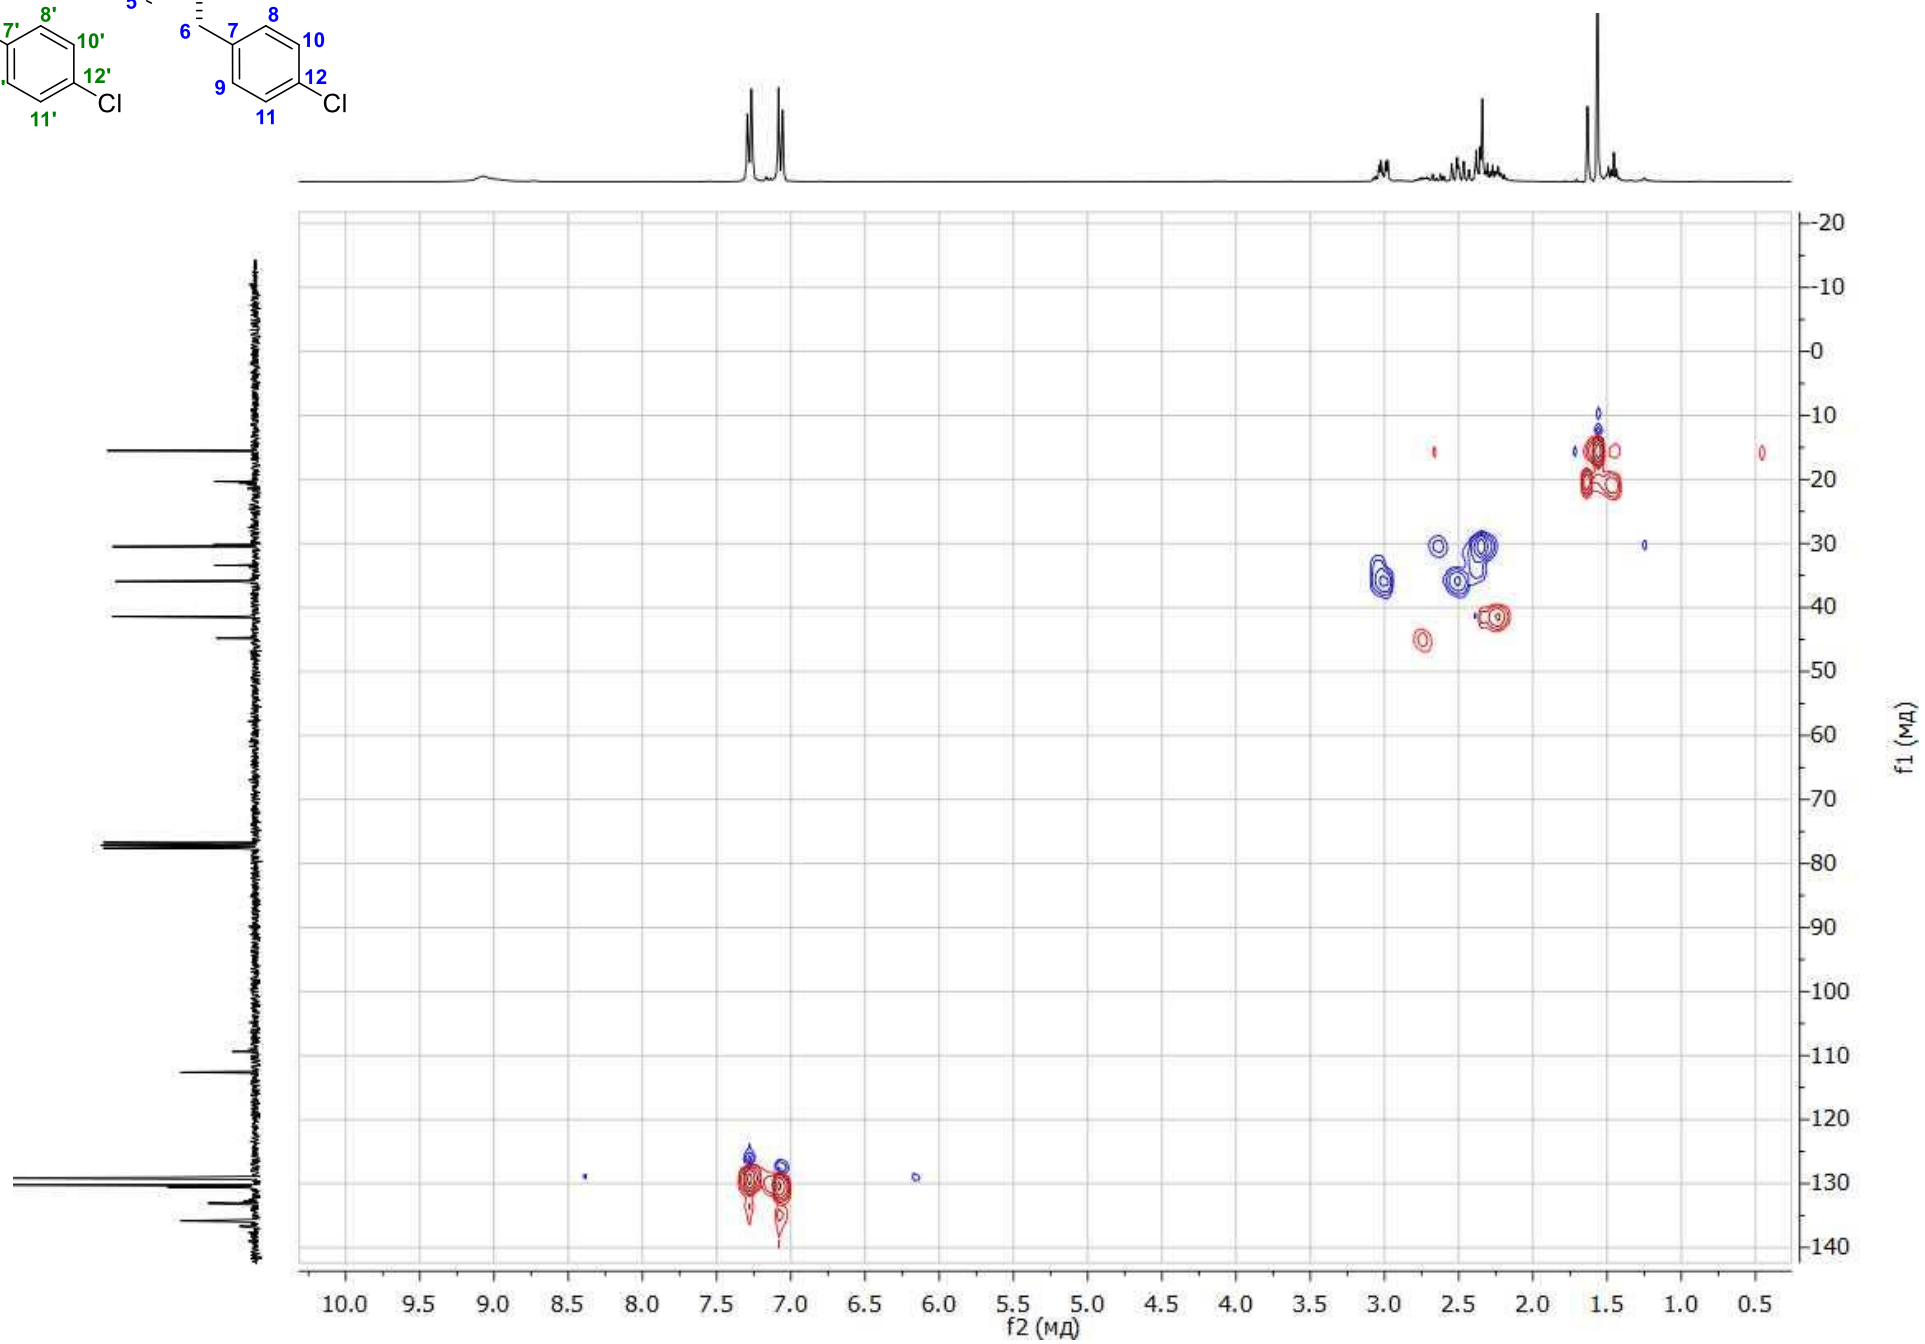

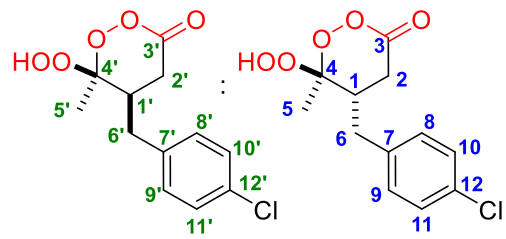

{<sup>1</sup>H-<sup>13</sup>C} HMBC

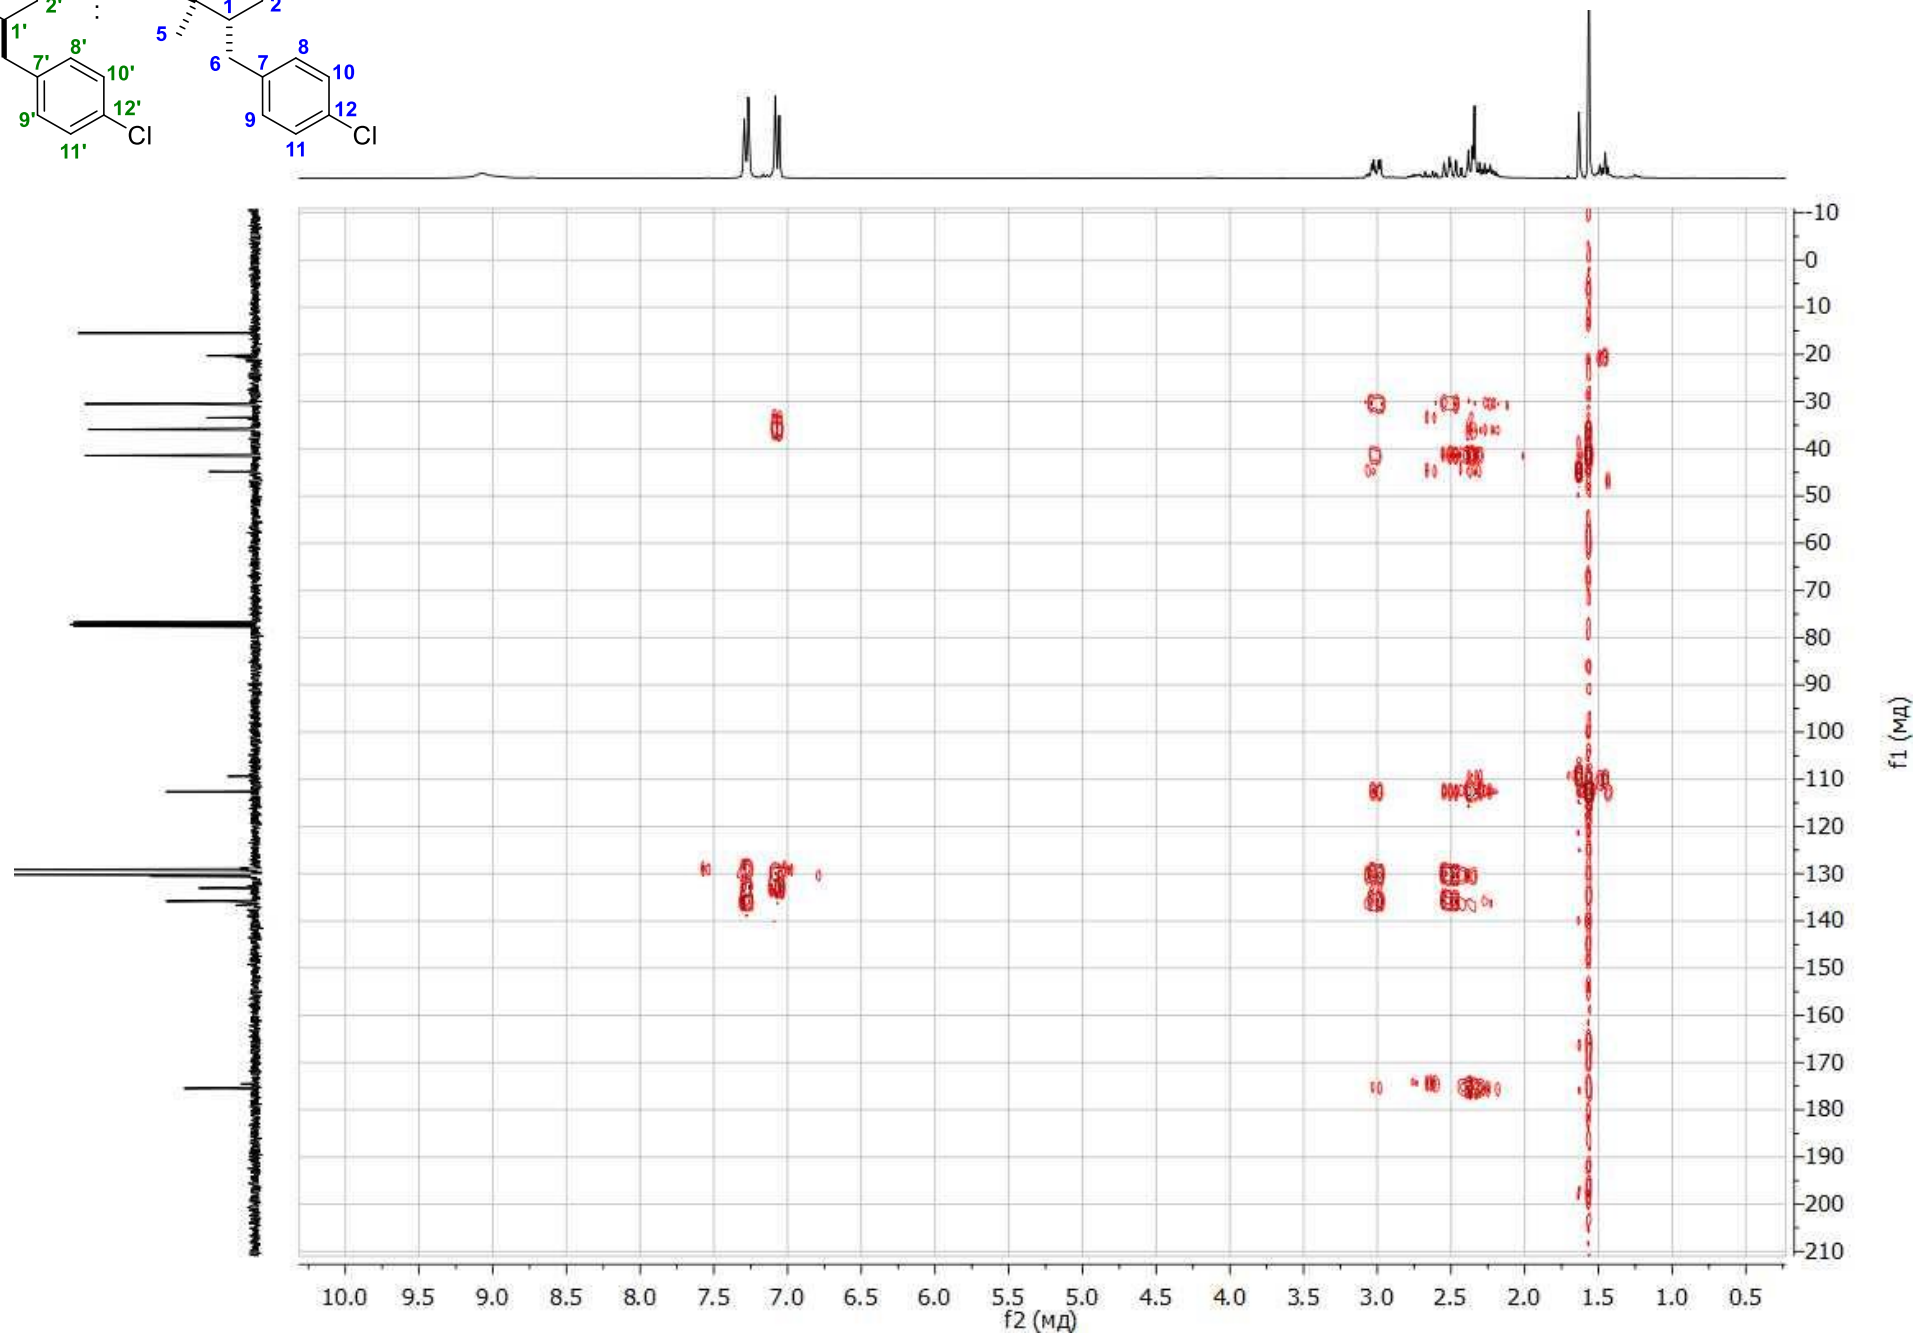

5-(4-Bromobenzyl)-6-hydroperoxy-6-methyl-1,2-dioxan-3-one, 2d

<sup>1</sup>H NMR

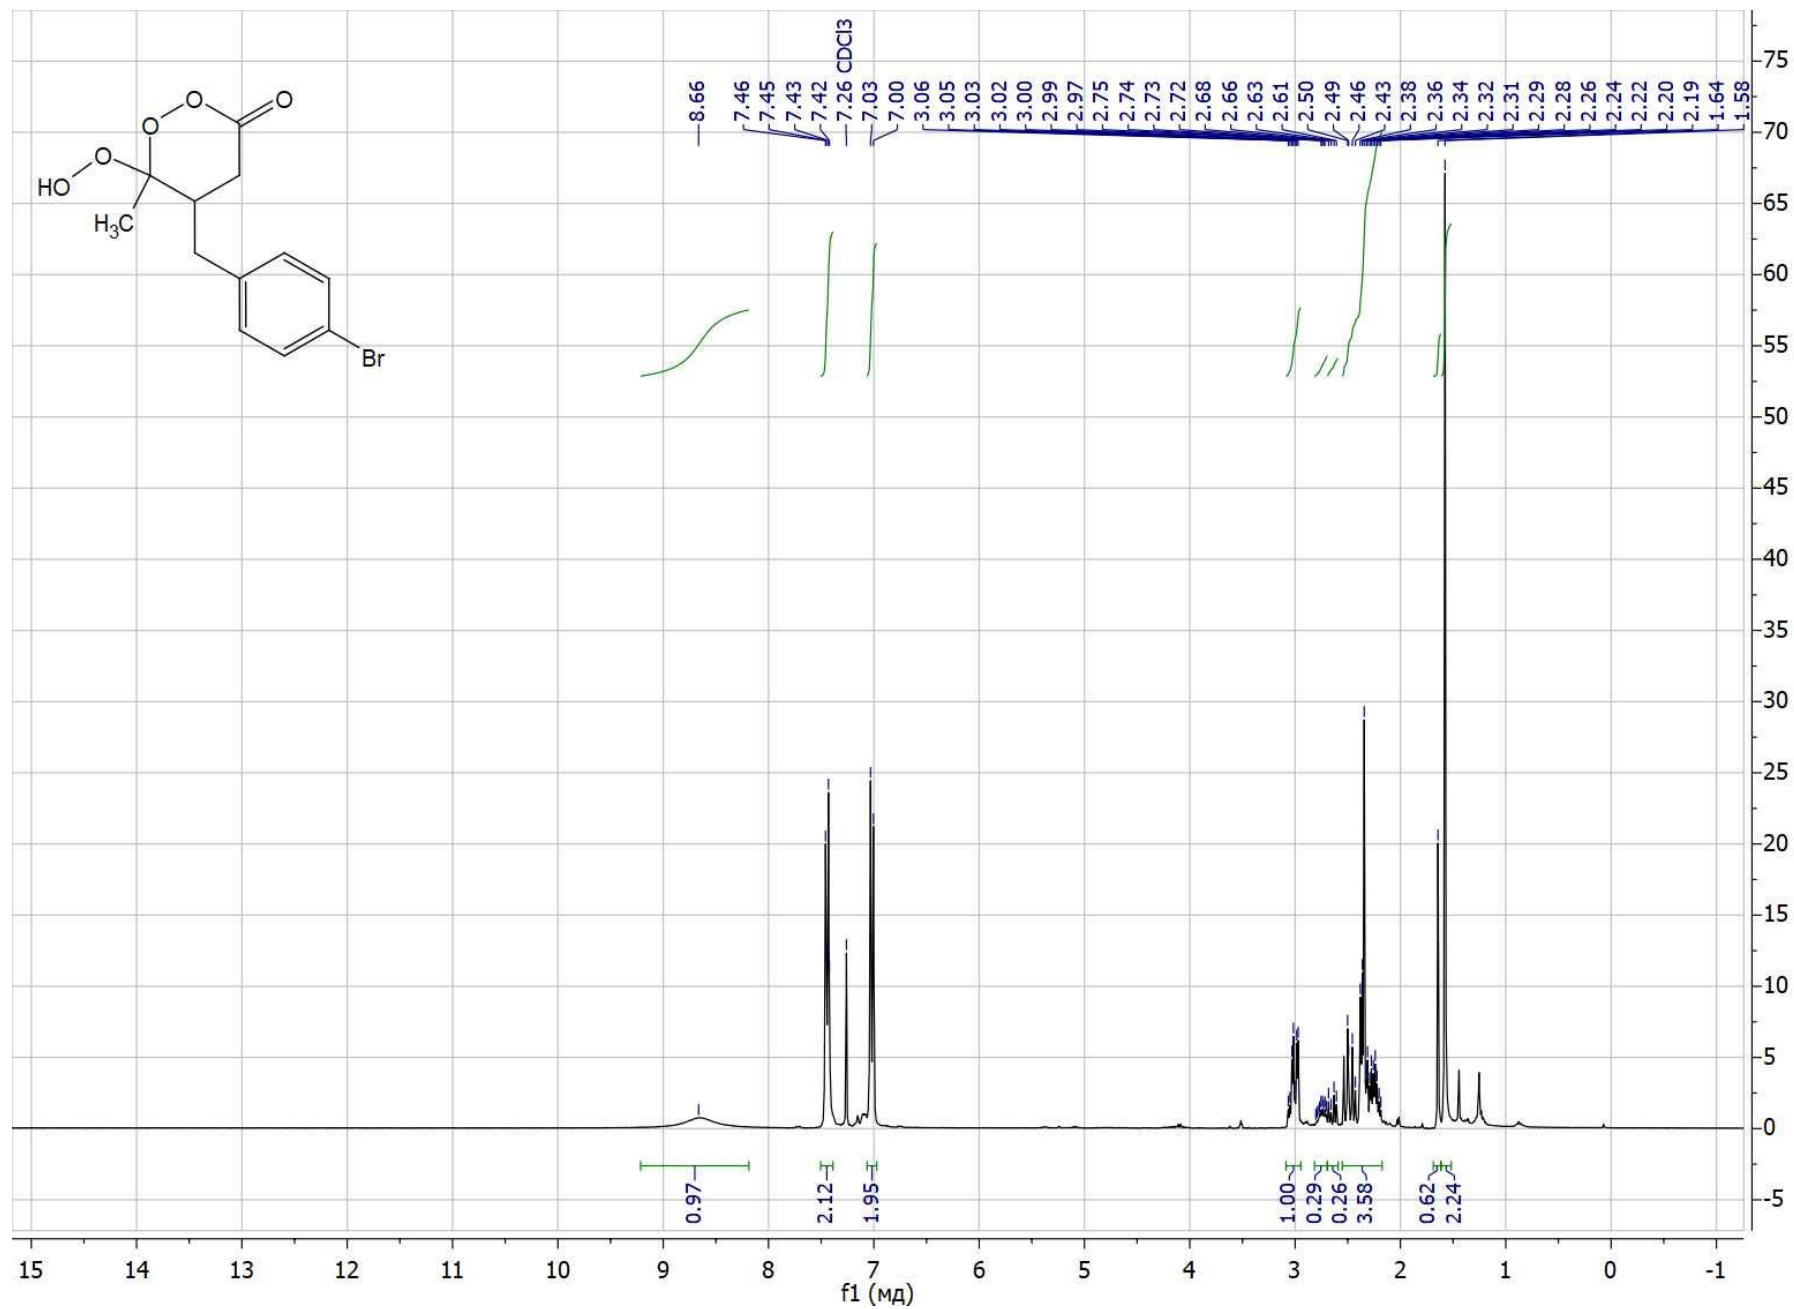

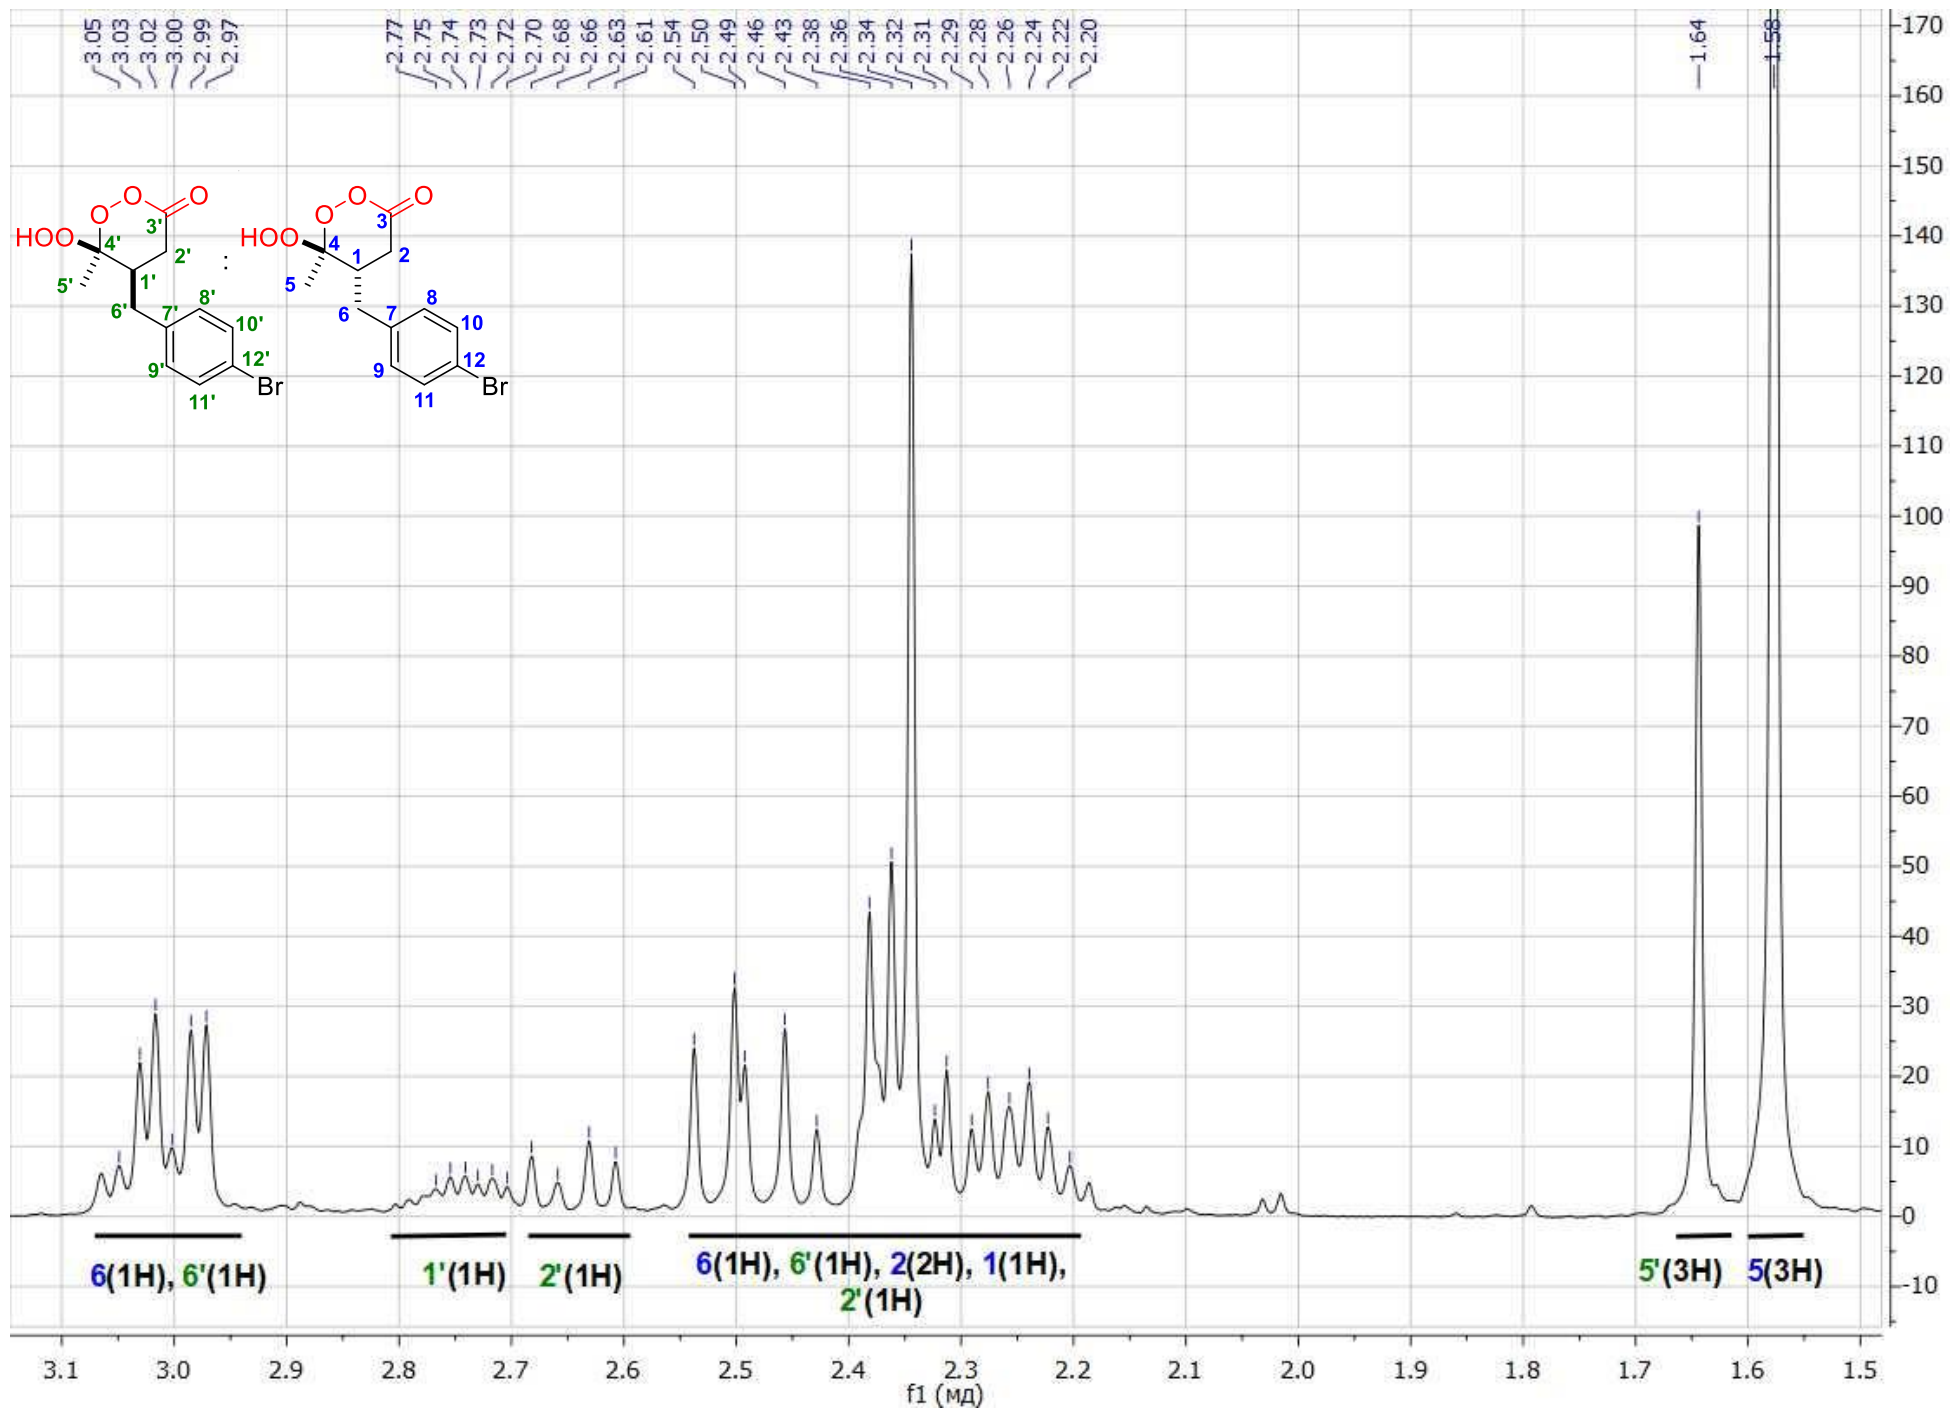

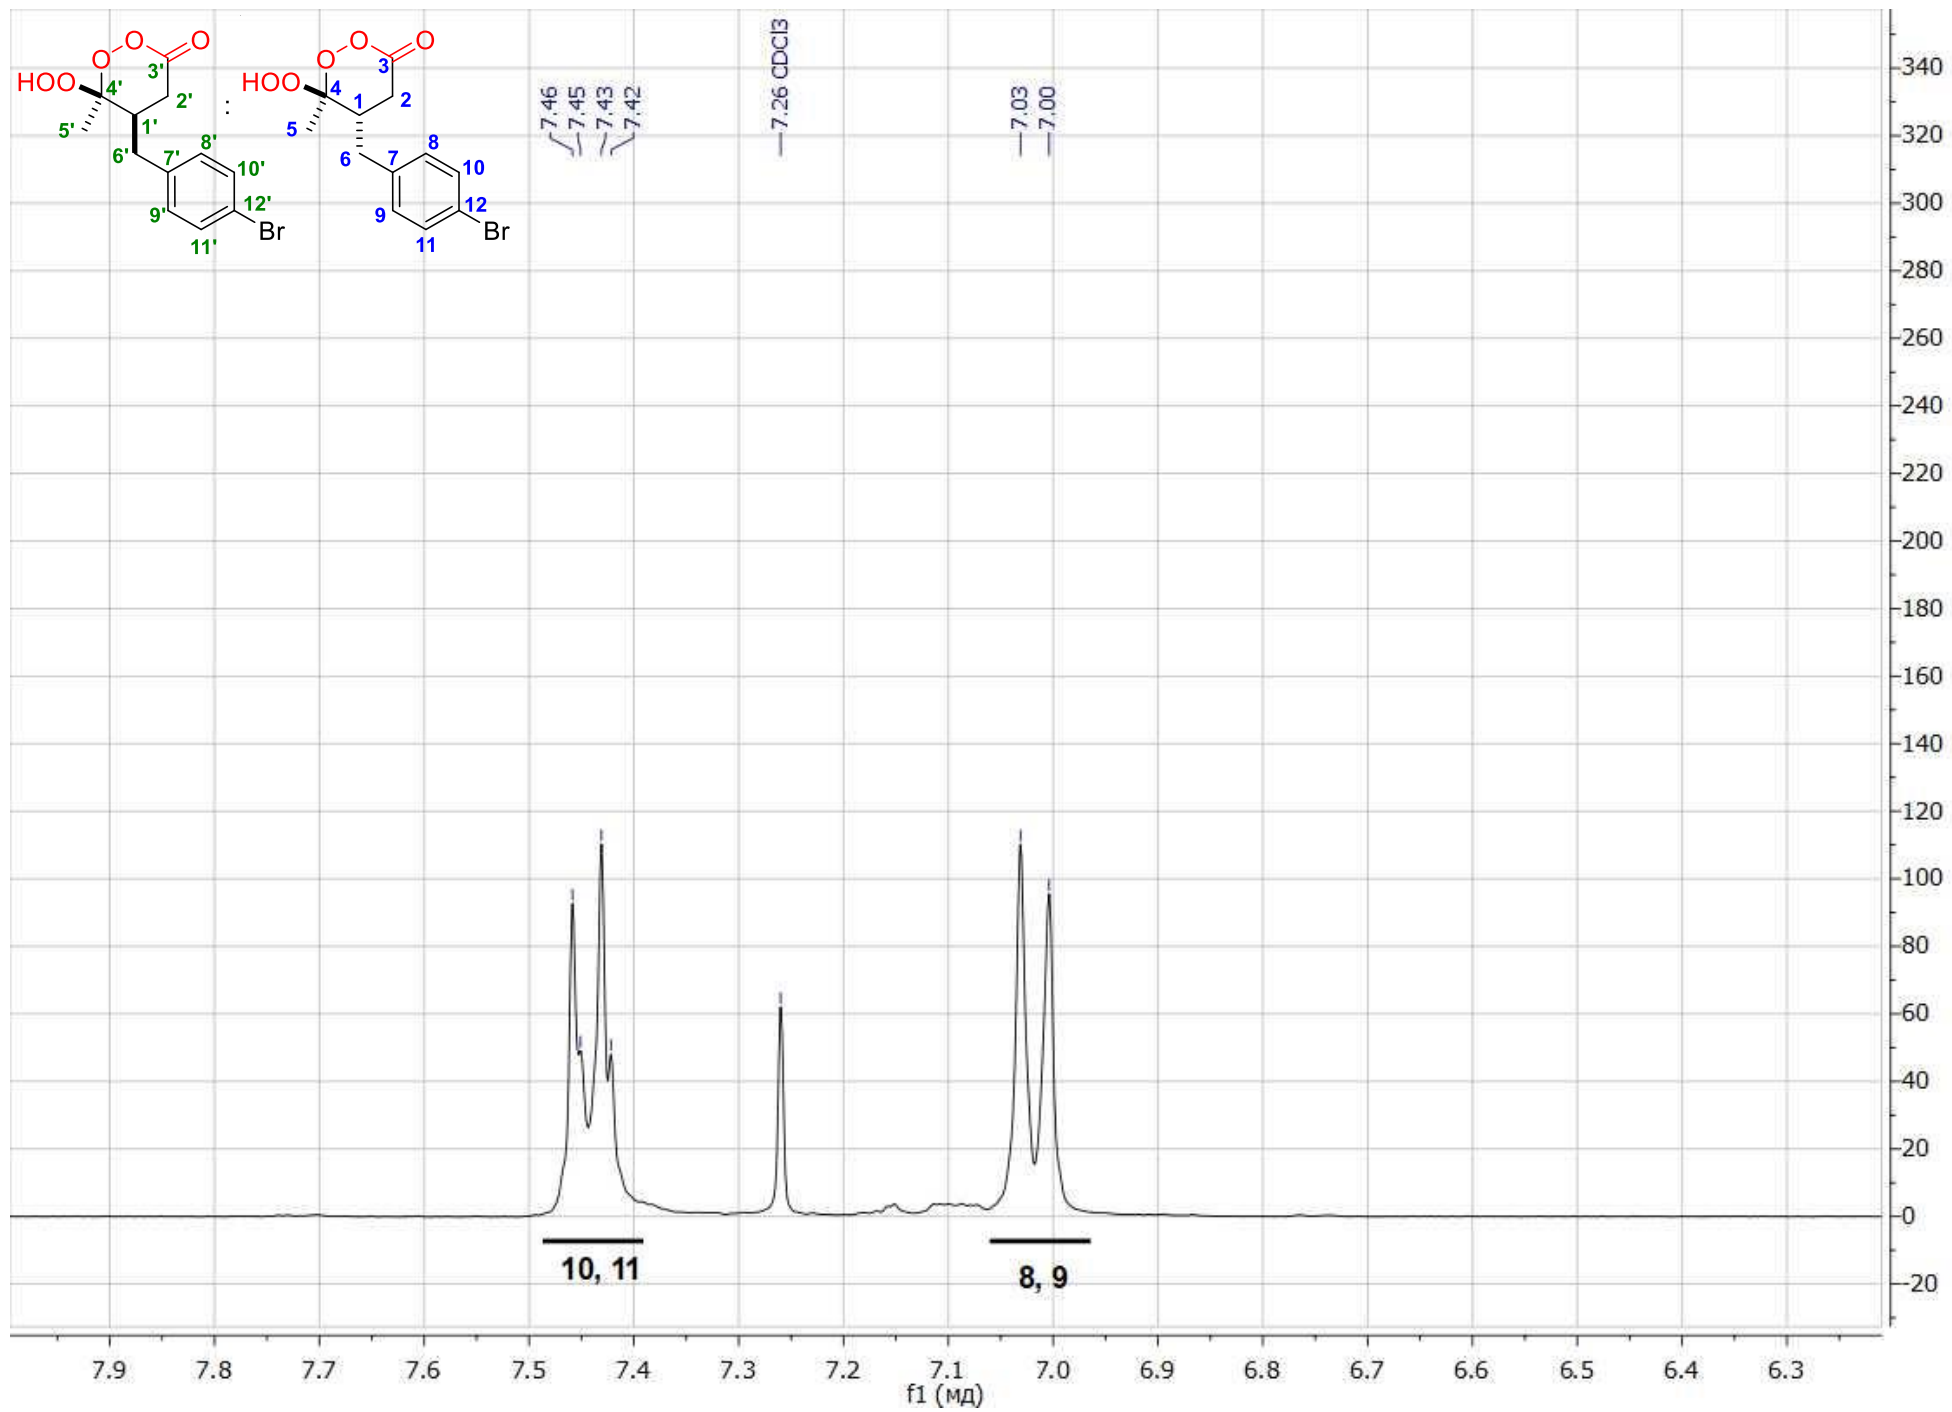



<sup>13</sup>C NMR

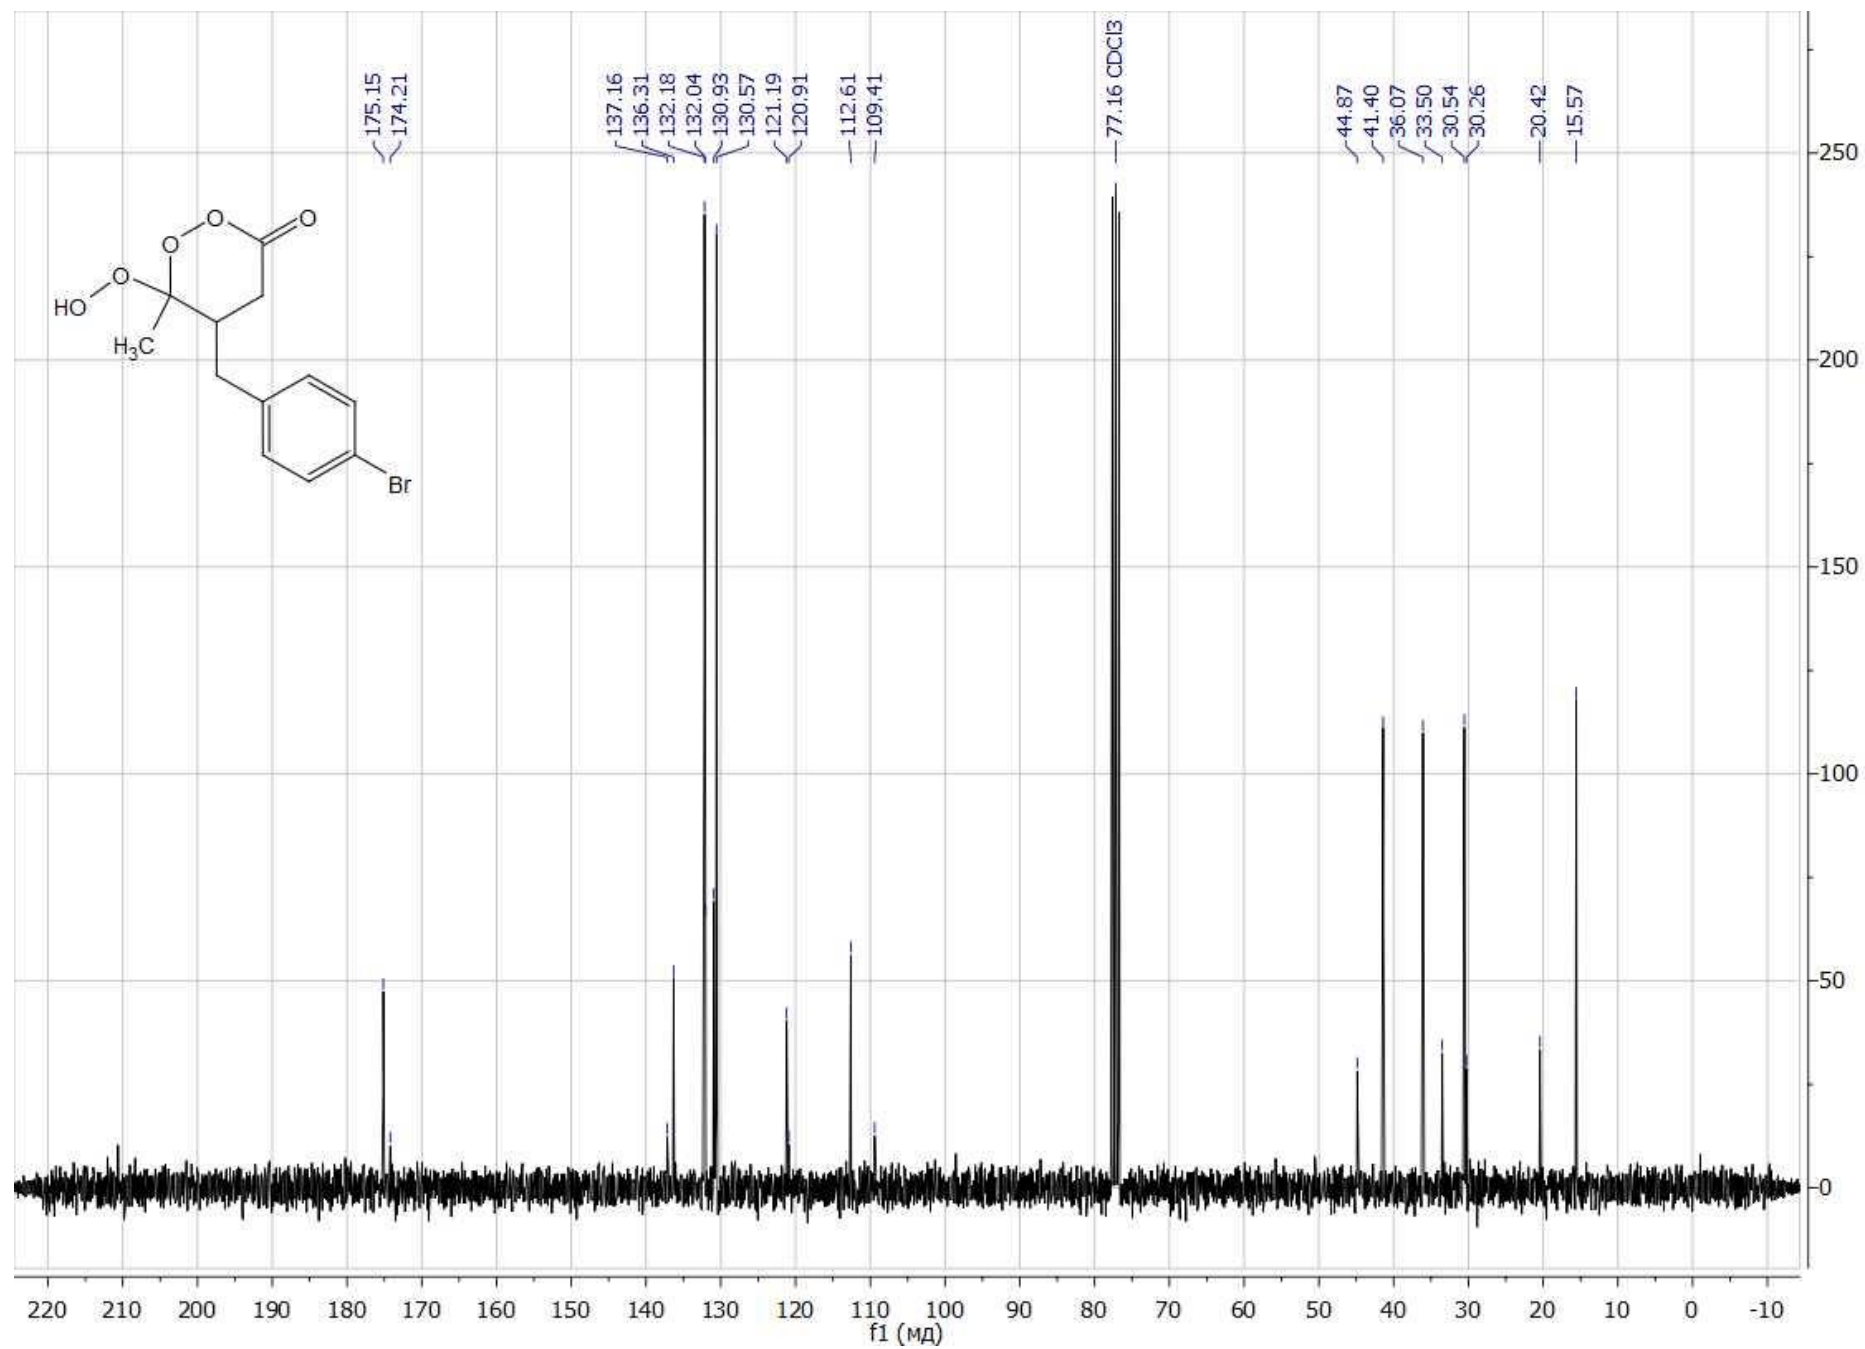

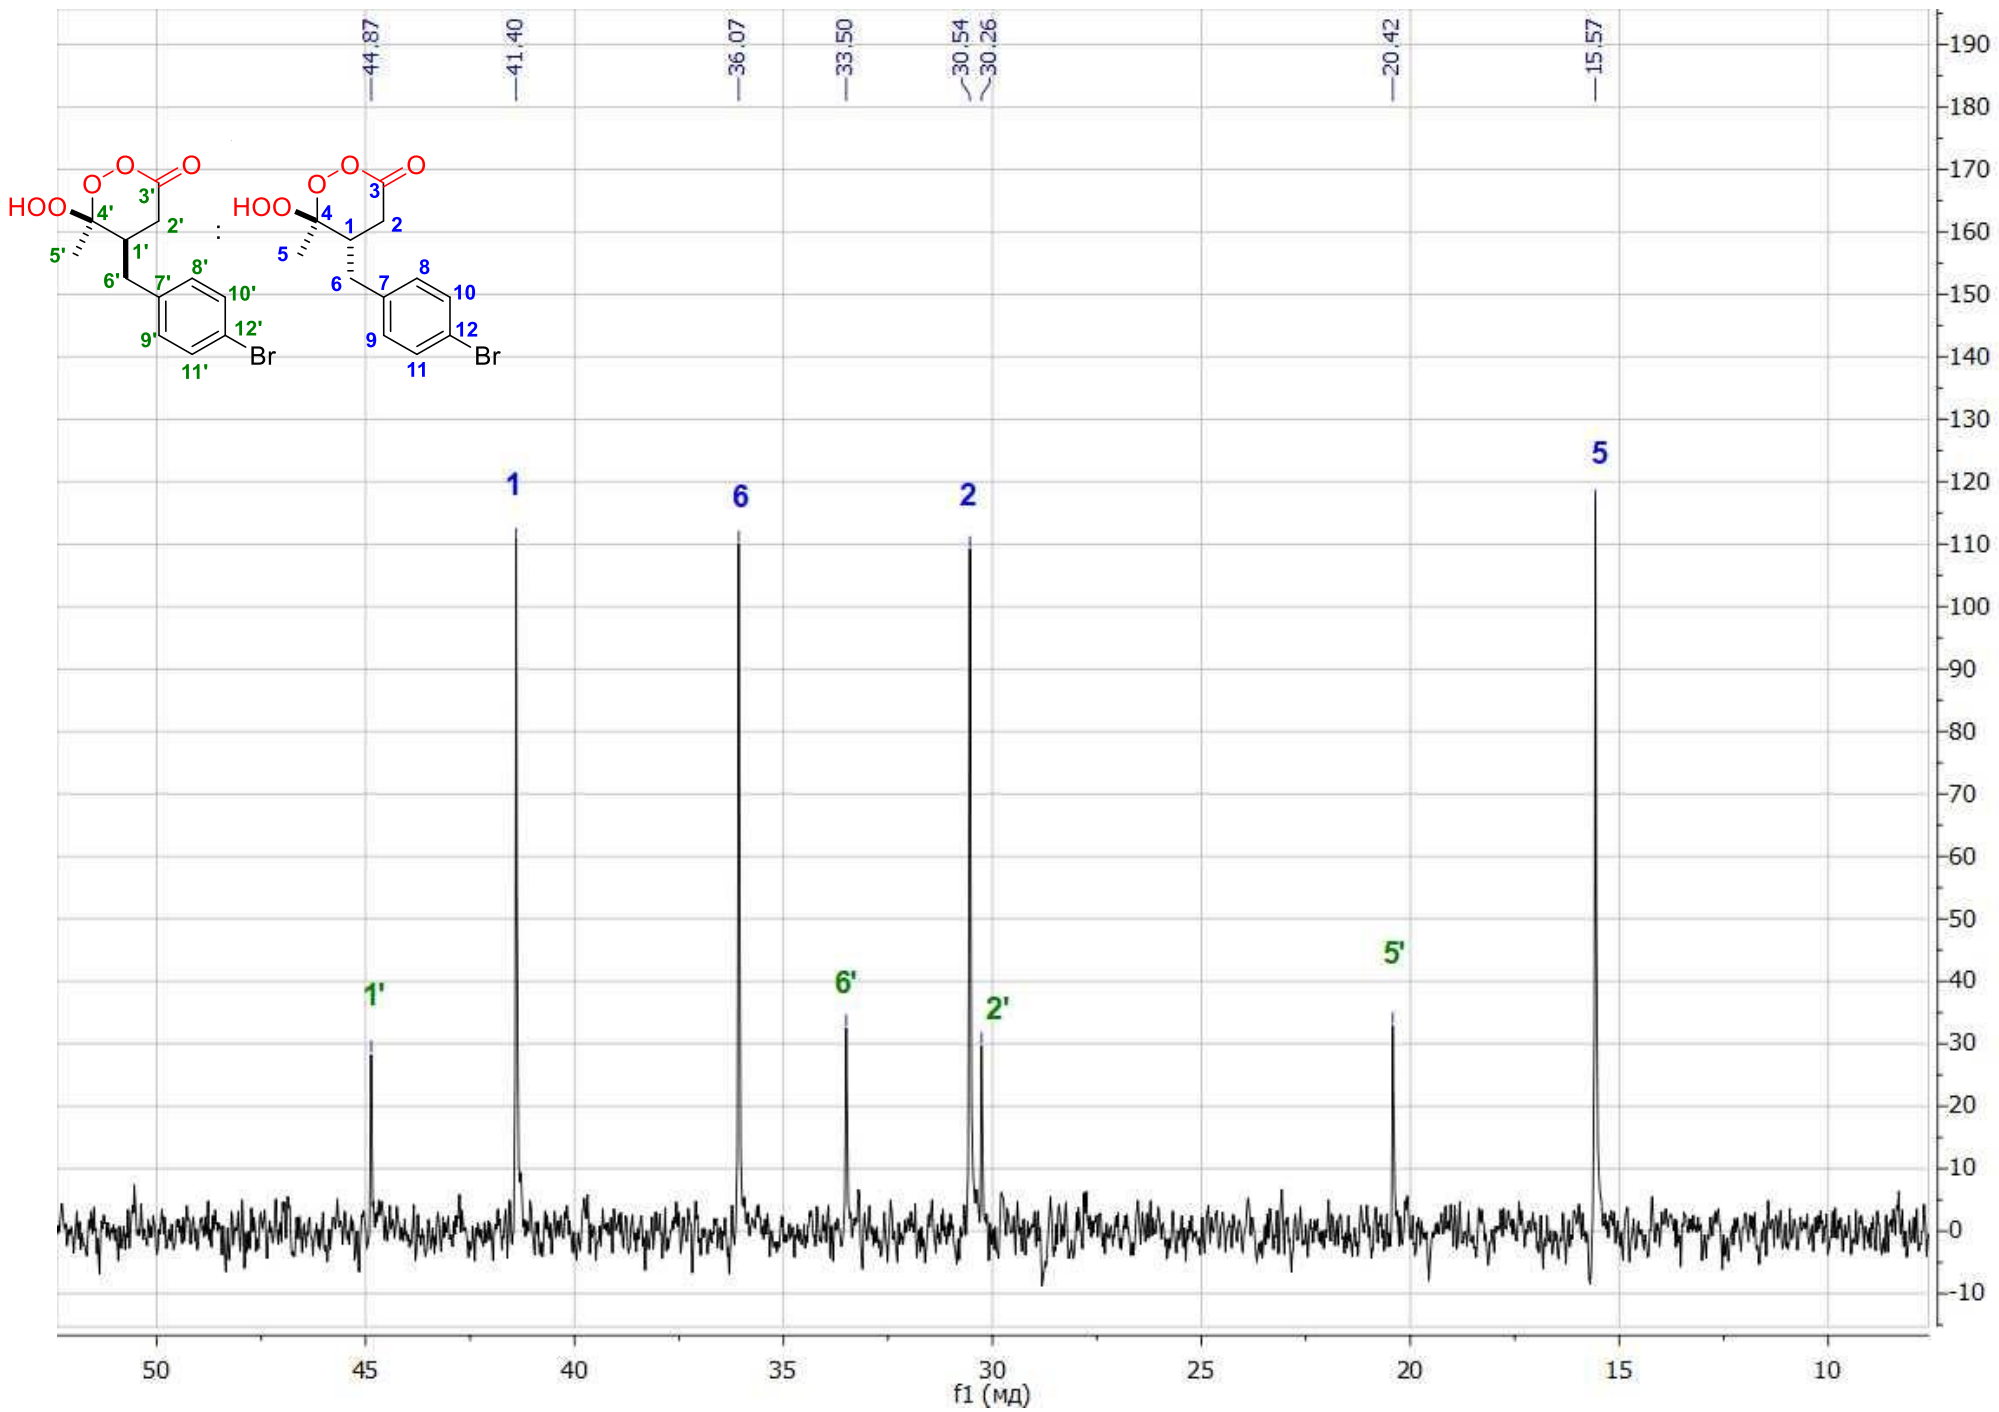

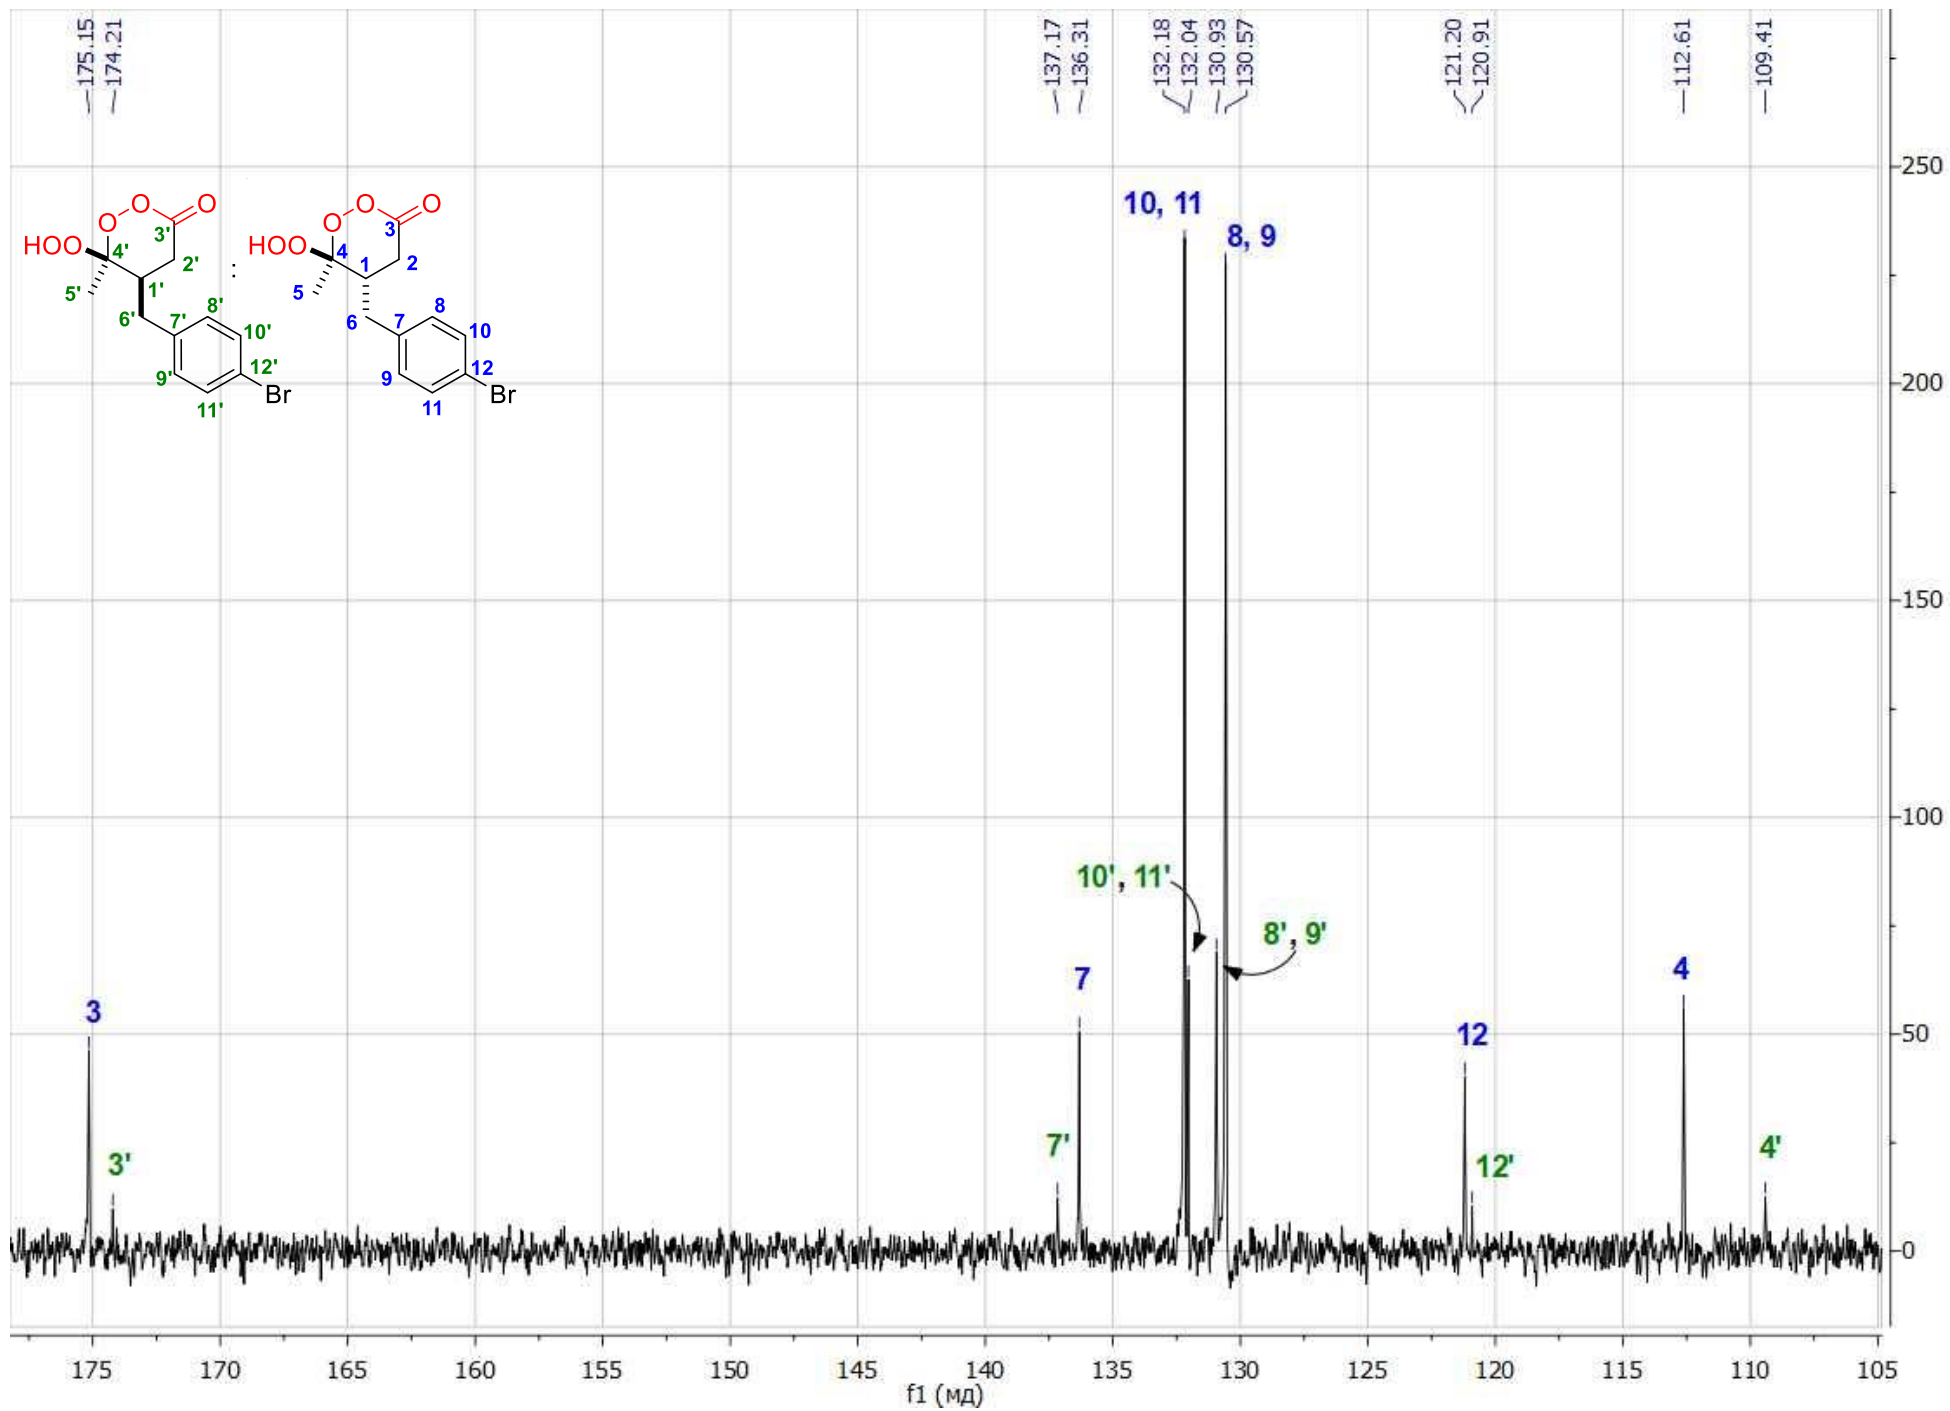

<sup>13</sup>C\_deptsp135

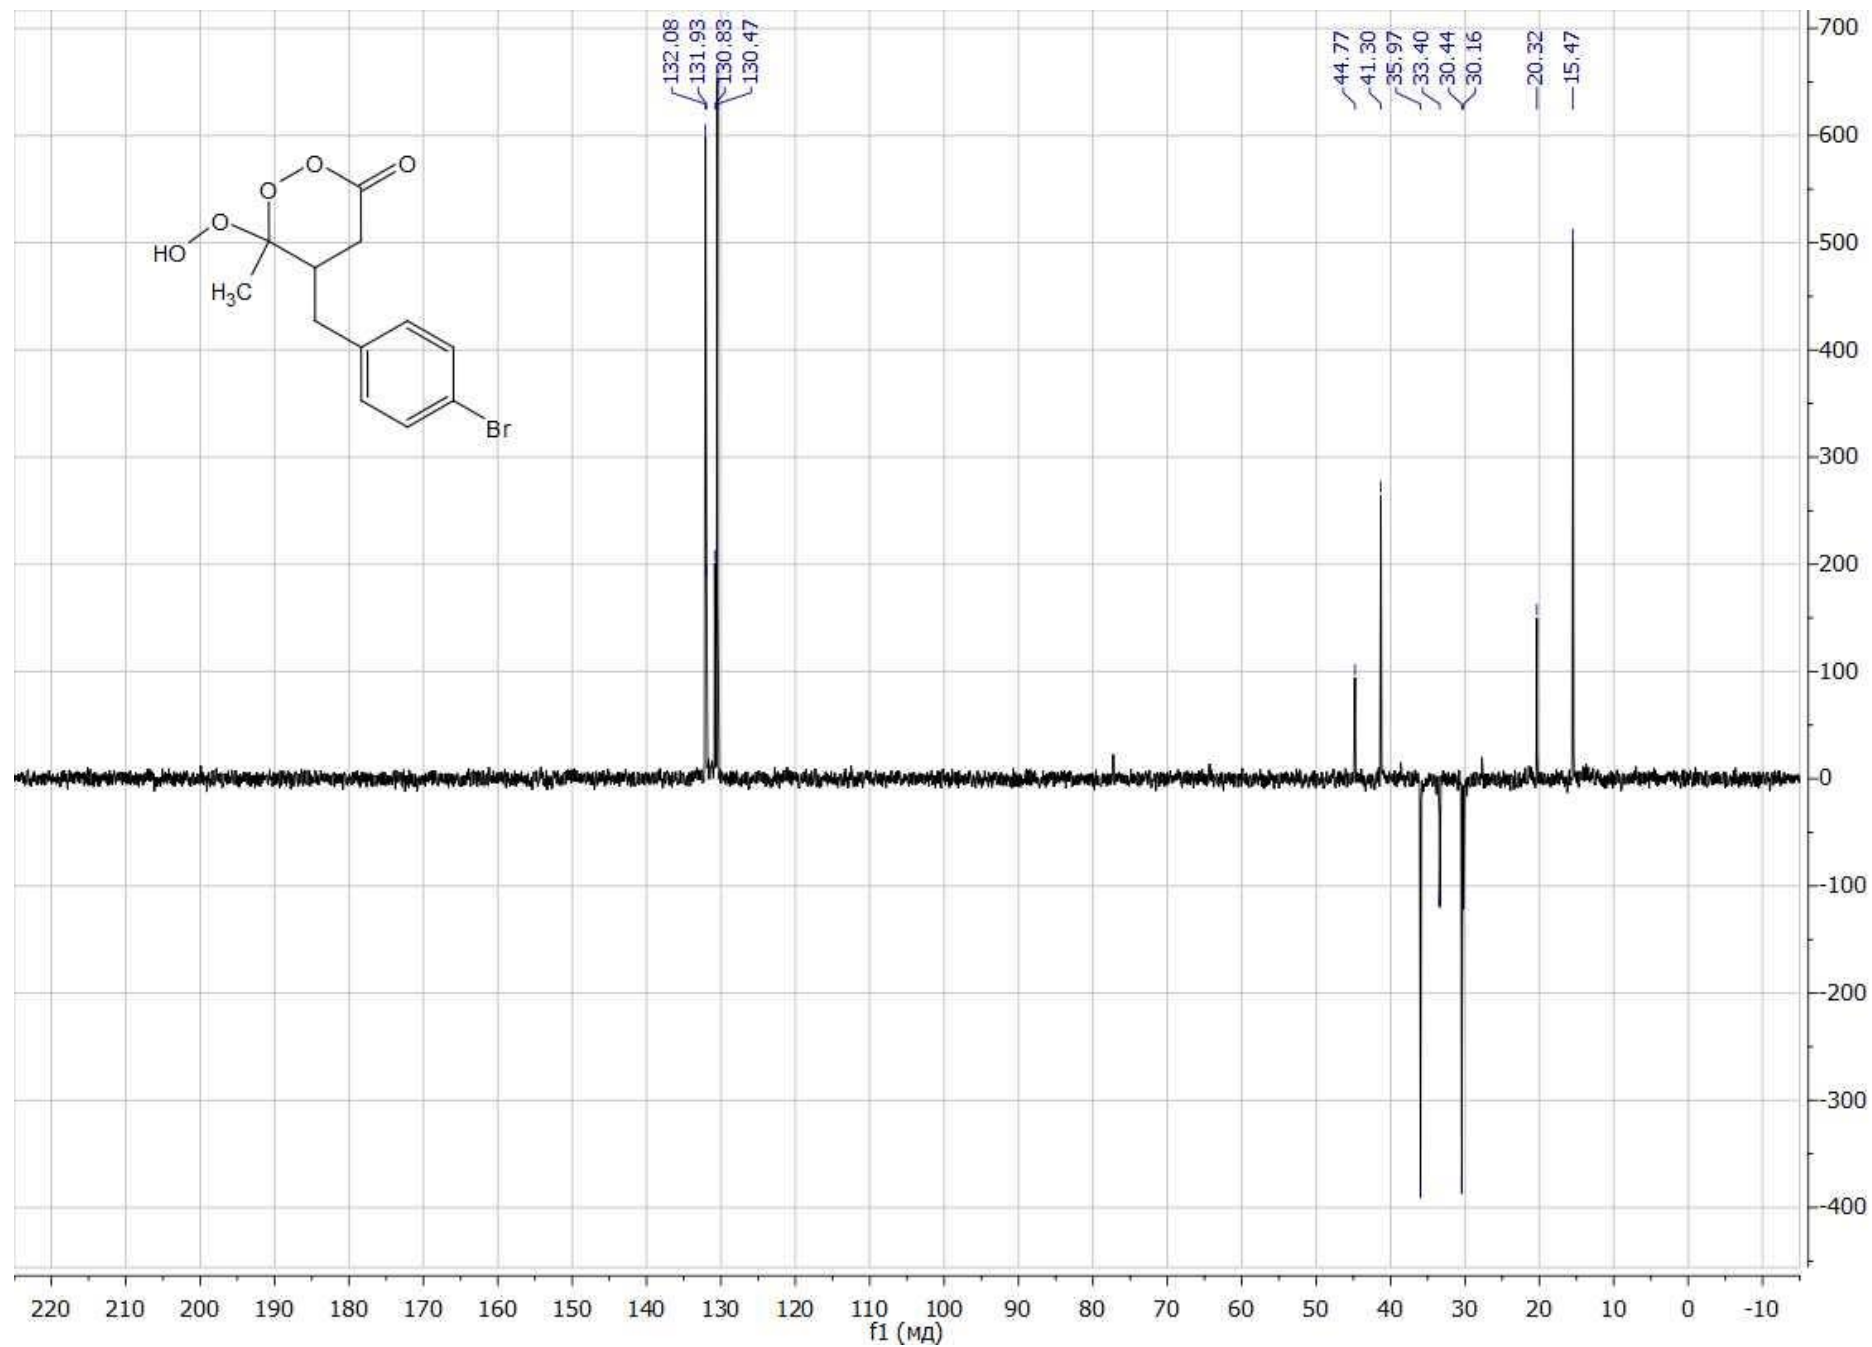

{<sup>1</sup>H-<sup>1</sup>H} COSY

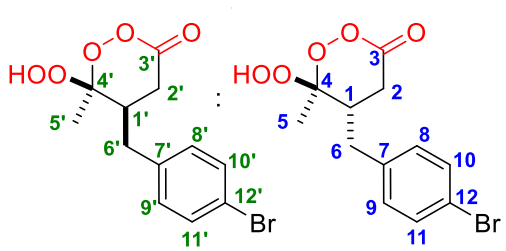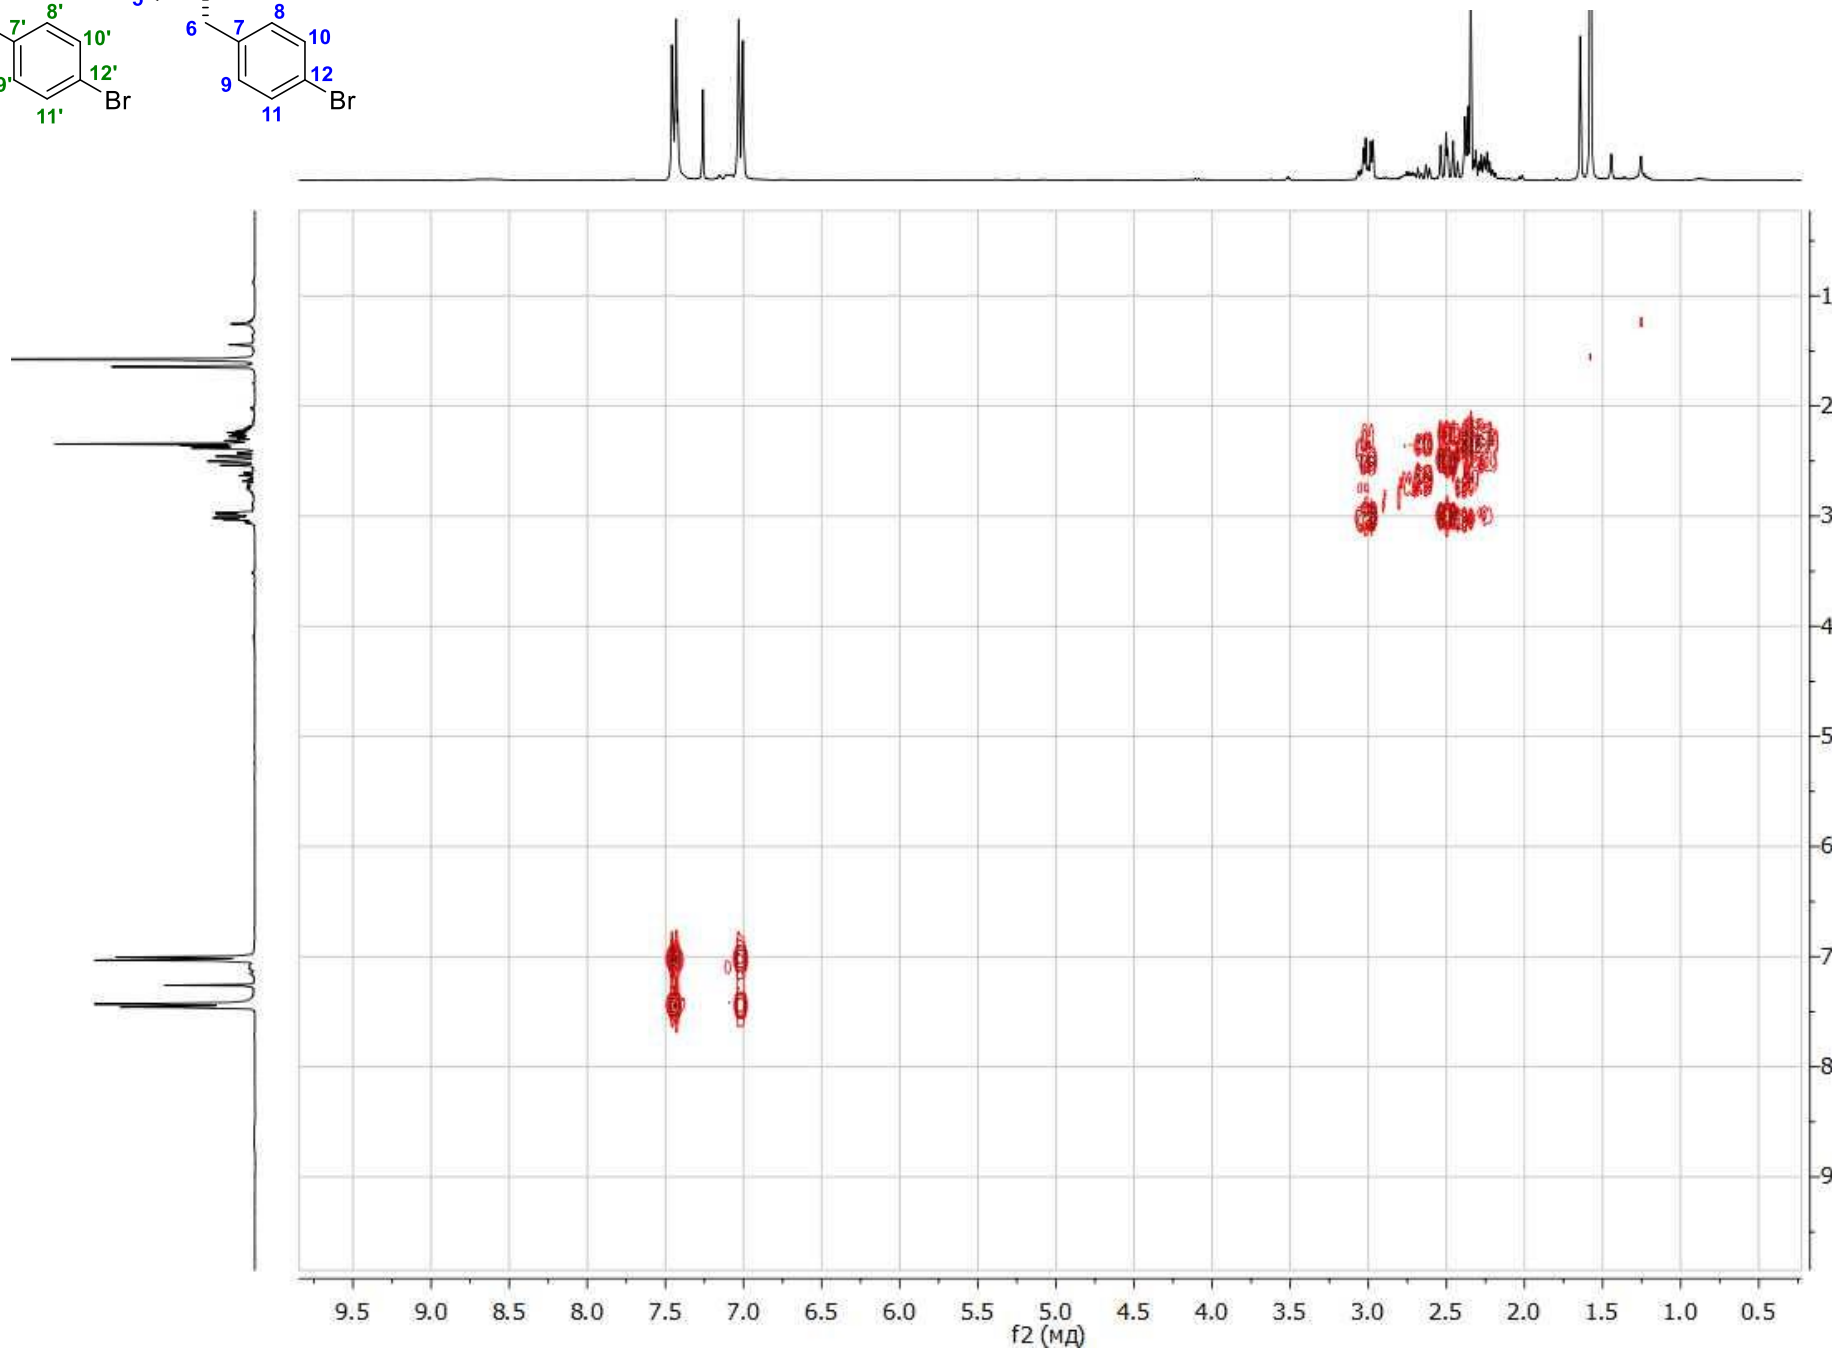

{<sup>1</sup>H-<sup>1</sup>H} NOESY

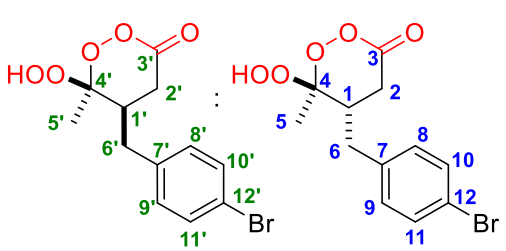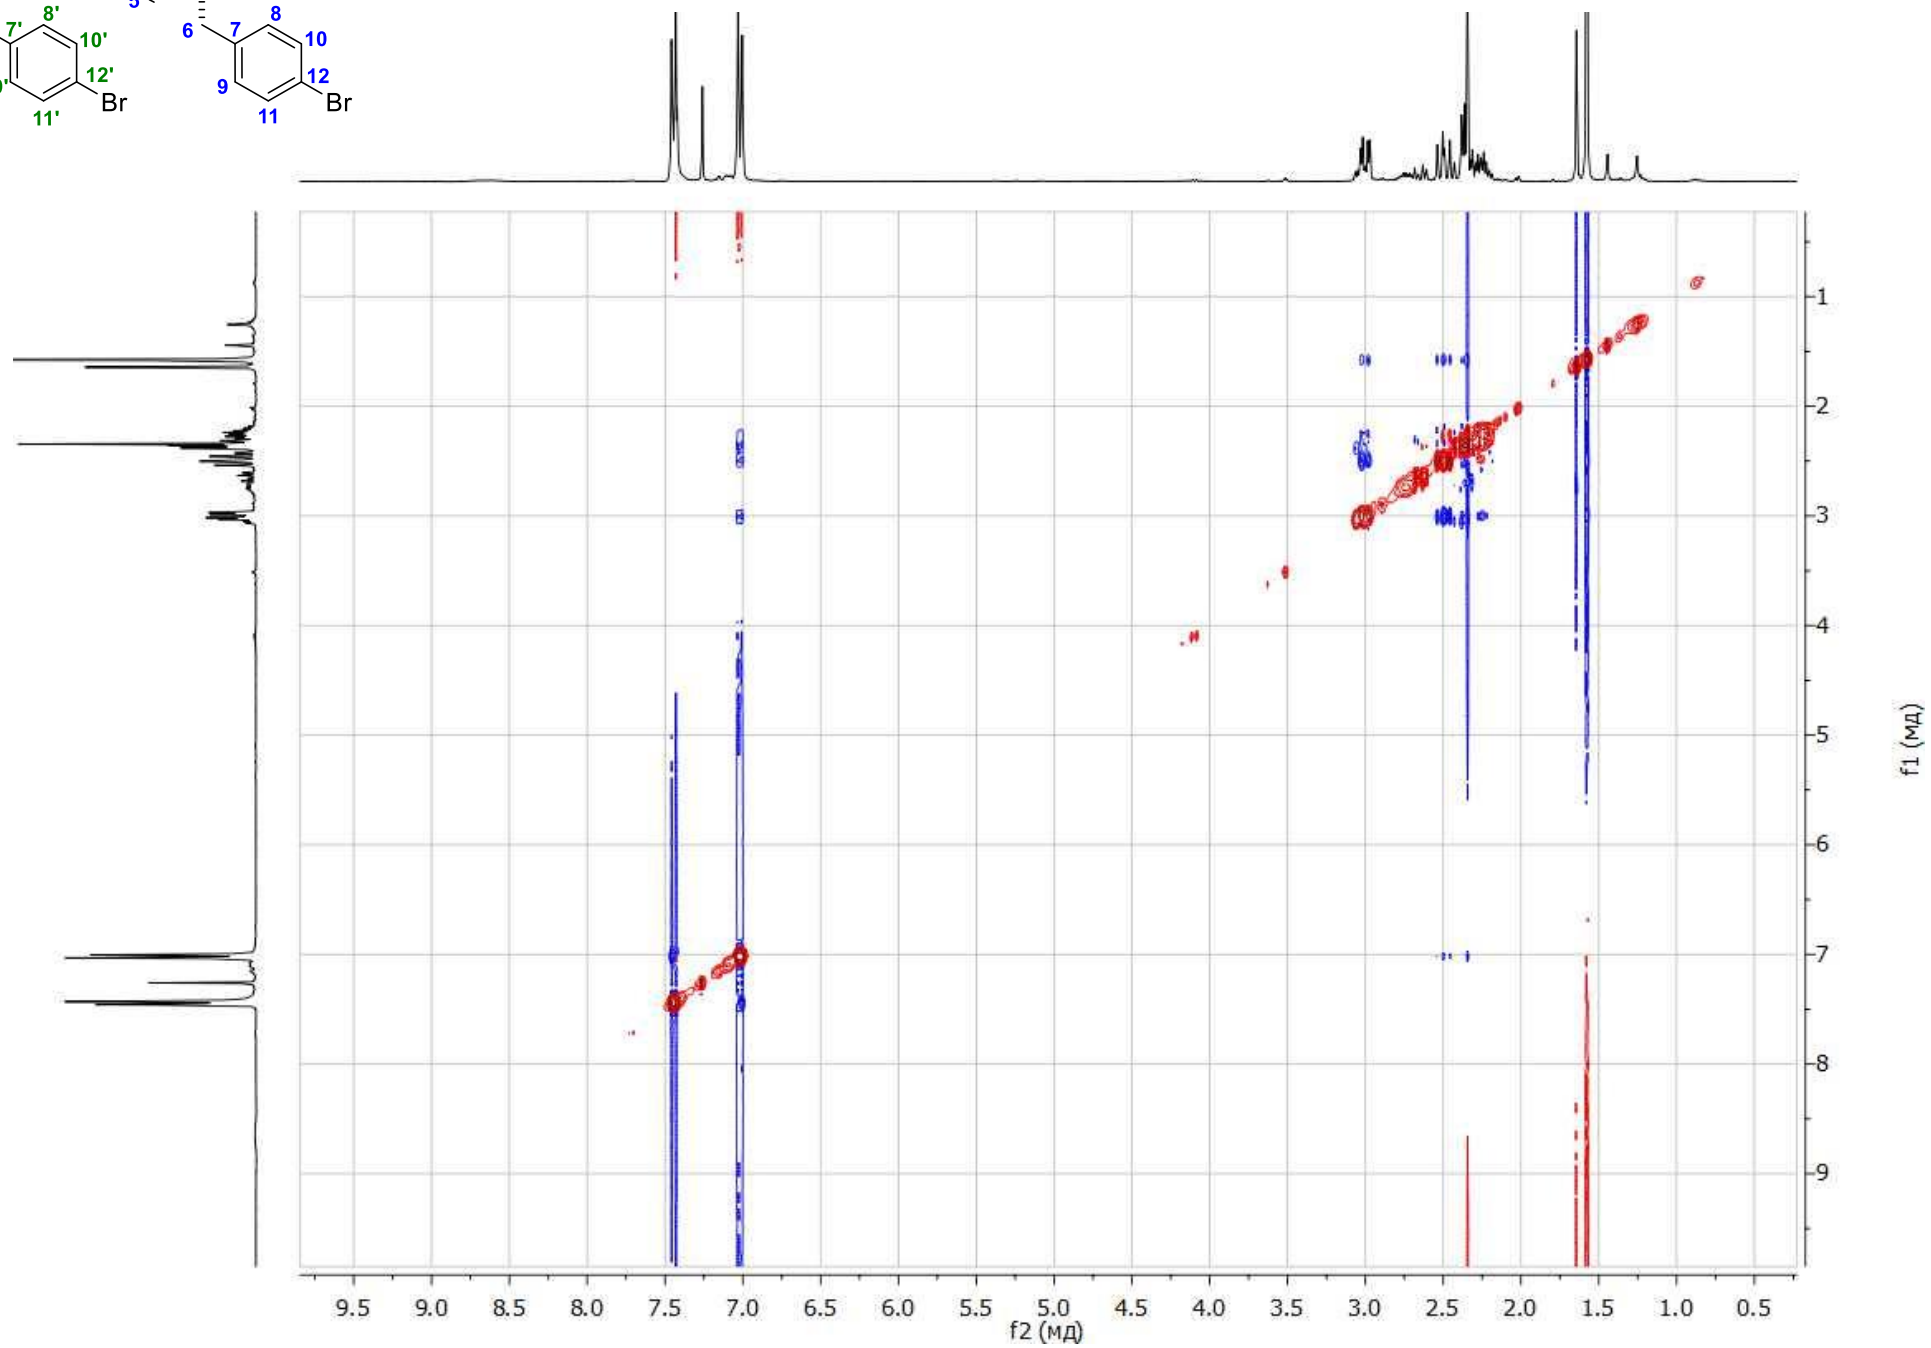

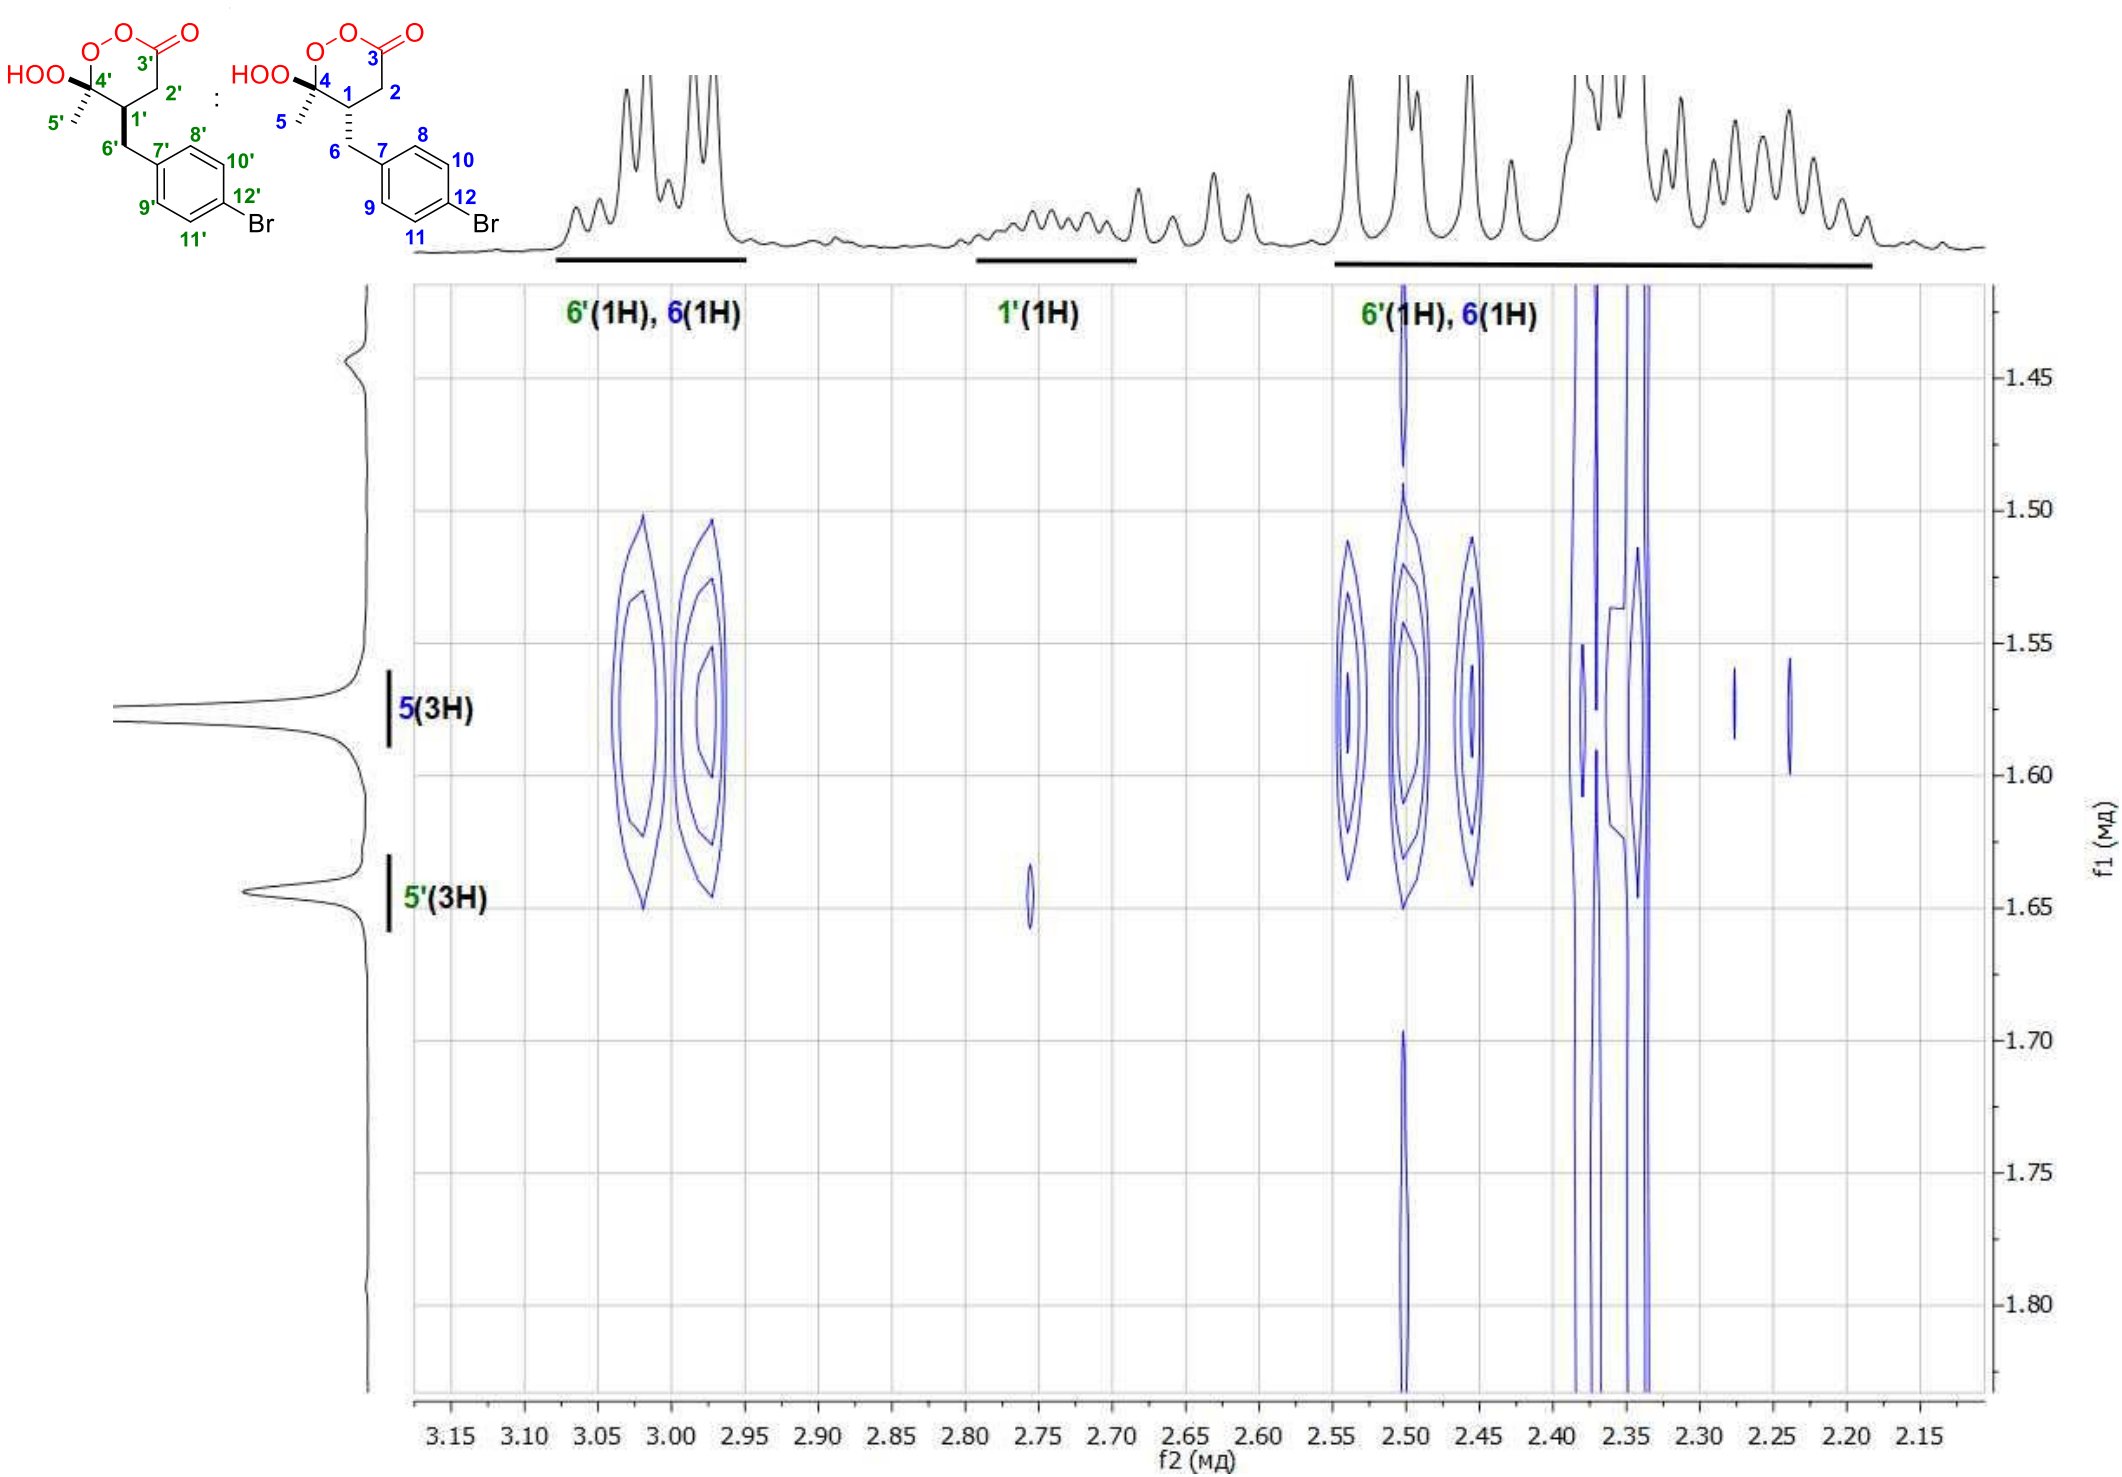

{<sup>1</sup>H-<sup>13</sup>C} HSQC

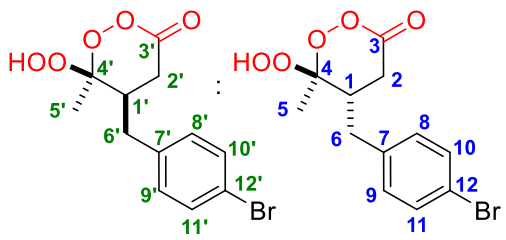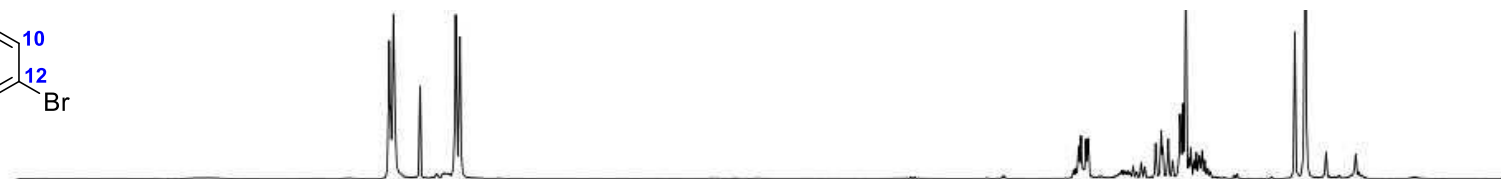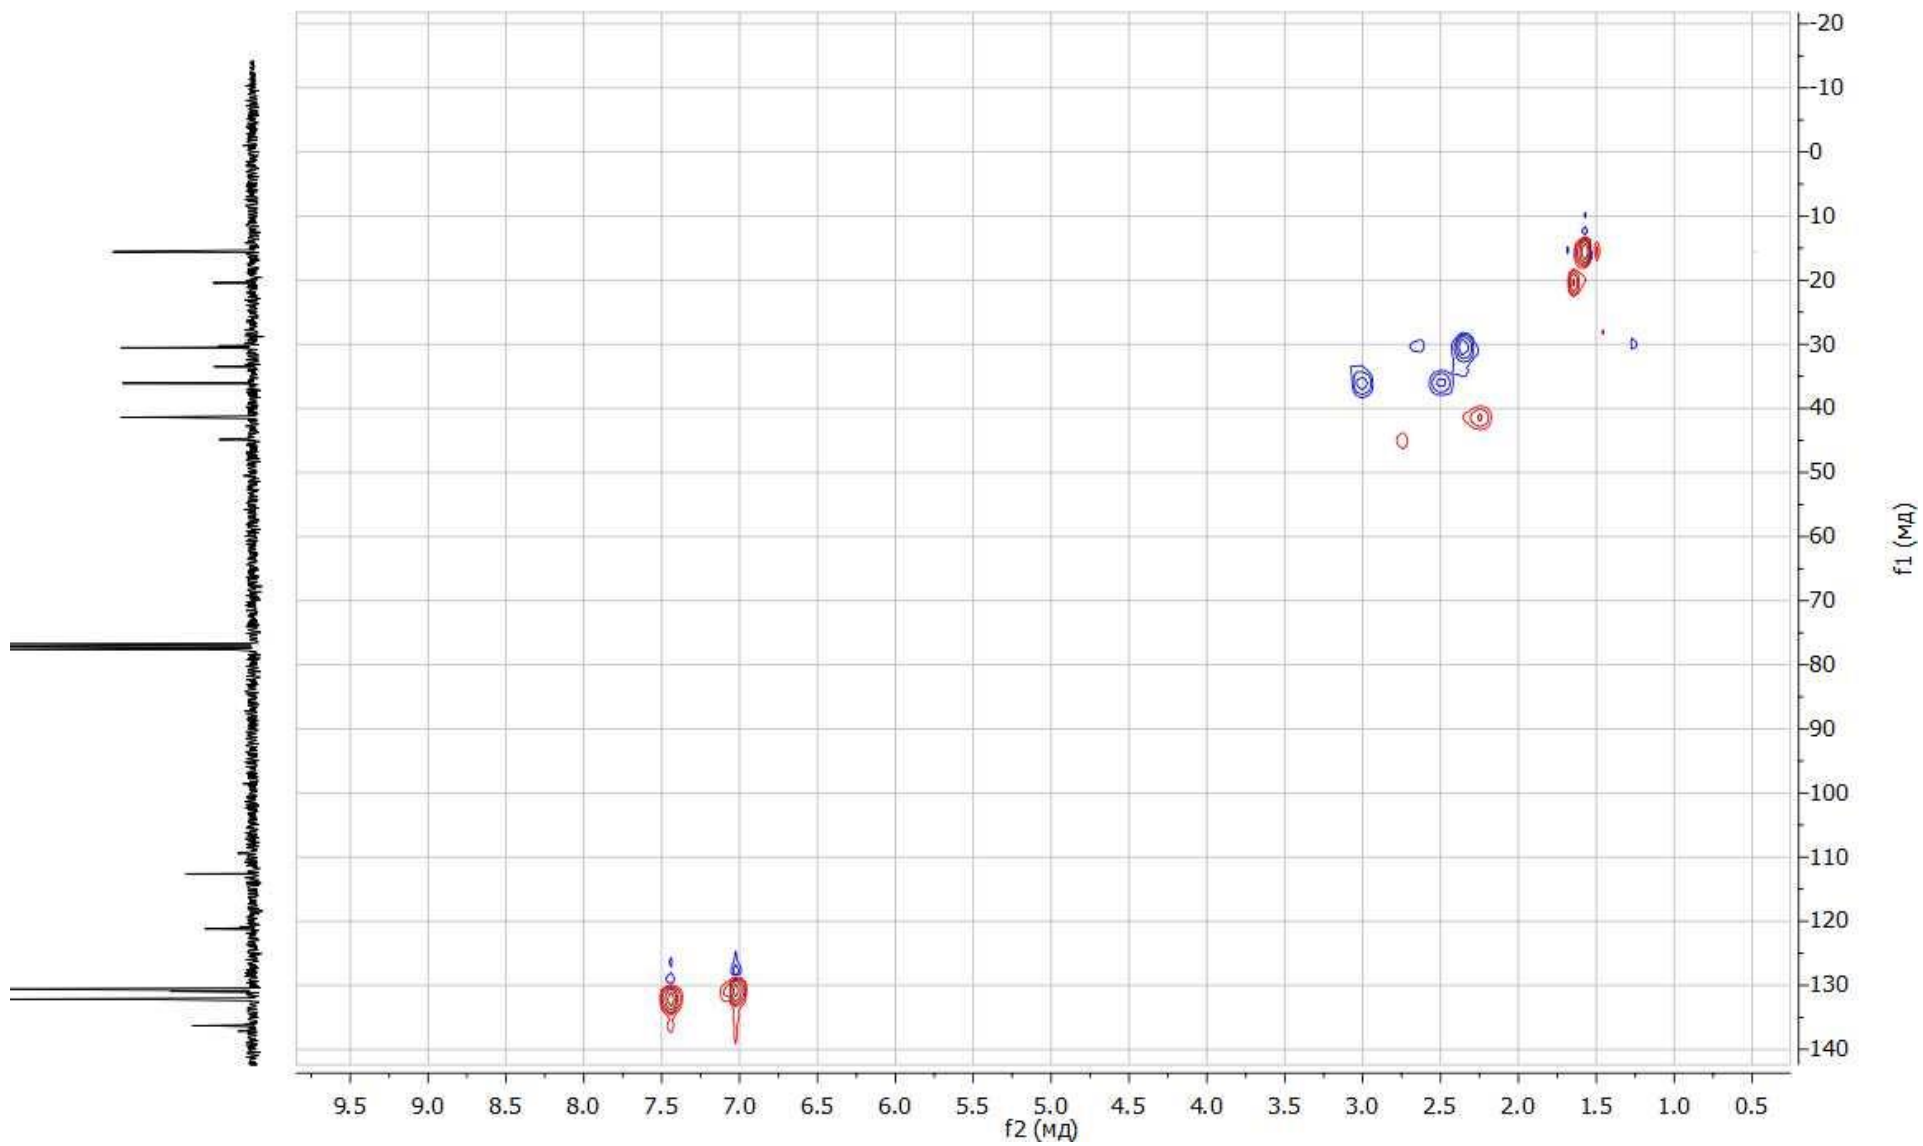



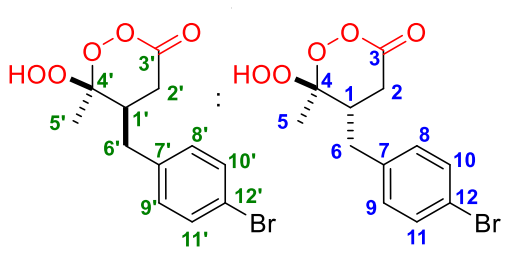

{<sup>1</sup>H-<sup>13</sup>C} HMBC

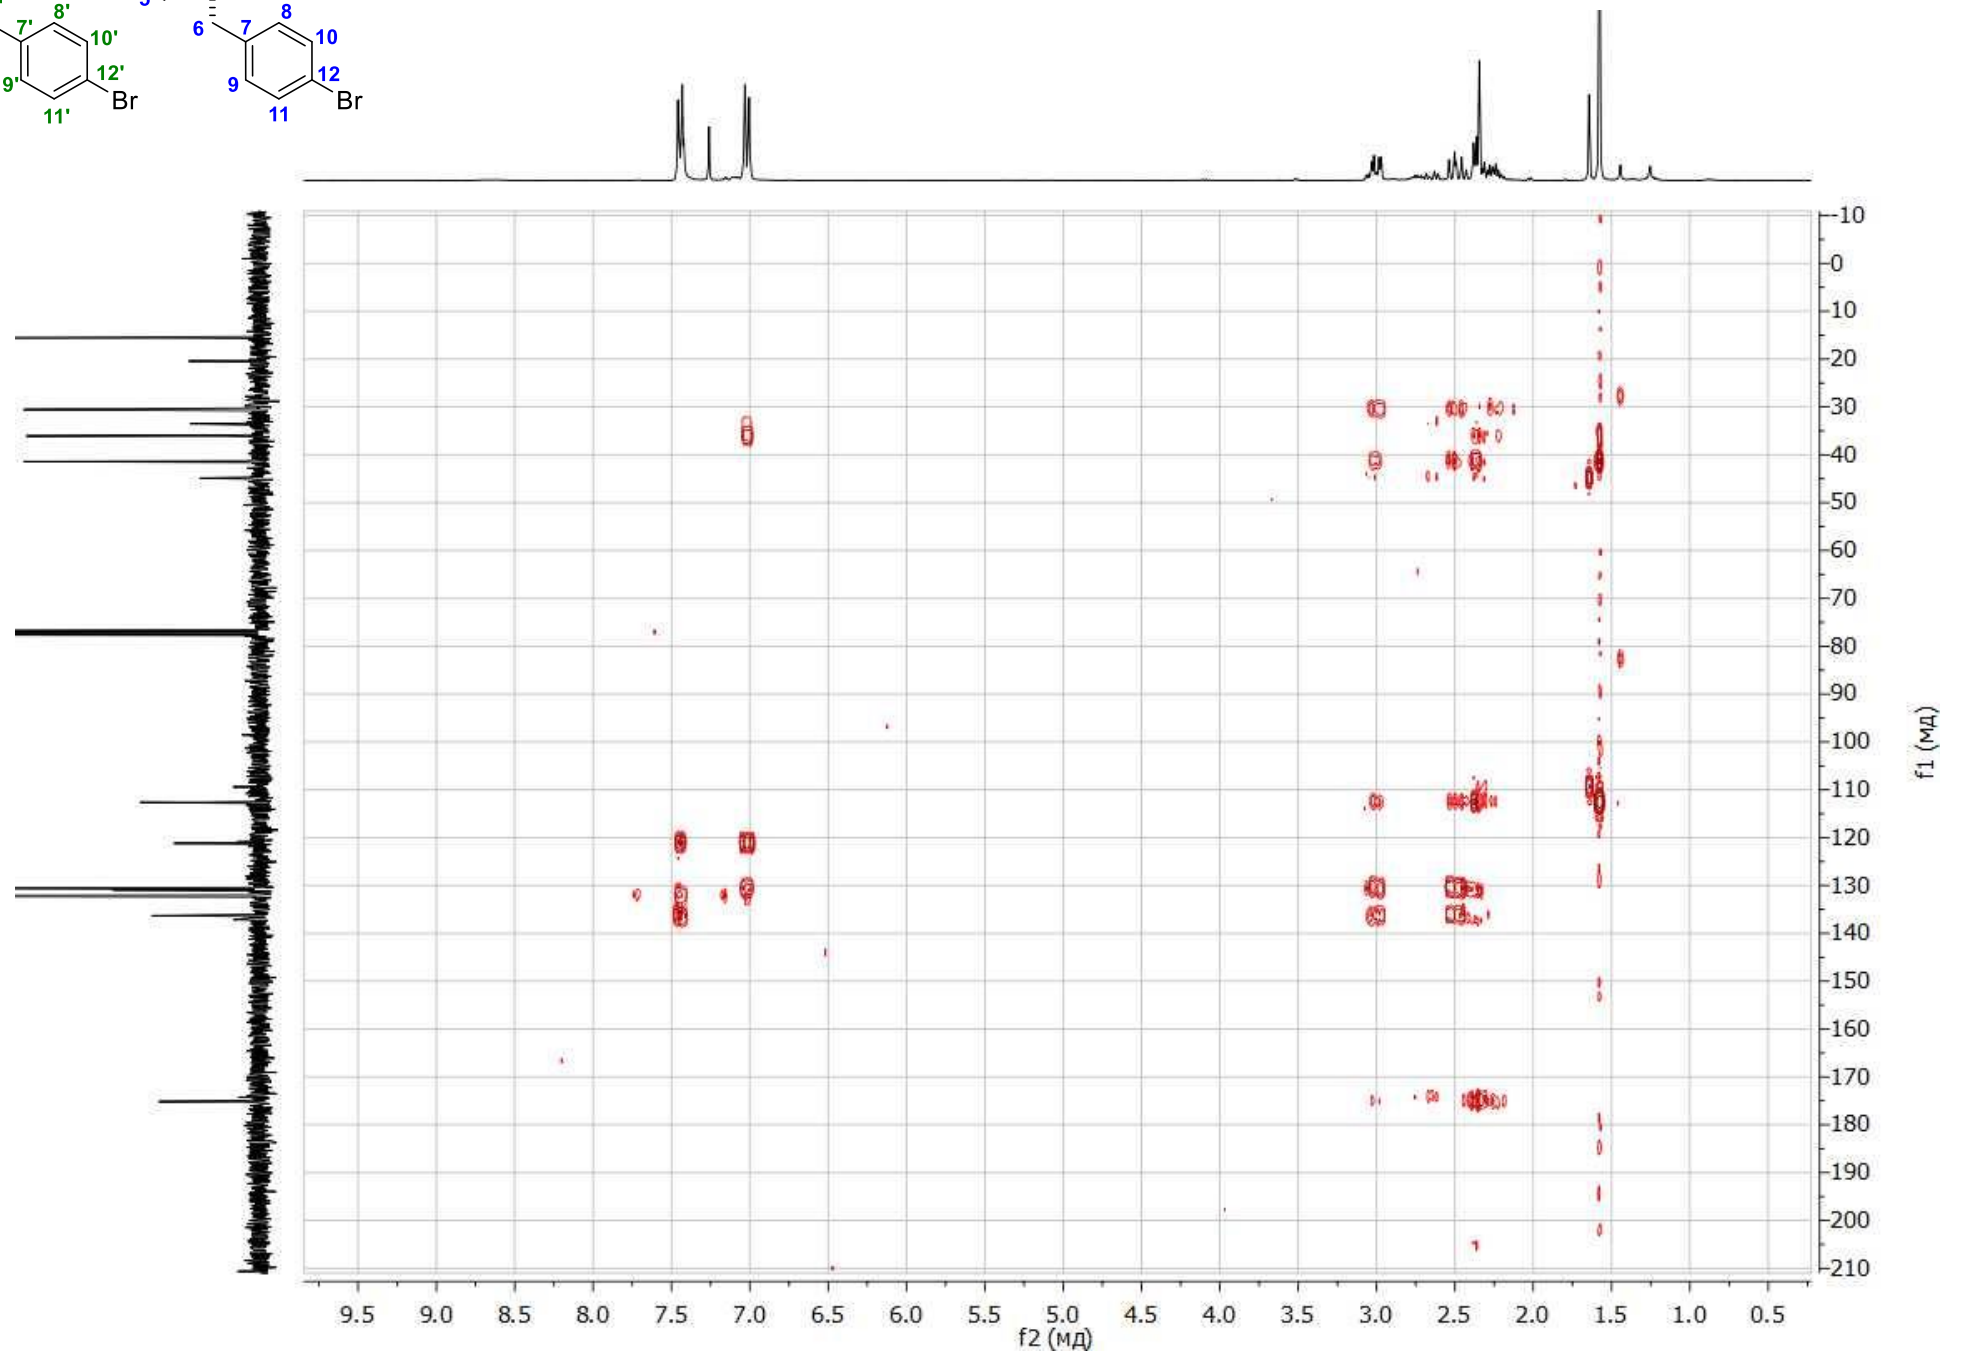

5-(4-(*Tert*-butyl)benzyl)-6-hydroperoxy-6-methyl-1,2-dioxan-3-one, 2e

<sup>1</sup>H NMR

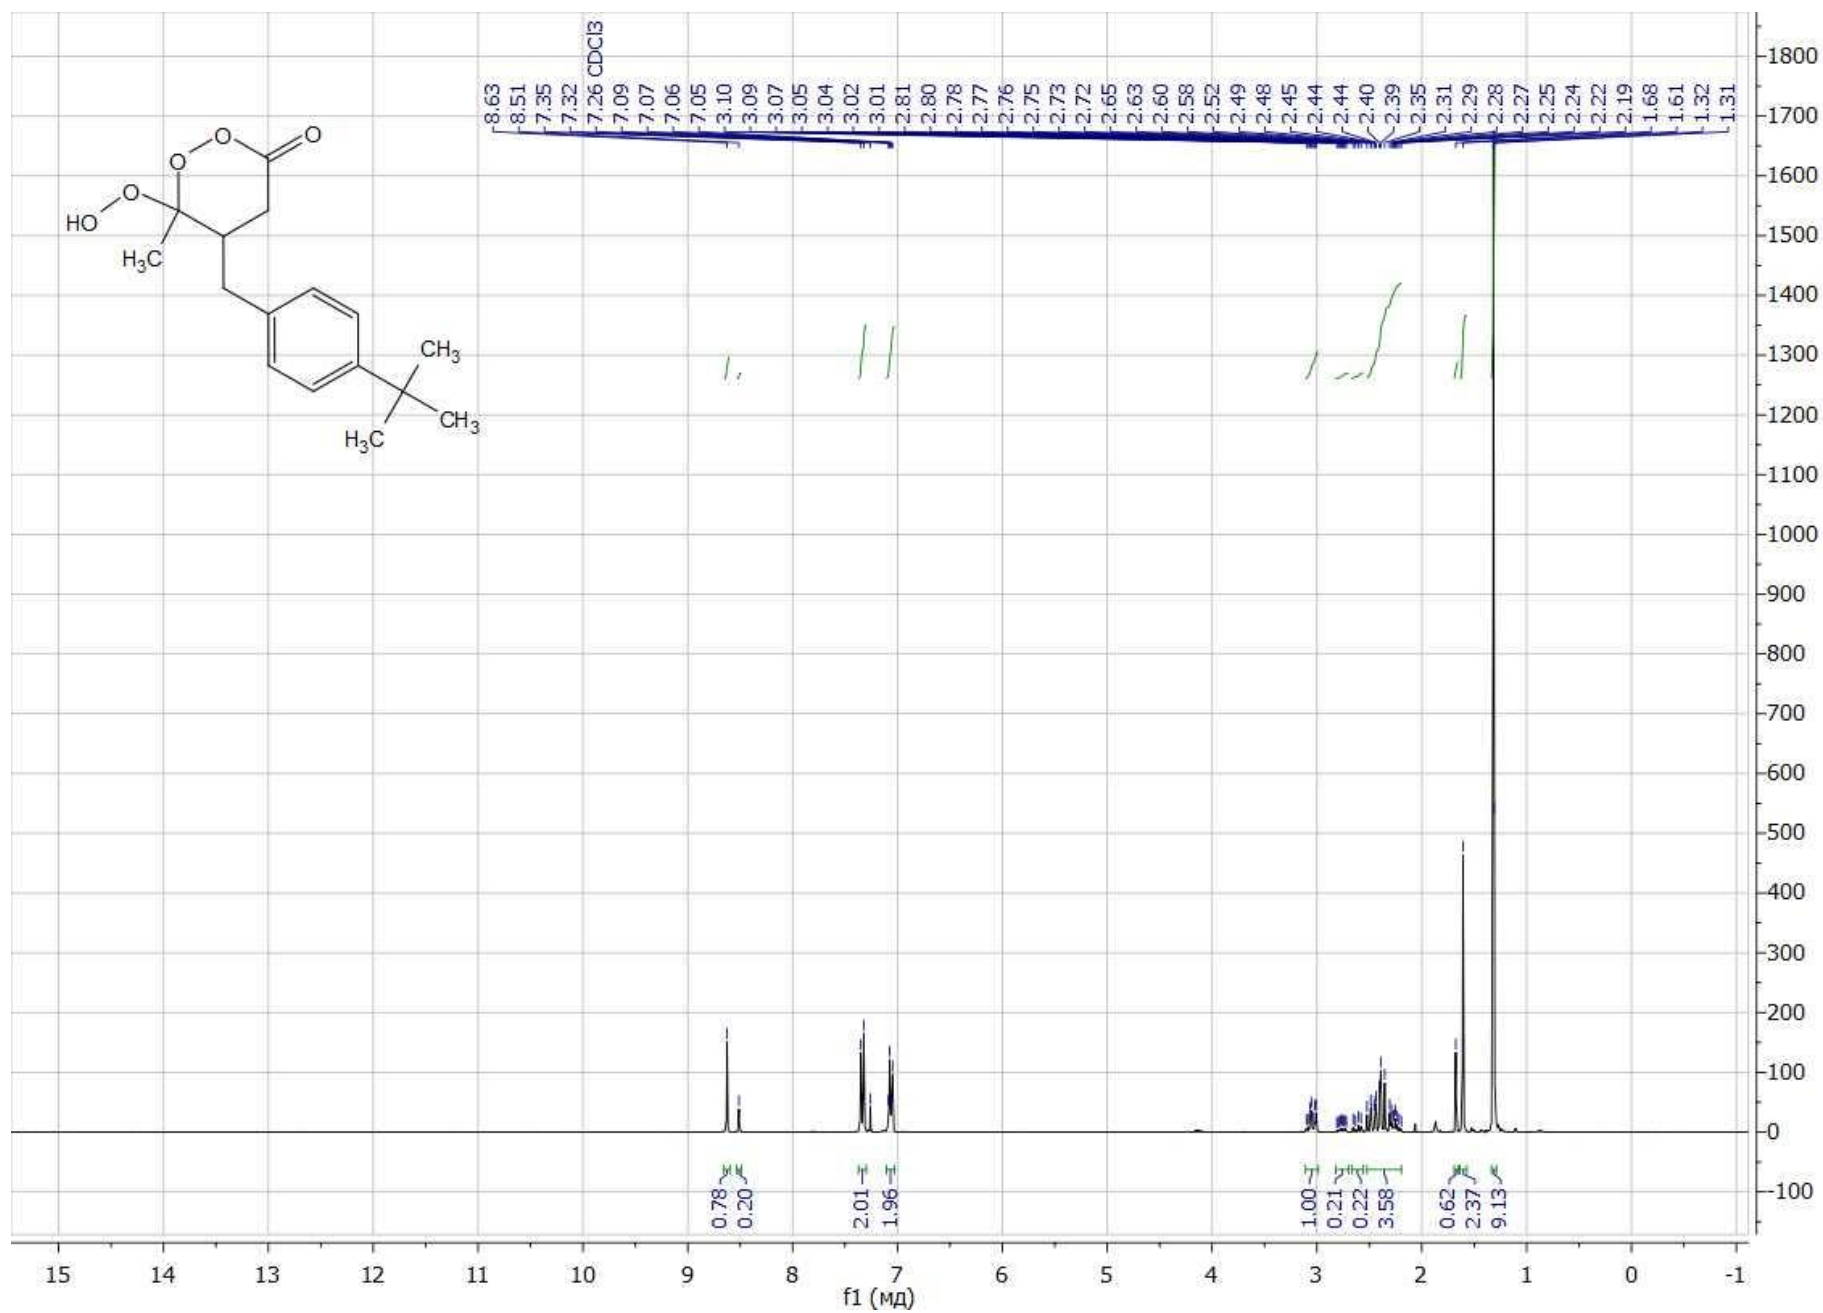

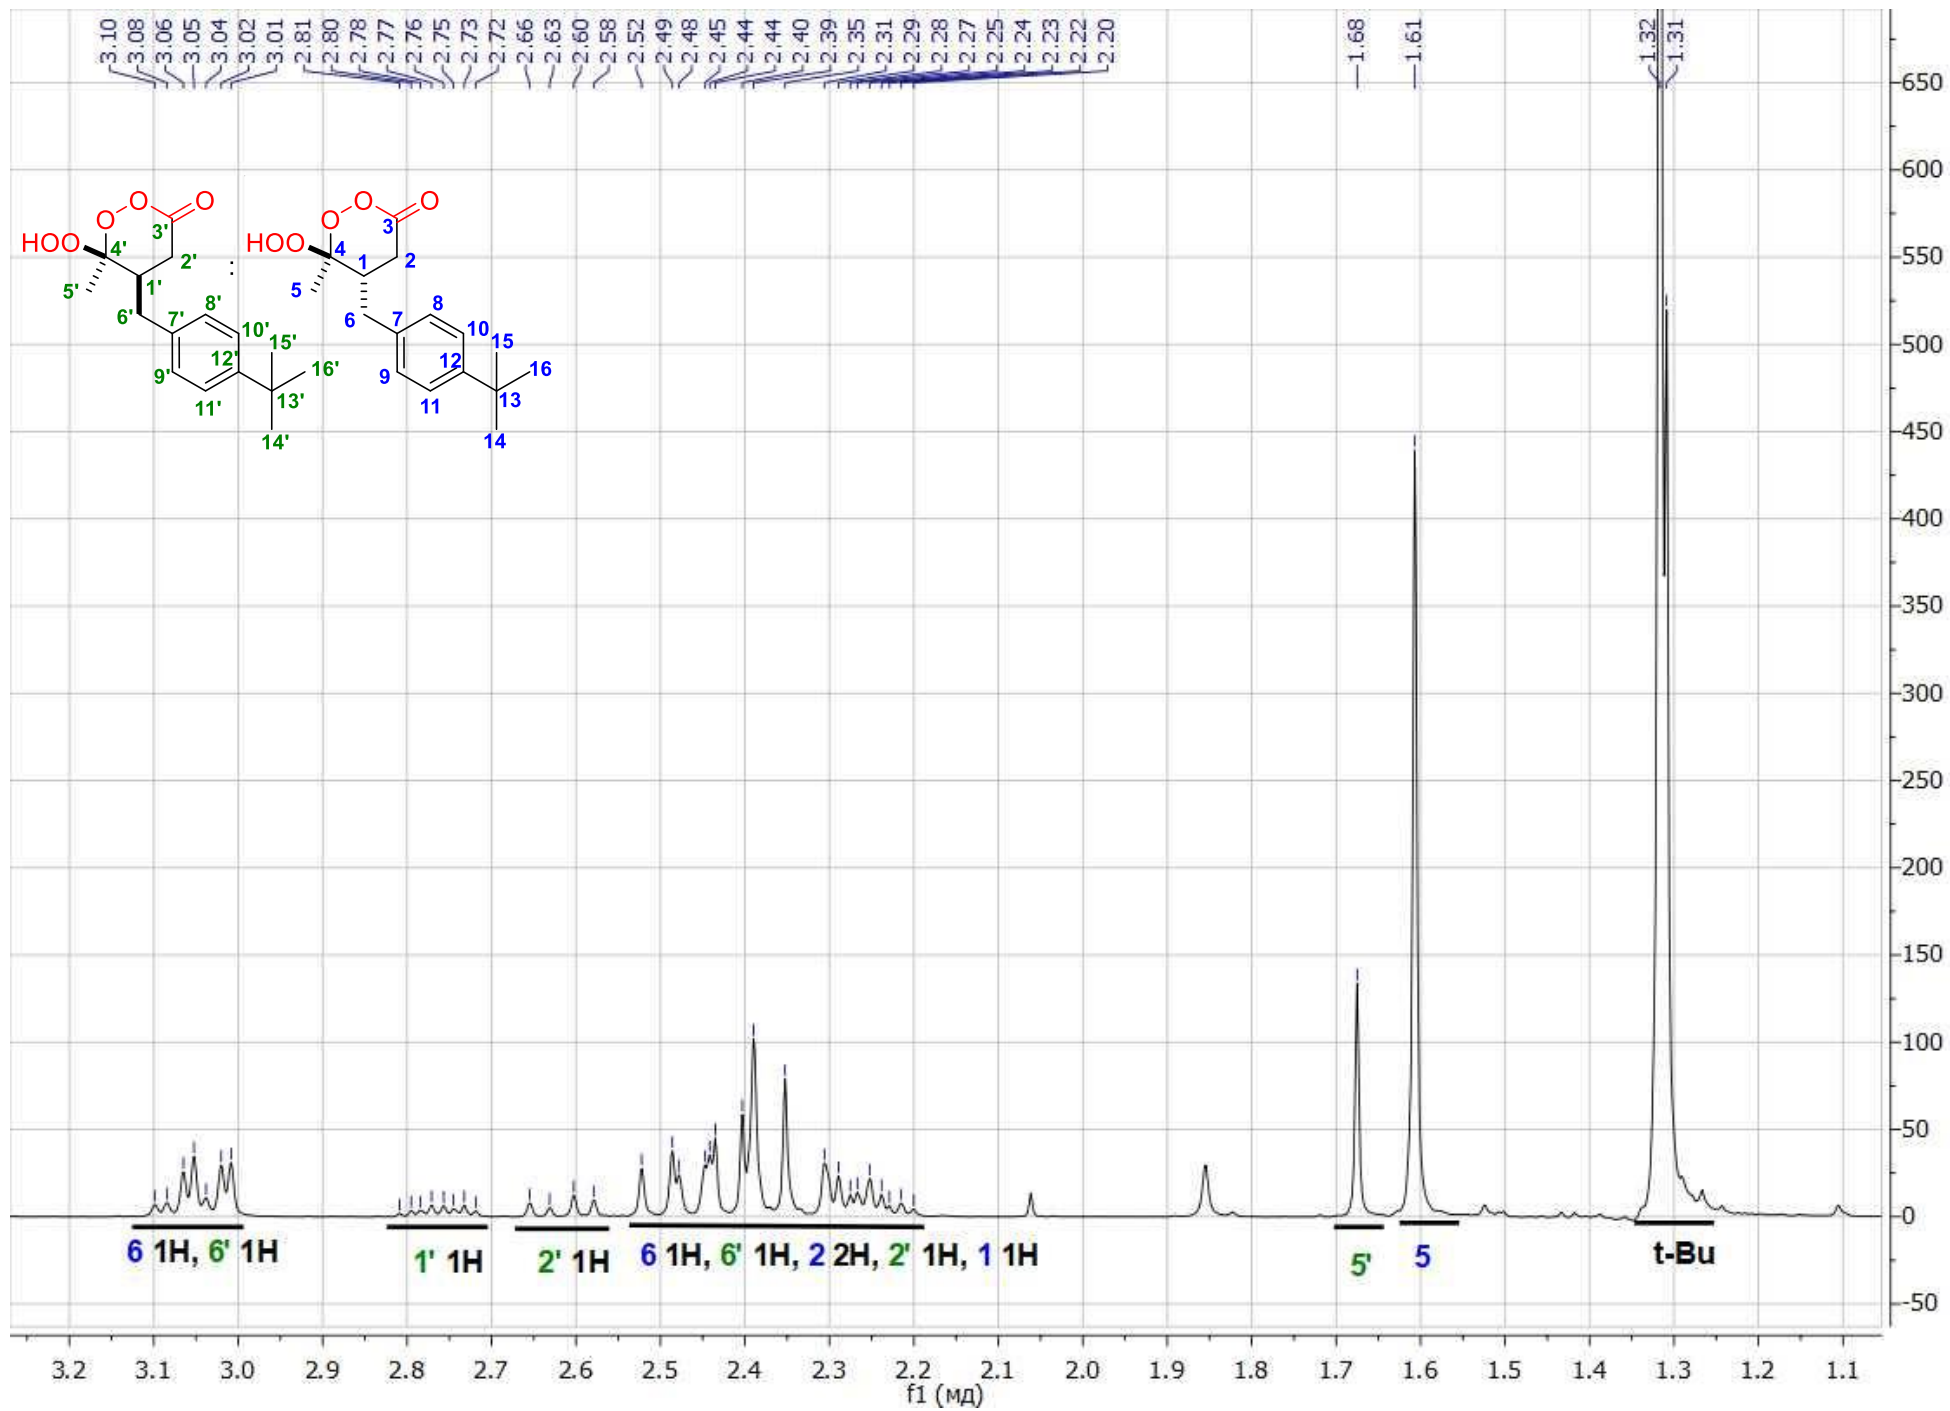

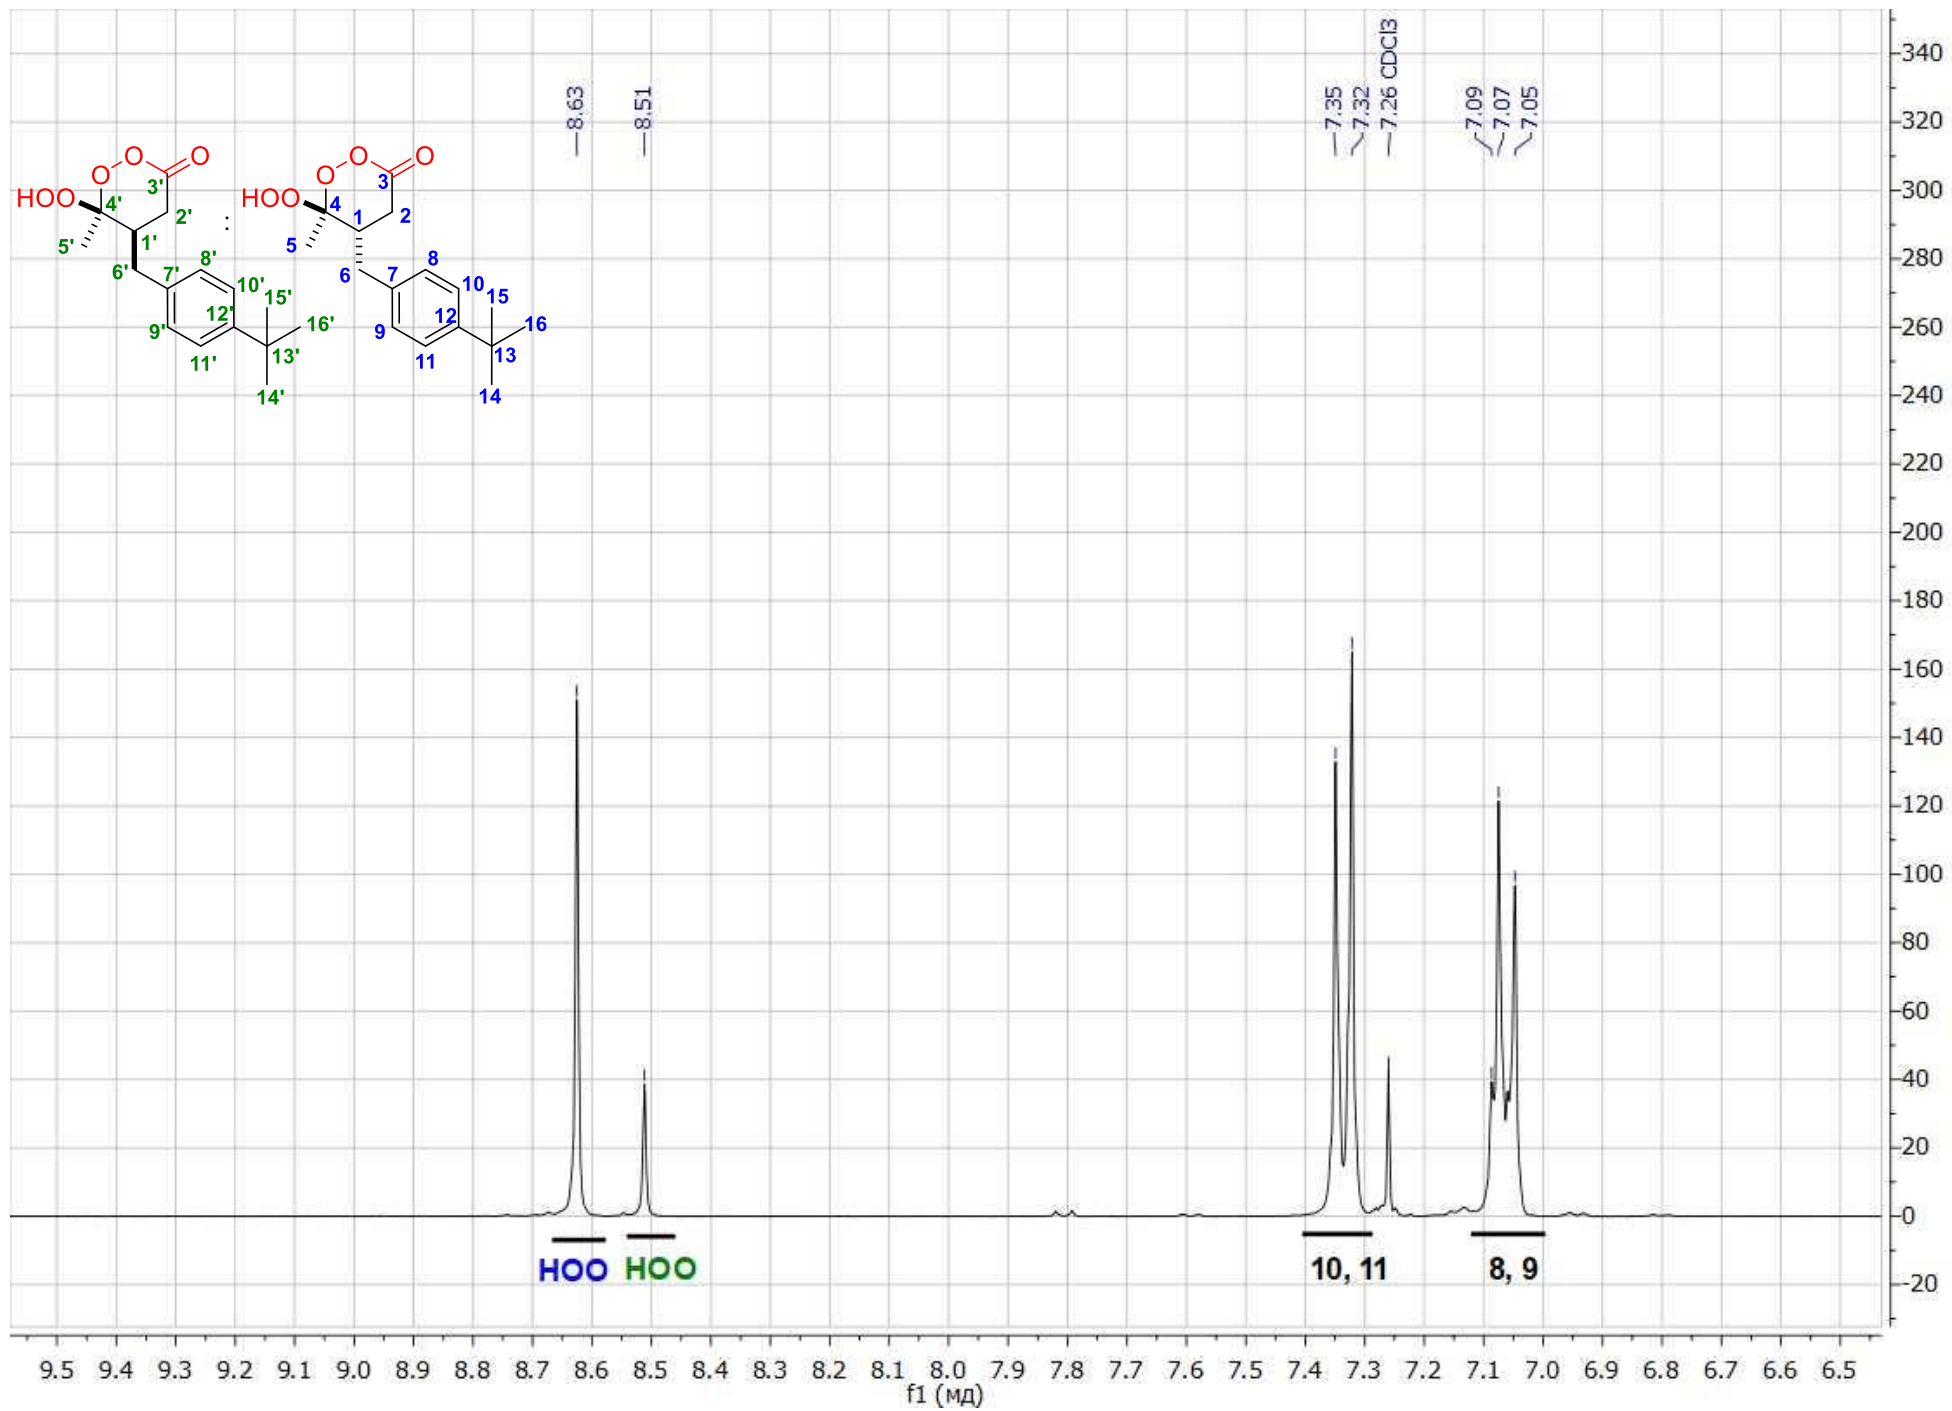

<sup>13</sup>C NMR

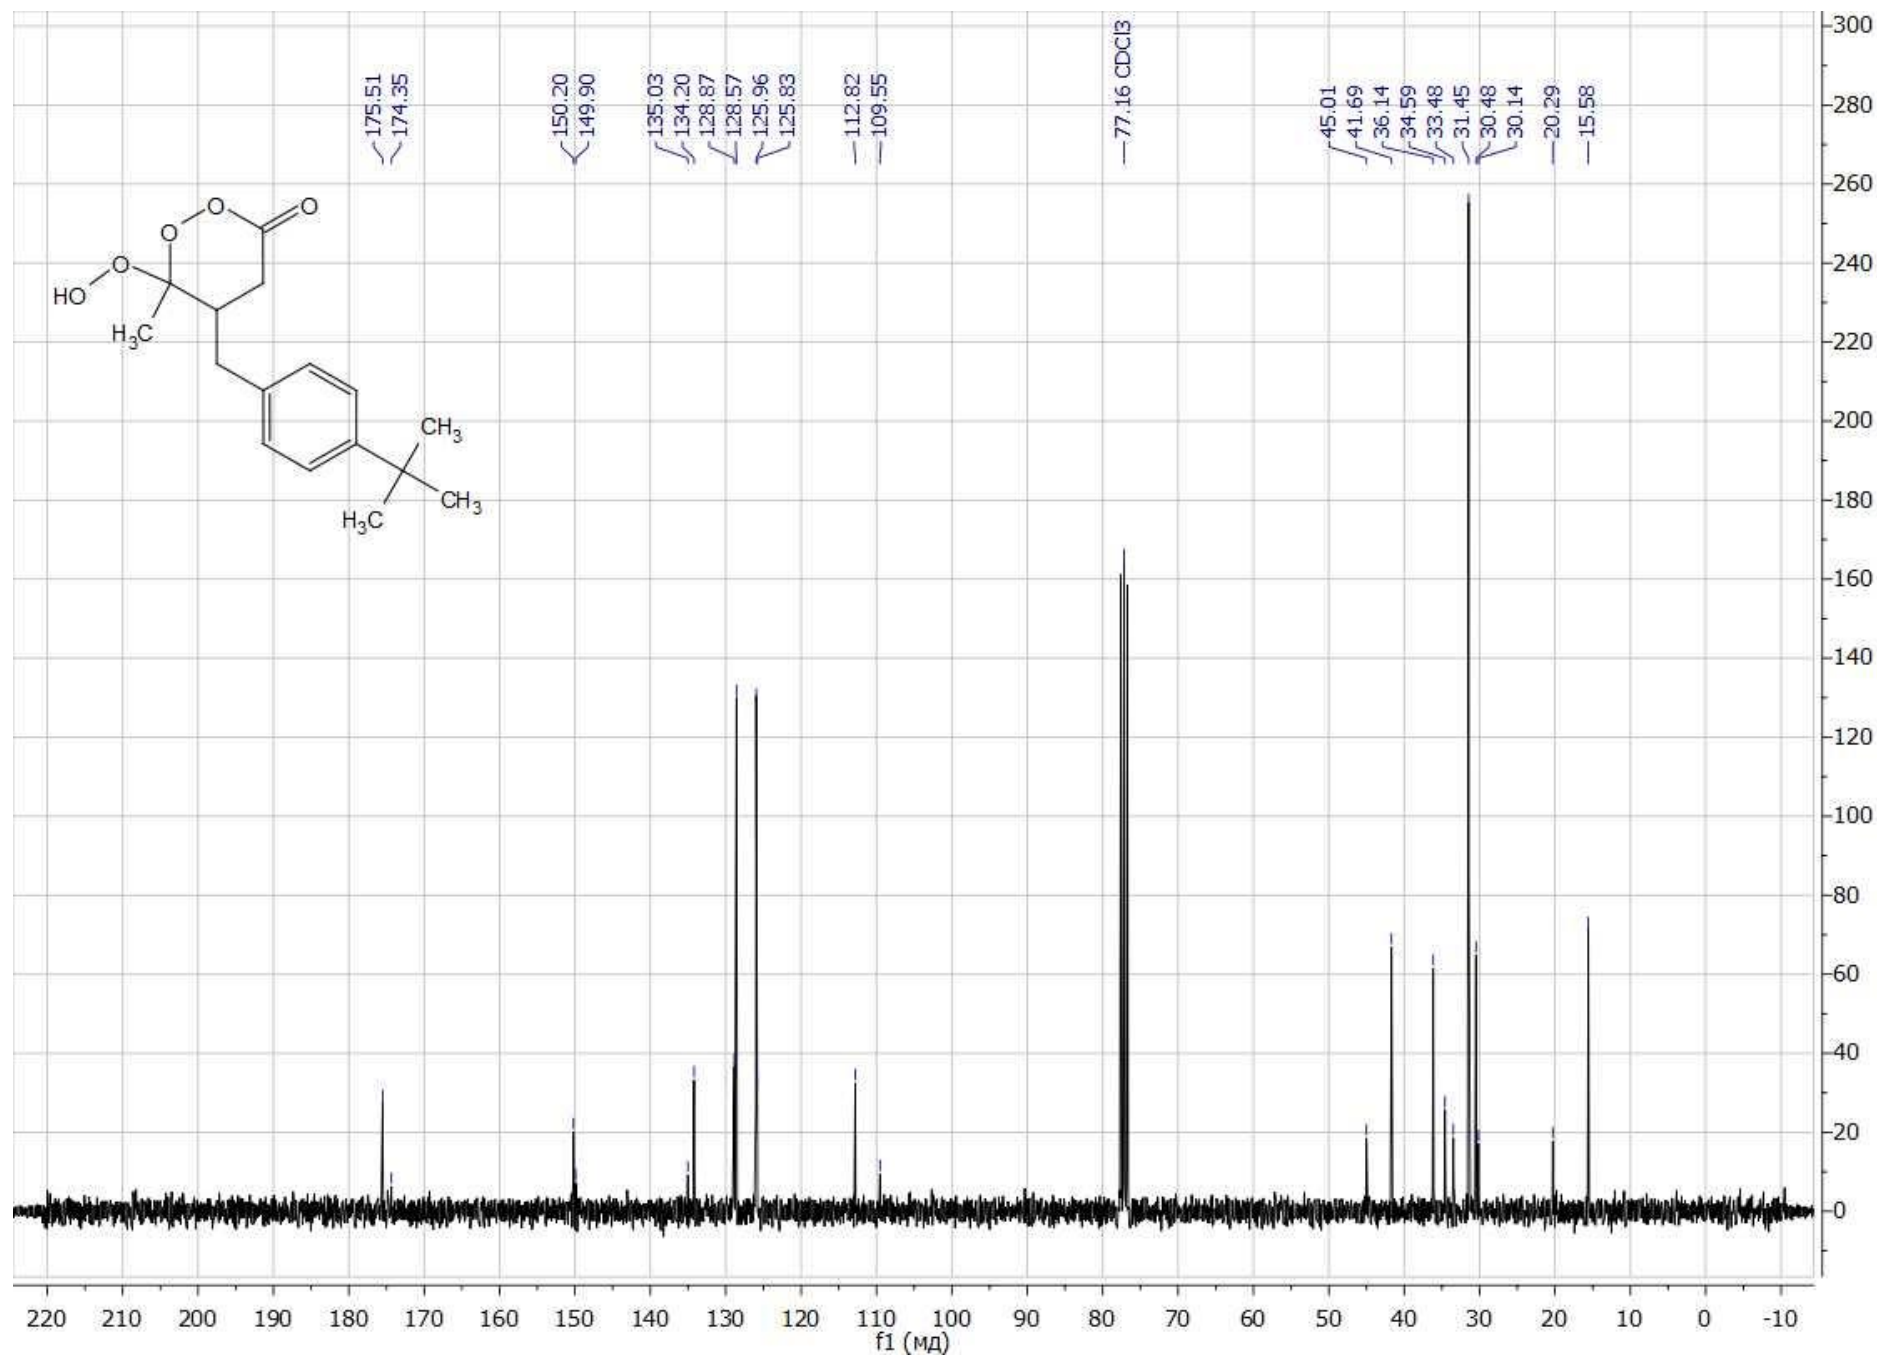

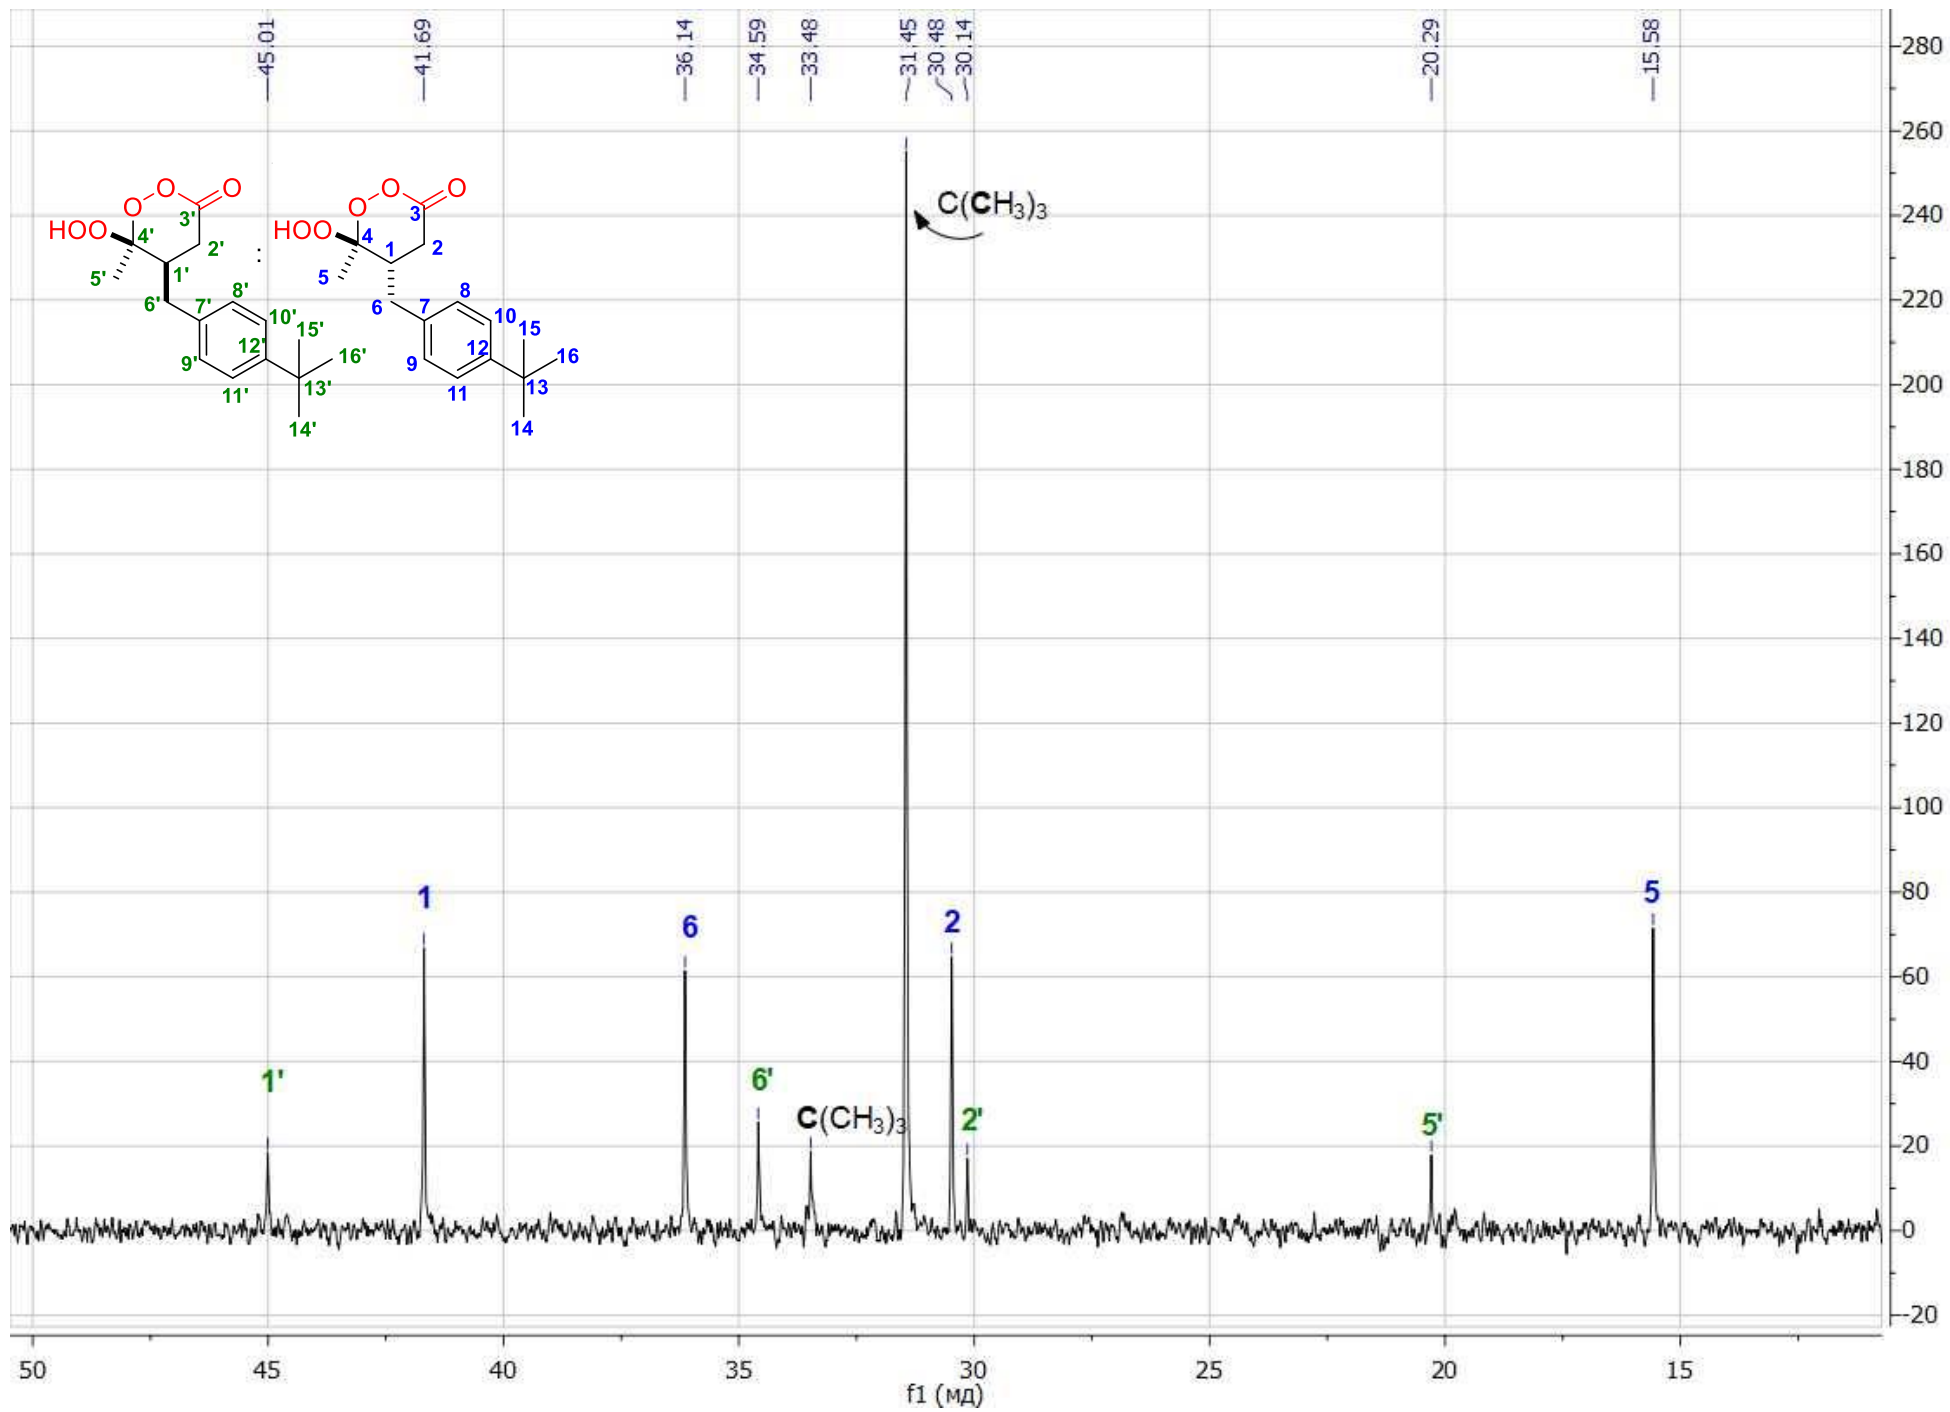

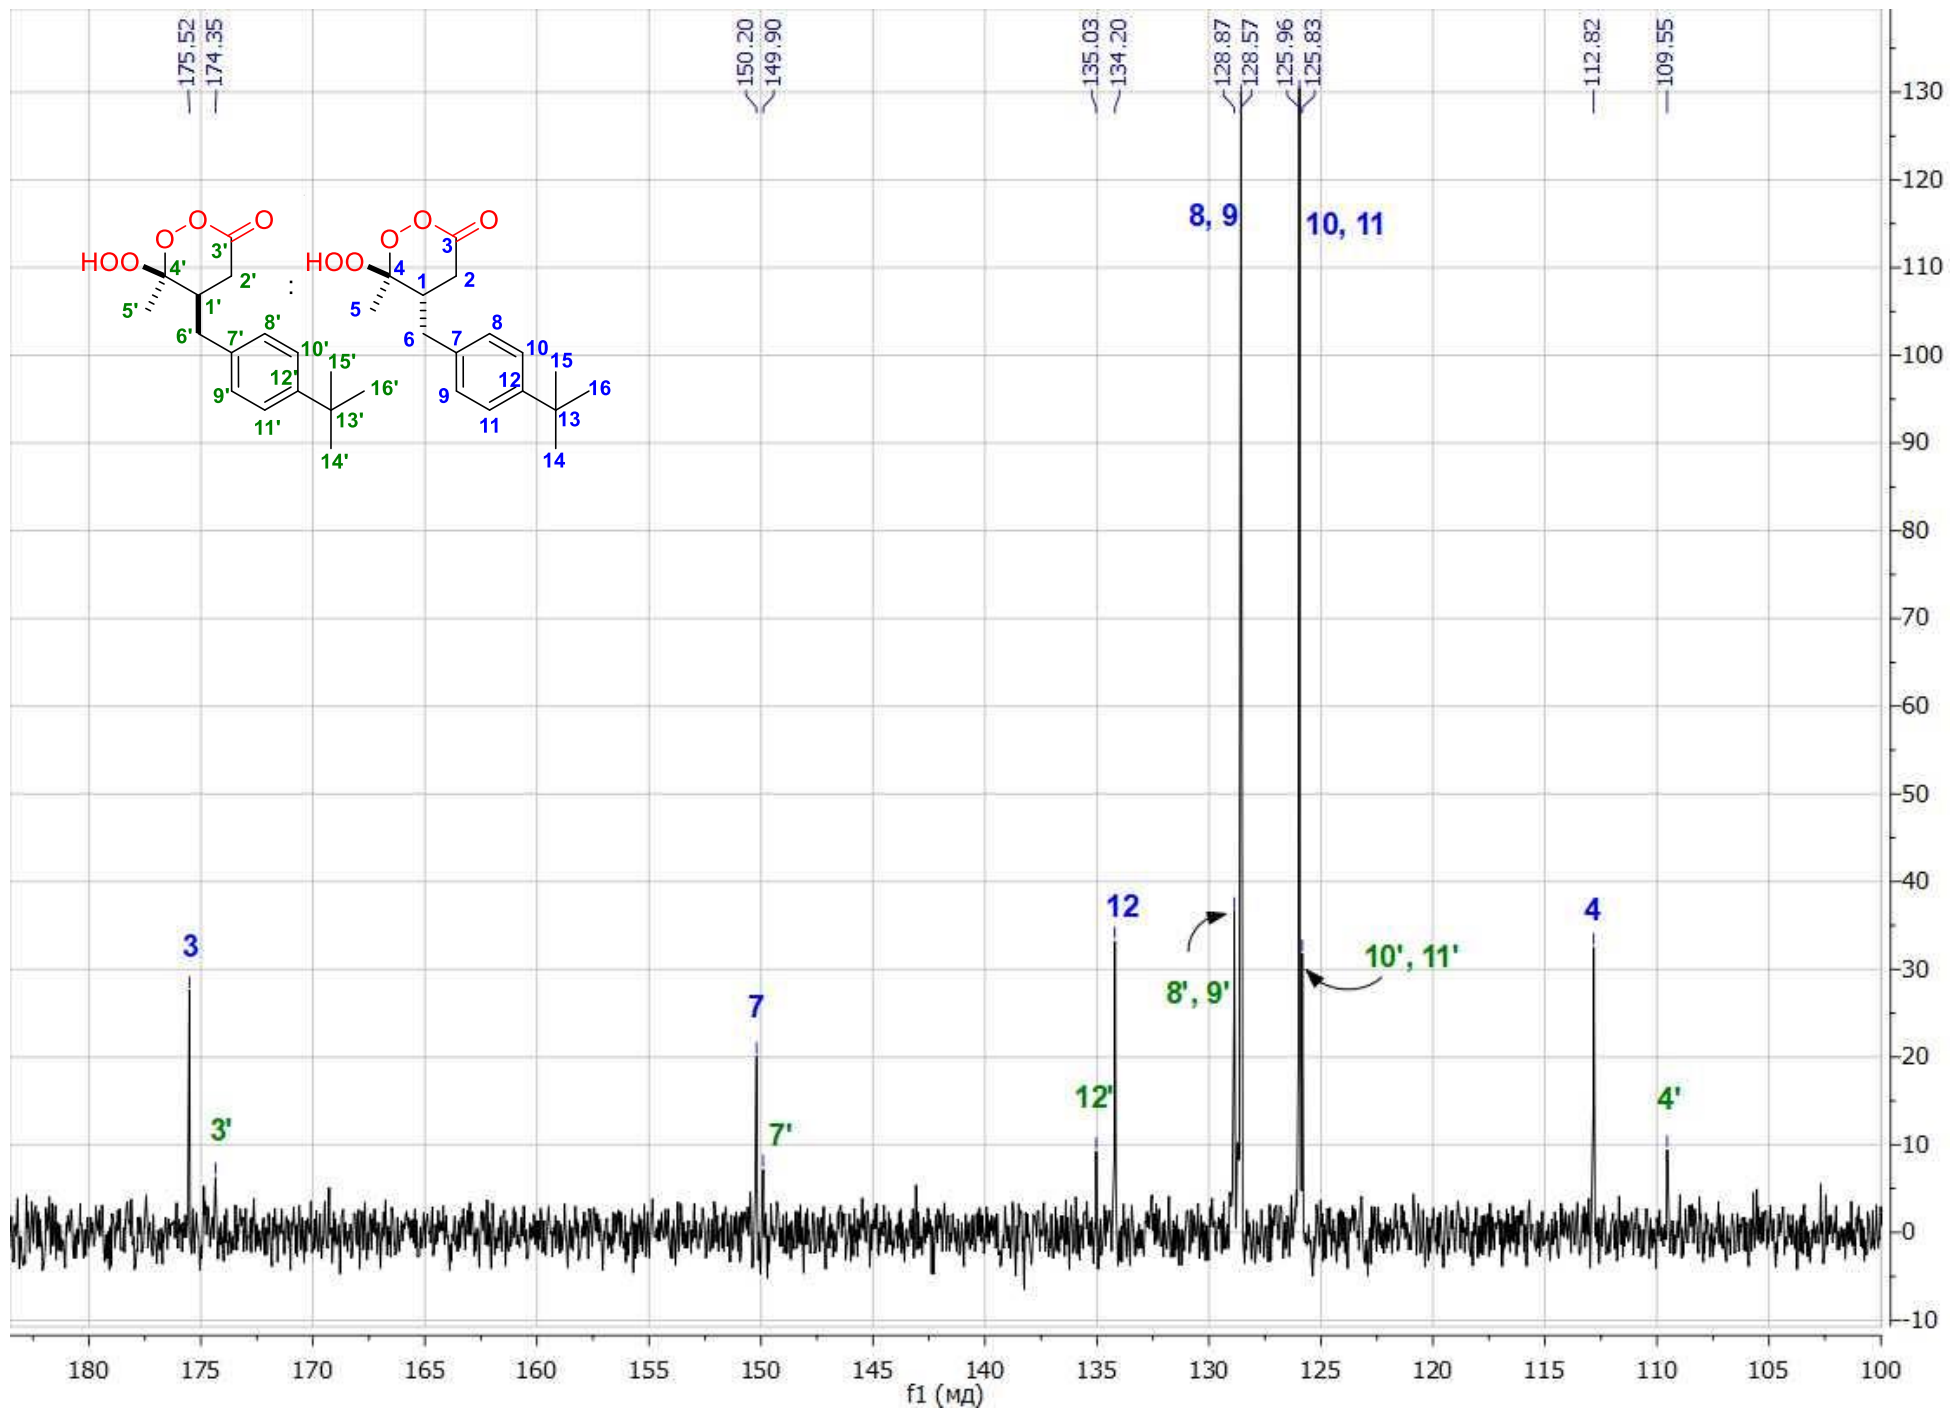

<sup>13</sup>C<sub>apt\_jmod</sub>

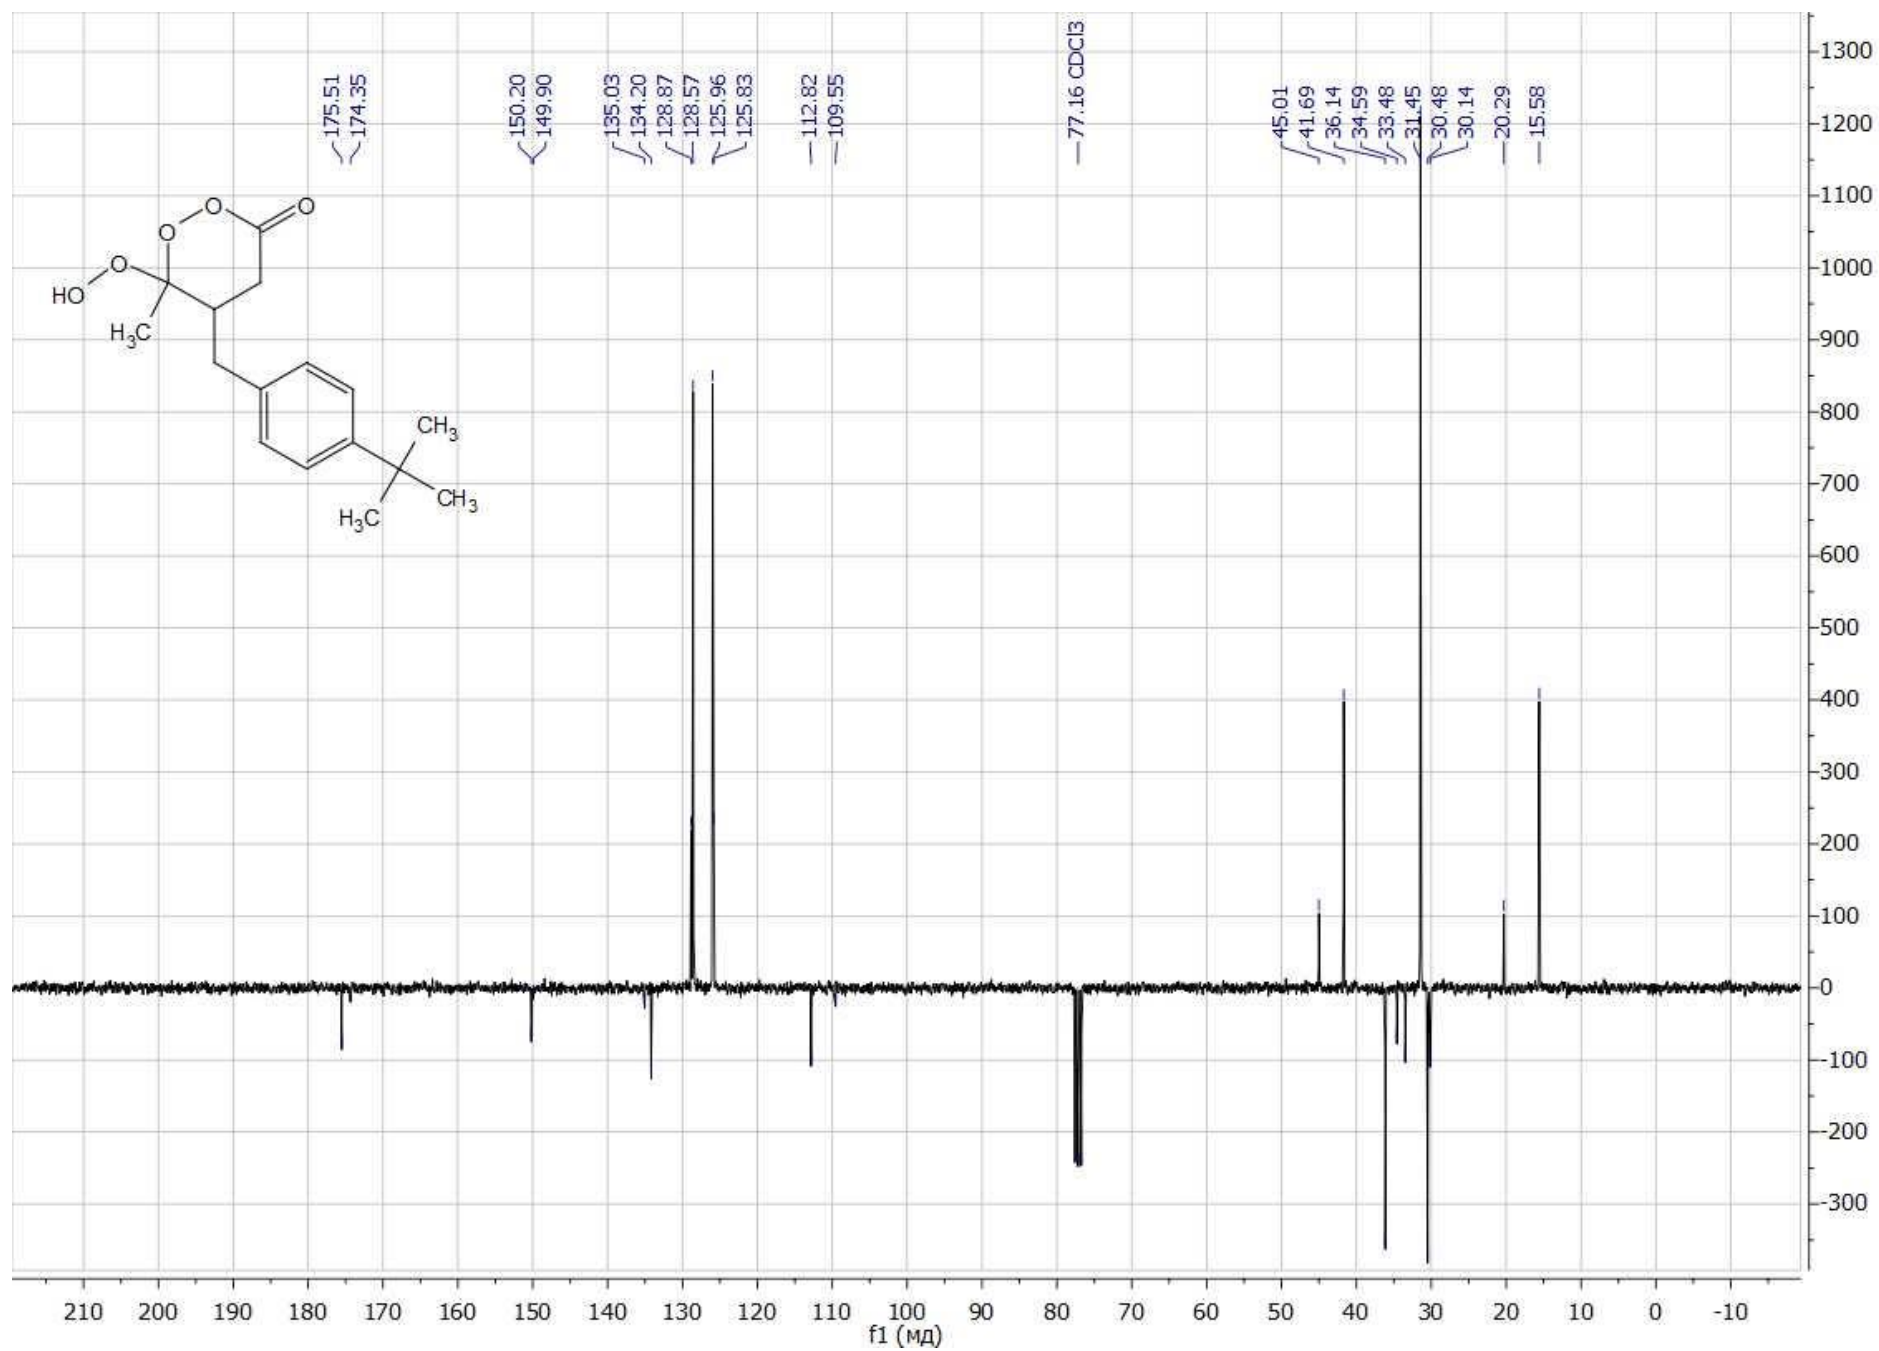



{<sup>1</sup>H-<sup>1</sup>H} COSY

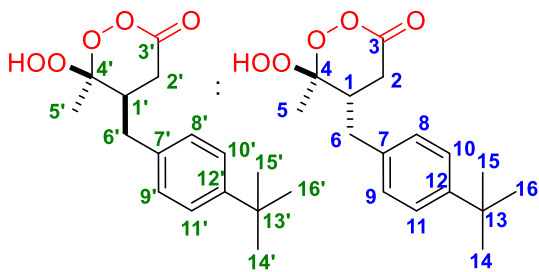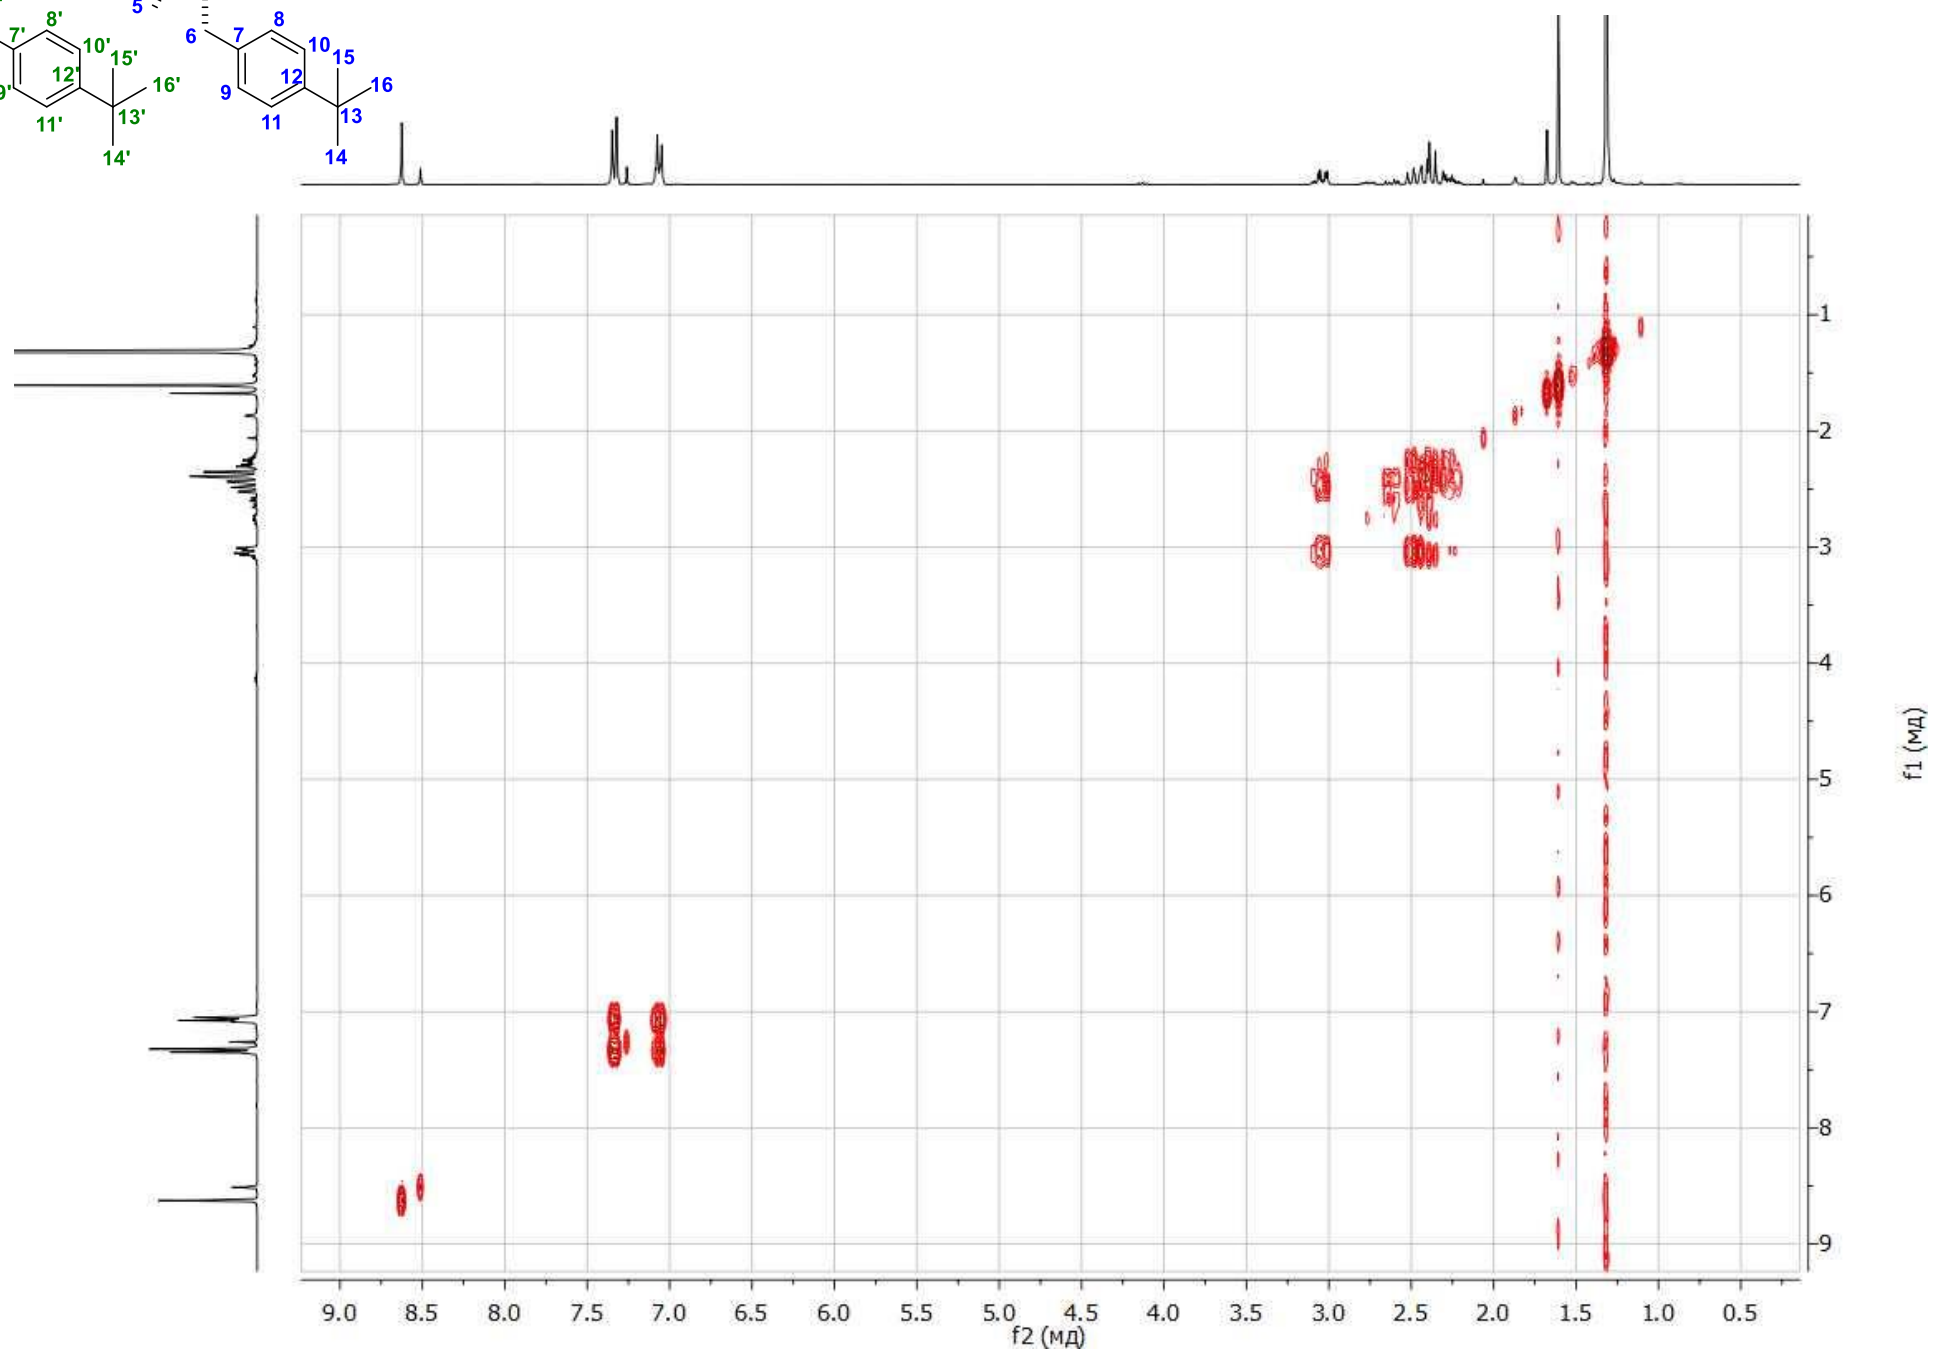

{<sup>1</sup>H-<sup>1</sup>H} NOESY

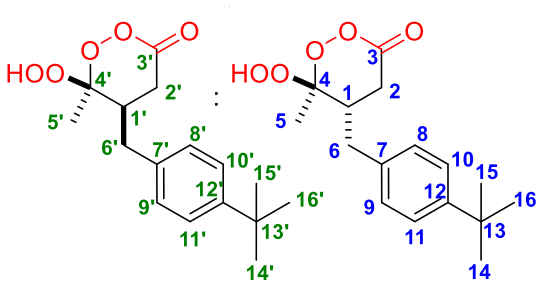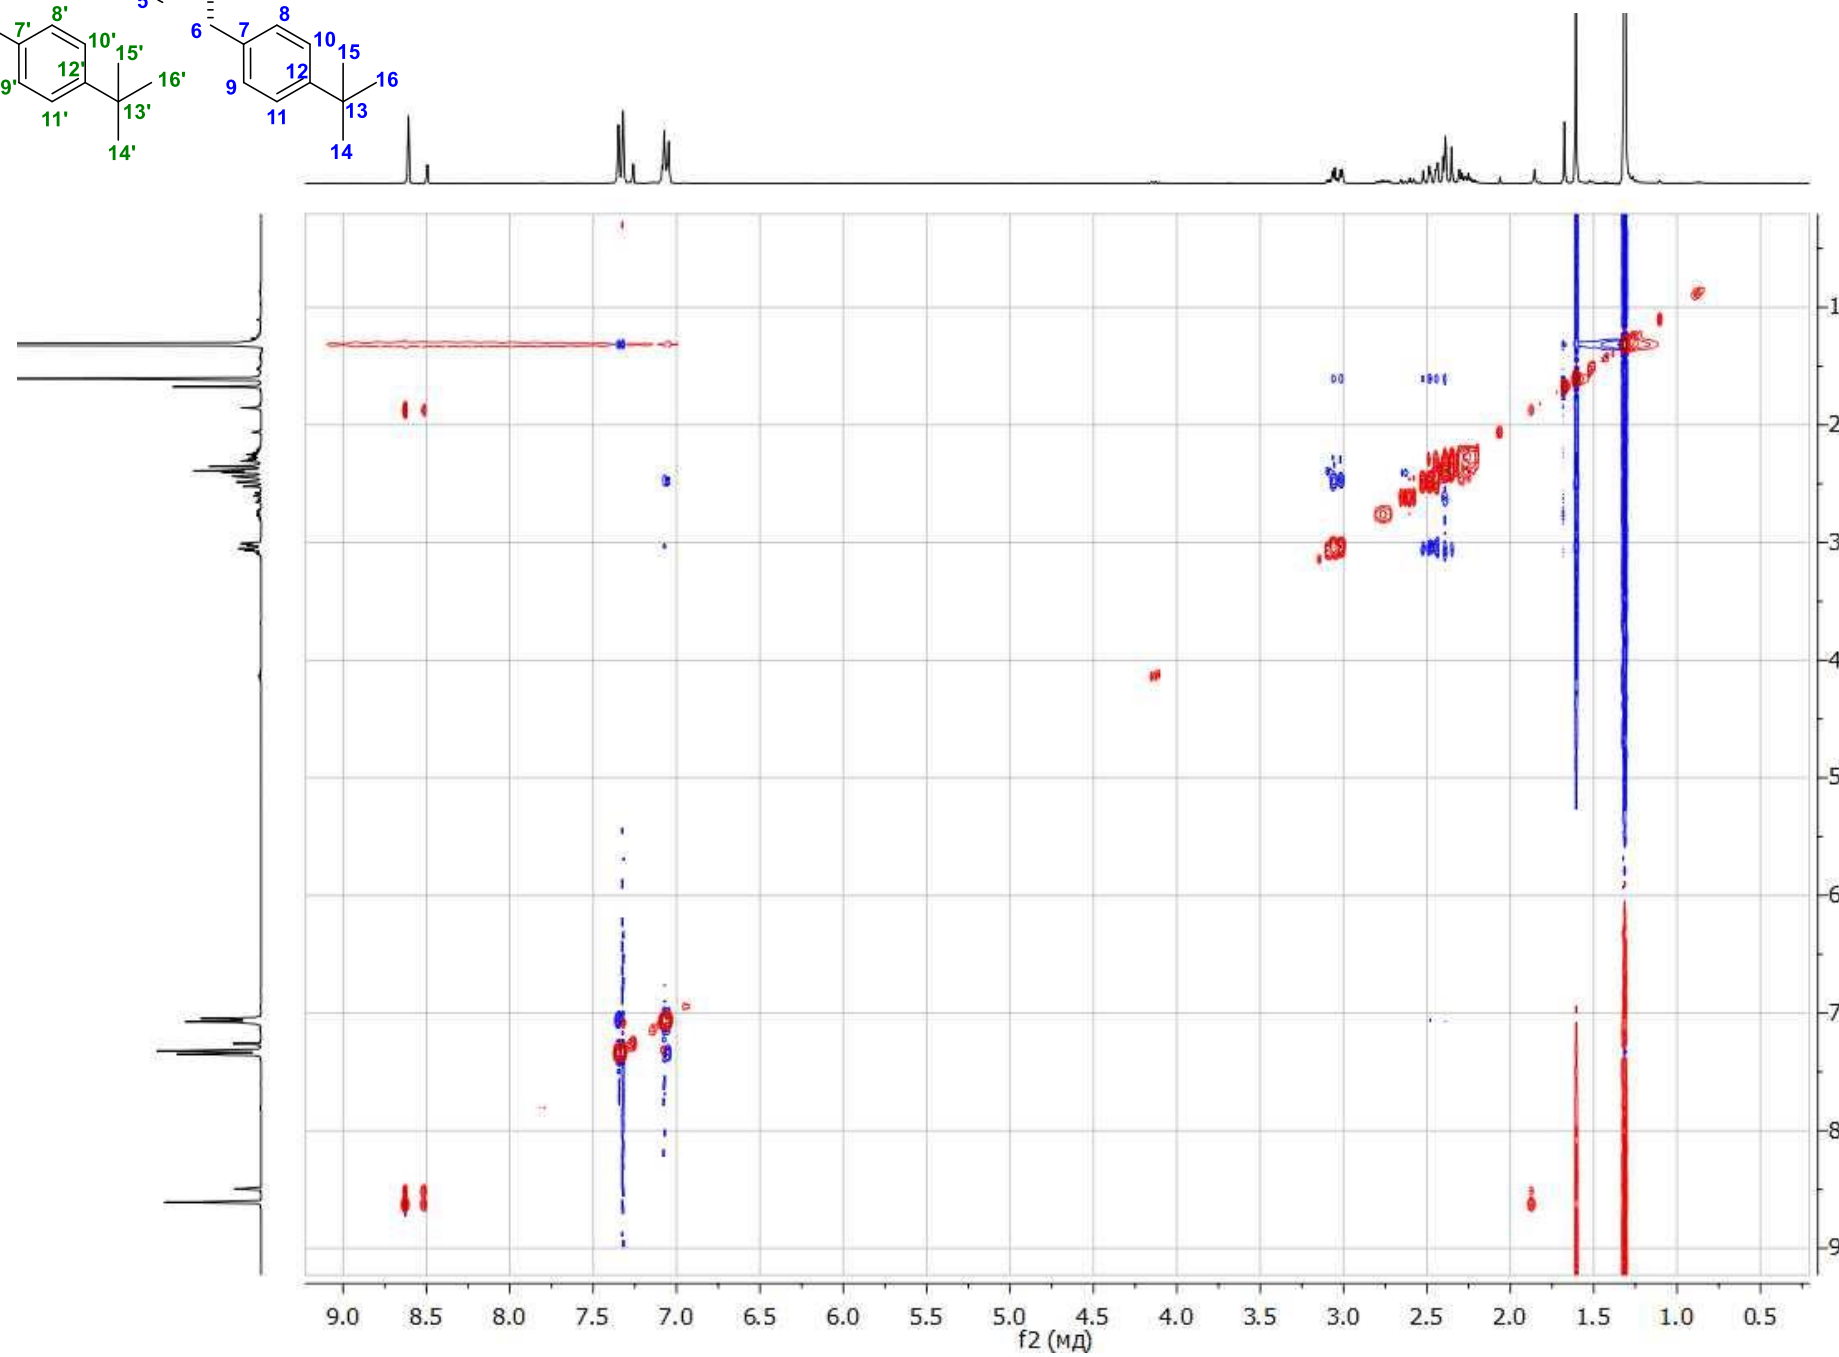

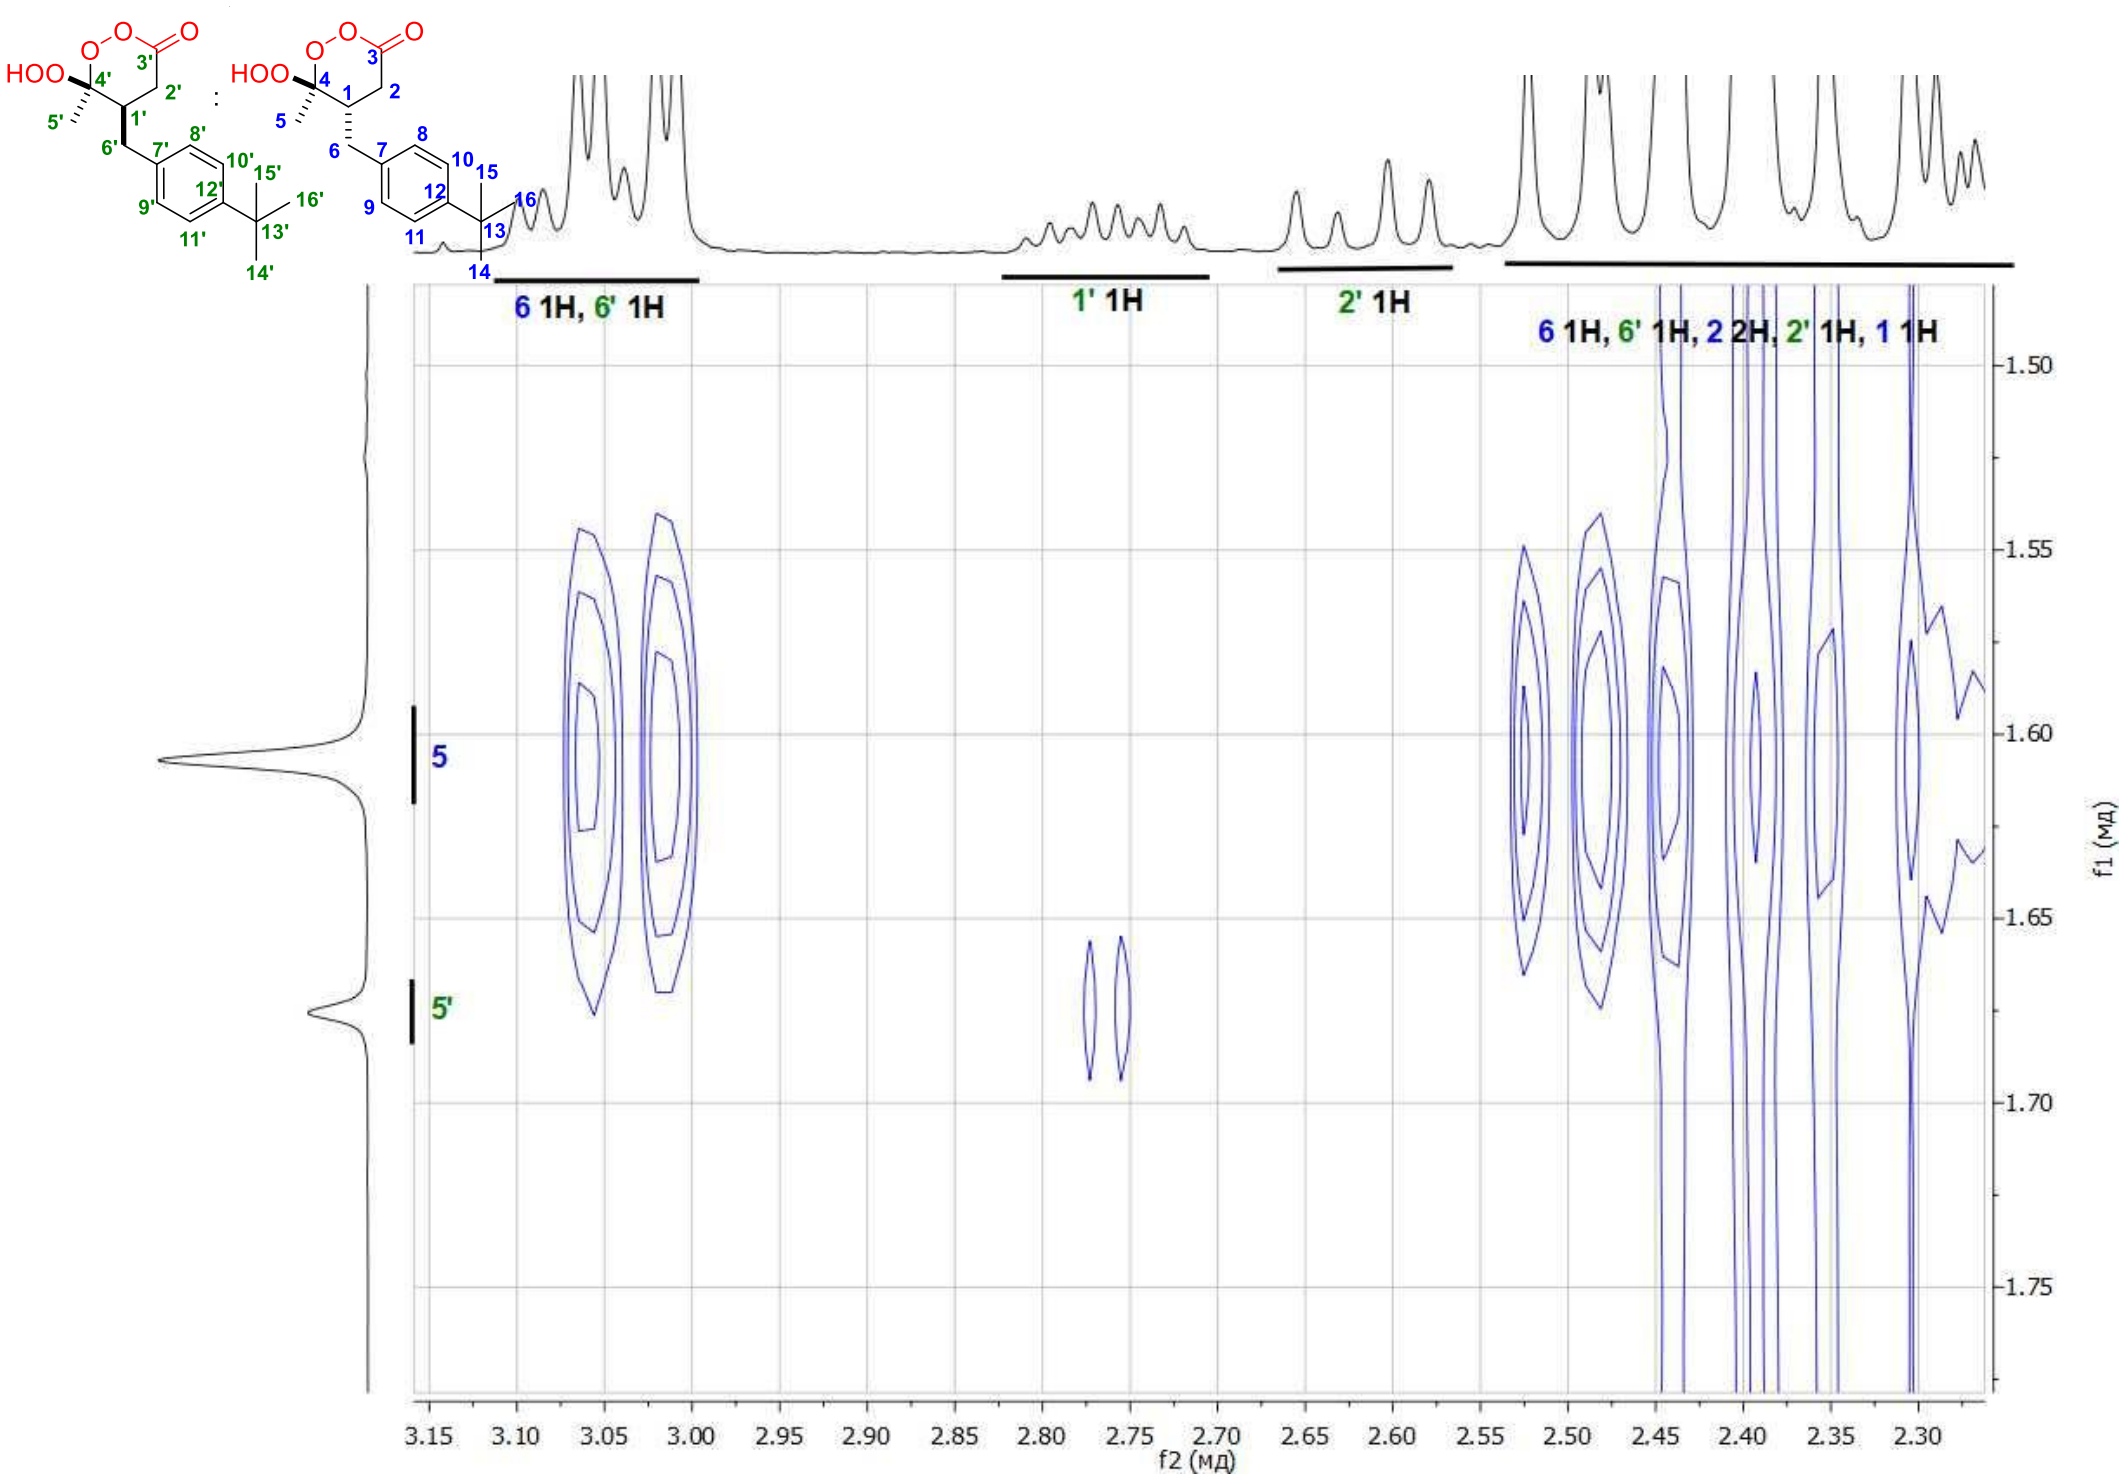

{<sup>1</sup>H-<sup>13</sup>C} HSQC

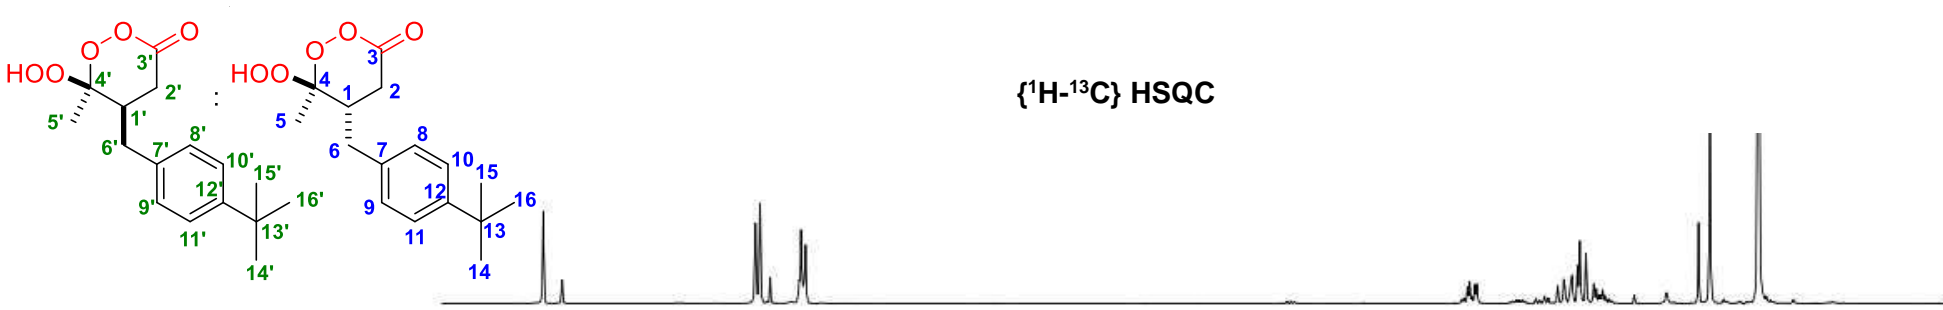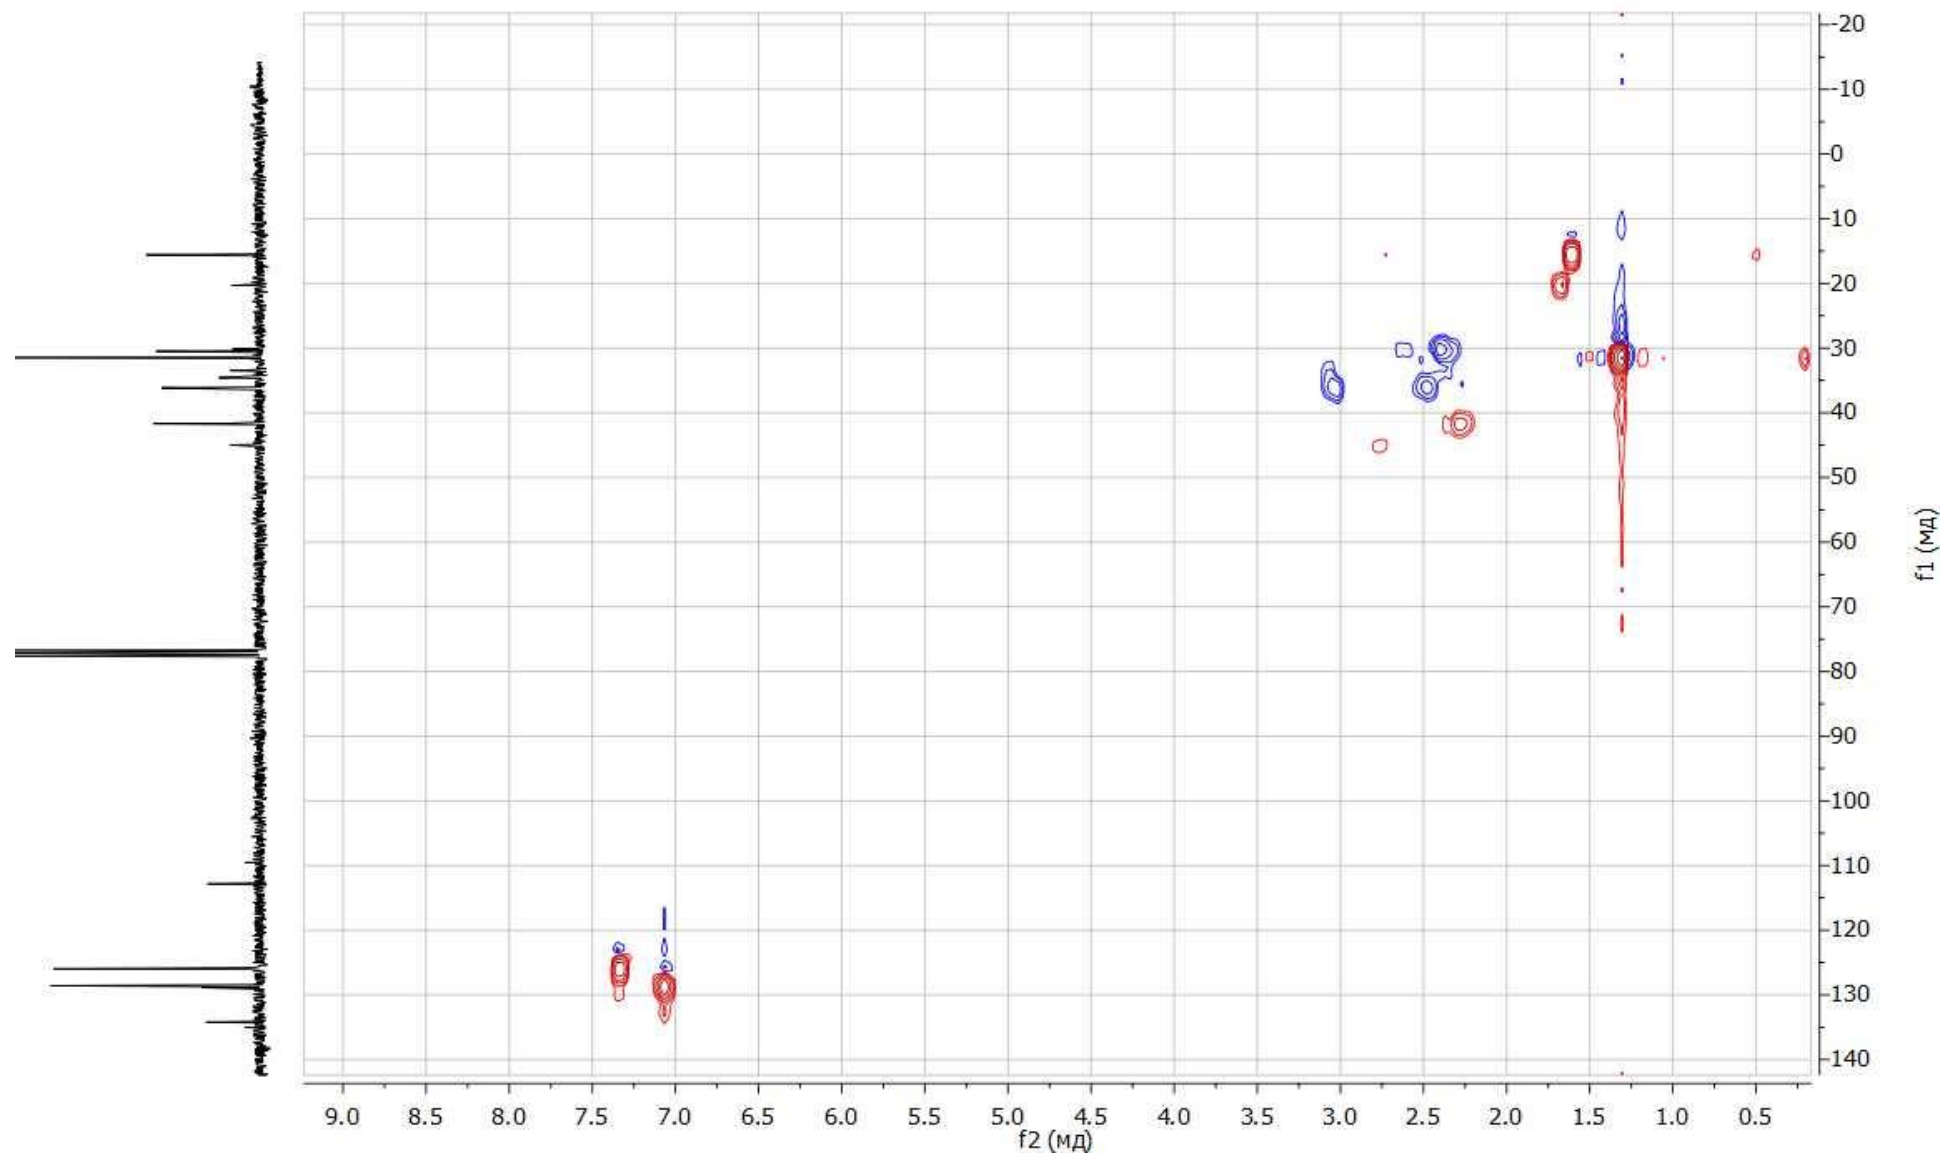

{<sup>1</sup>H-<sup>13</sup>C} HMBC

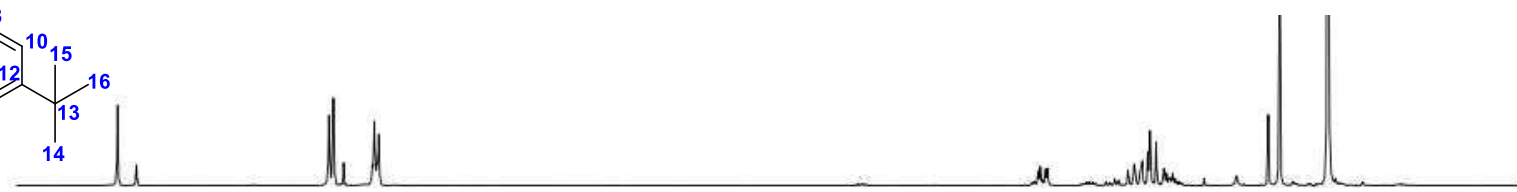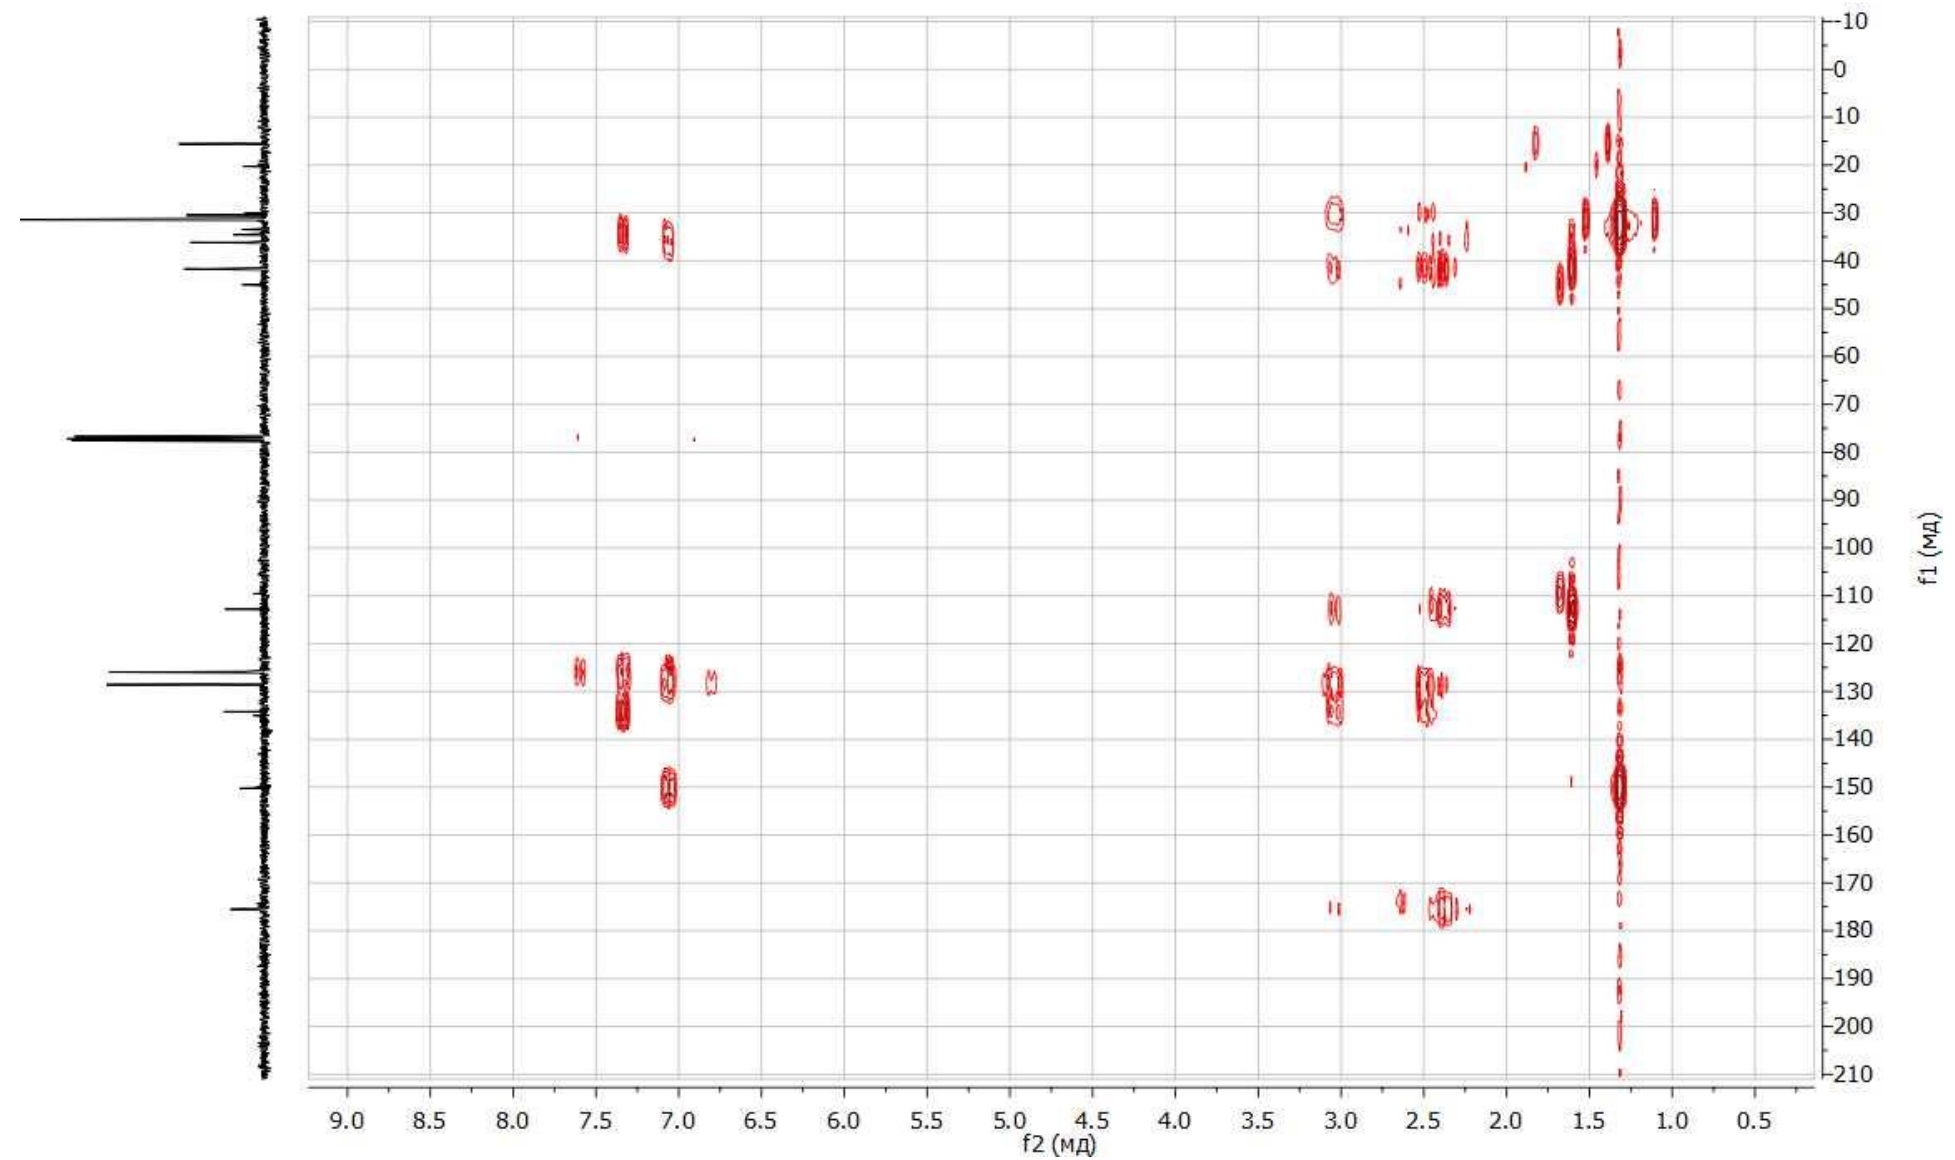

6-Hydroperoxy-6-methyl-5-(4-methylbenzyl)-1,2-dioxan-3-one, 2f

<sup>1</sup>H NMR

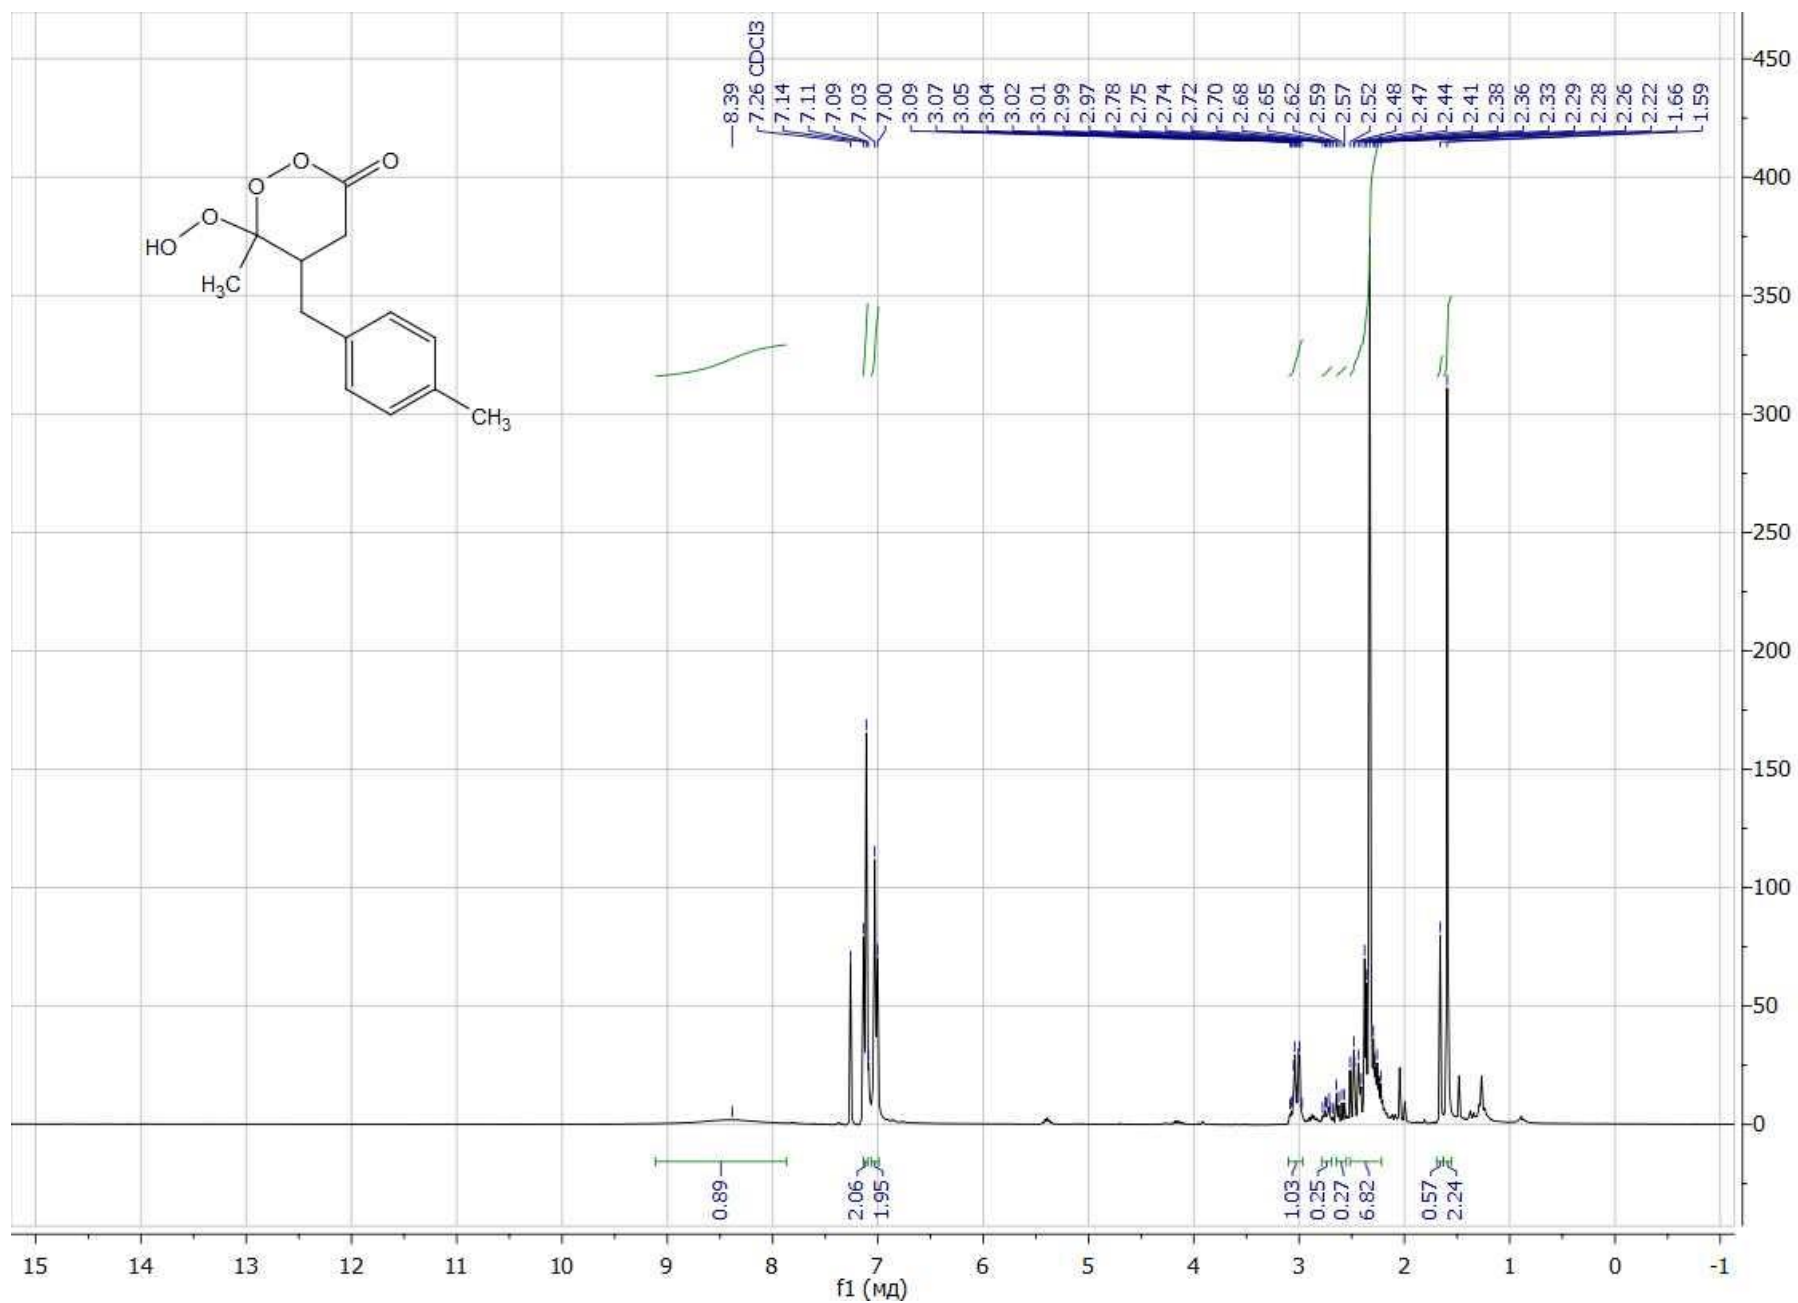

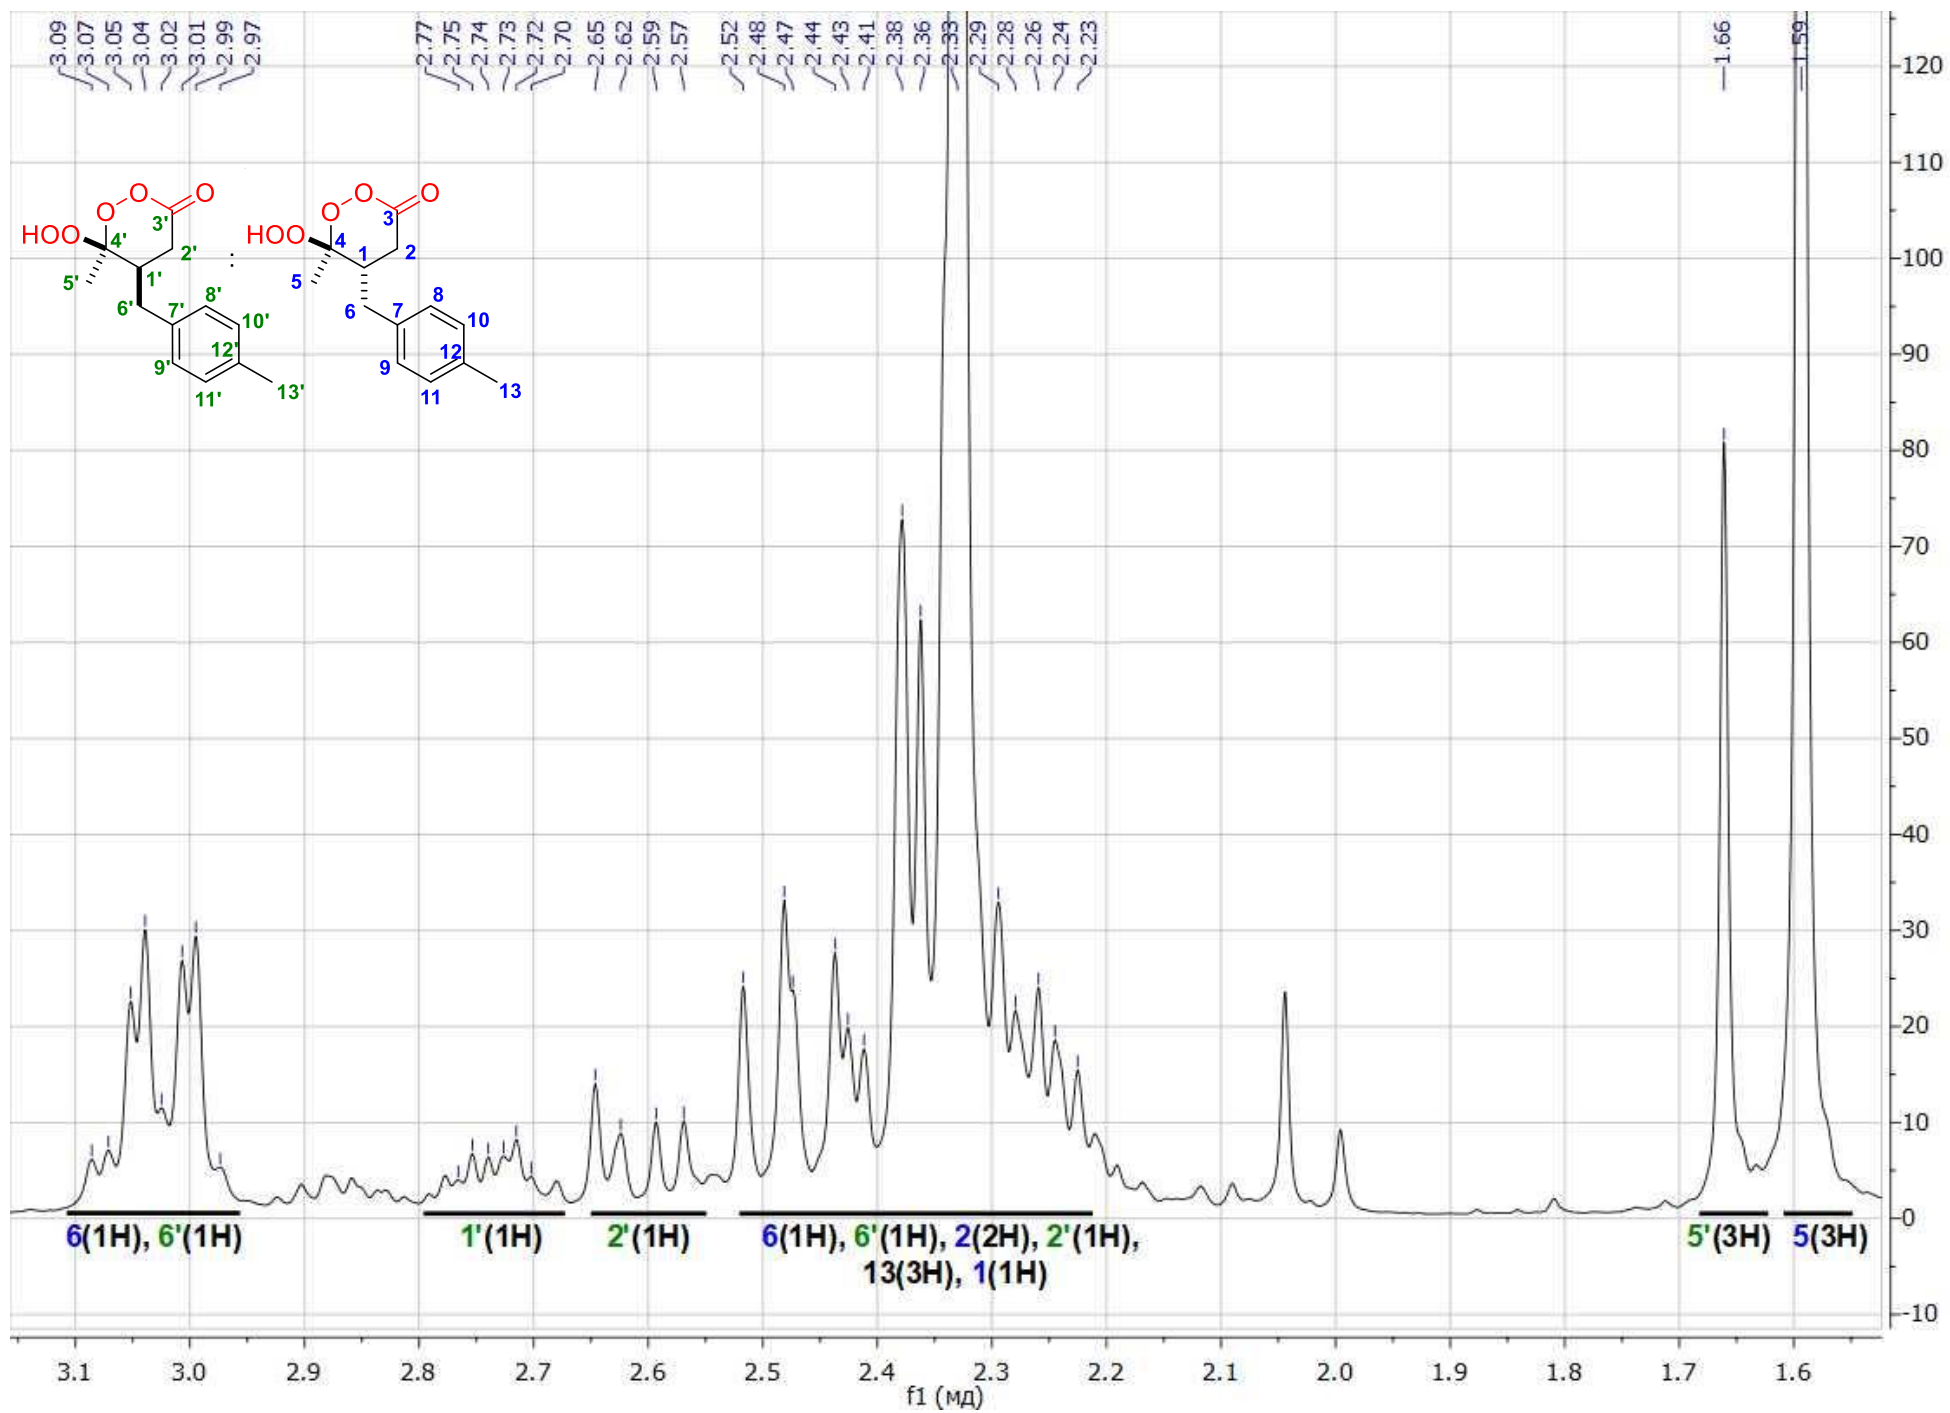

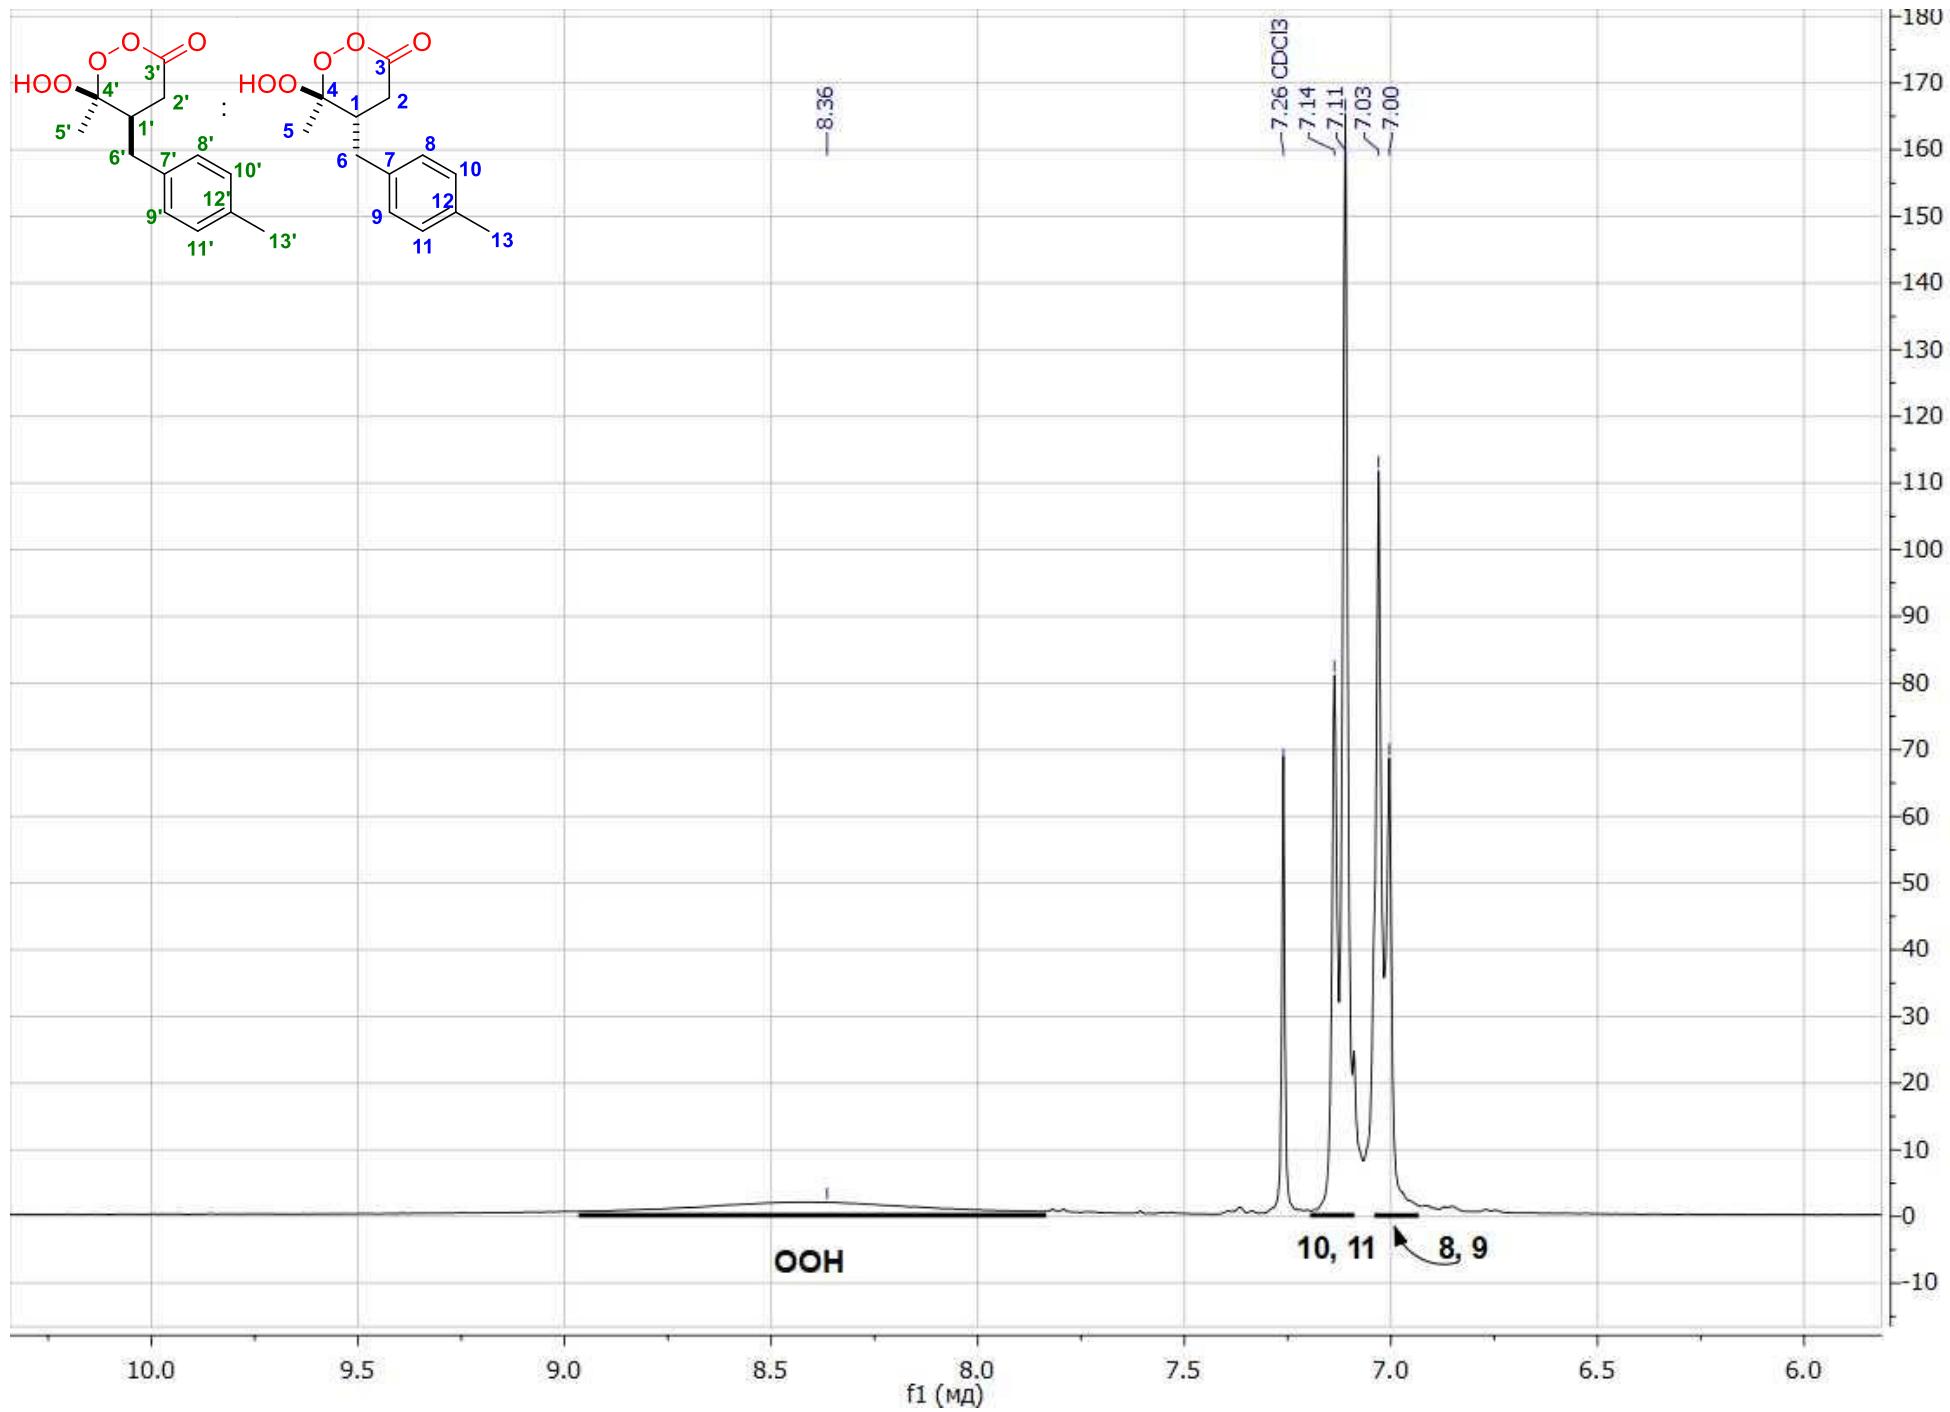



<sup>13</sup>C NMR

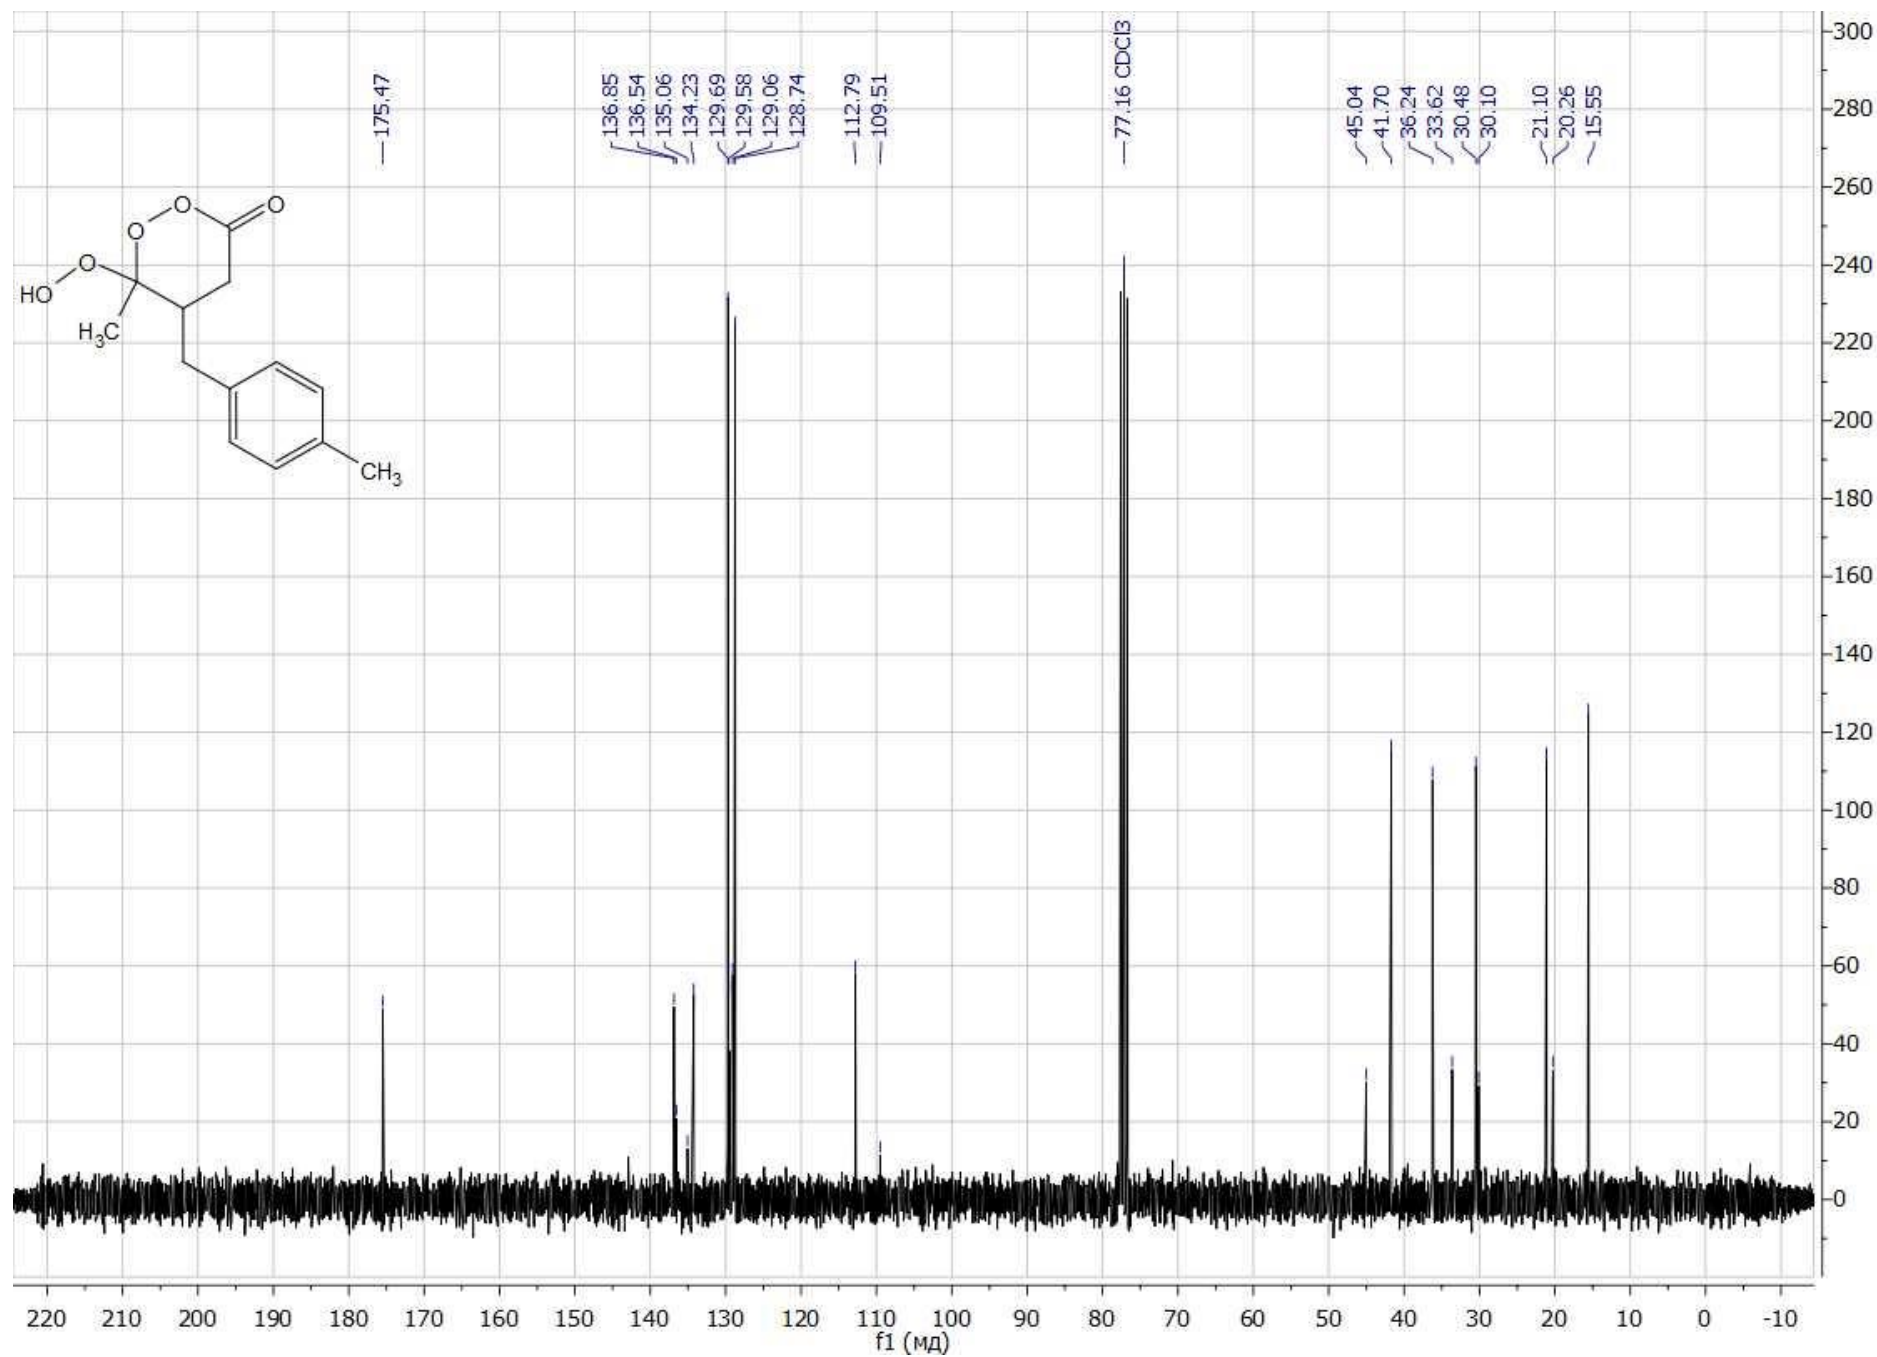

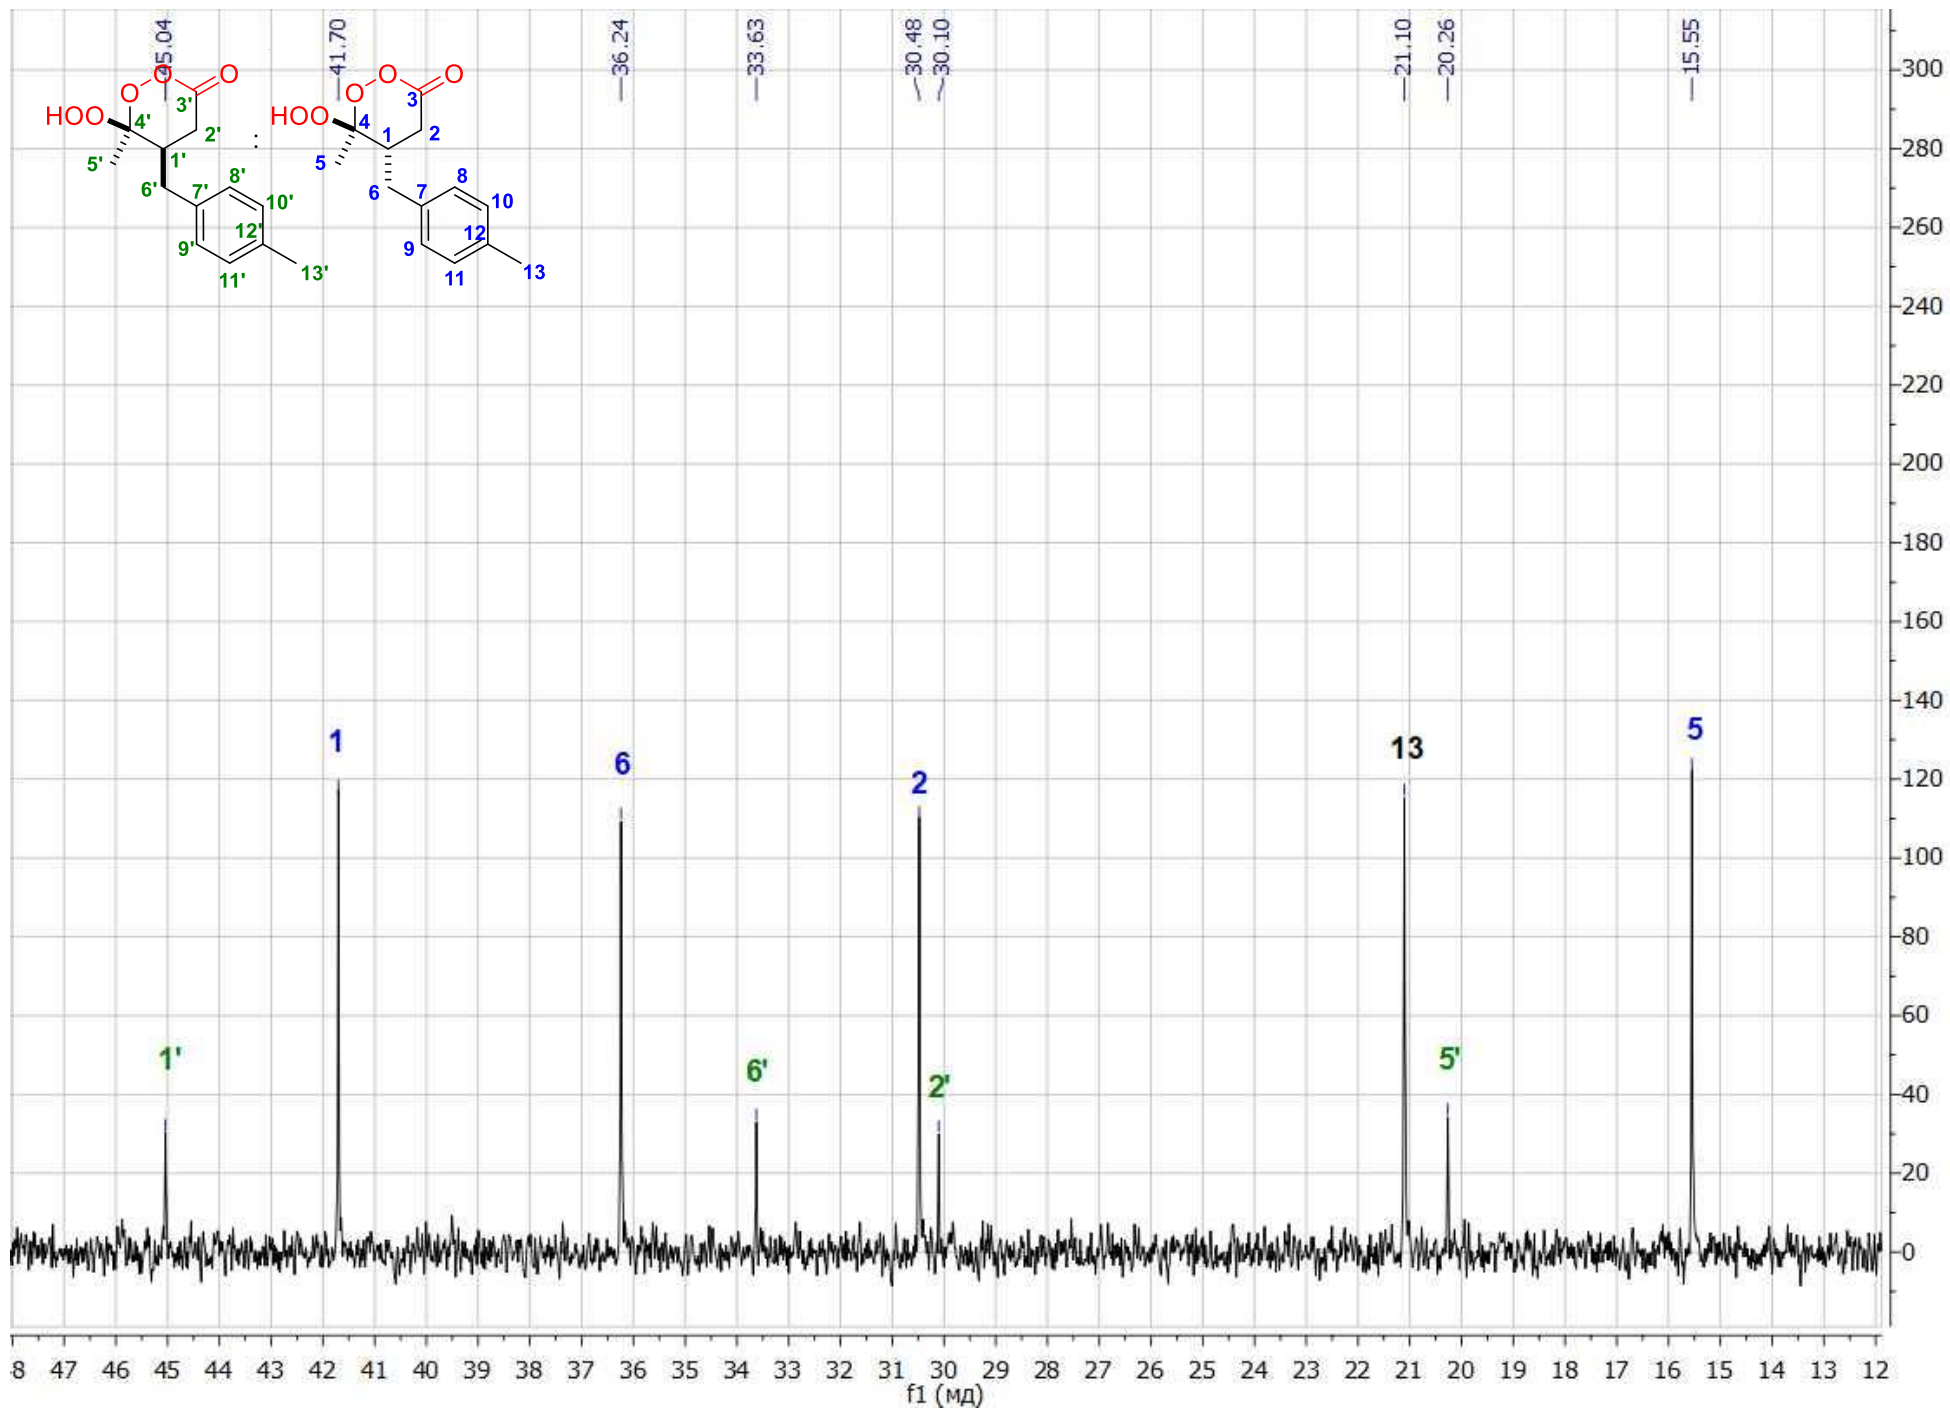

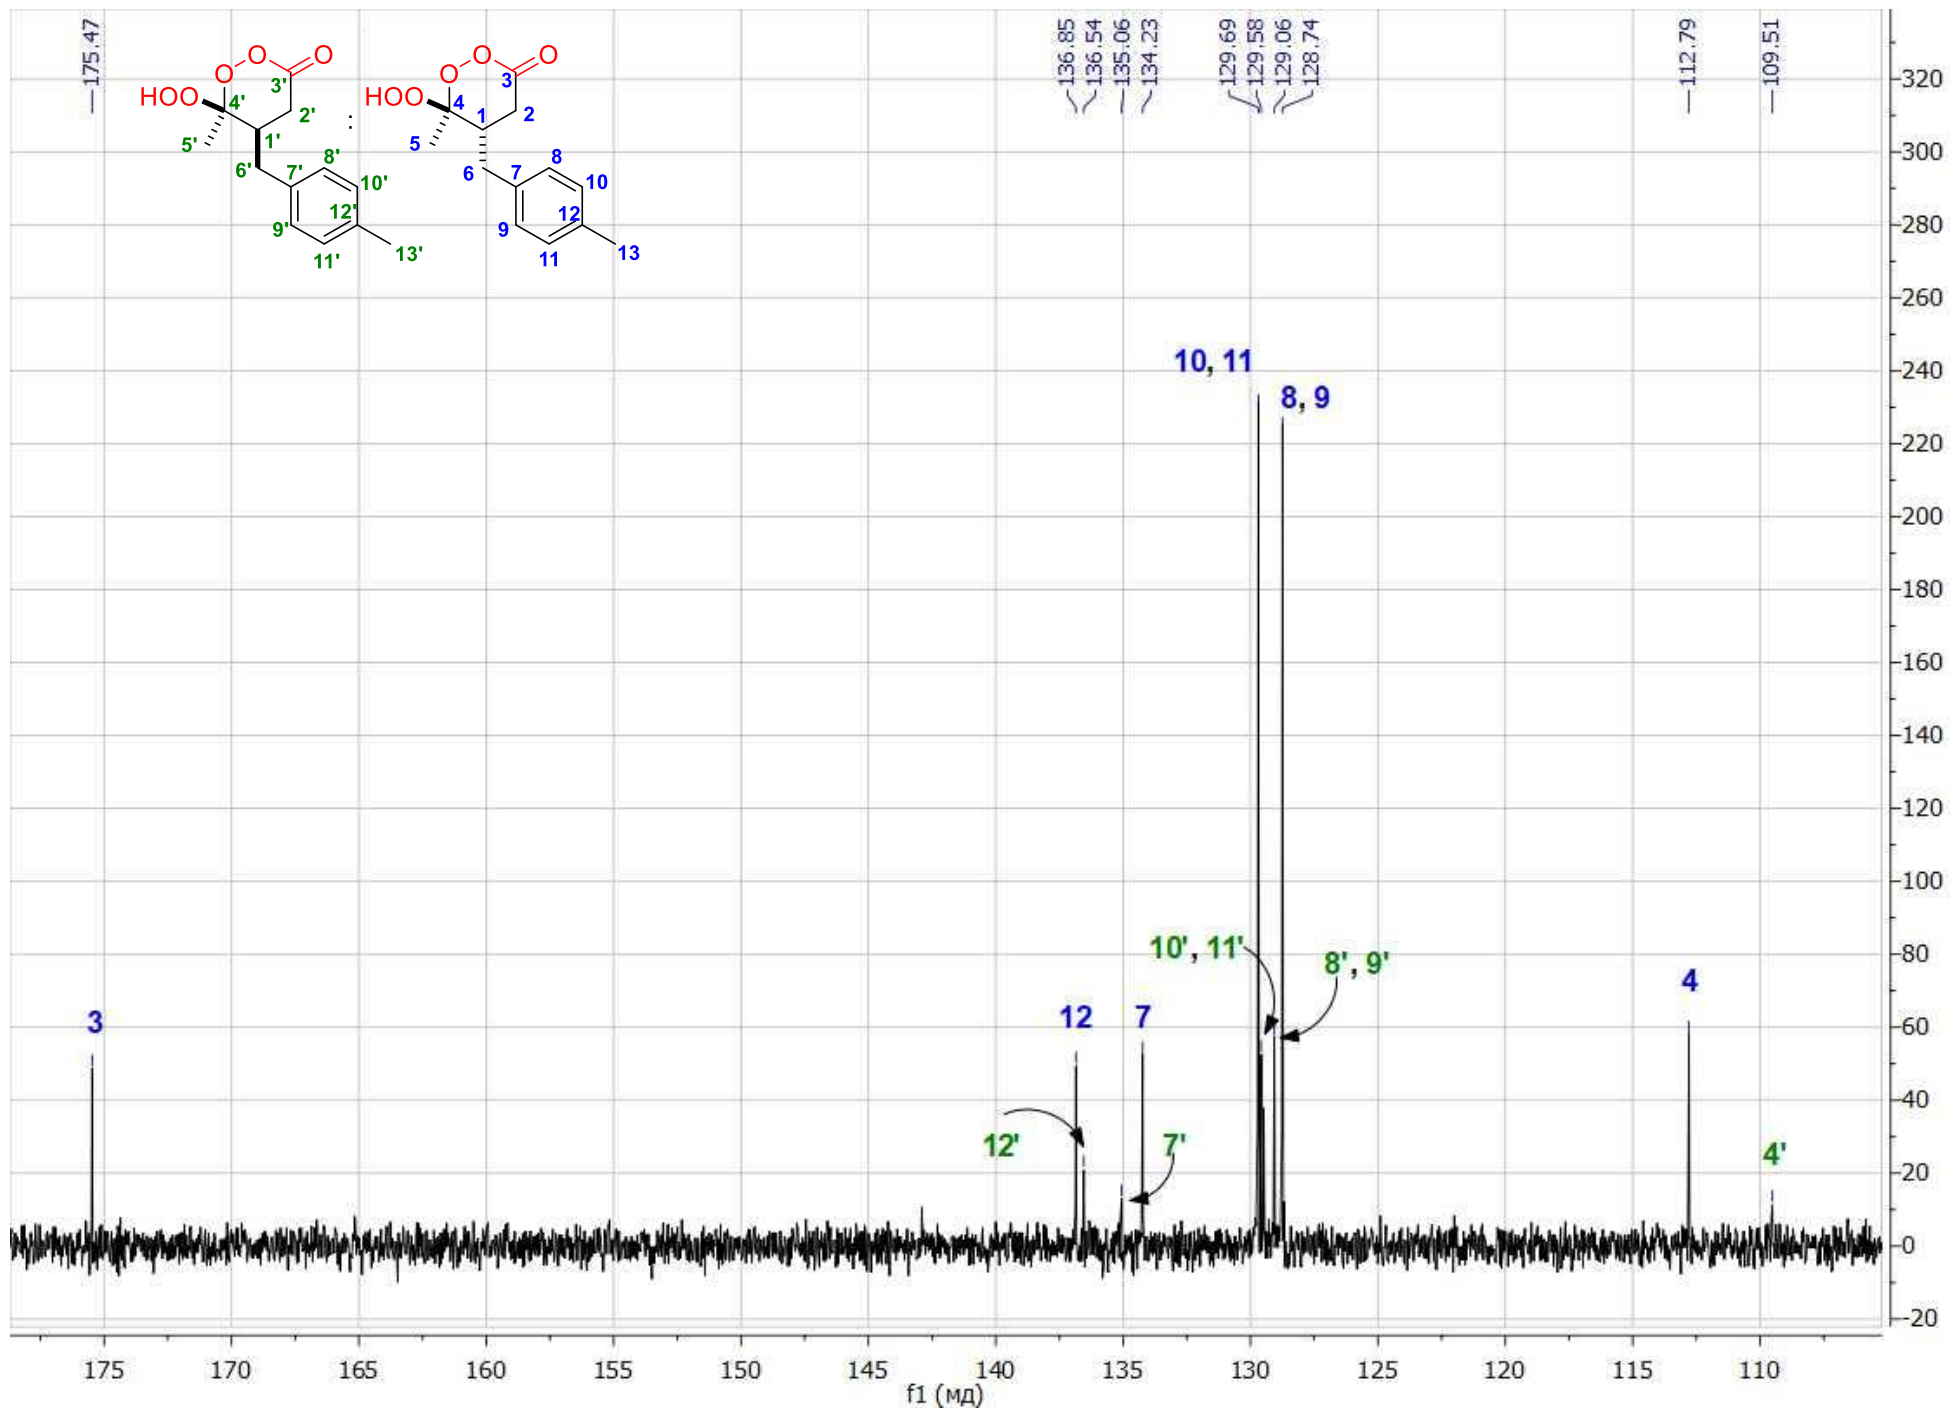

<sup>13</sup>C\_deptsp135

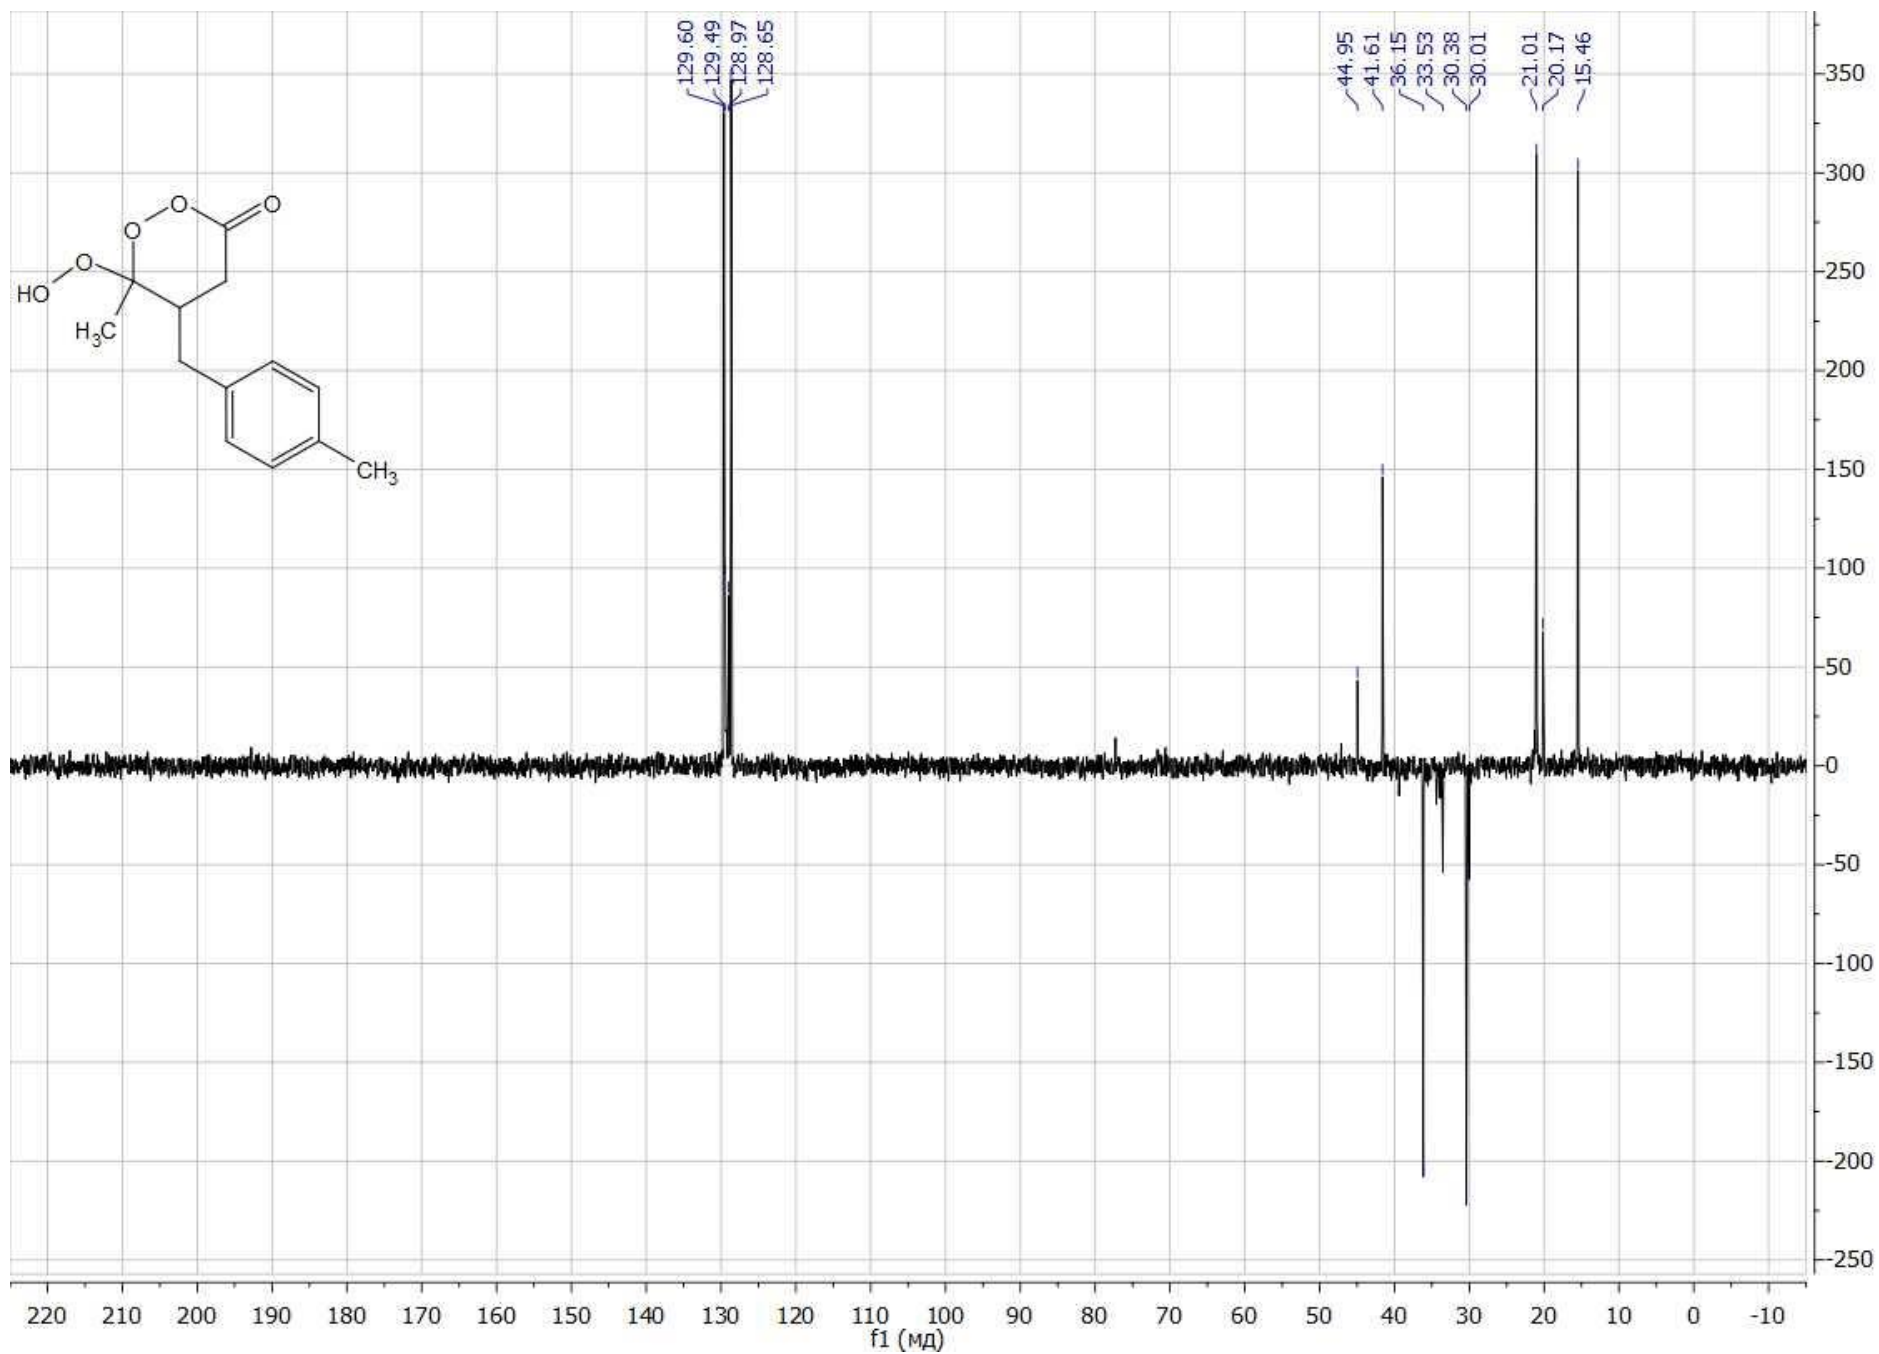

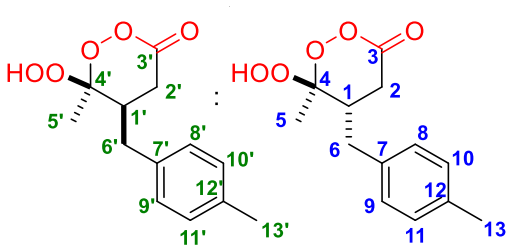

{<sup>1</sup>H-<sup>1</sup>H} COSY

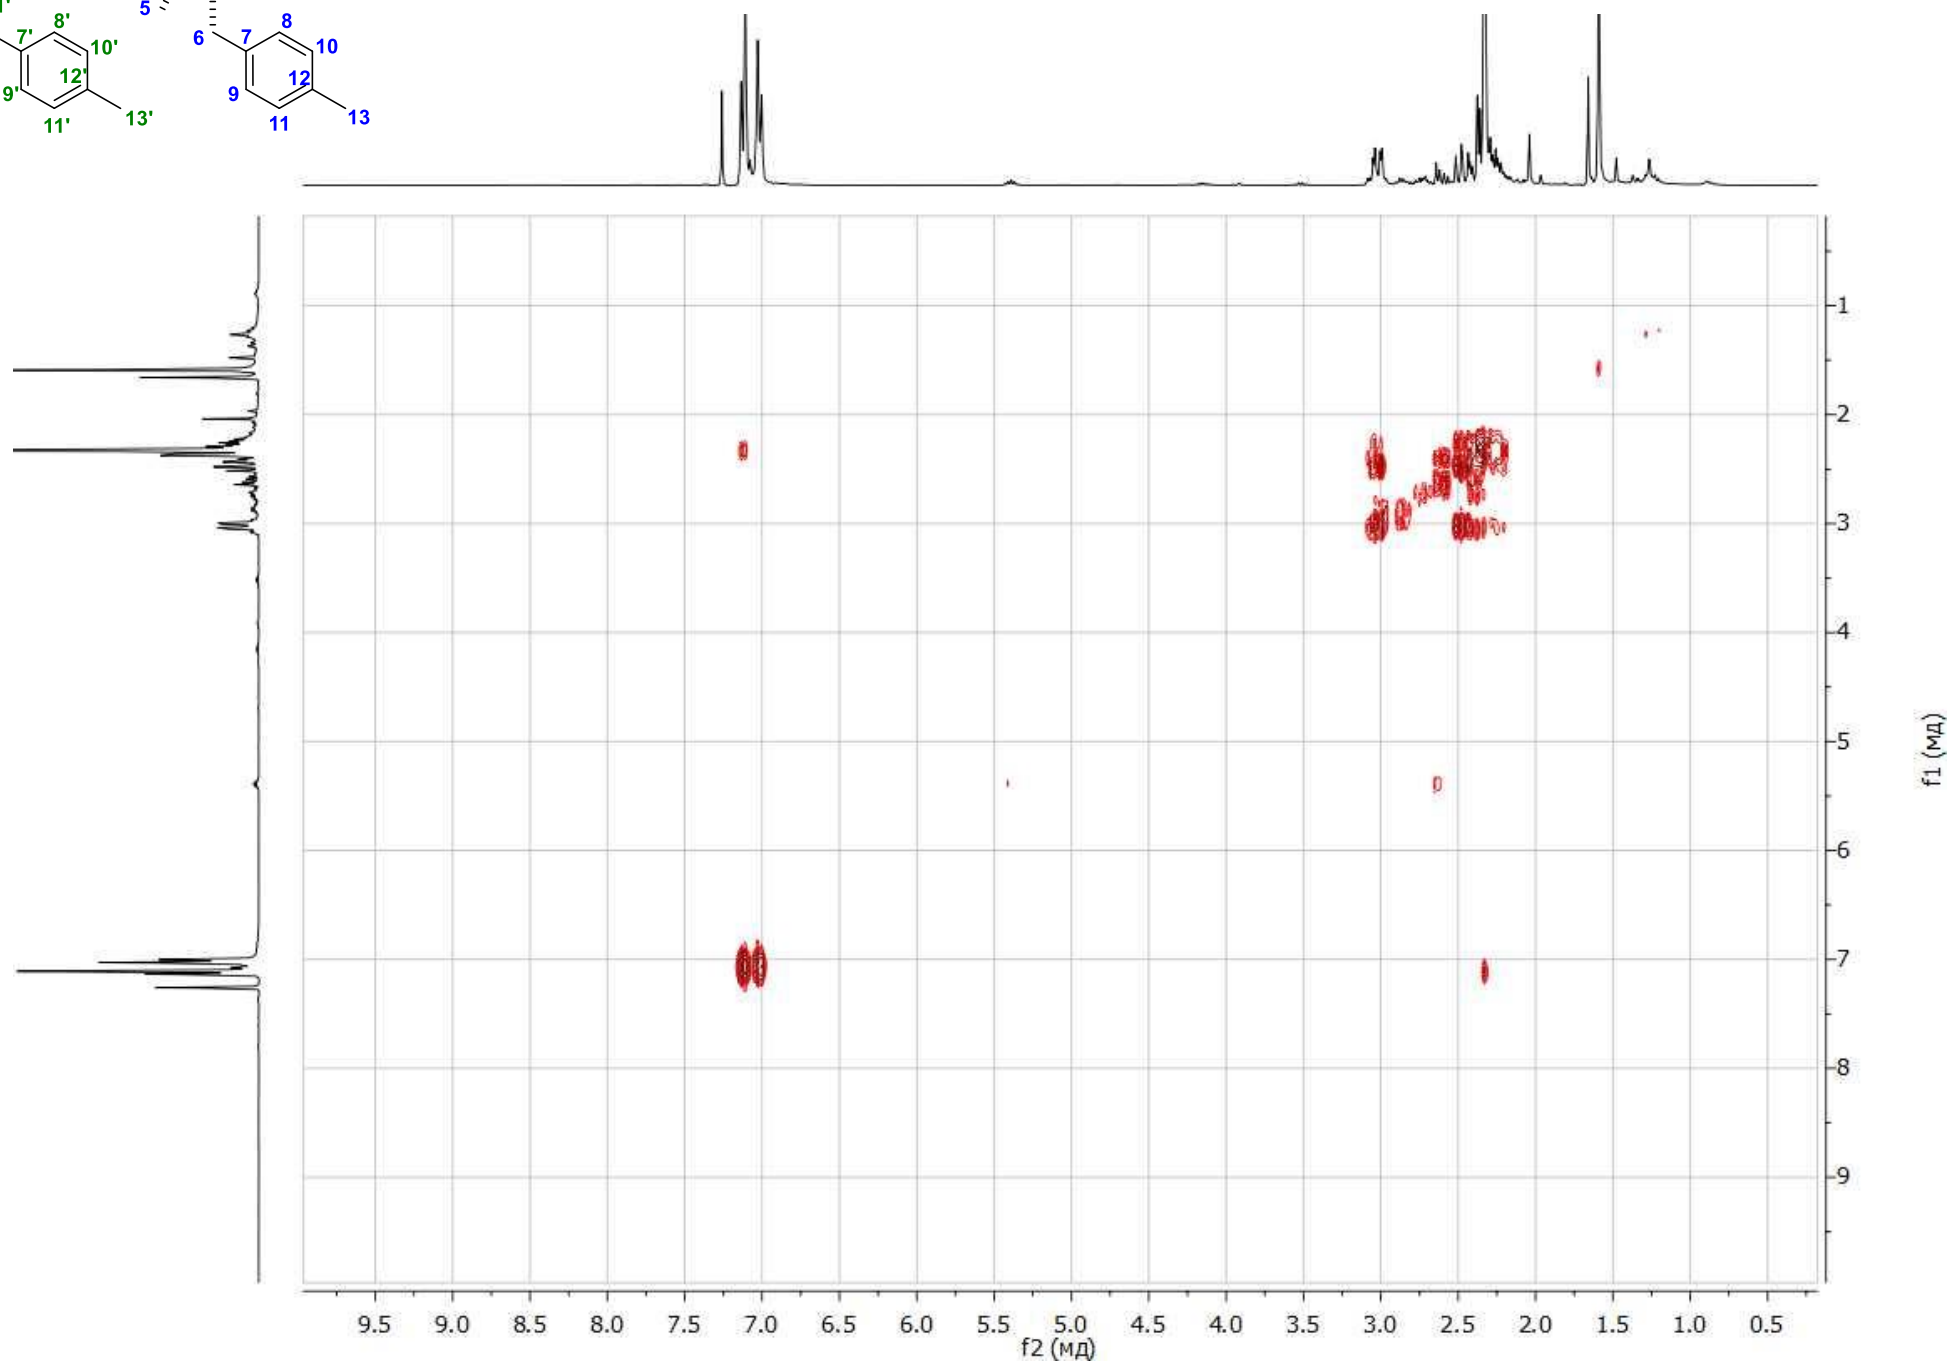

{<sup>1</sup>H-<sup>1</sup>H} NOESY

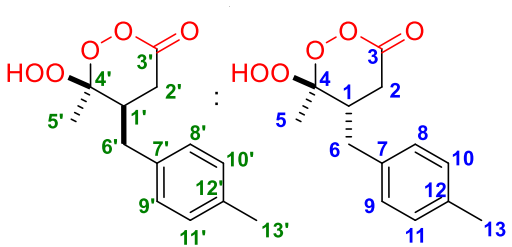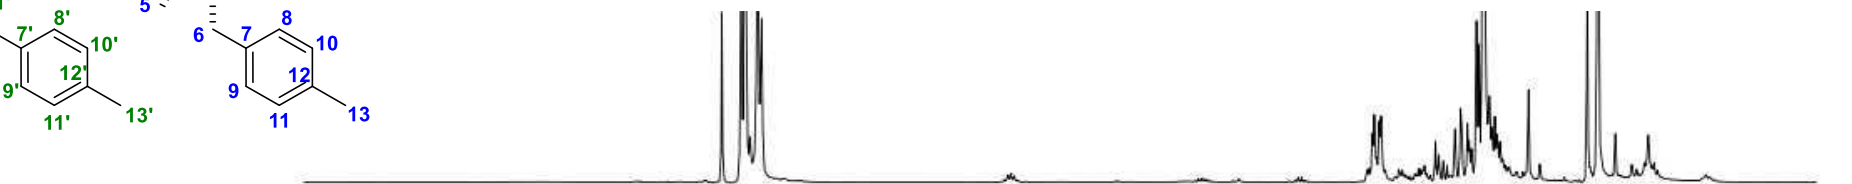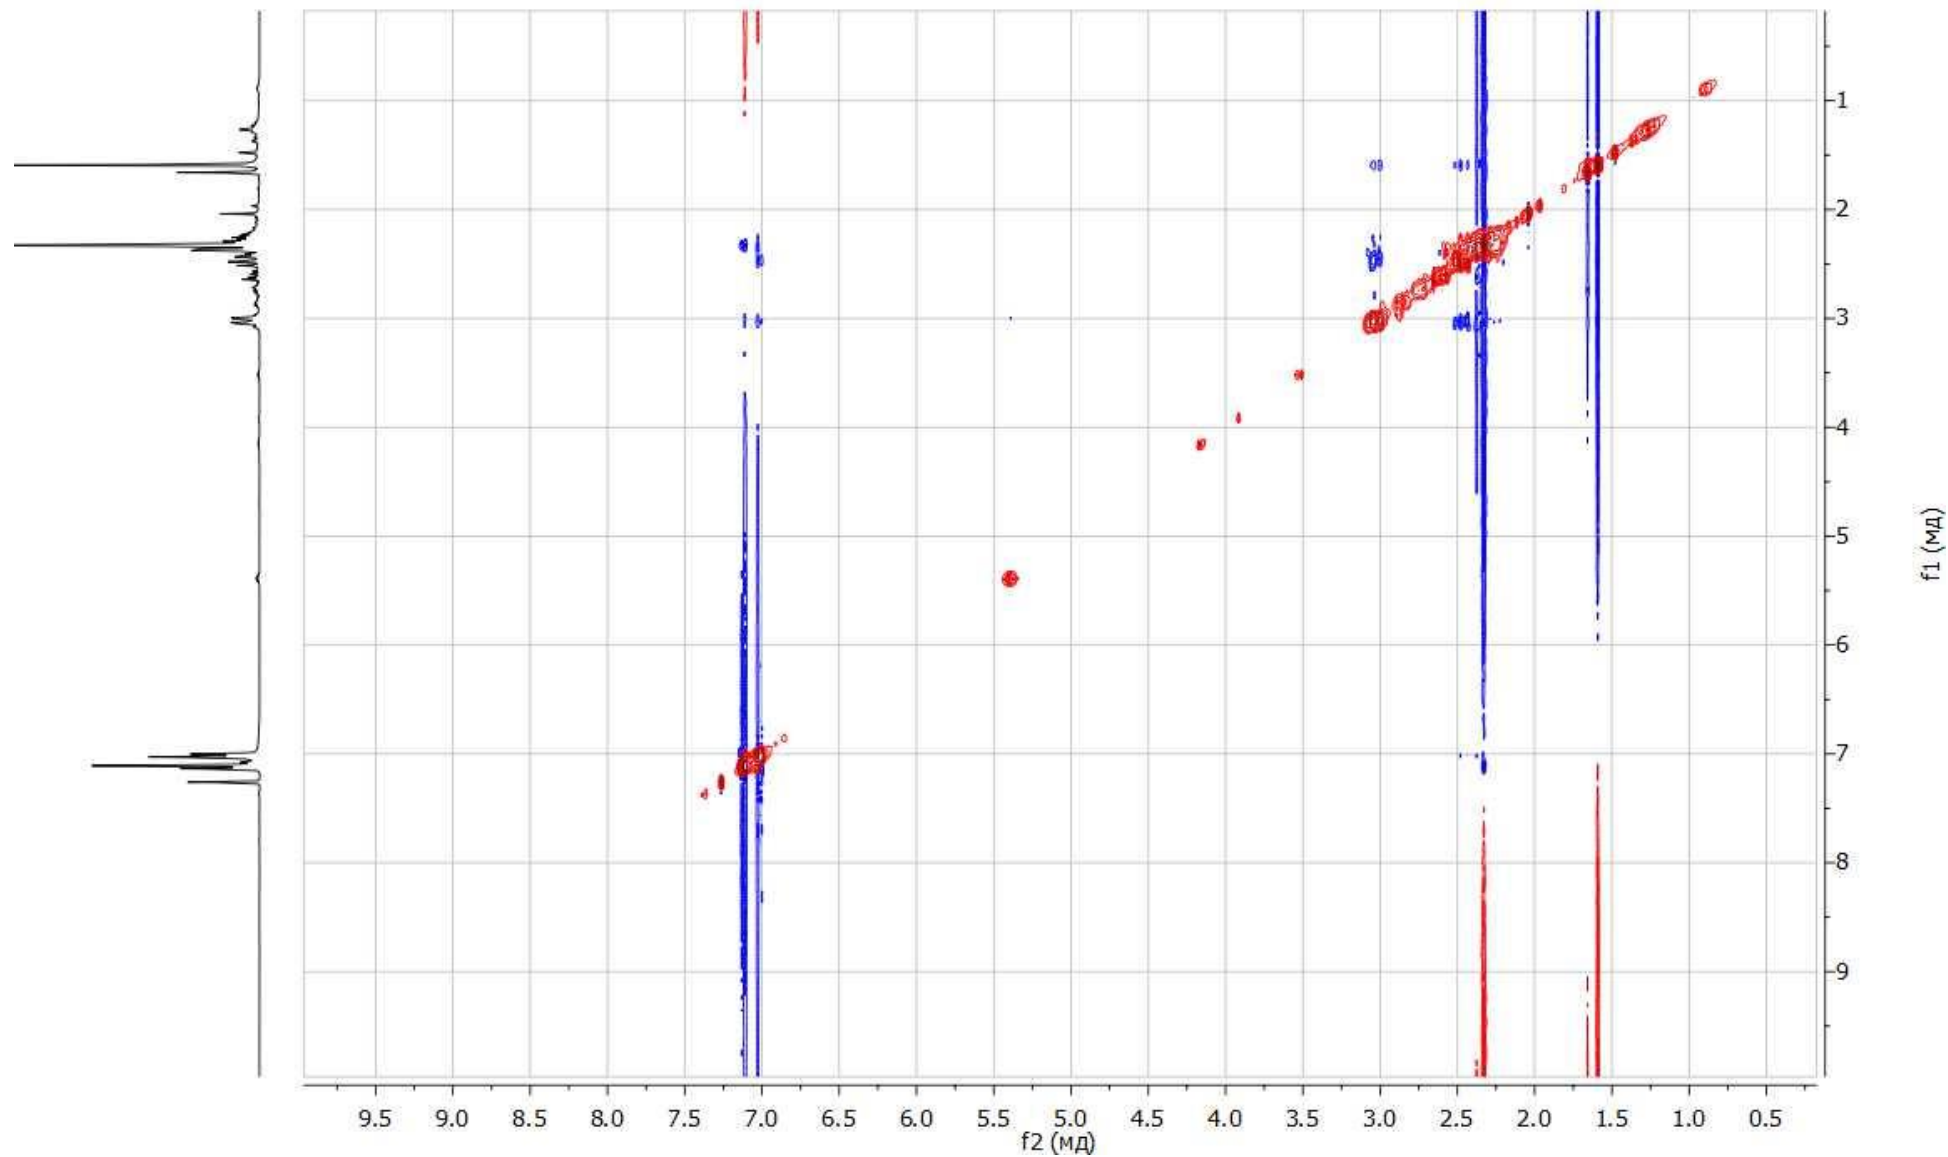

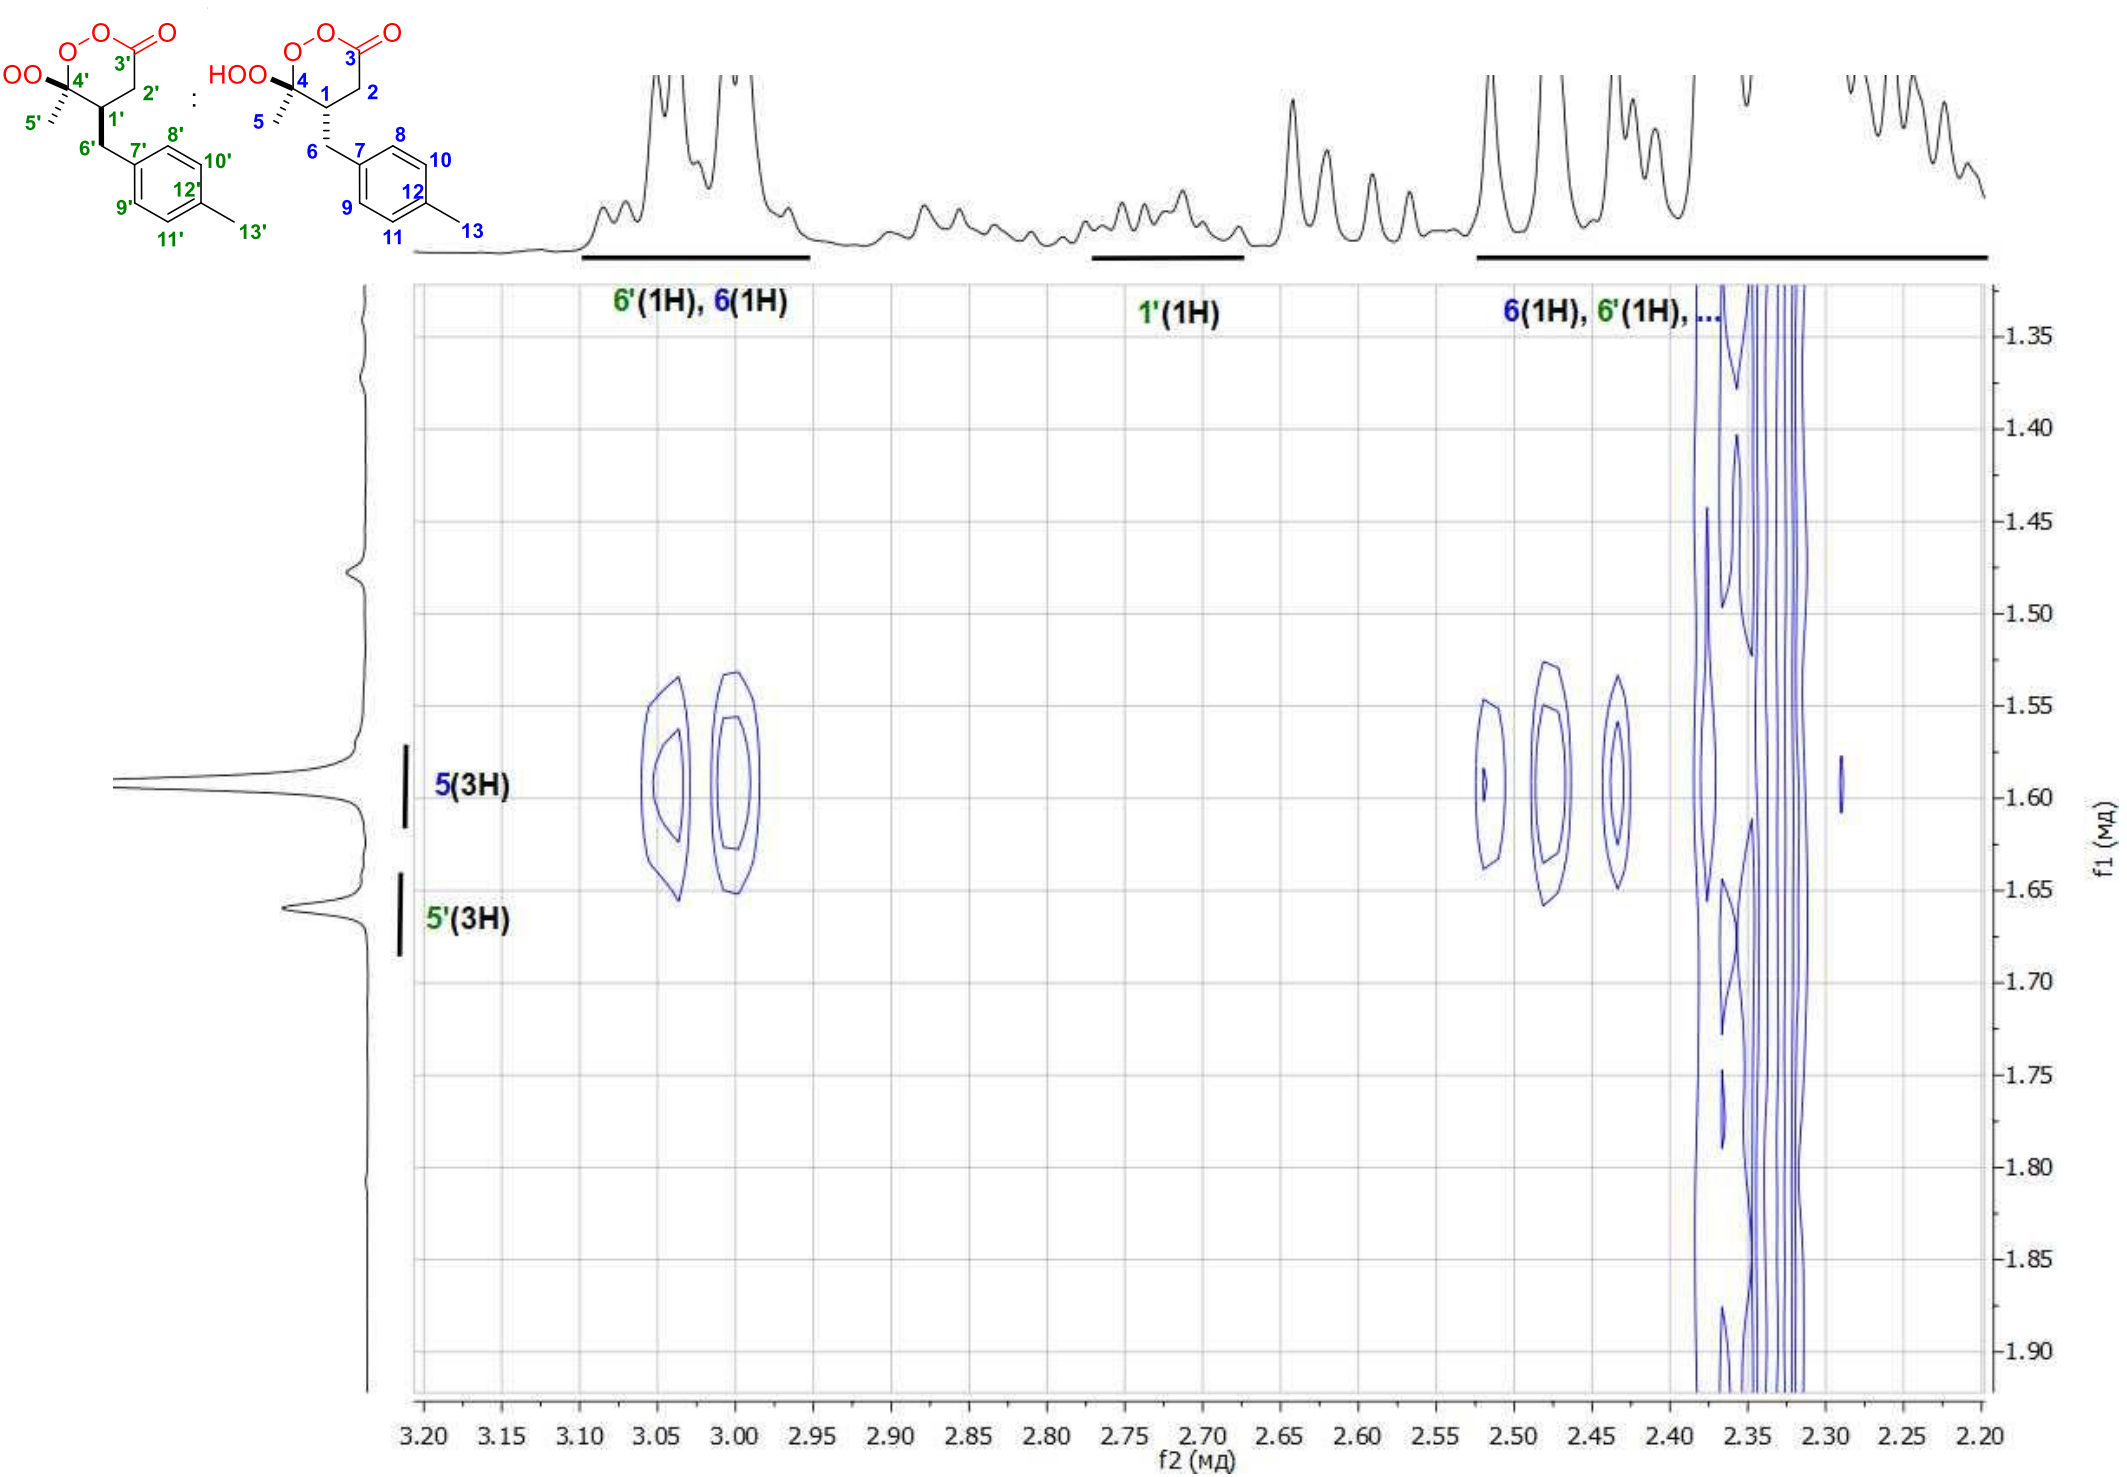

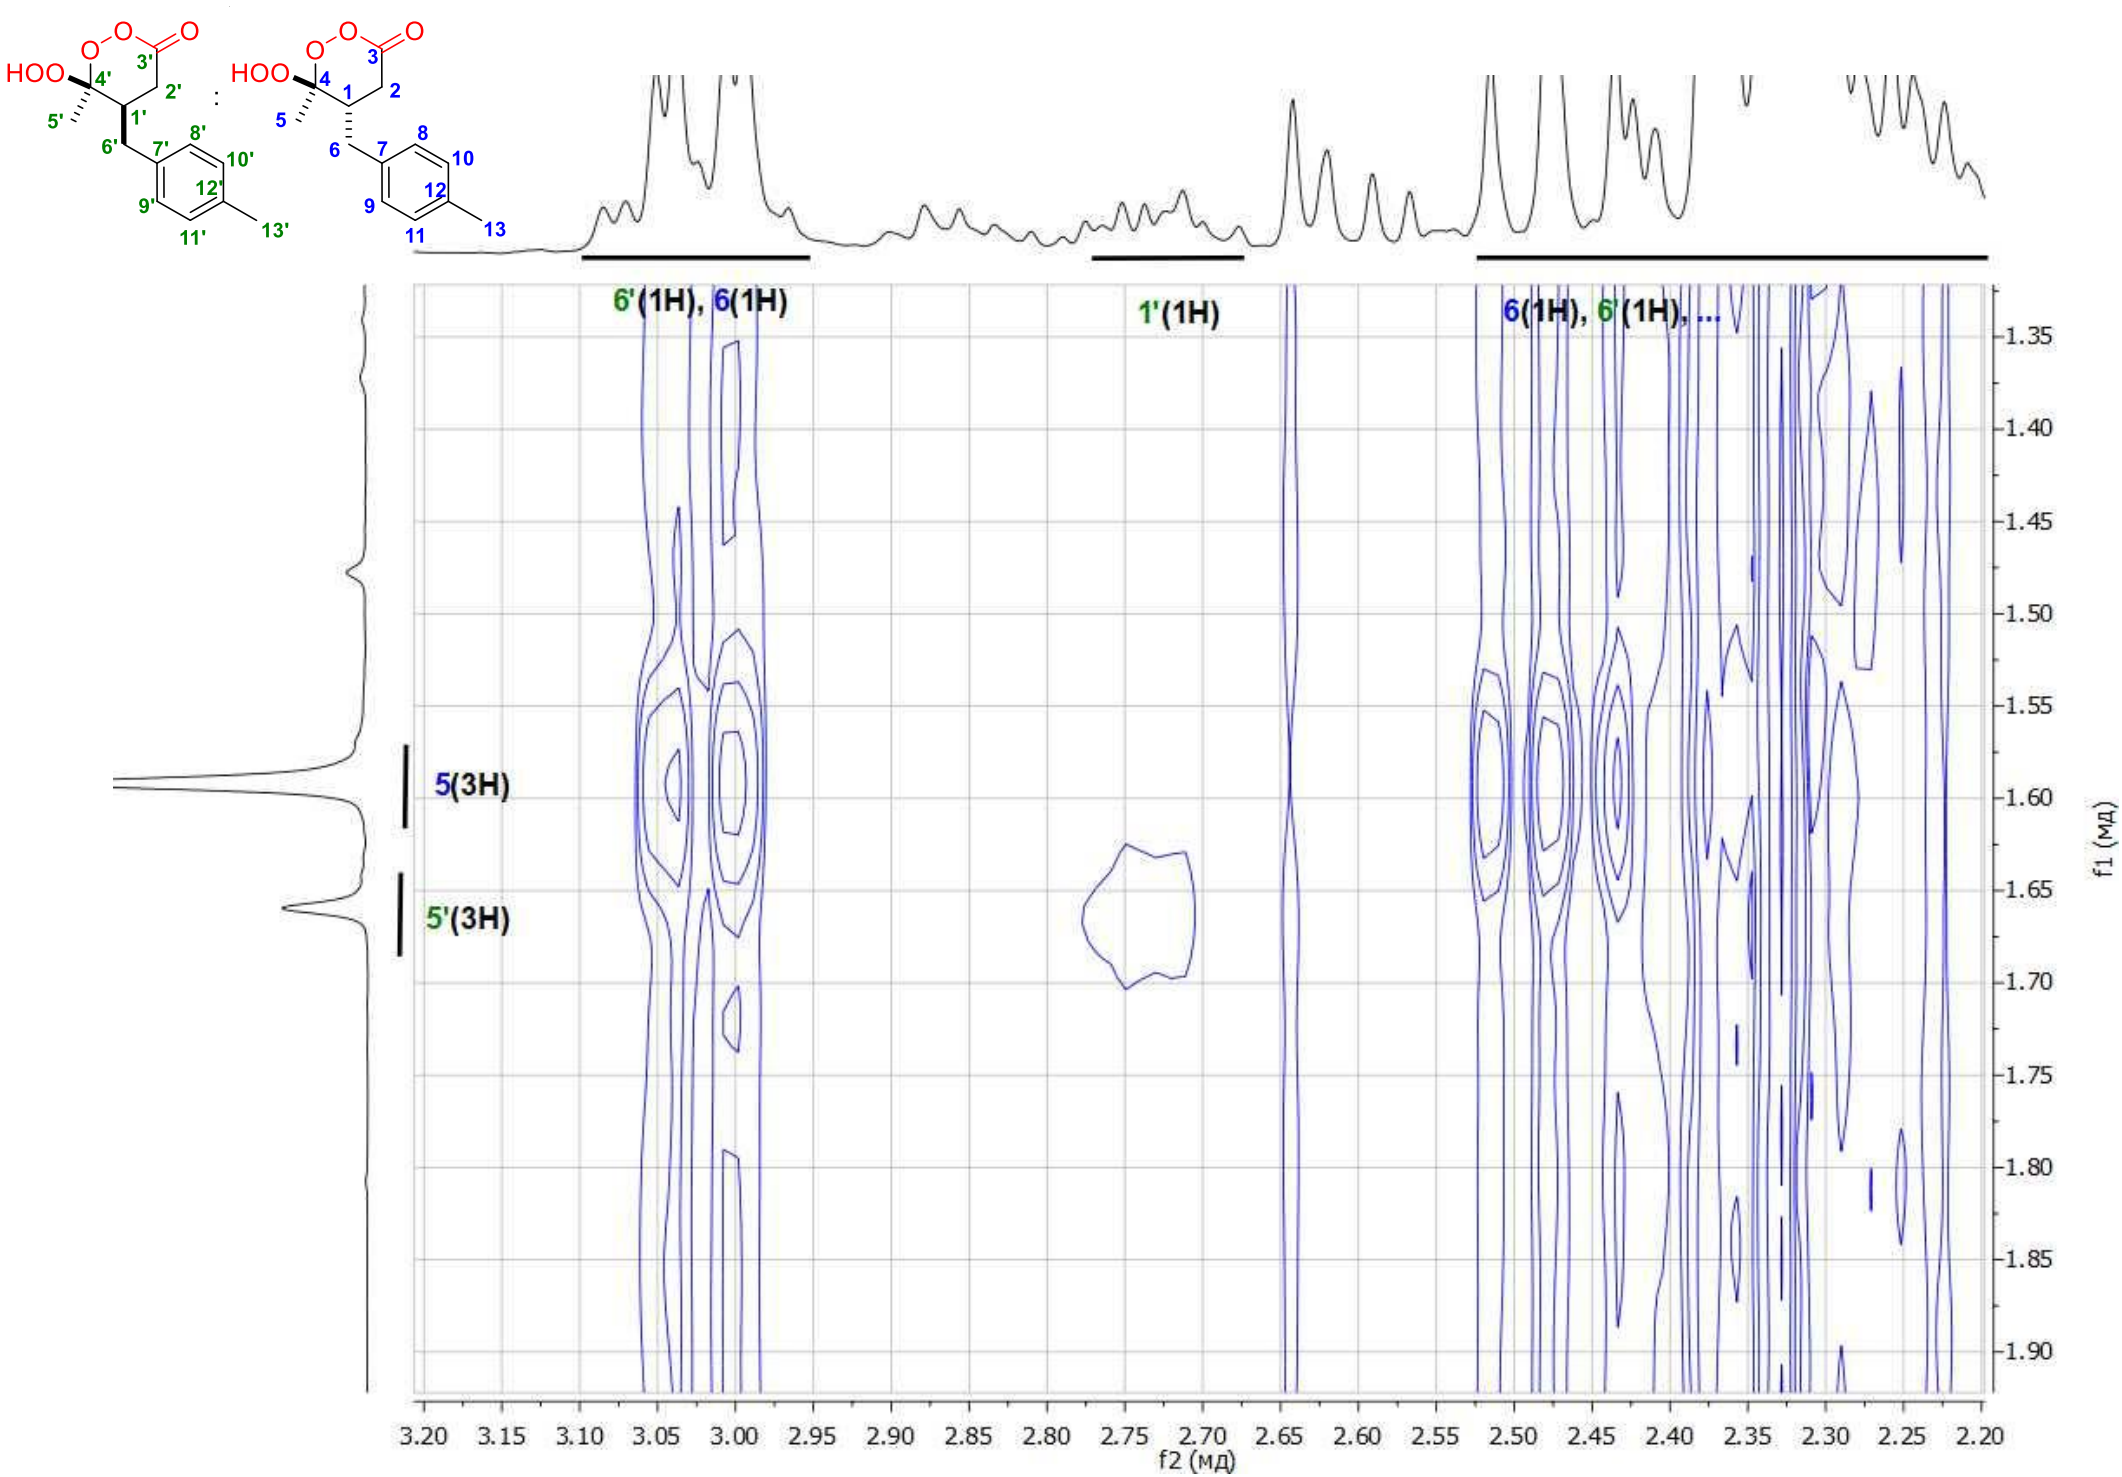





{<sup>1</sup>H-<sup>13</sup>C} HSQC

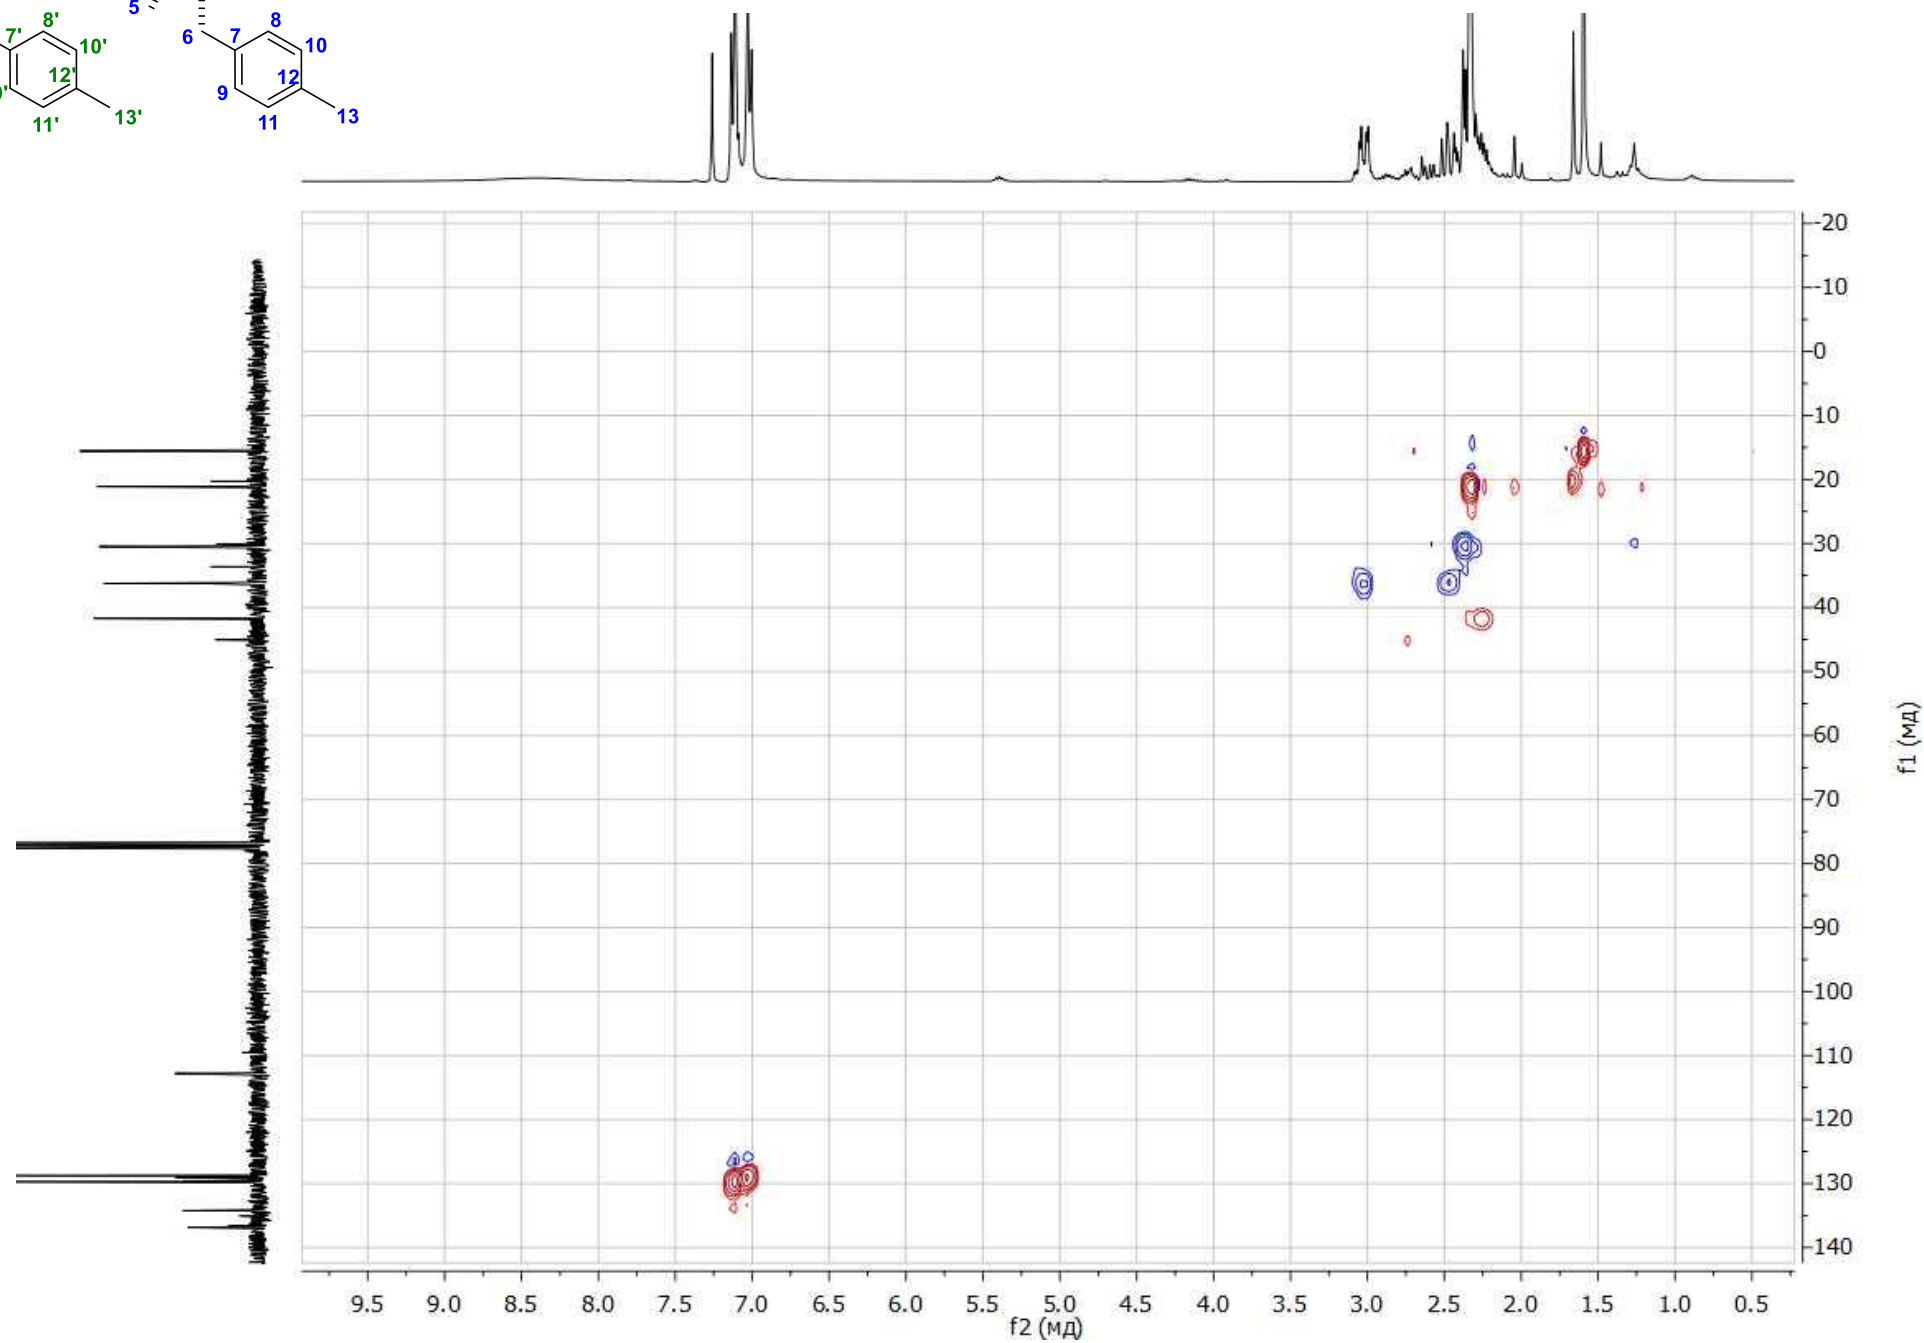

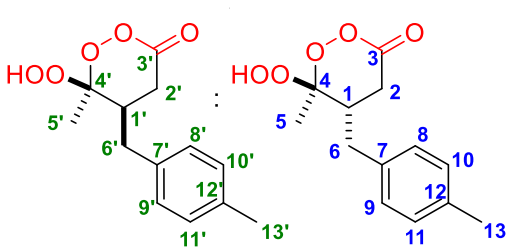

{<sup>1</sup>H-<sup>13</sup>C} HMBC

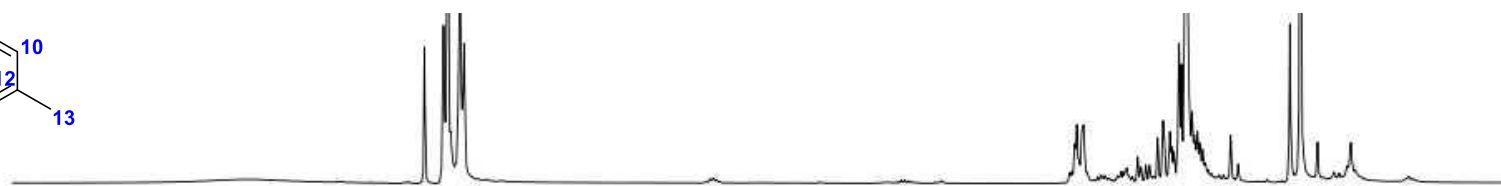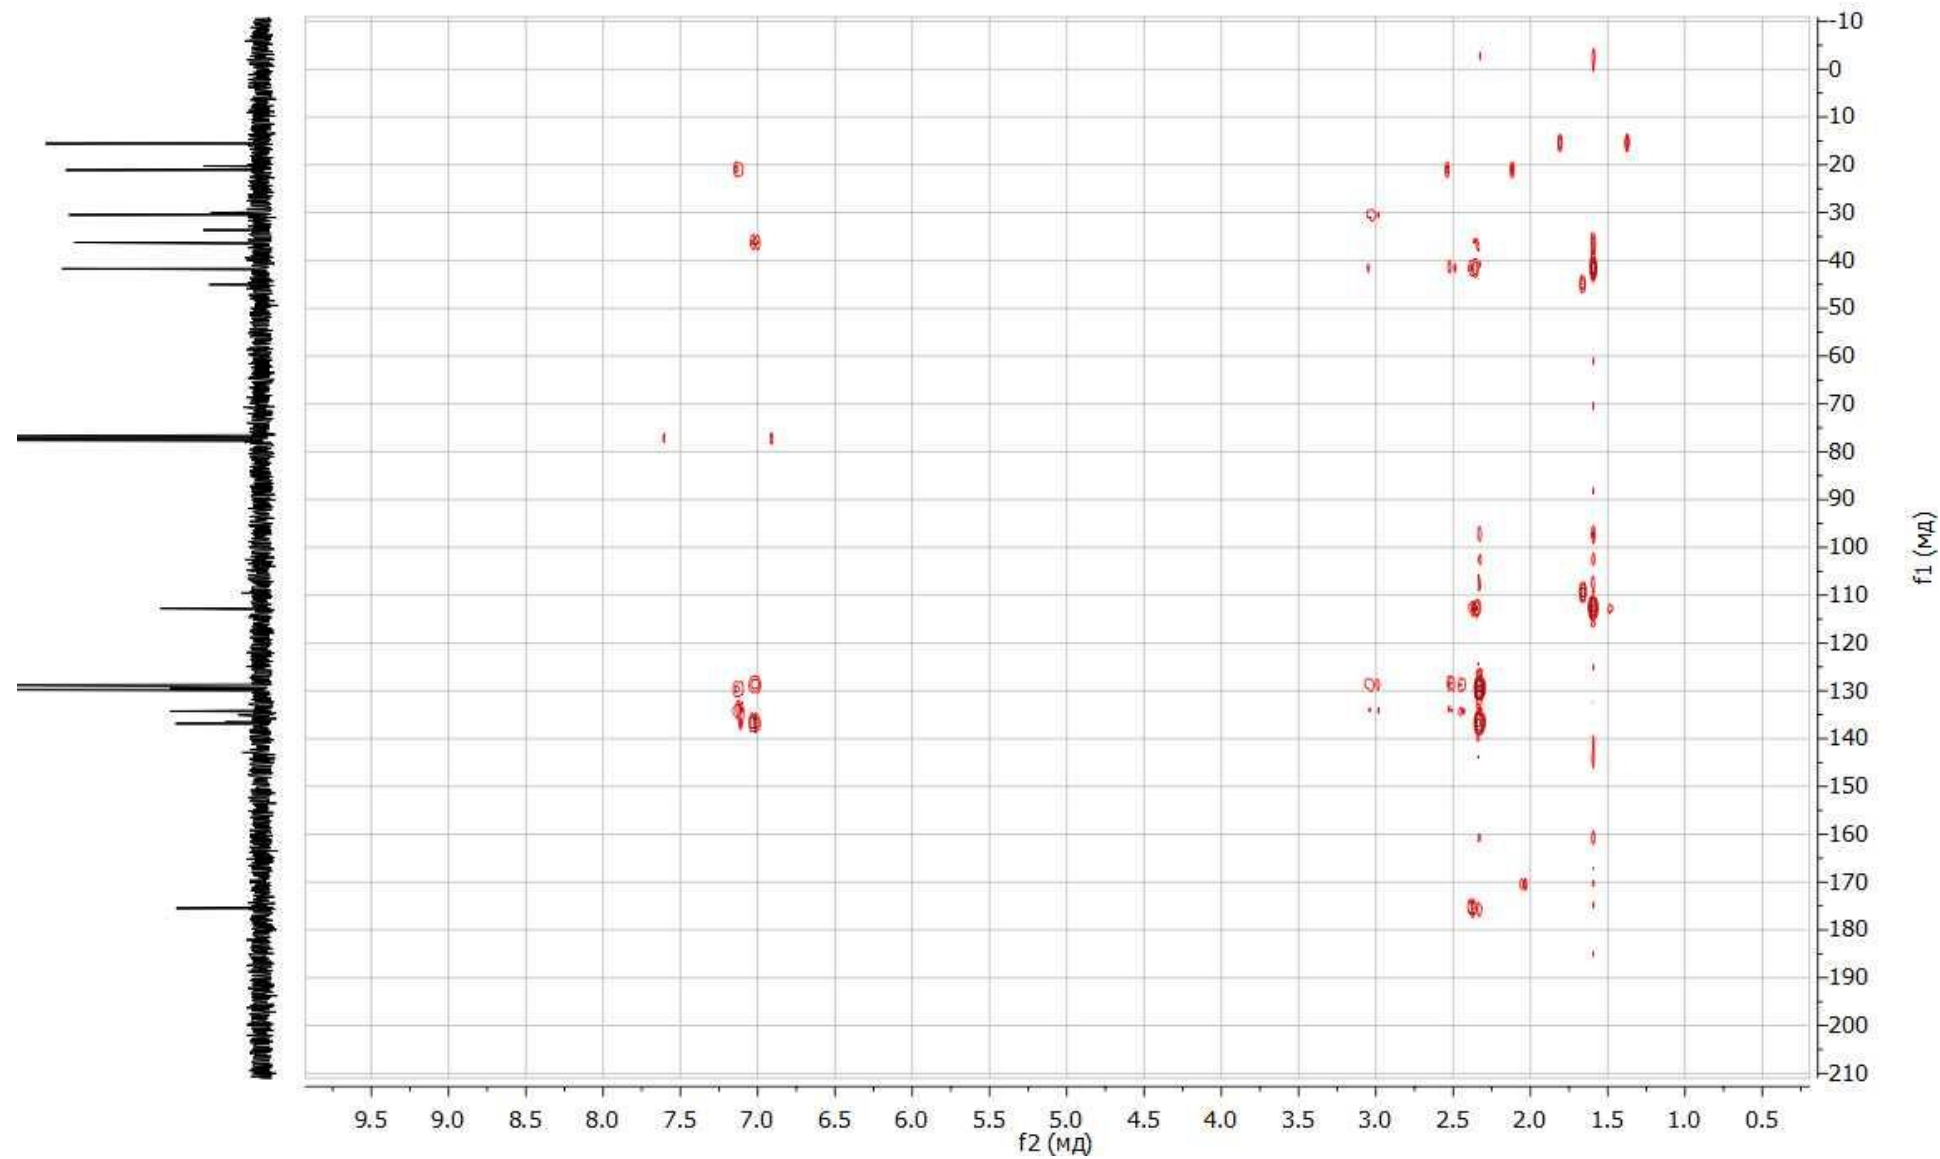

6-Hydroperoxy-6-methyl-5-(3-methylbenzyl)-1,2-dioxan-3-one, 2g

<sup>1</sup>H NMR

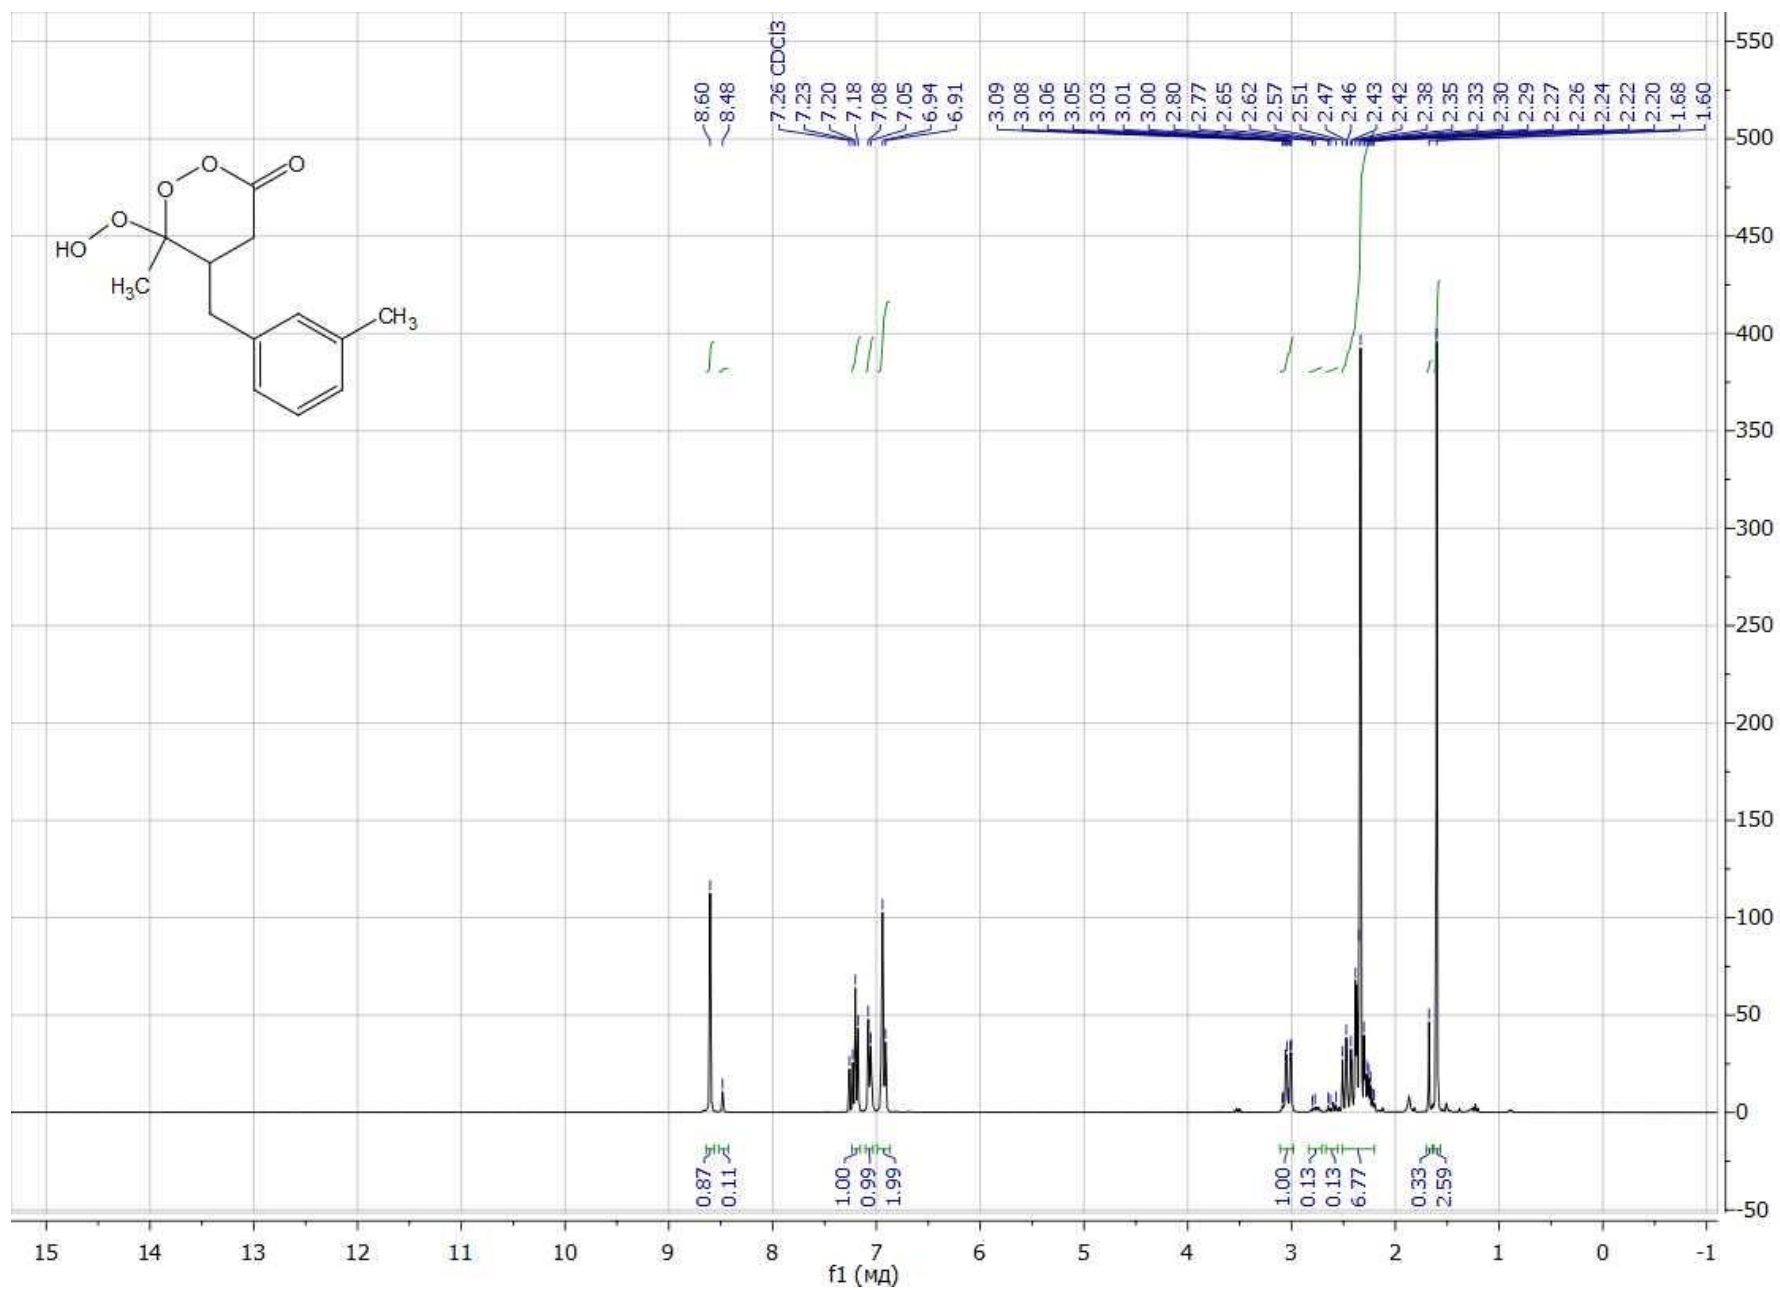

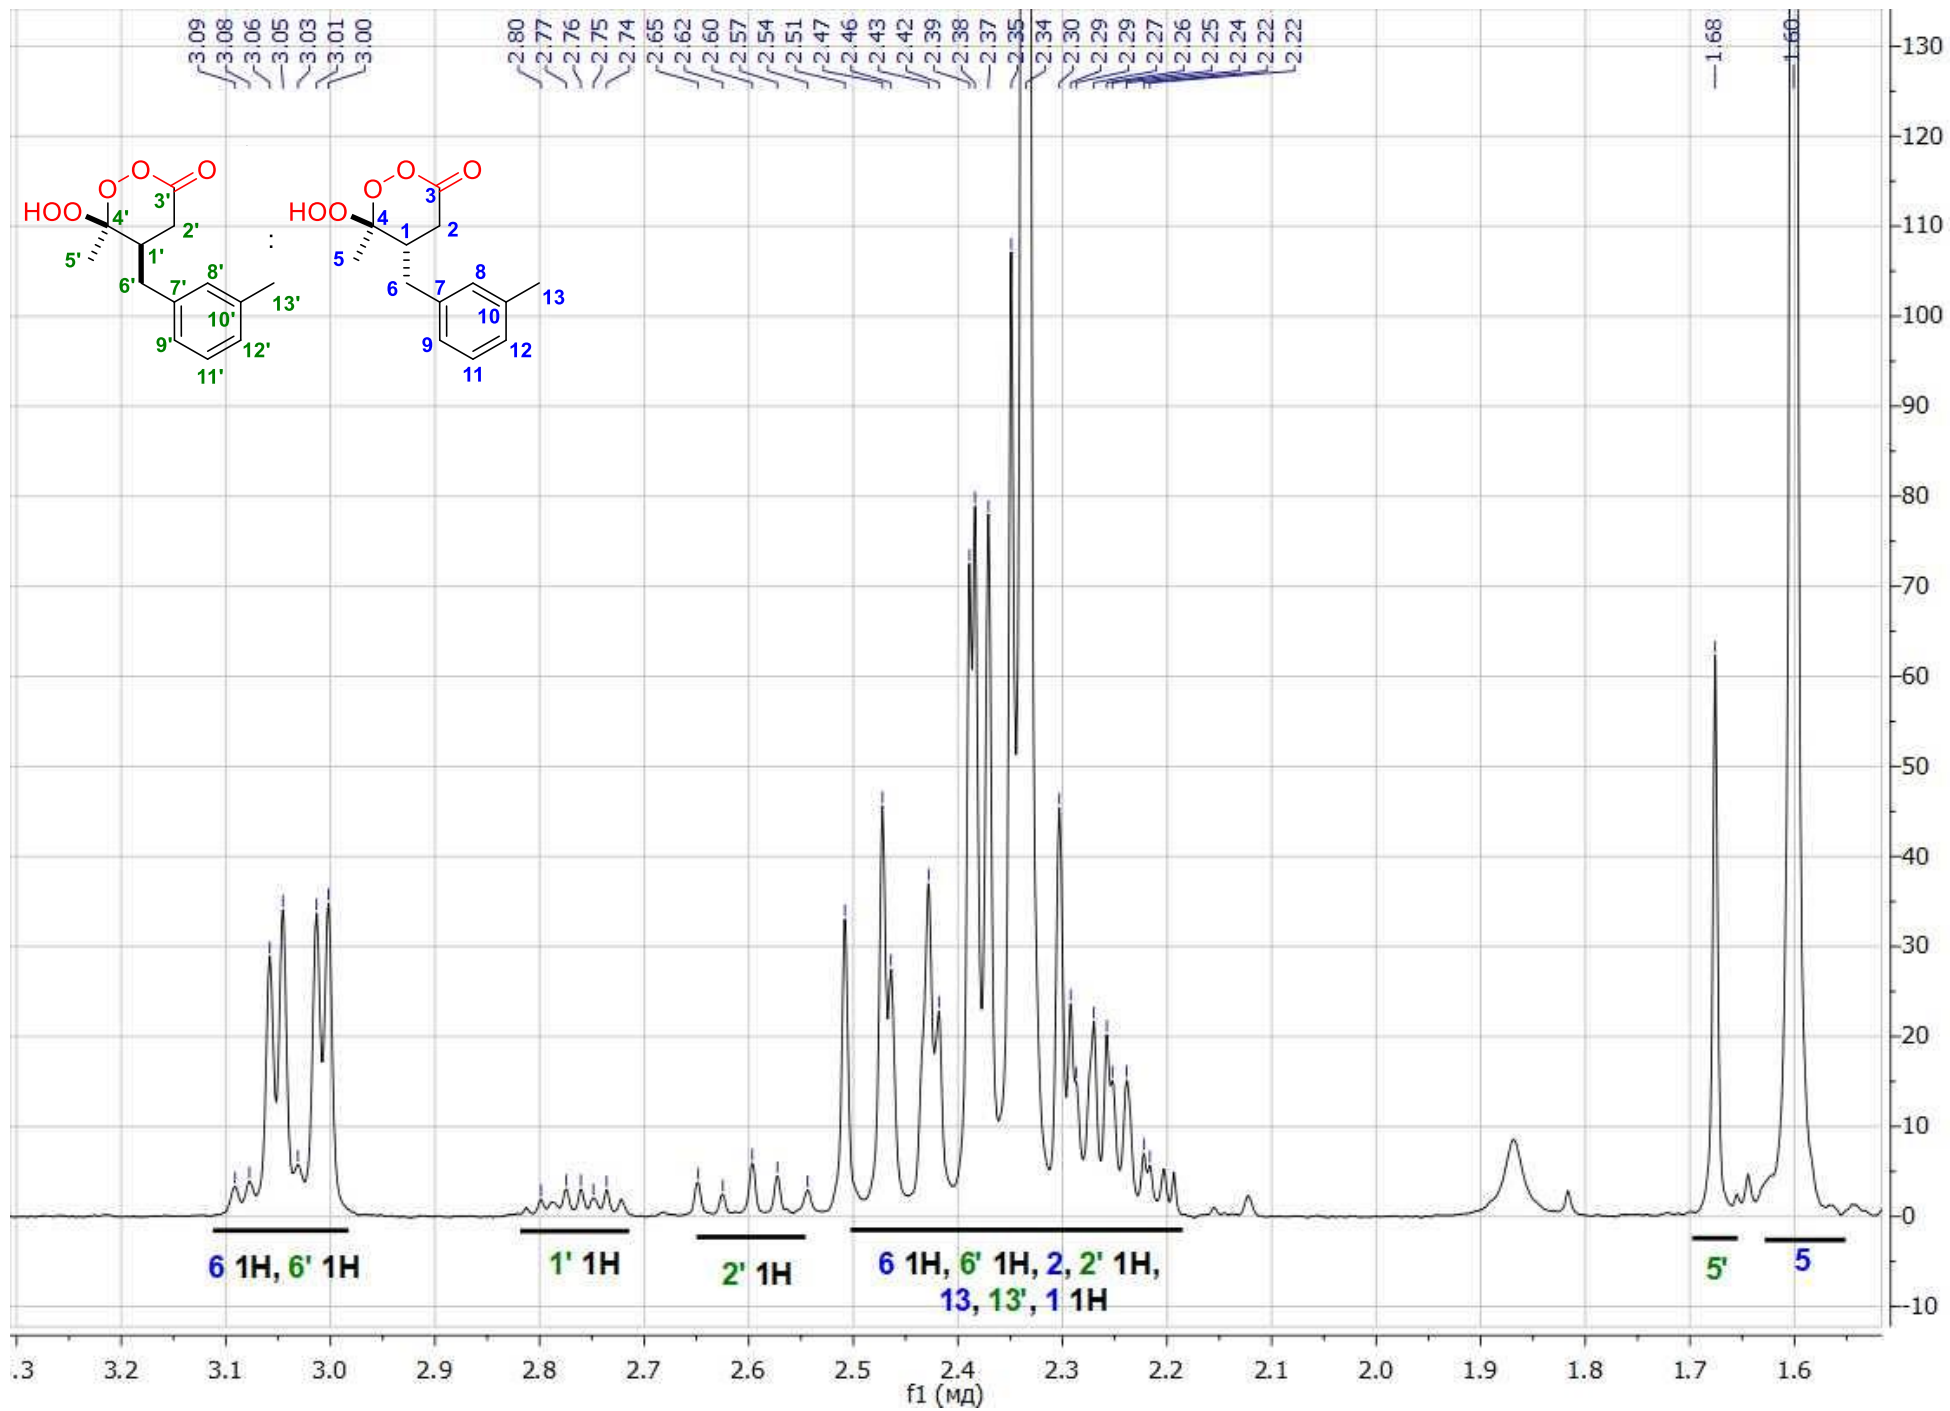

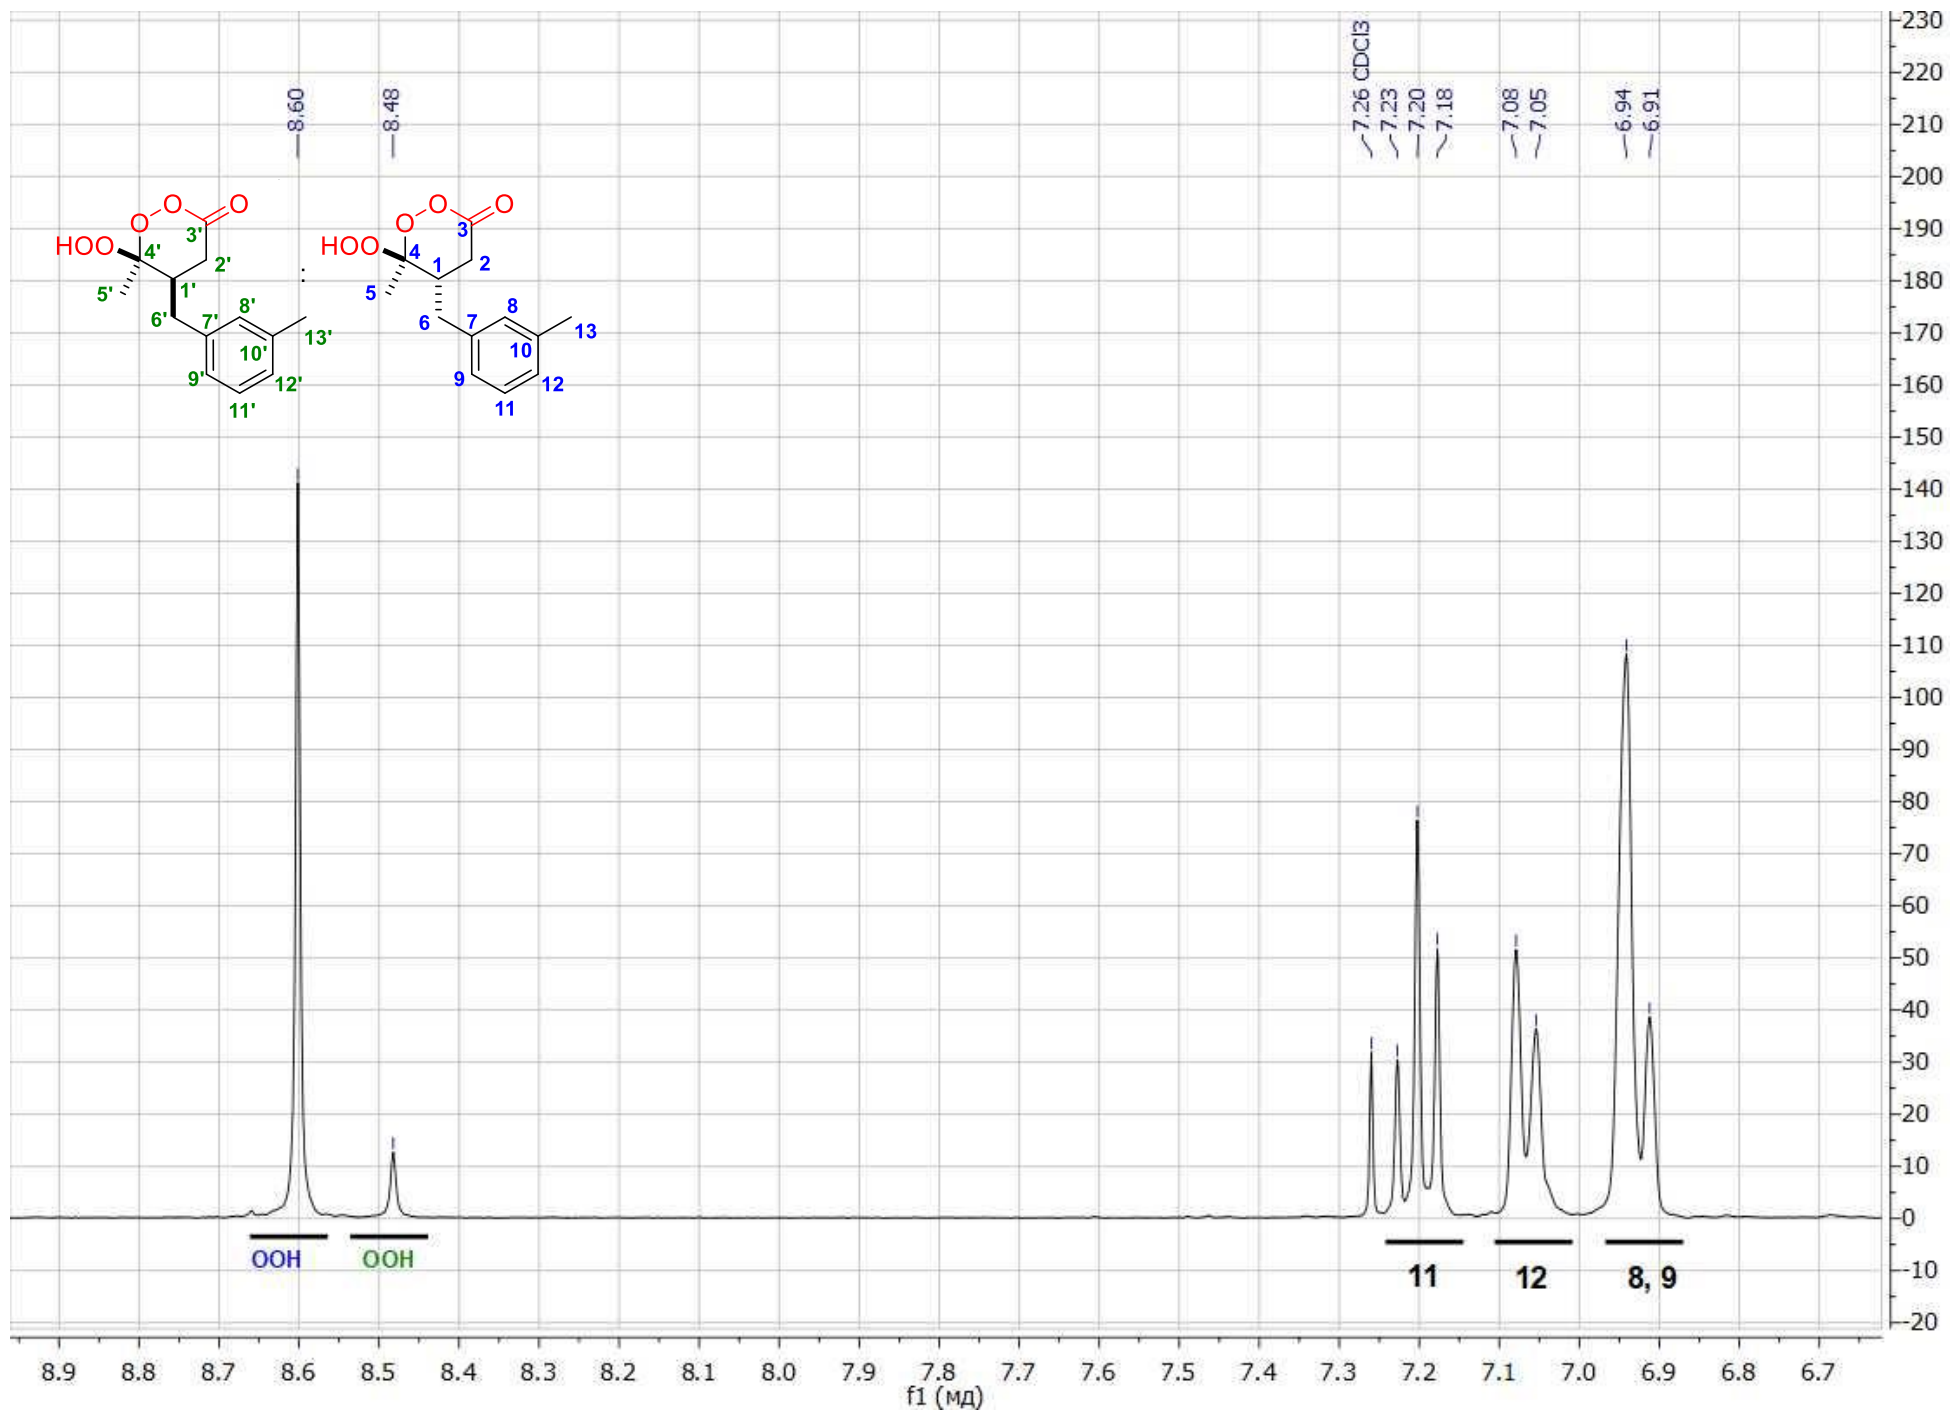

<sup>13</sup>C NMR

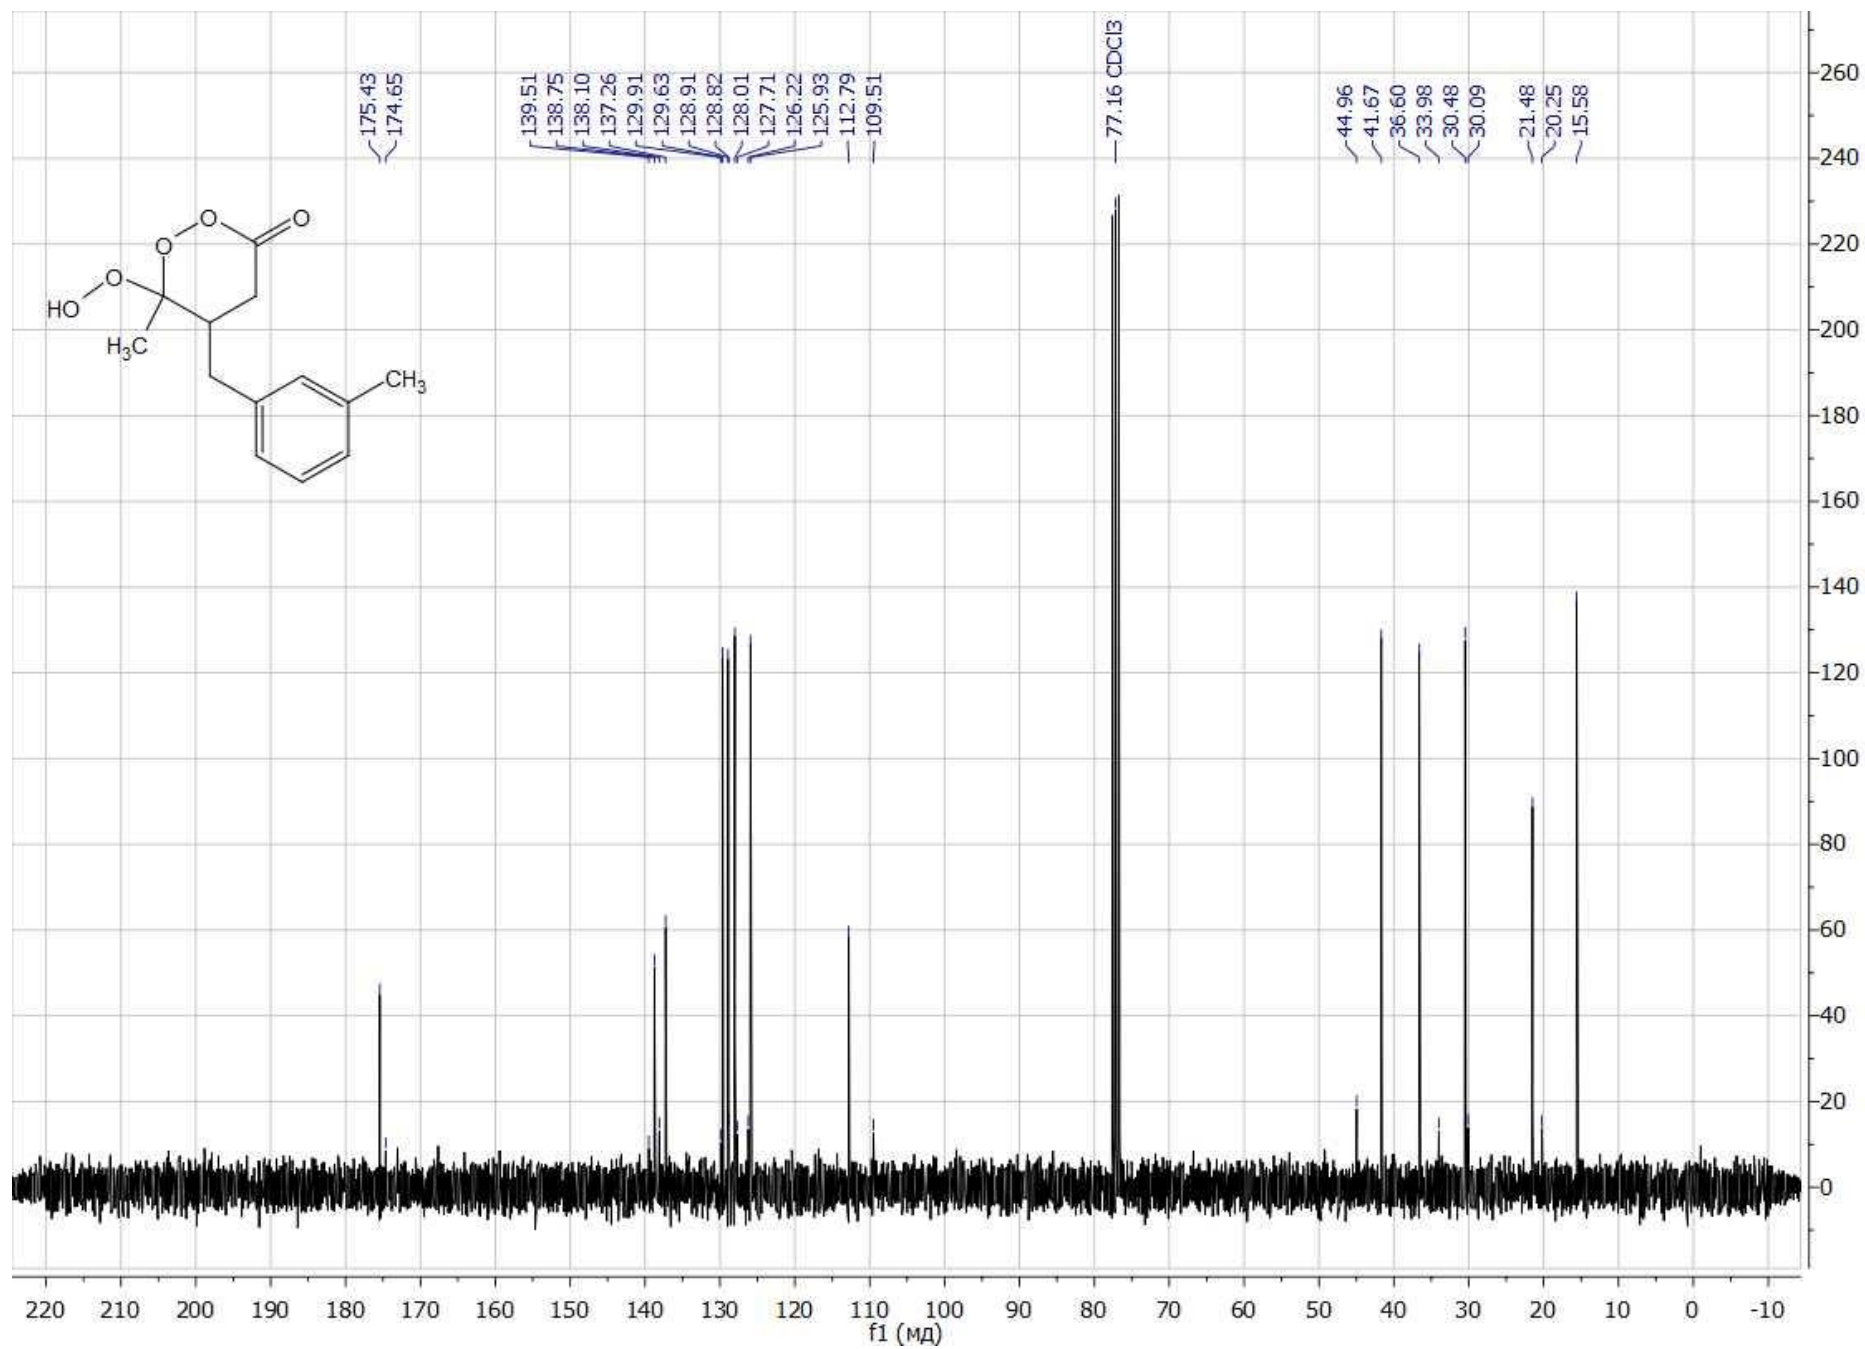

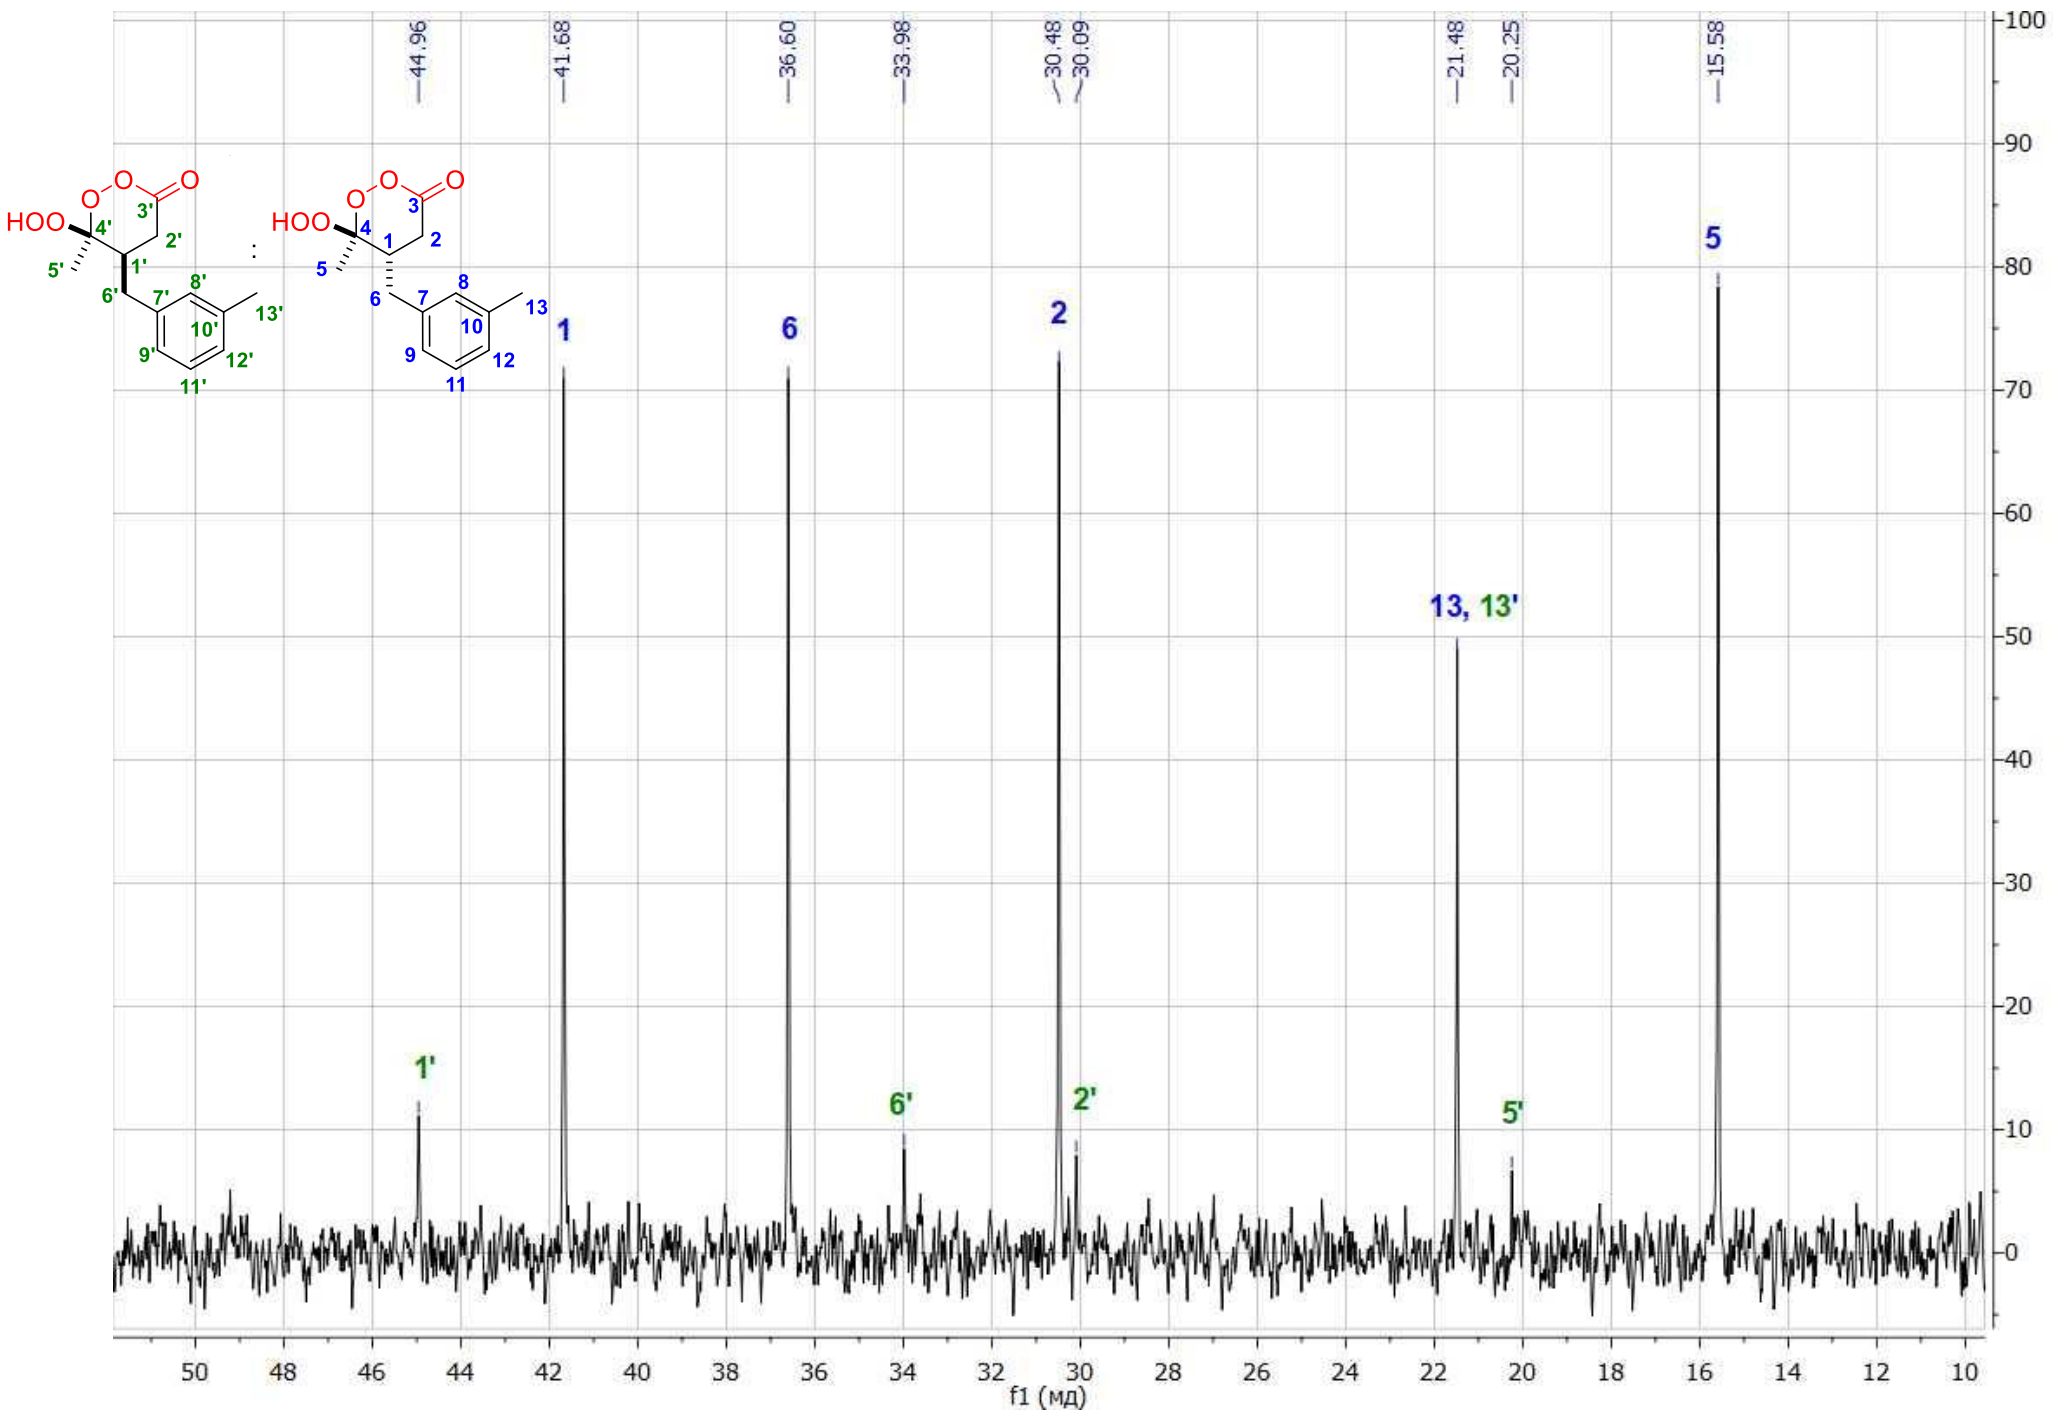

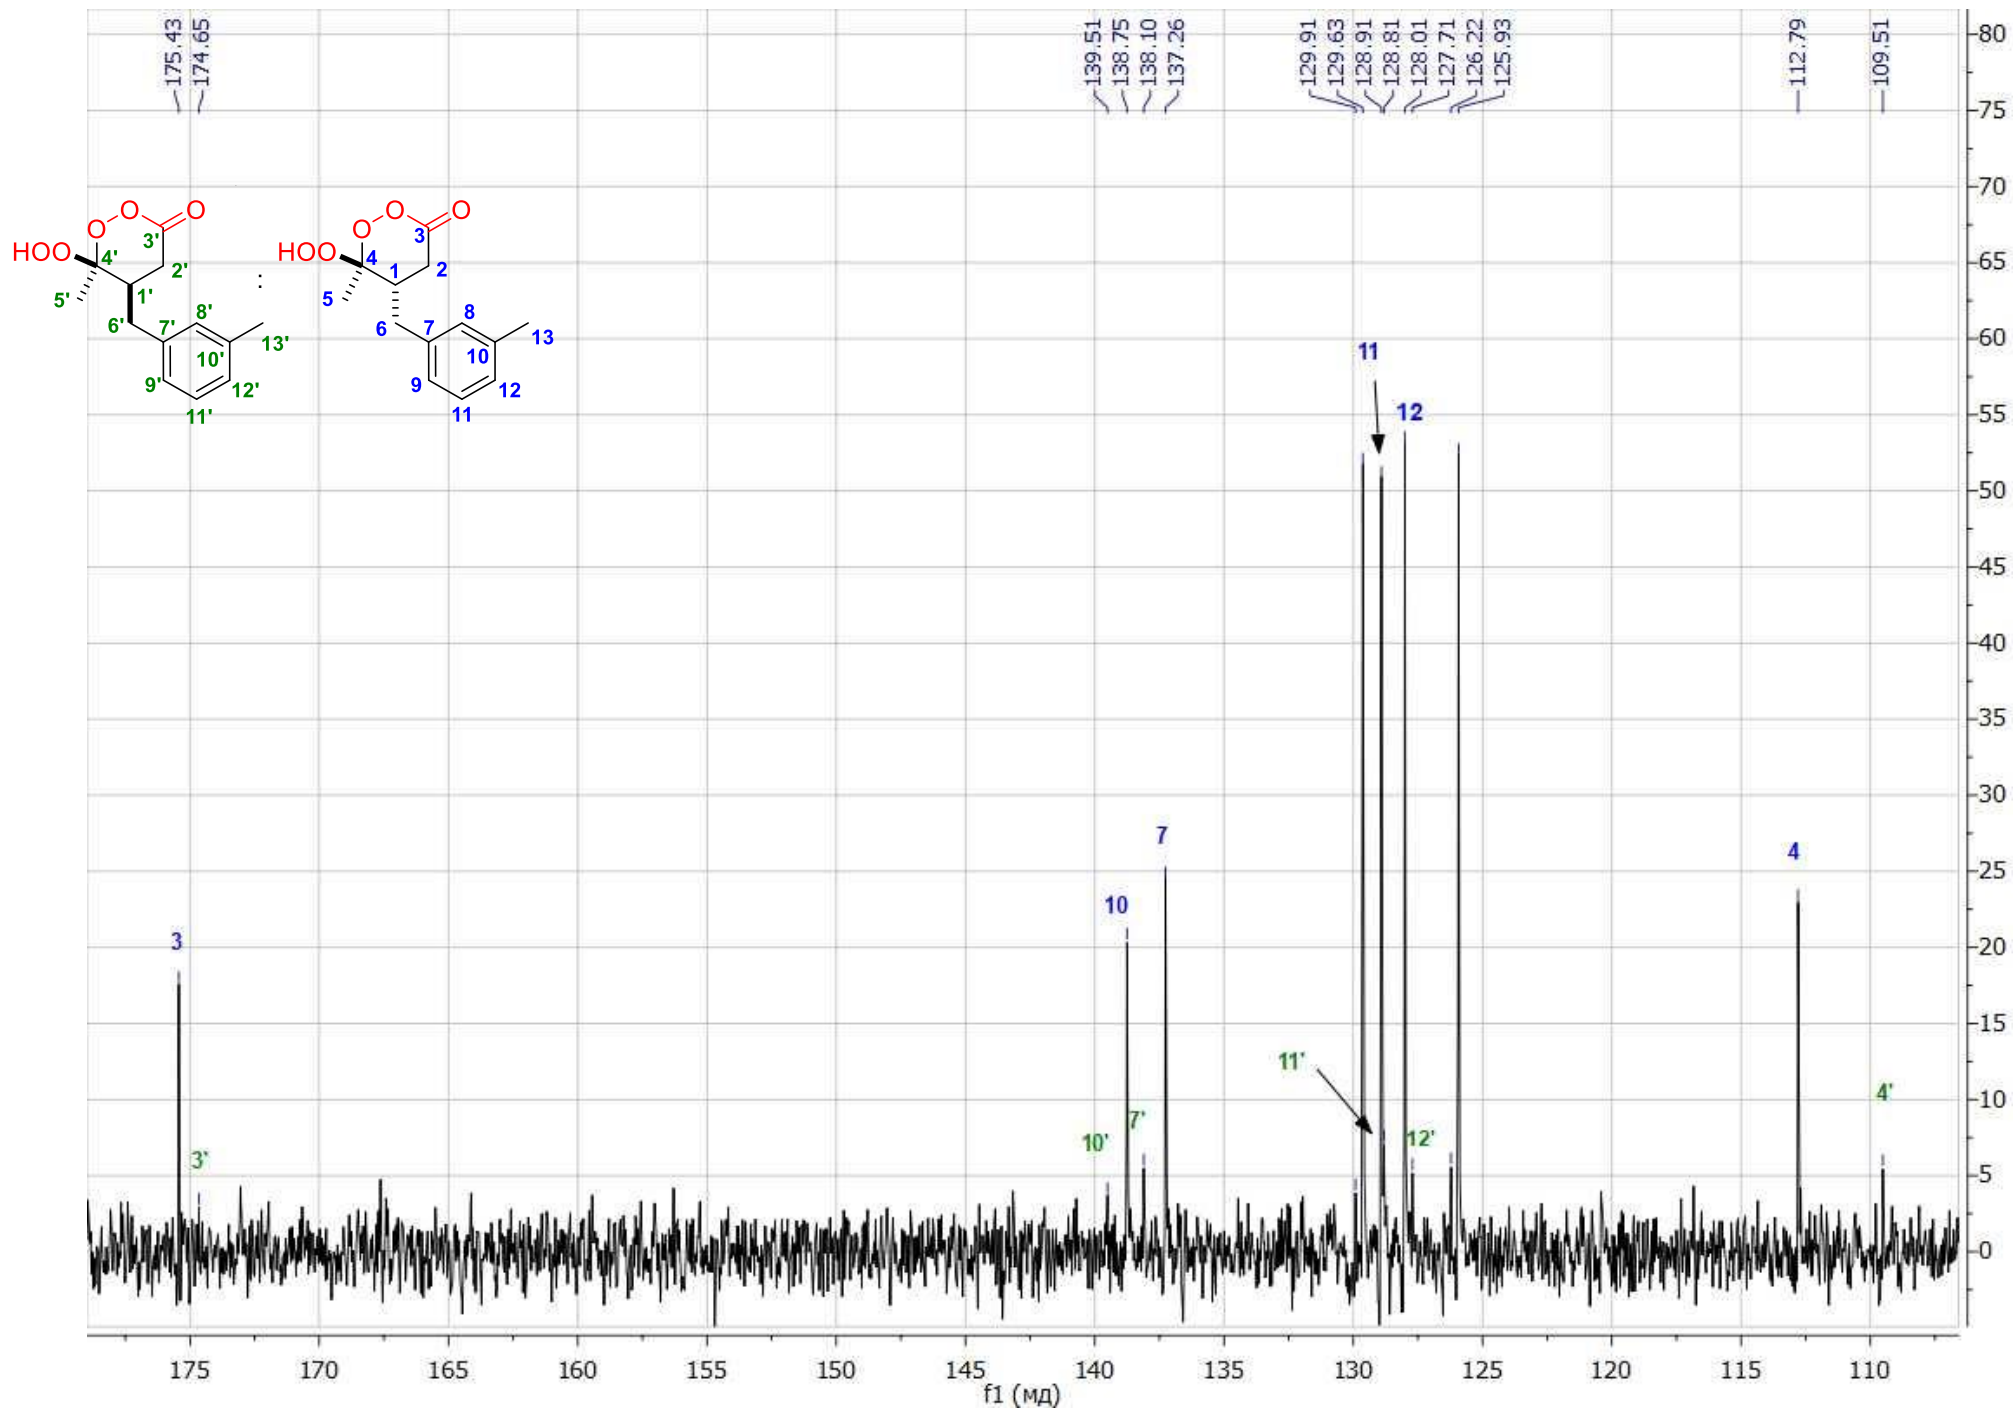



<sup>13</sup>C\_deptsp135

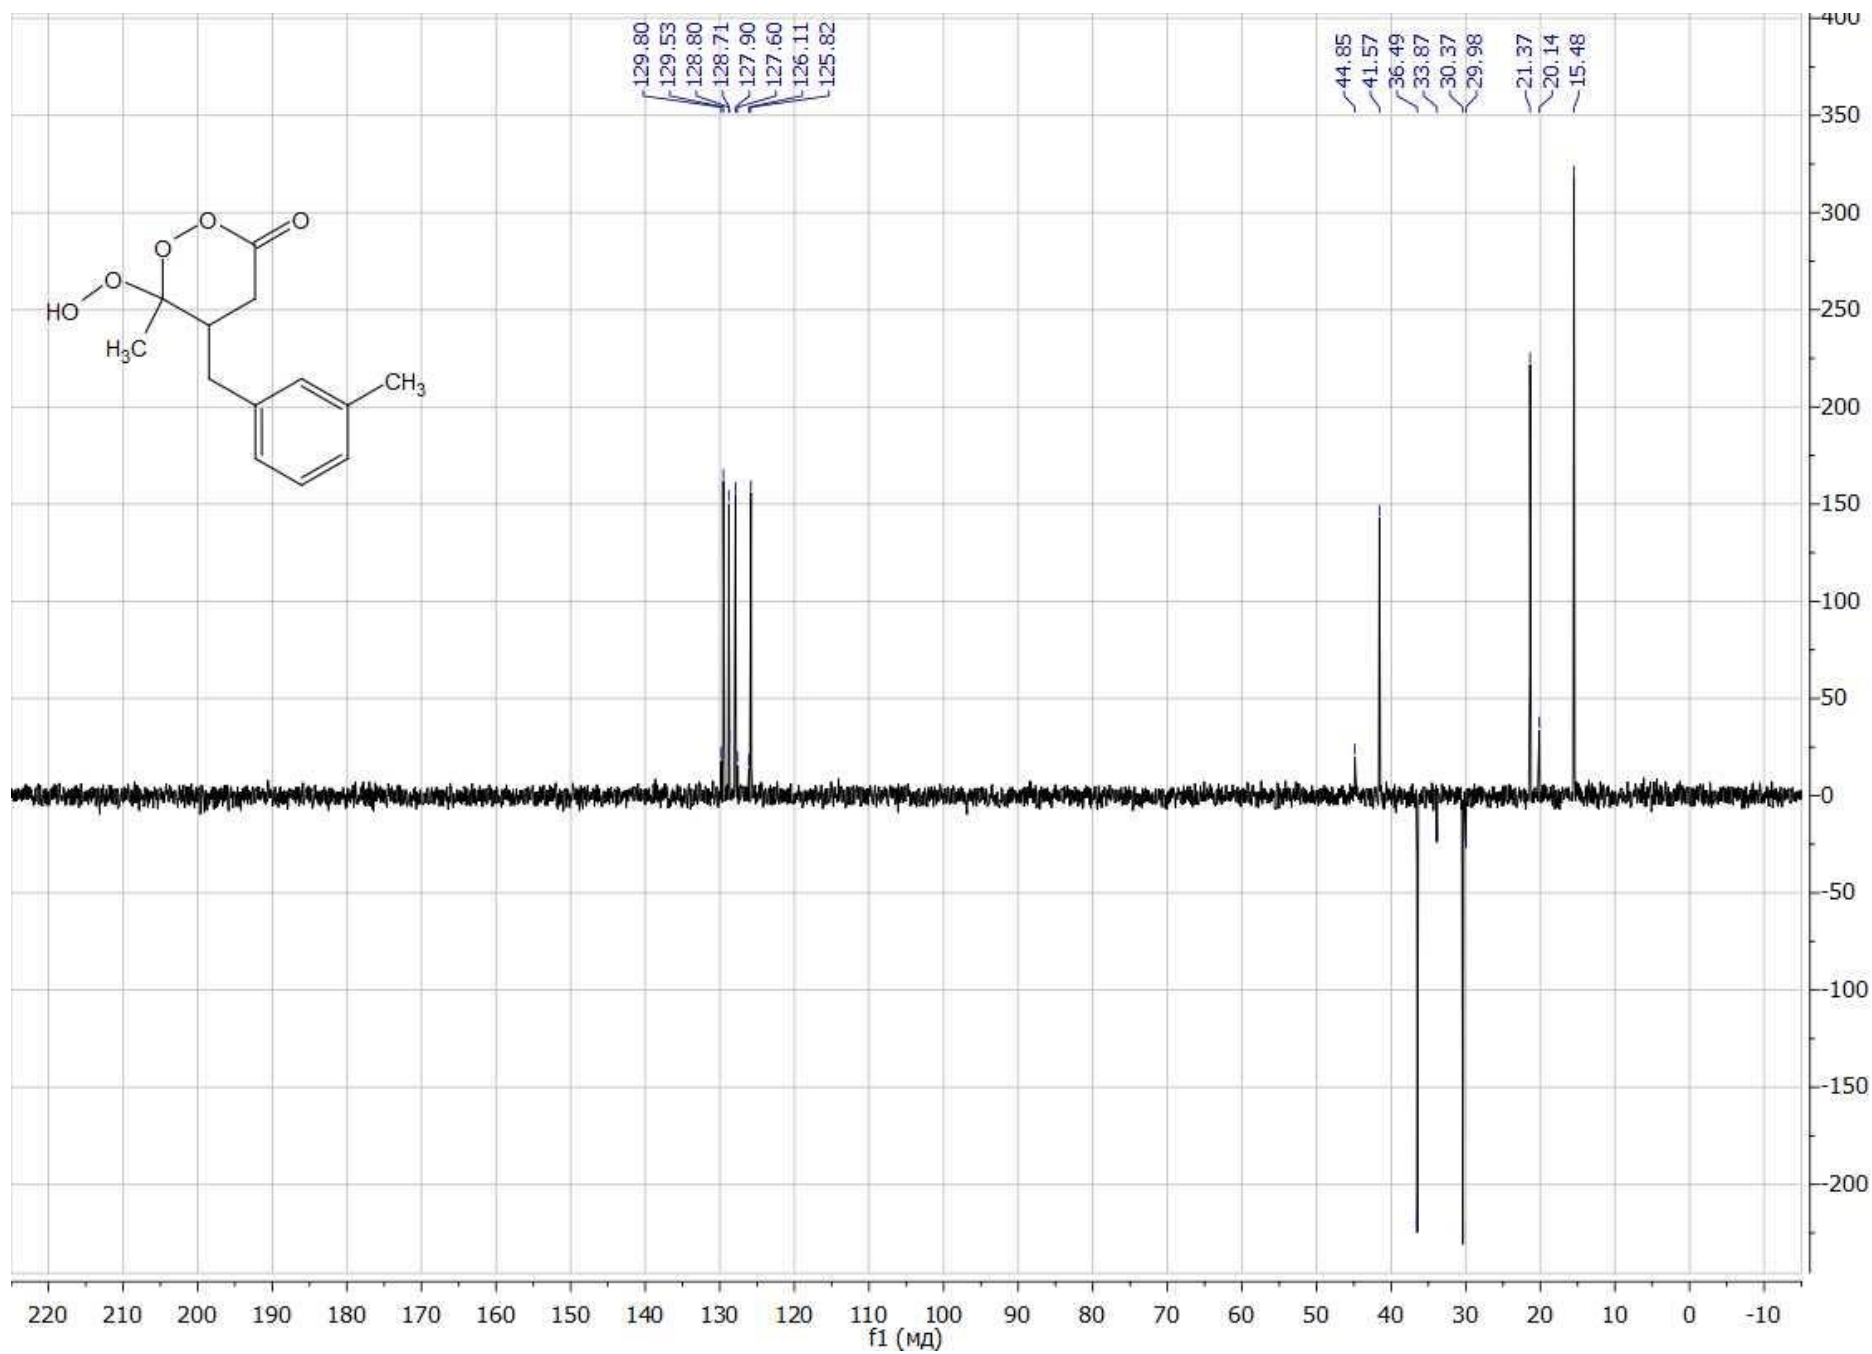

{<sup>1</sup>H-<sup>1</sup>H} COSY

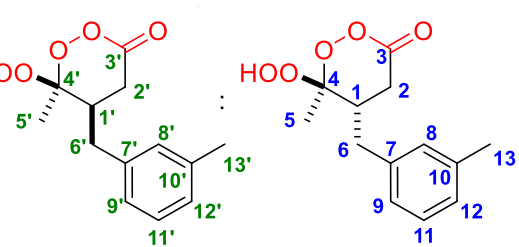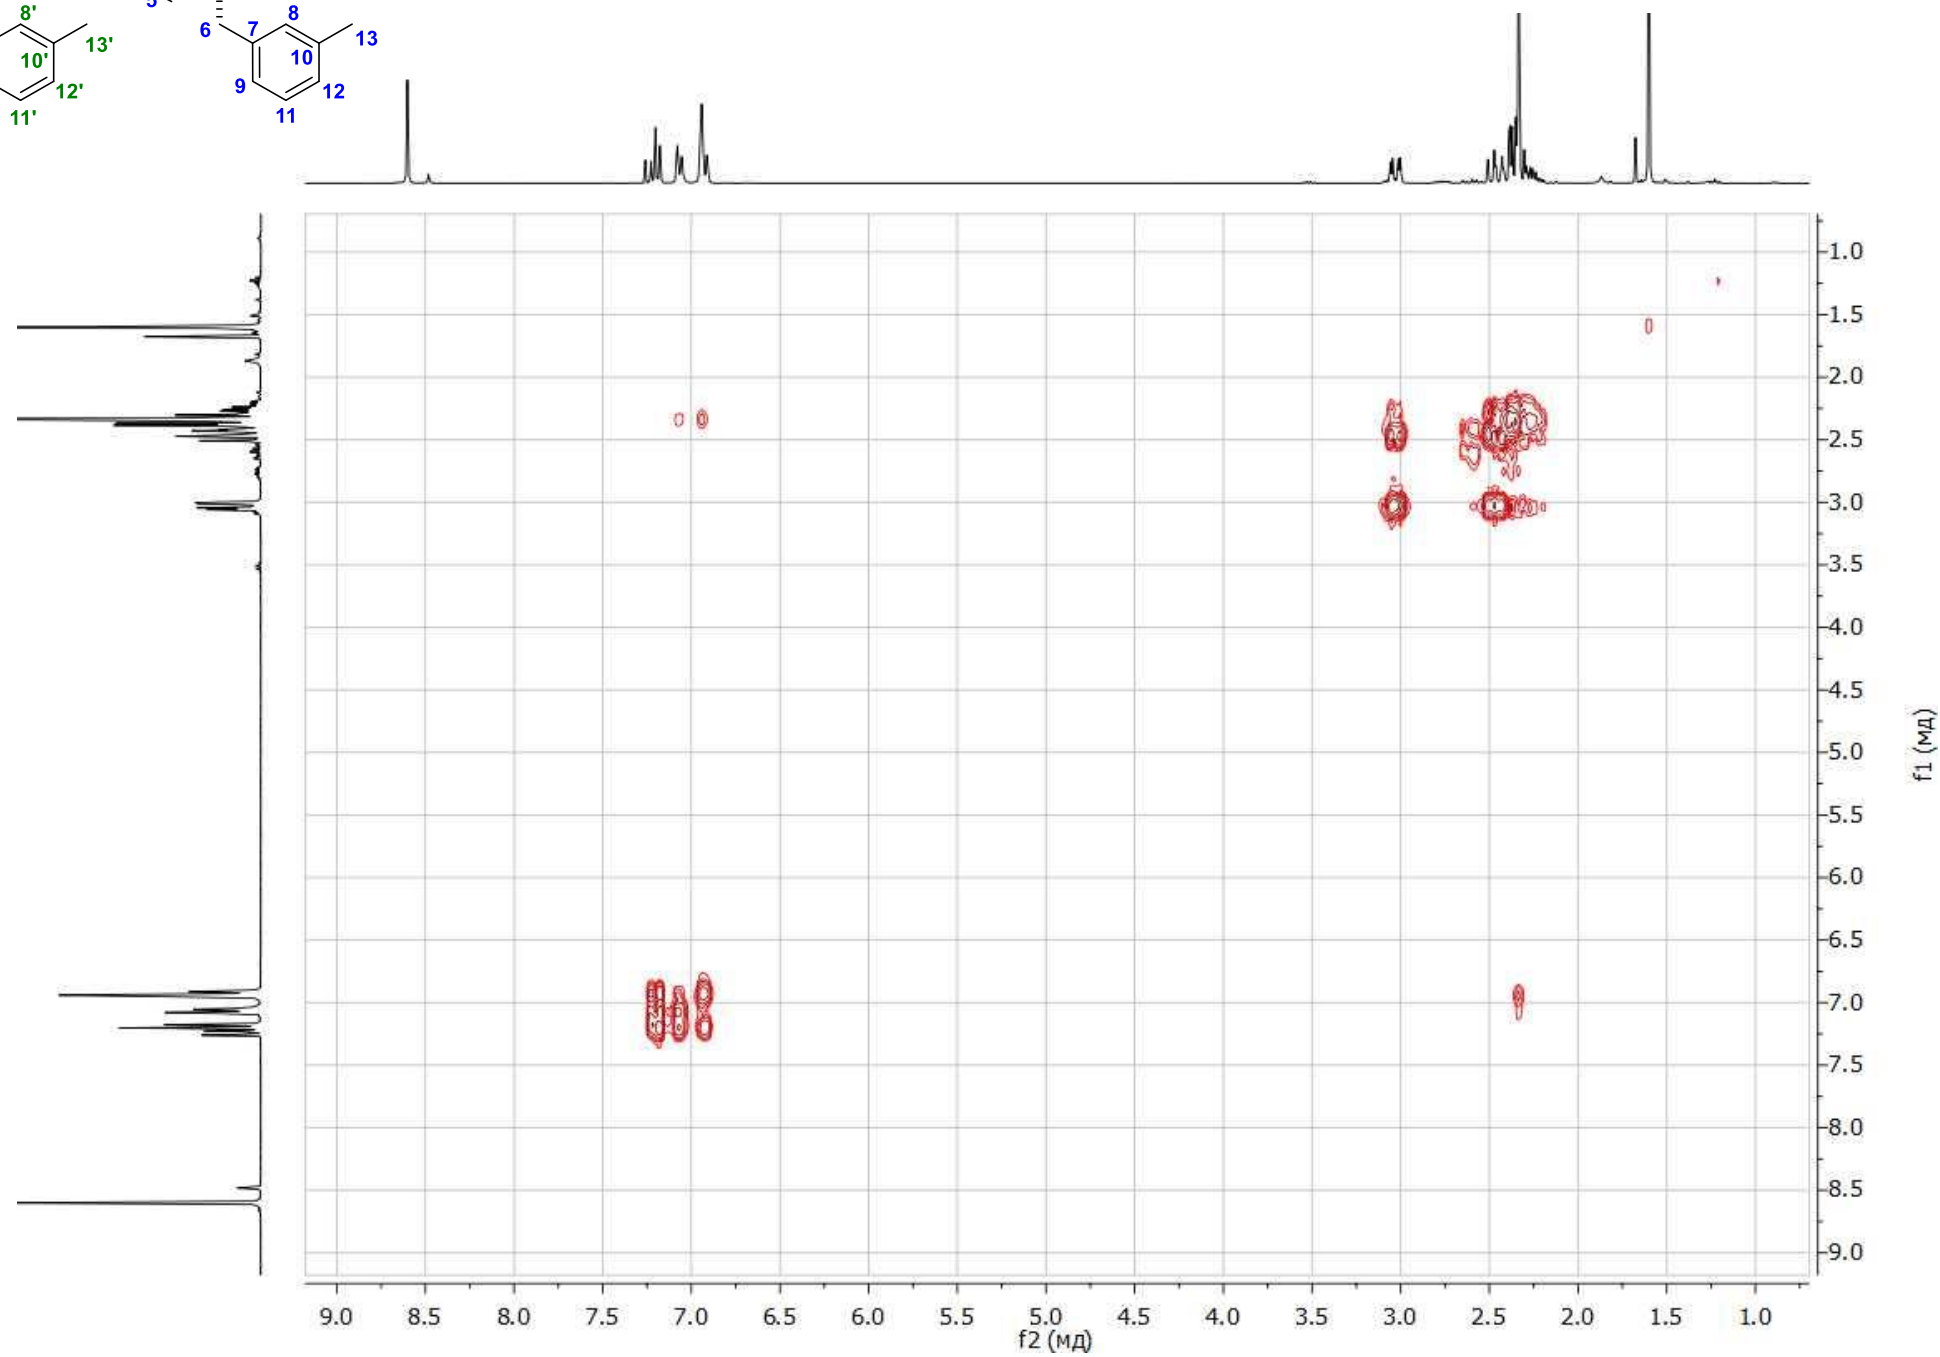

{<sup>1</sup>H-<sup>1</sup>H} NOESY

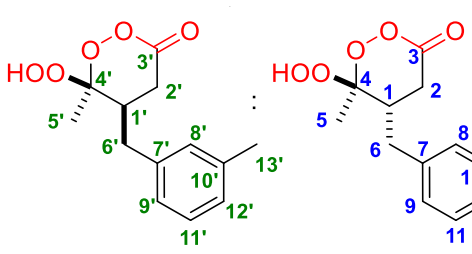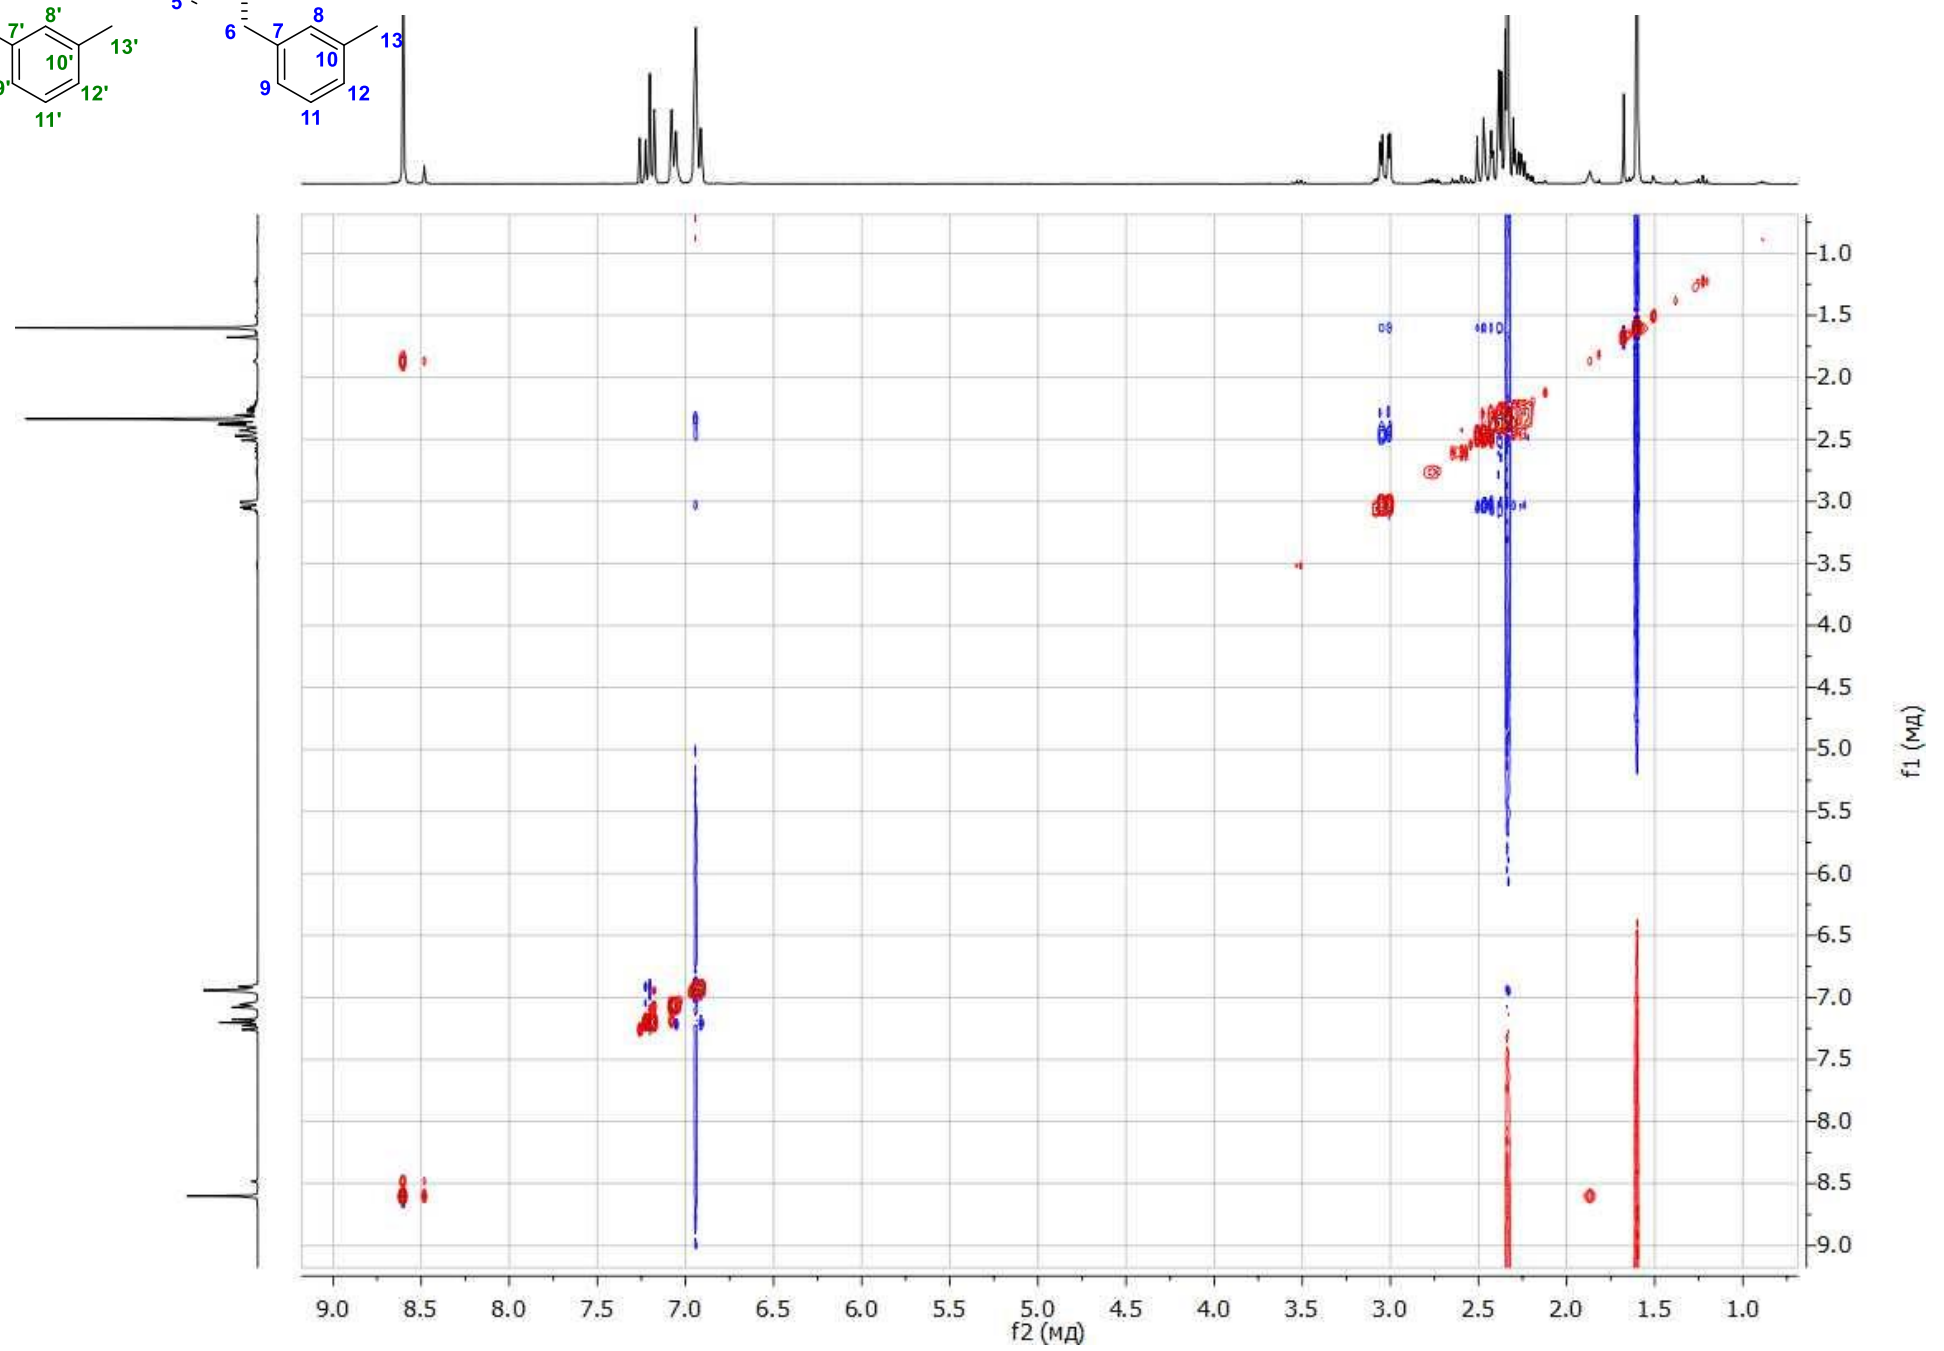

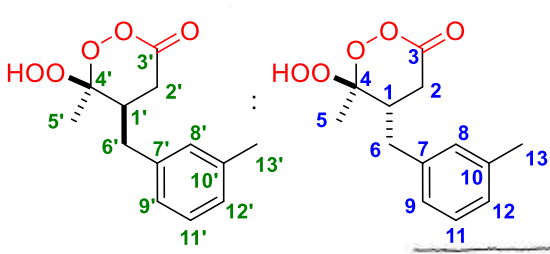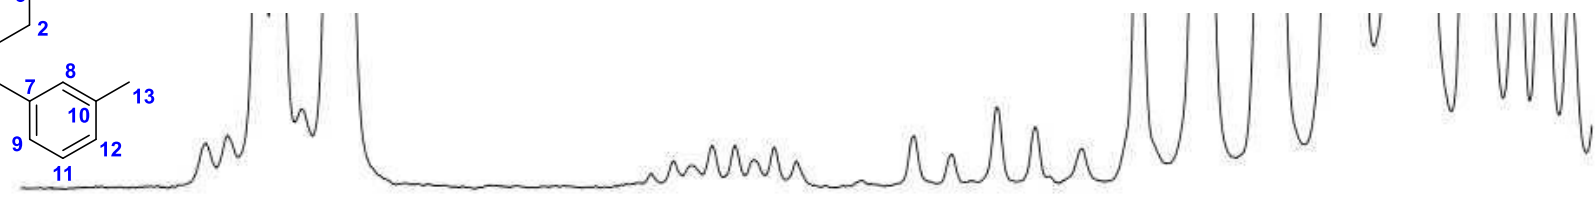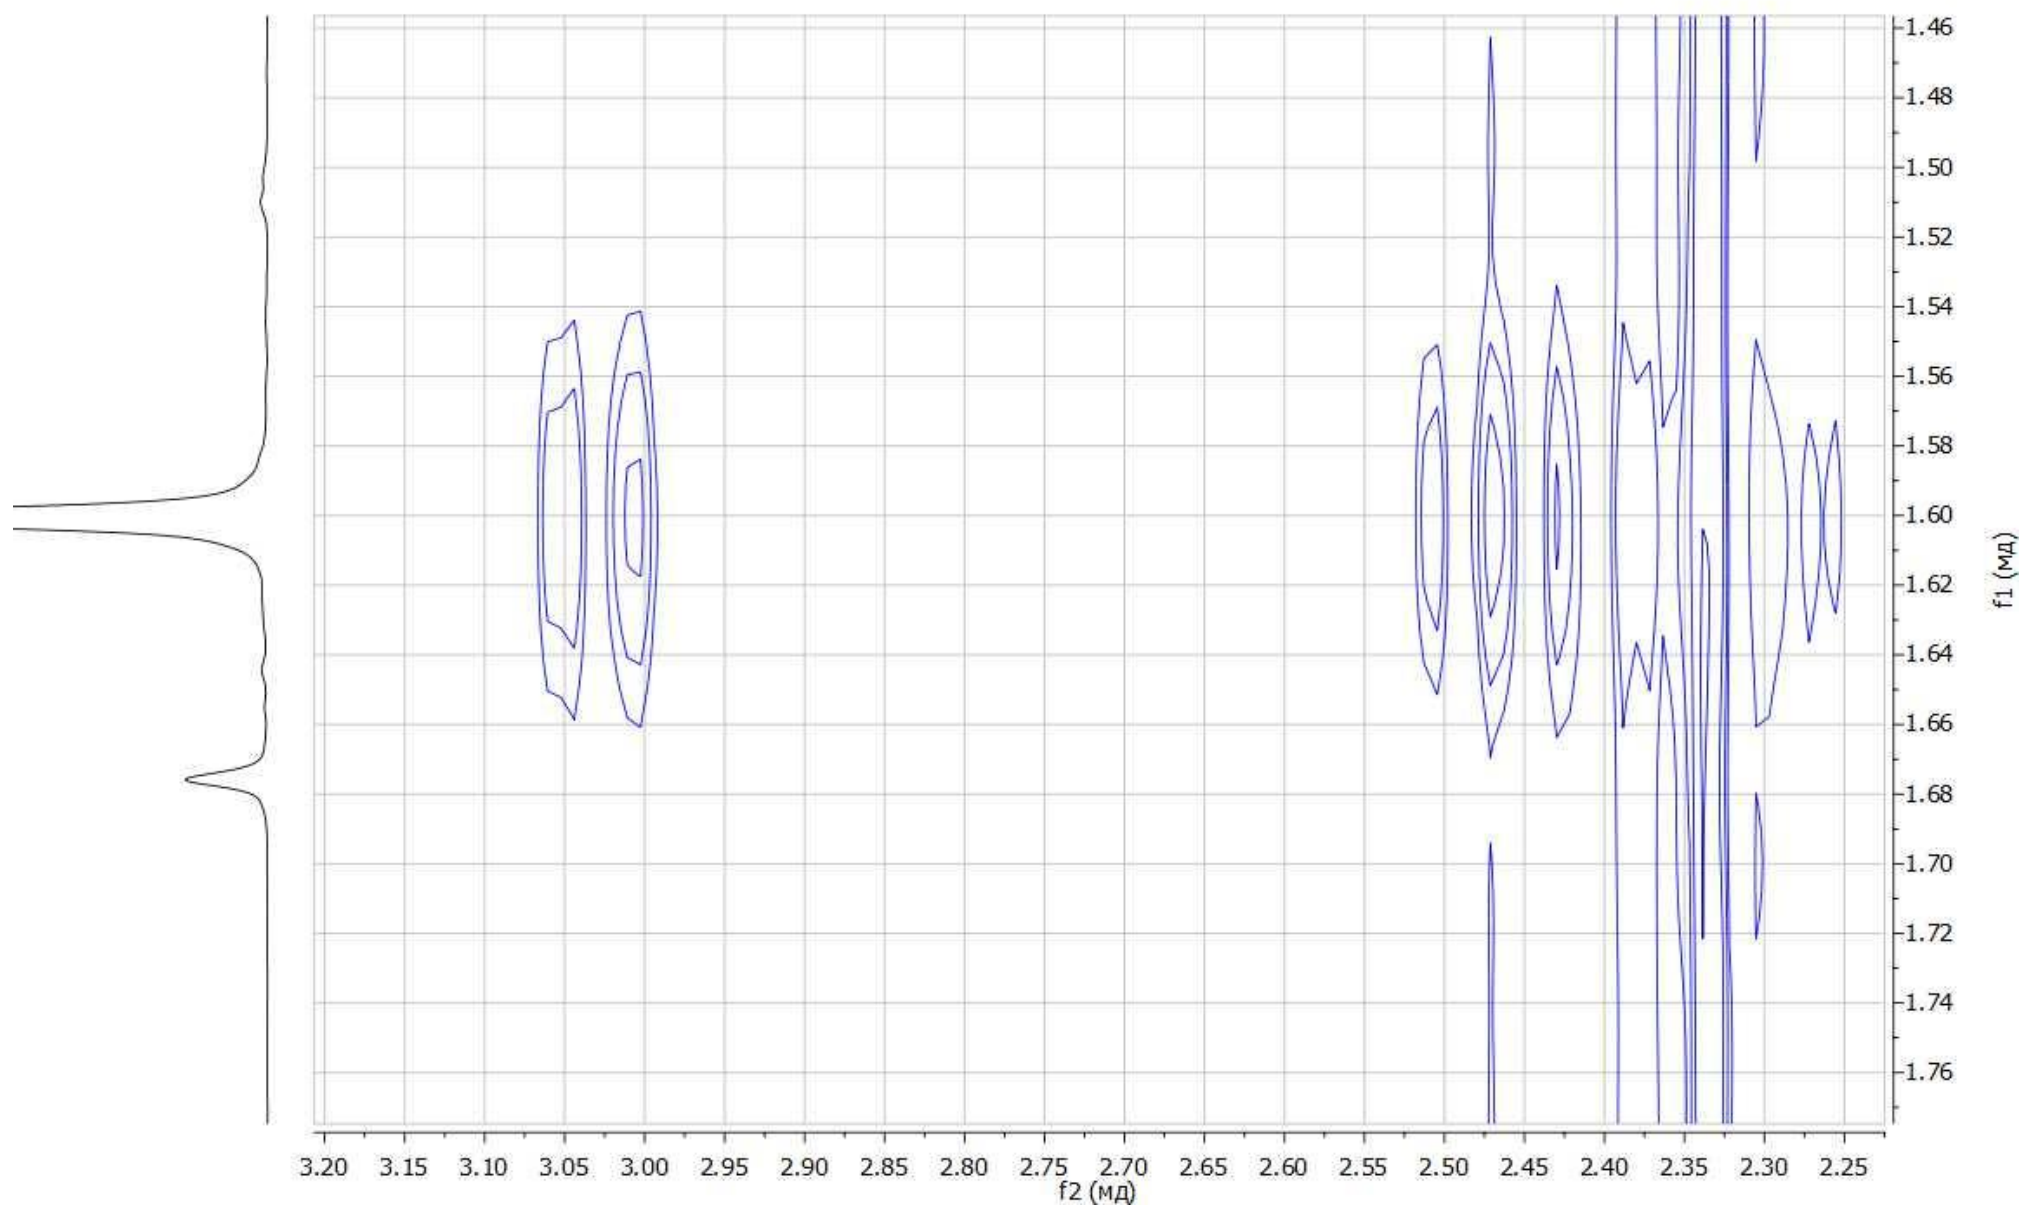

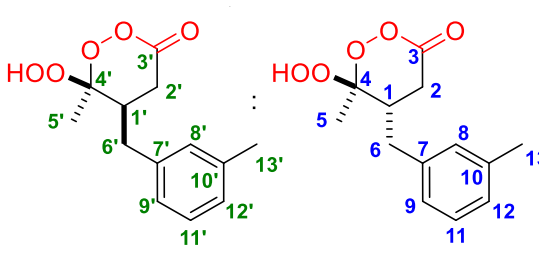

{<sup>1</sup>H-<sup>13</sup>C} HSQC

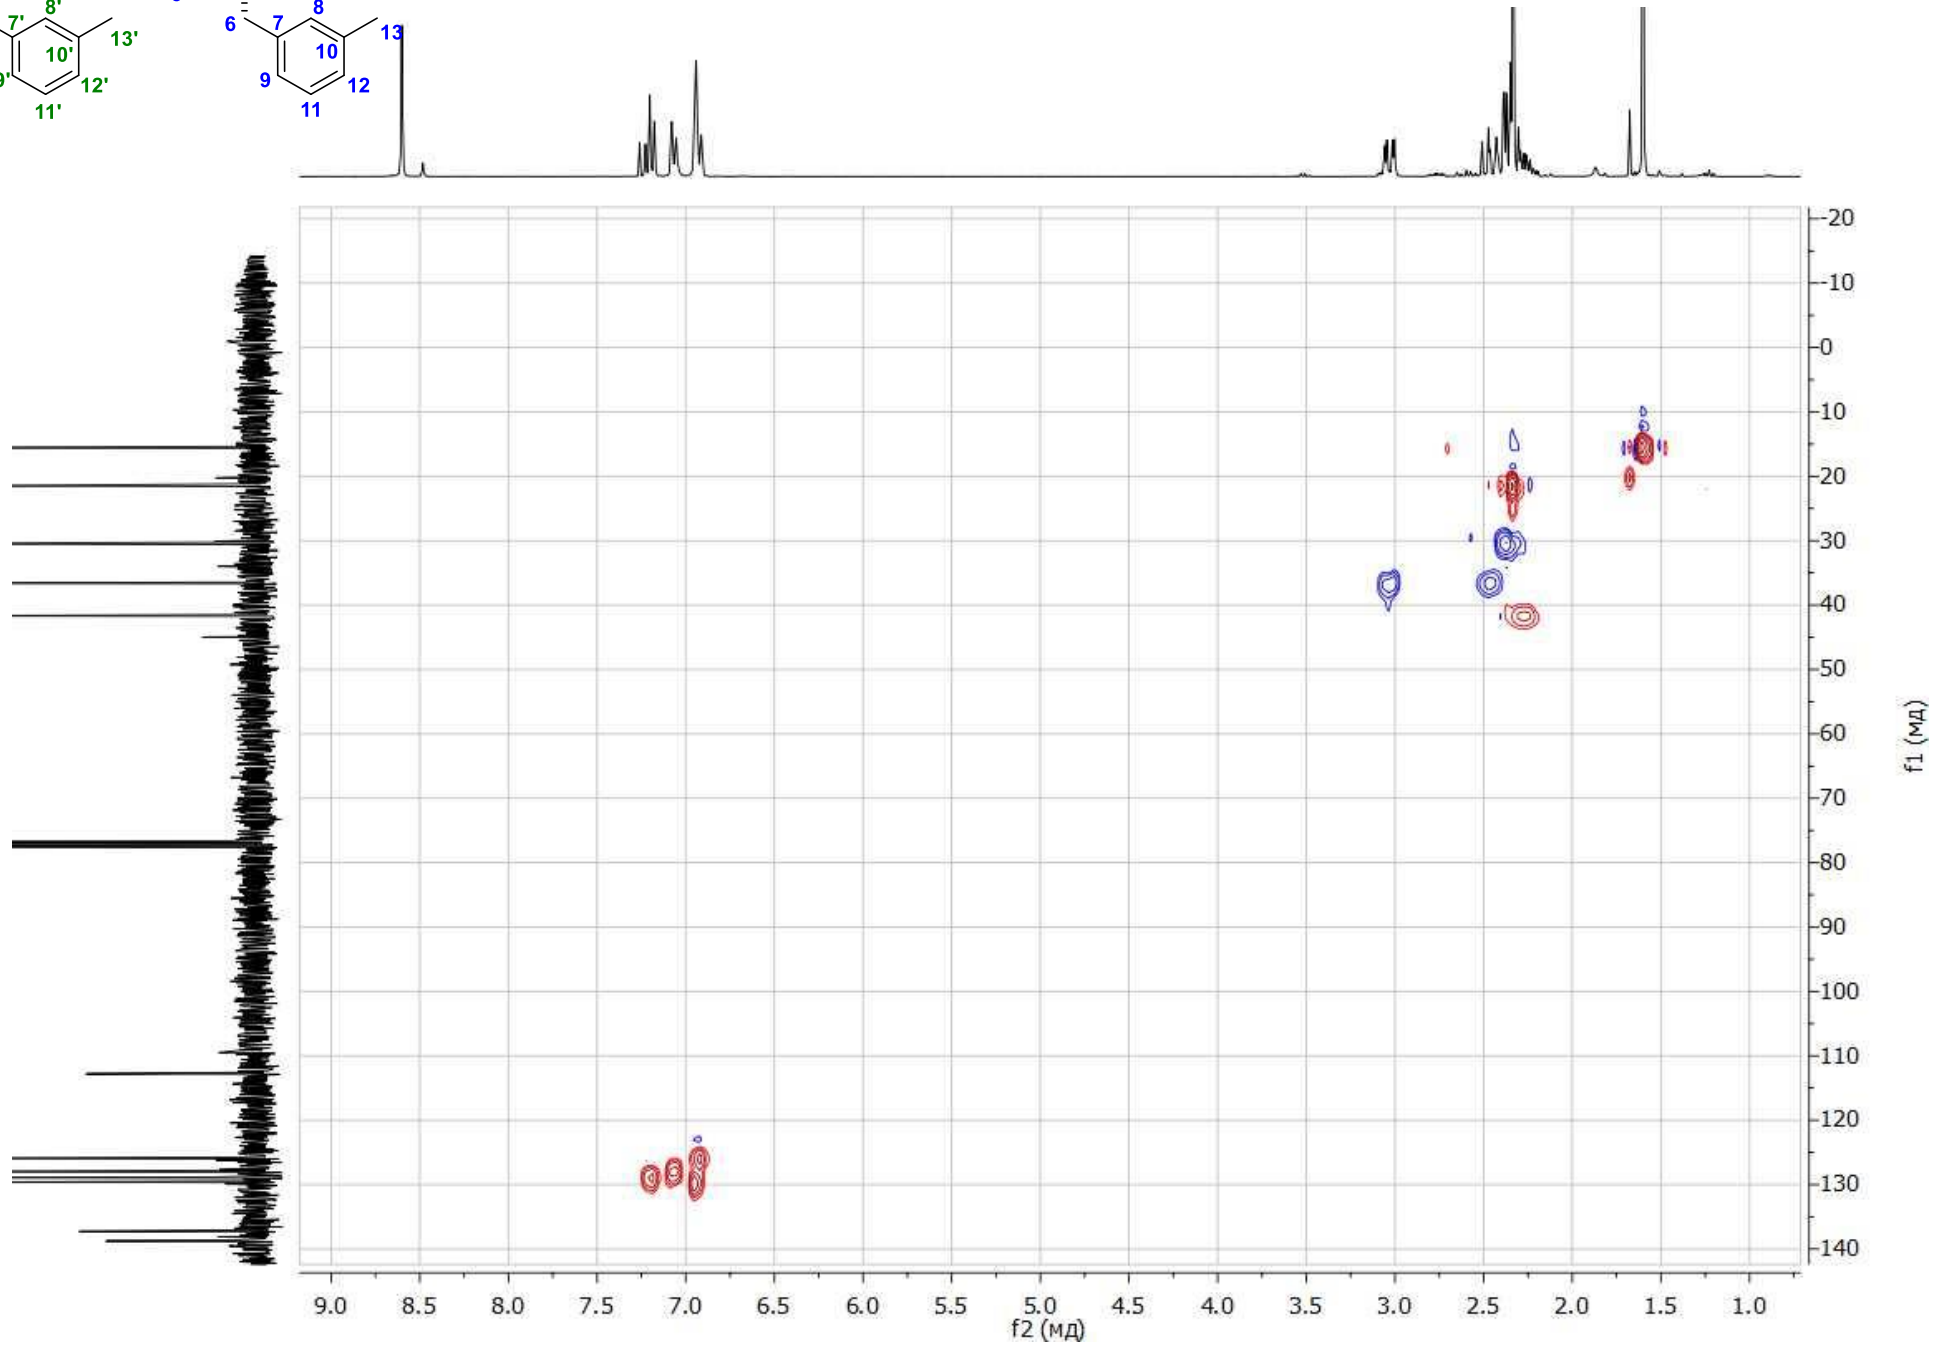

{<sup>1</sup>H-<sup>13</sup>C} HMBC

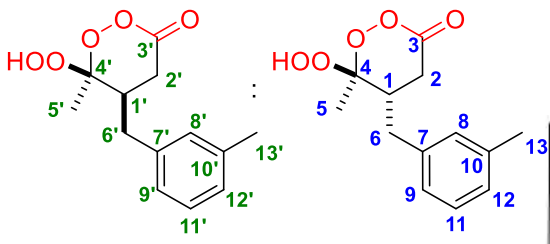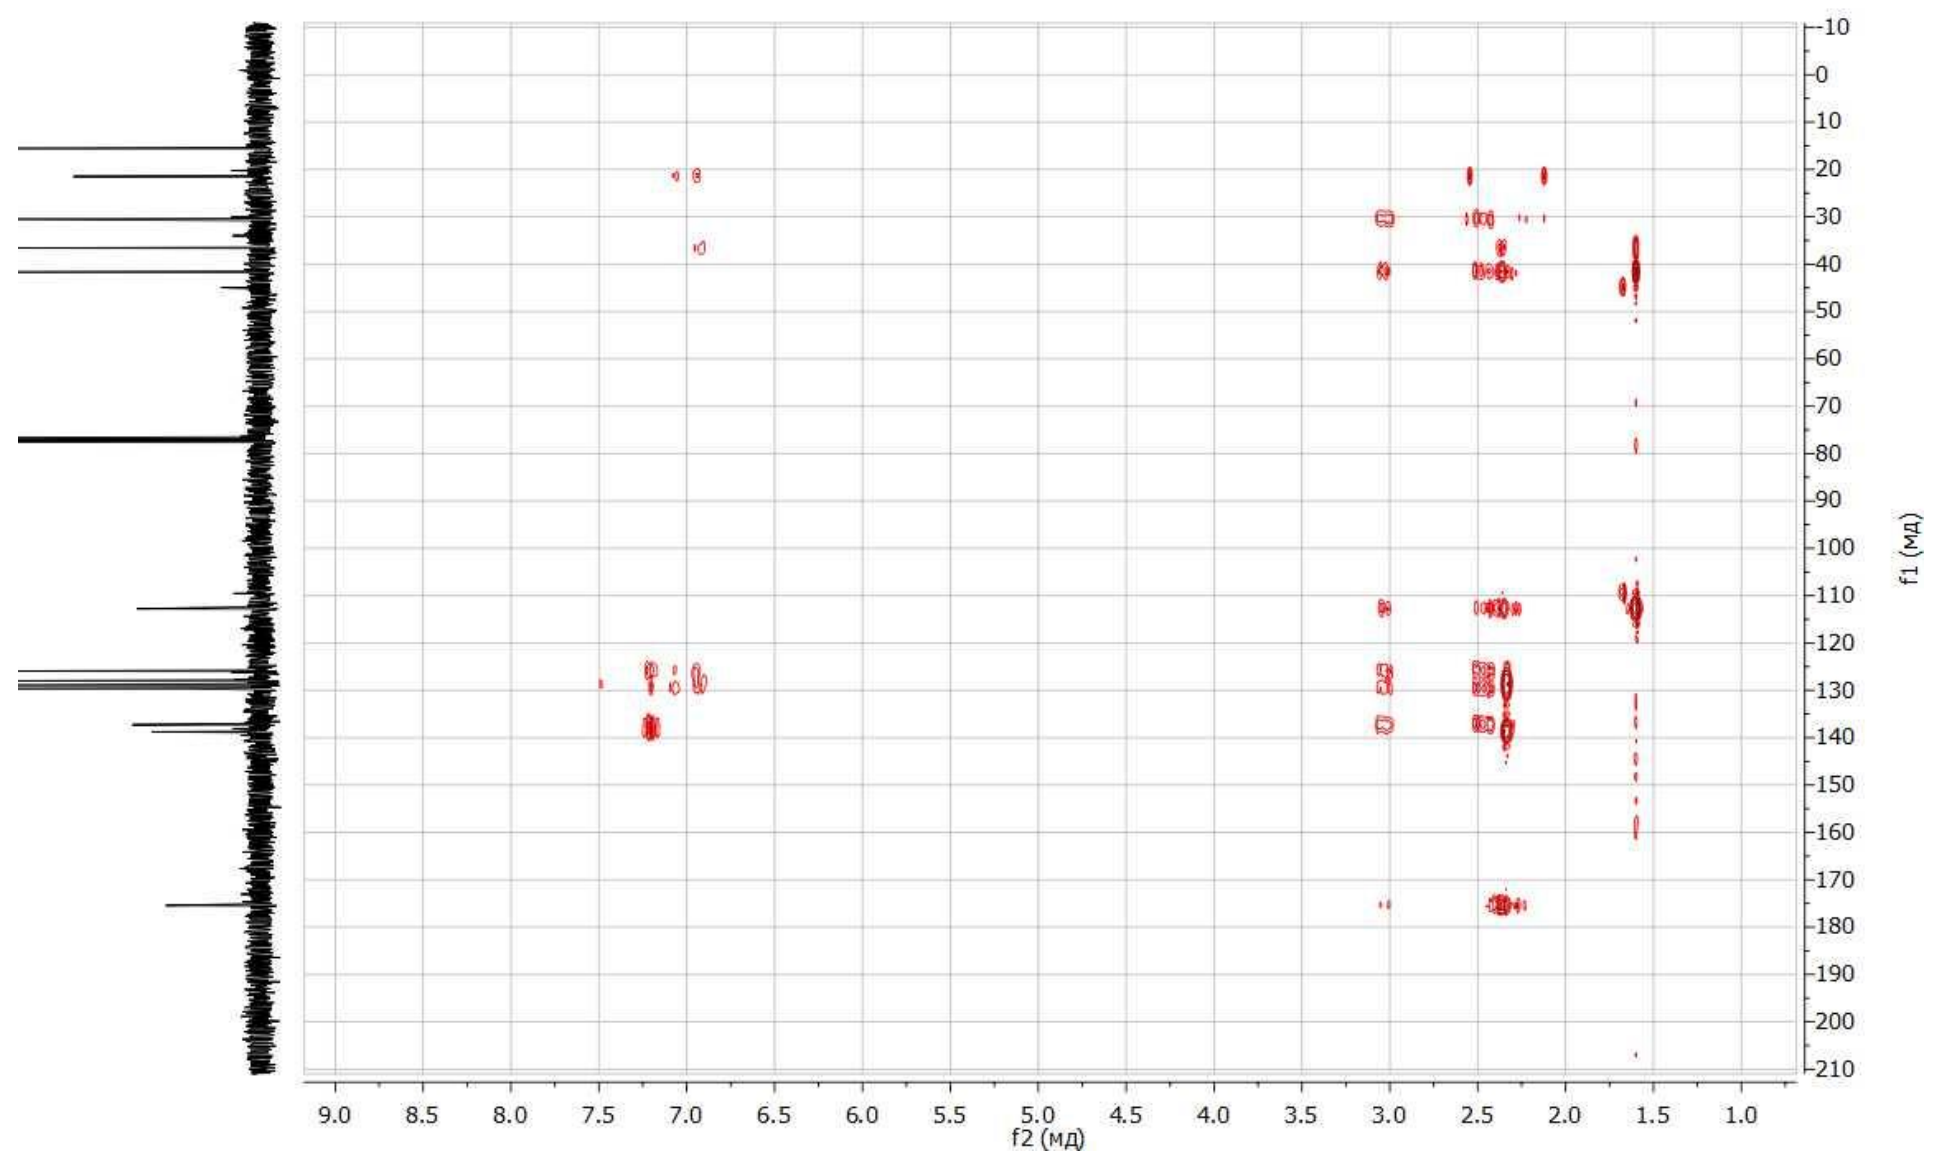

6-Hydroperoxy-6-methyl-5-(3-methoxybenzyl)-1,2-dioxan-3-one, 2h

<sup>1</sup>H NMR

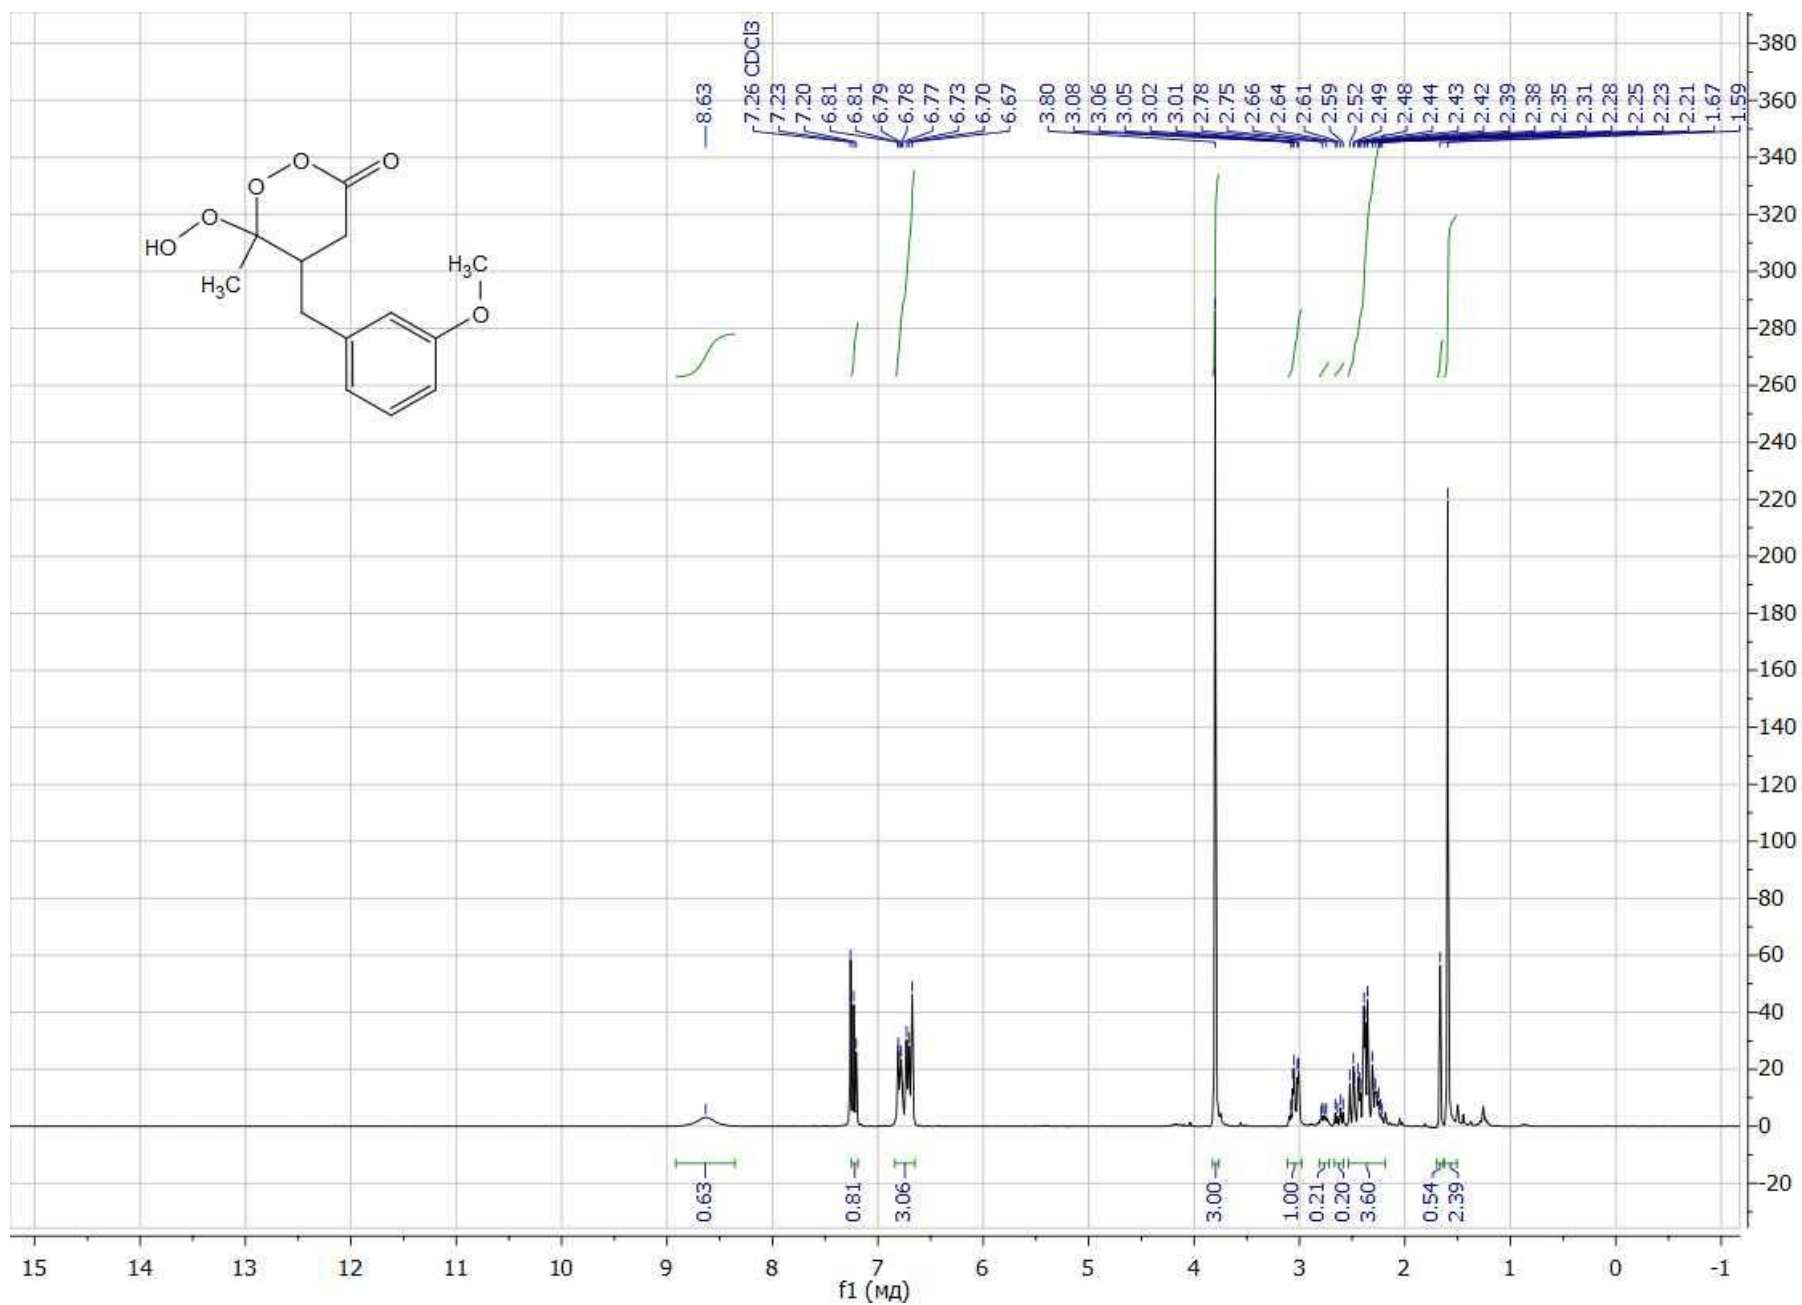

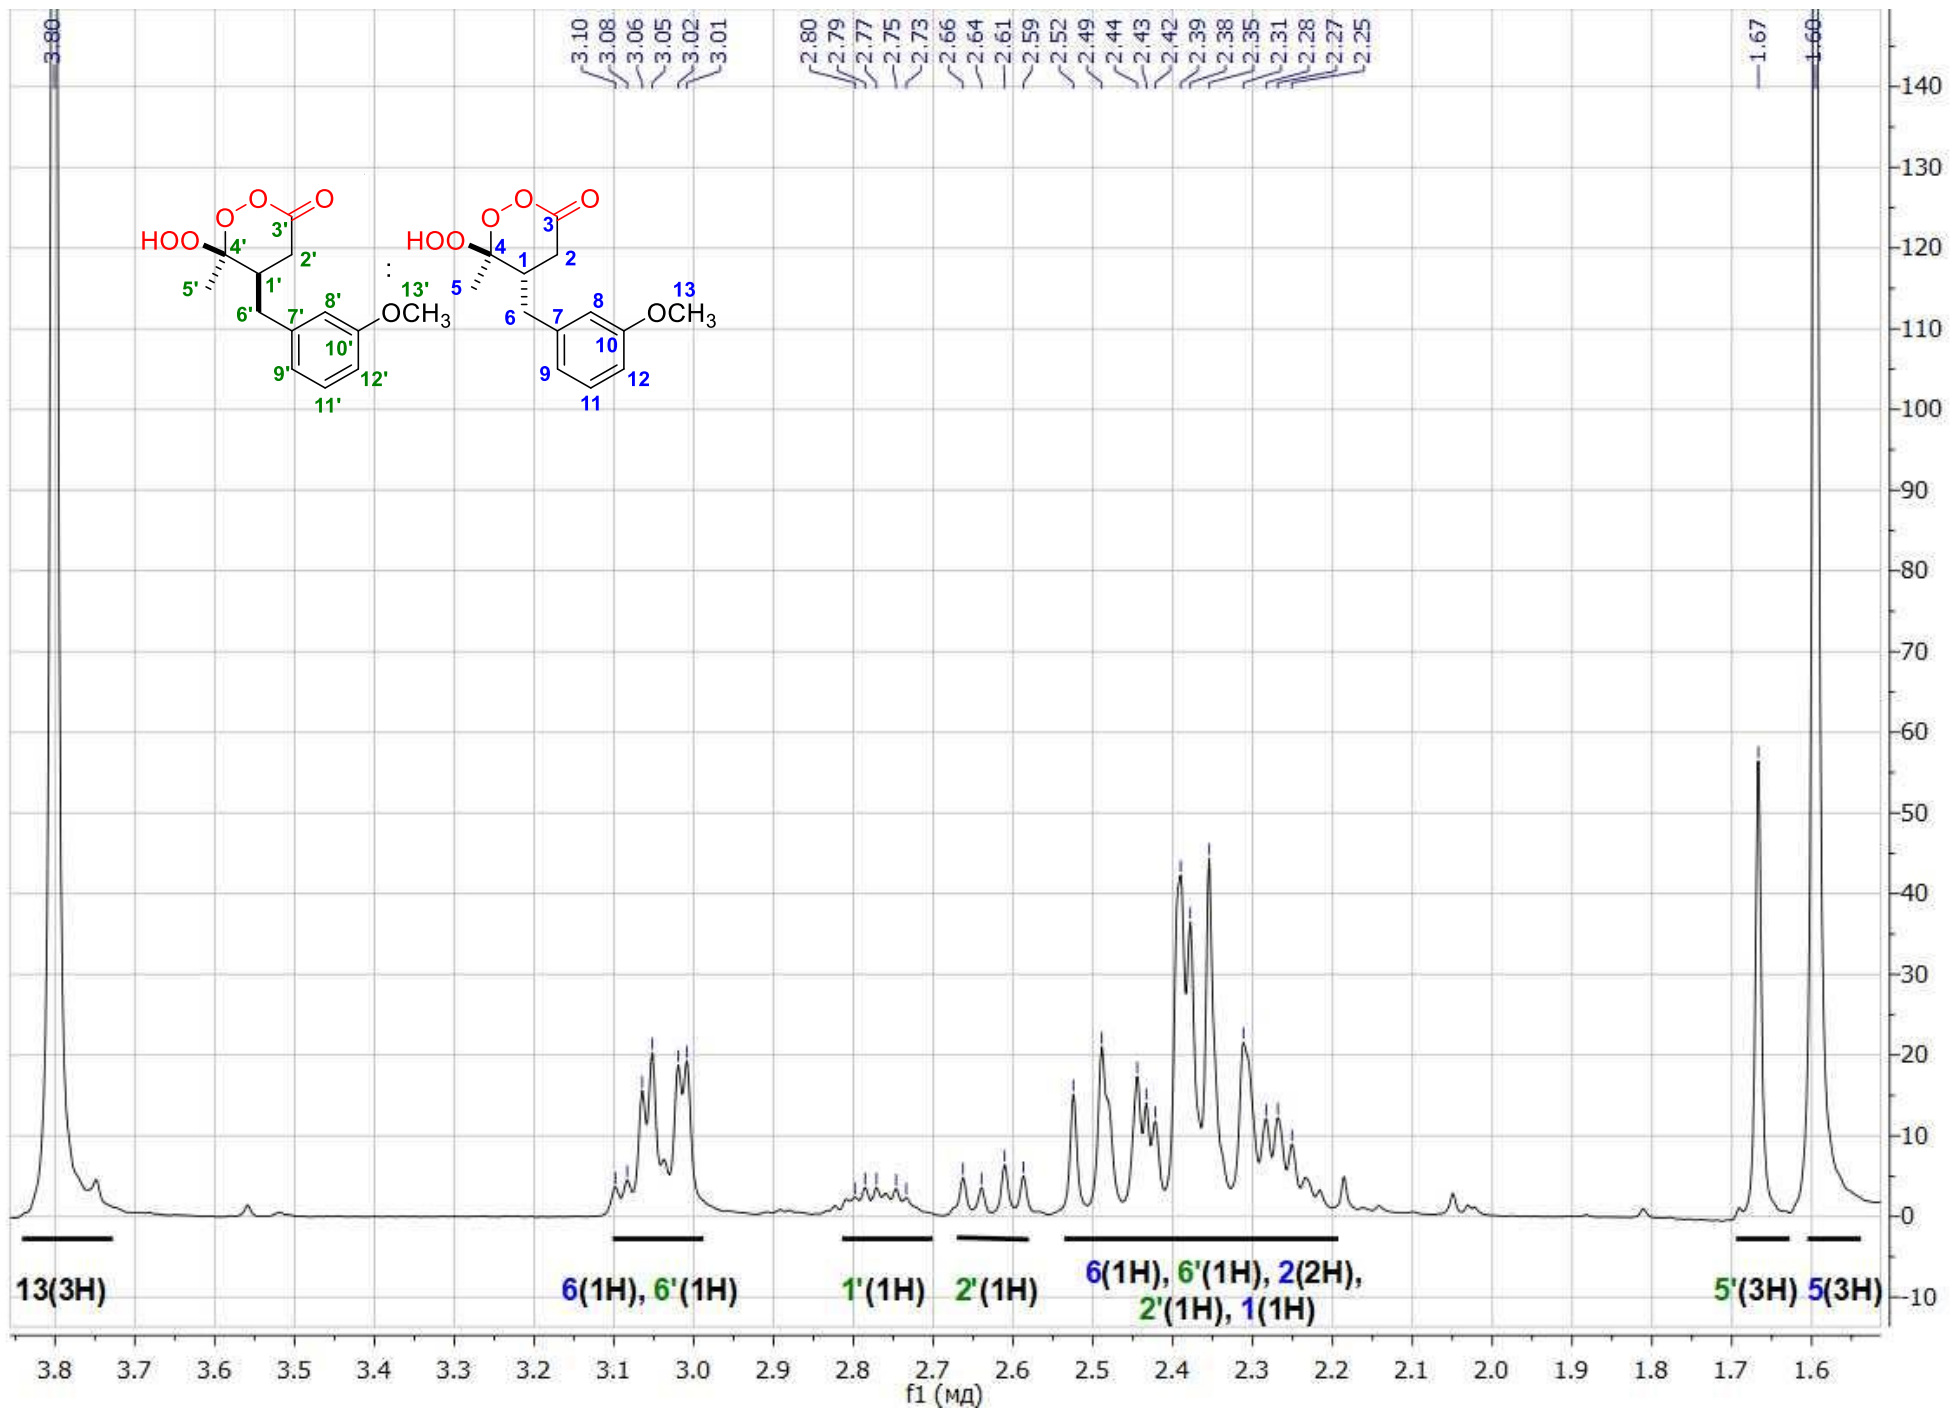



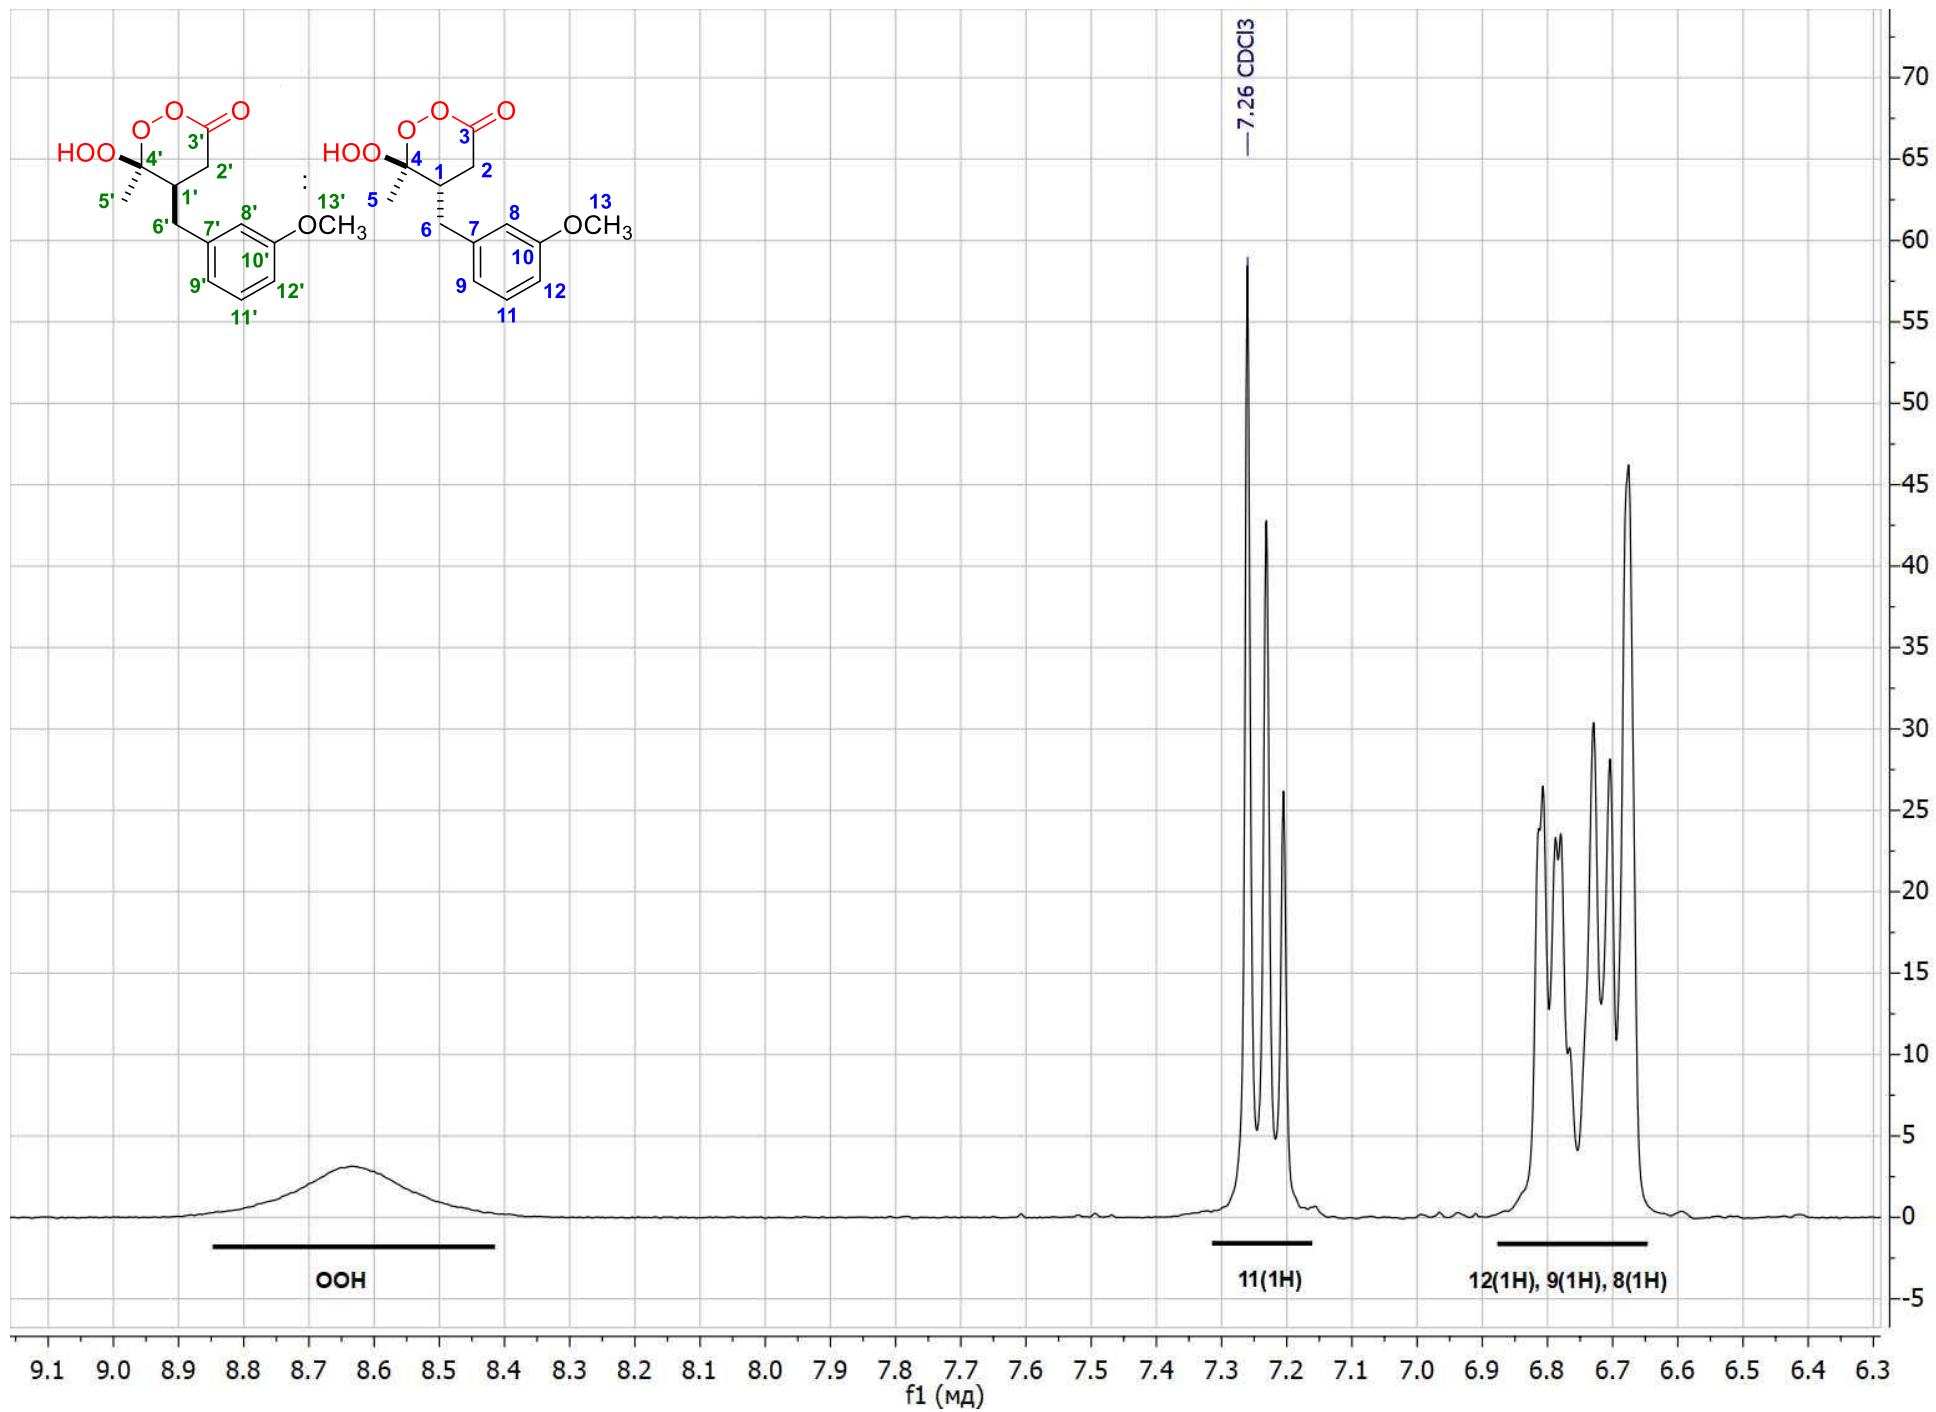

<sup>13</sup>C NMR

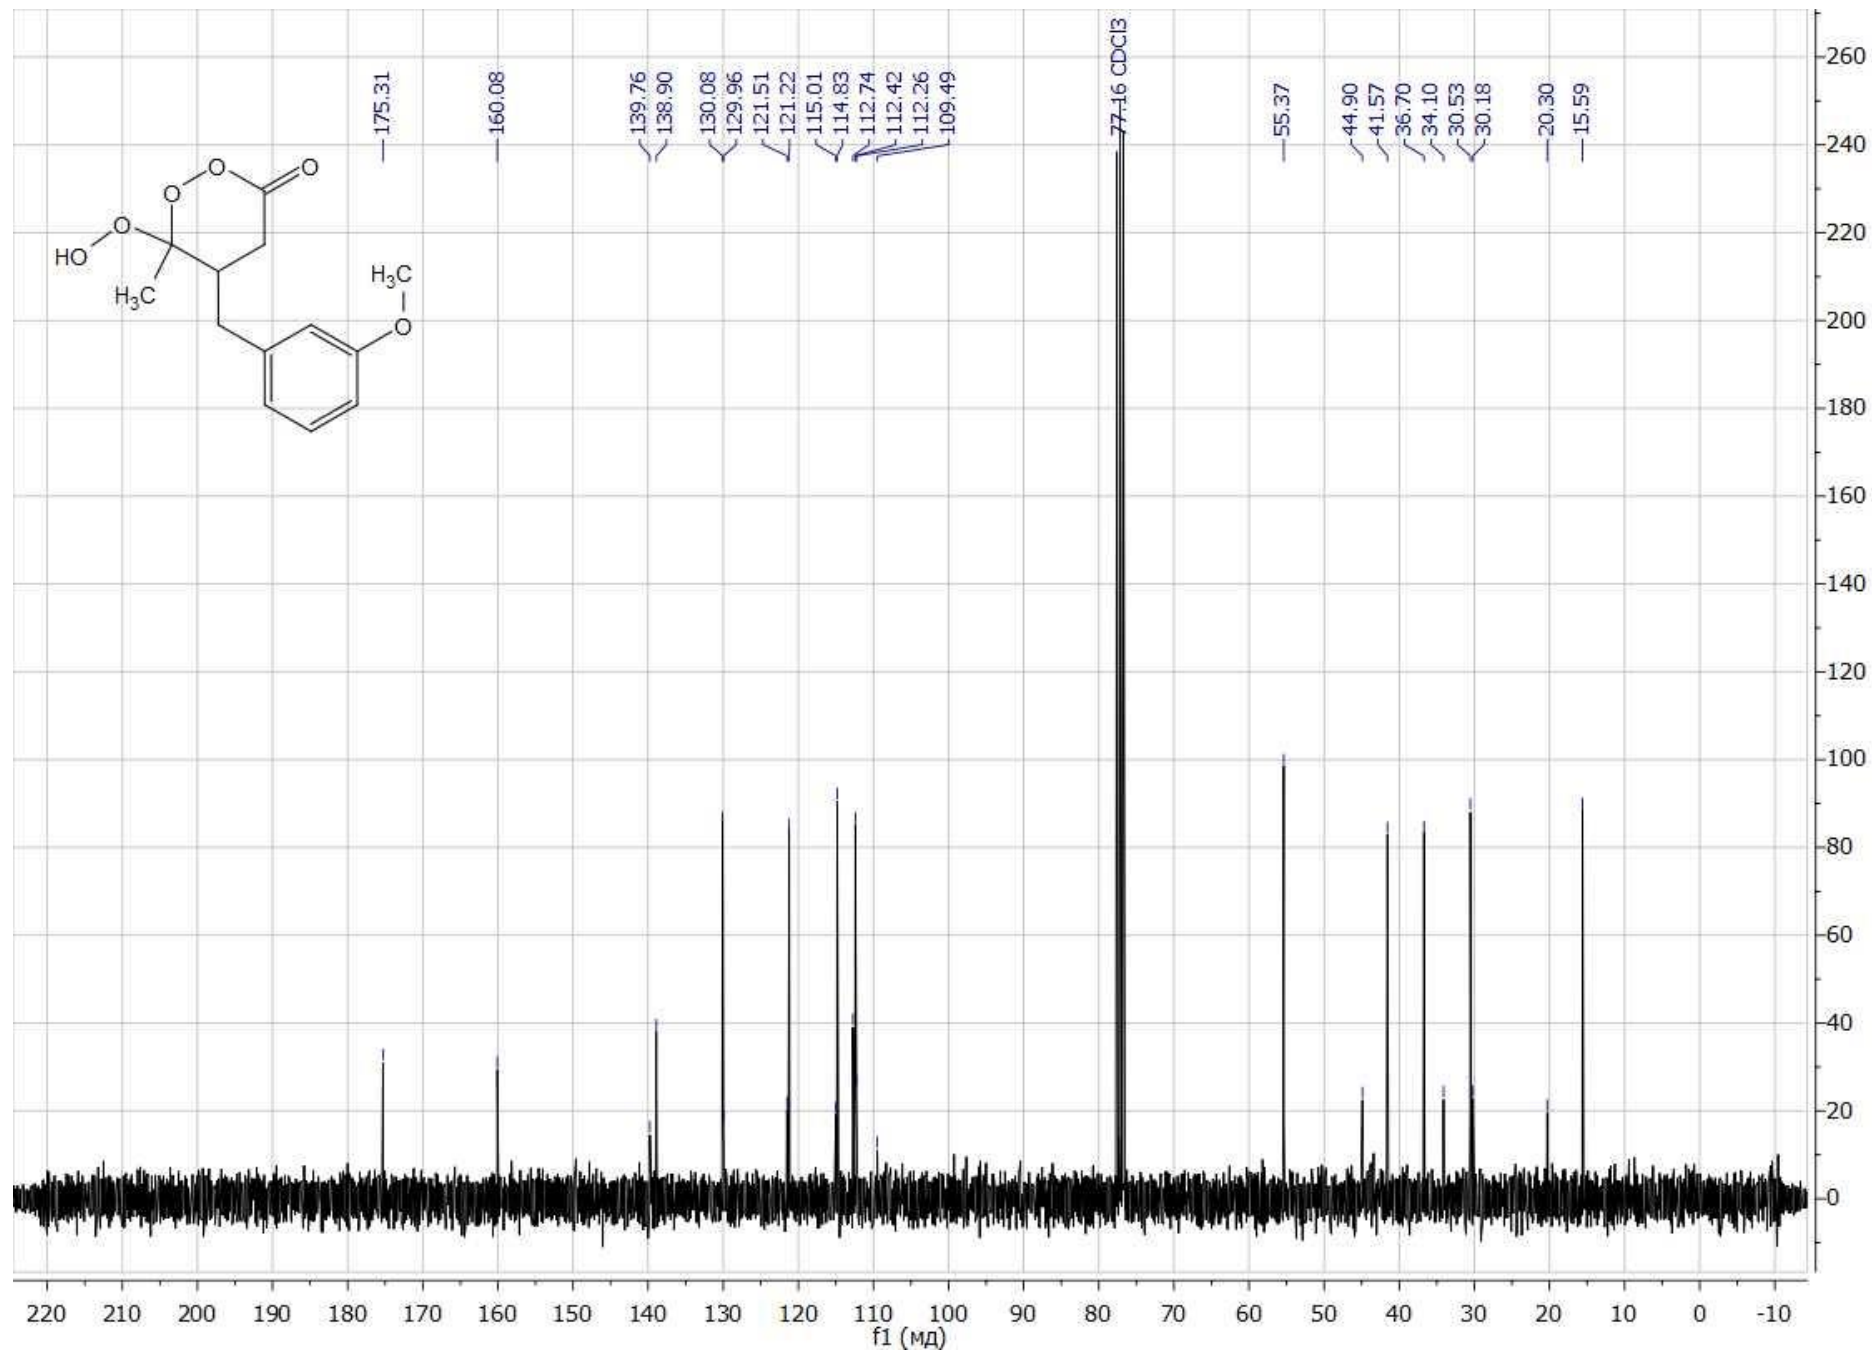

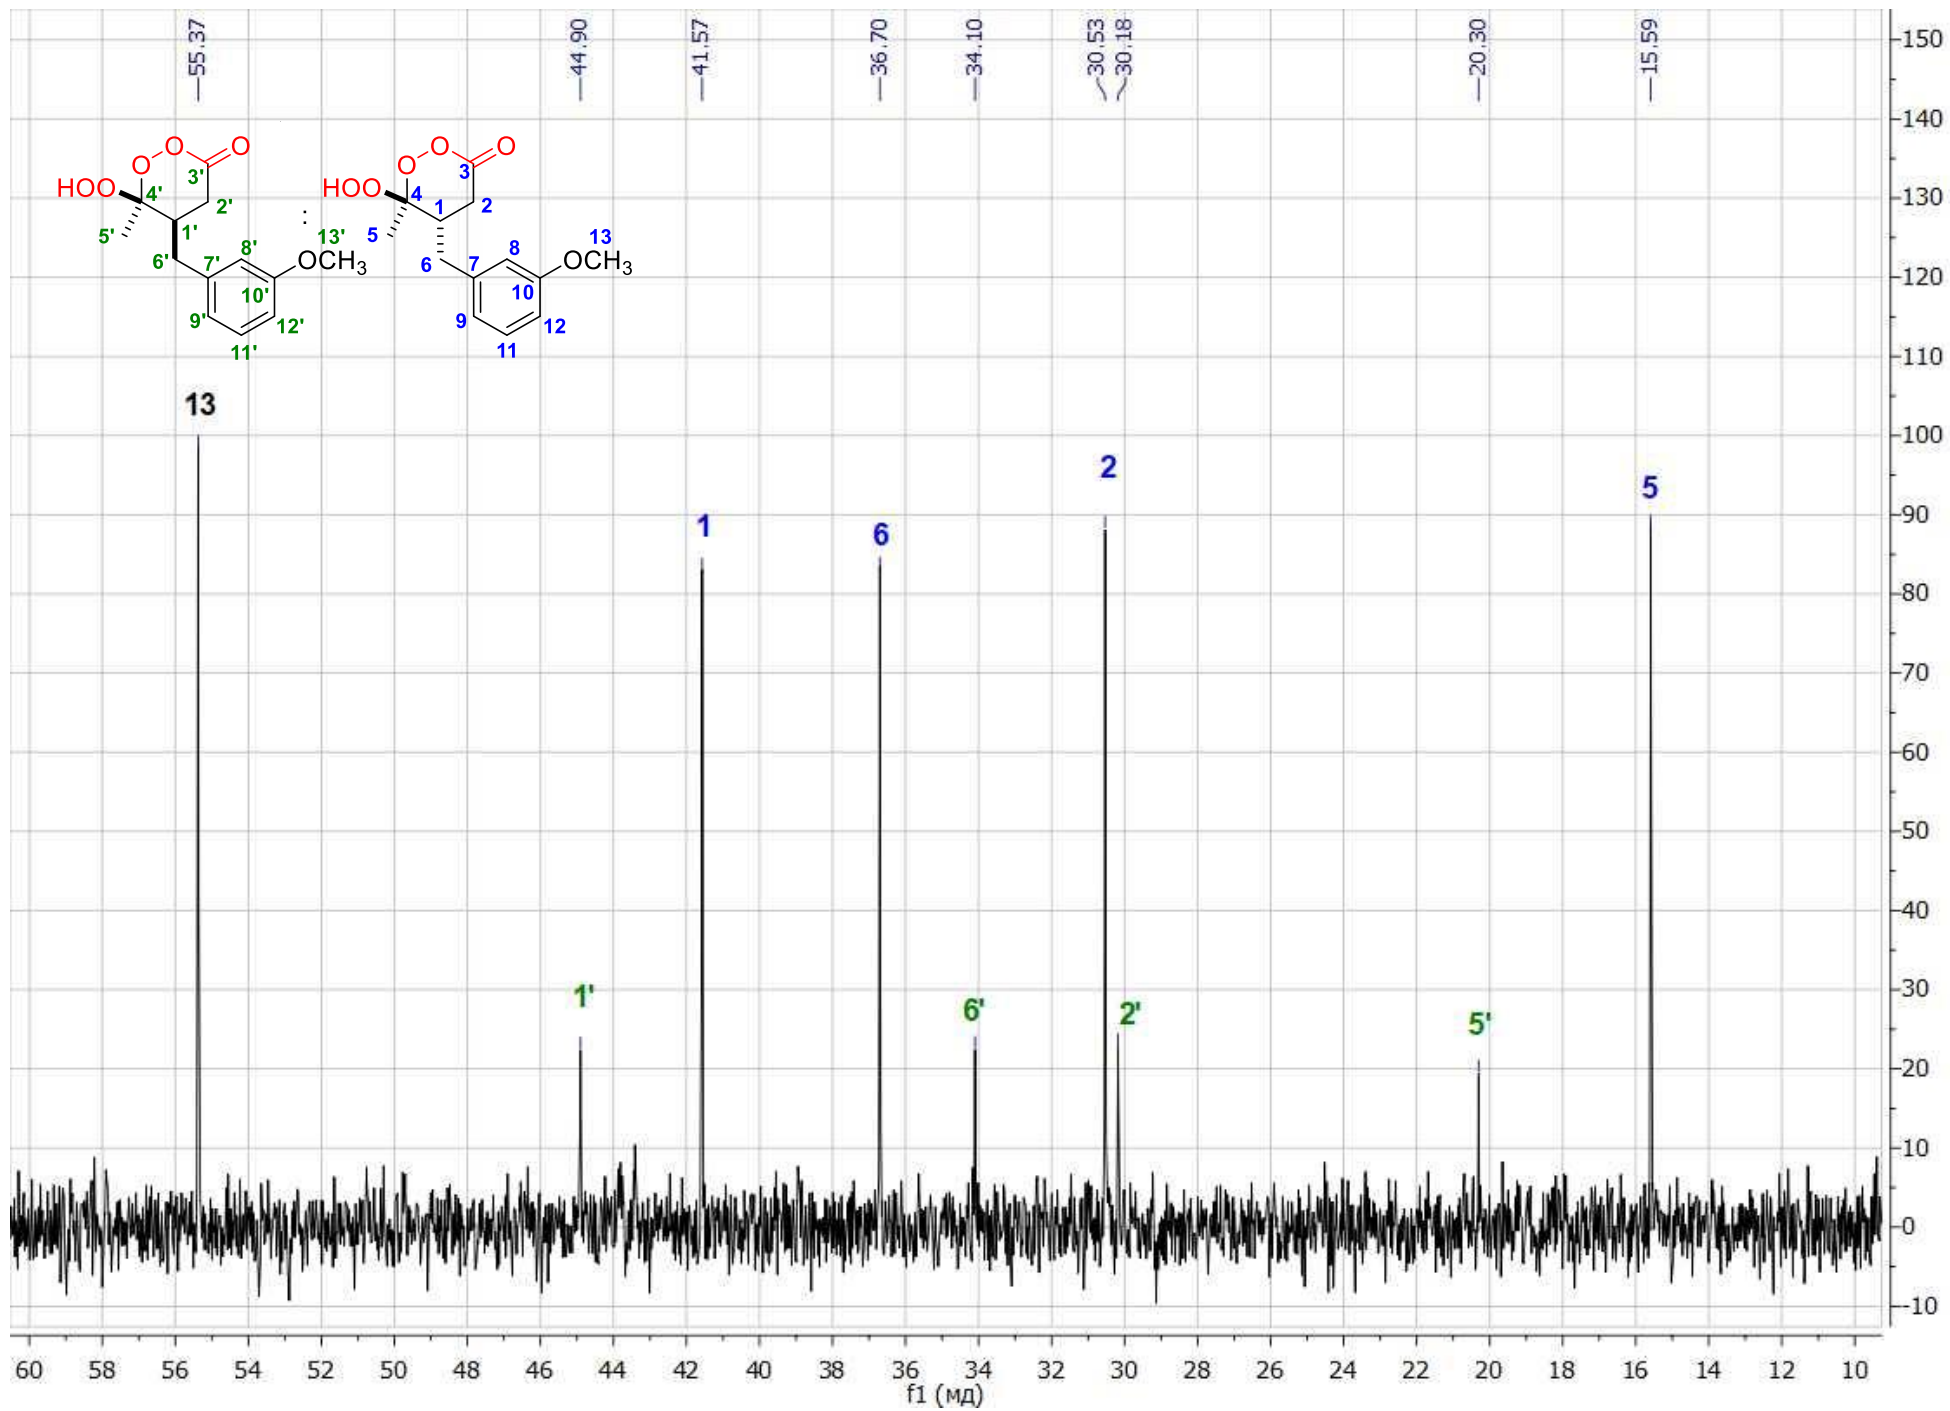

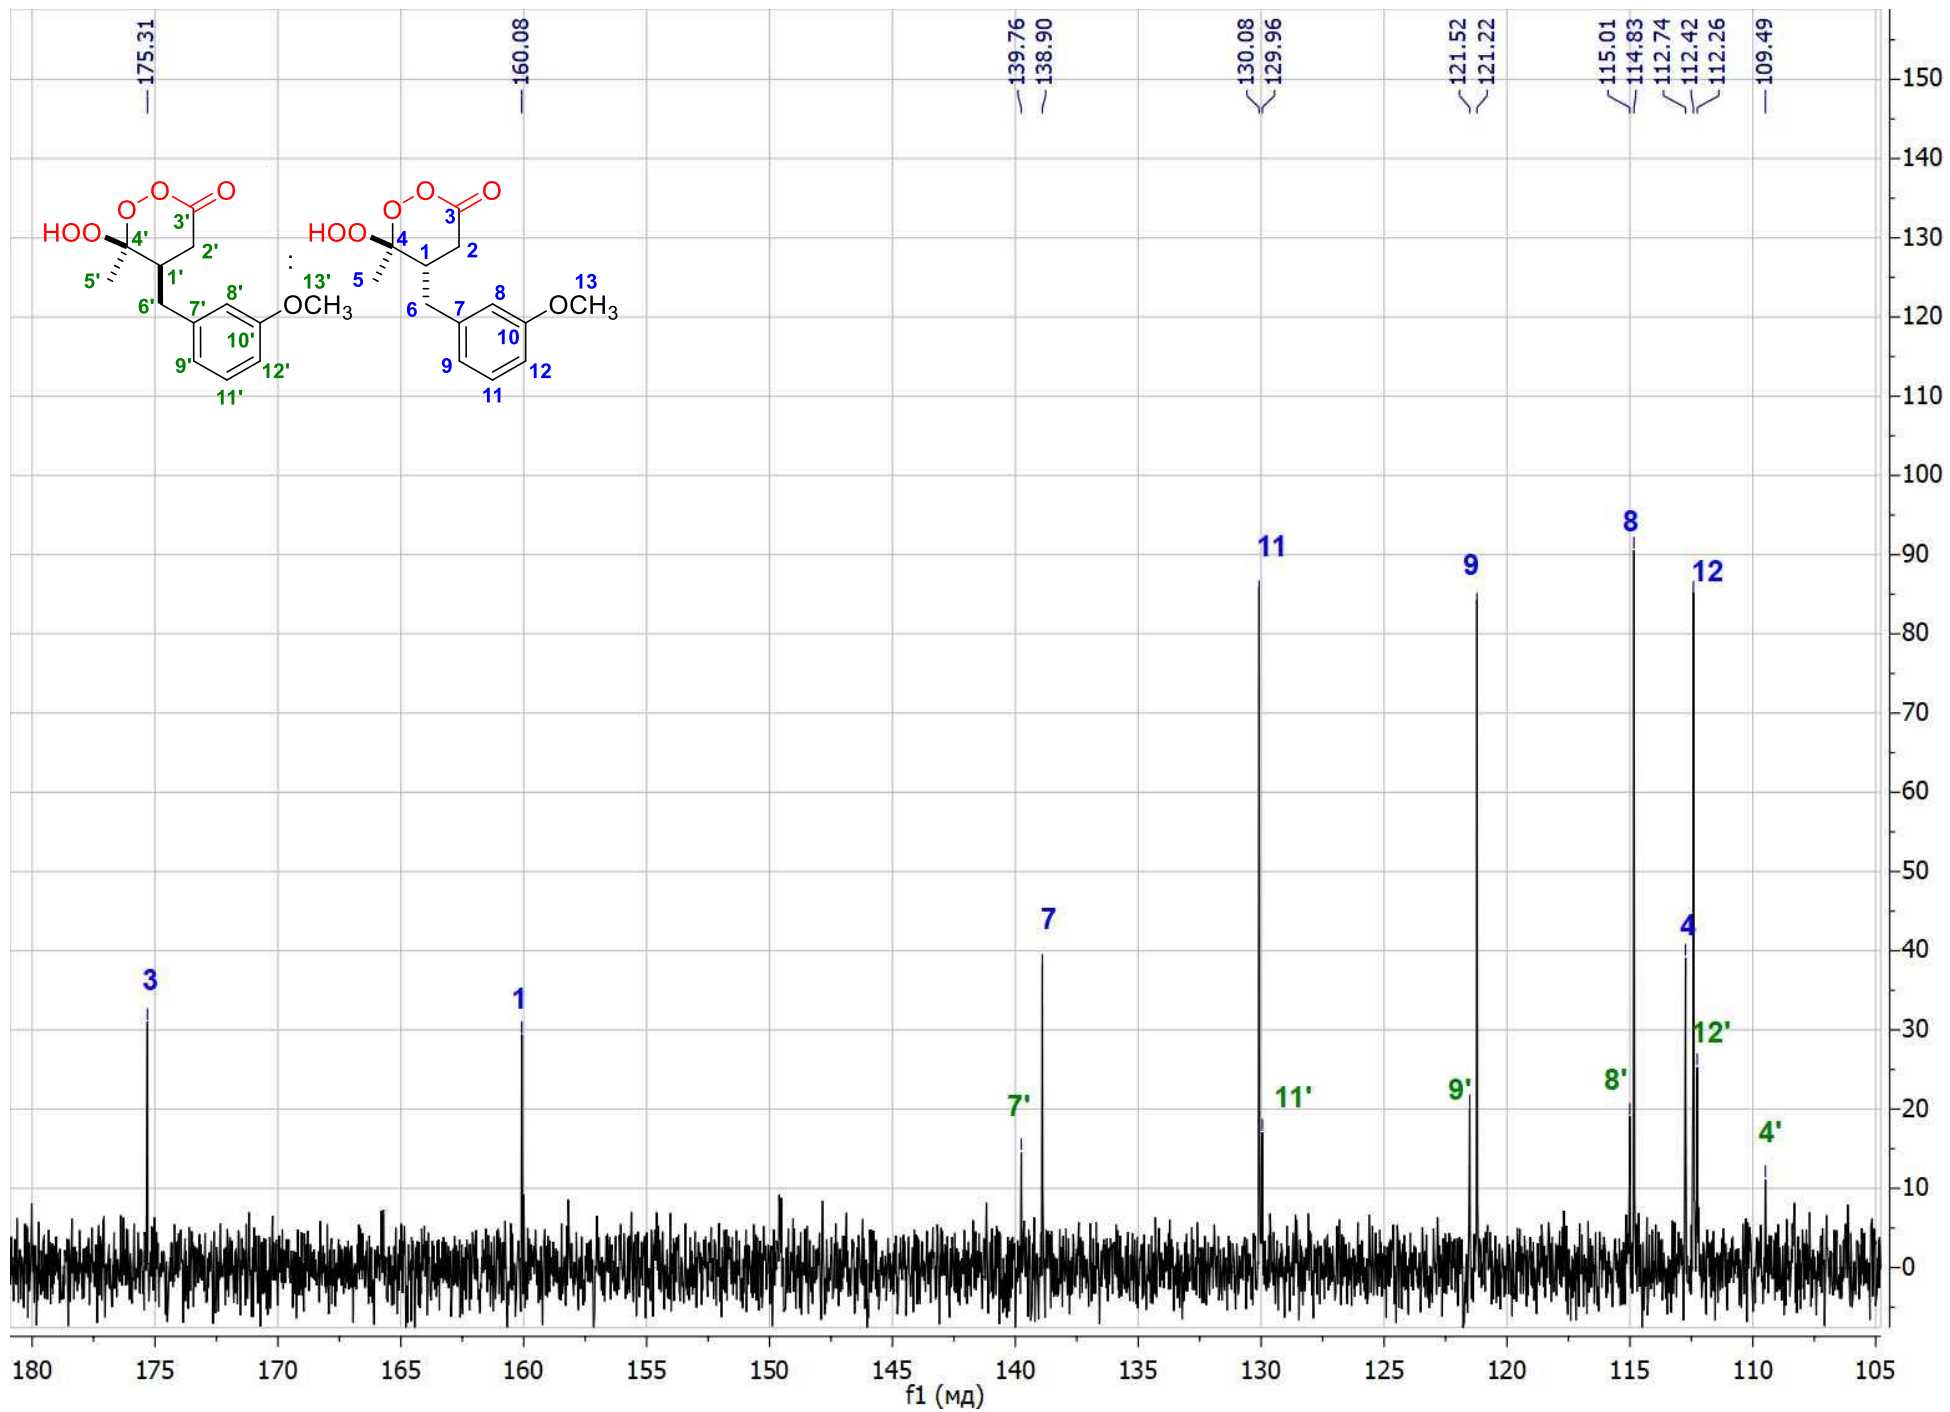

<sup>13</sup>C\_deptsp135

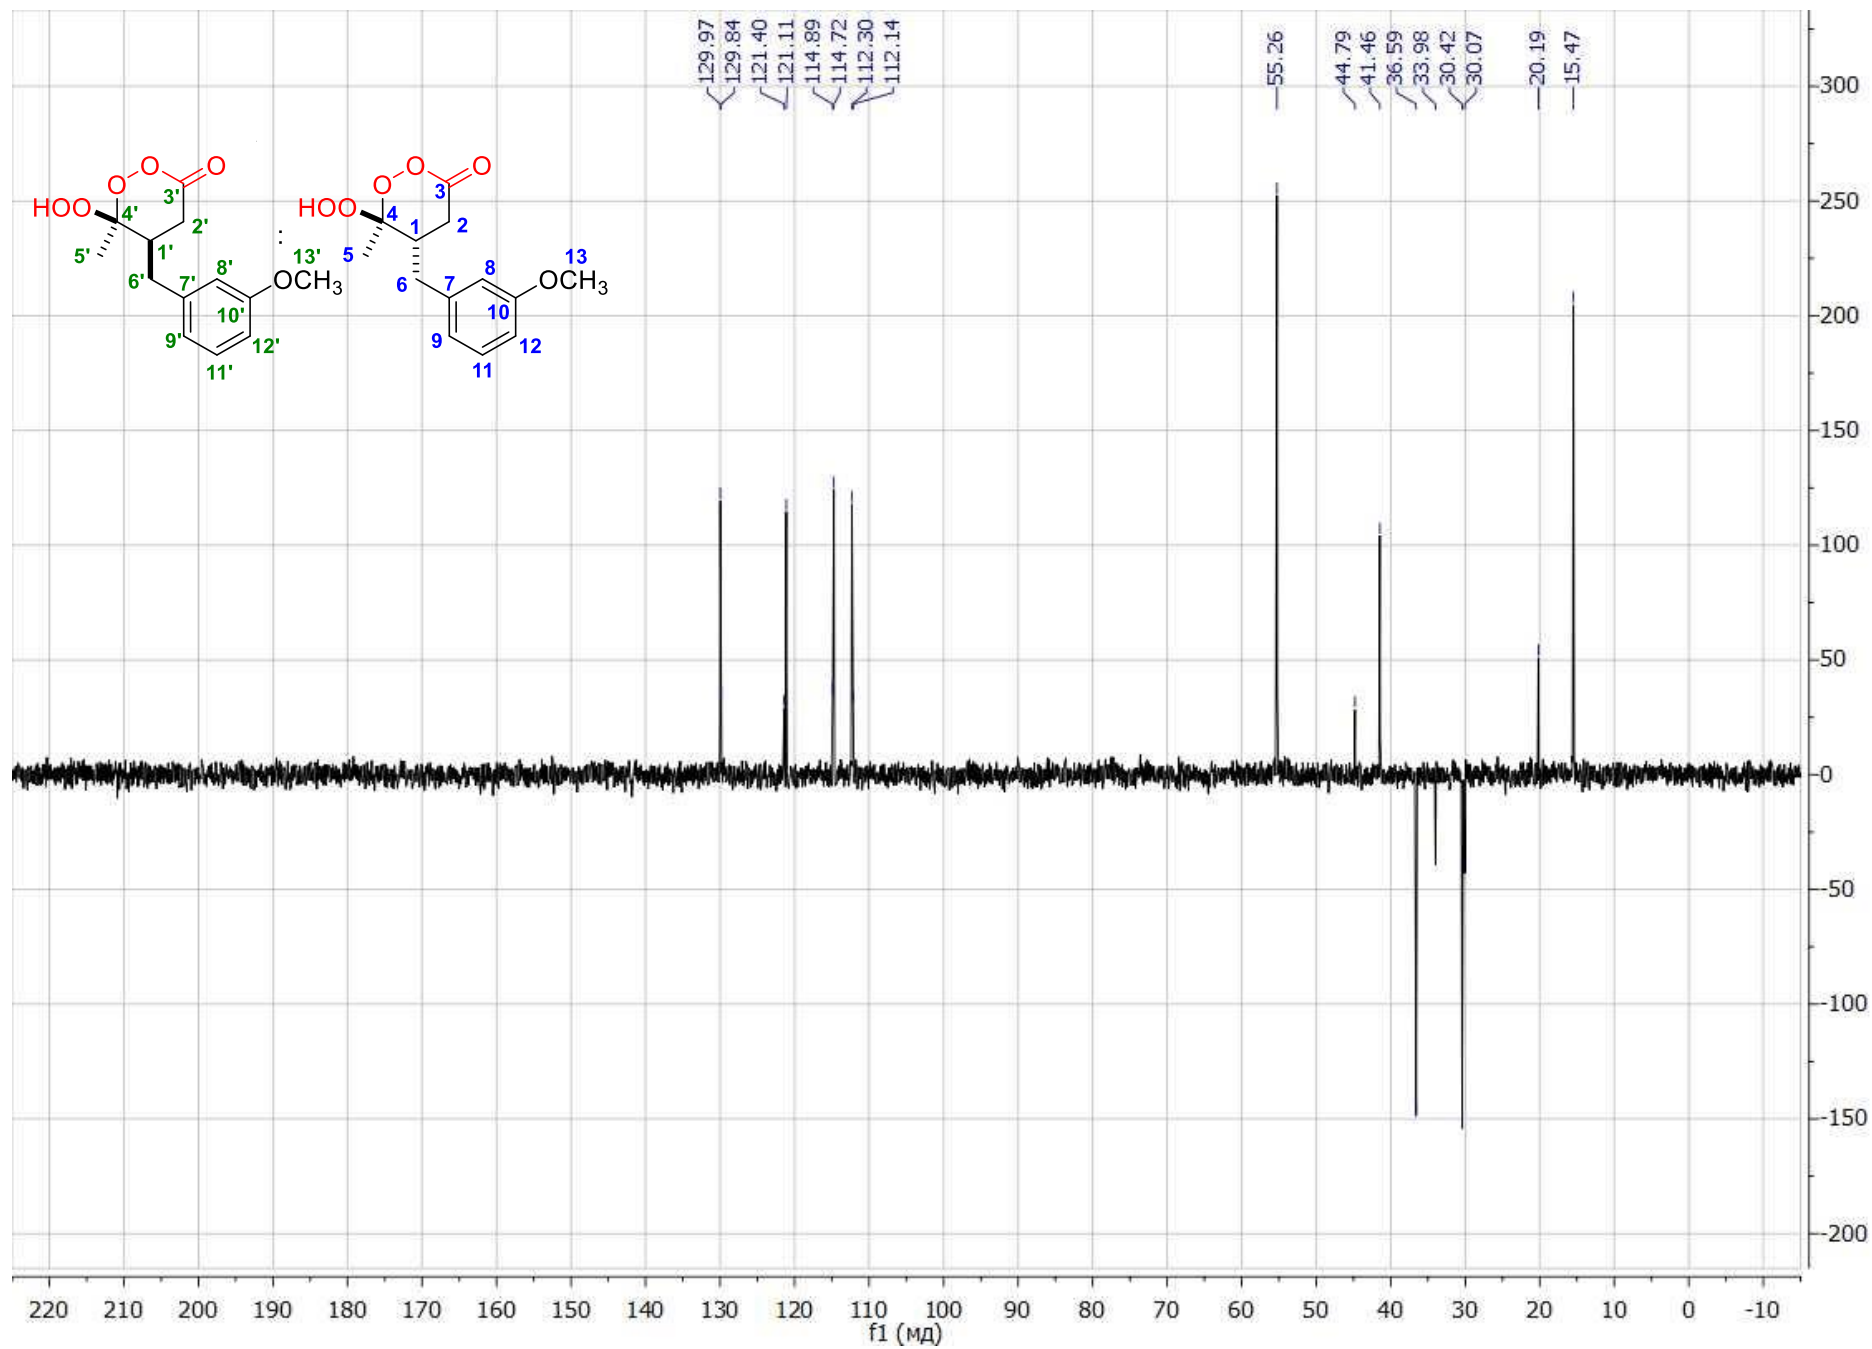

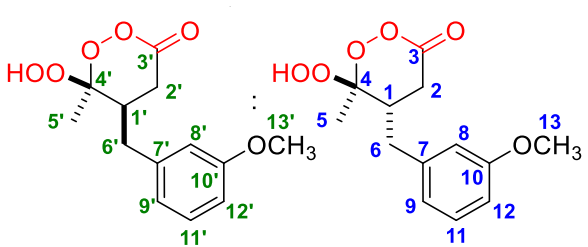

{<sup>1</sup>H-<sup>1</sup>H} COSY

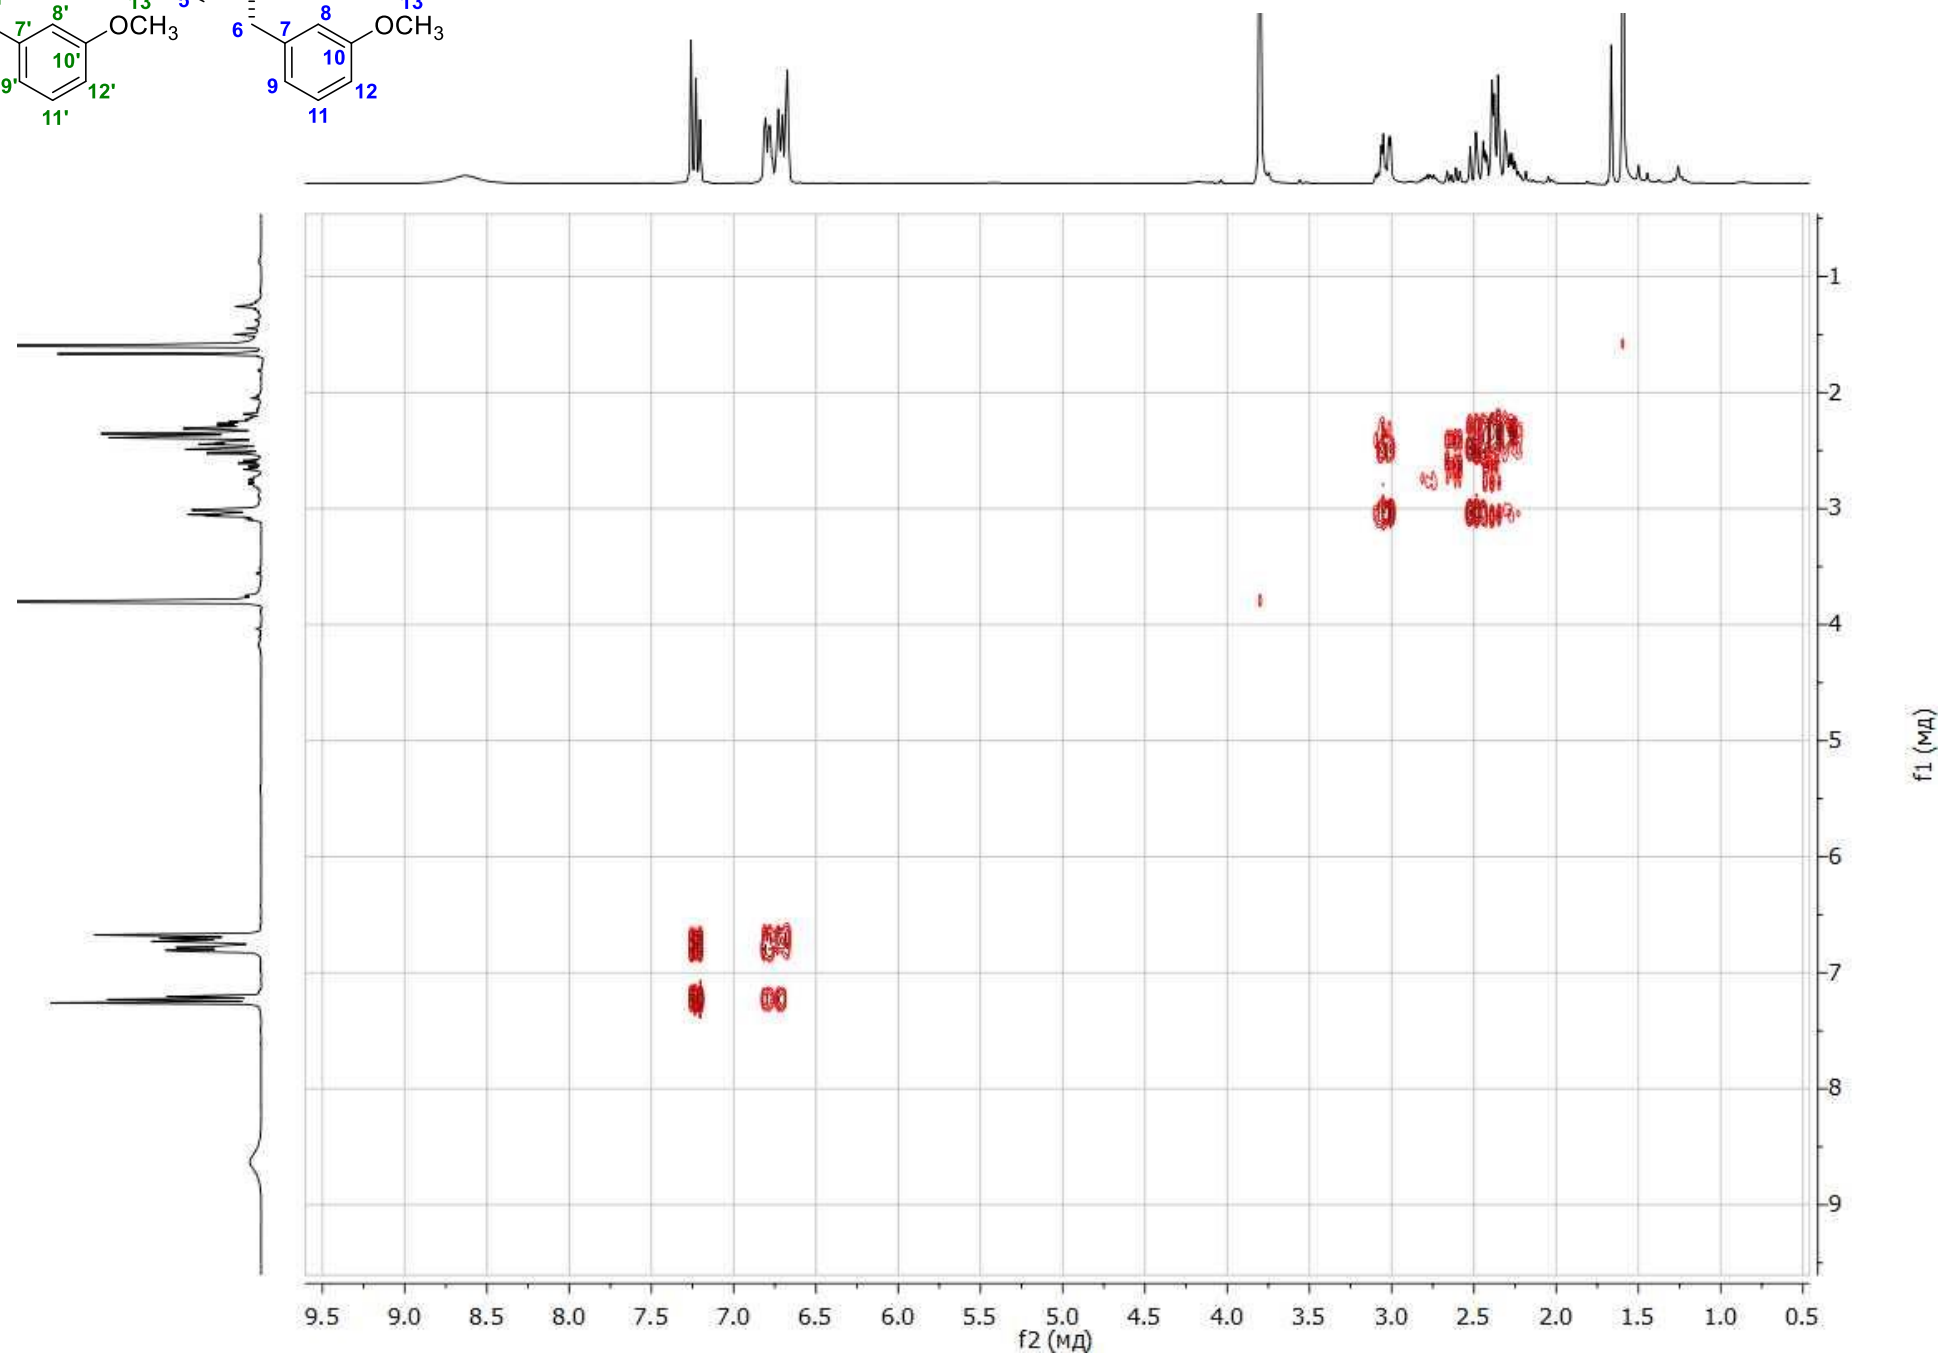

{<sup>1</sup>H-<sup>1</sup>H} NOESY

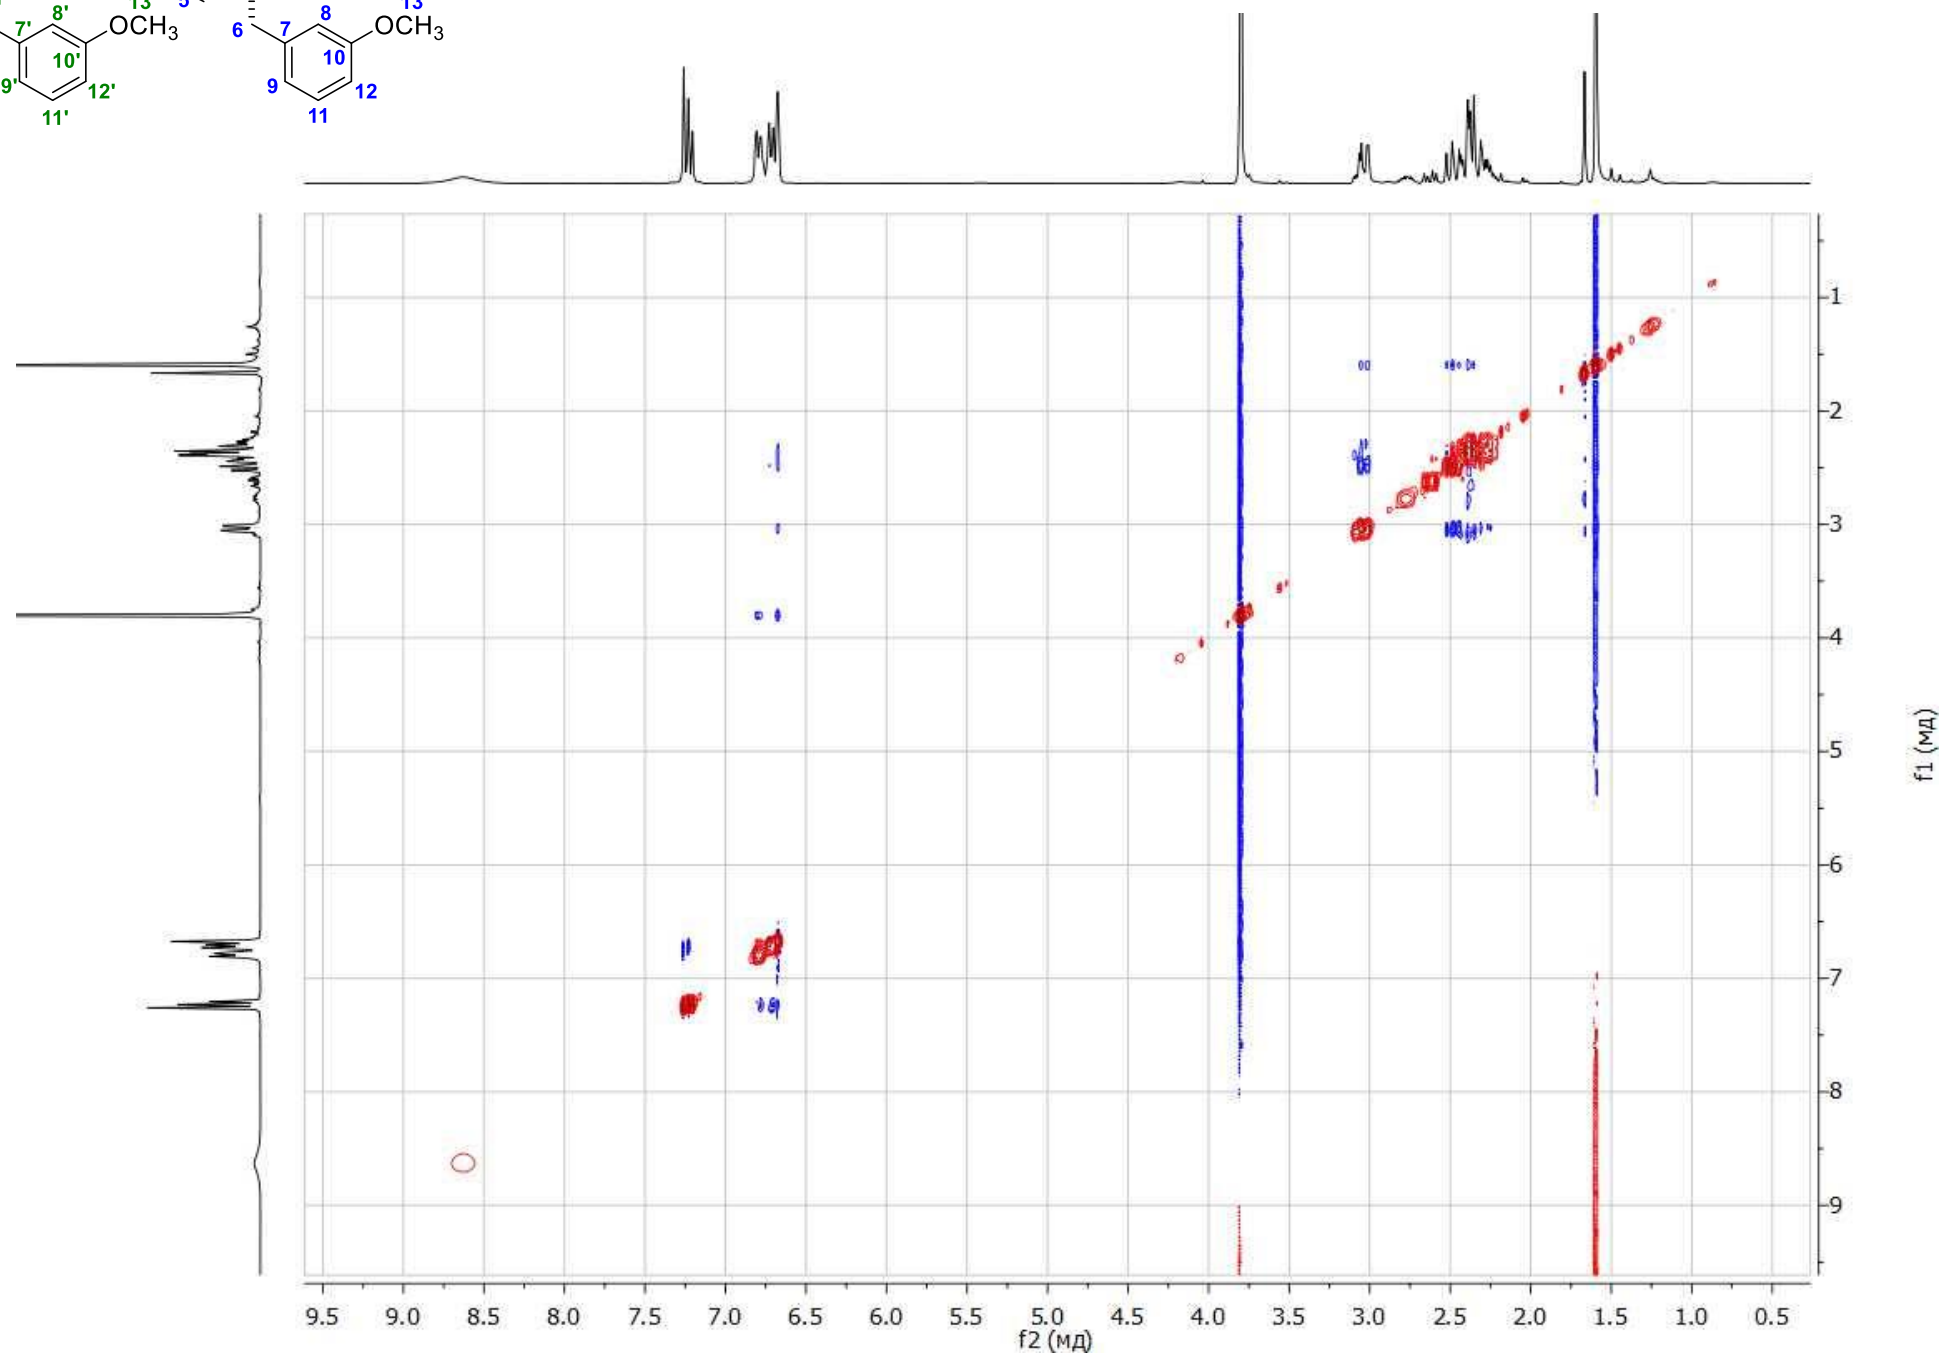

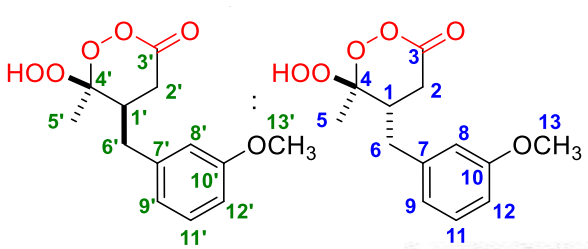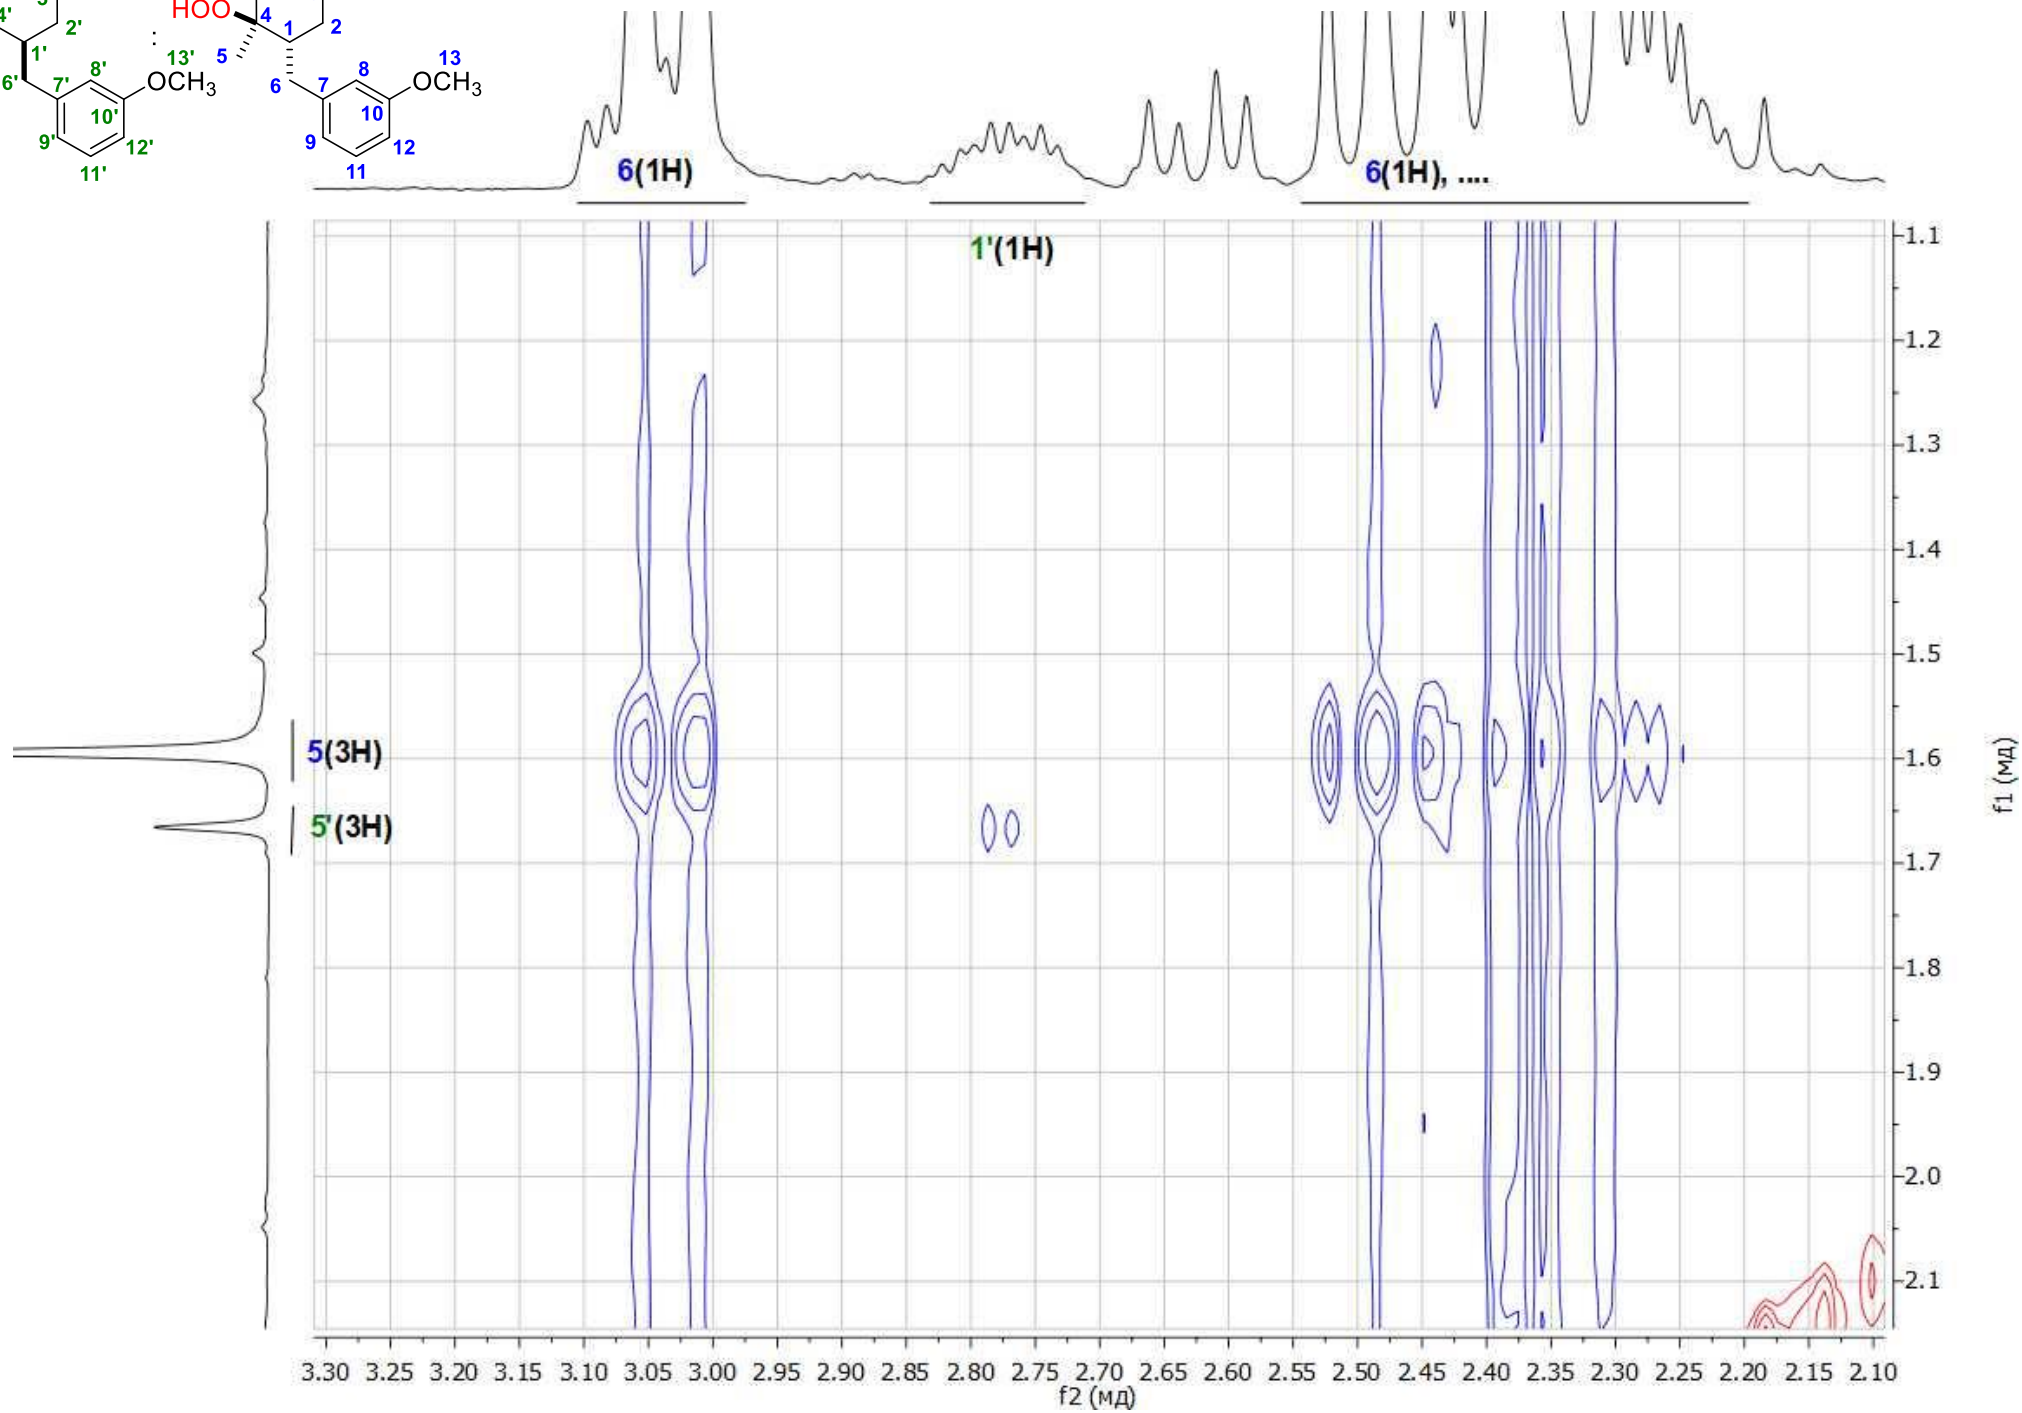



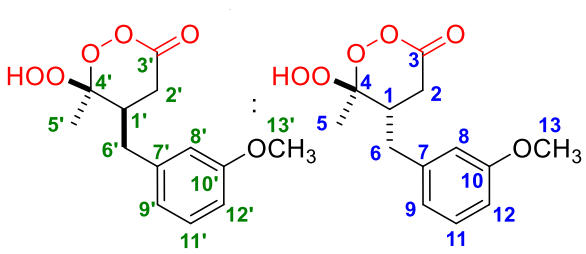

{<sup>1</sup>H-<sup>13</sup>C} HSQC

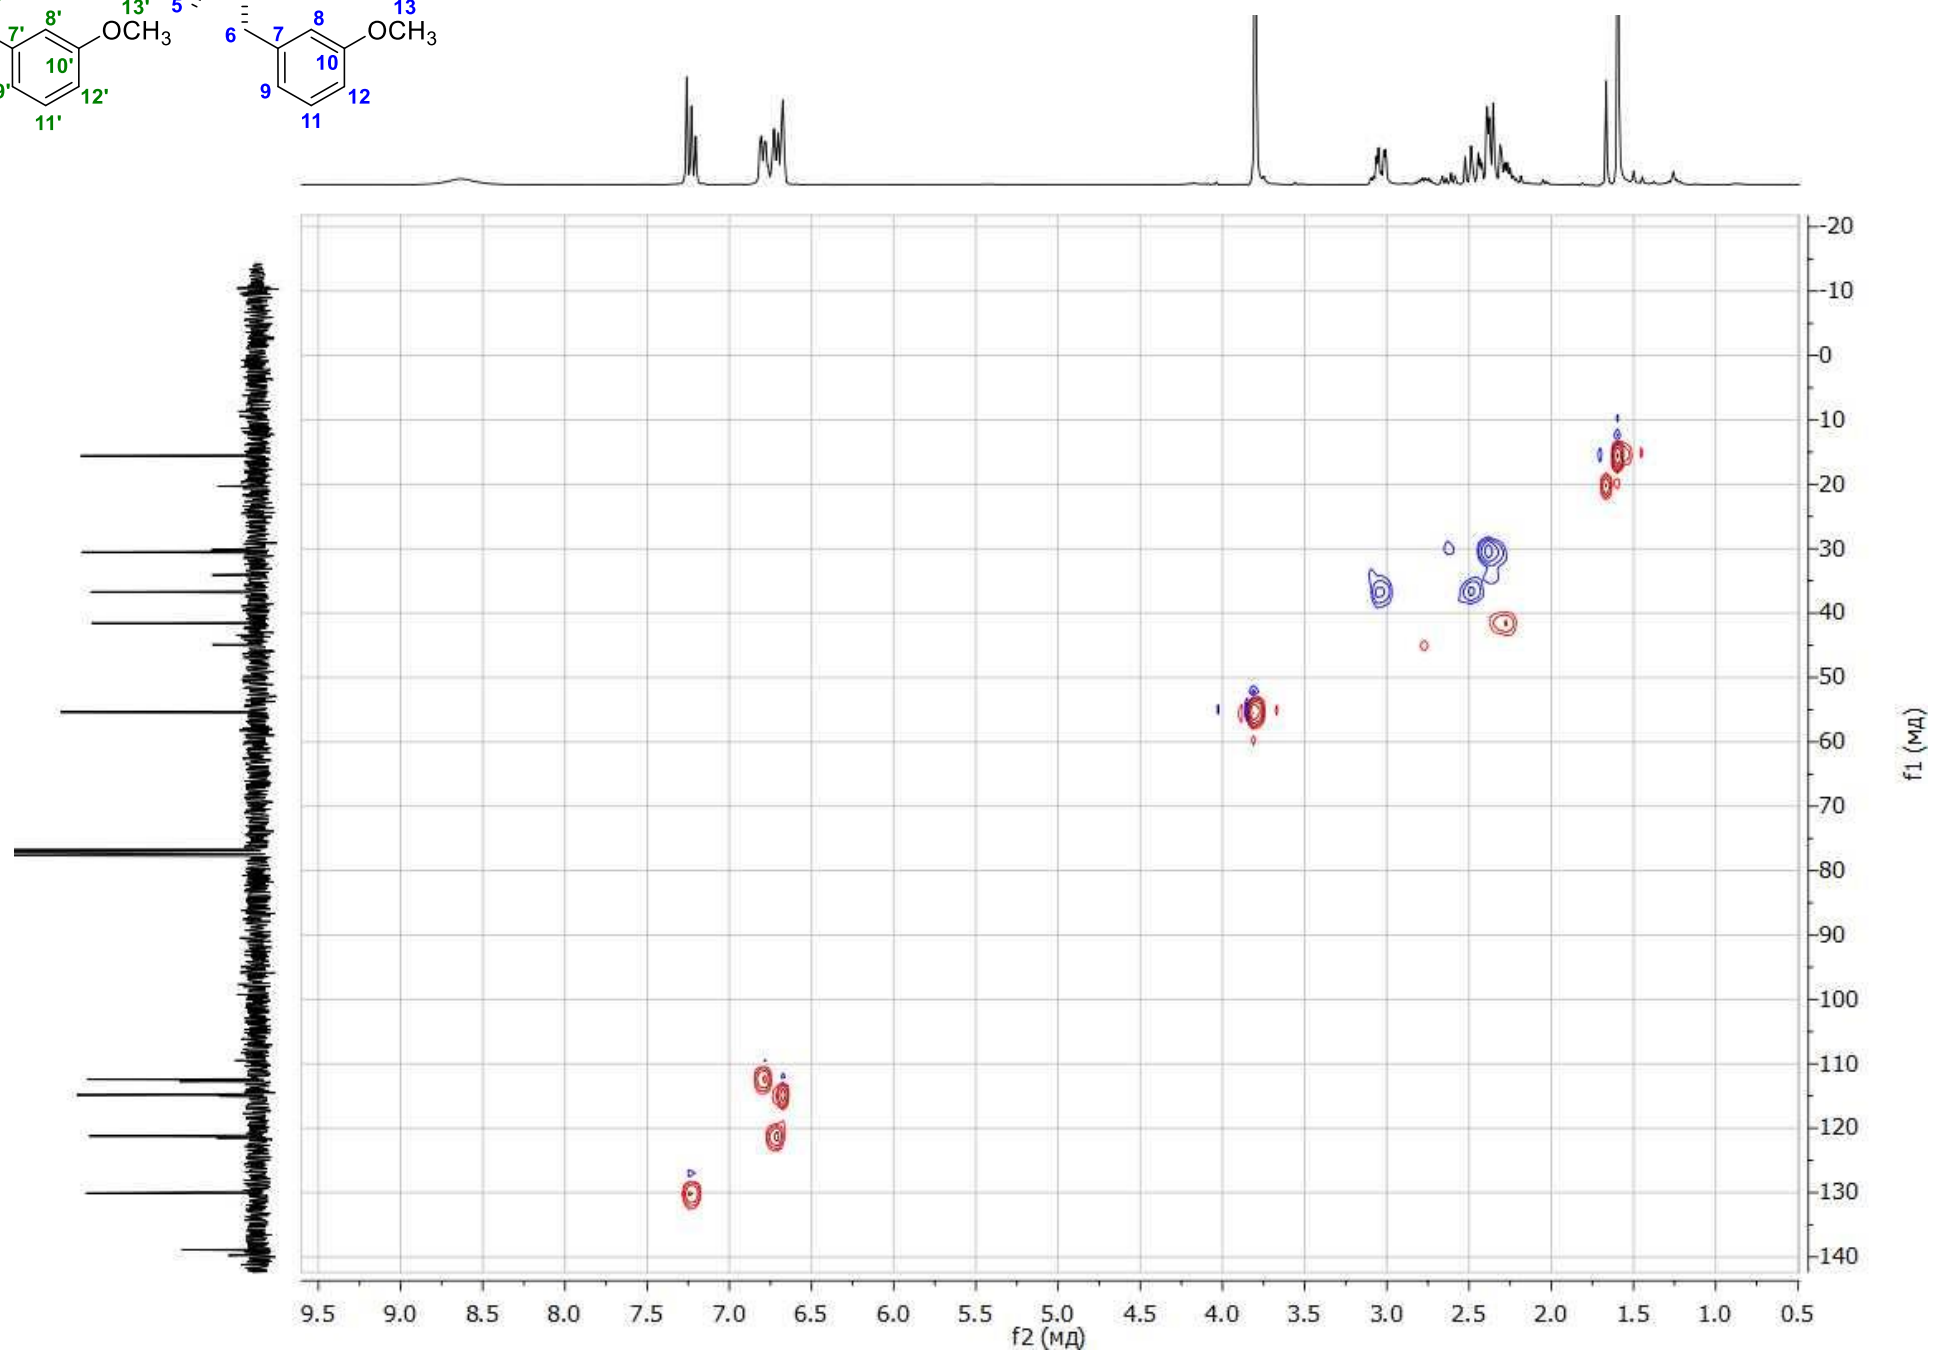



{<sup>1</sup>H-<sup>13</sup>C} HMBC

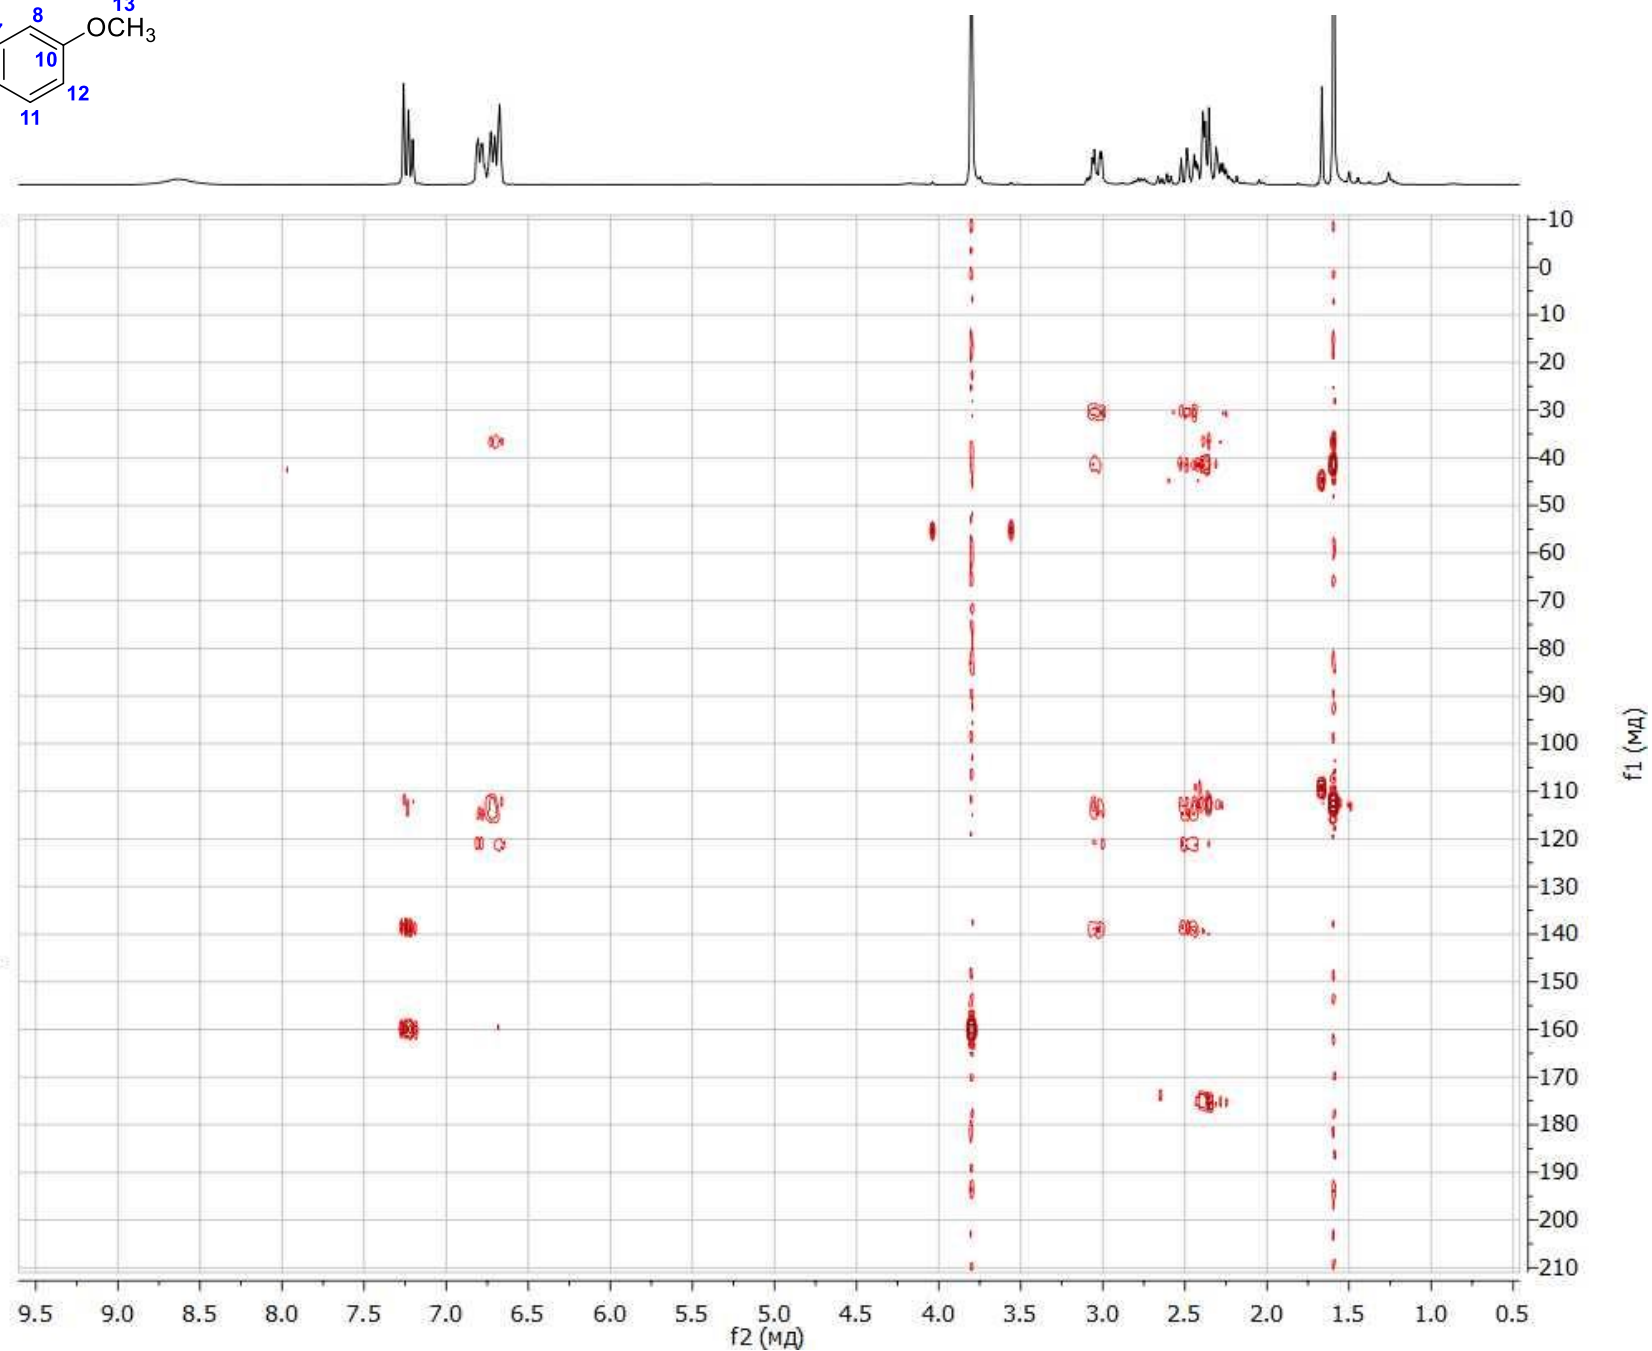

# 5-(2-Chlorobenzyl)-6-hydroperoxy-6-methyl-1,2-dioxan-3-one, 2i

## <sup>1</sup>H NMR

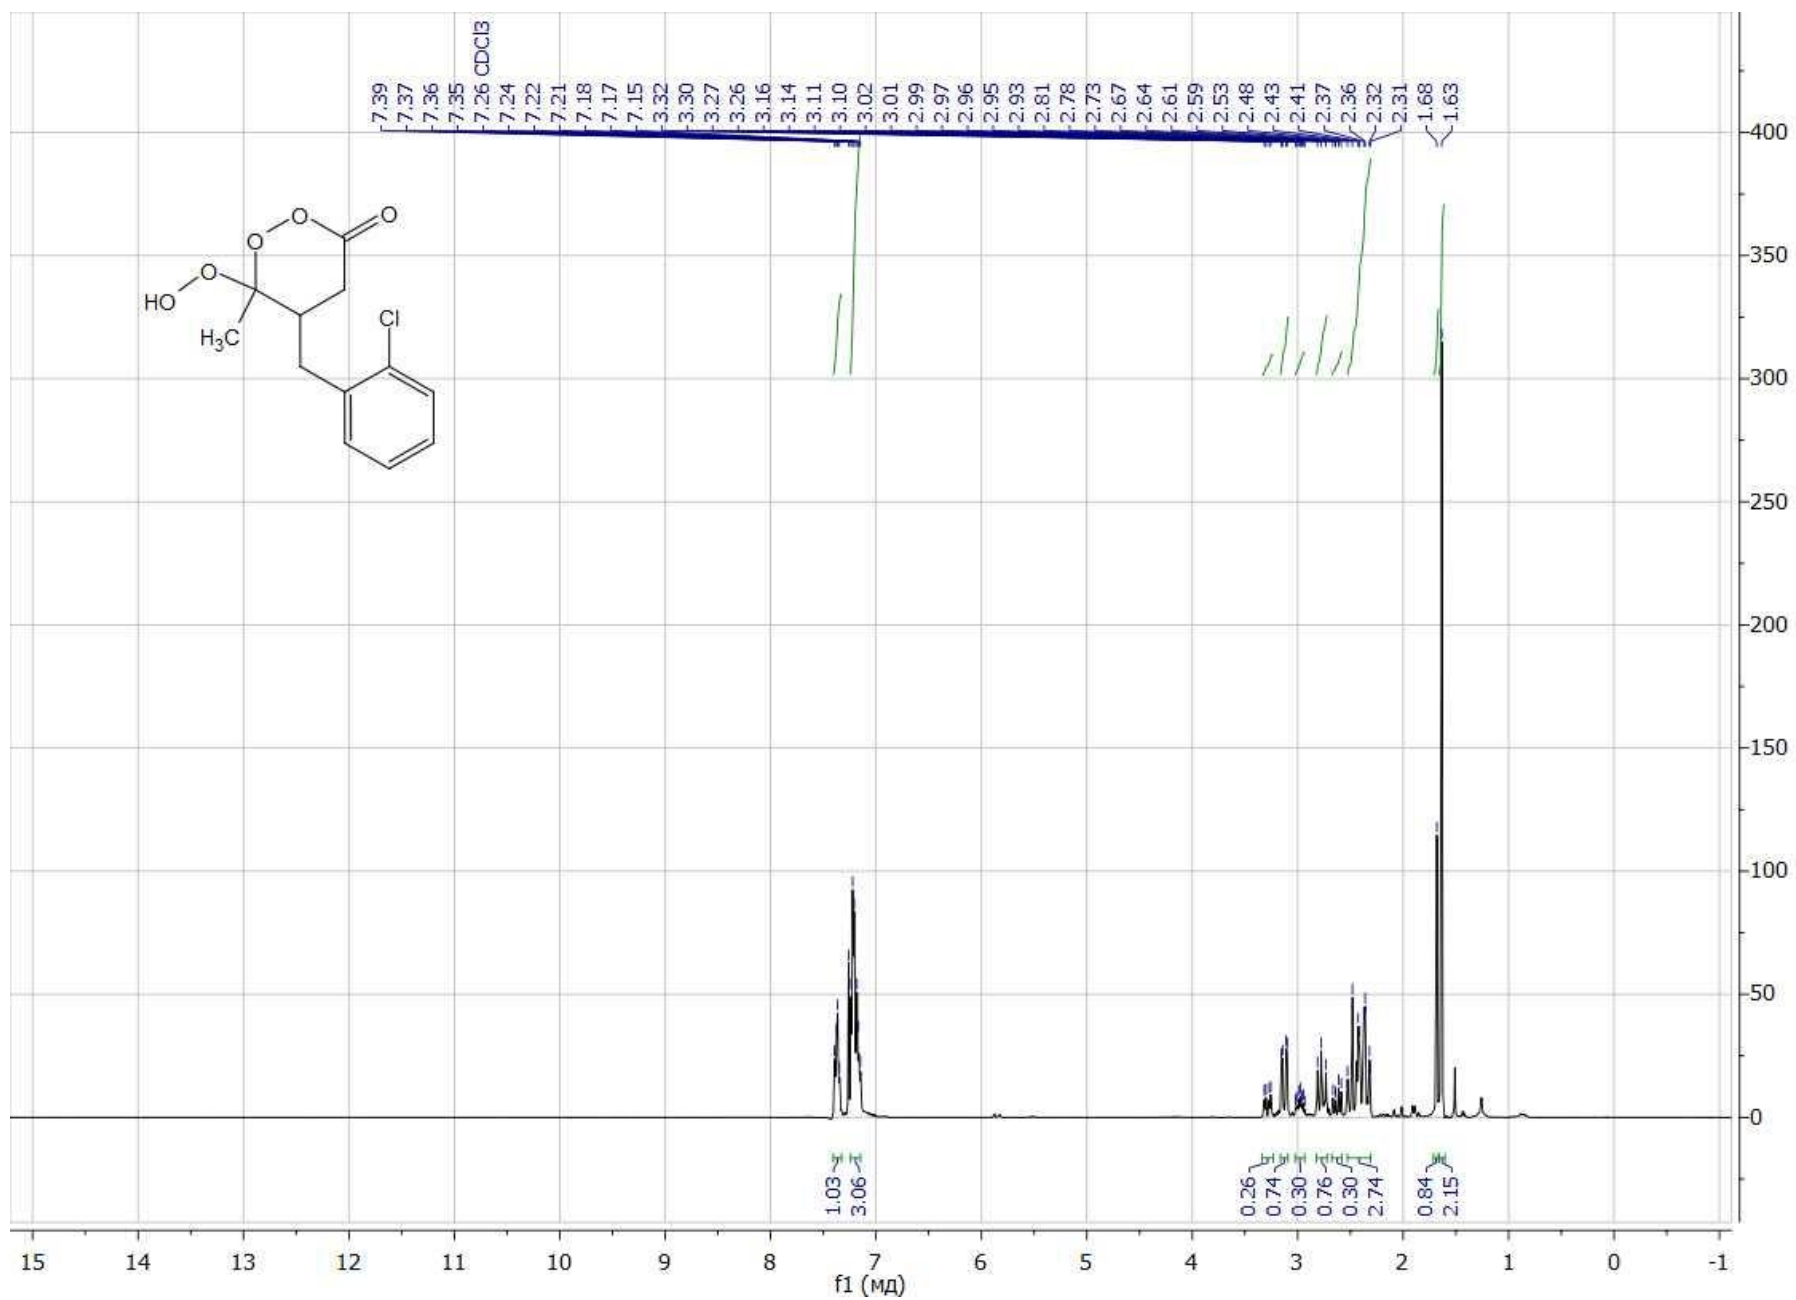

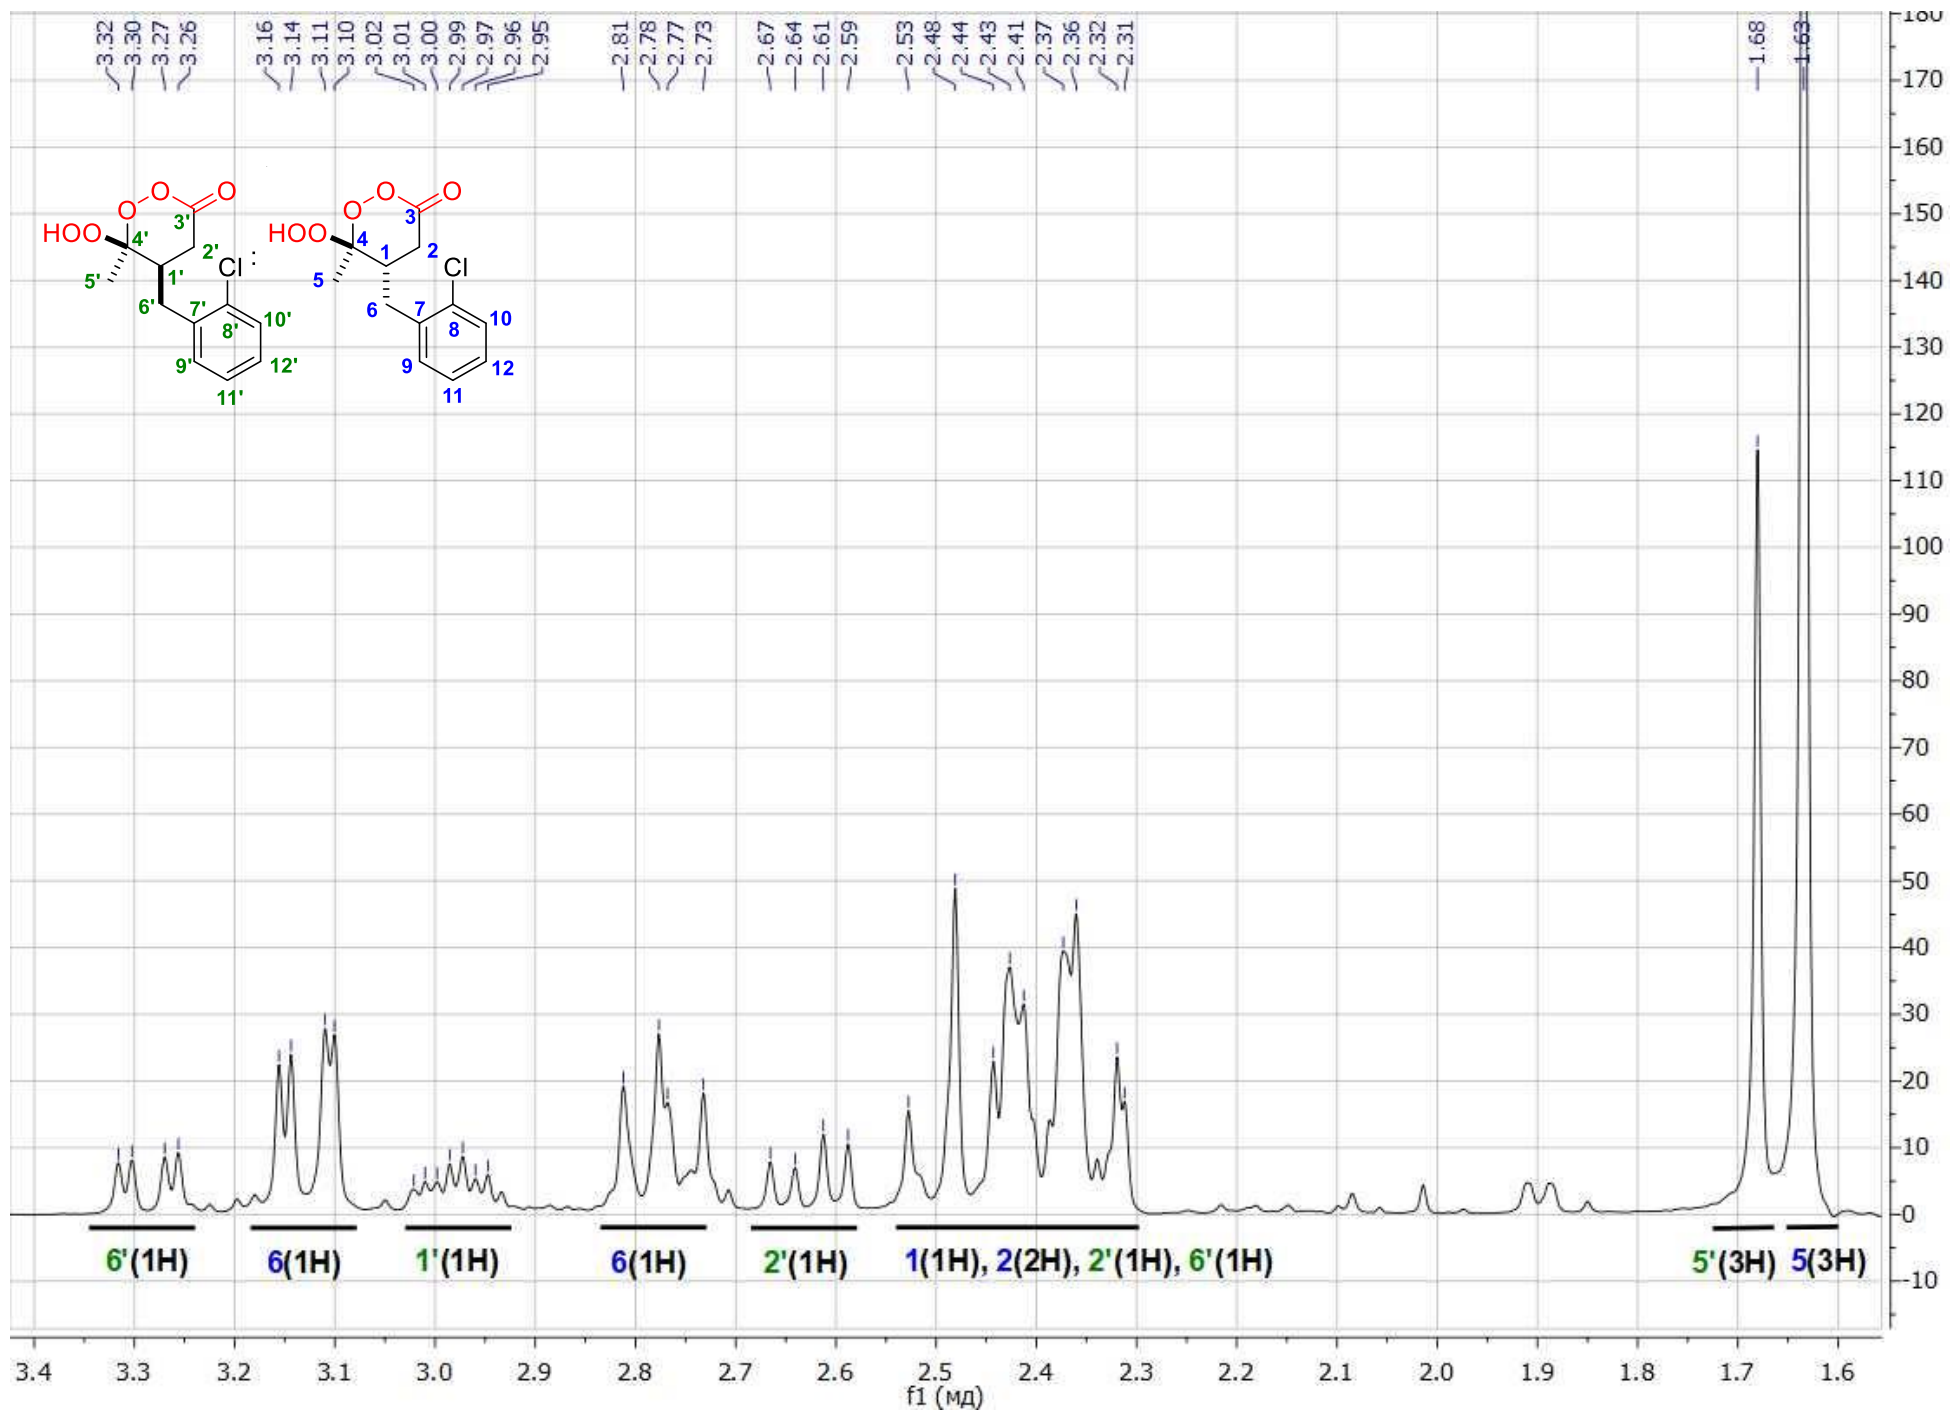

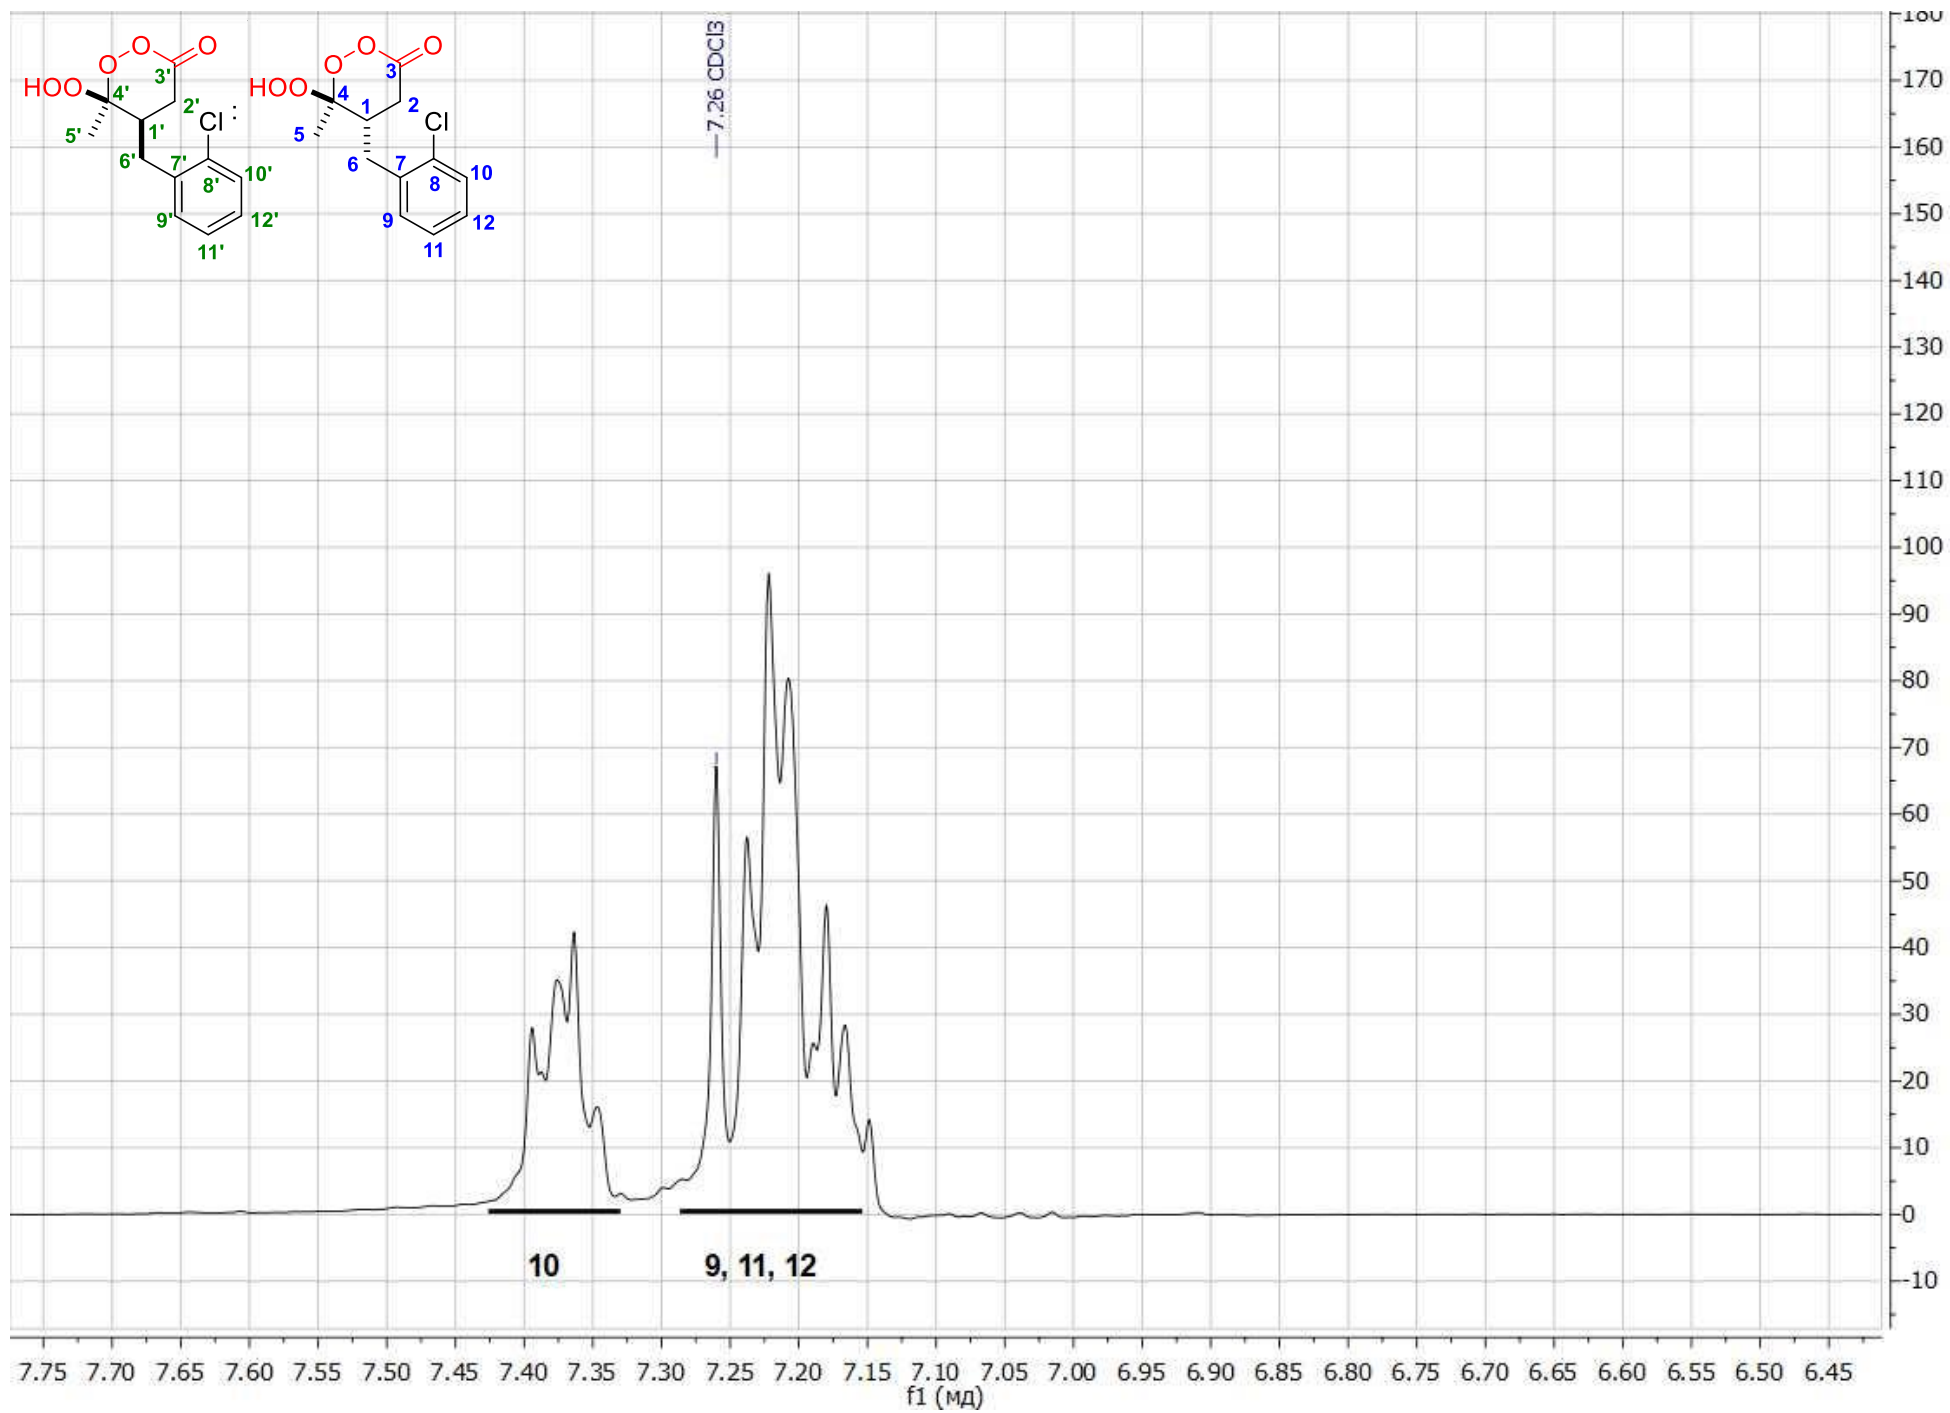

<sup>13</sup>C NMR

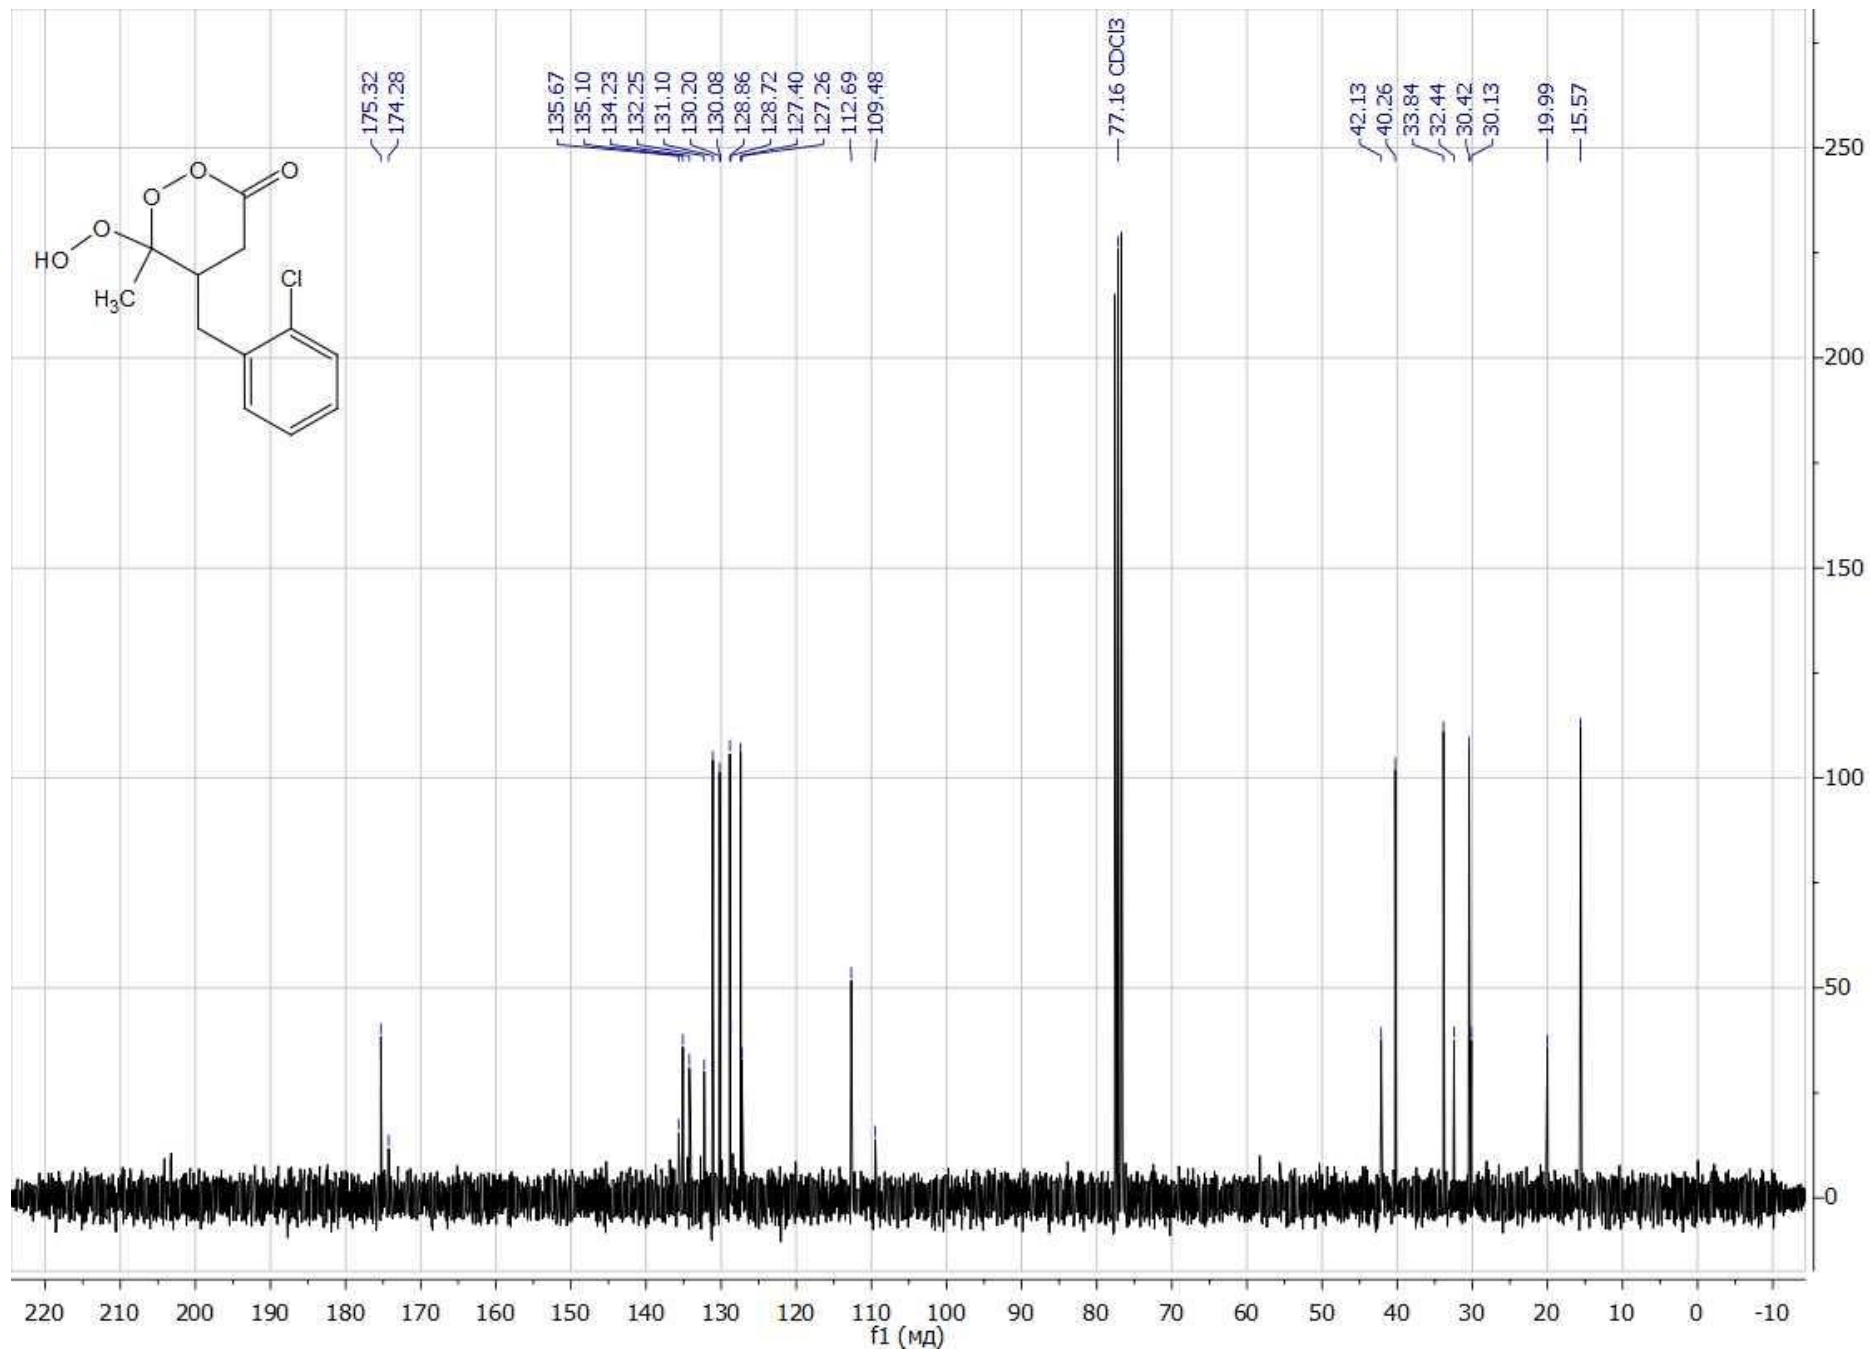

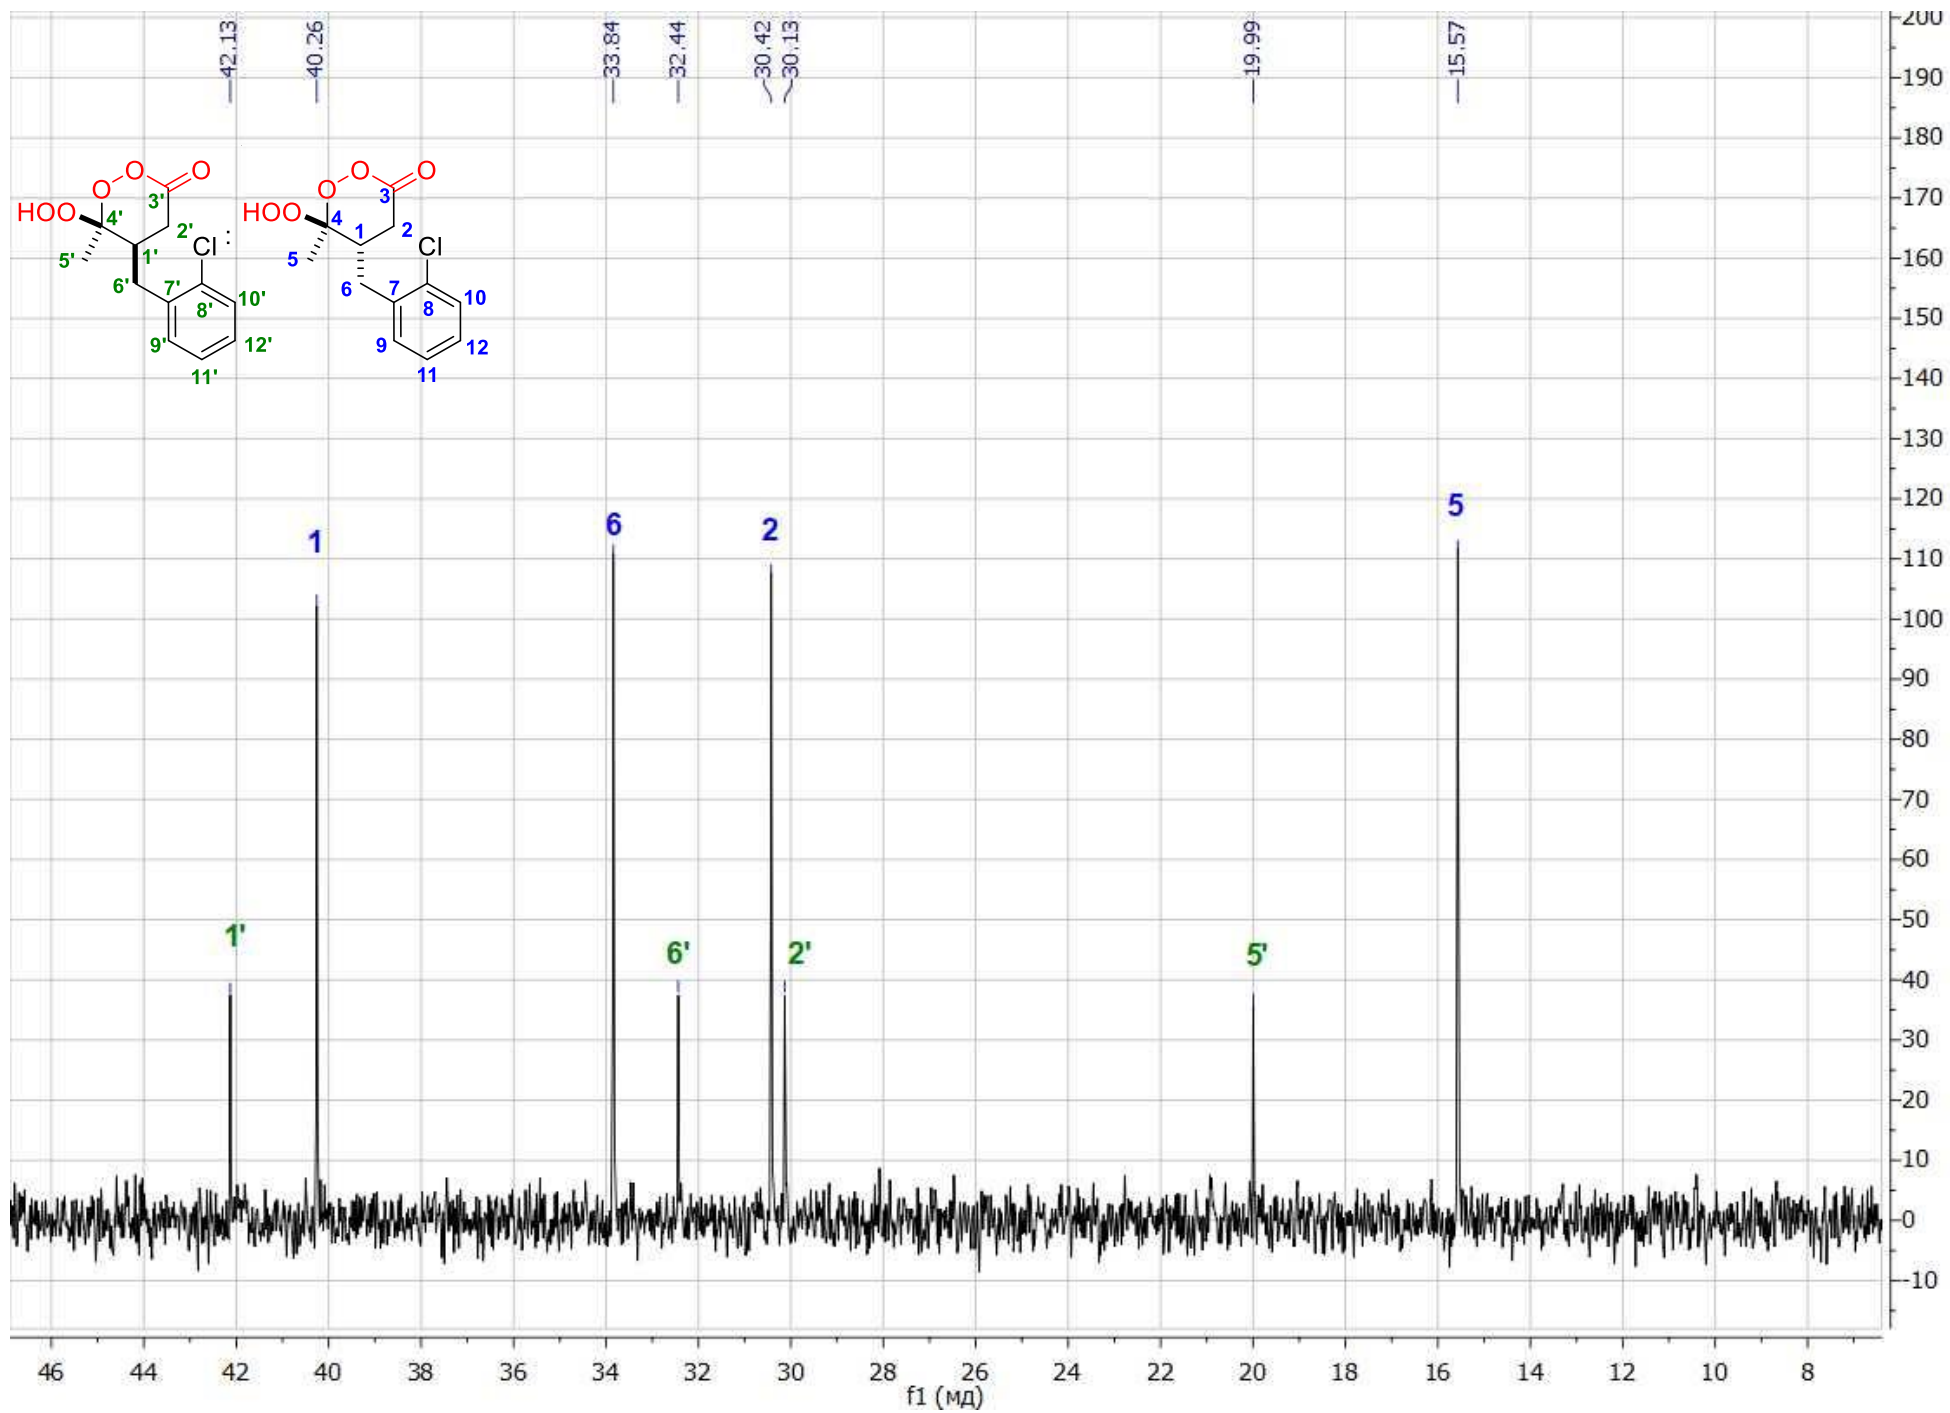

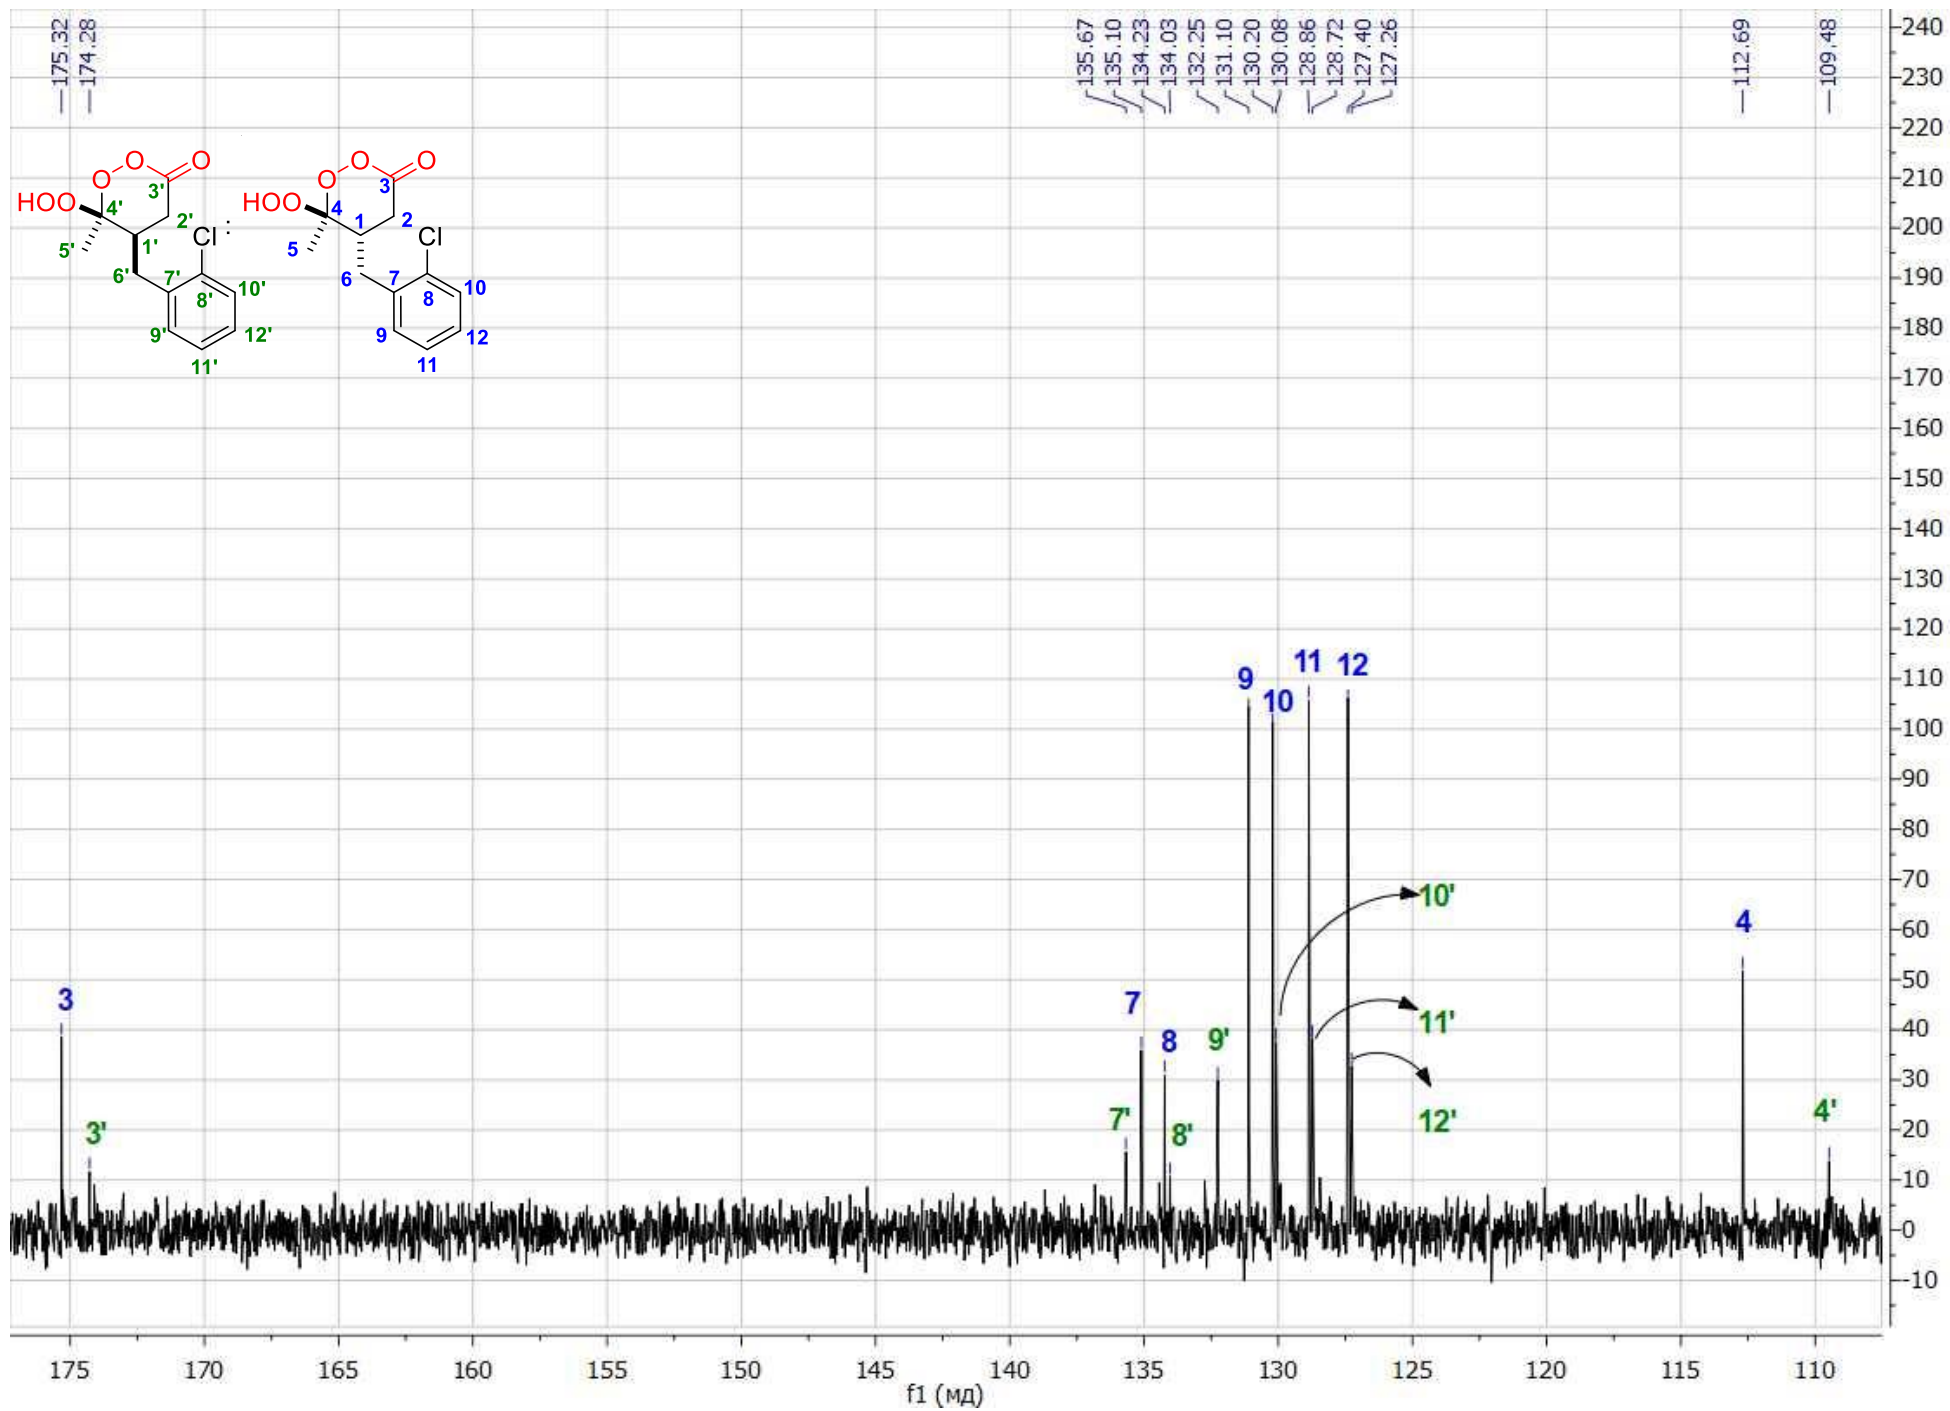



<sup>13</sup>C\_deptsp135

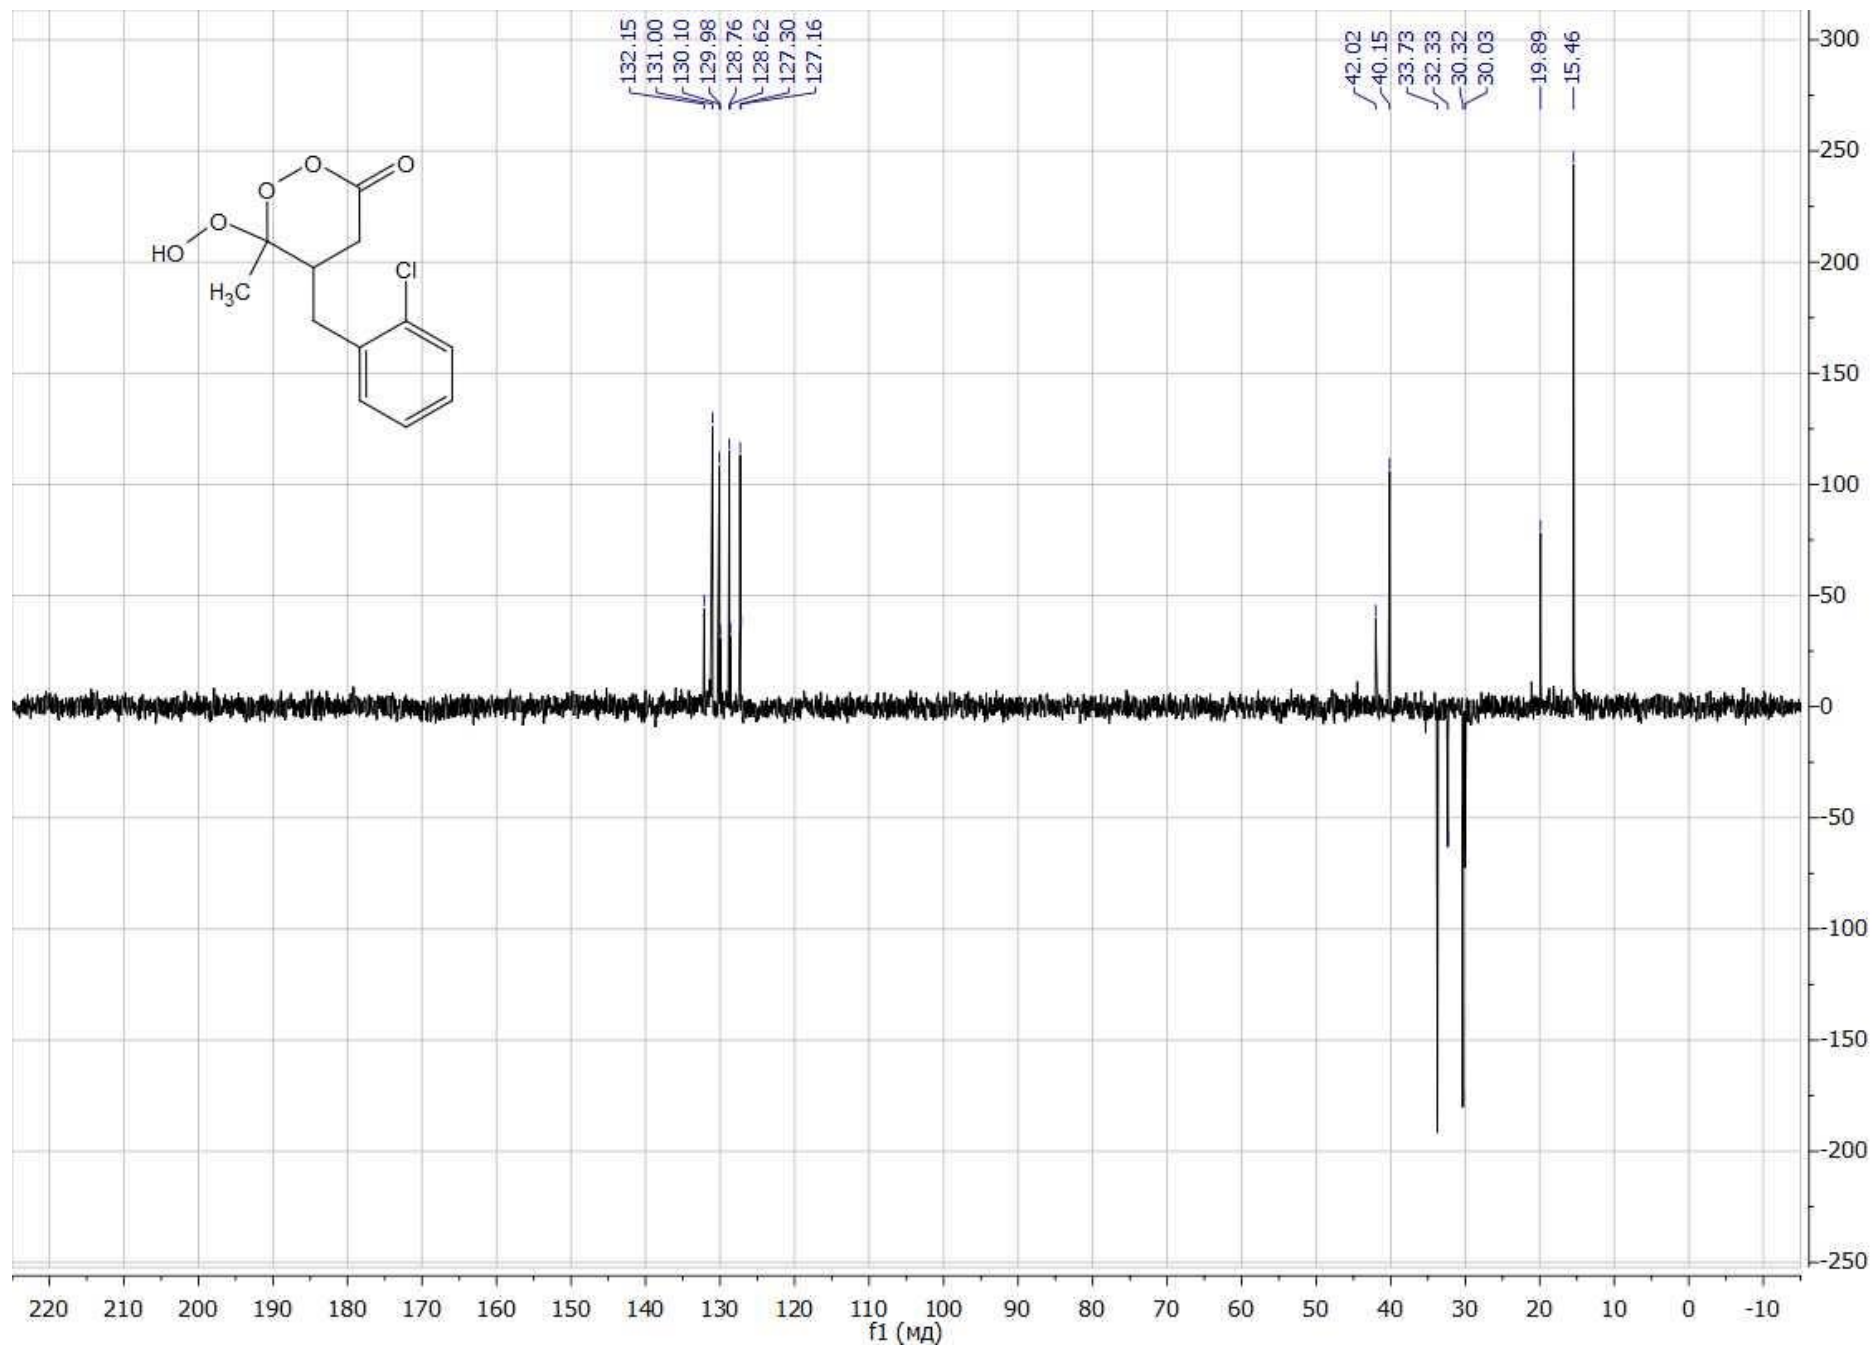

{<sup>1</sup>H-<sup>1</sup>H} COSY

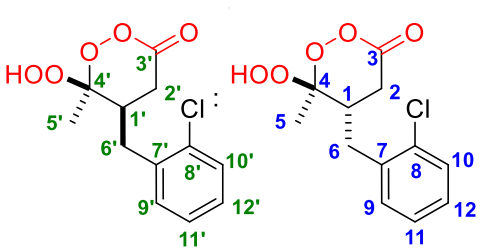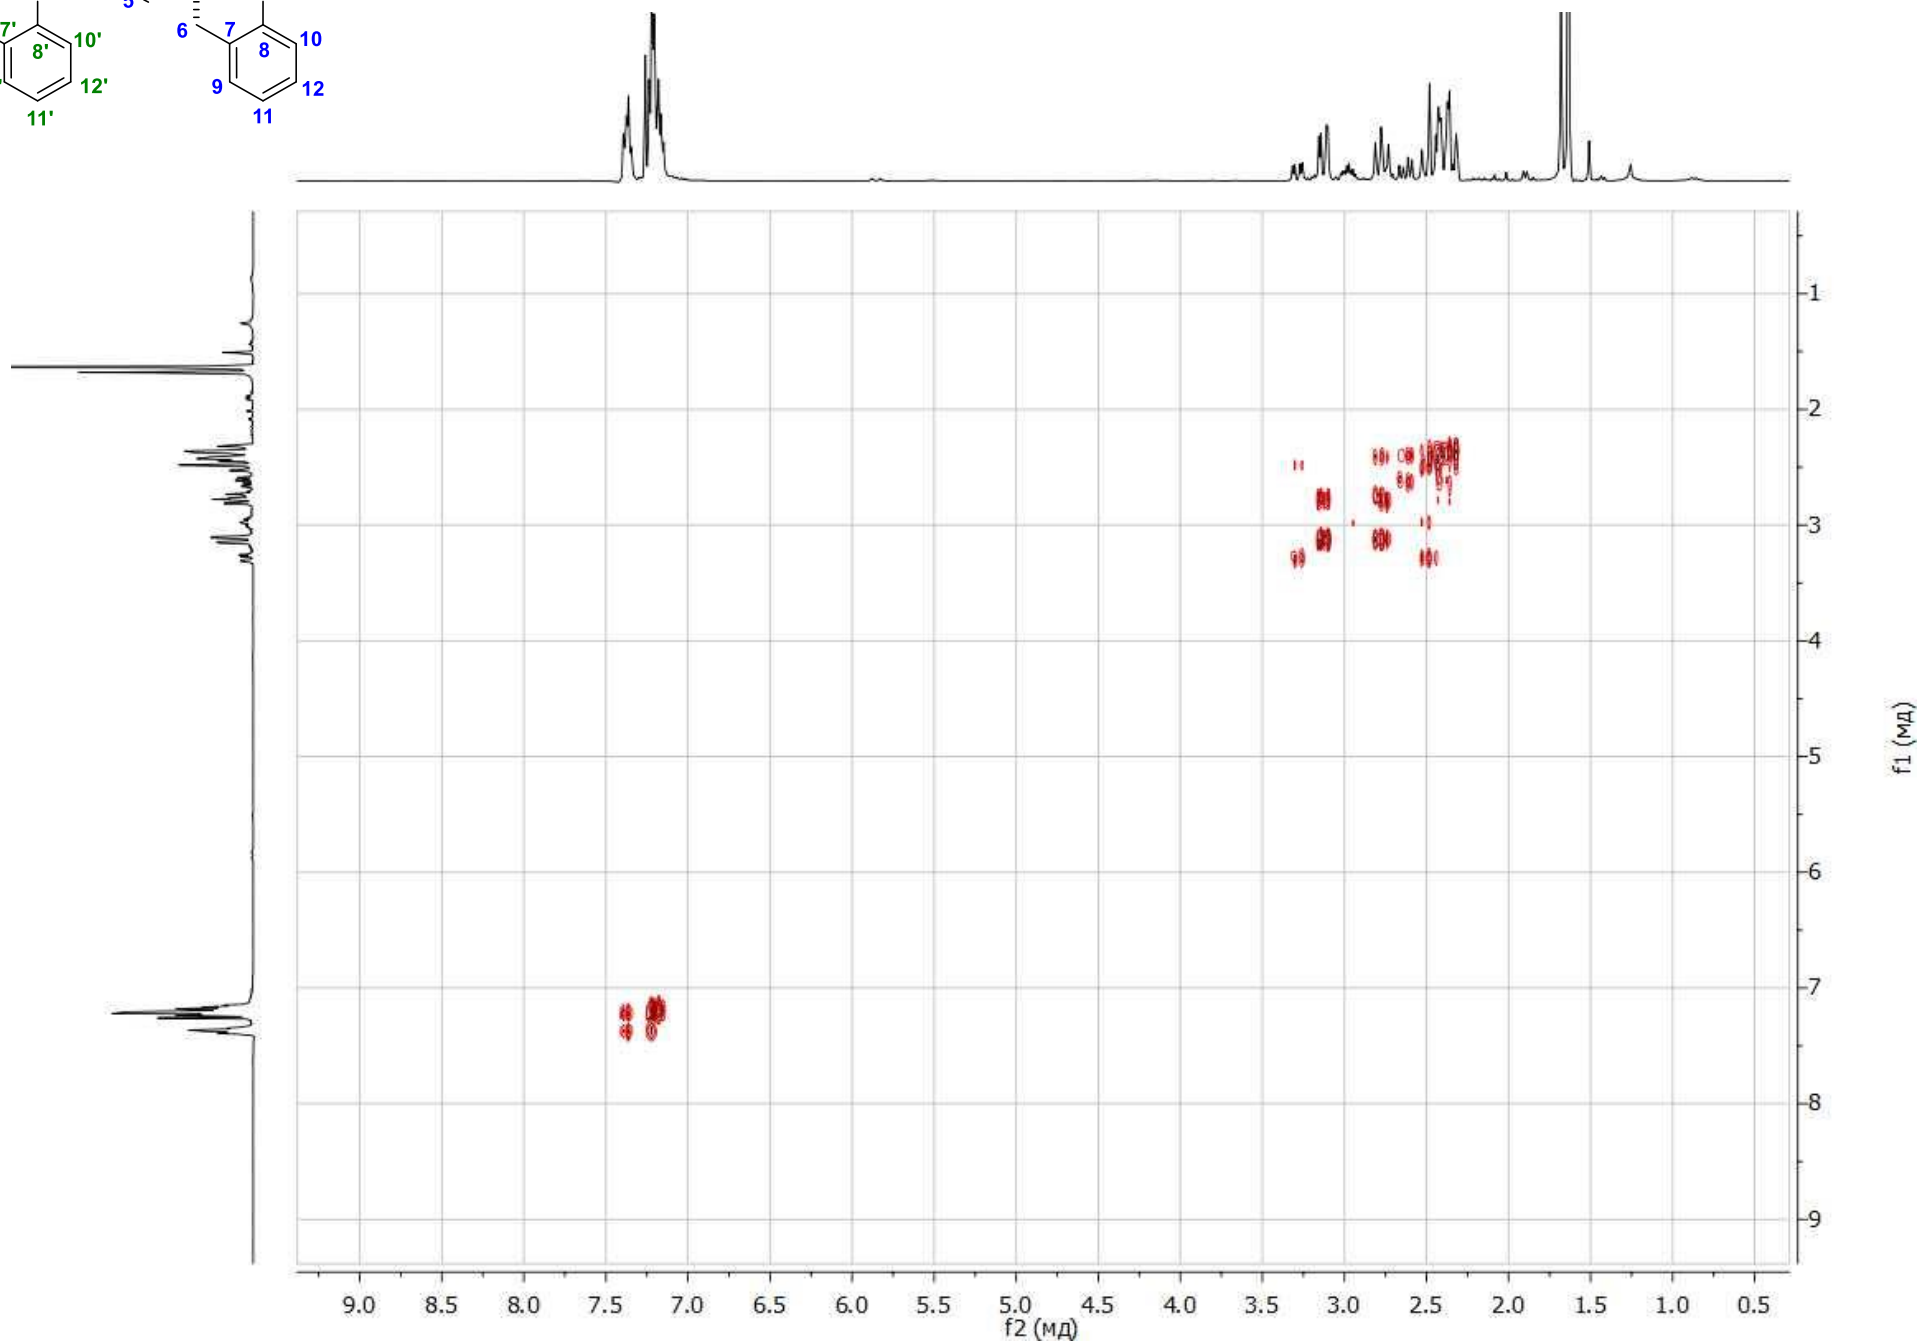

{<sup>1</sup>H-<sup>1</sup>H} NOESY

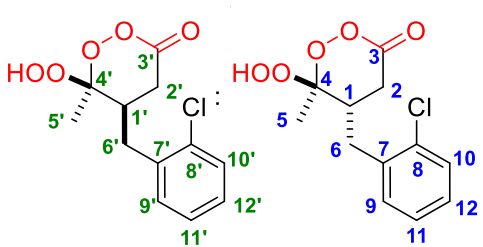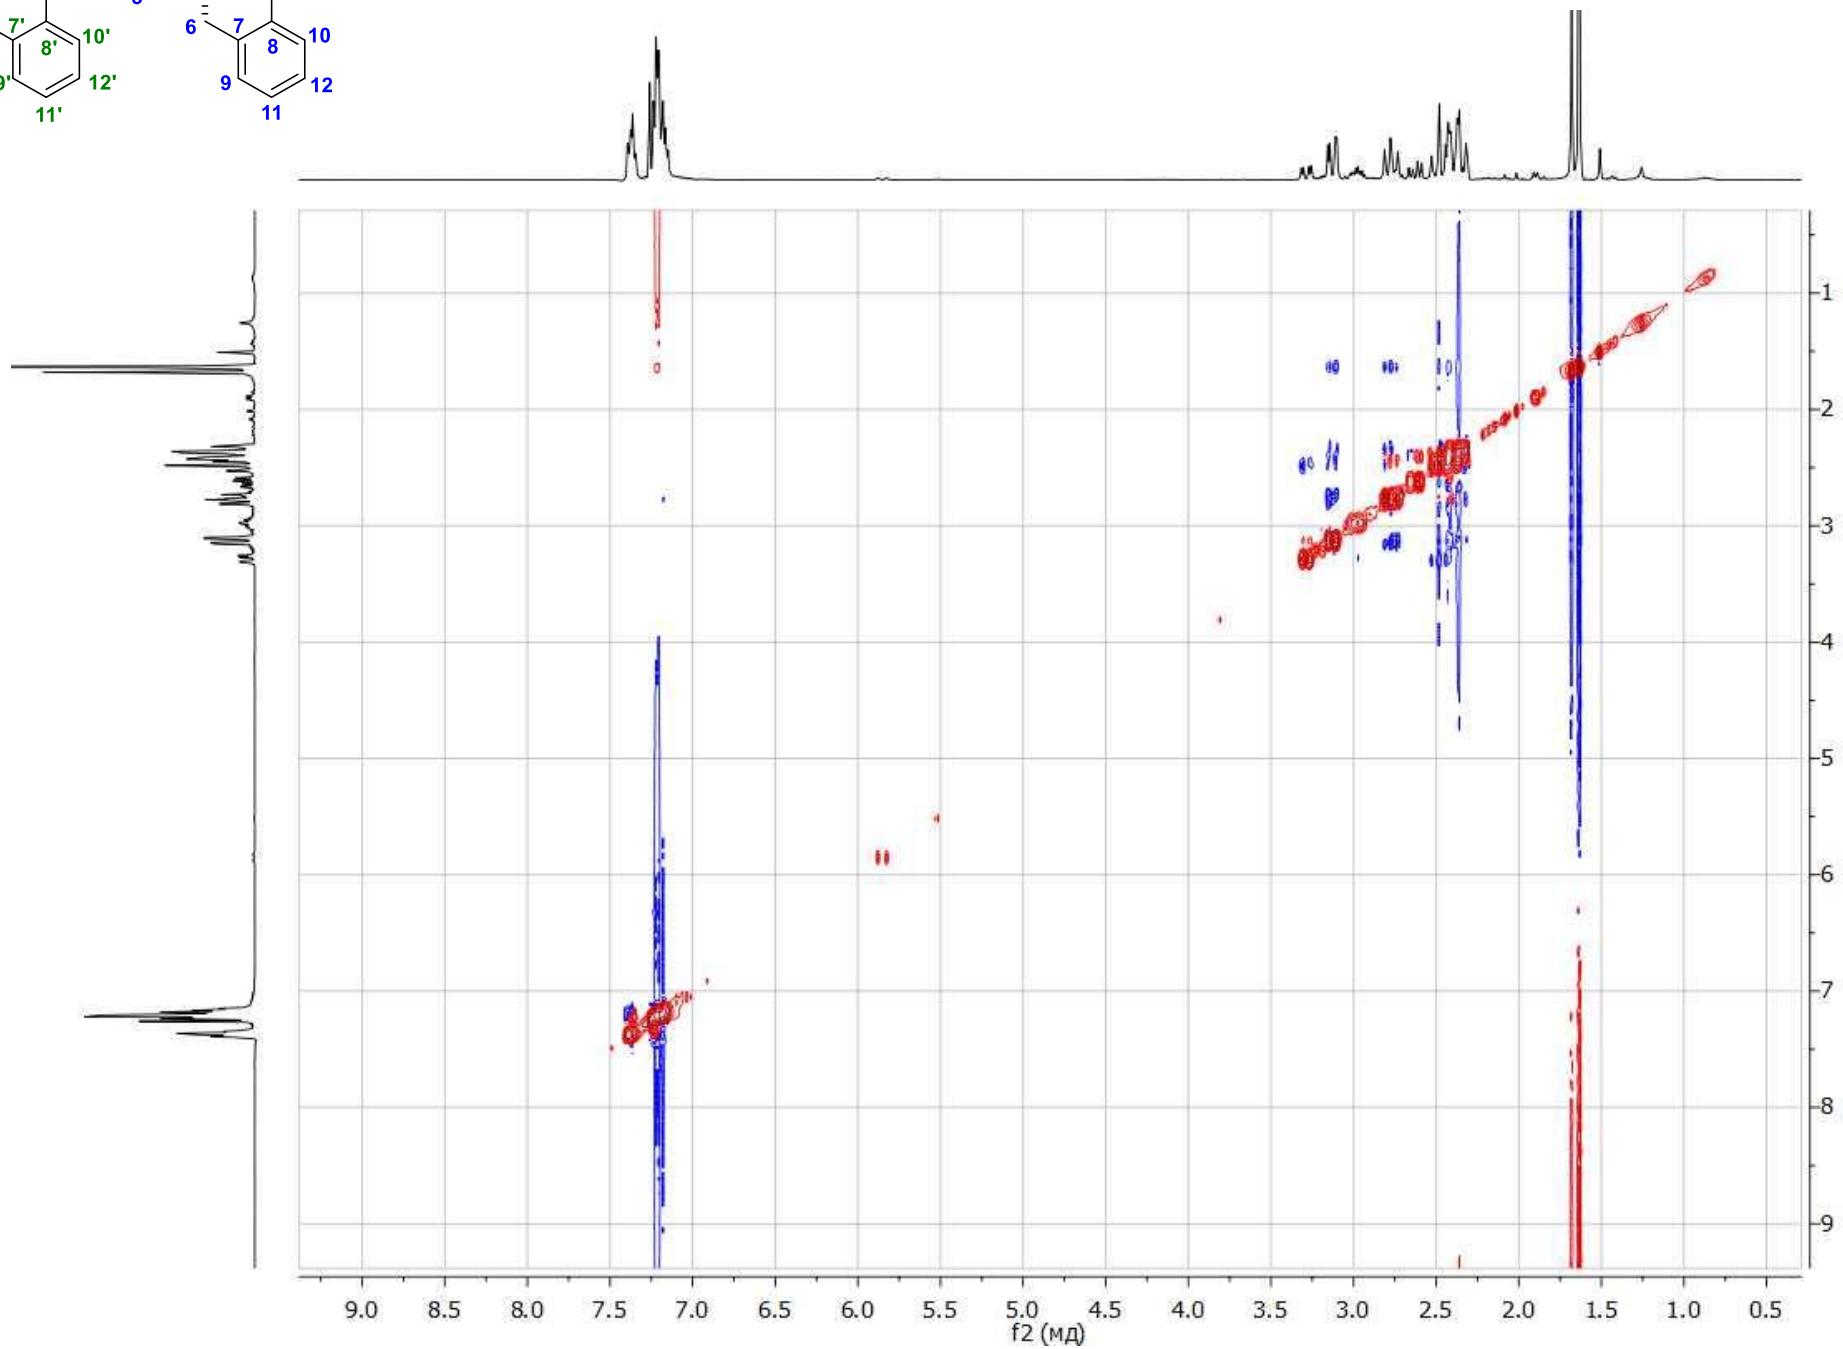

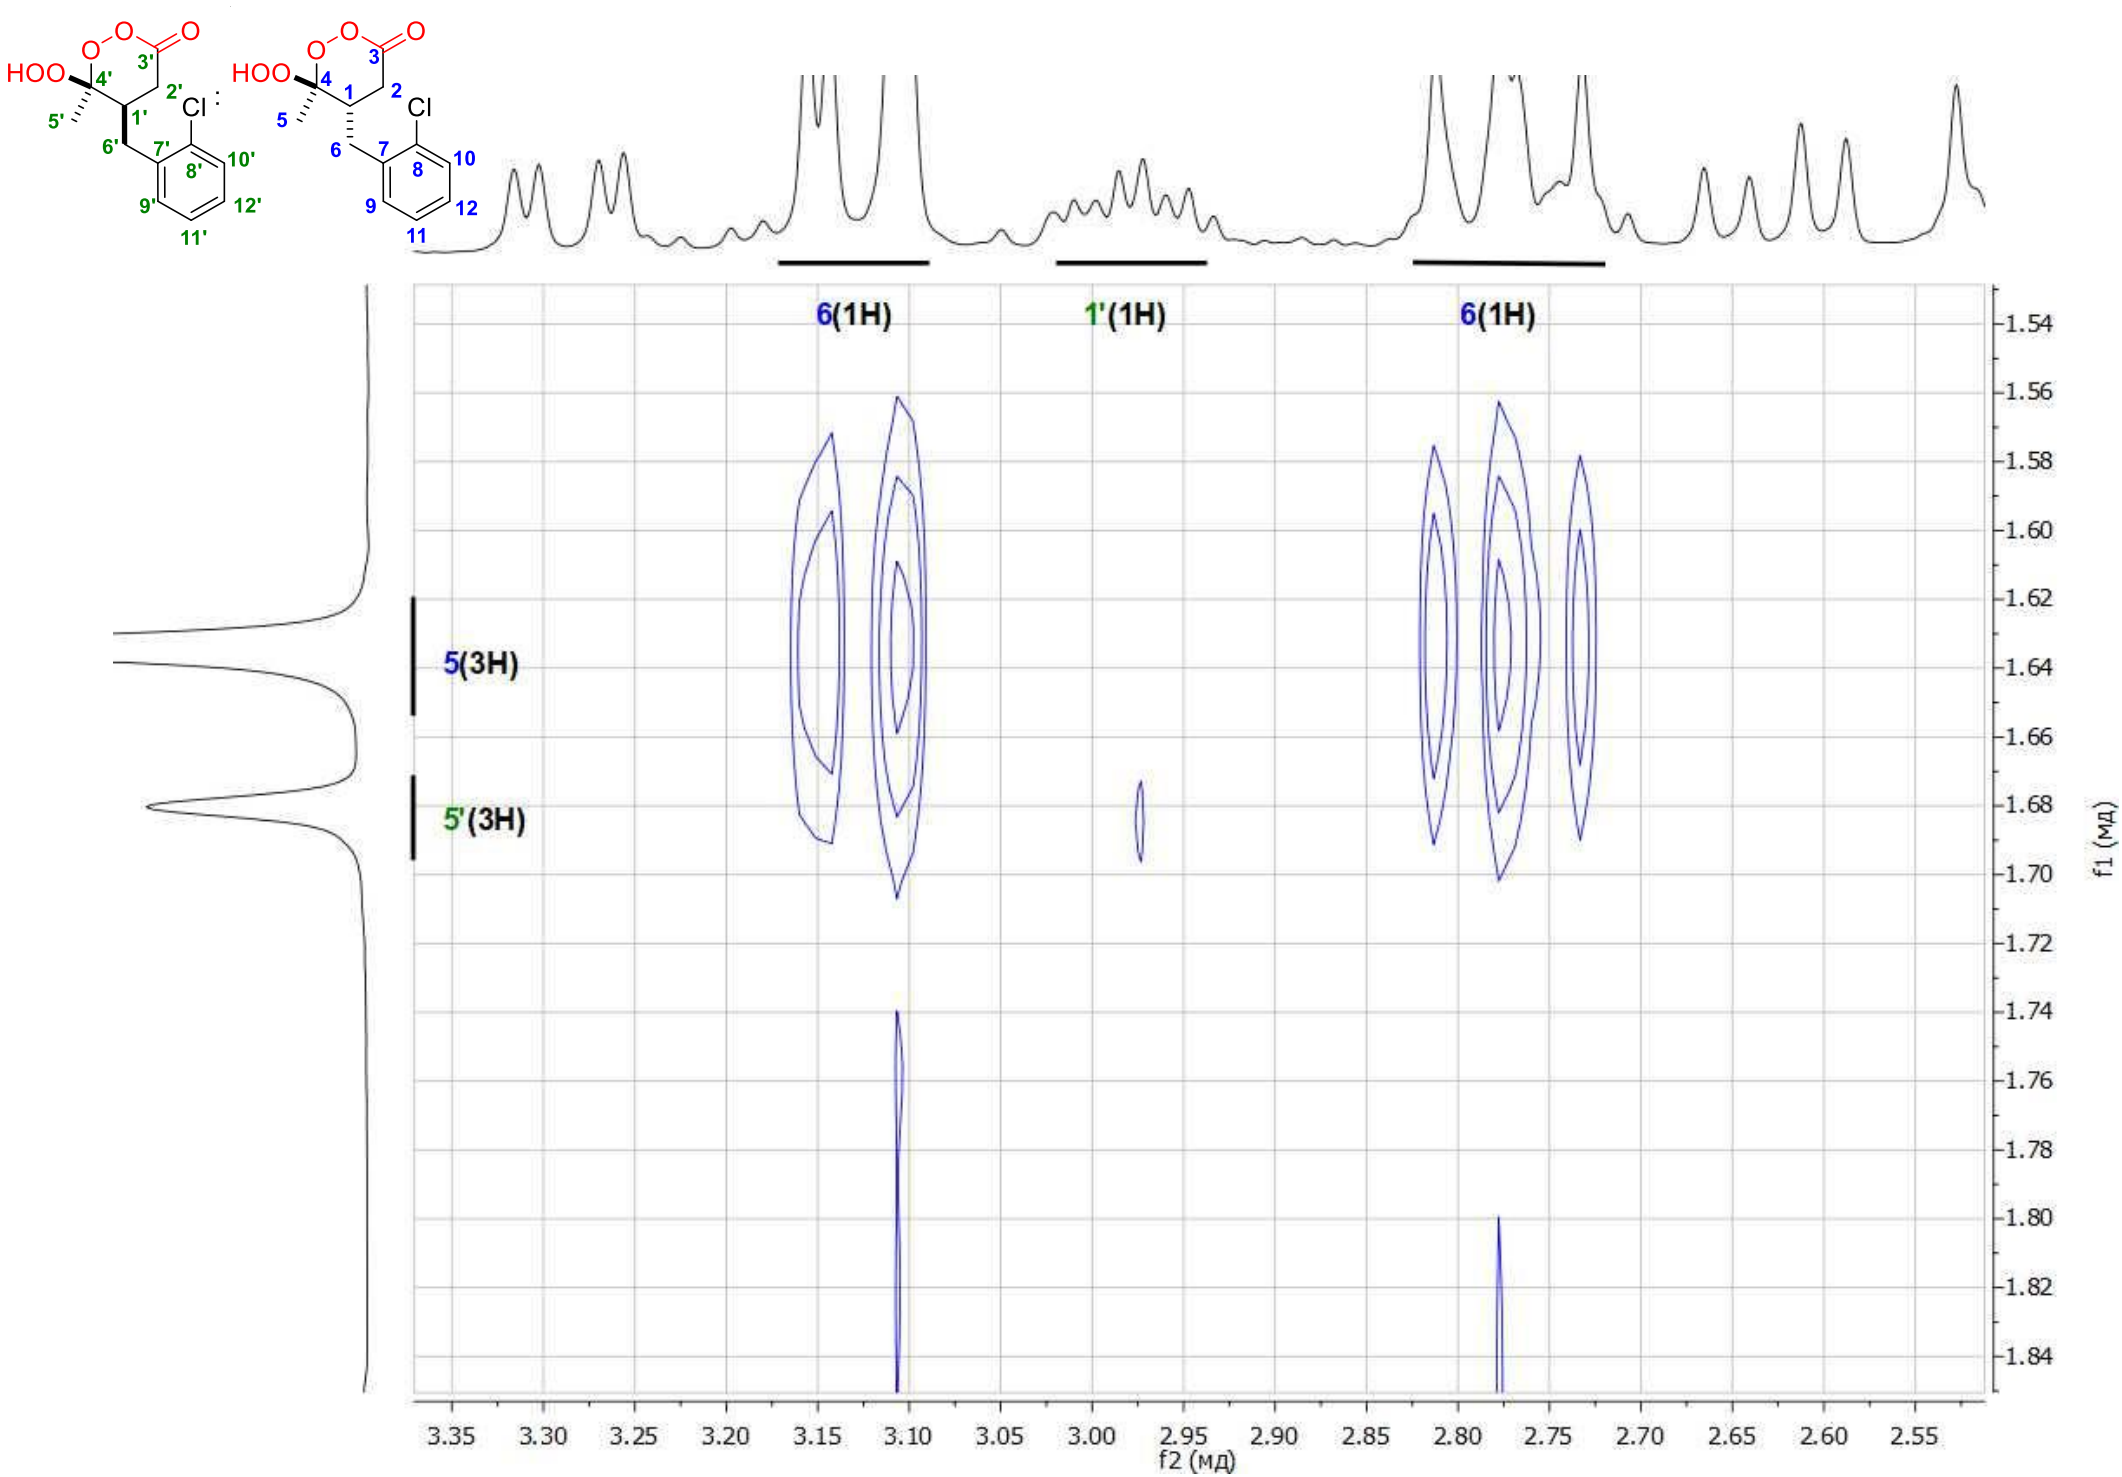

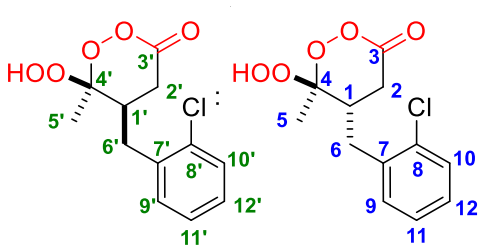

{<sup>1</sup>H-<sup>13</sup>C} HSQC

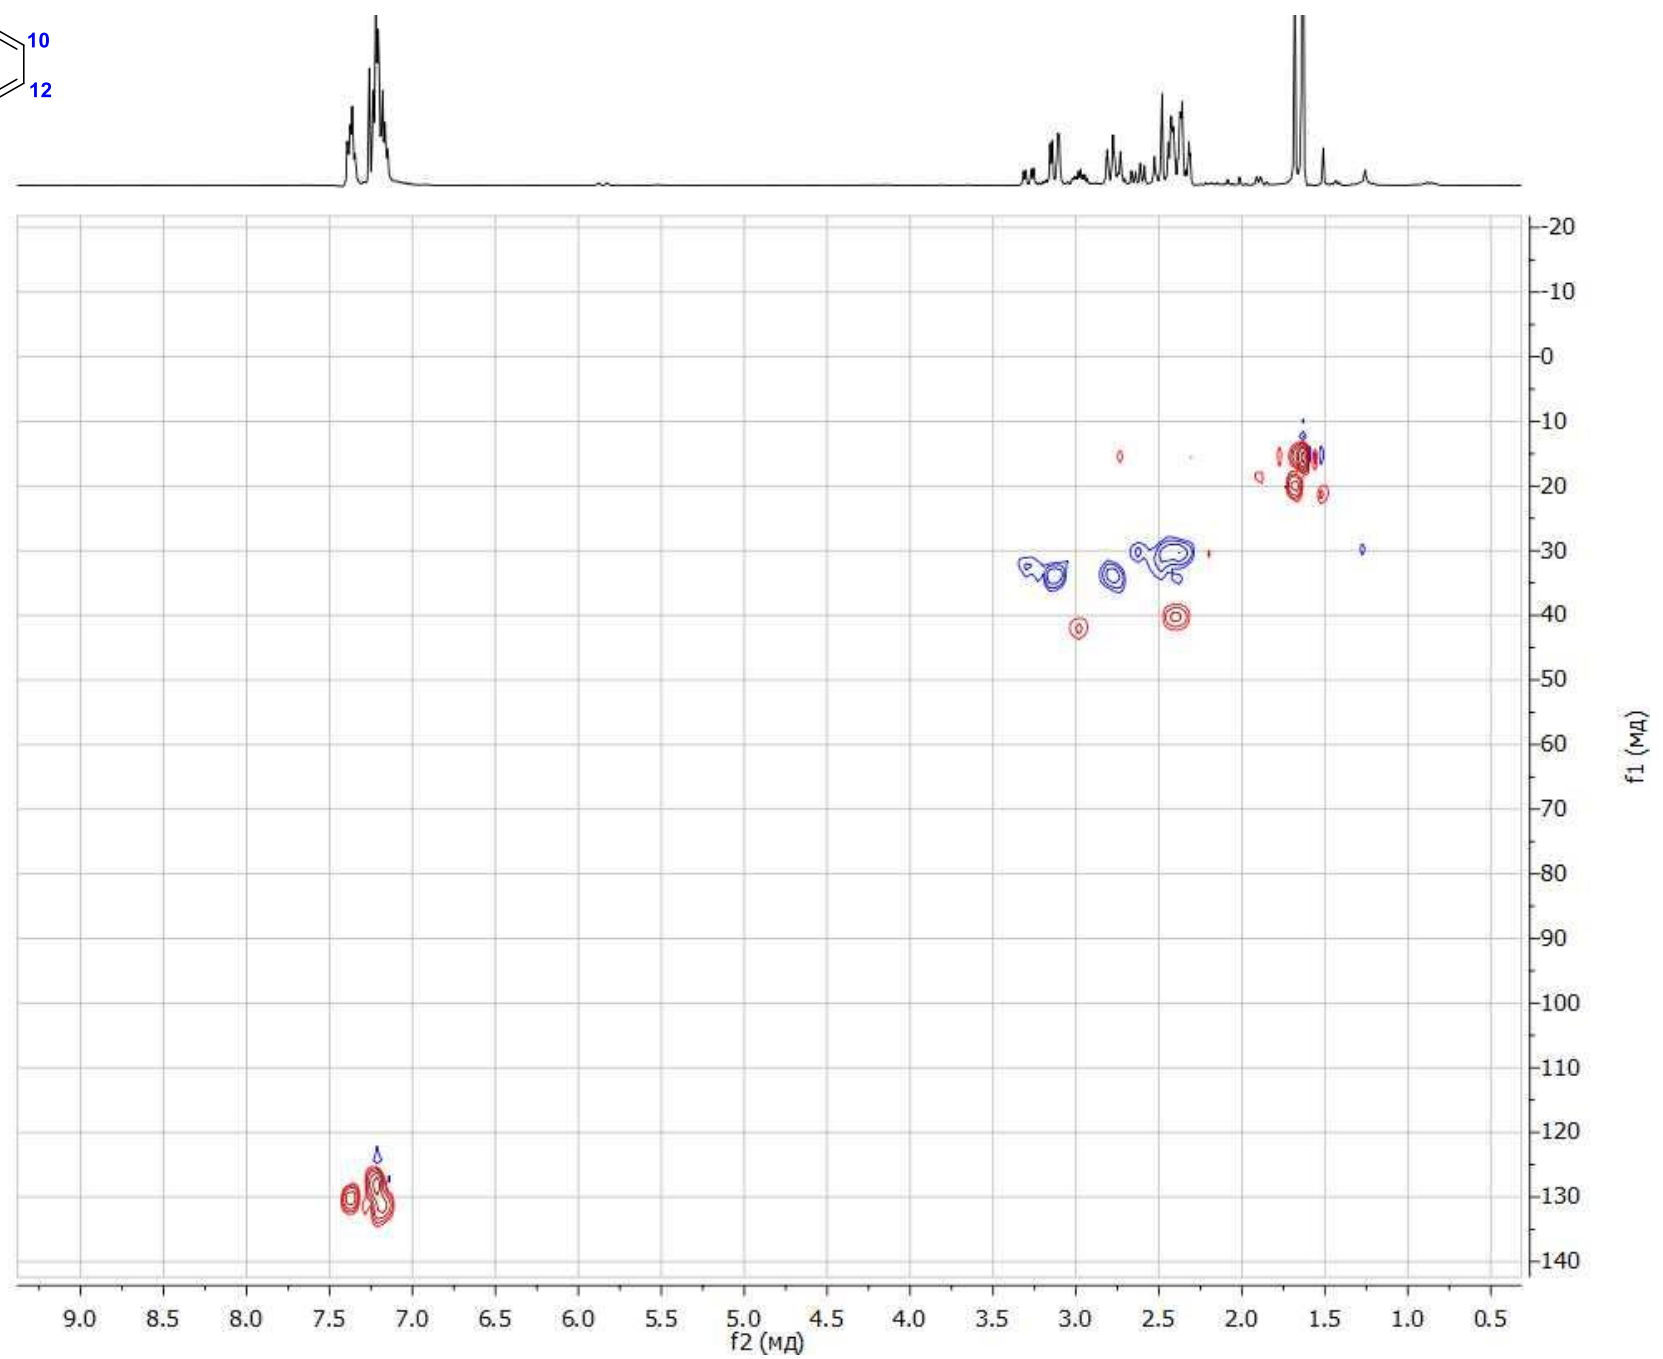

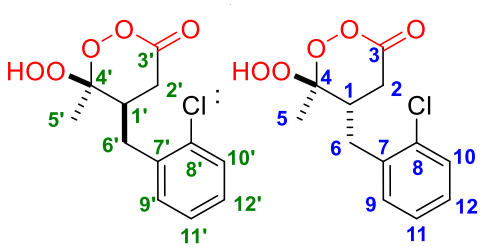

{<sup>1</sup>H-<sup>13</sup>C} HMBC

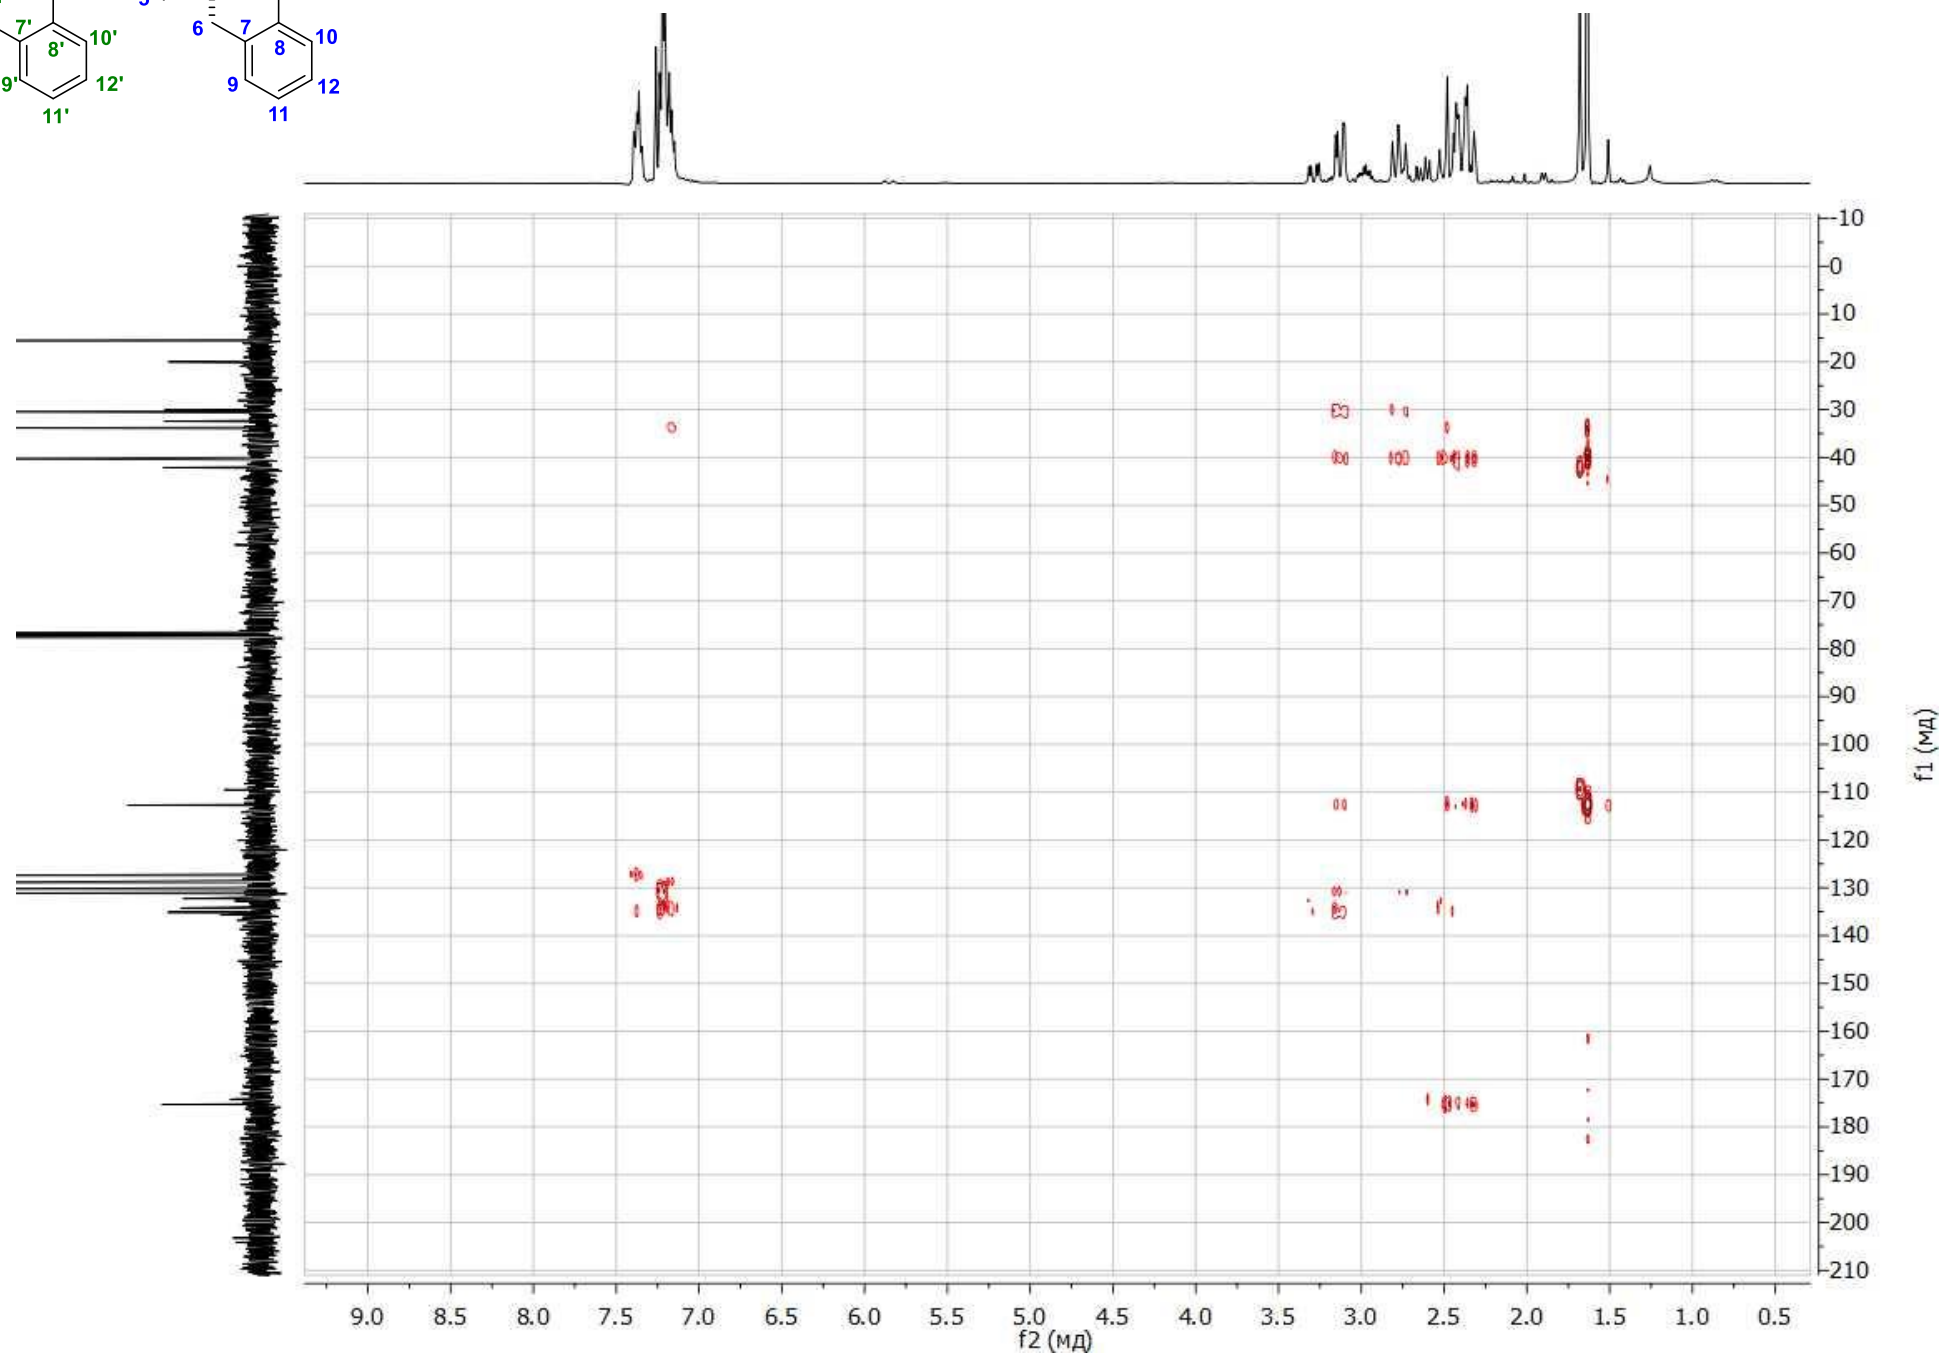

# 5-Butyl-6-hydroperoxy-6-methyl-1,2-dioxan-3-one, 2j

## <sup>1</sup>H NMR

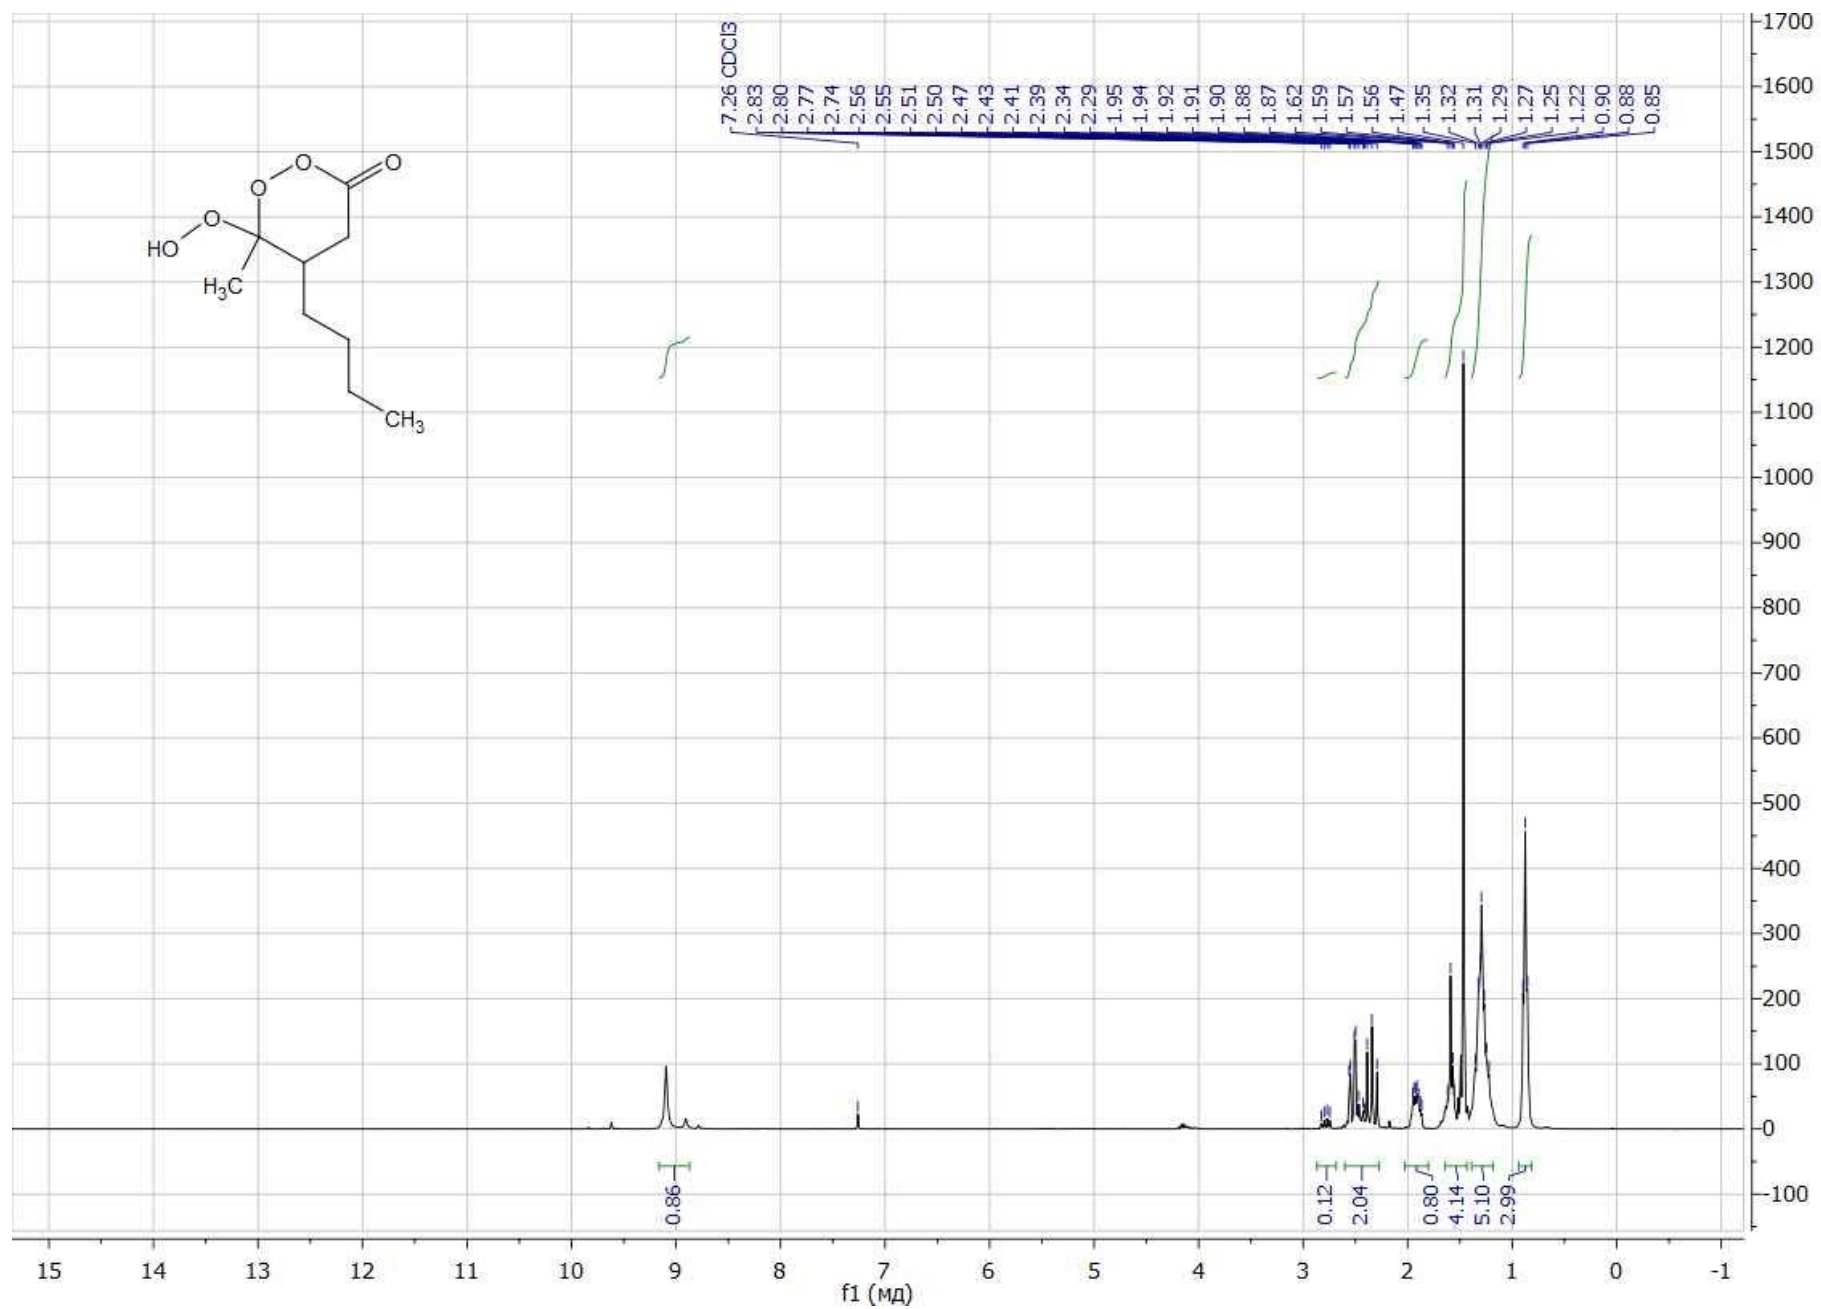

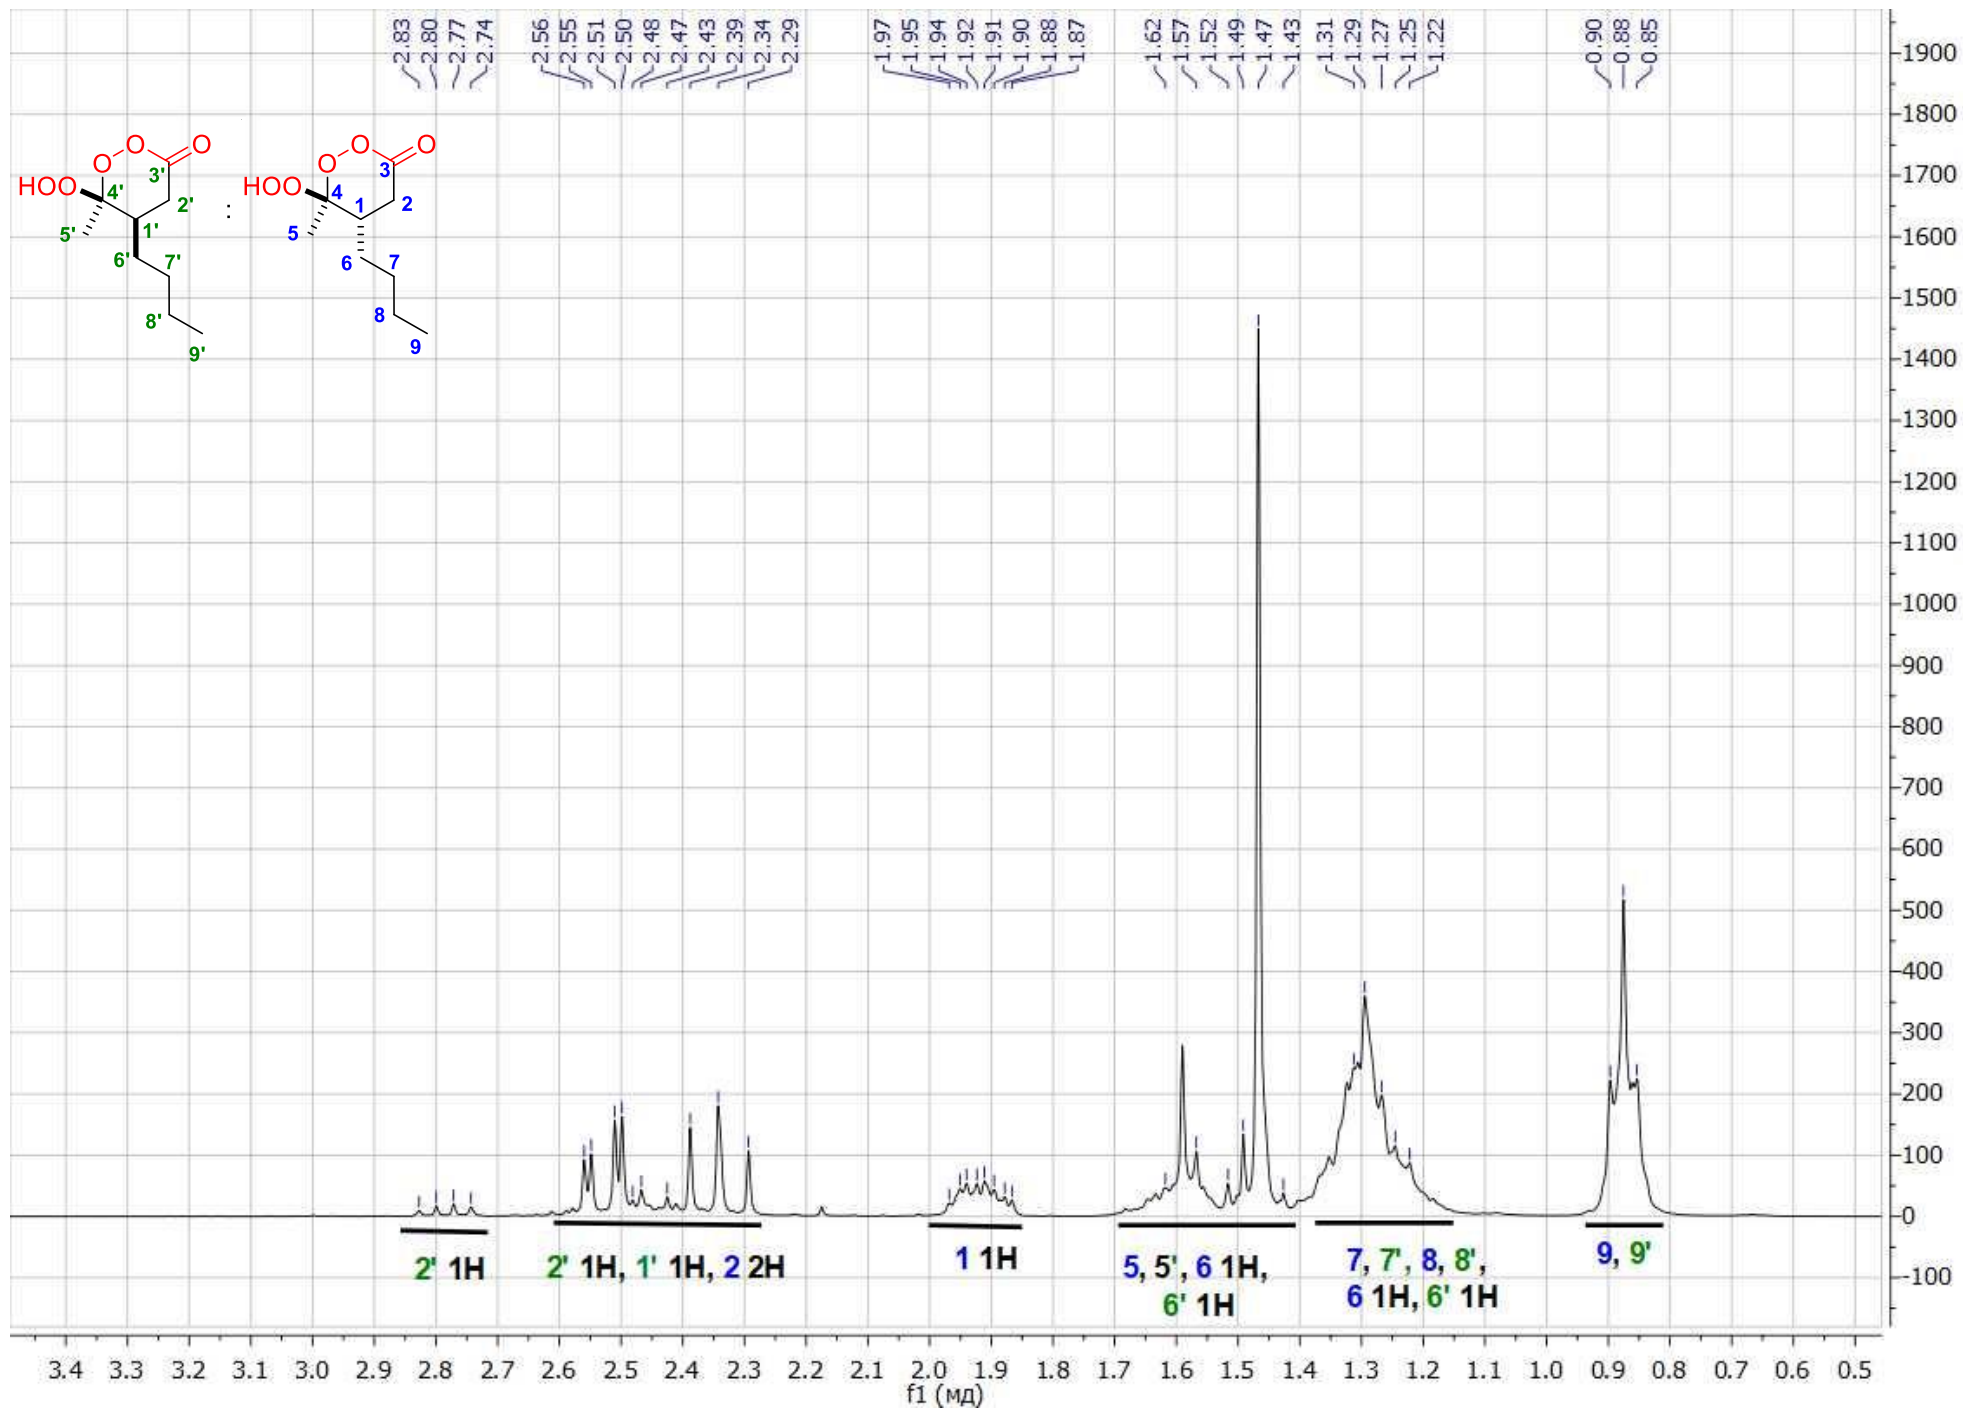



<sup>13</sup>C NMR

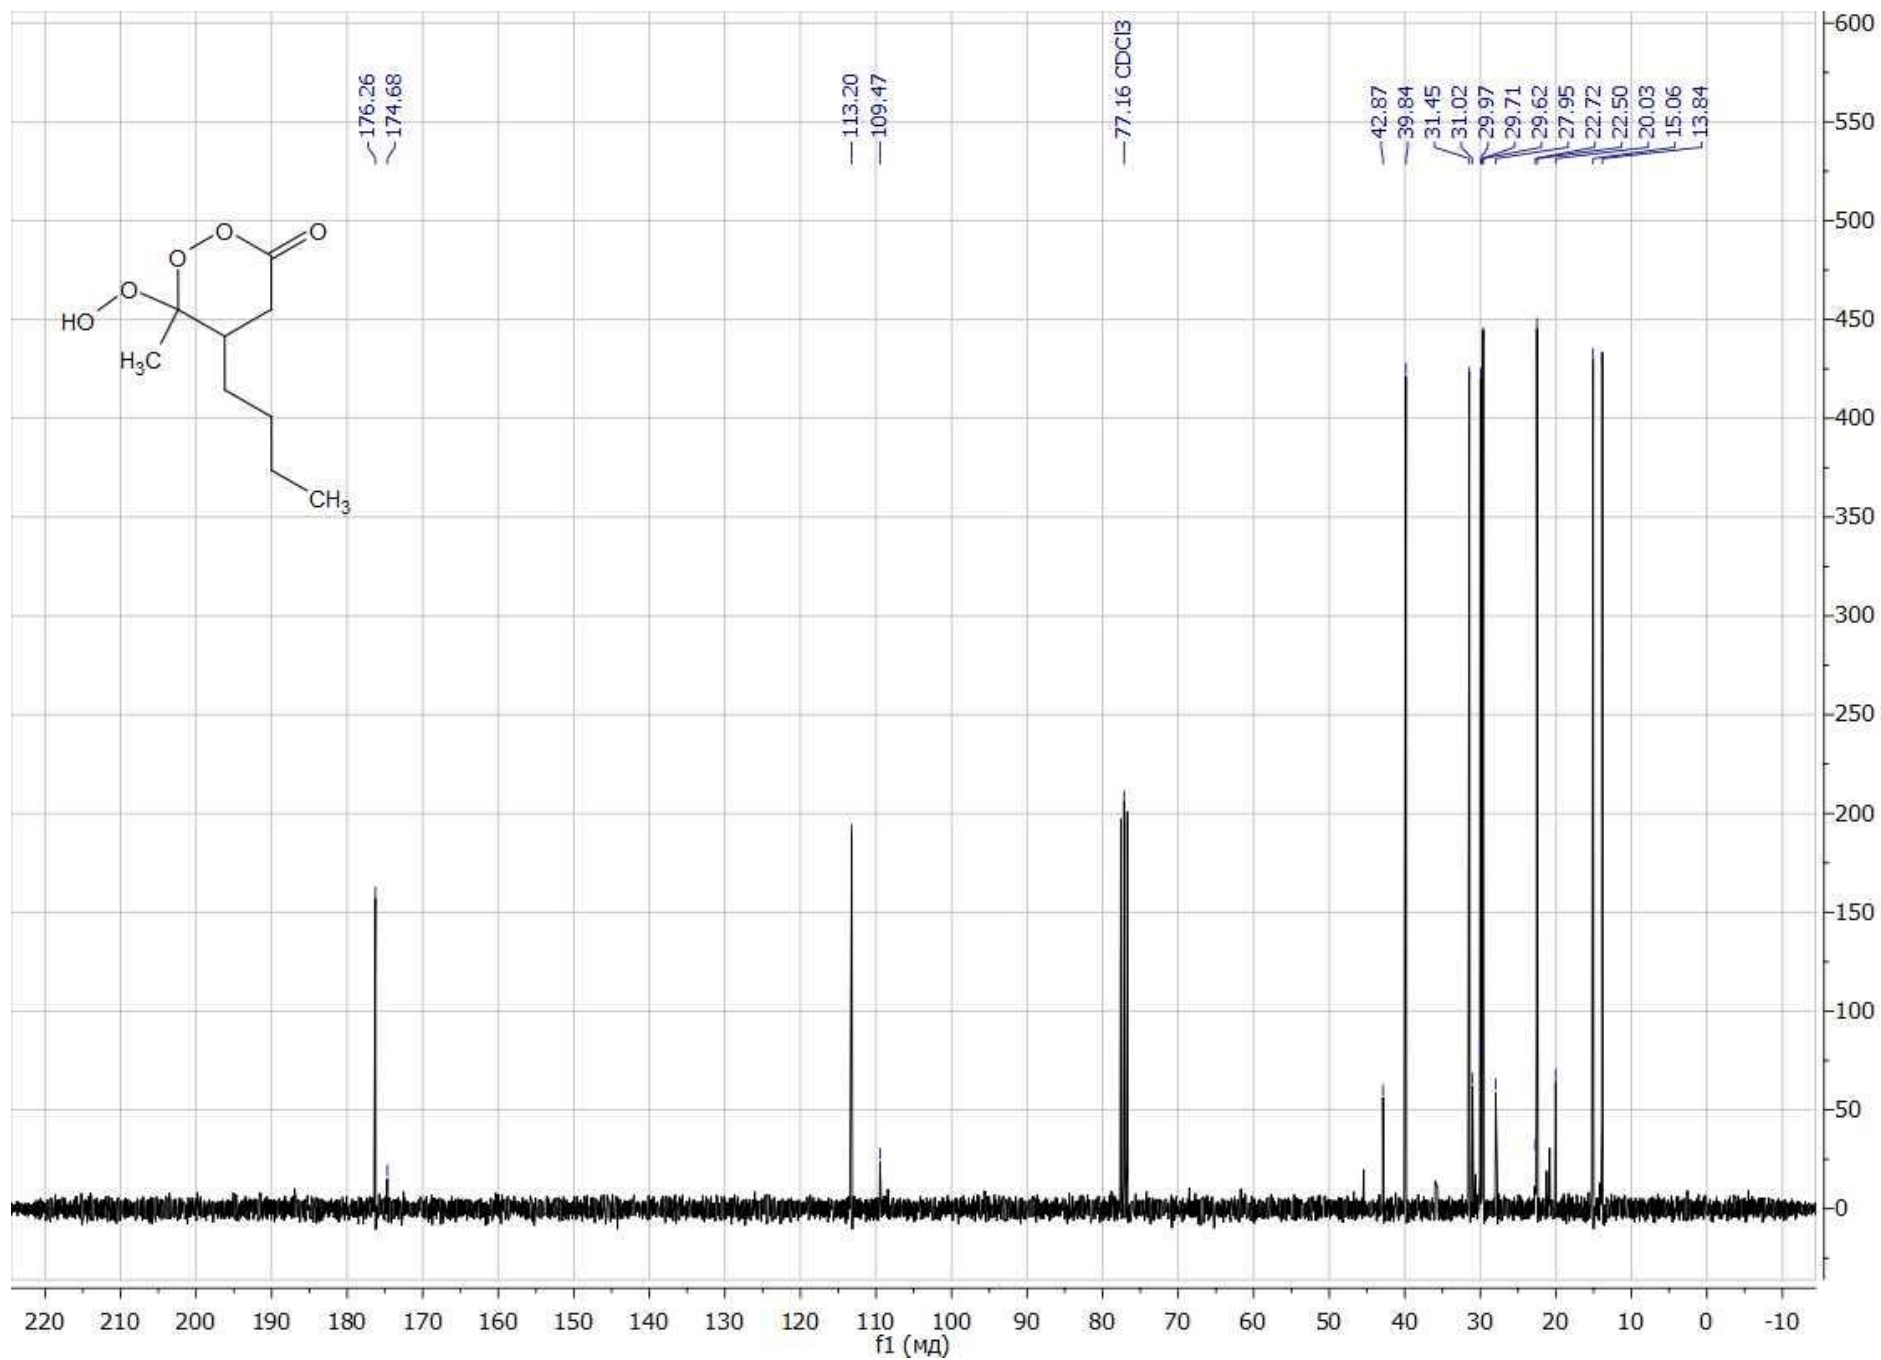

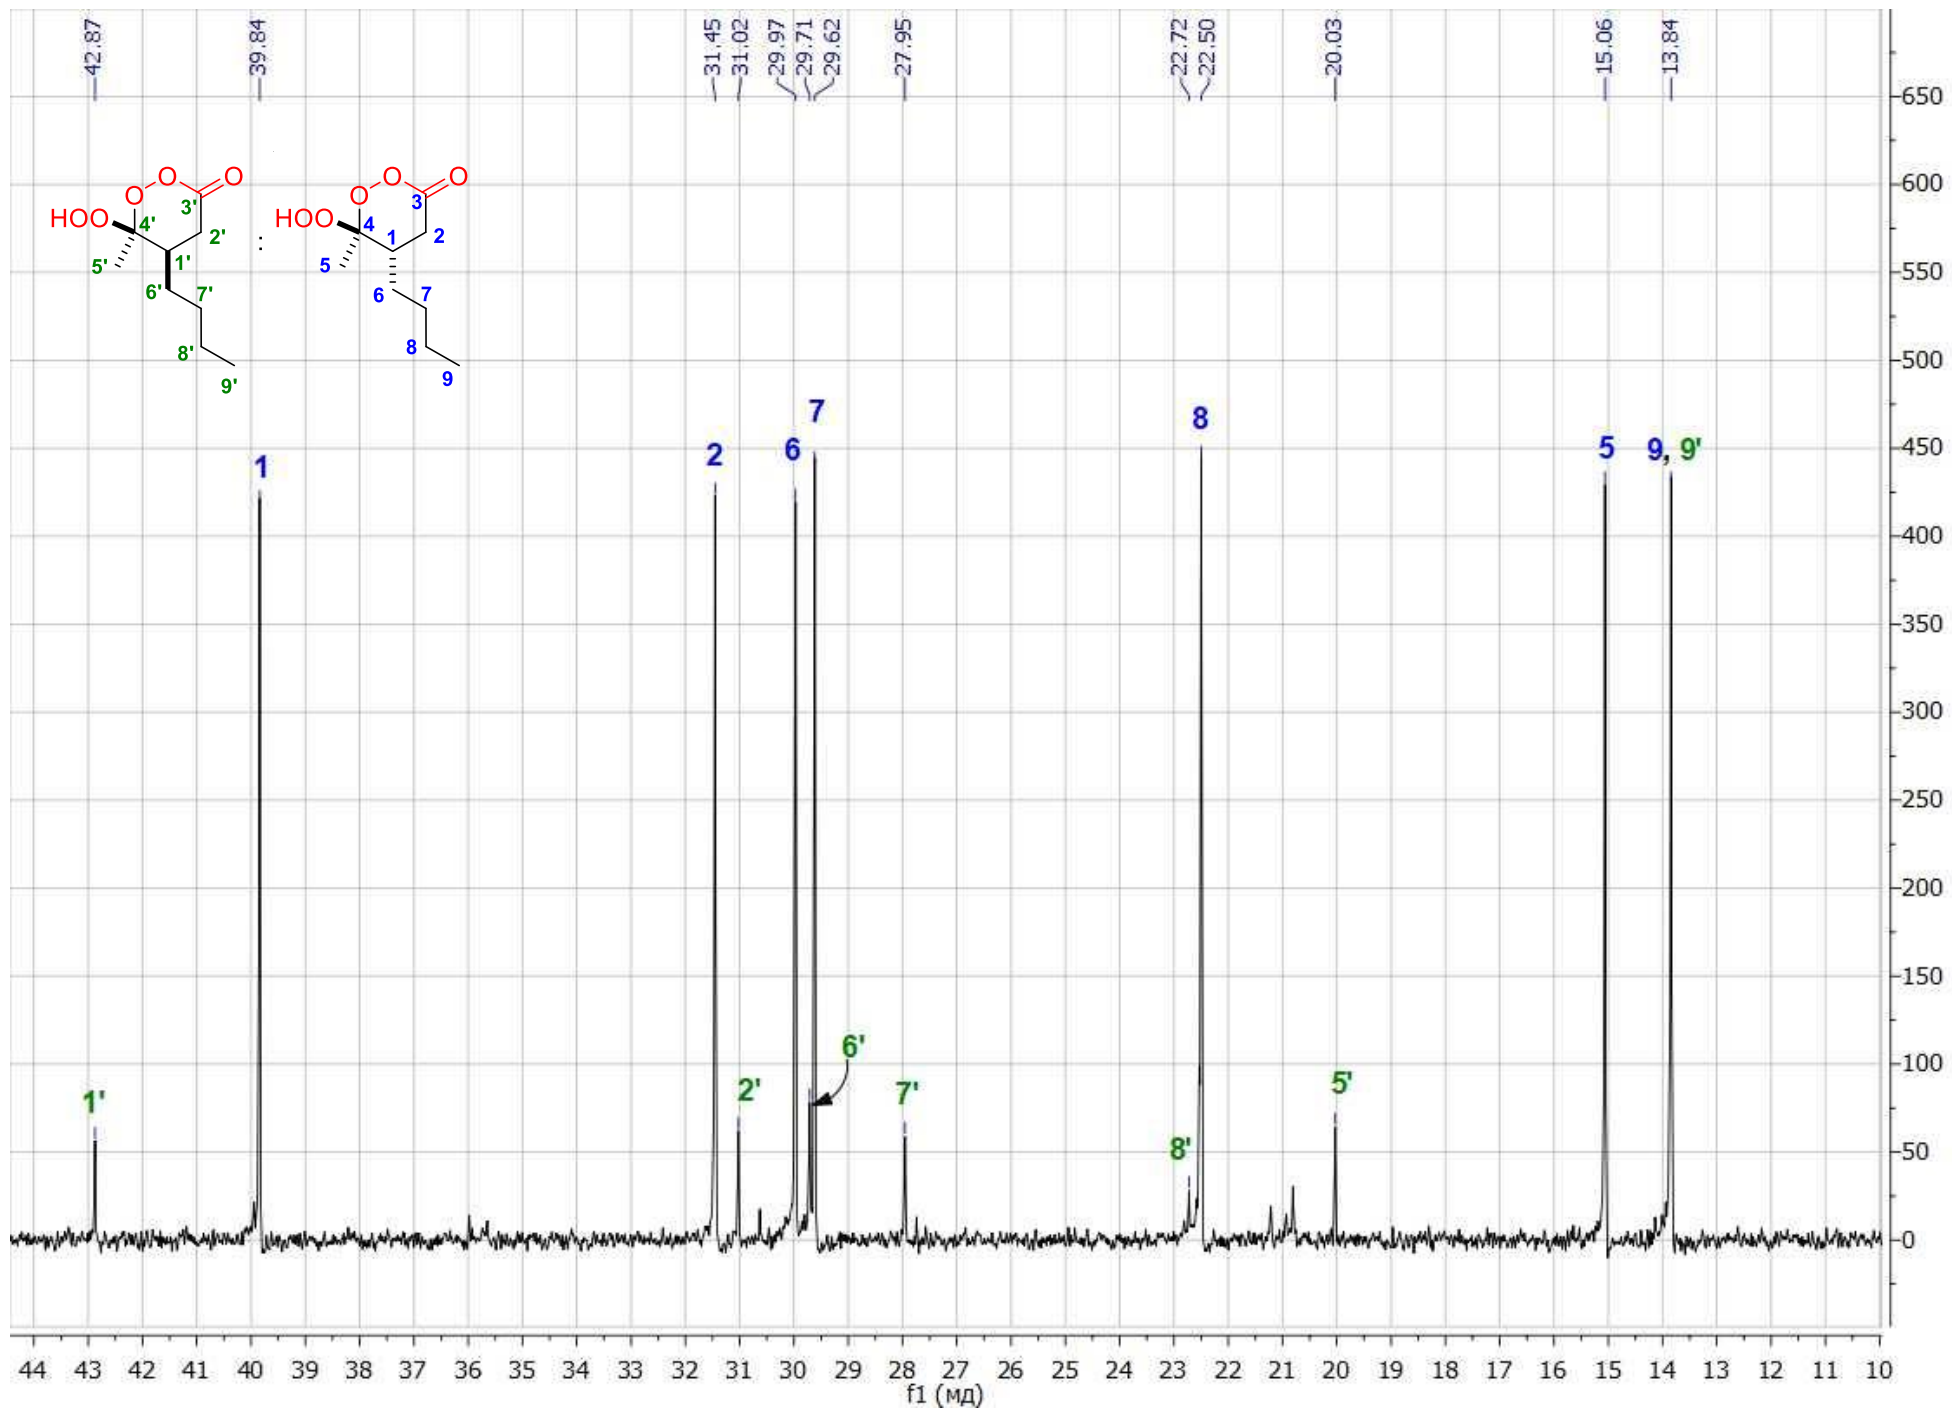

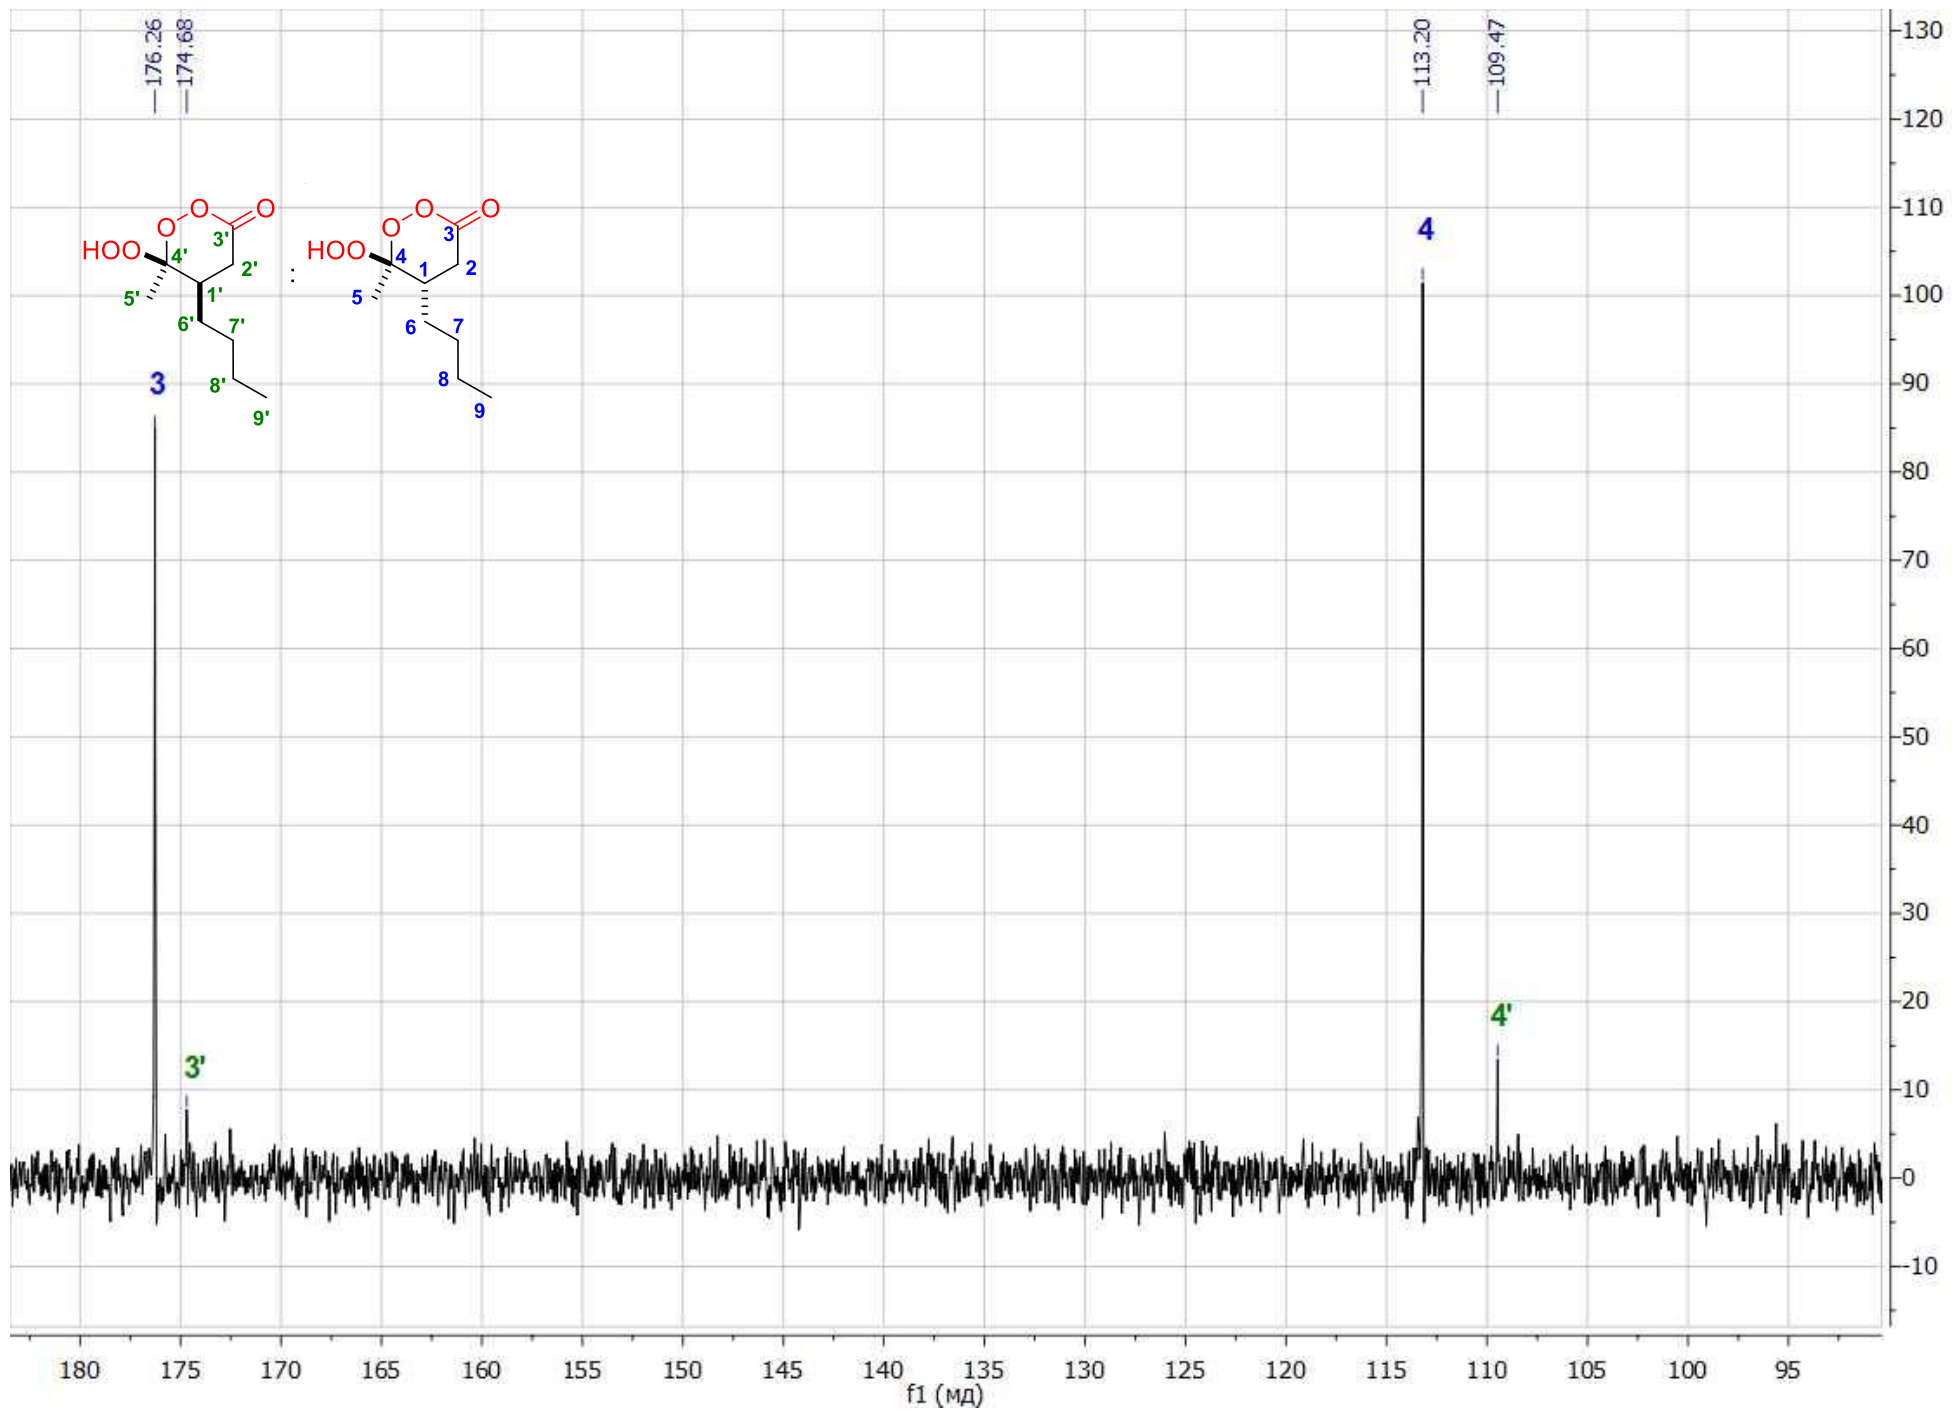

<sup>13</sup>C\_deptsp135

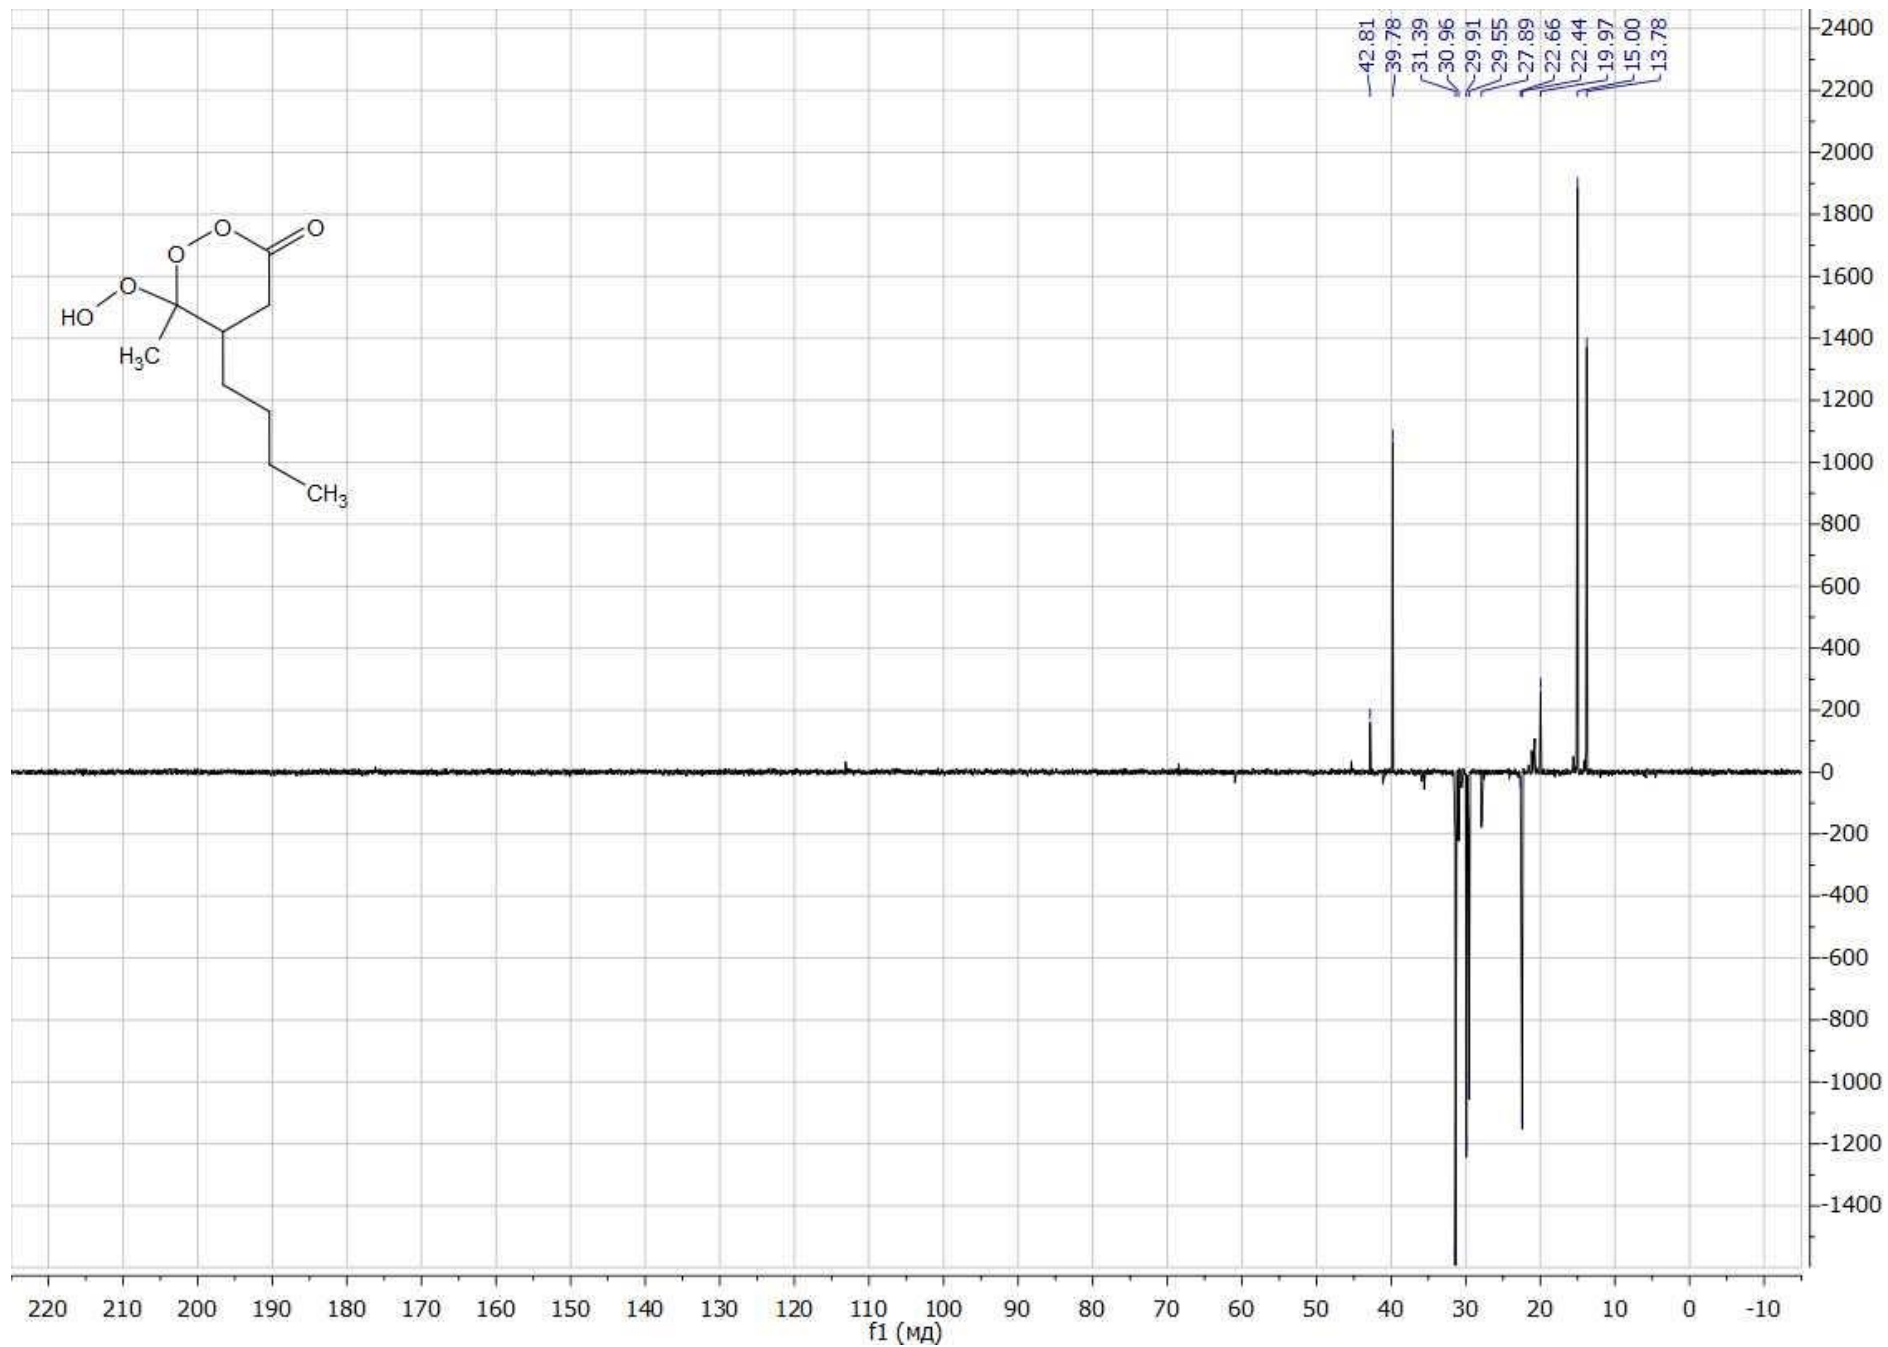

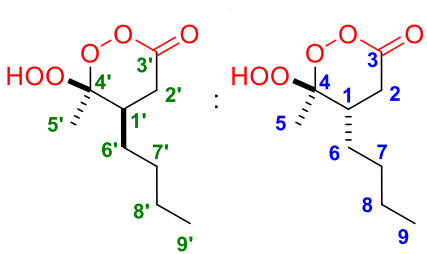

{<sup>1</sup>H-<sup>1</sup>H} COSY

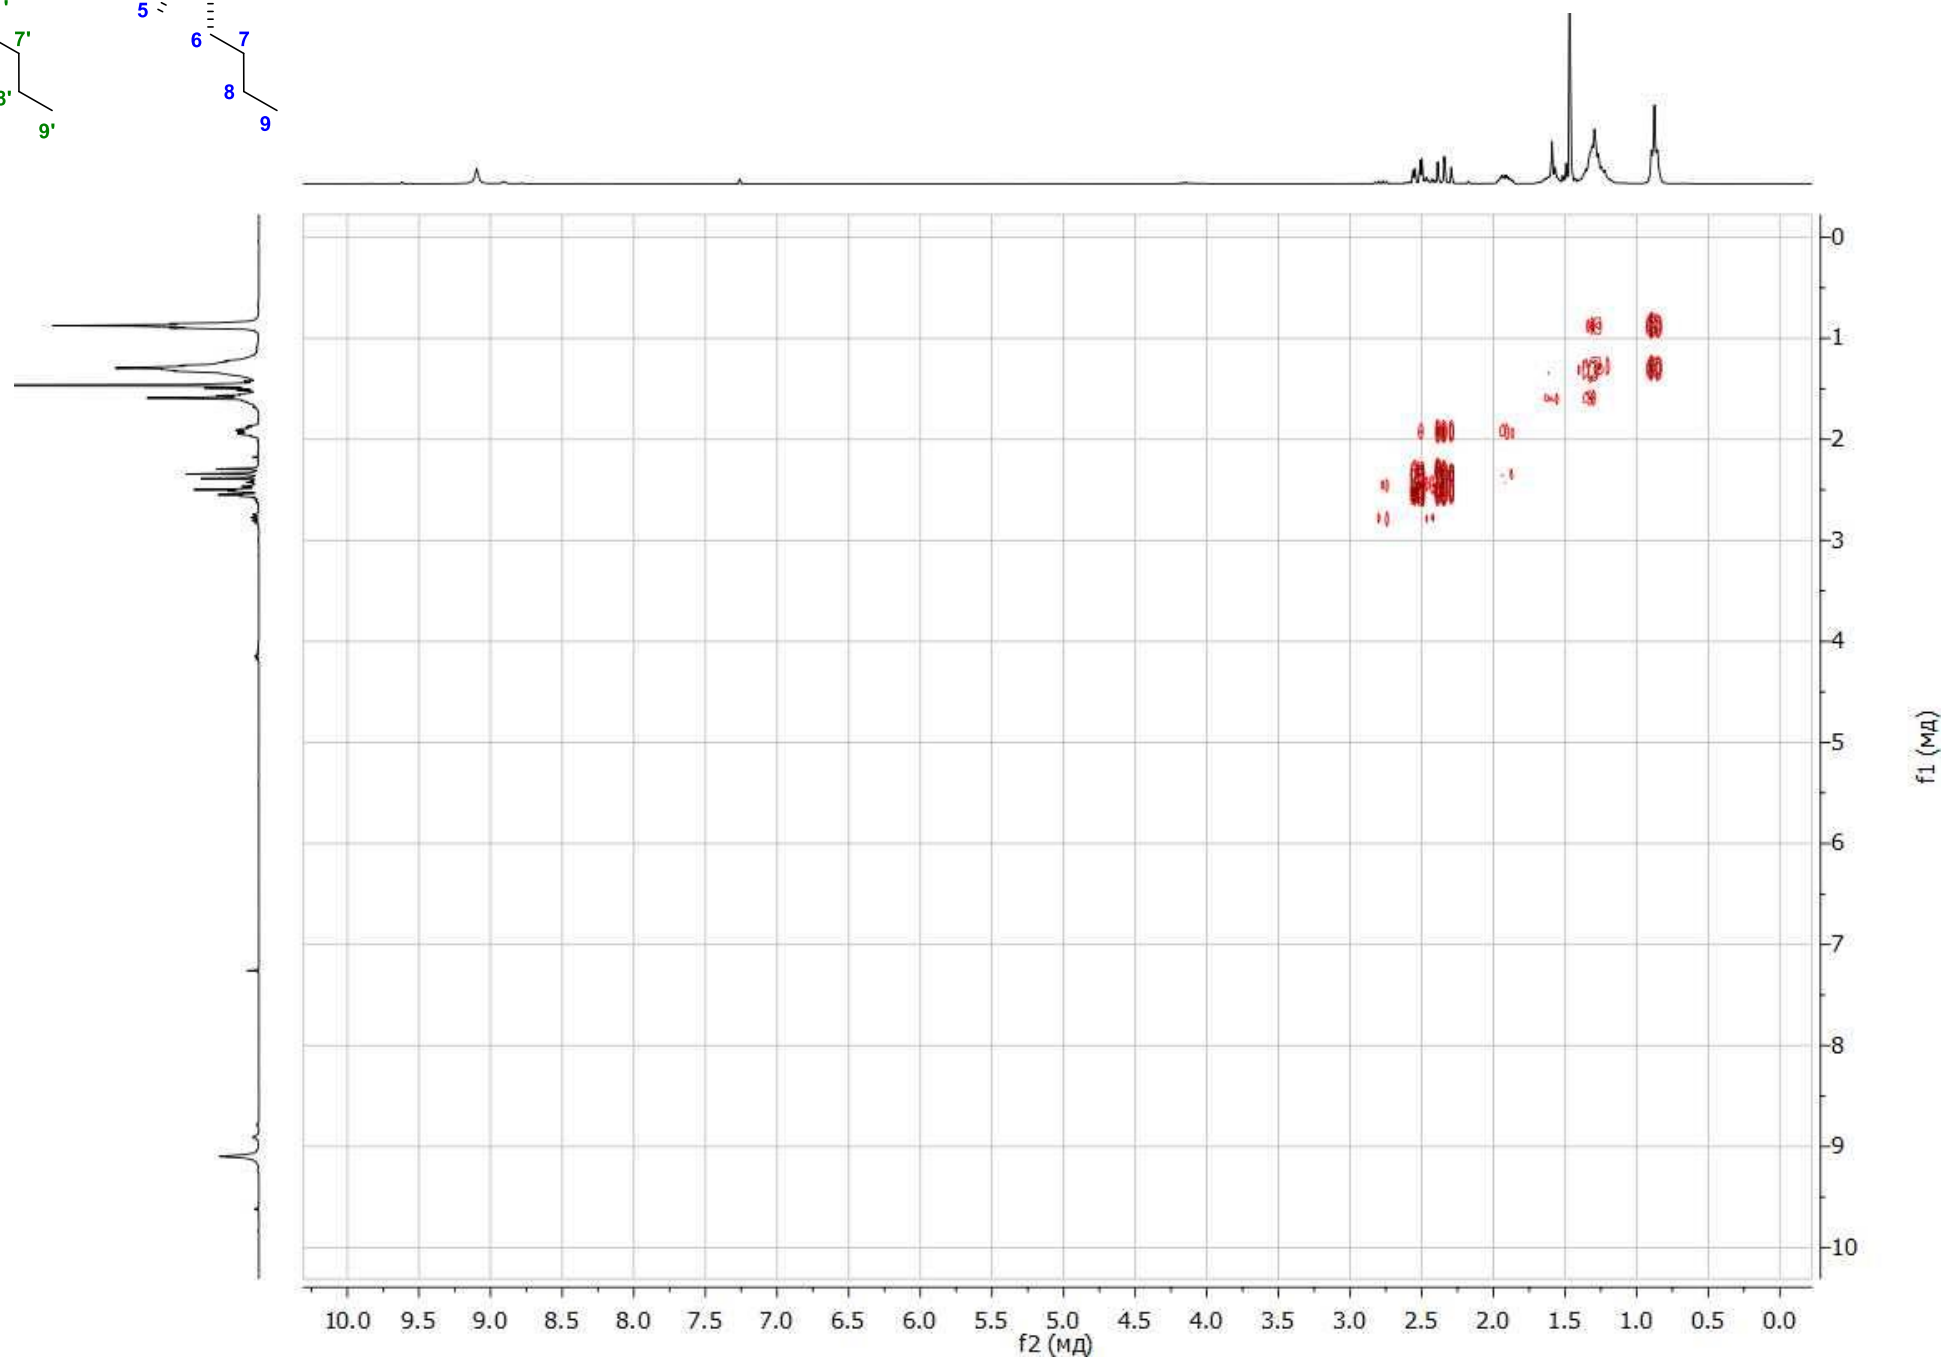

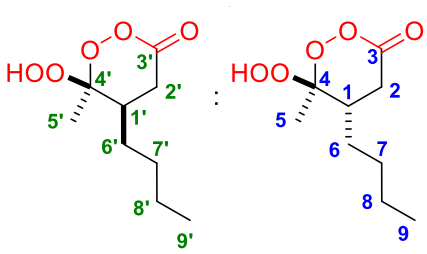

{<sup>1</sup>H-<sup>1</sup>H} NOESY

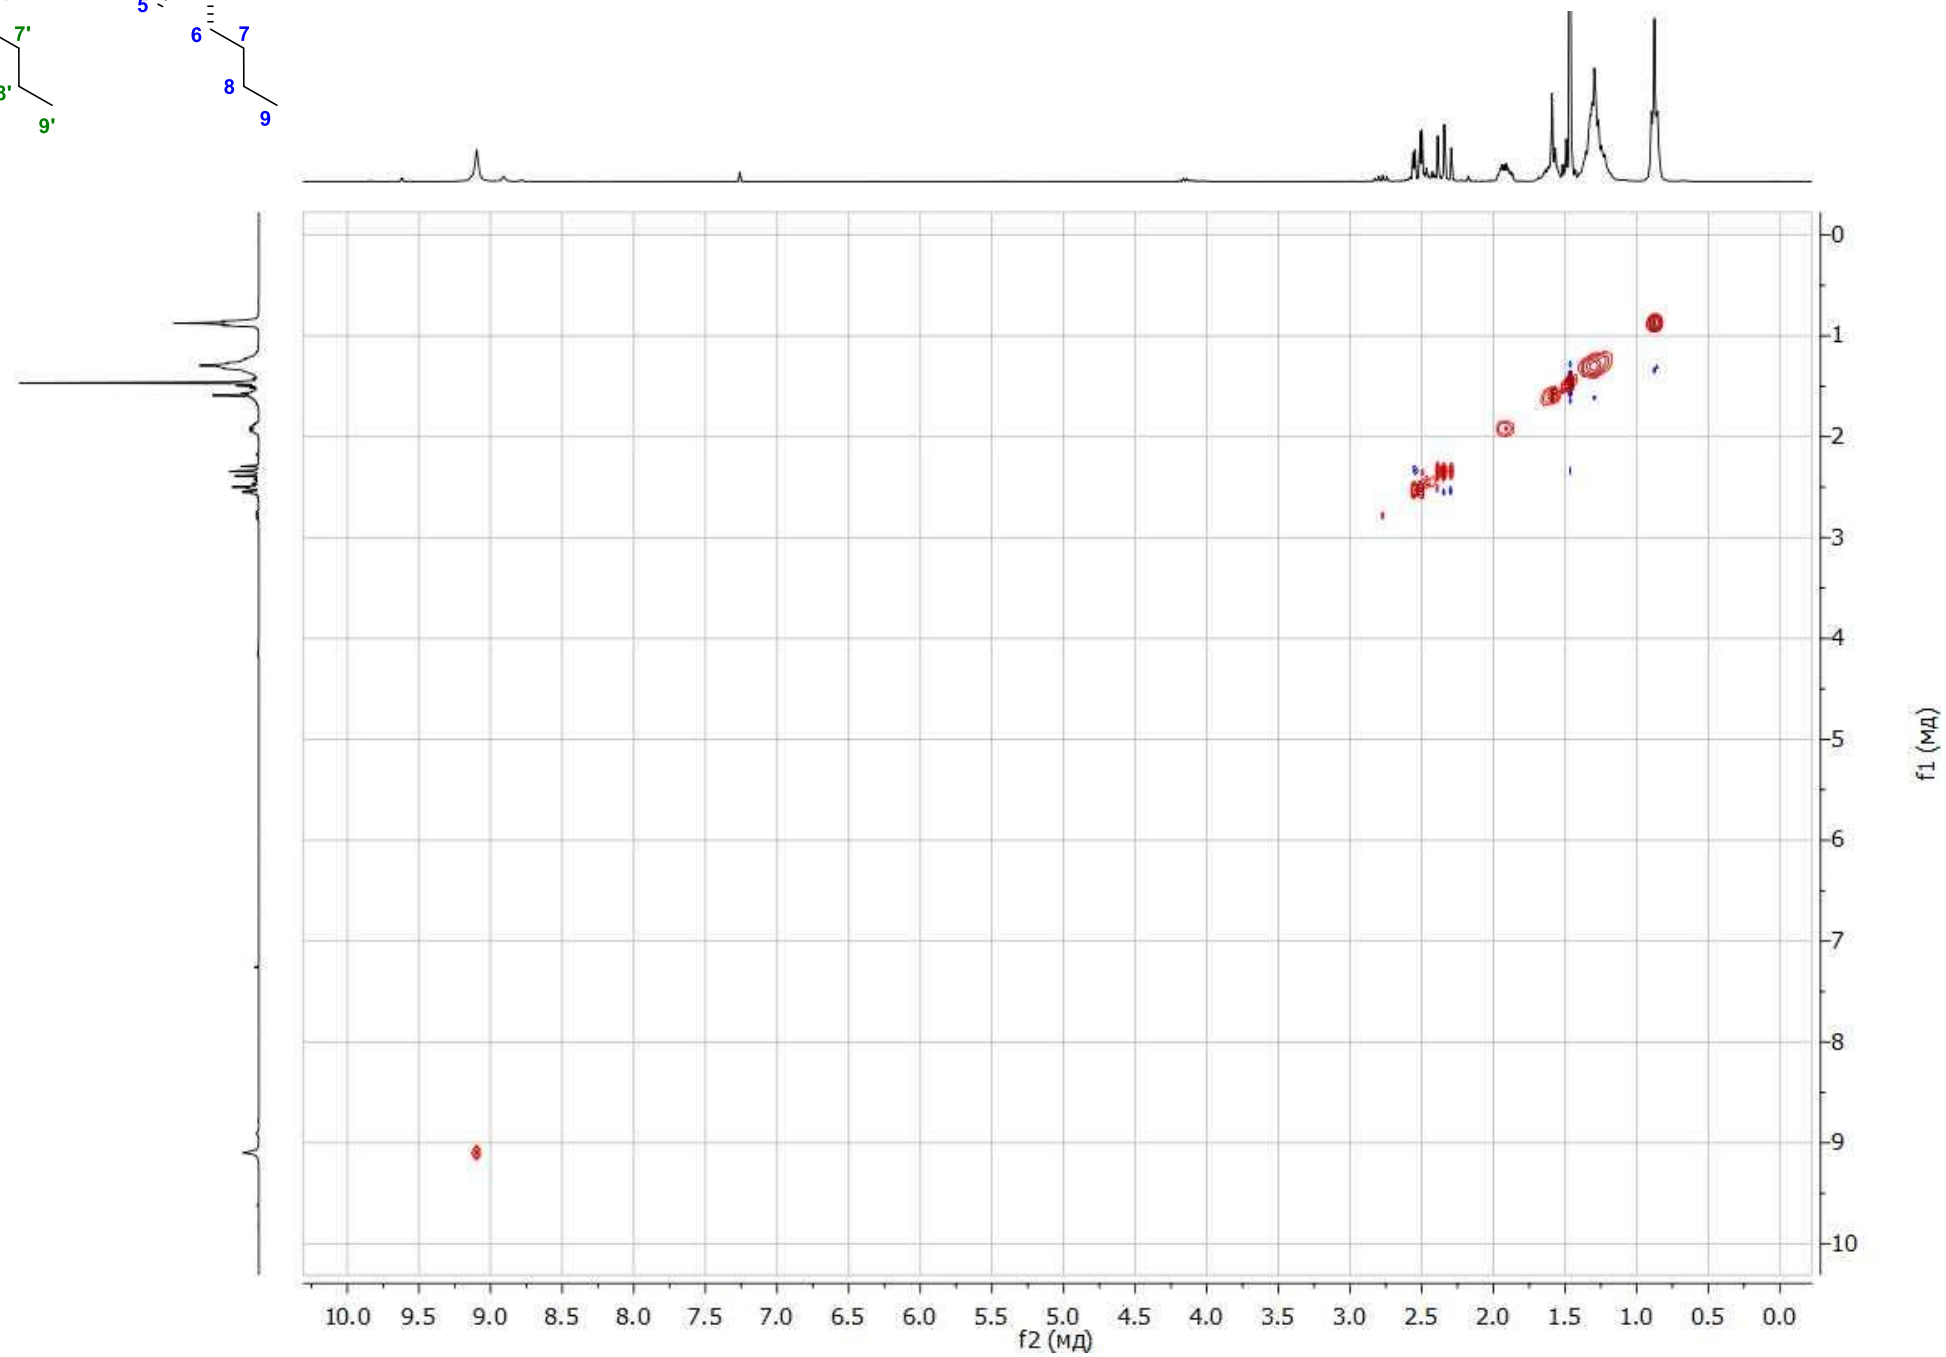

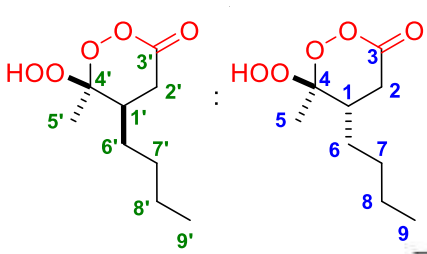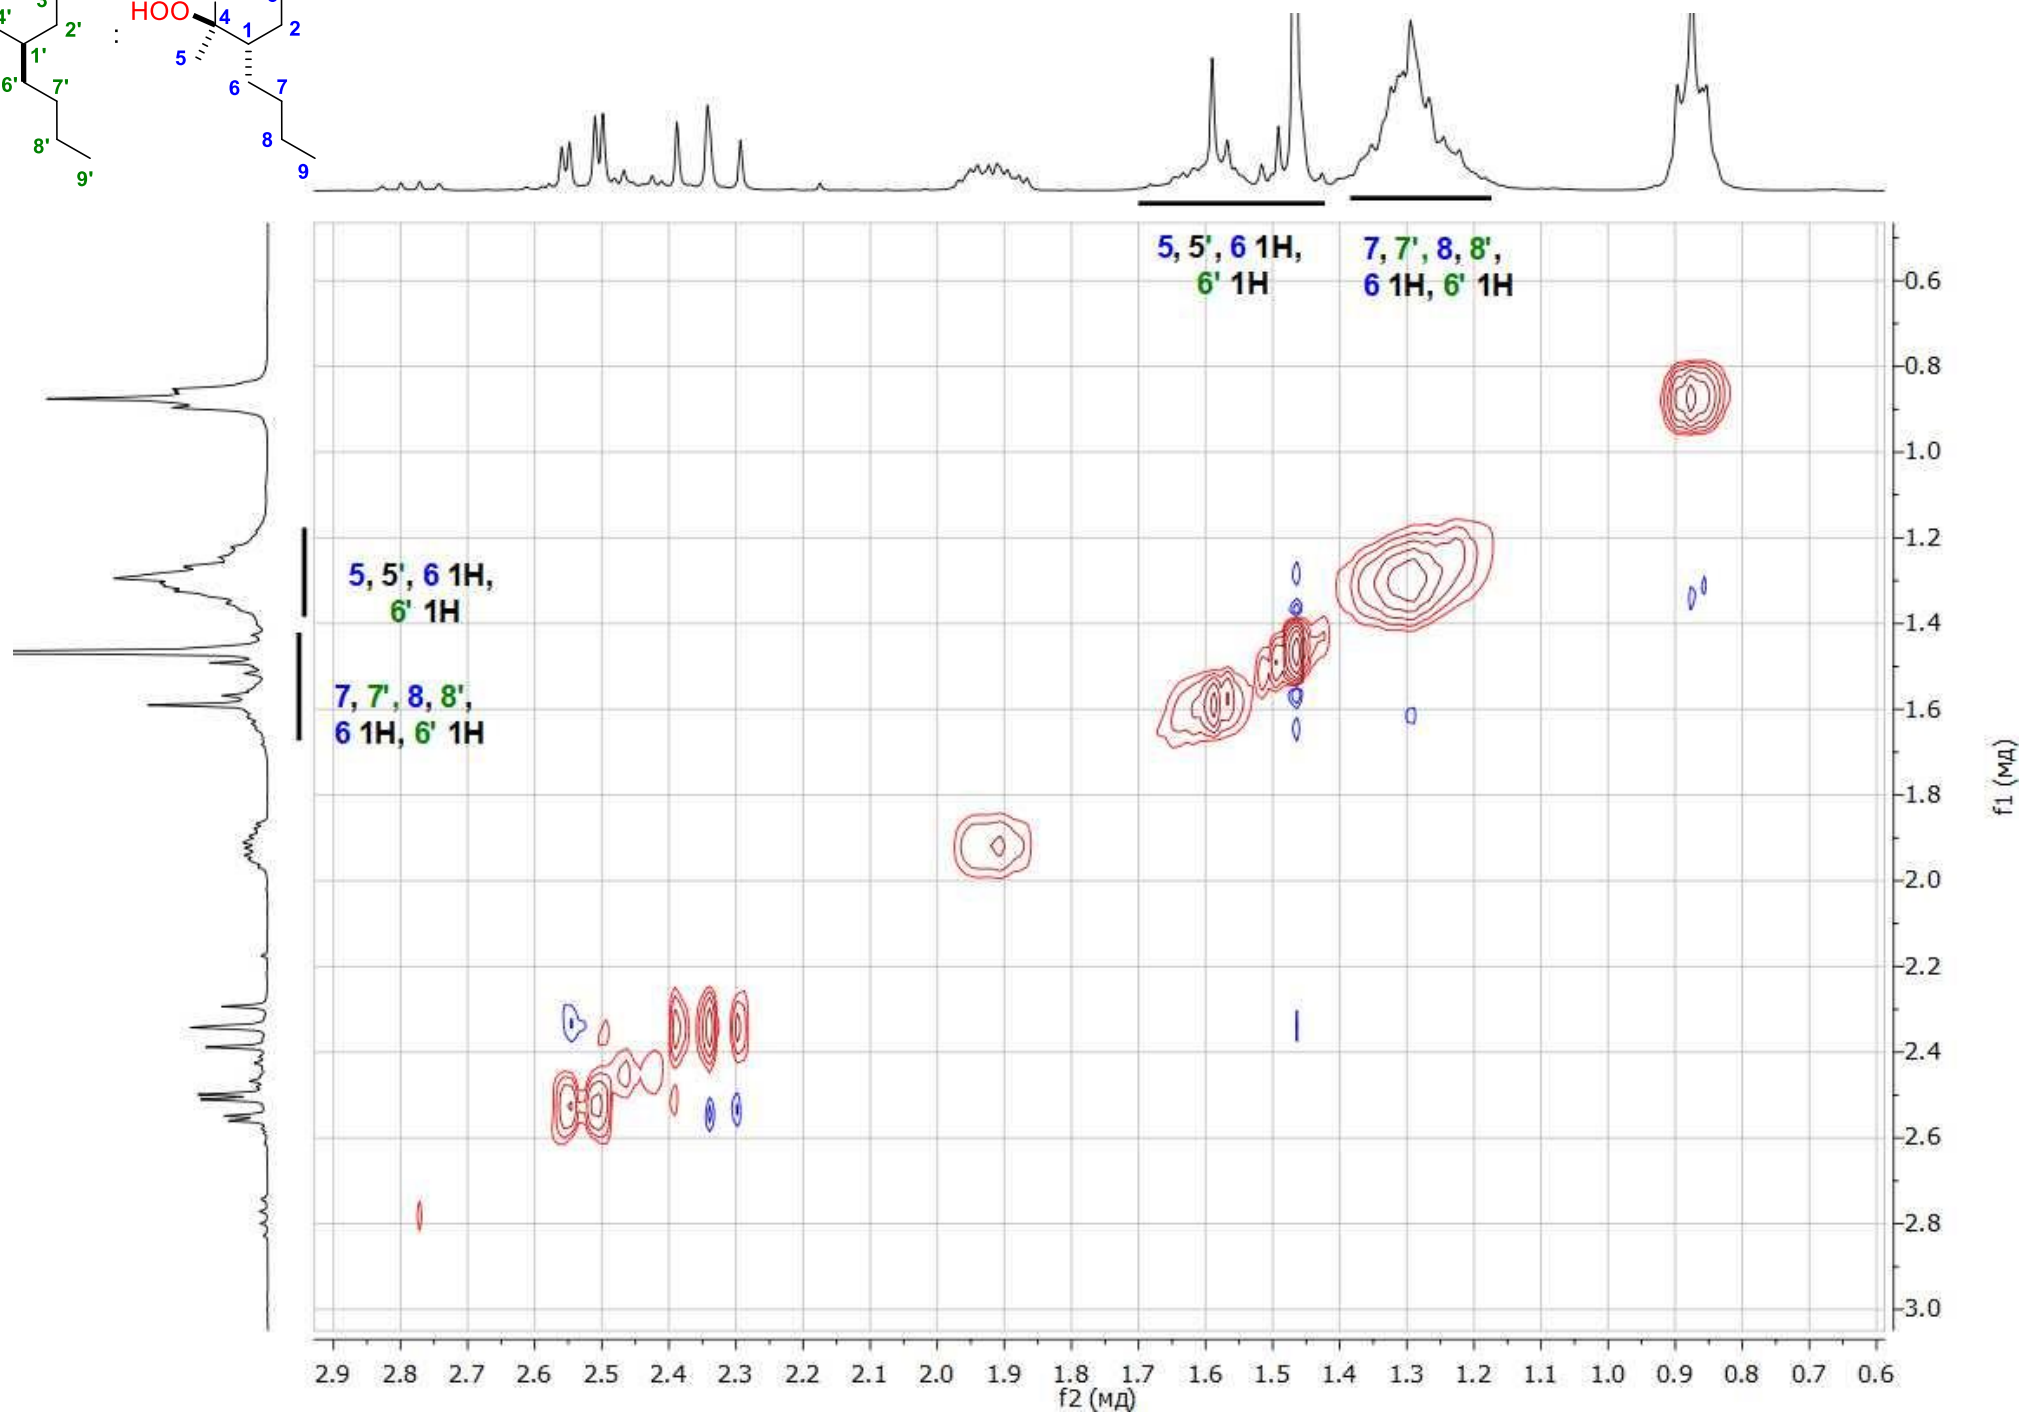



{<sup>1</sup>H-<sup>13</sup>C} HSQC

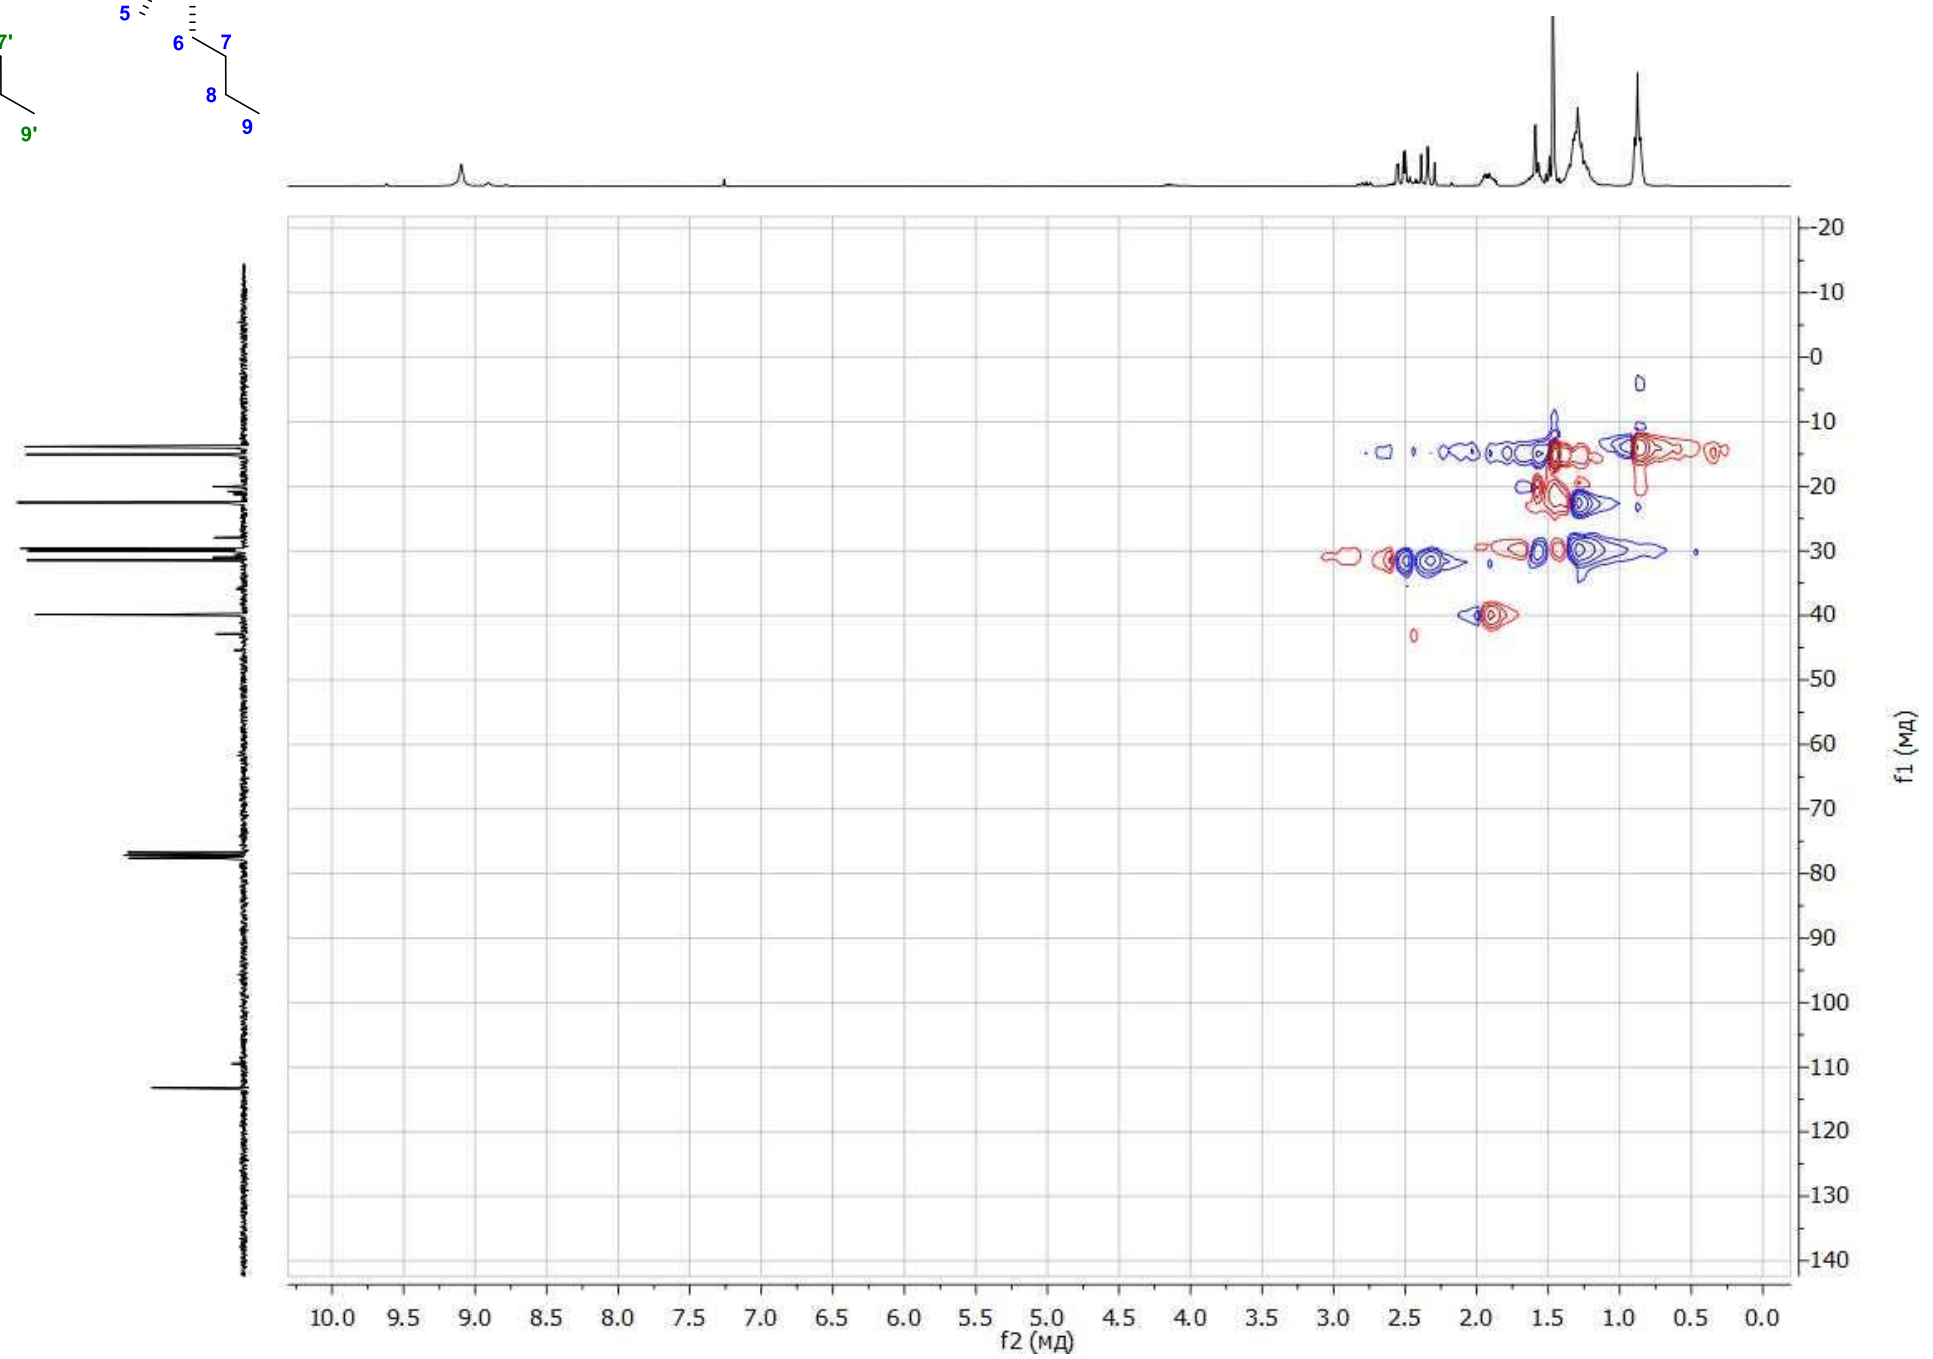



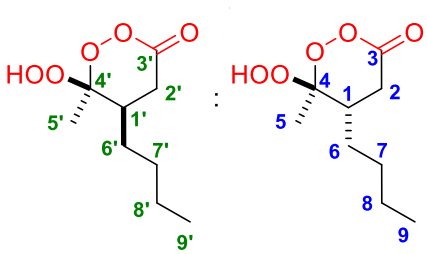

{<sup>1</sup>H-<sup>13</sup>C} HMBC

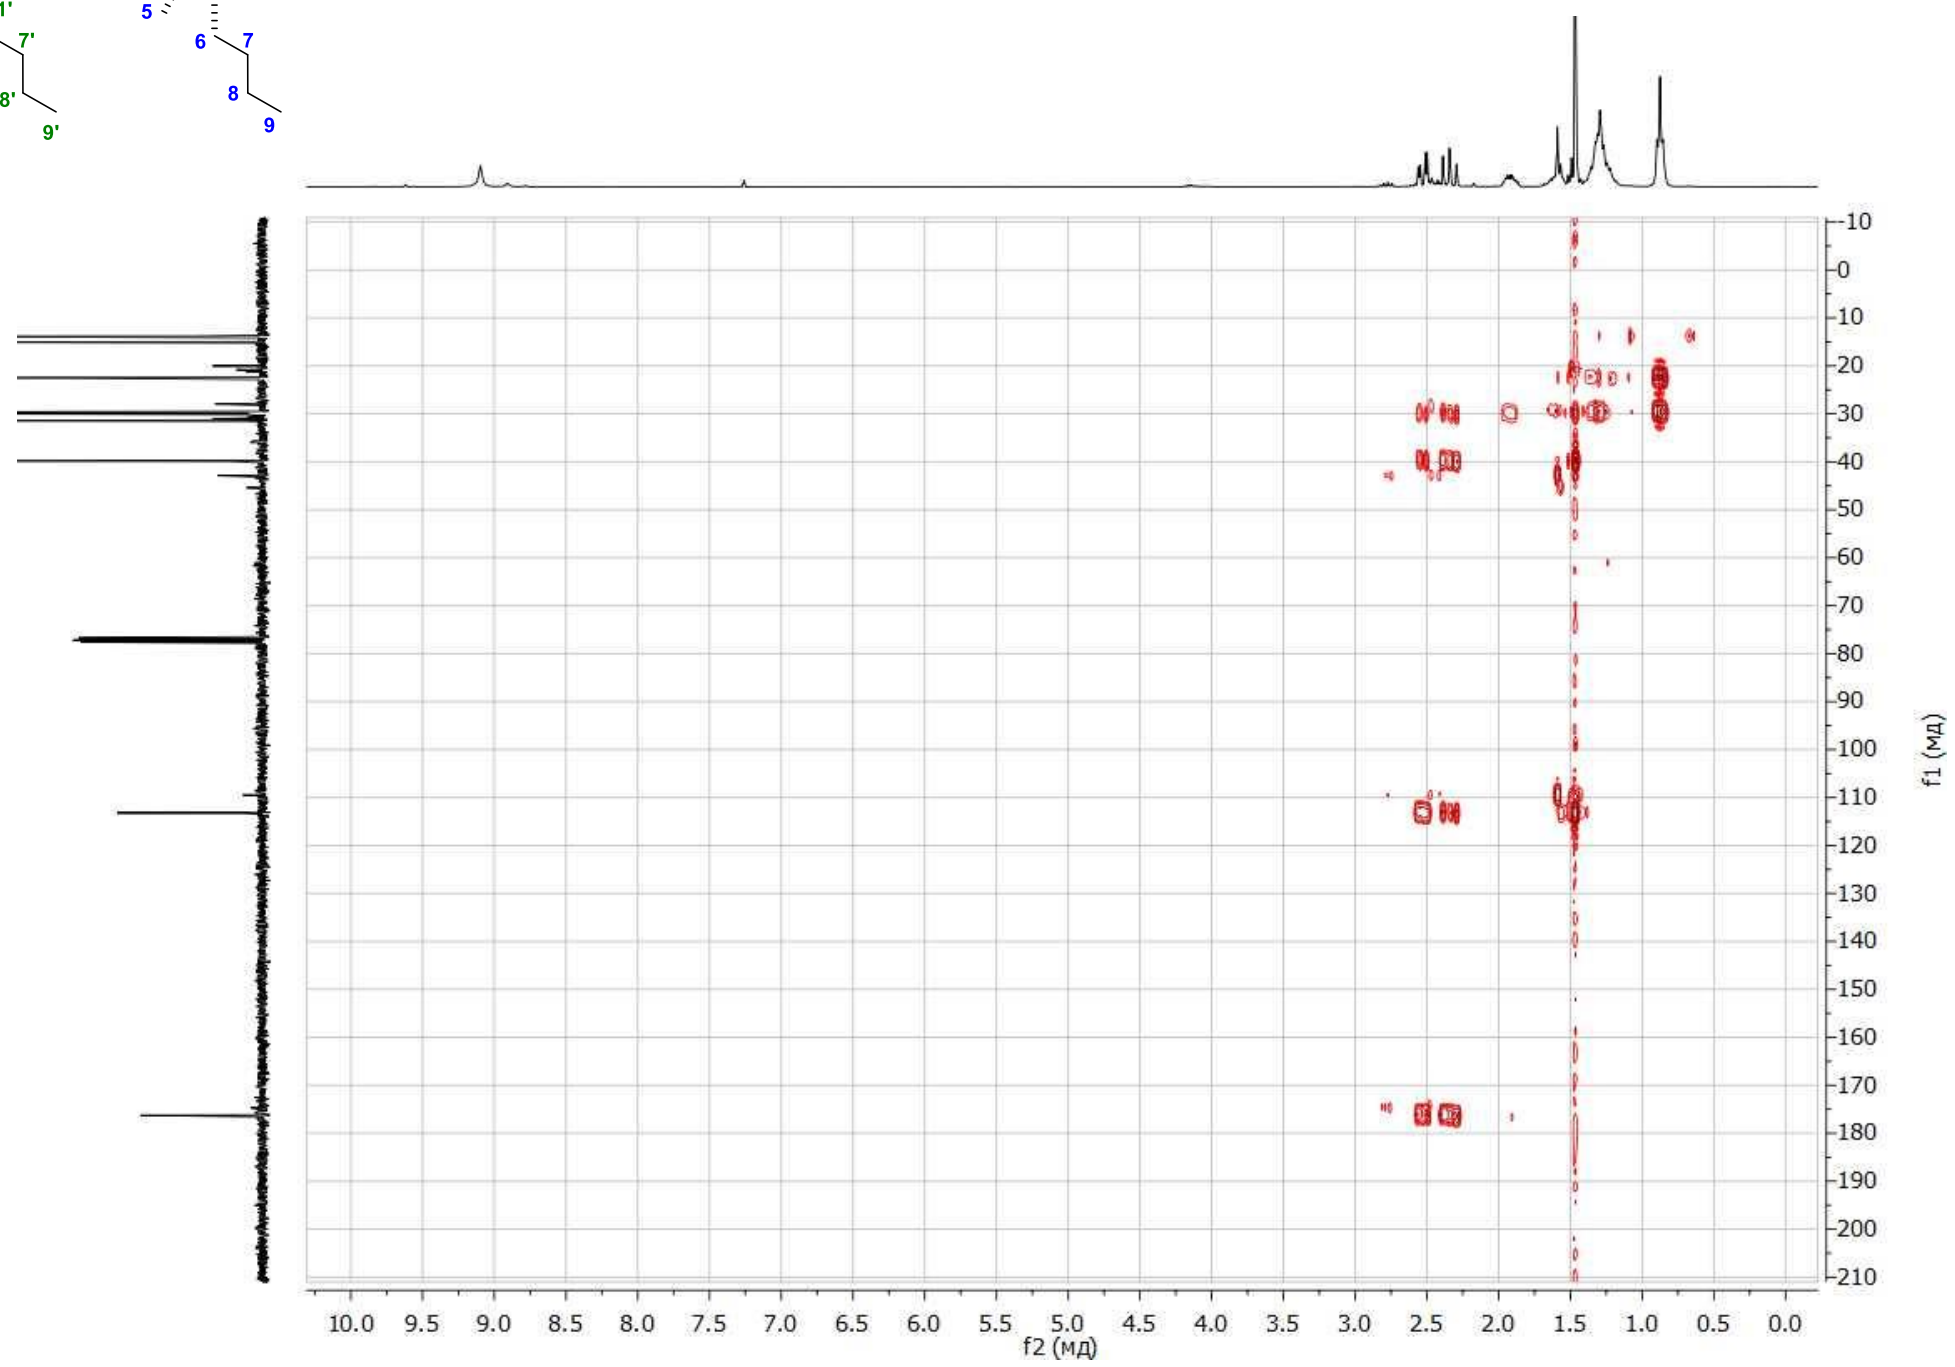

# 5-Hexyl-6-hydroperoxy-6-methyl-1,2-dioxan-3-one, 2k

## <sup>1</sup>H NMR

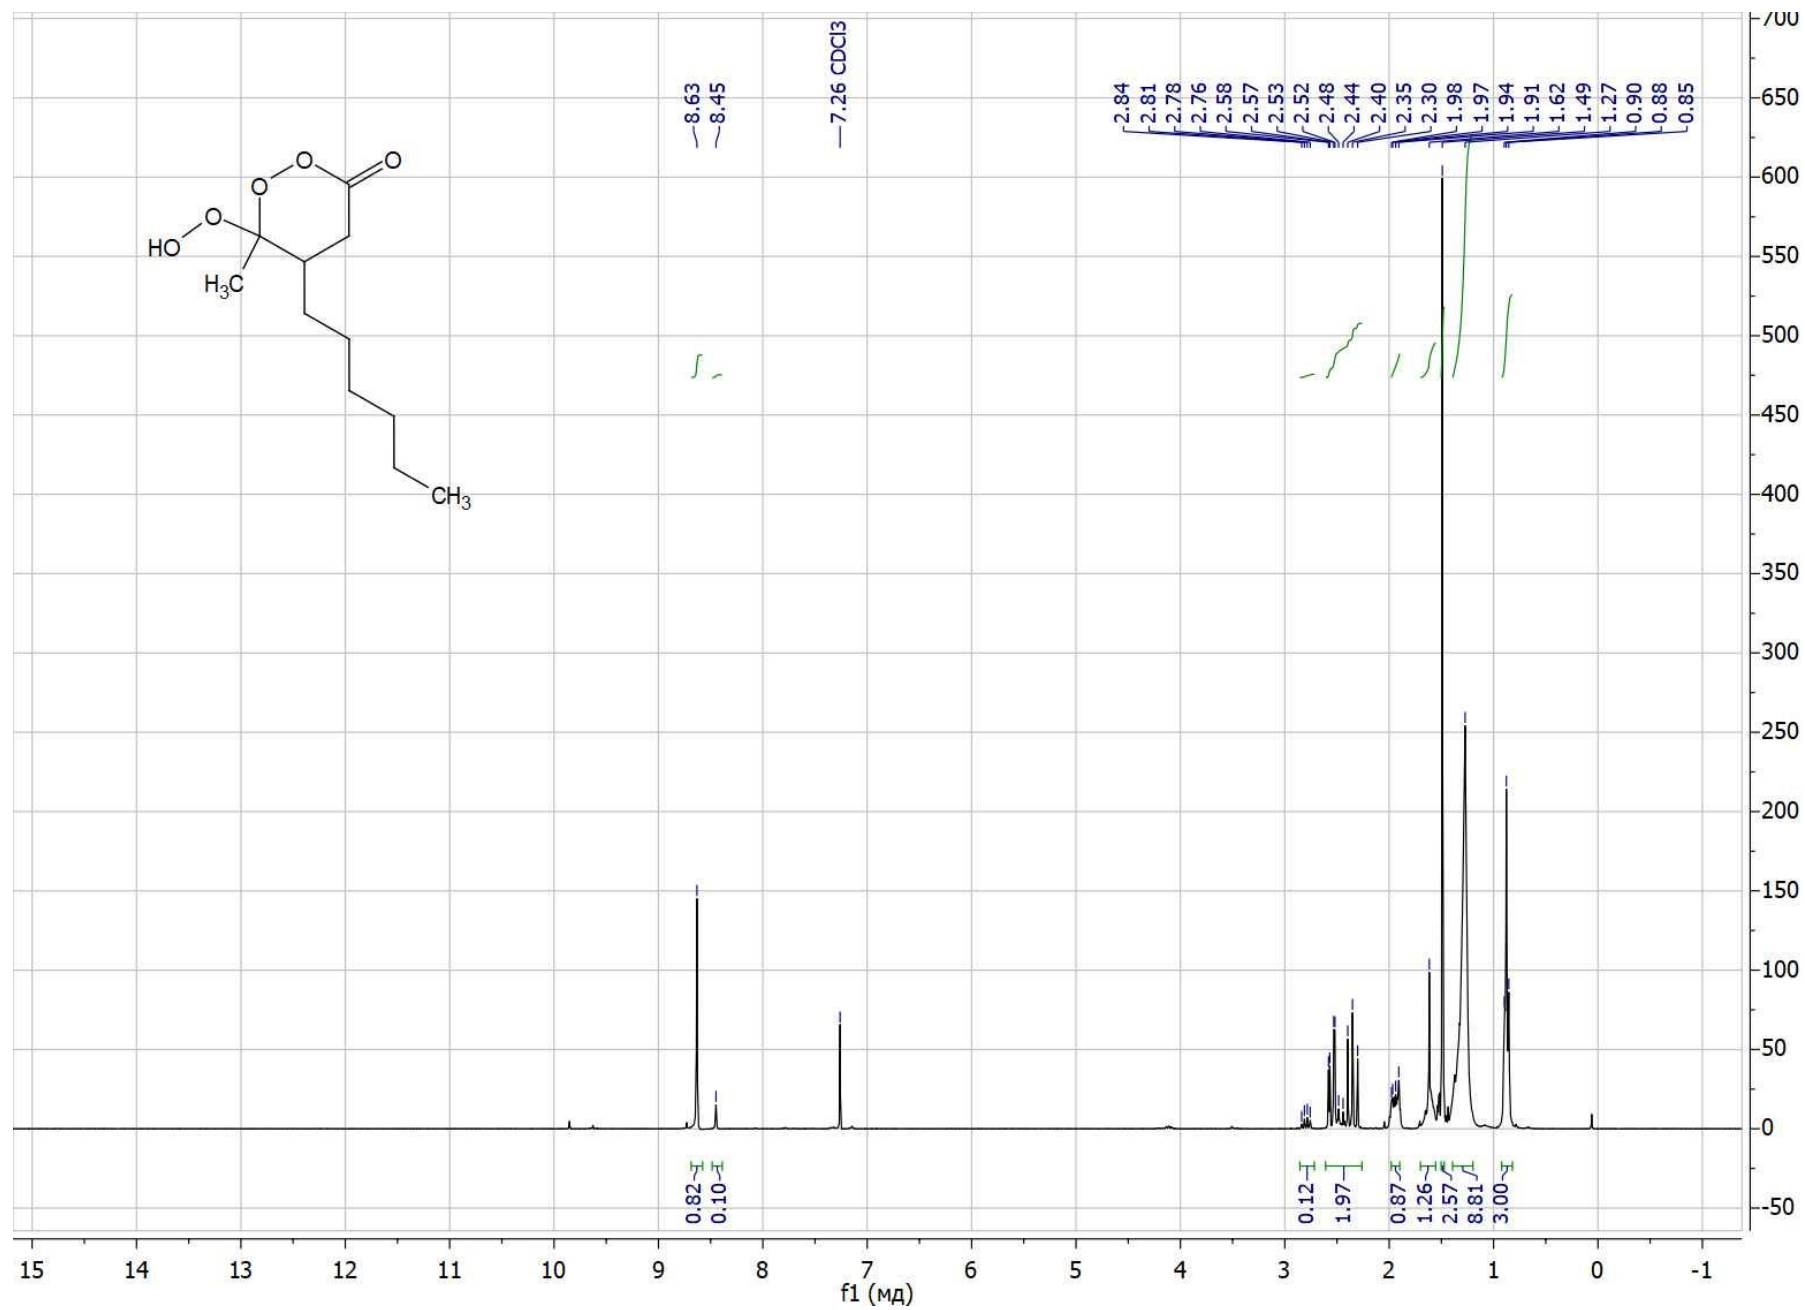

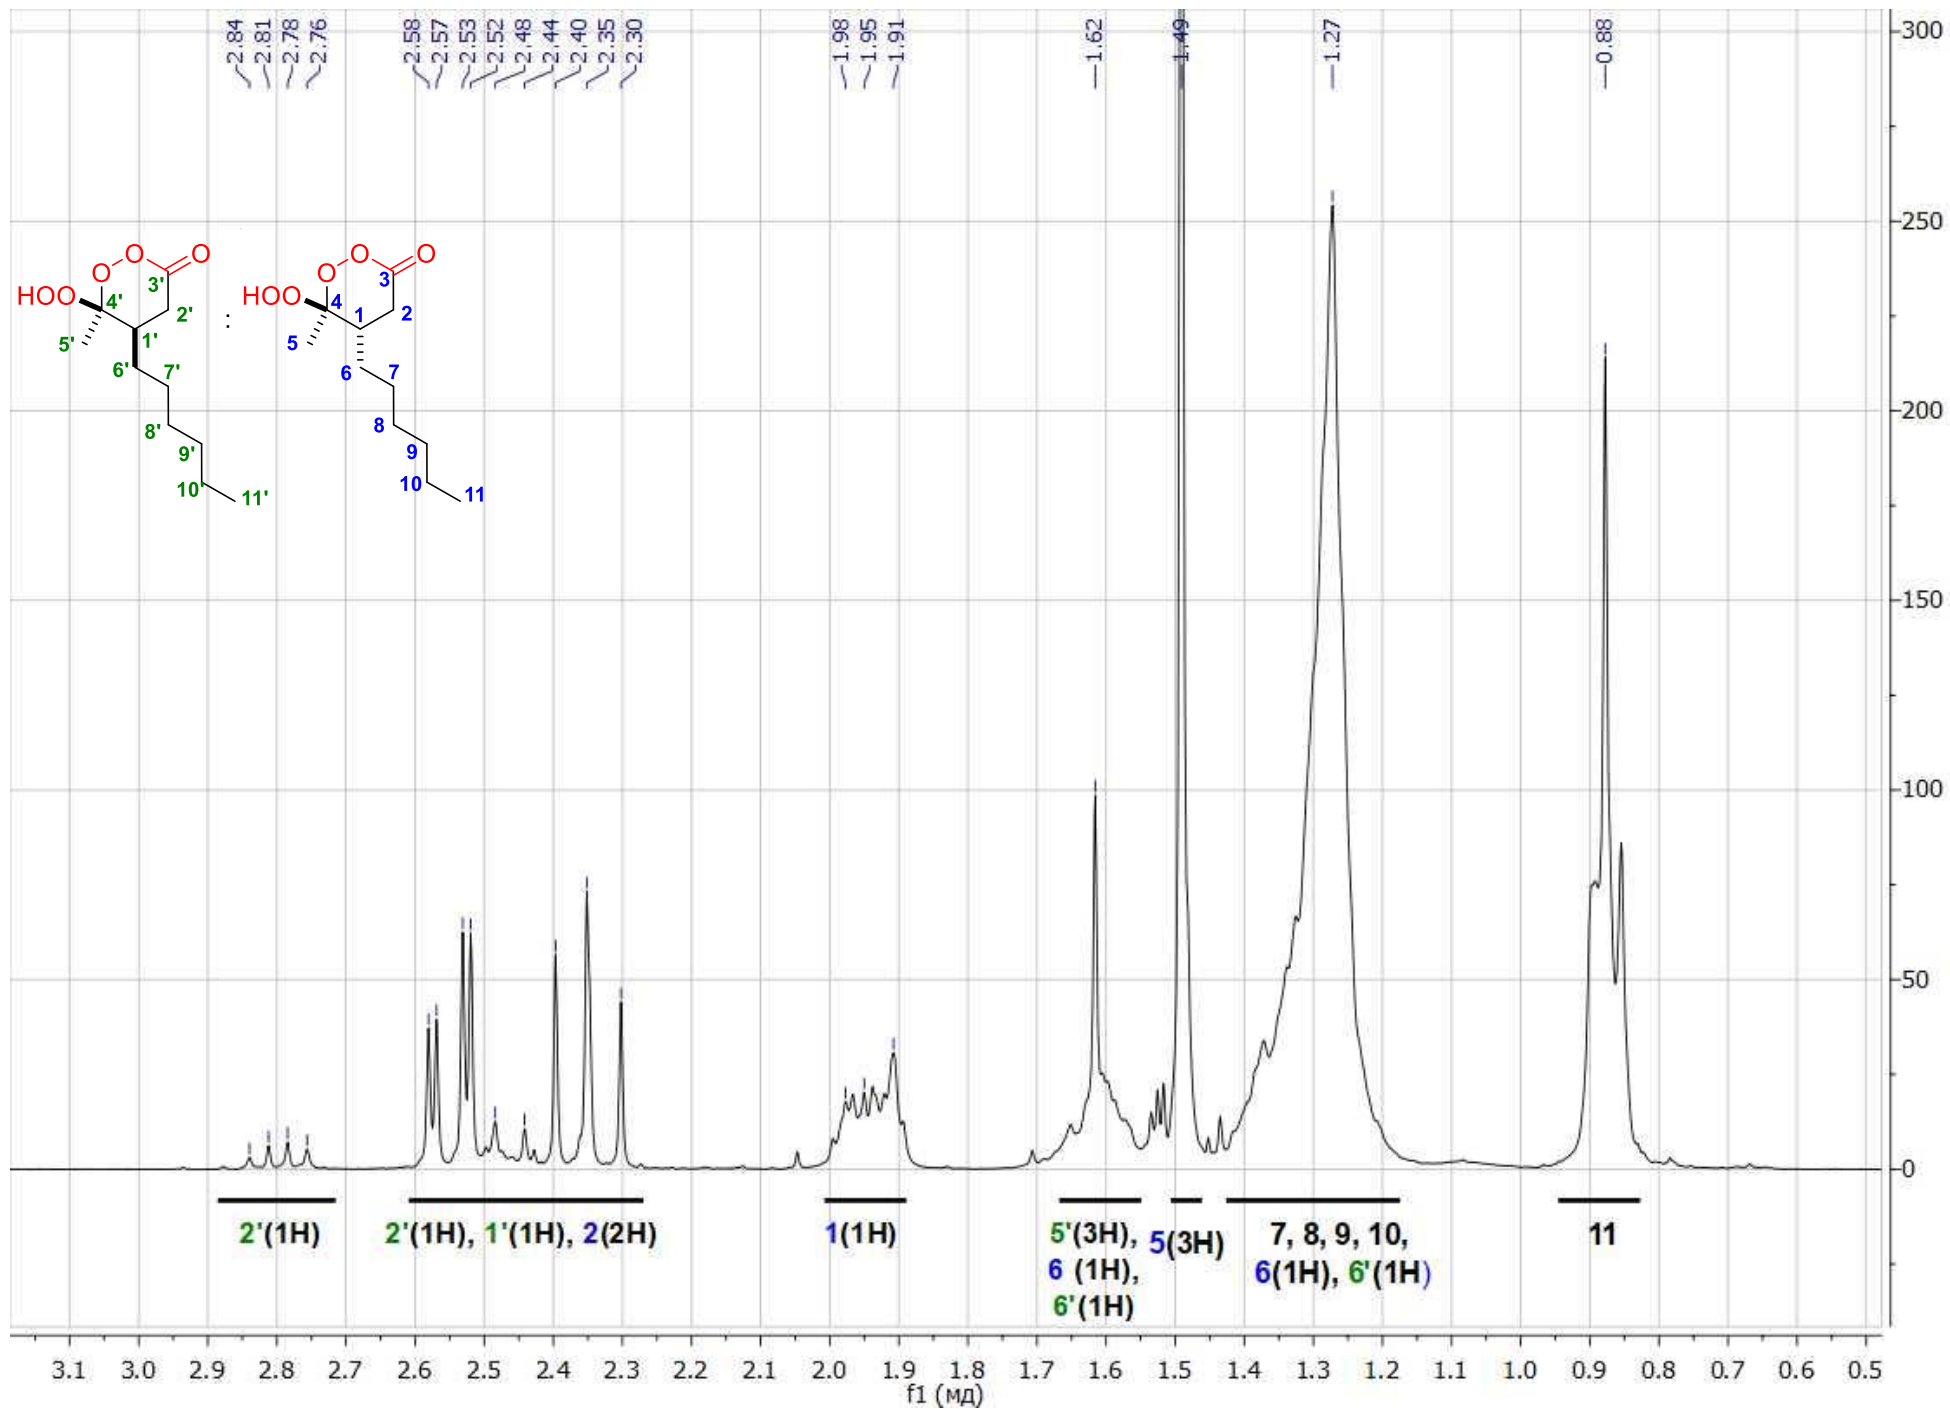

<sup>13</sup>C NMR

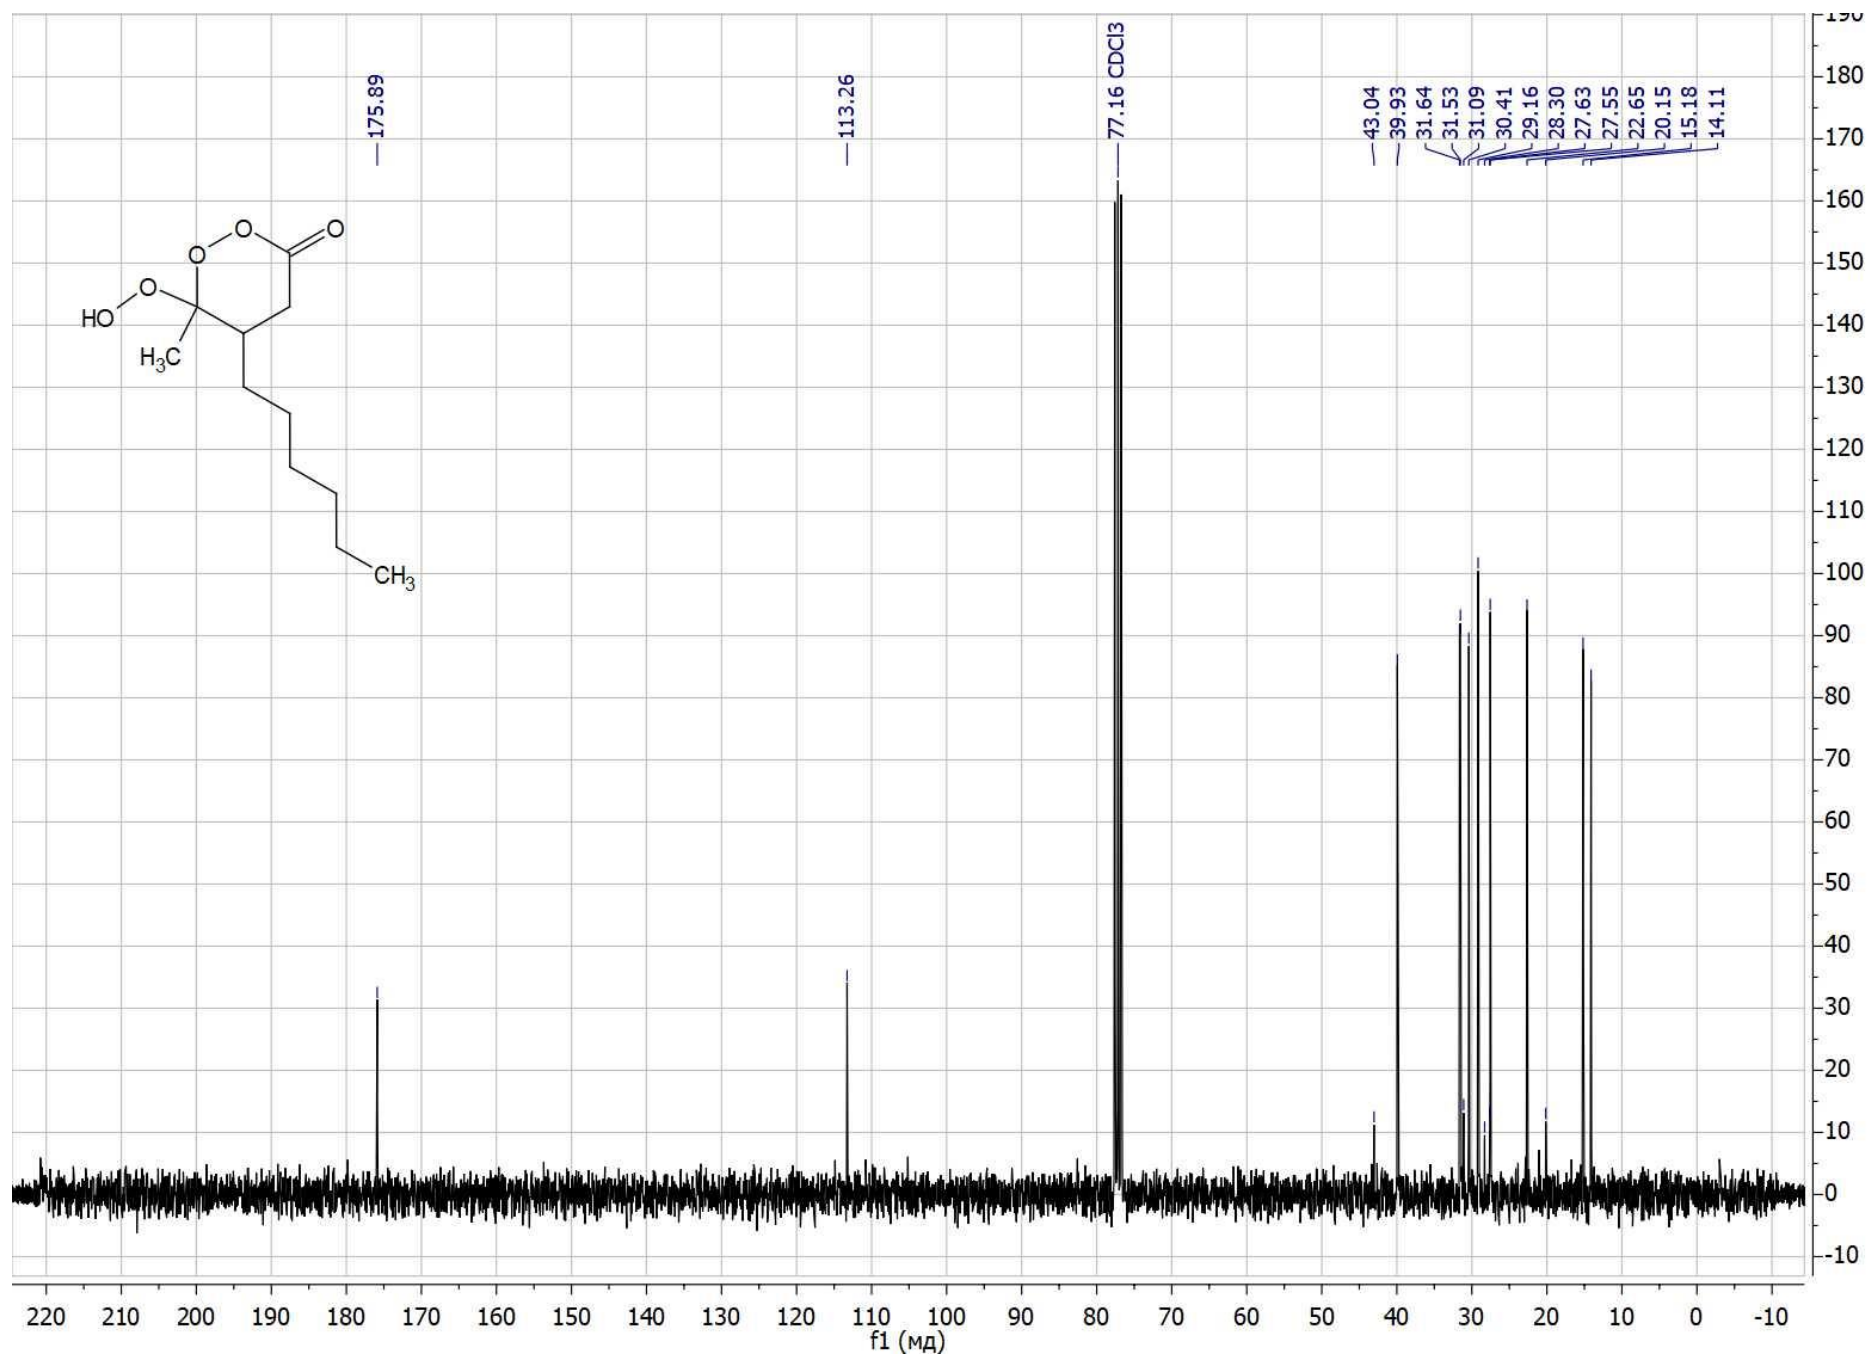

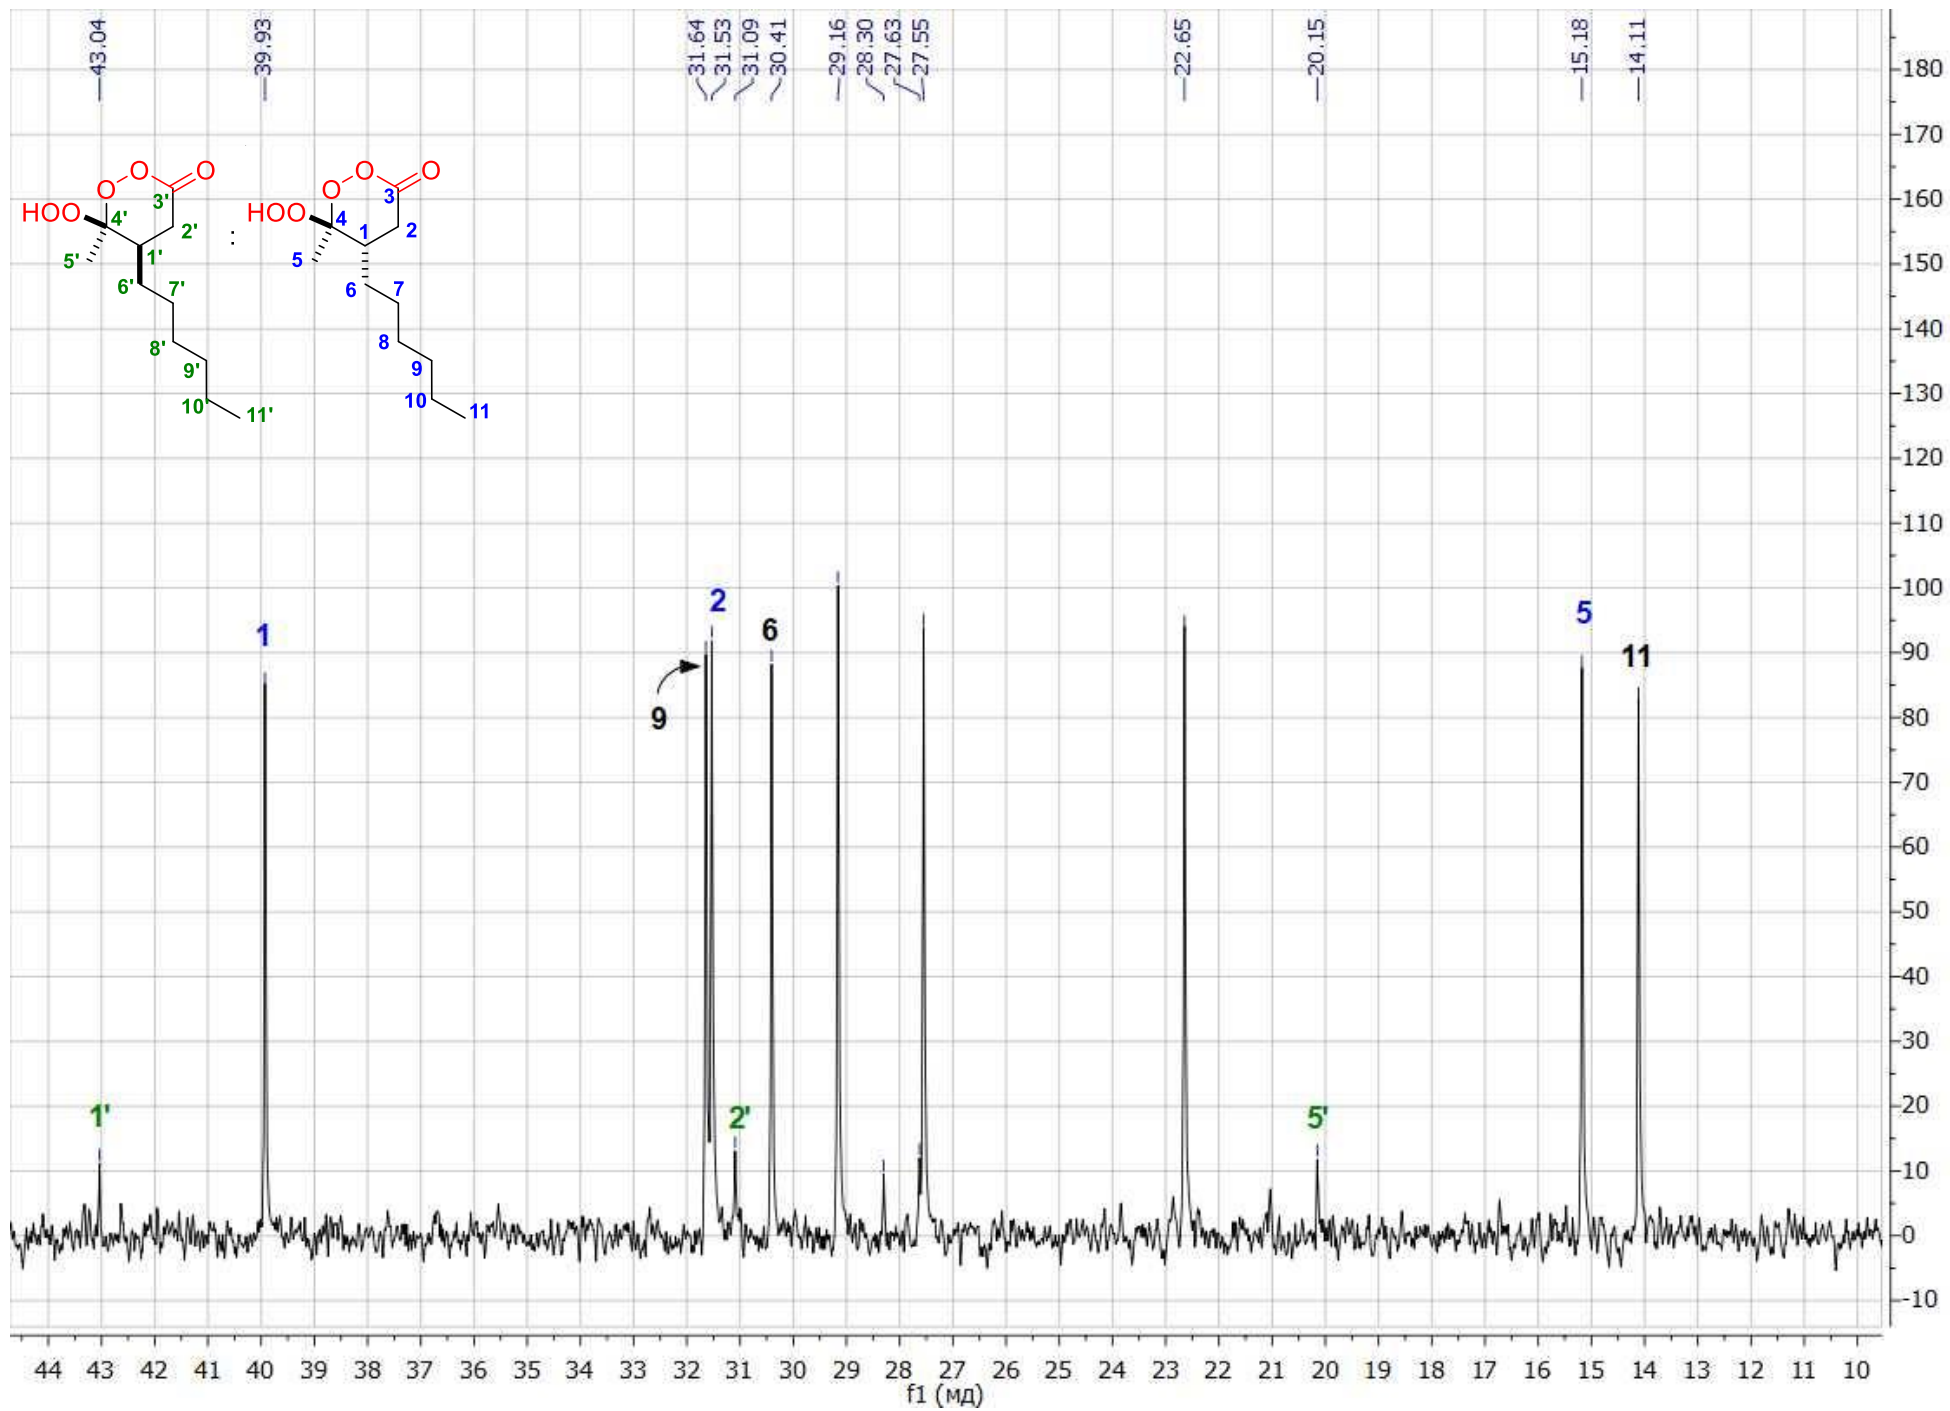

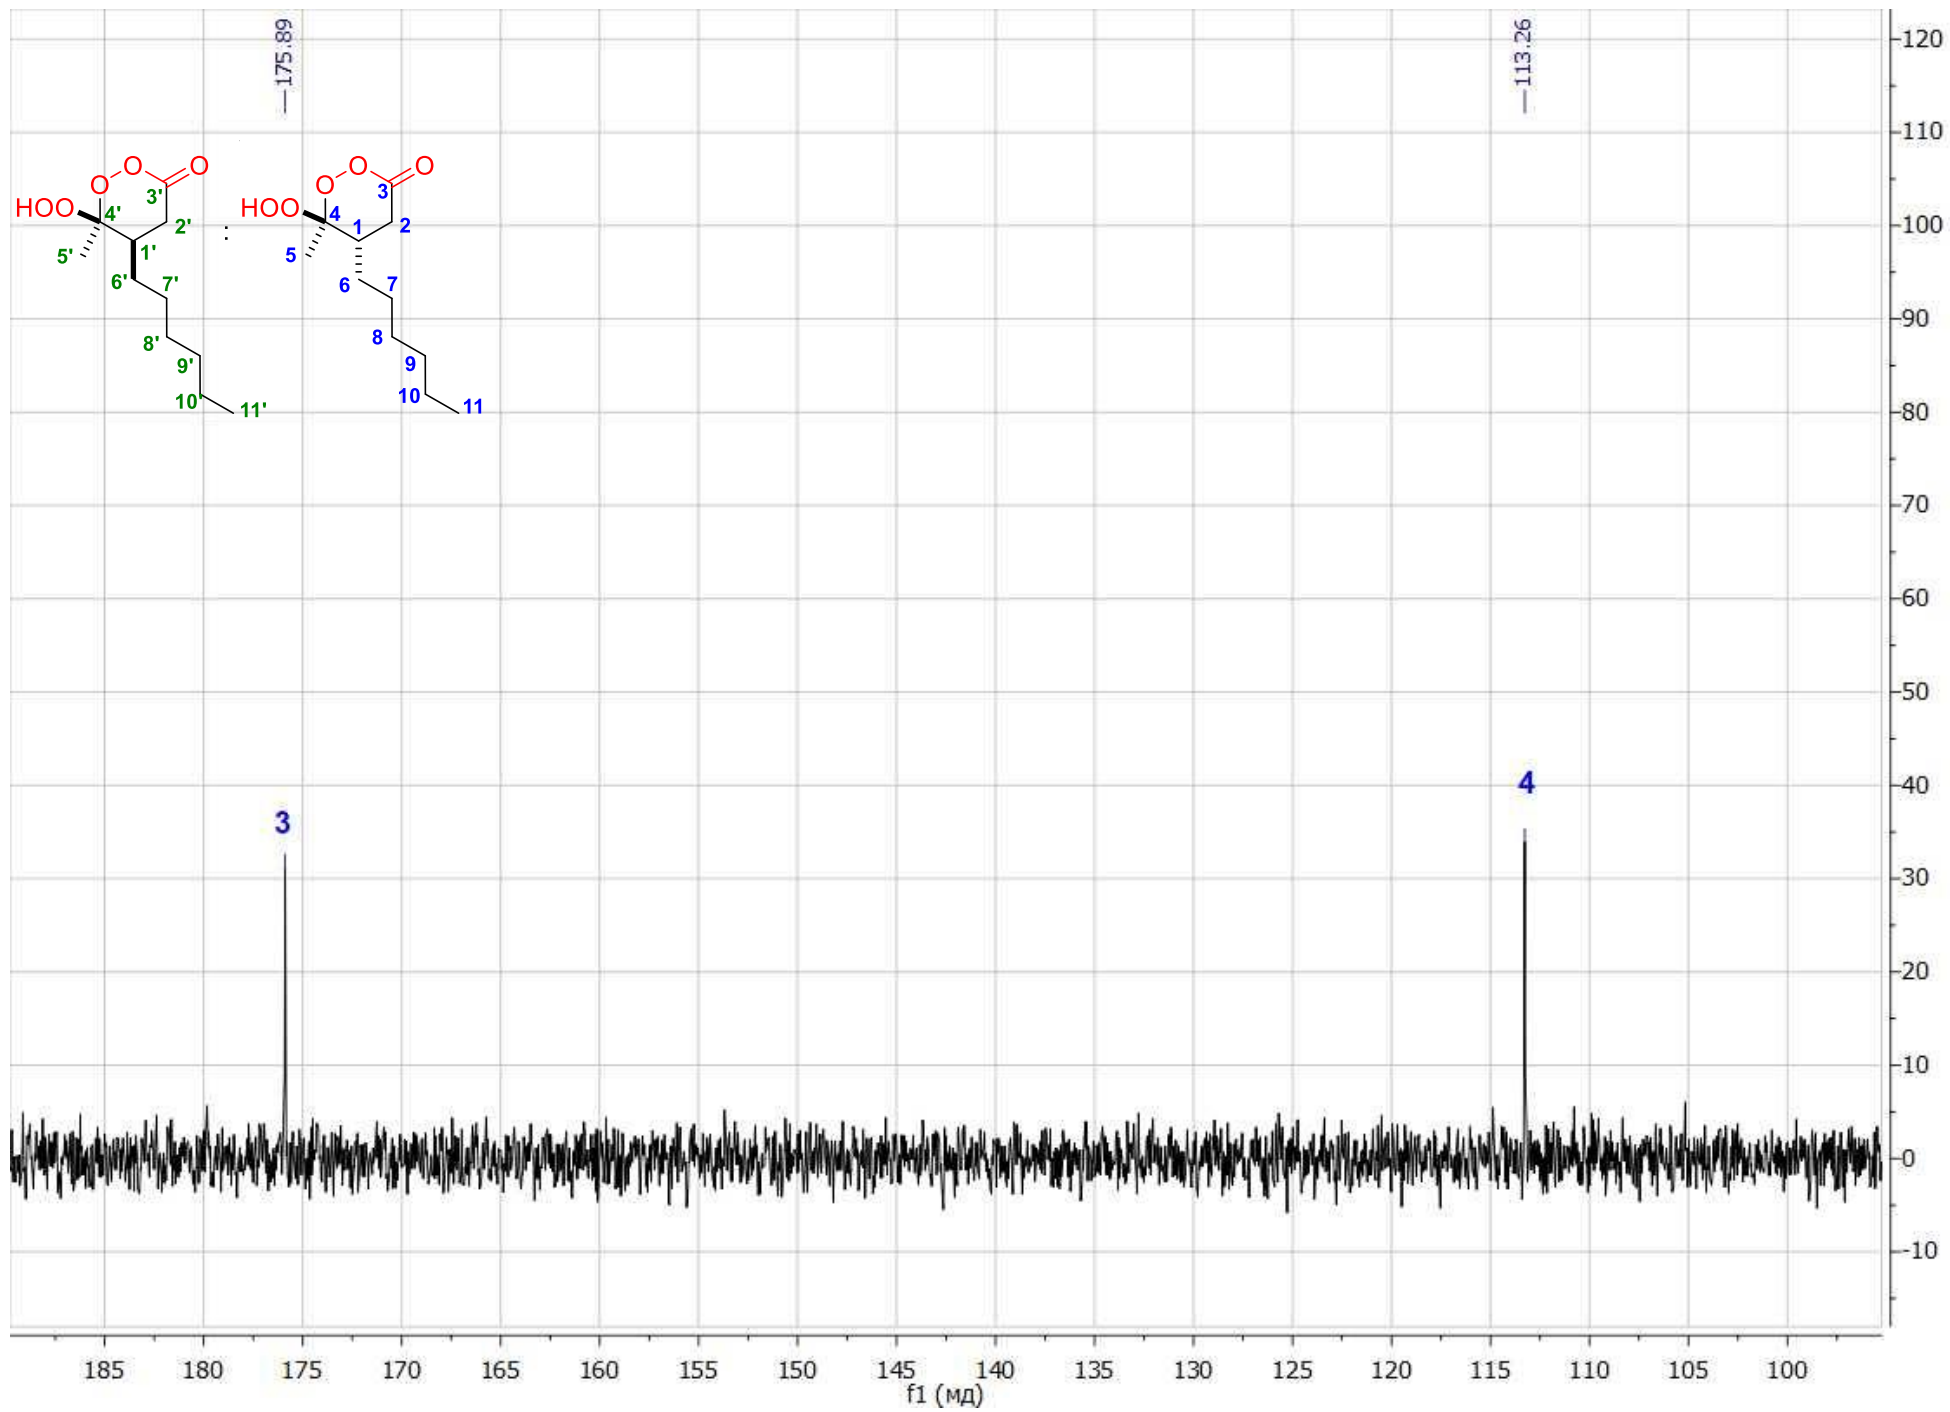

<sup>13</sup>C\_deptsp135

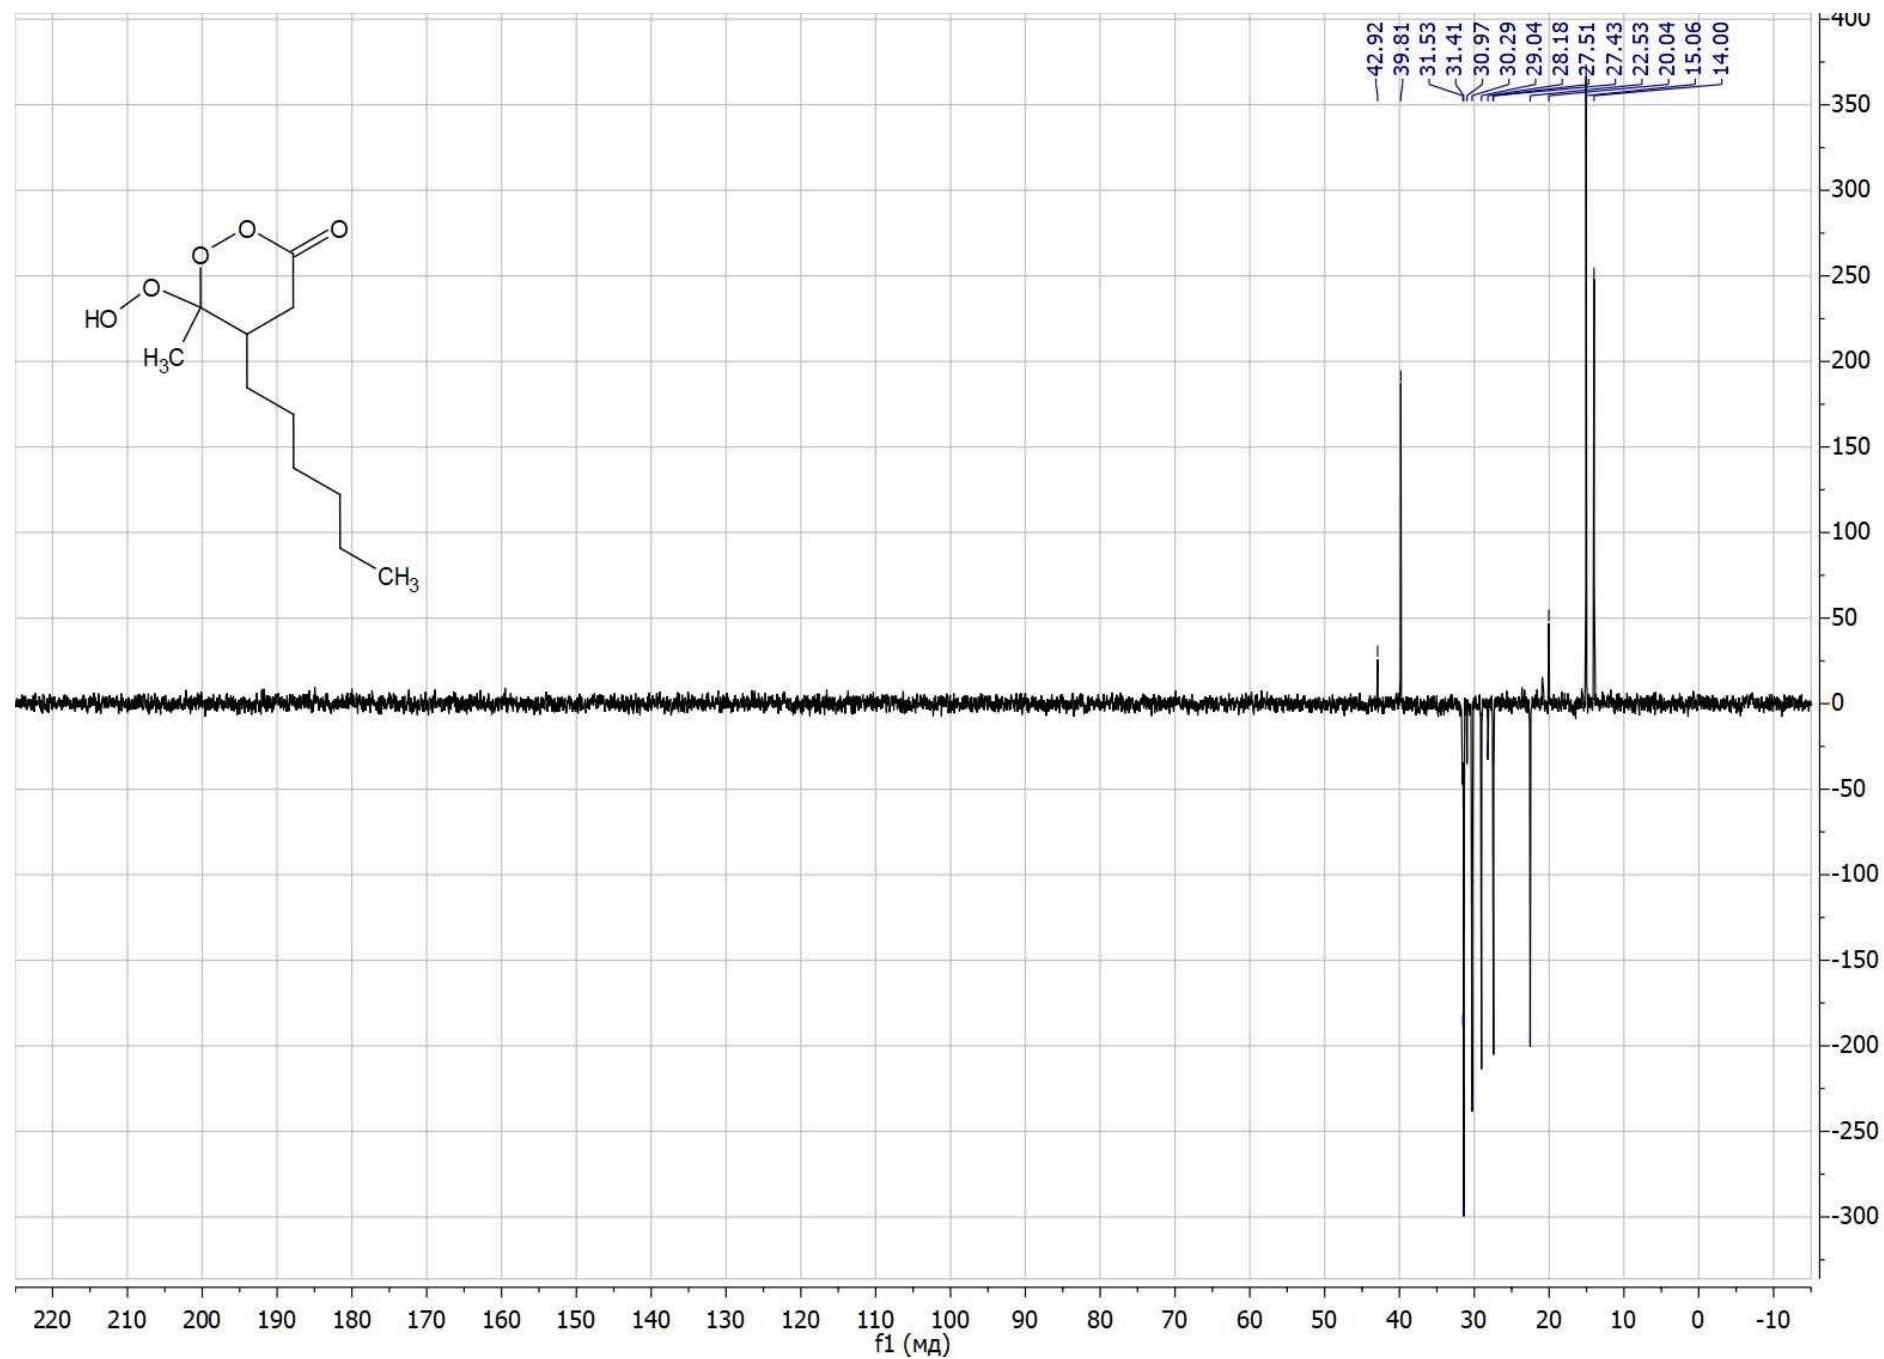

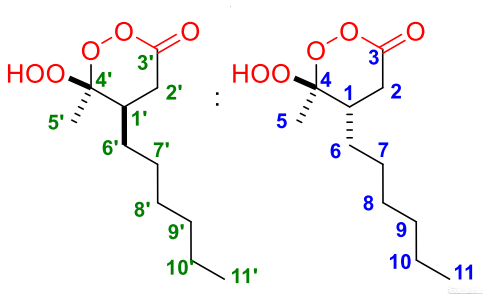

{<sup>1</sup>H-<sup>1</sup>H} COSY

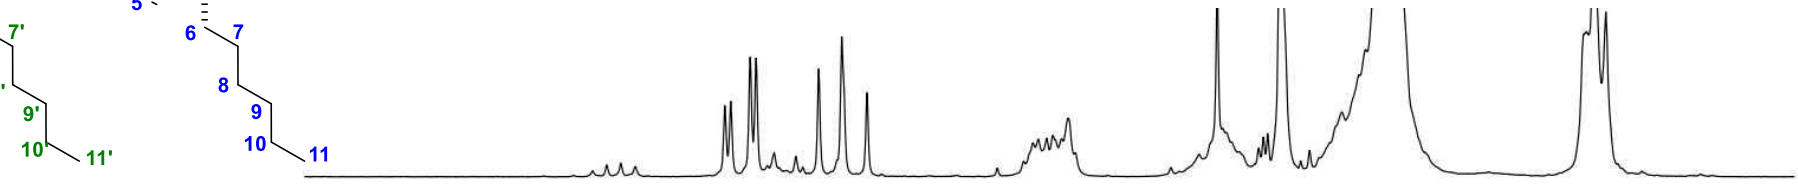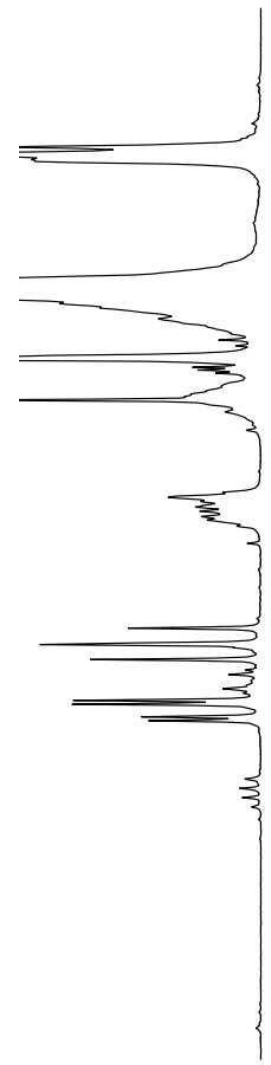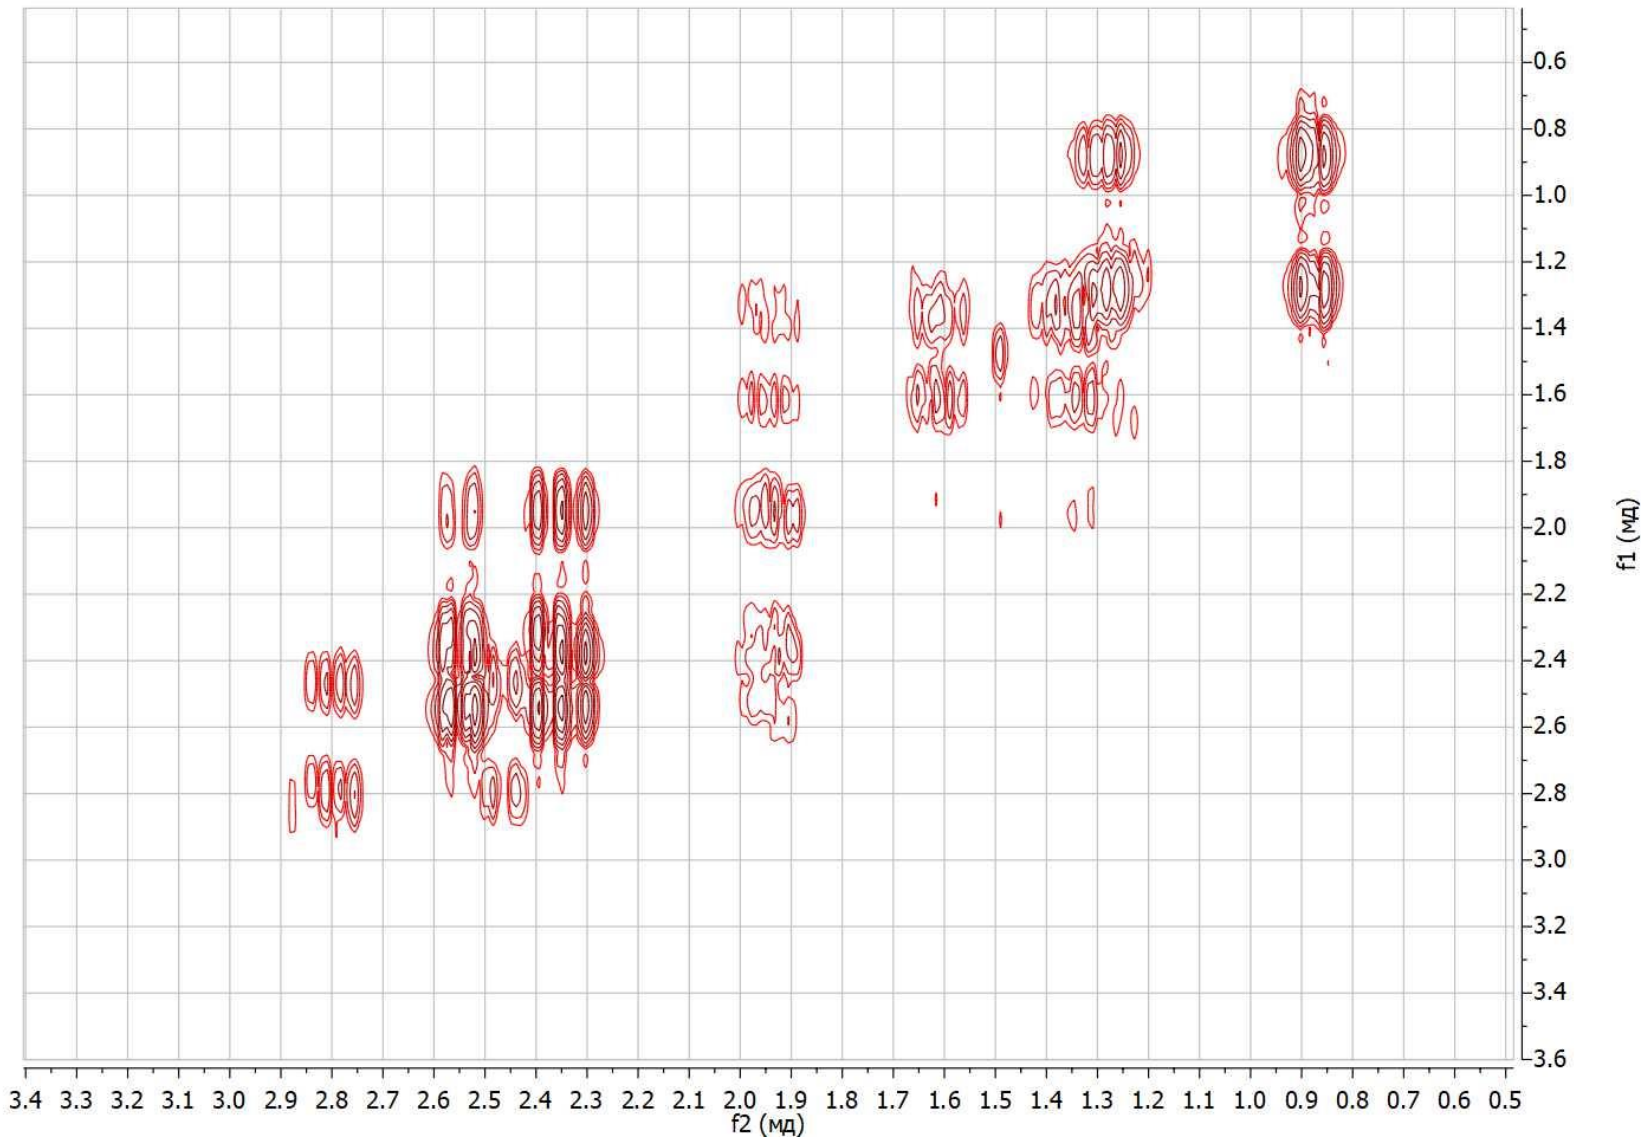



{<sup>1</sup>H-<sup>1</sup>H} NOESY

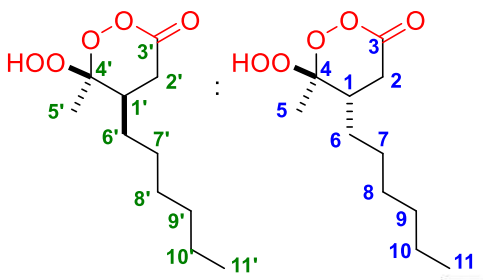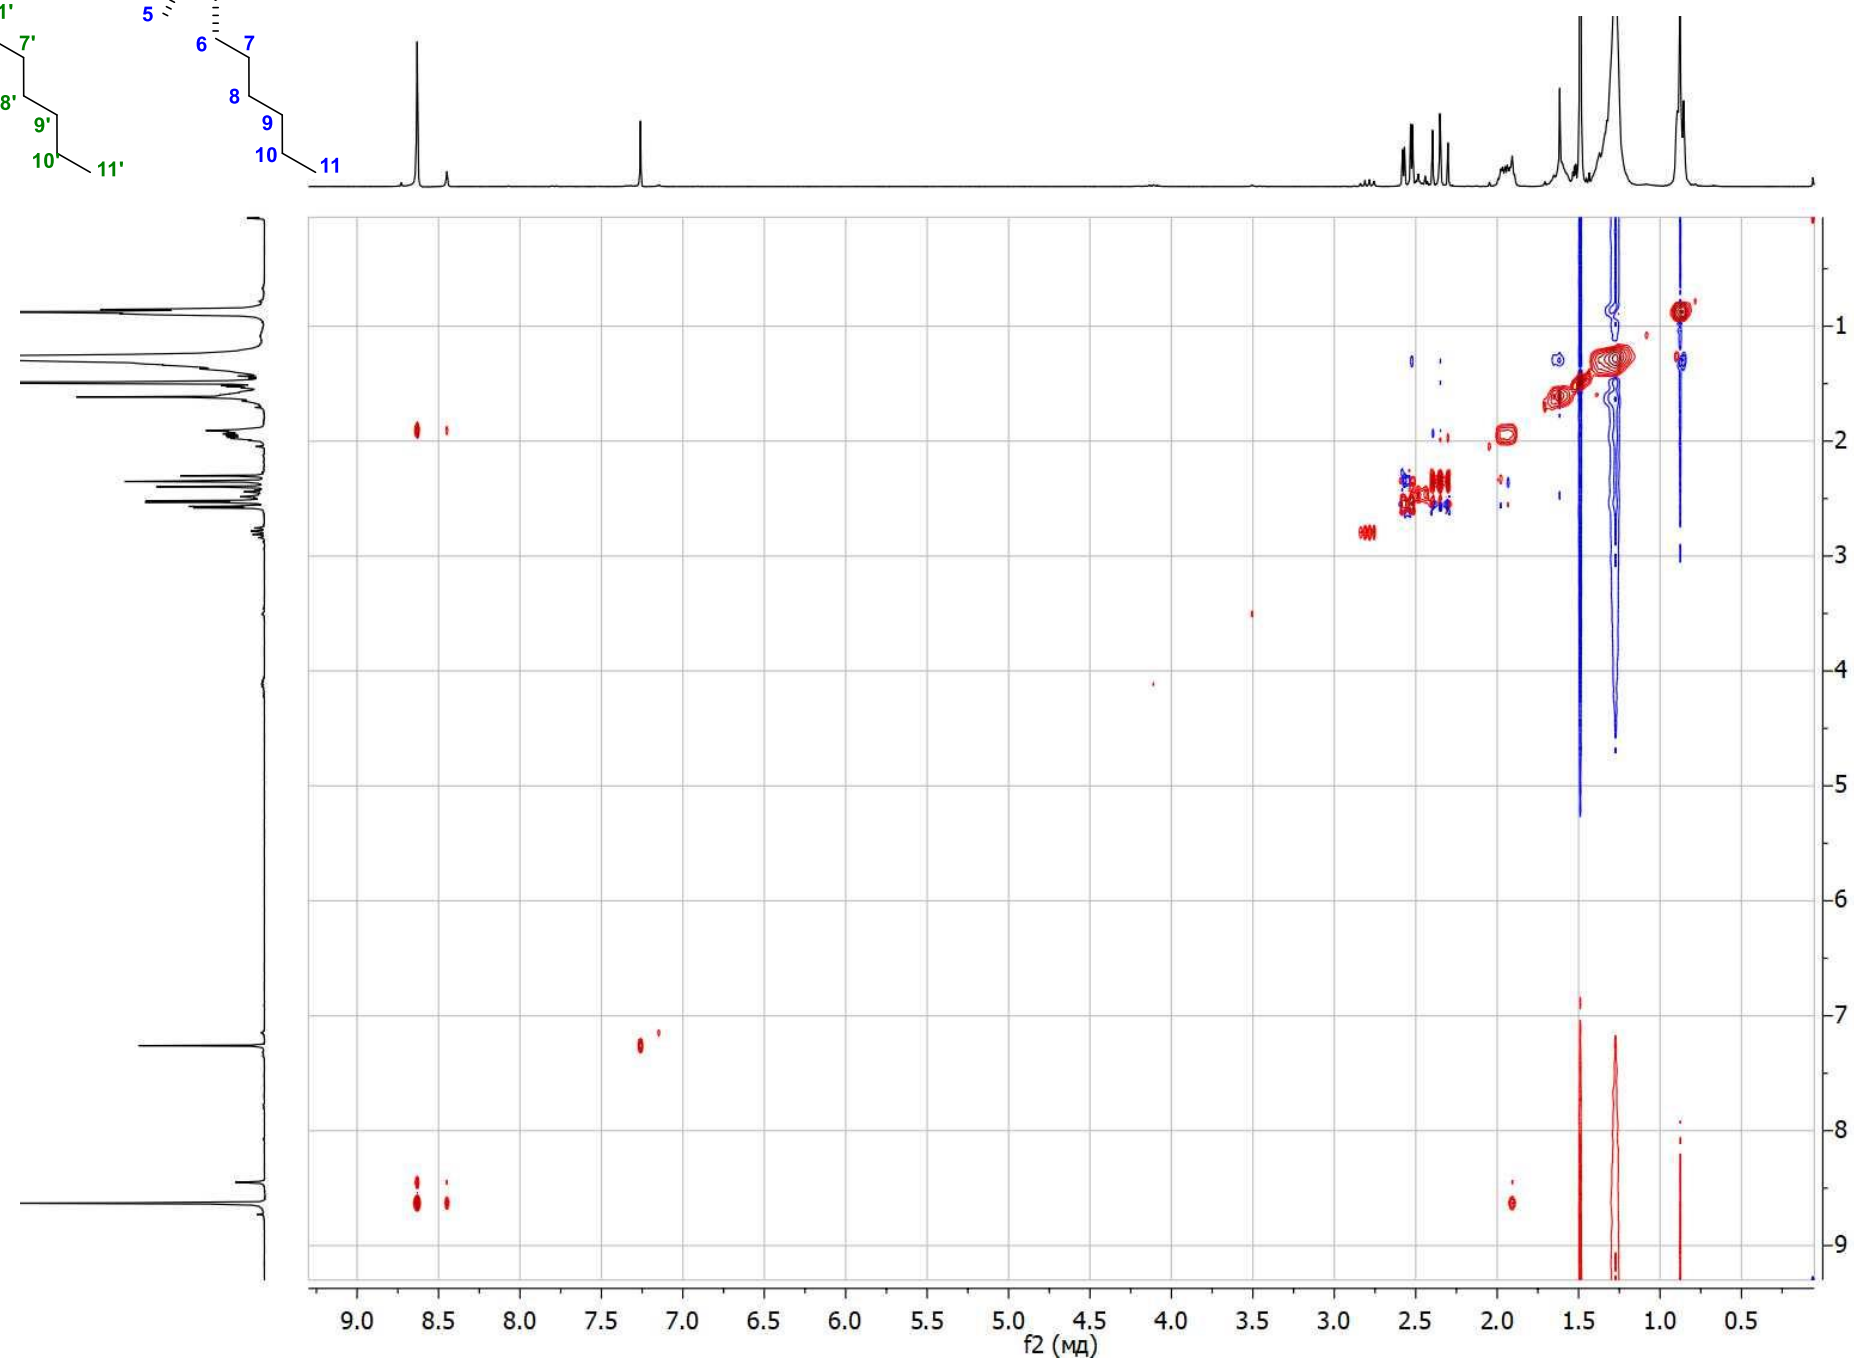

{<sup>1</sup>H-<sup>13</sup>C} HSQC

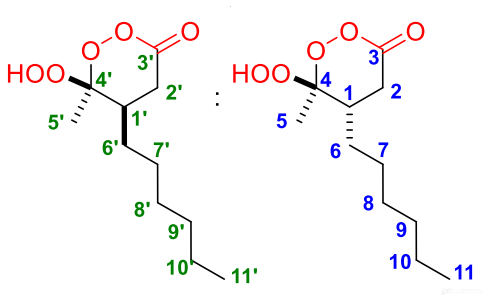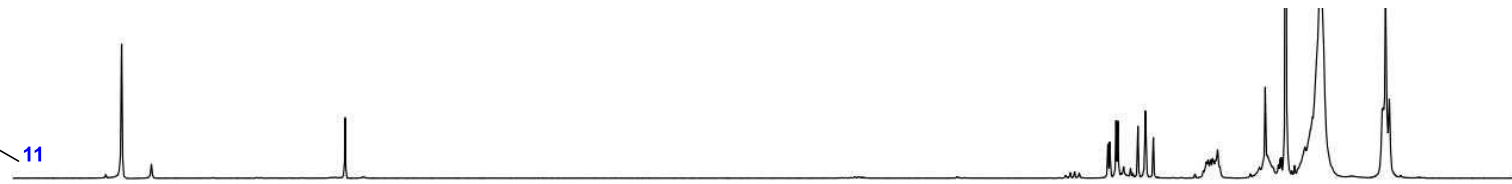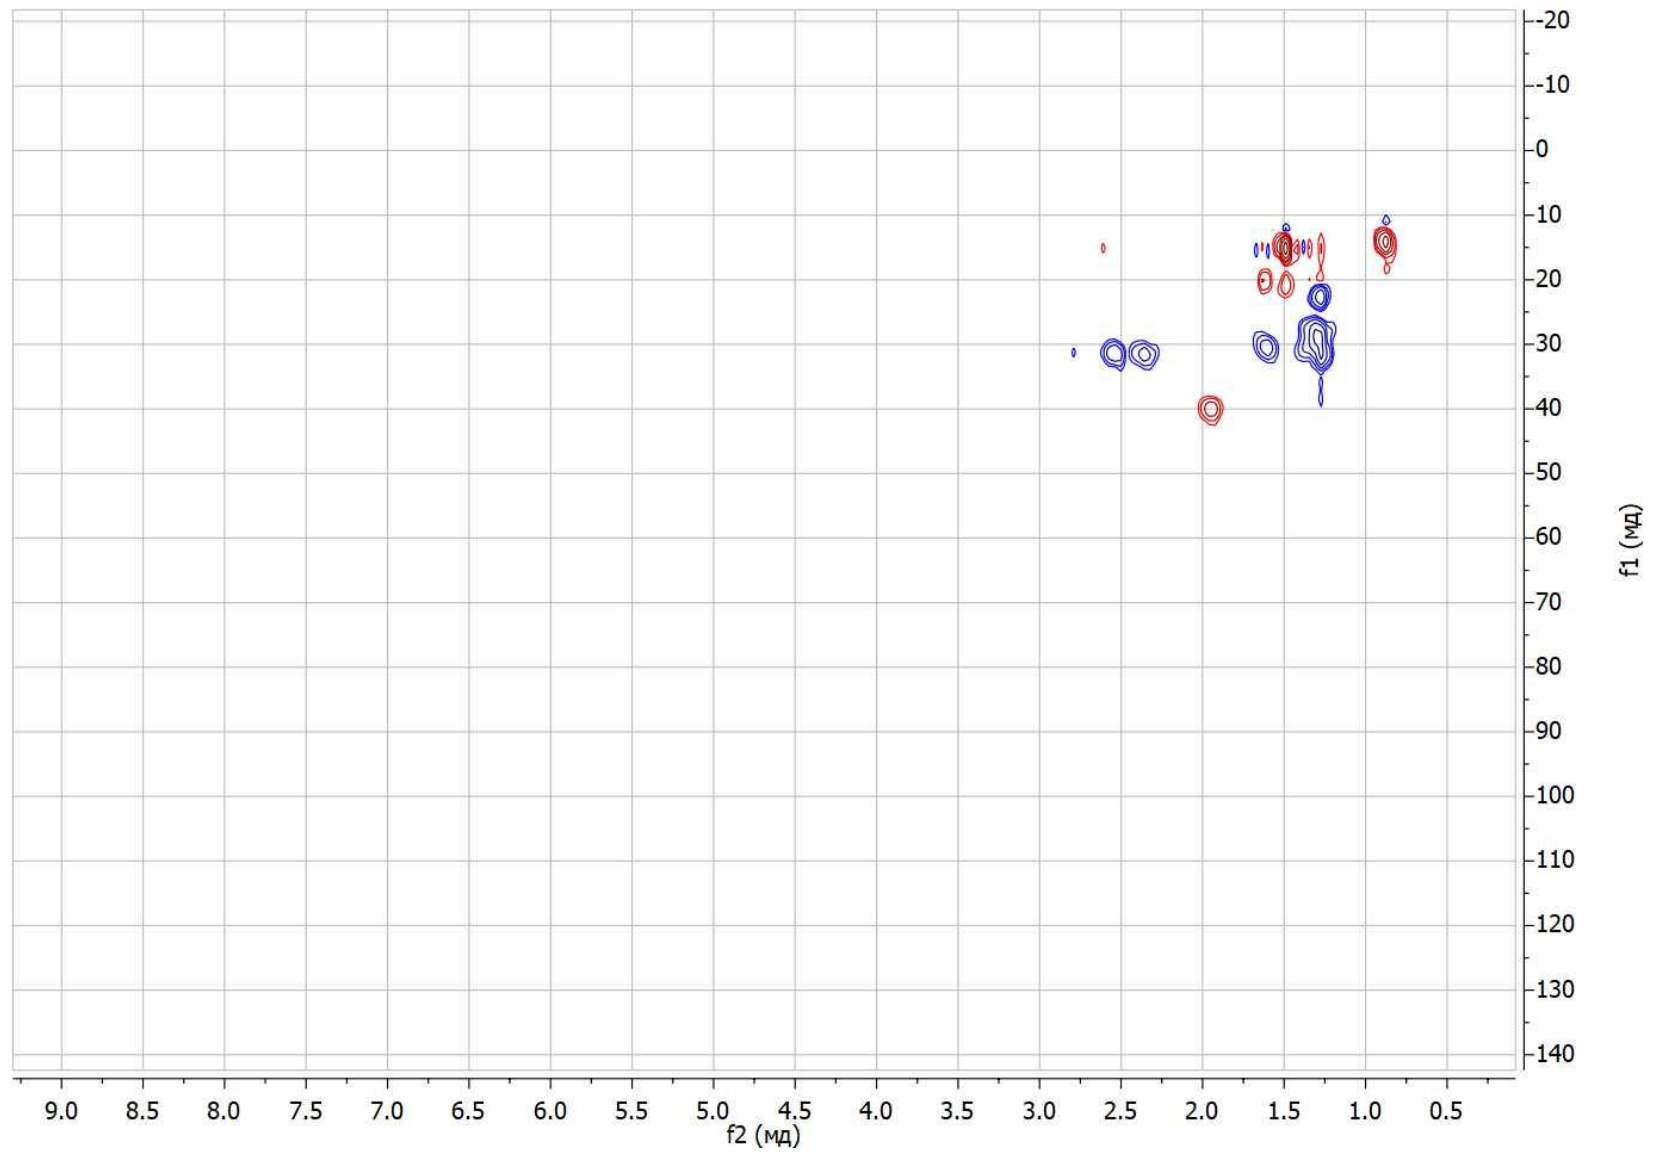

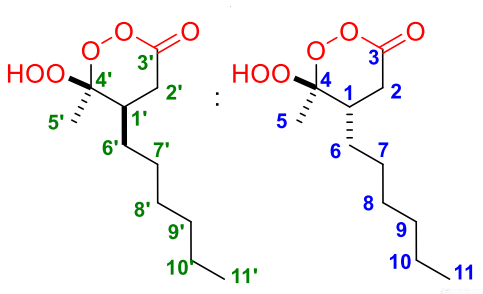

{<sup>1</sup>H-<sup>13</sup>C} HMBC

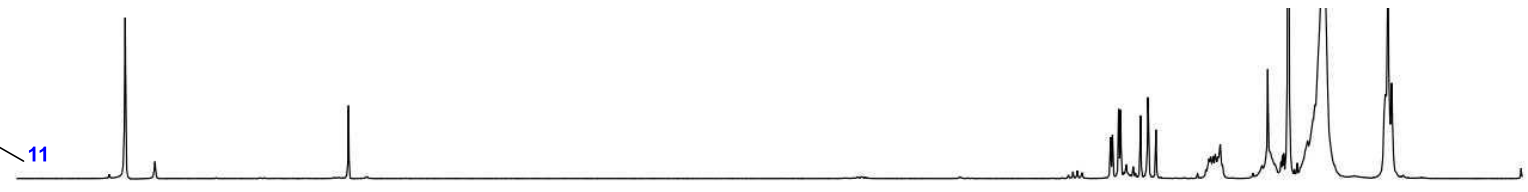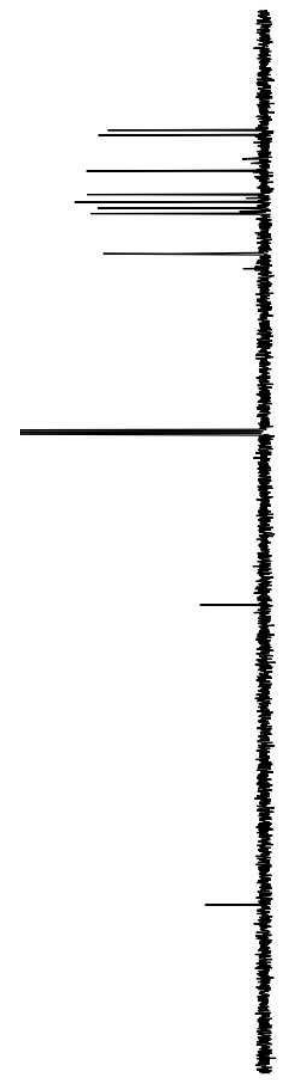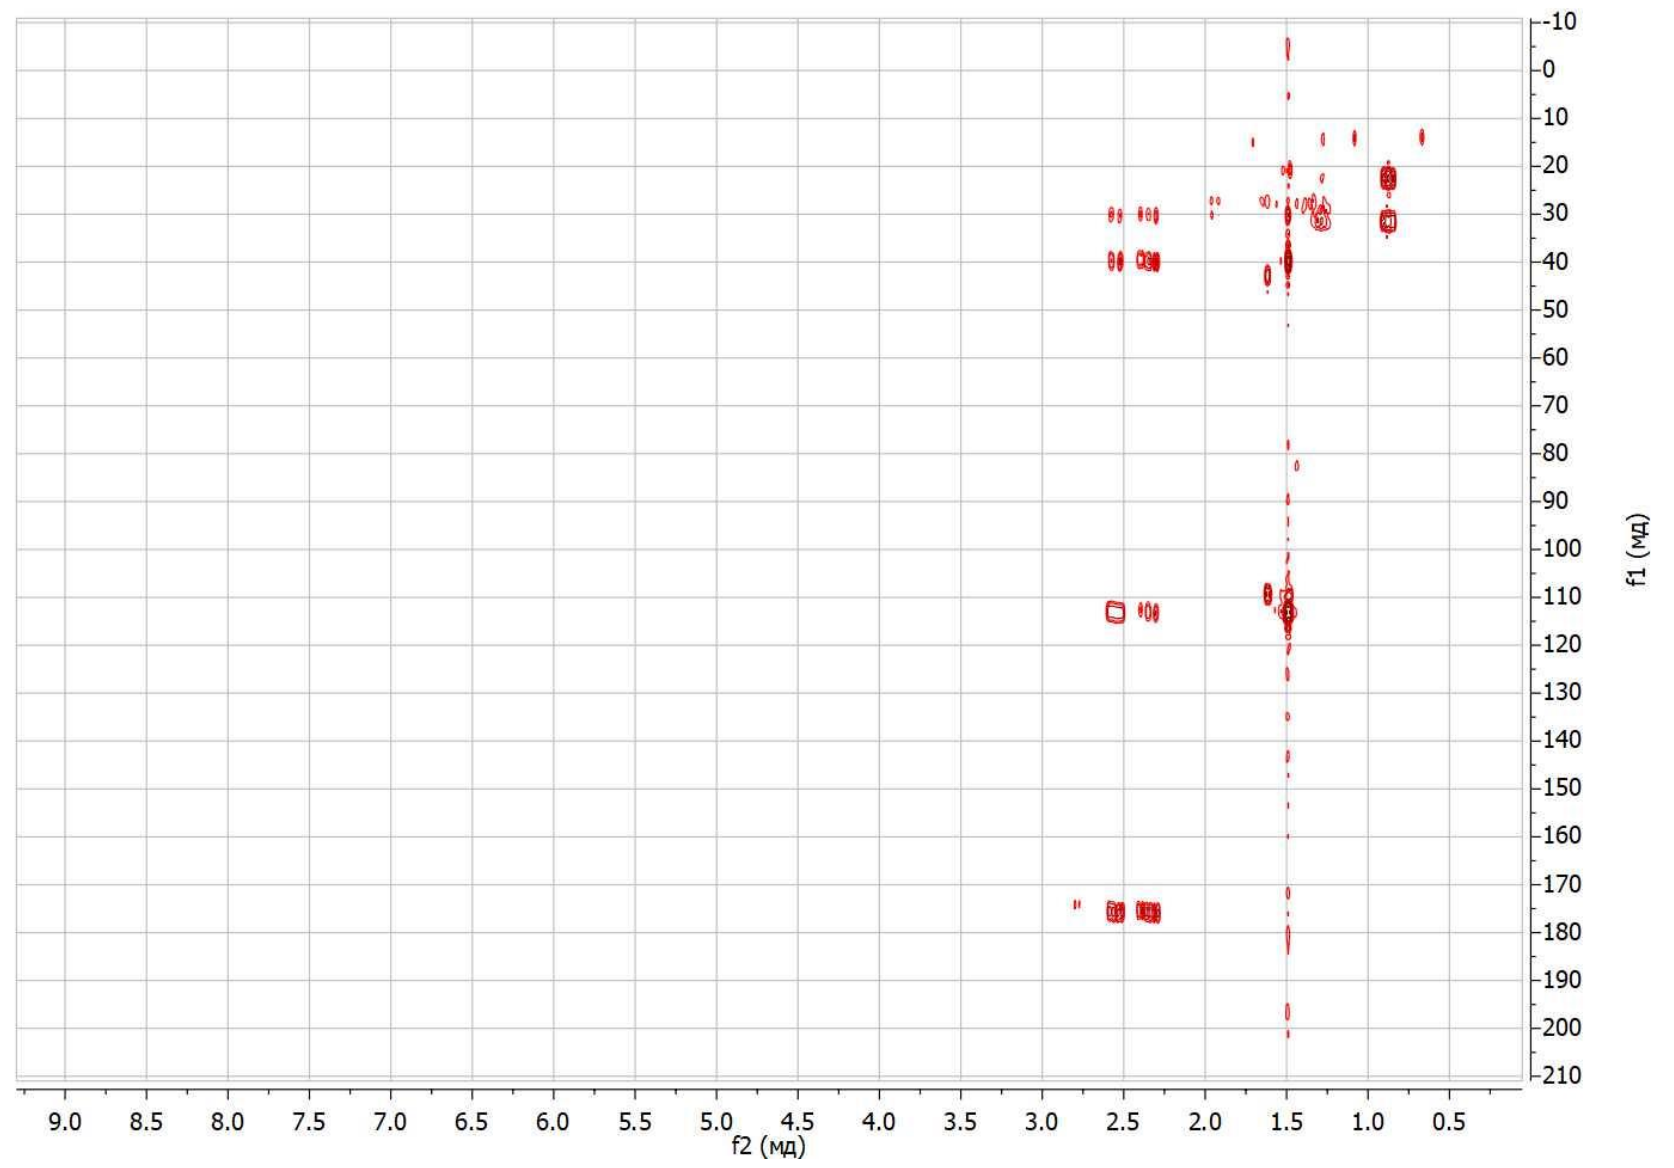

# 6-Hydroperoxy-6-methyl-5-octyl-1,2-dioxan-3-one, 2l

## <sup>1</sup>H NMR

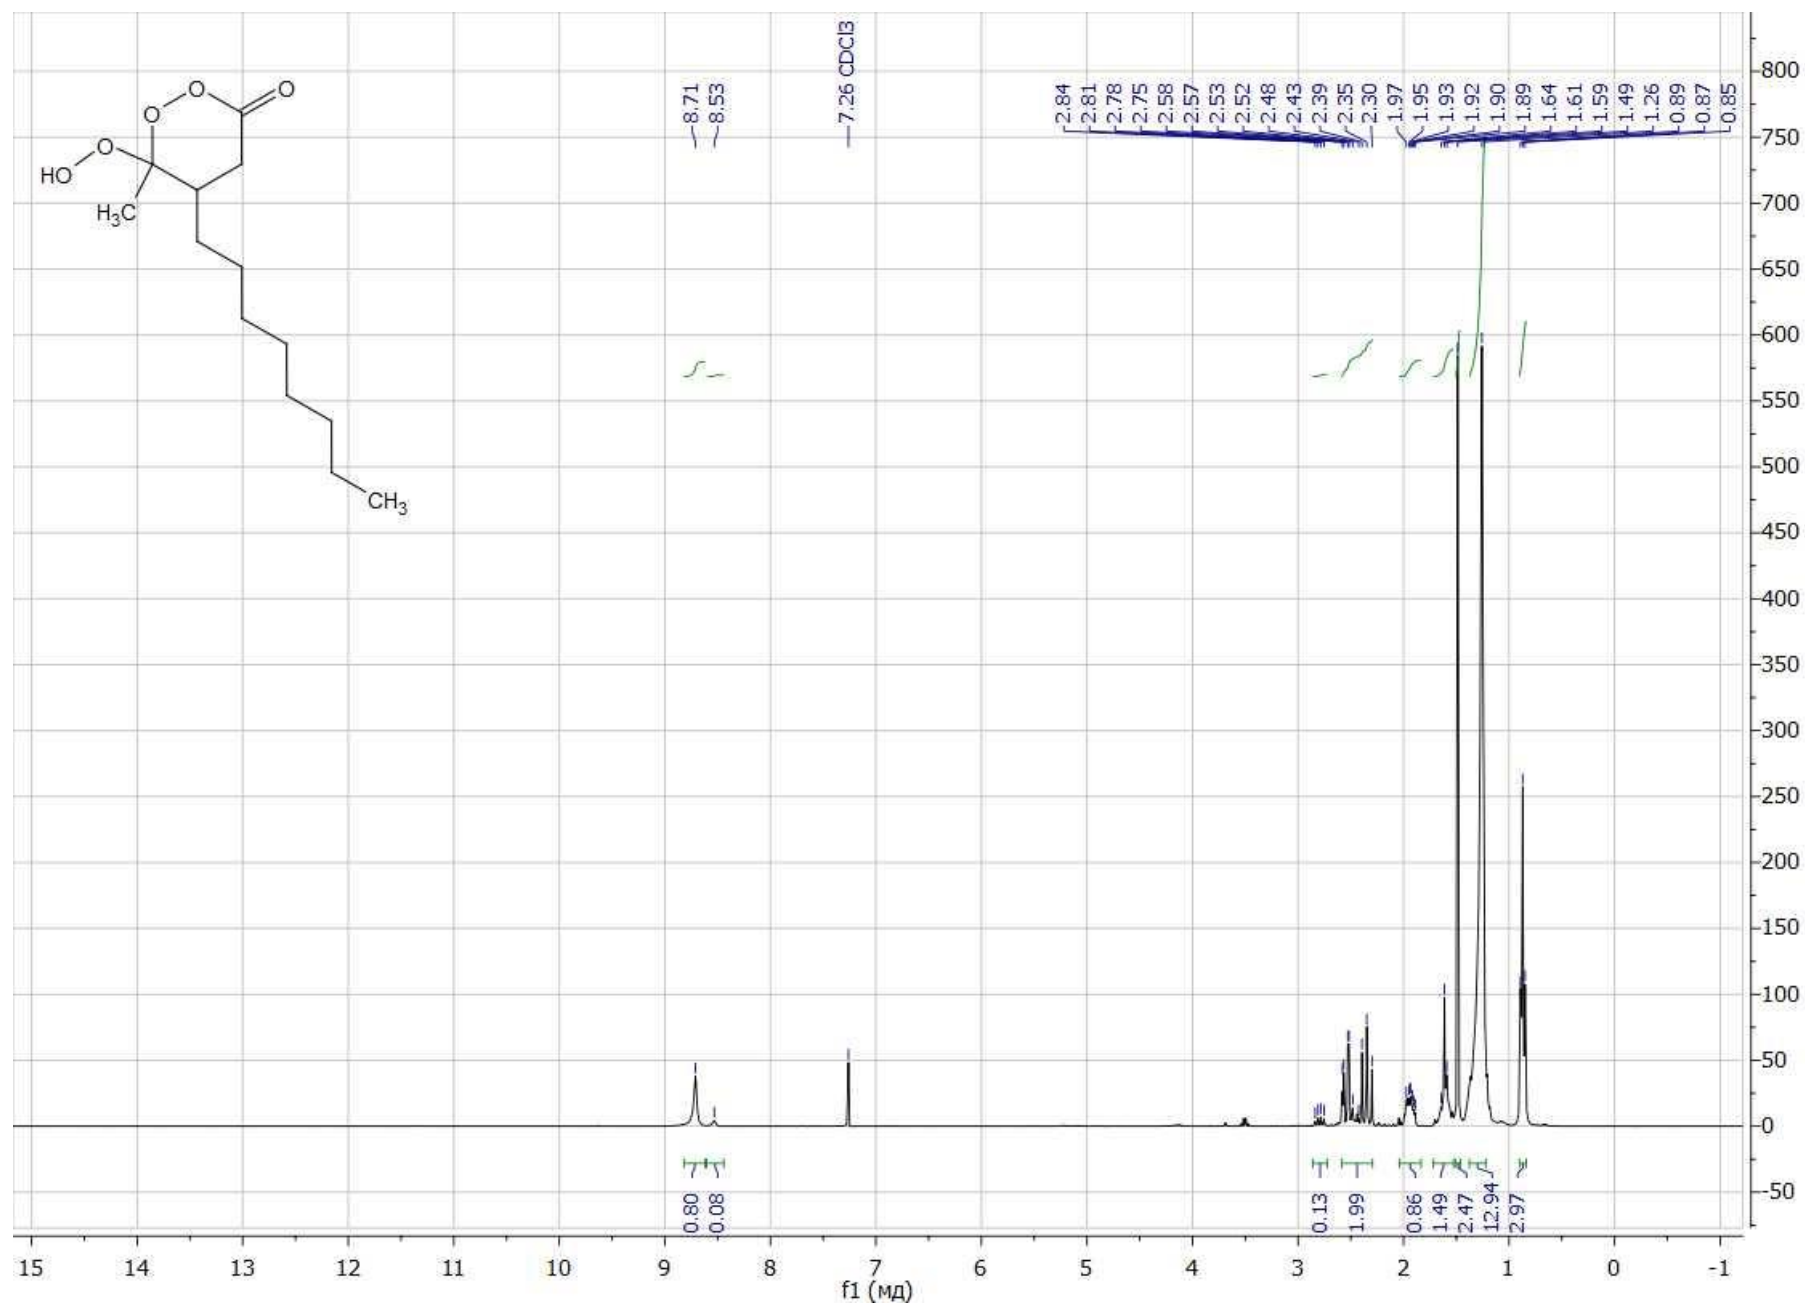

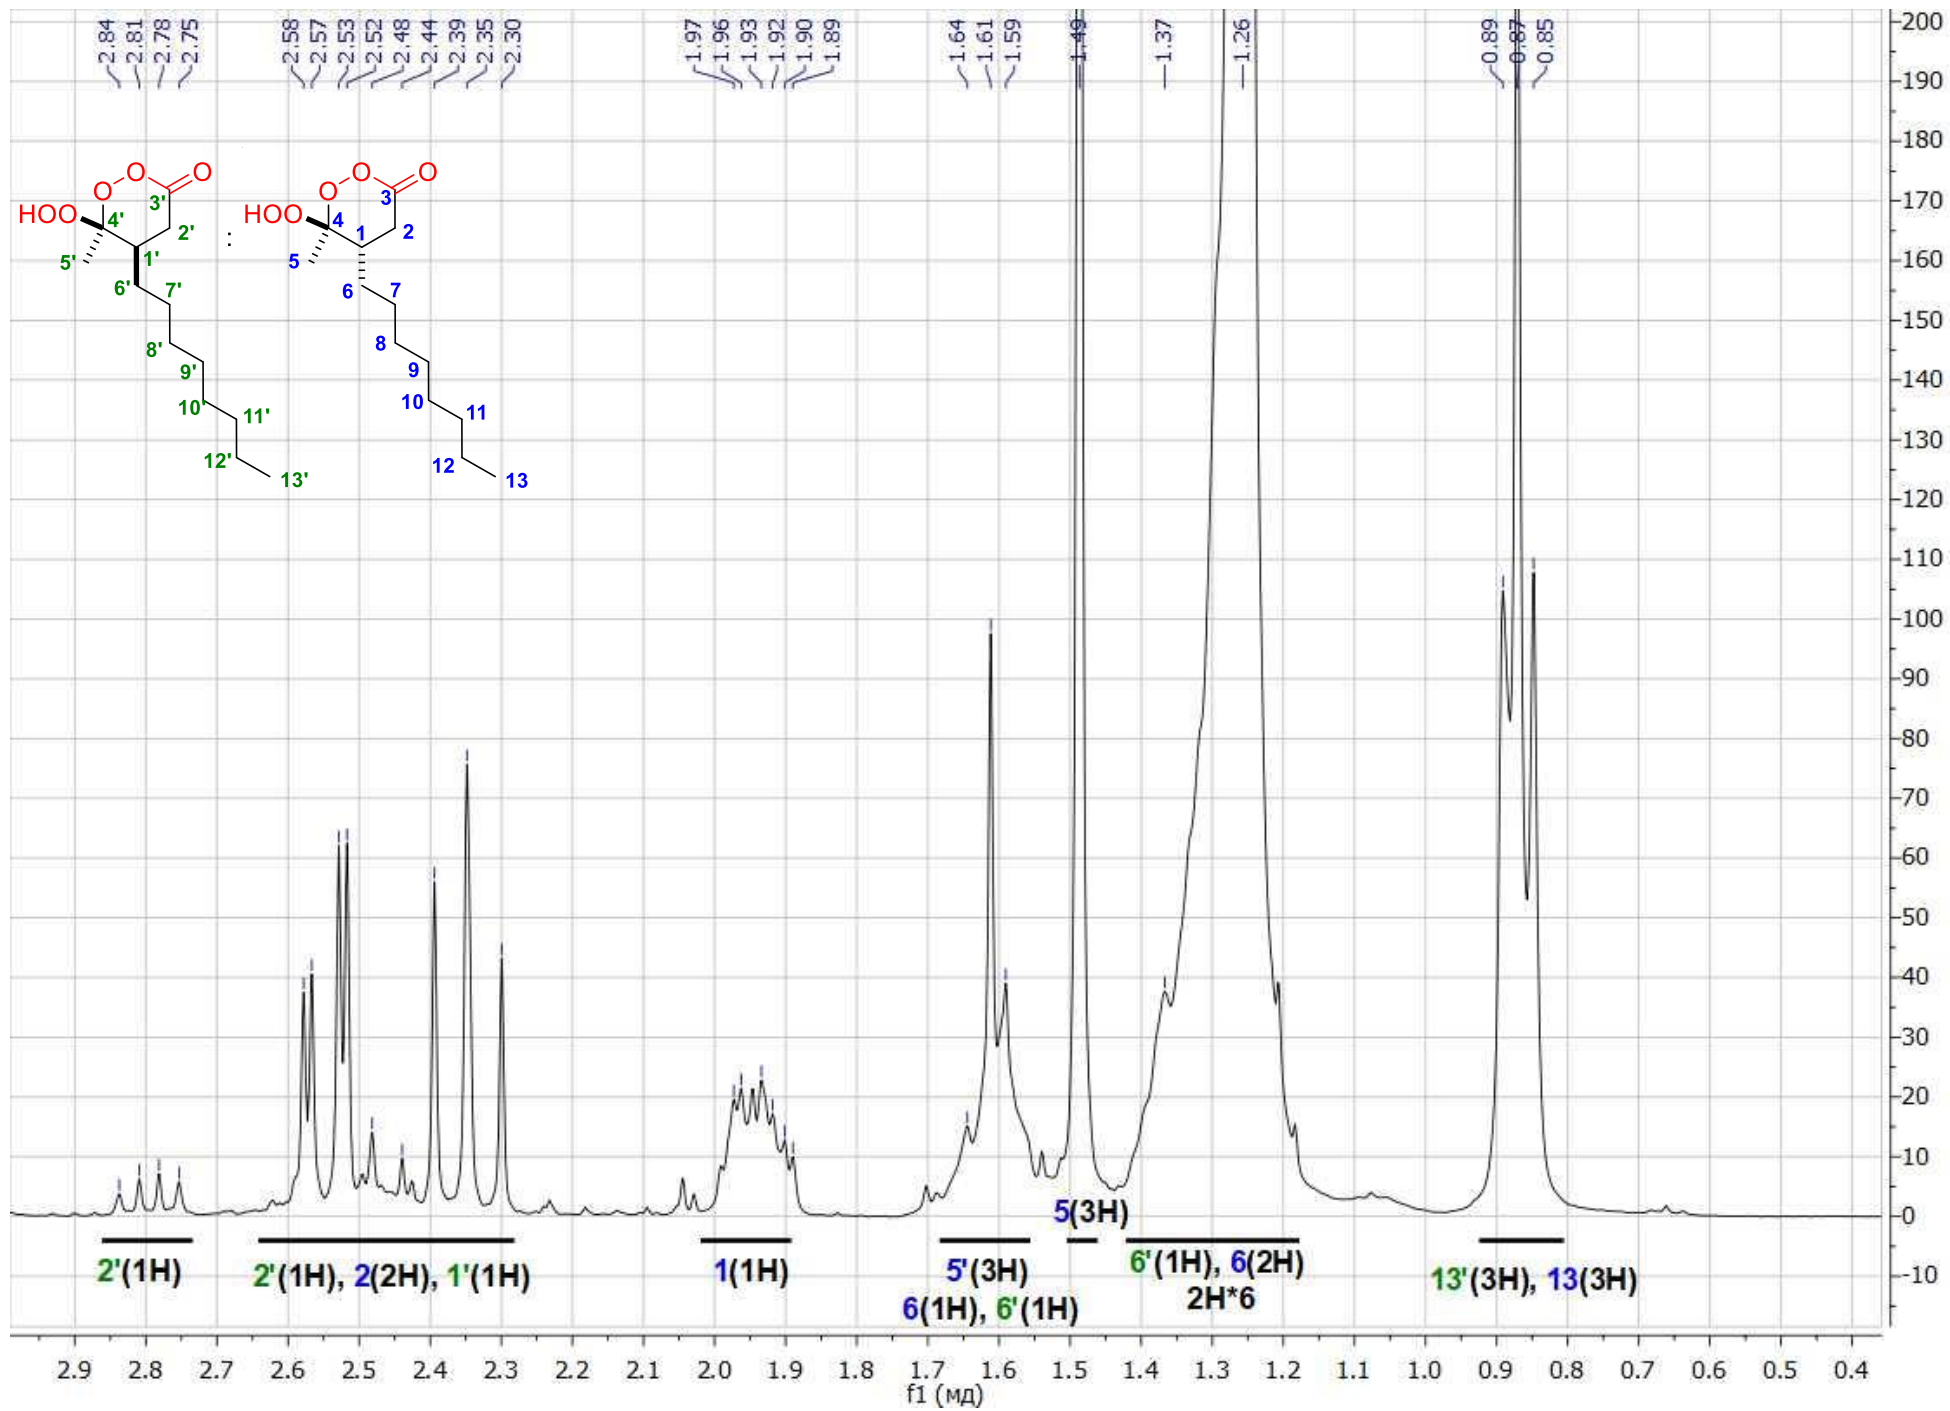

<sup>13</sup>C NMR

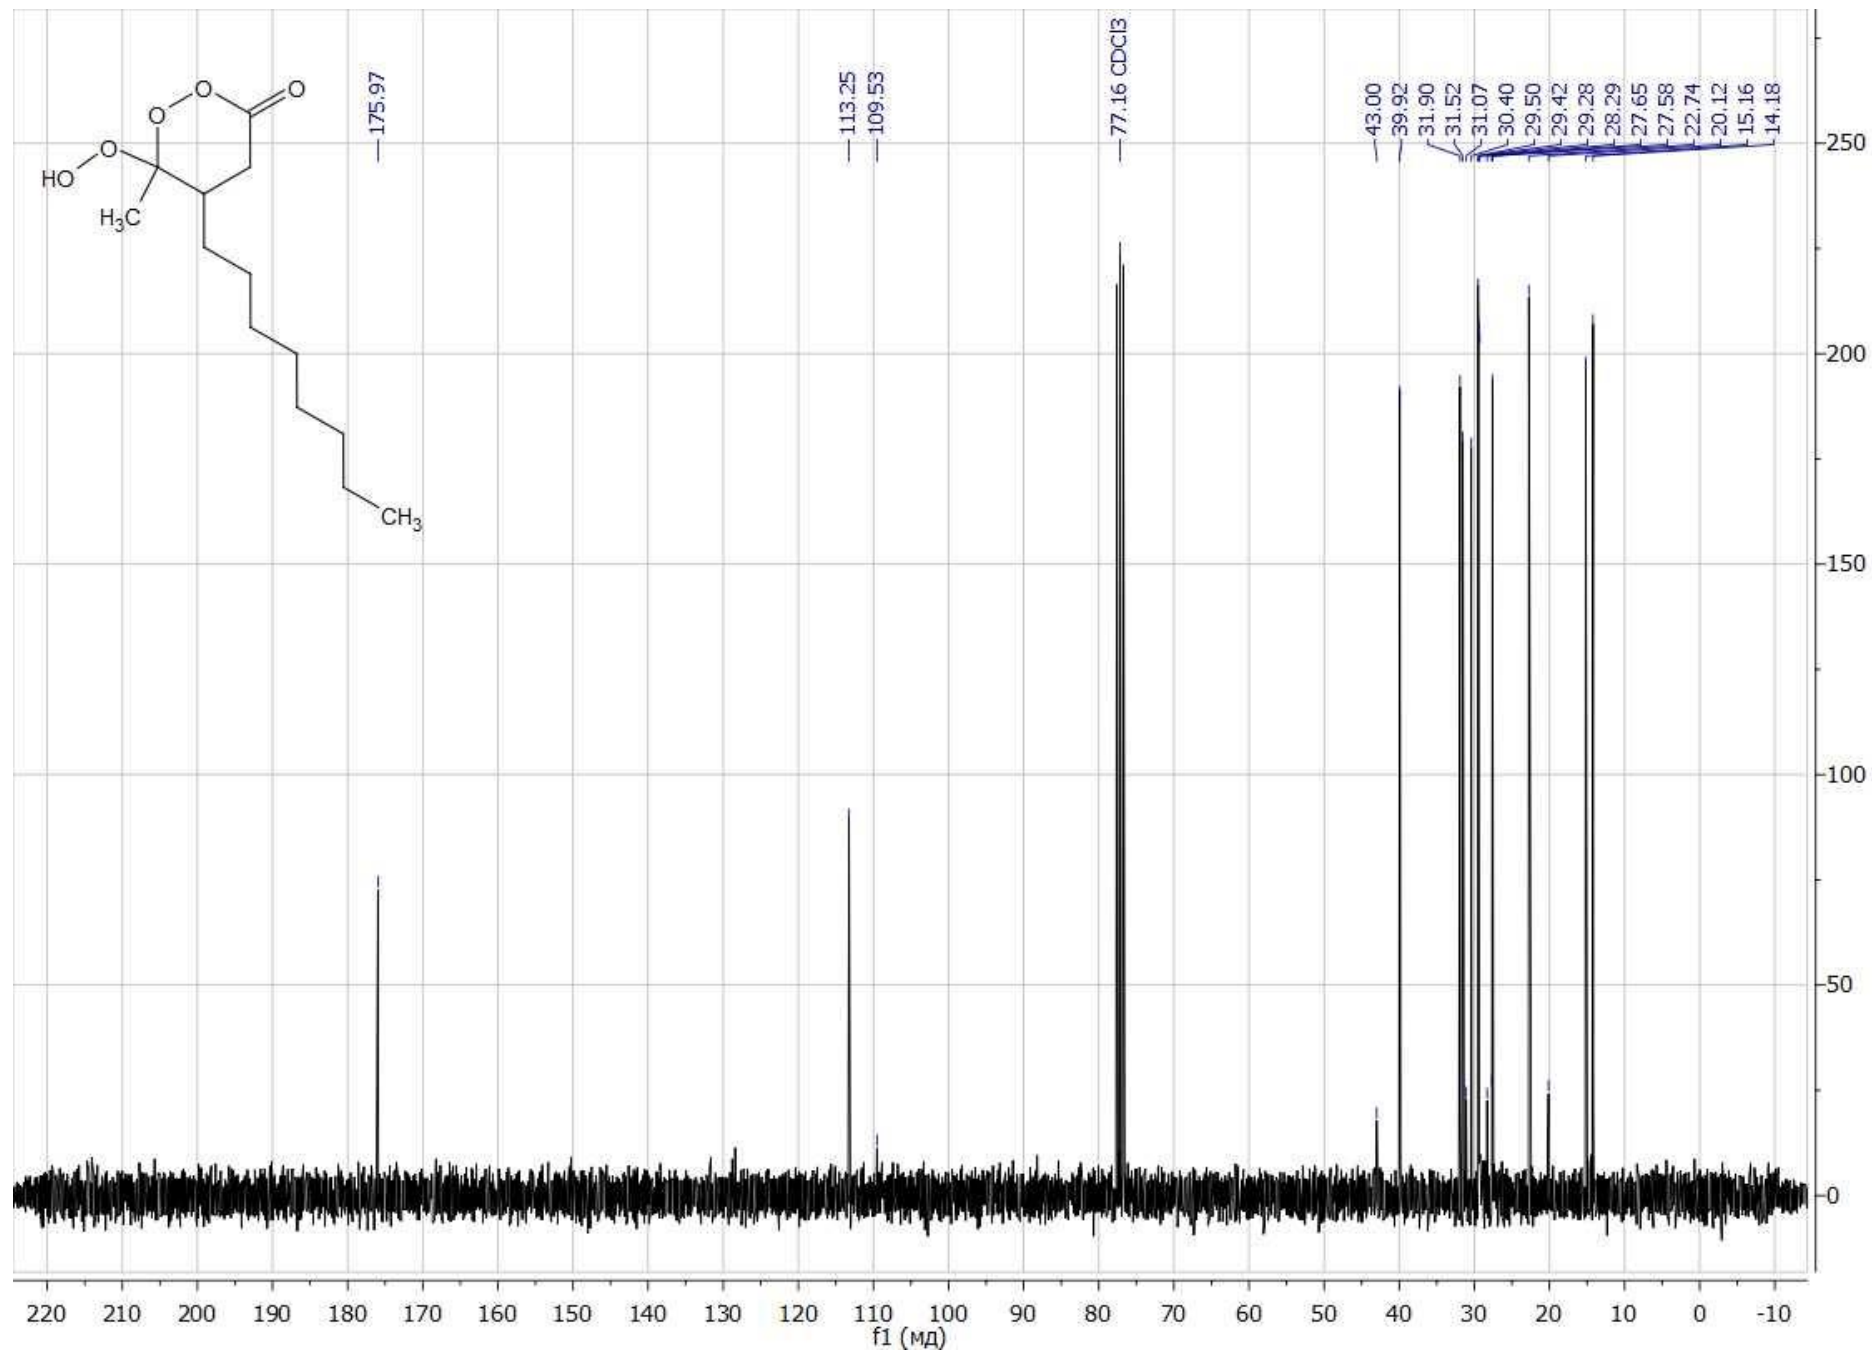

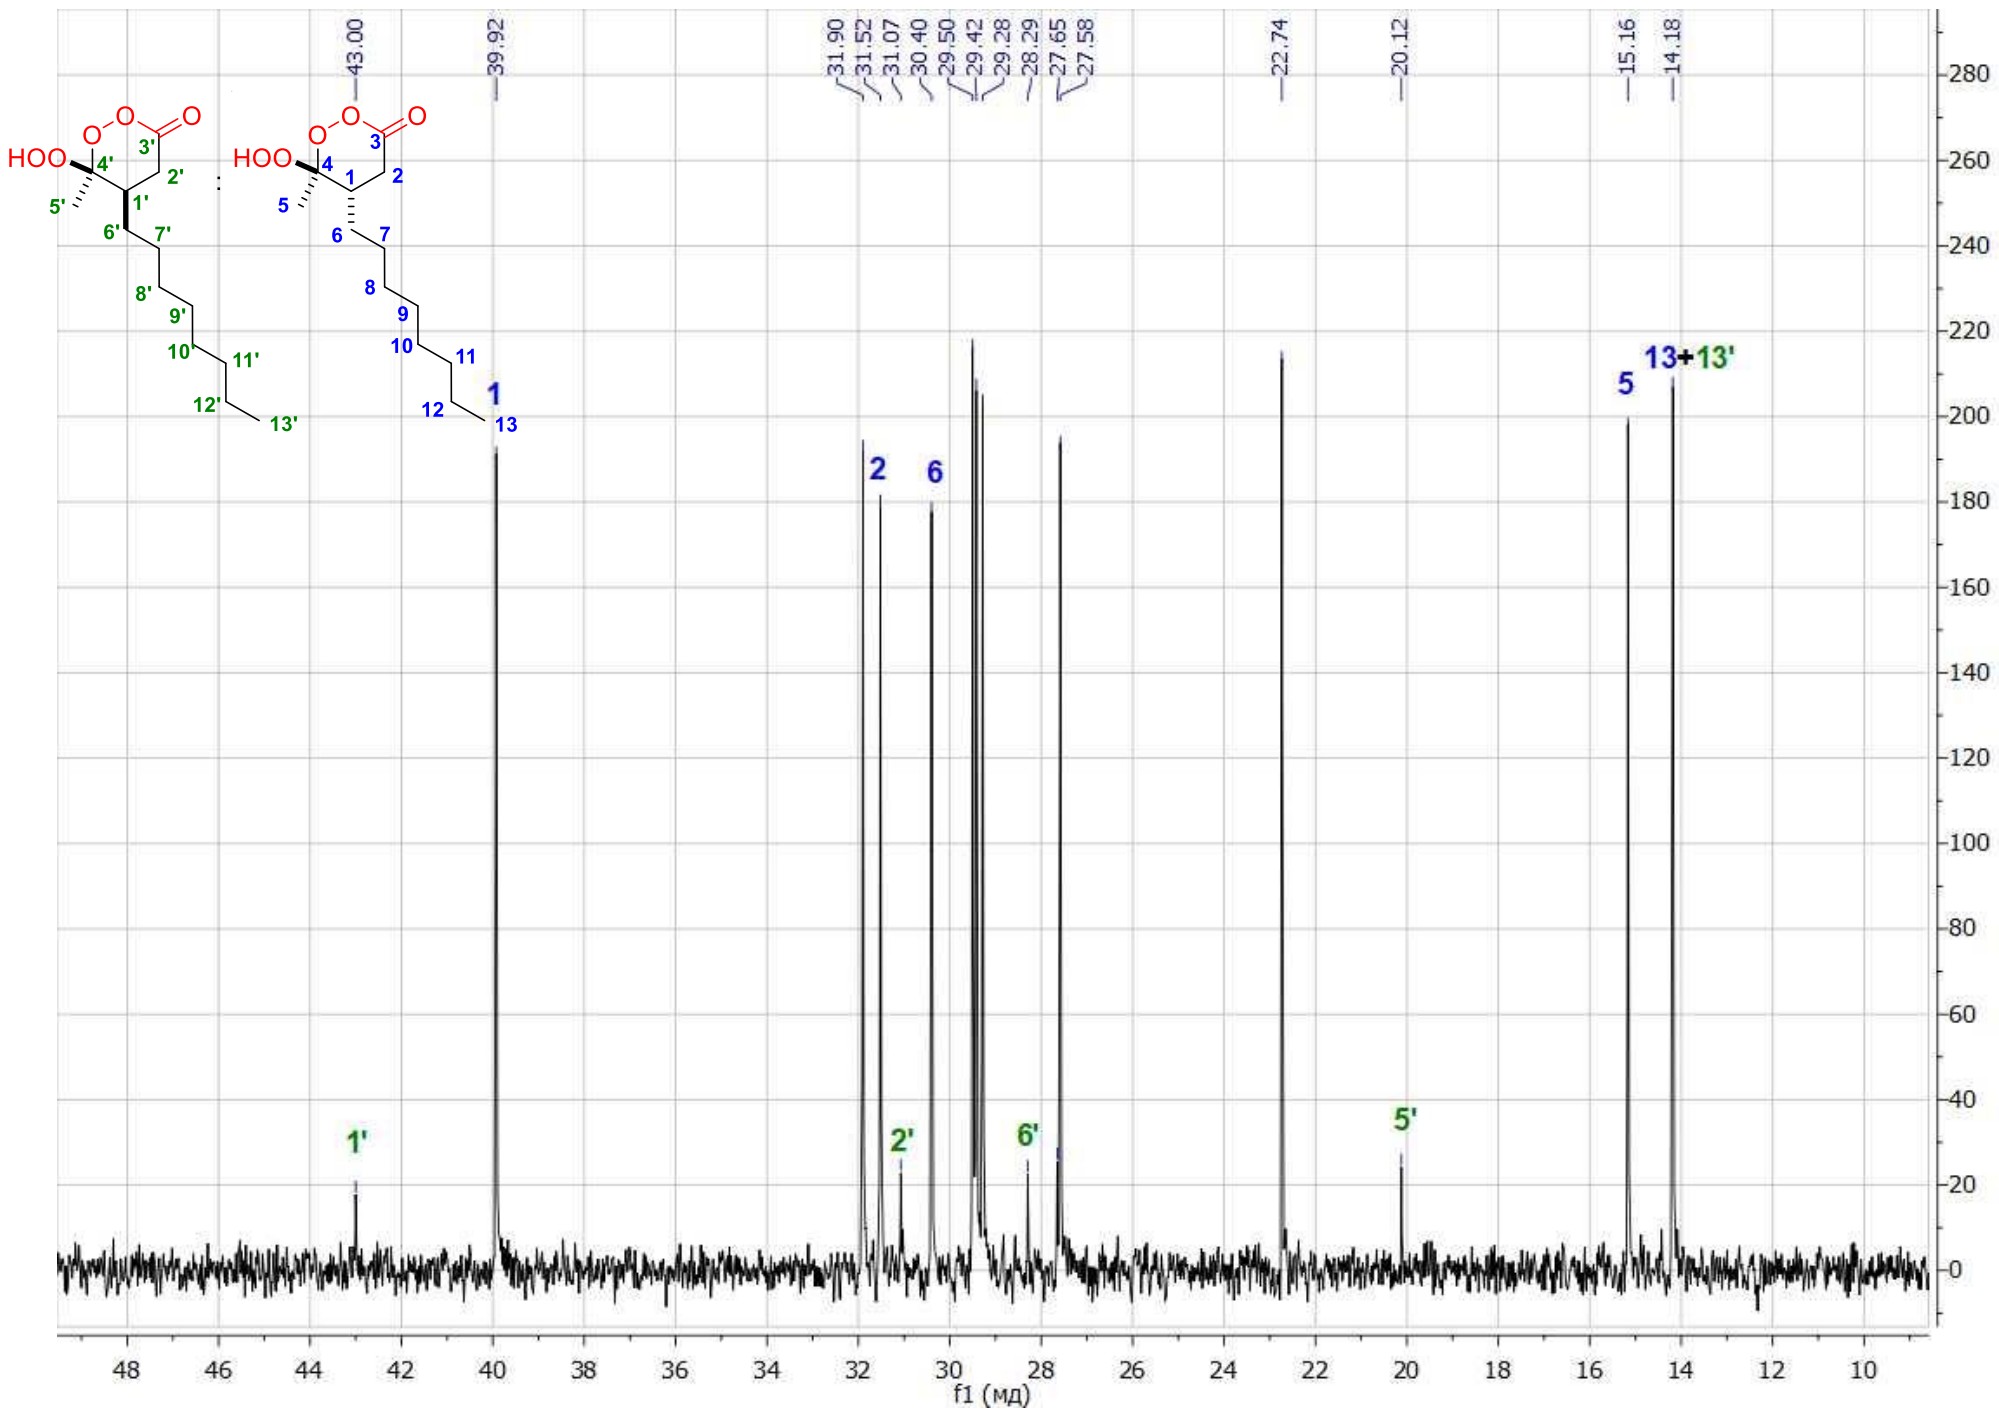

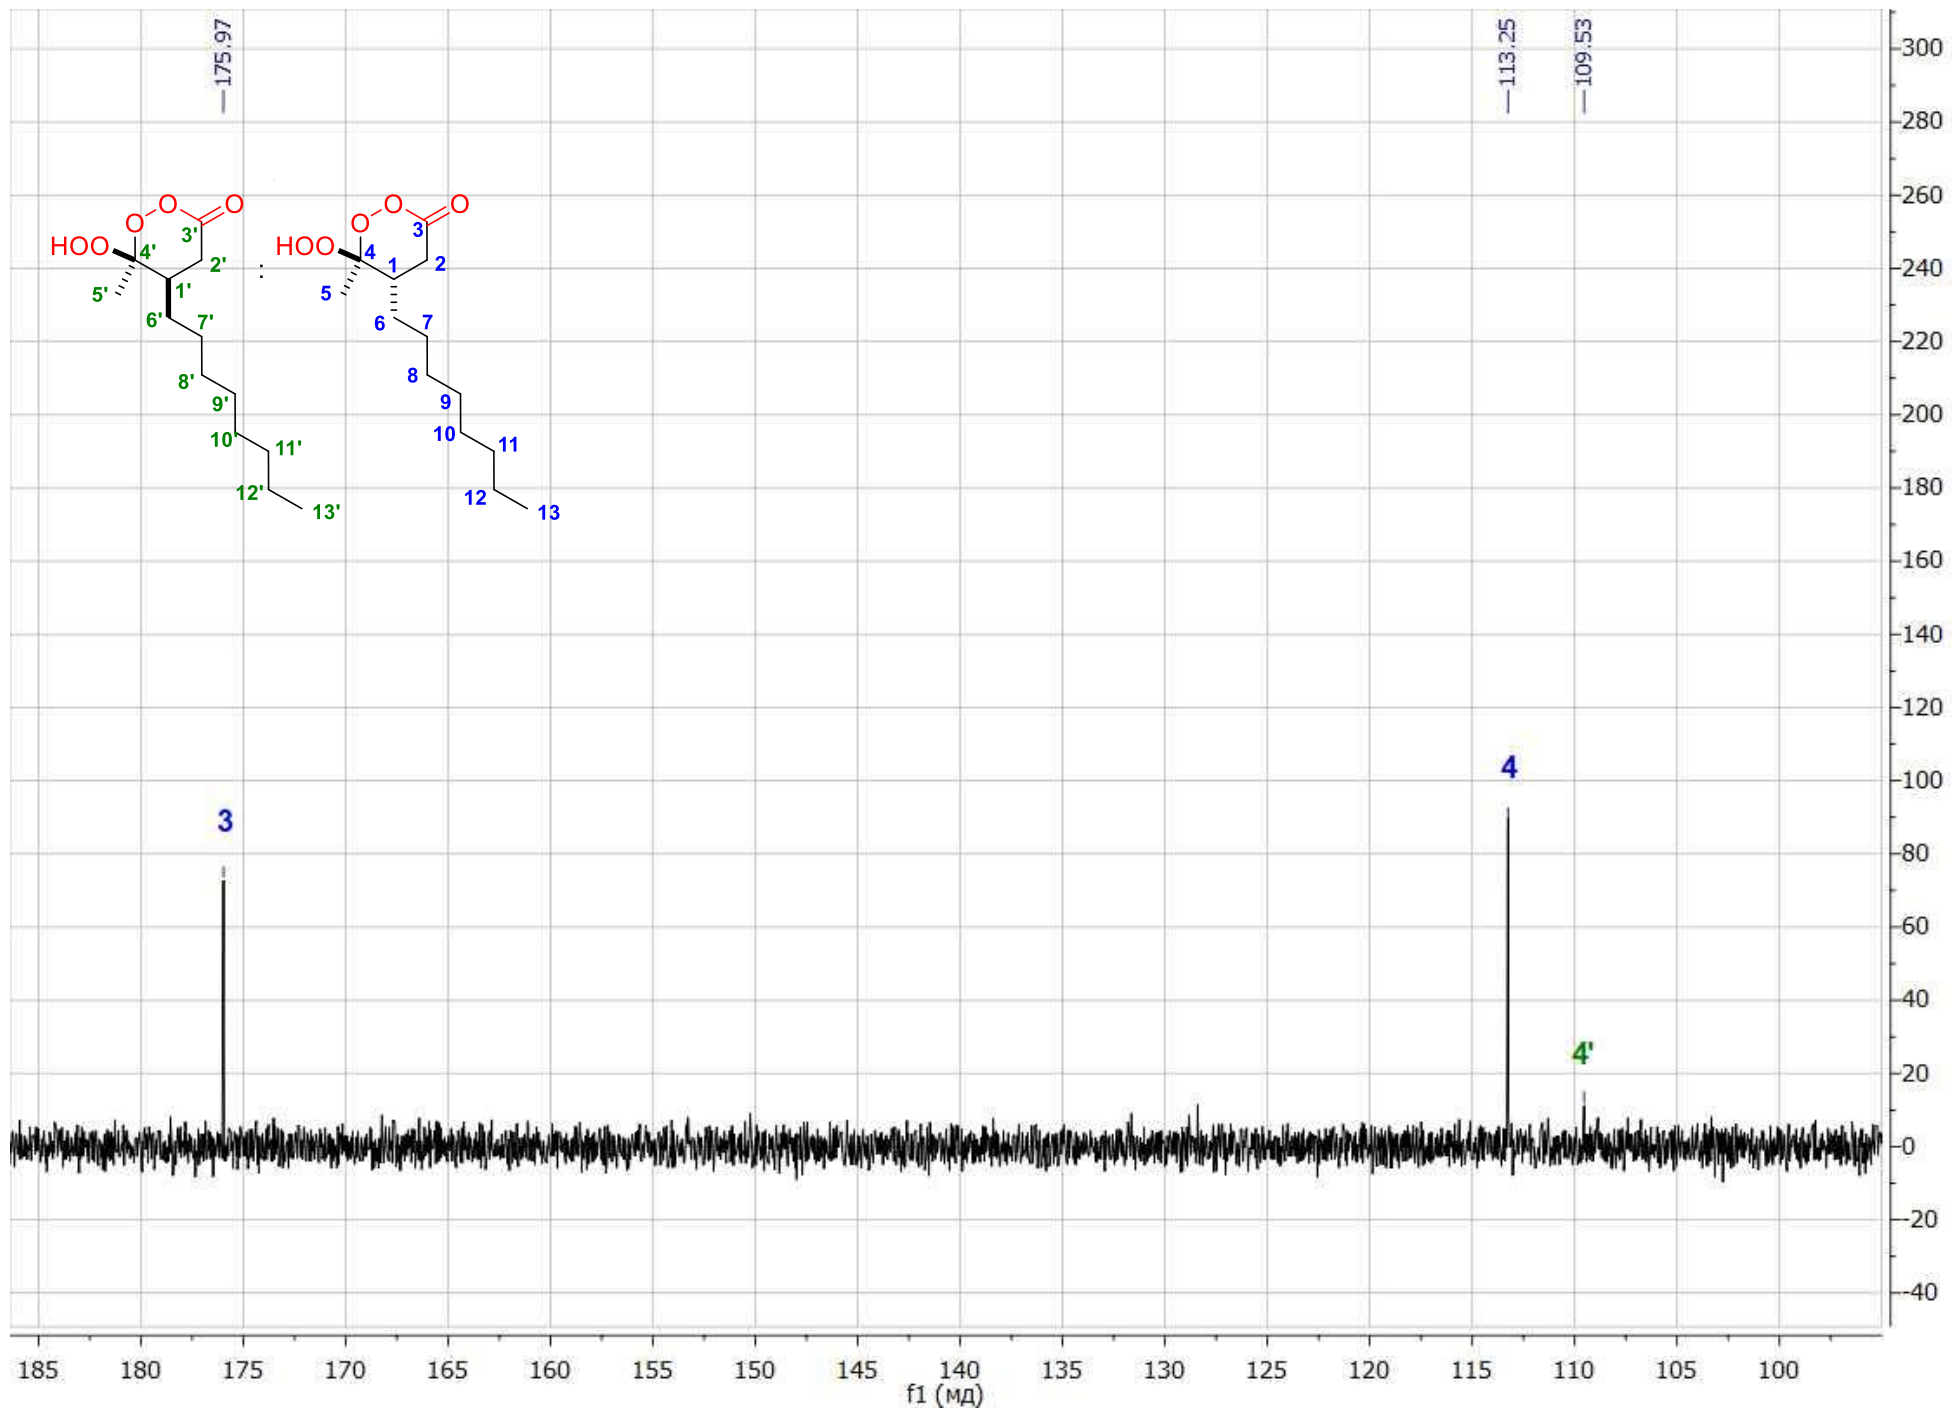



<sup>13</sup>C\_deptsp135

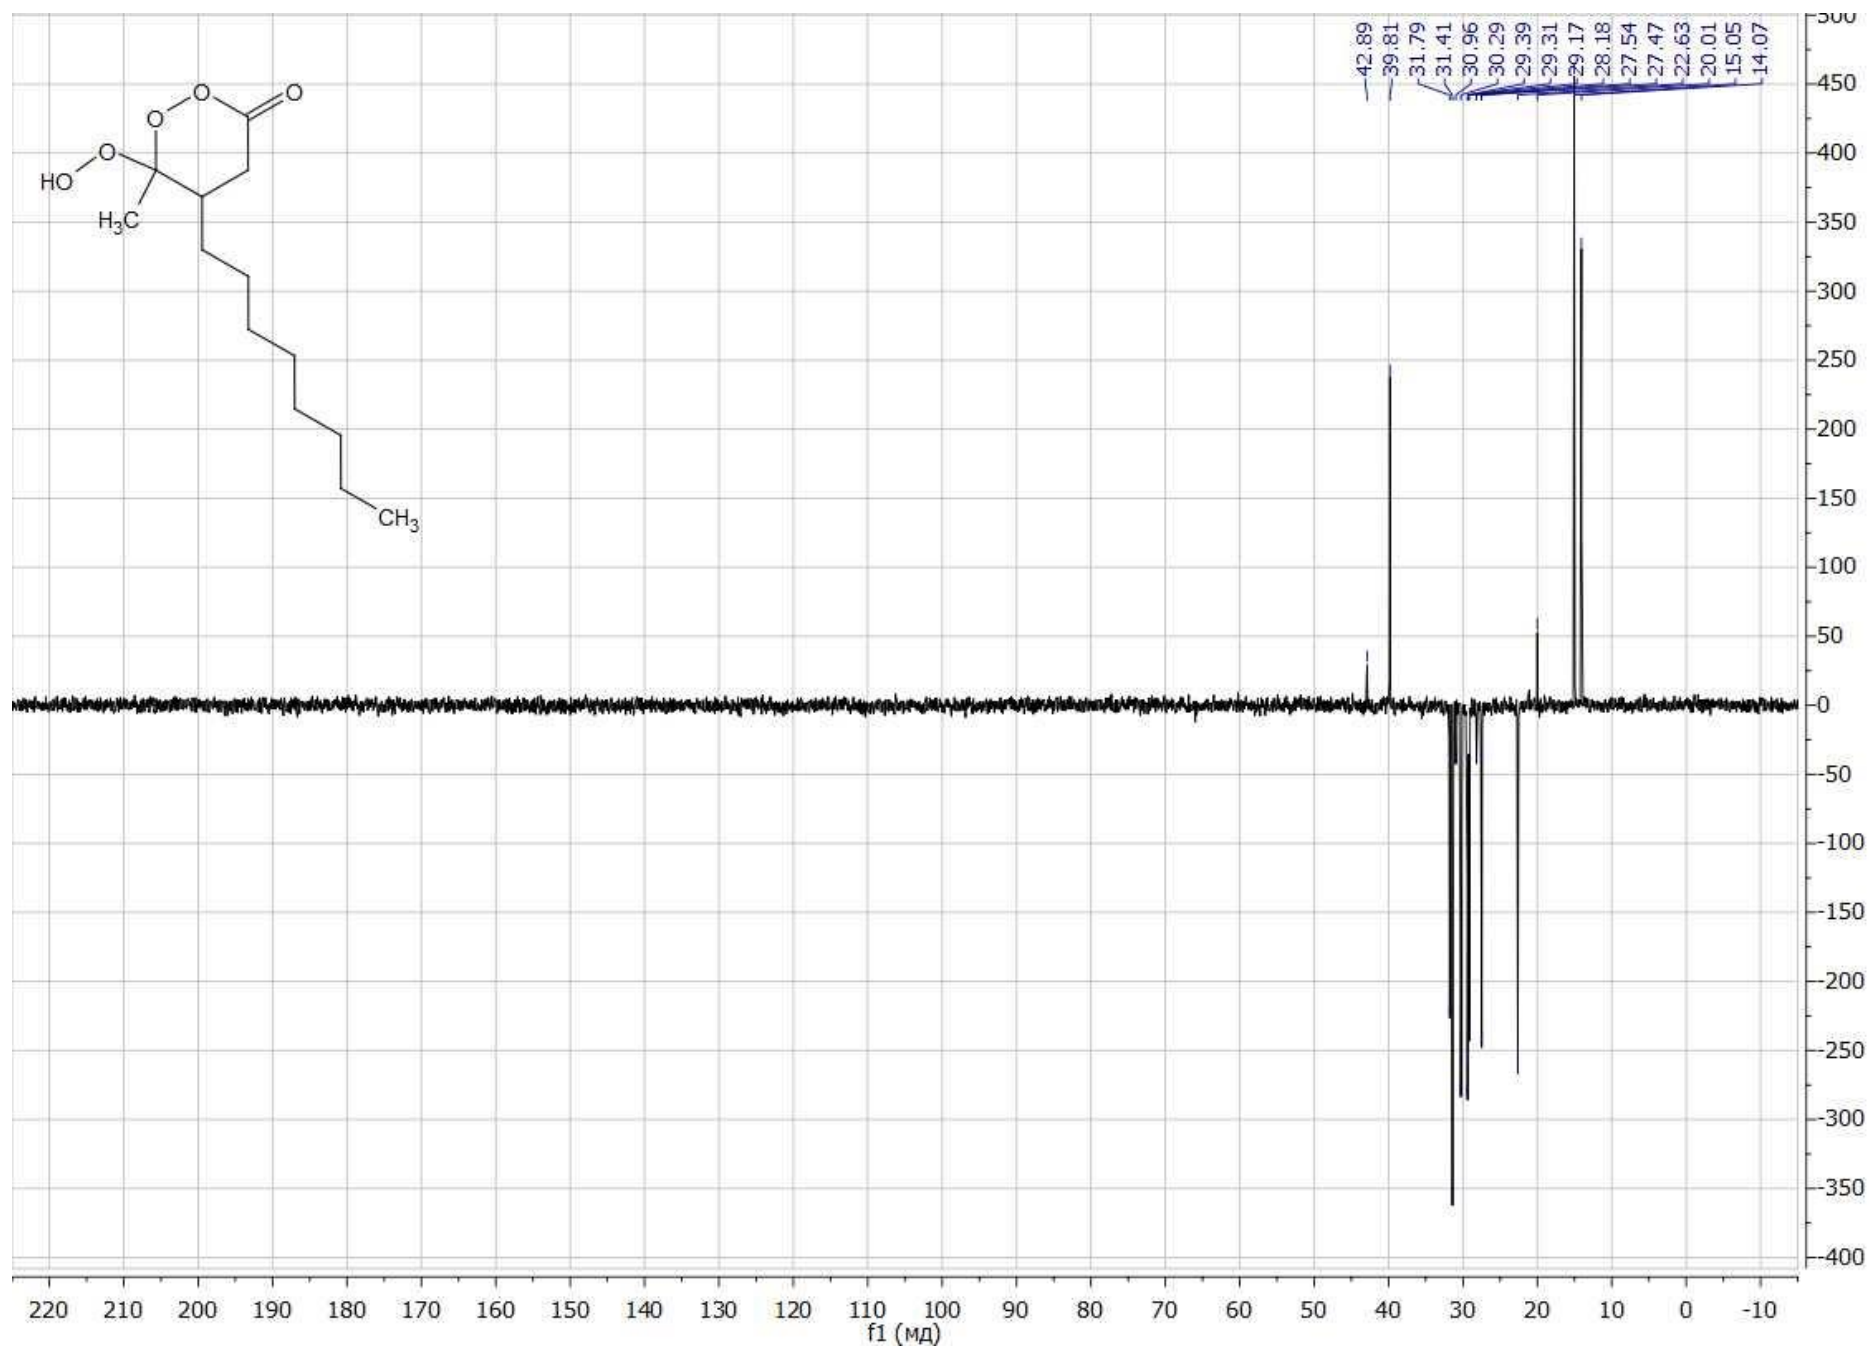

{<sup>1</sup>H-<sup>1</sup>H} COSY

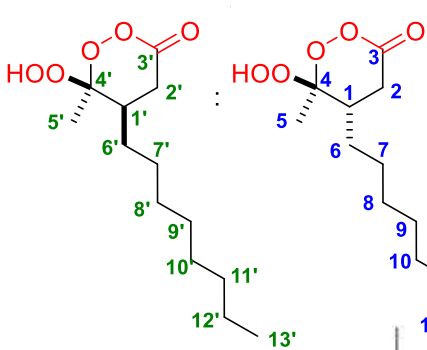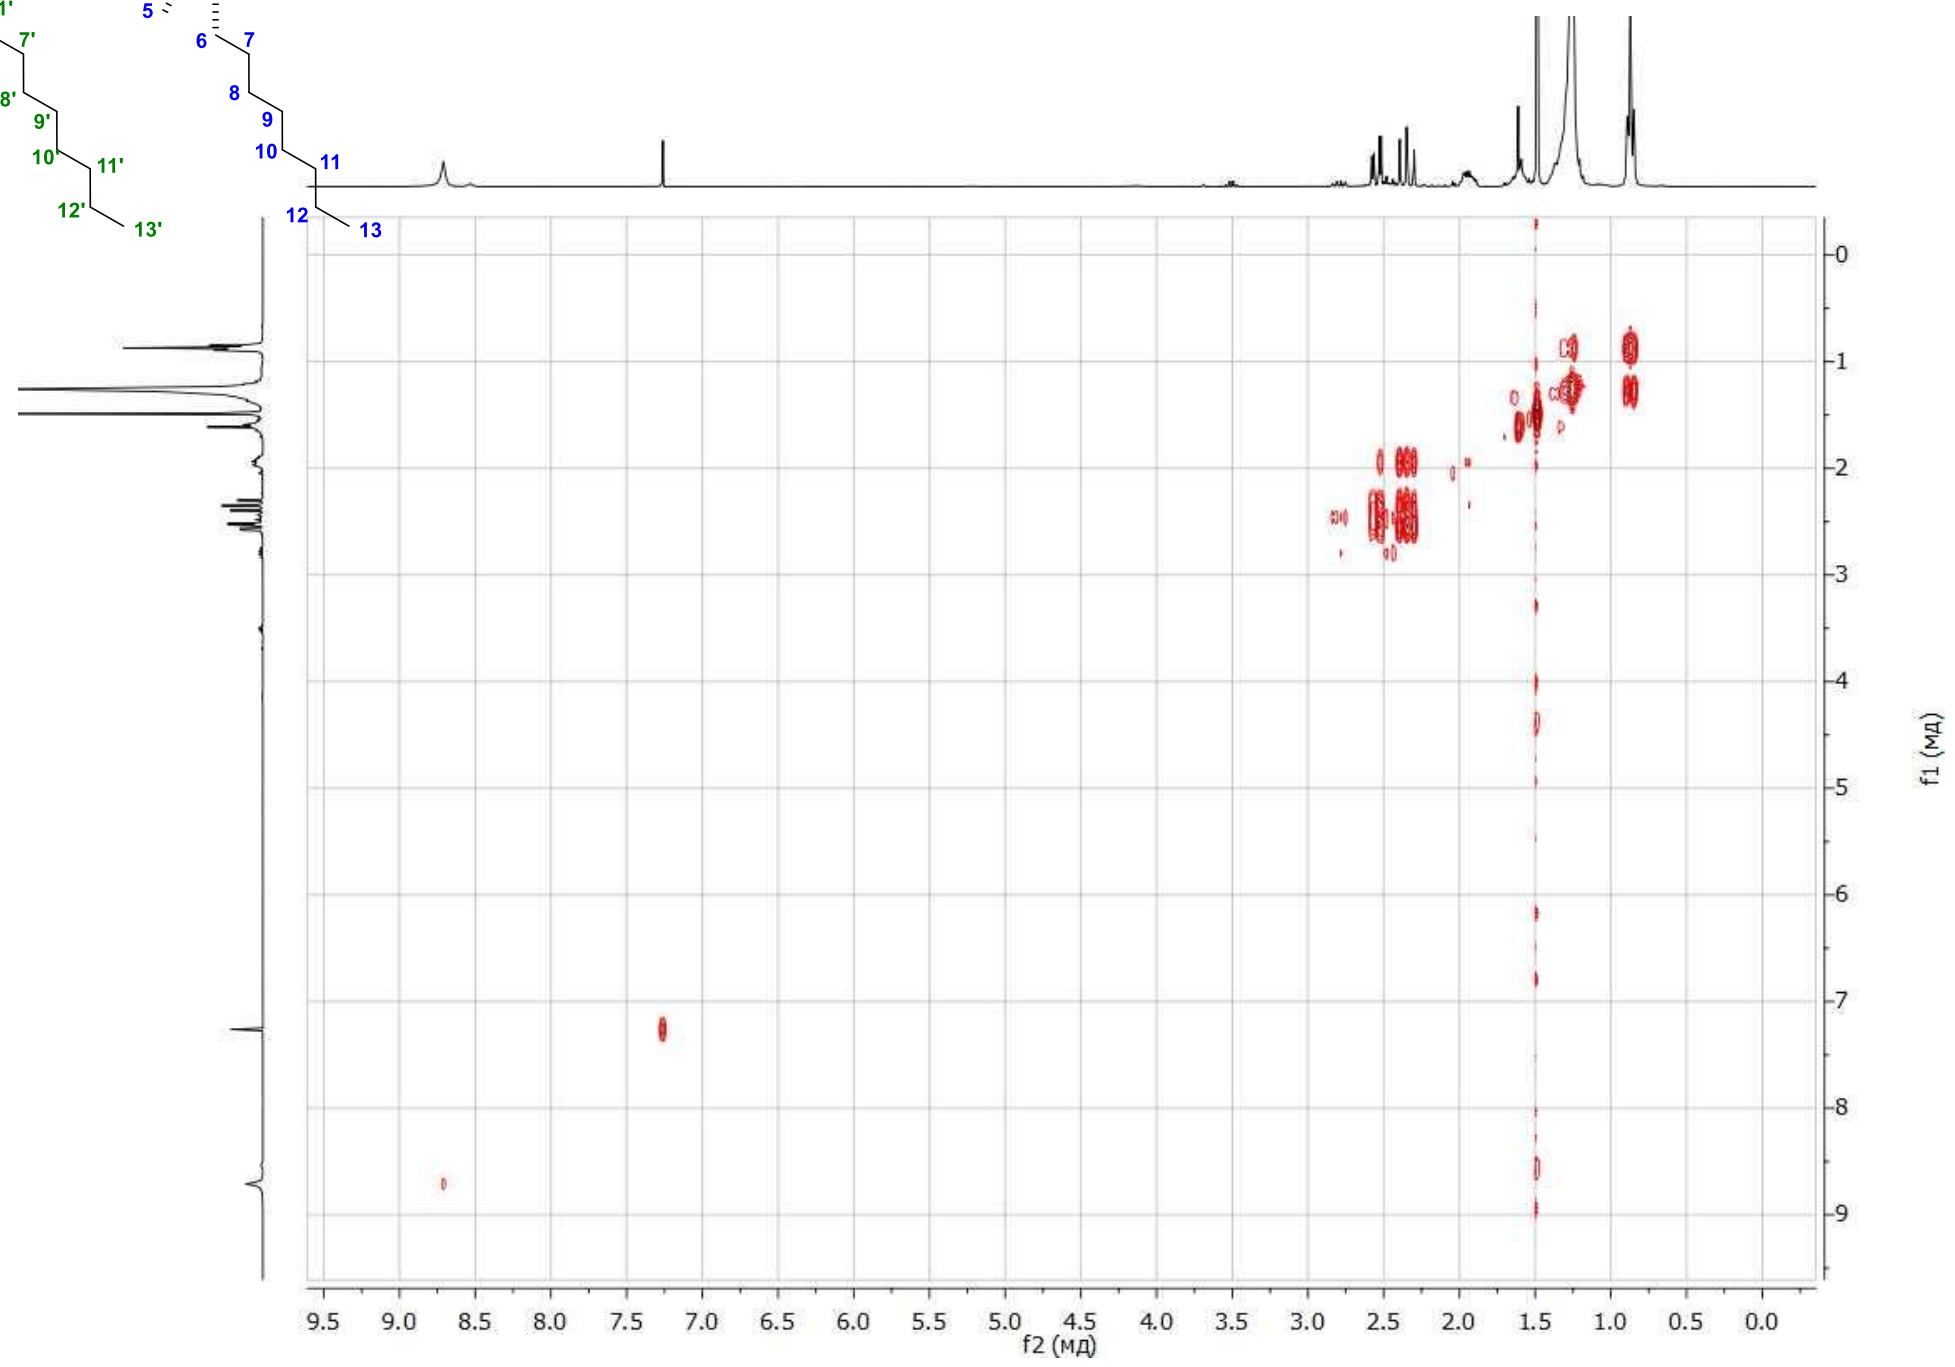

{<sup>1</sup>H-<sup>1</sup>H} NOESY

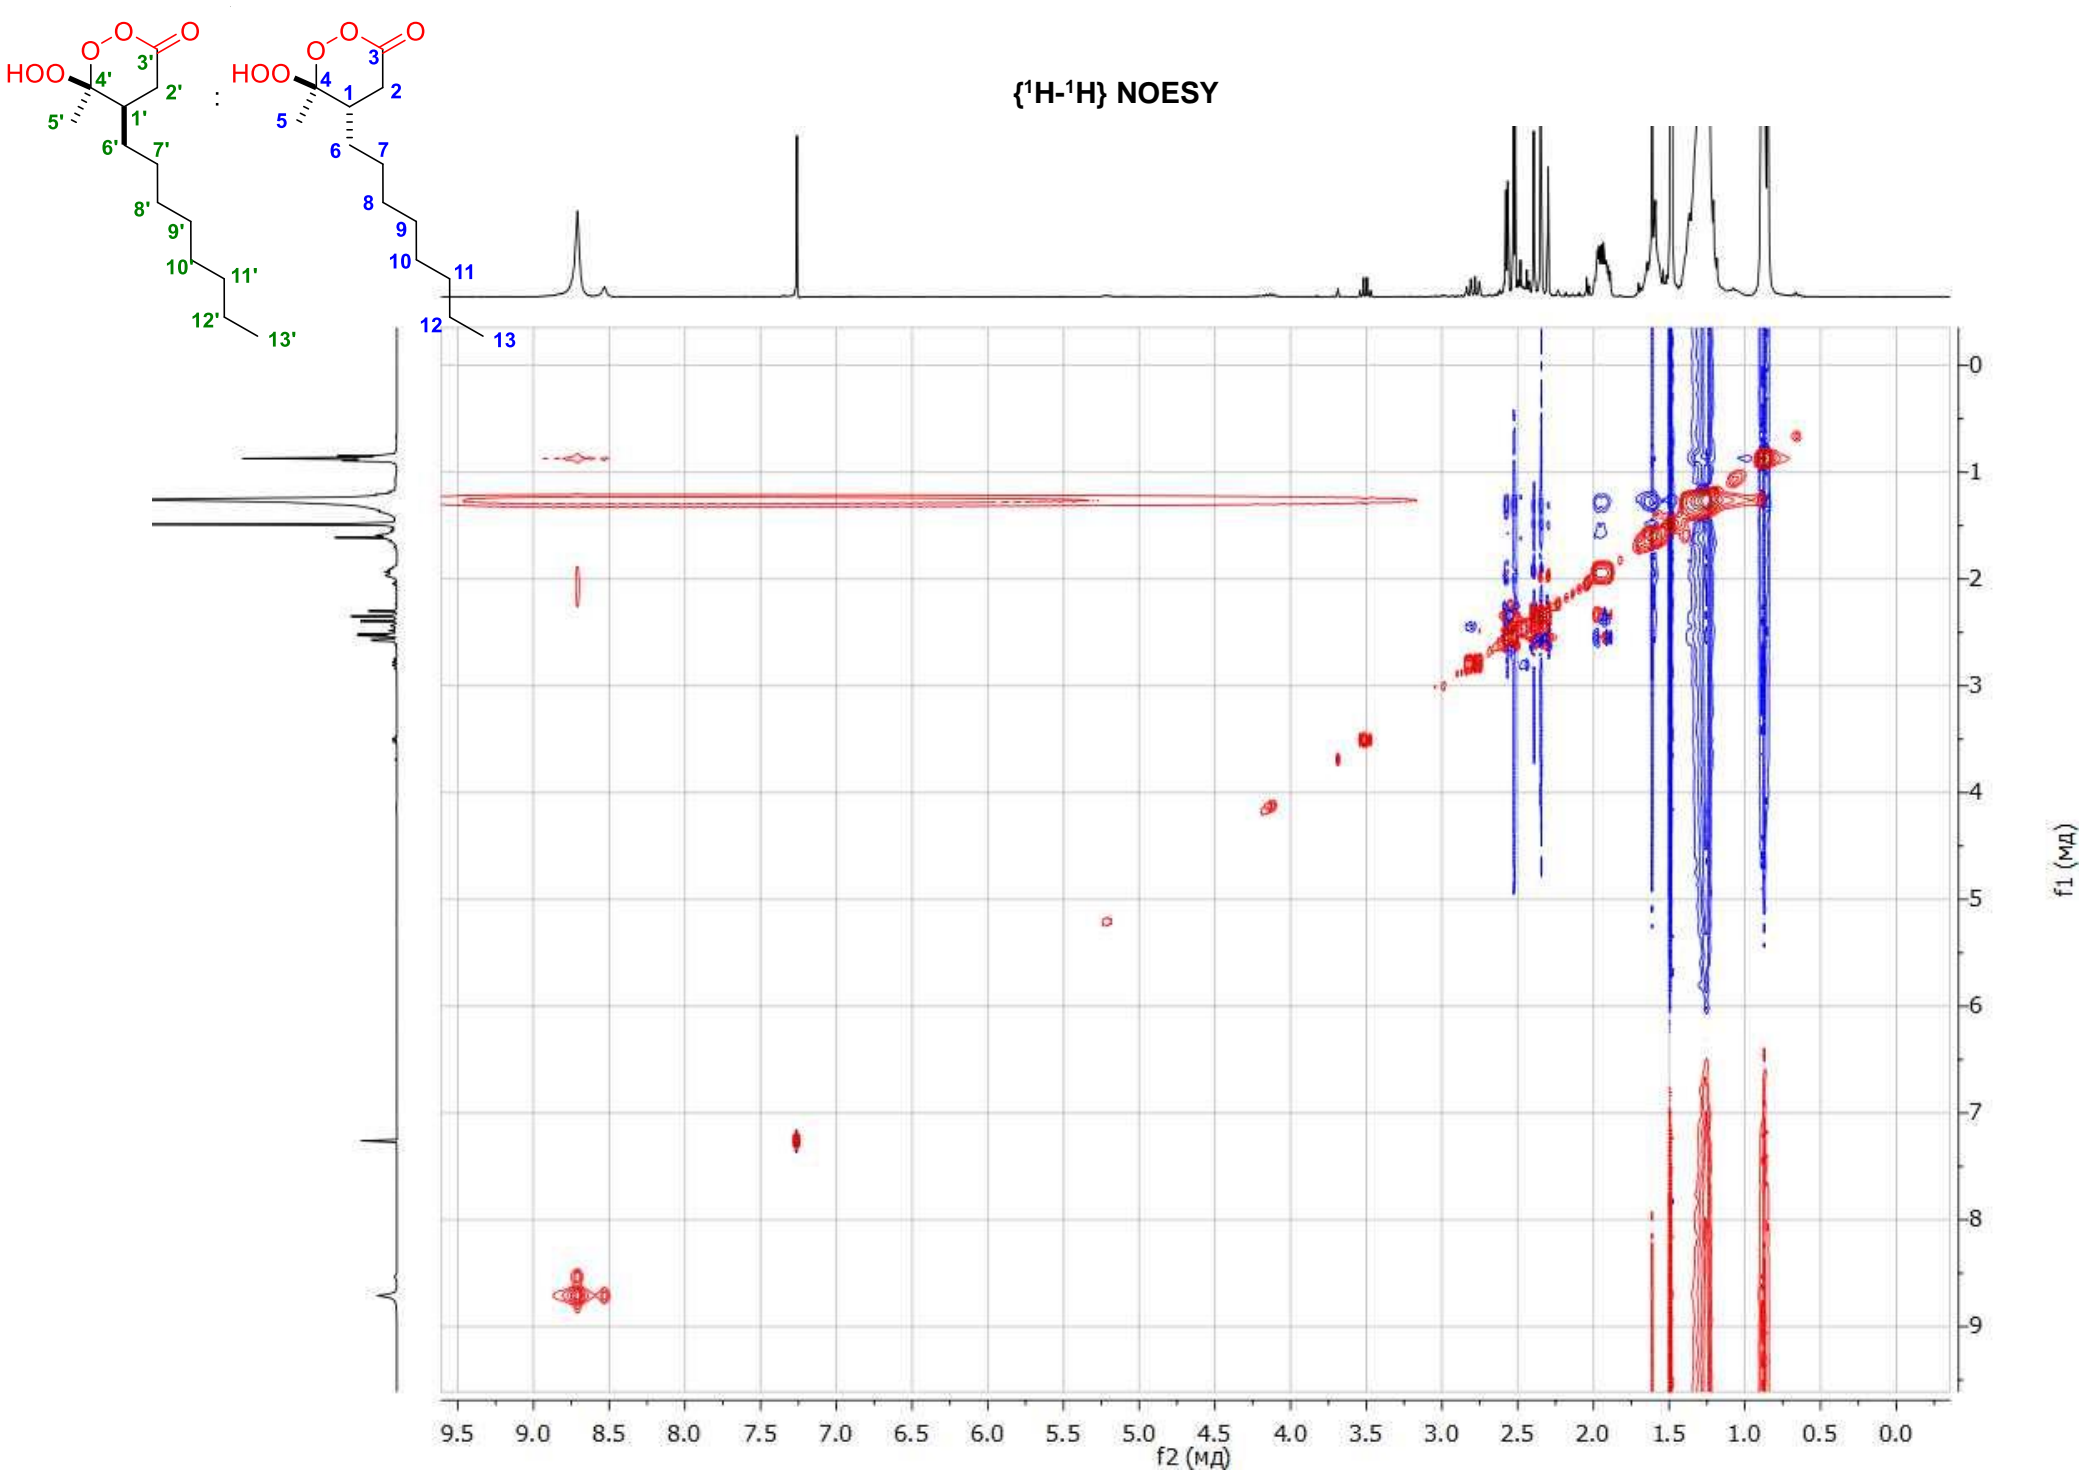

{<sup>1</sup>H-<sup>13</sup>C} HSQC

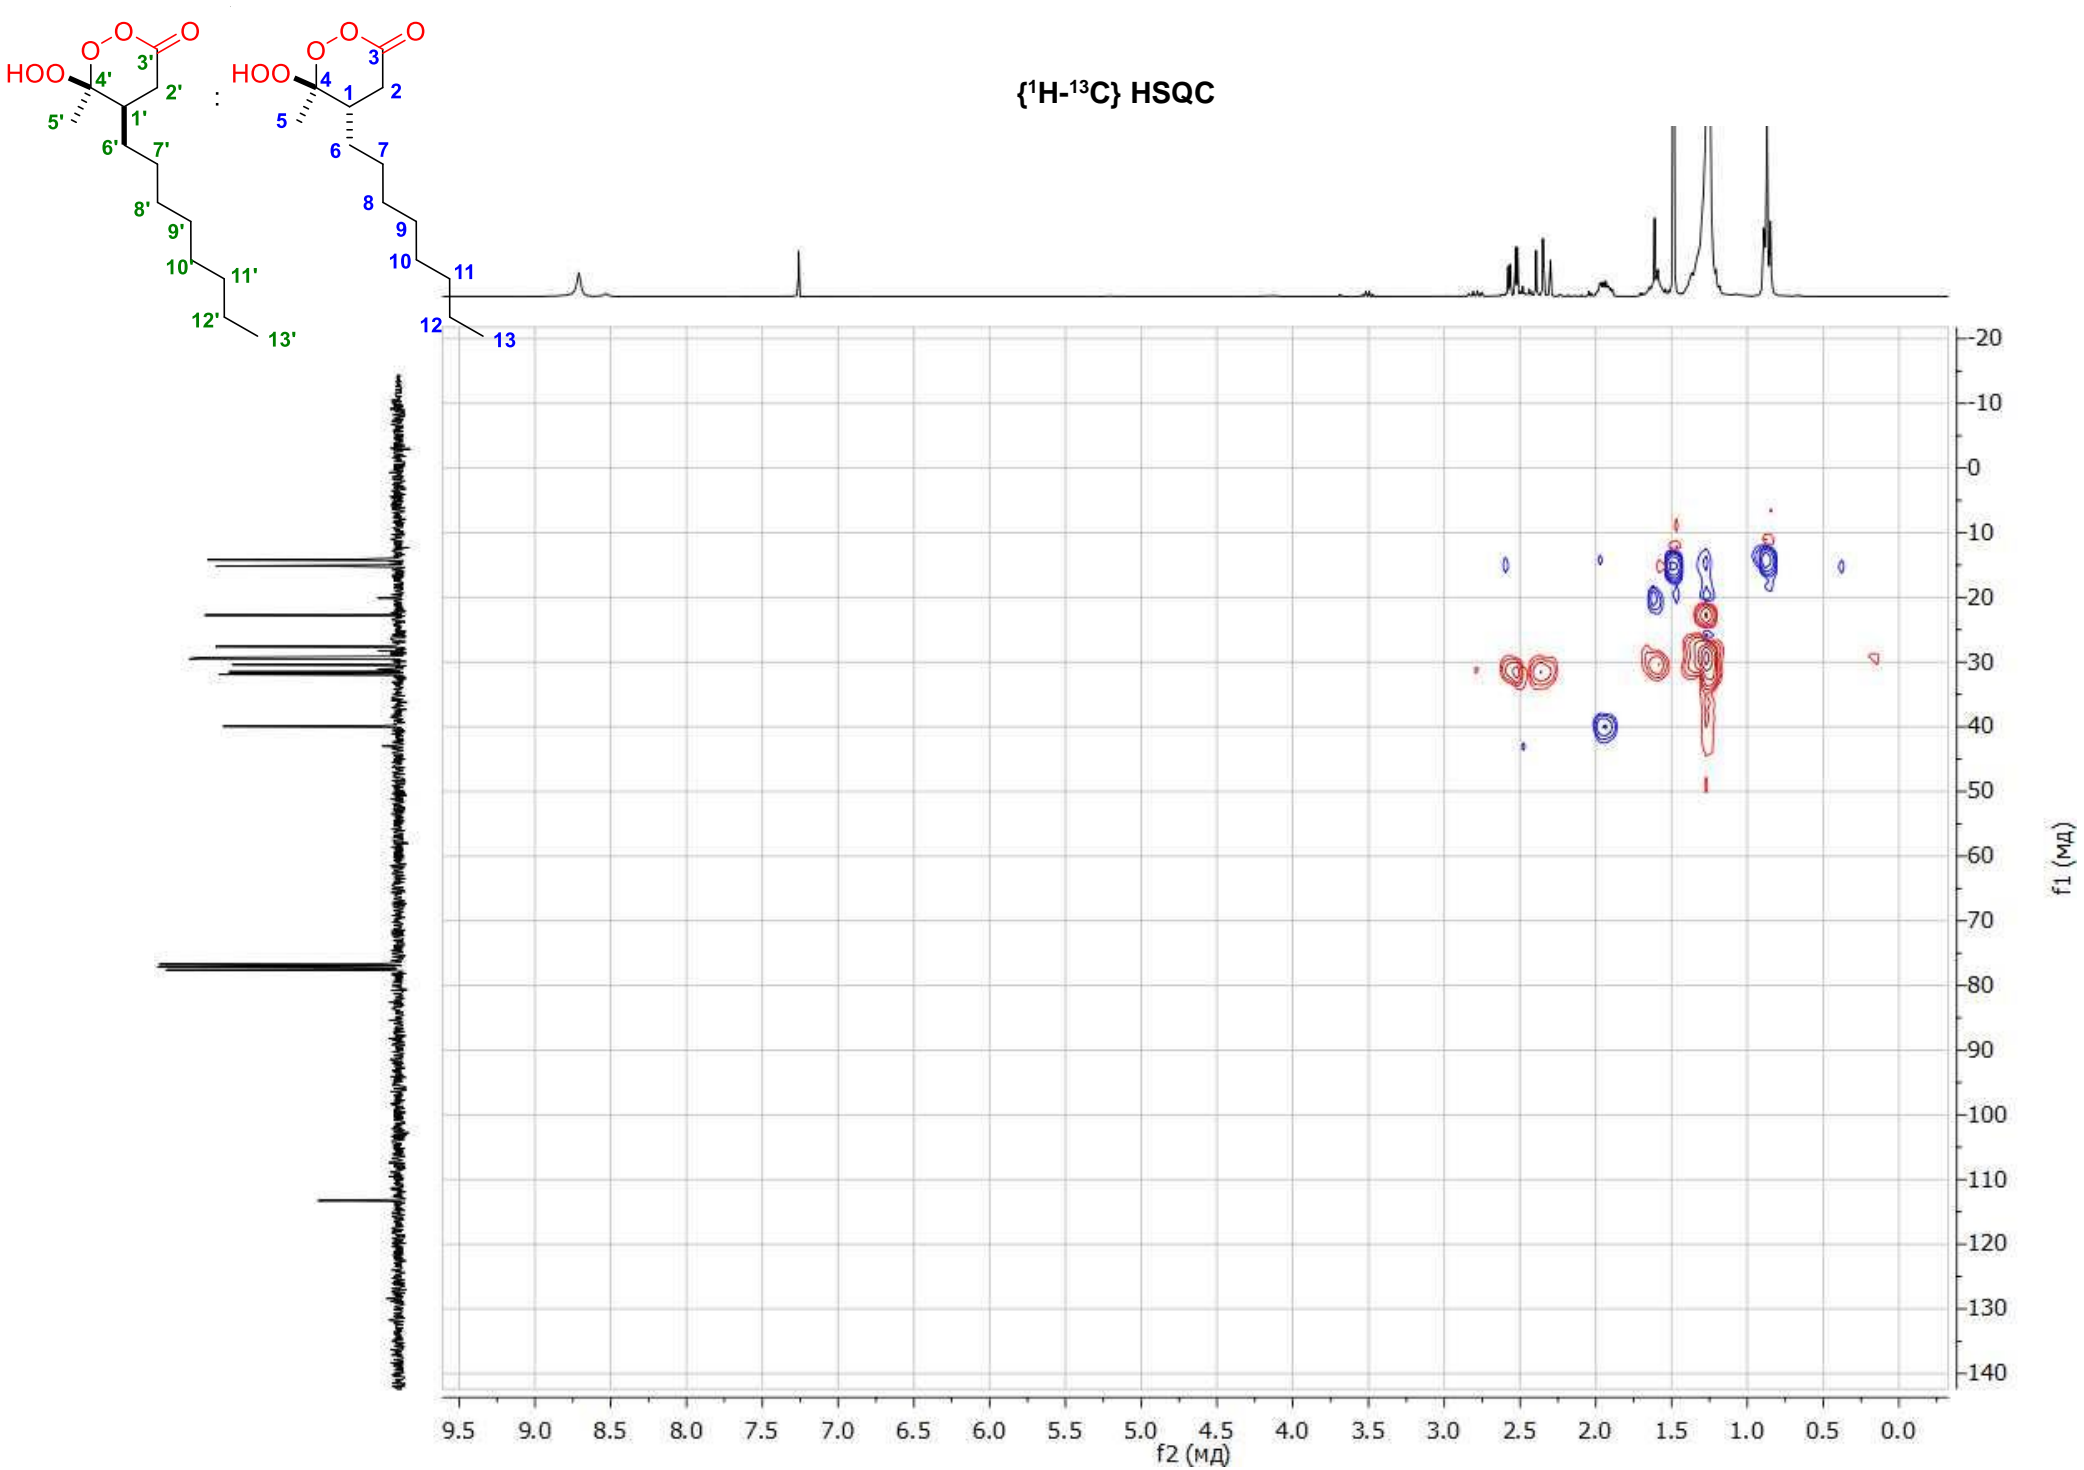

{<sup>1</sup>H-<sup>13</sup>C} HMBC

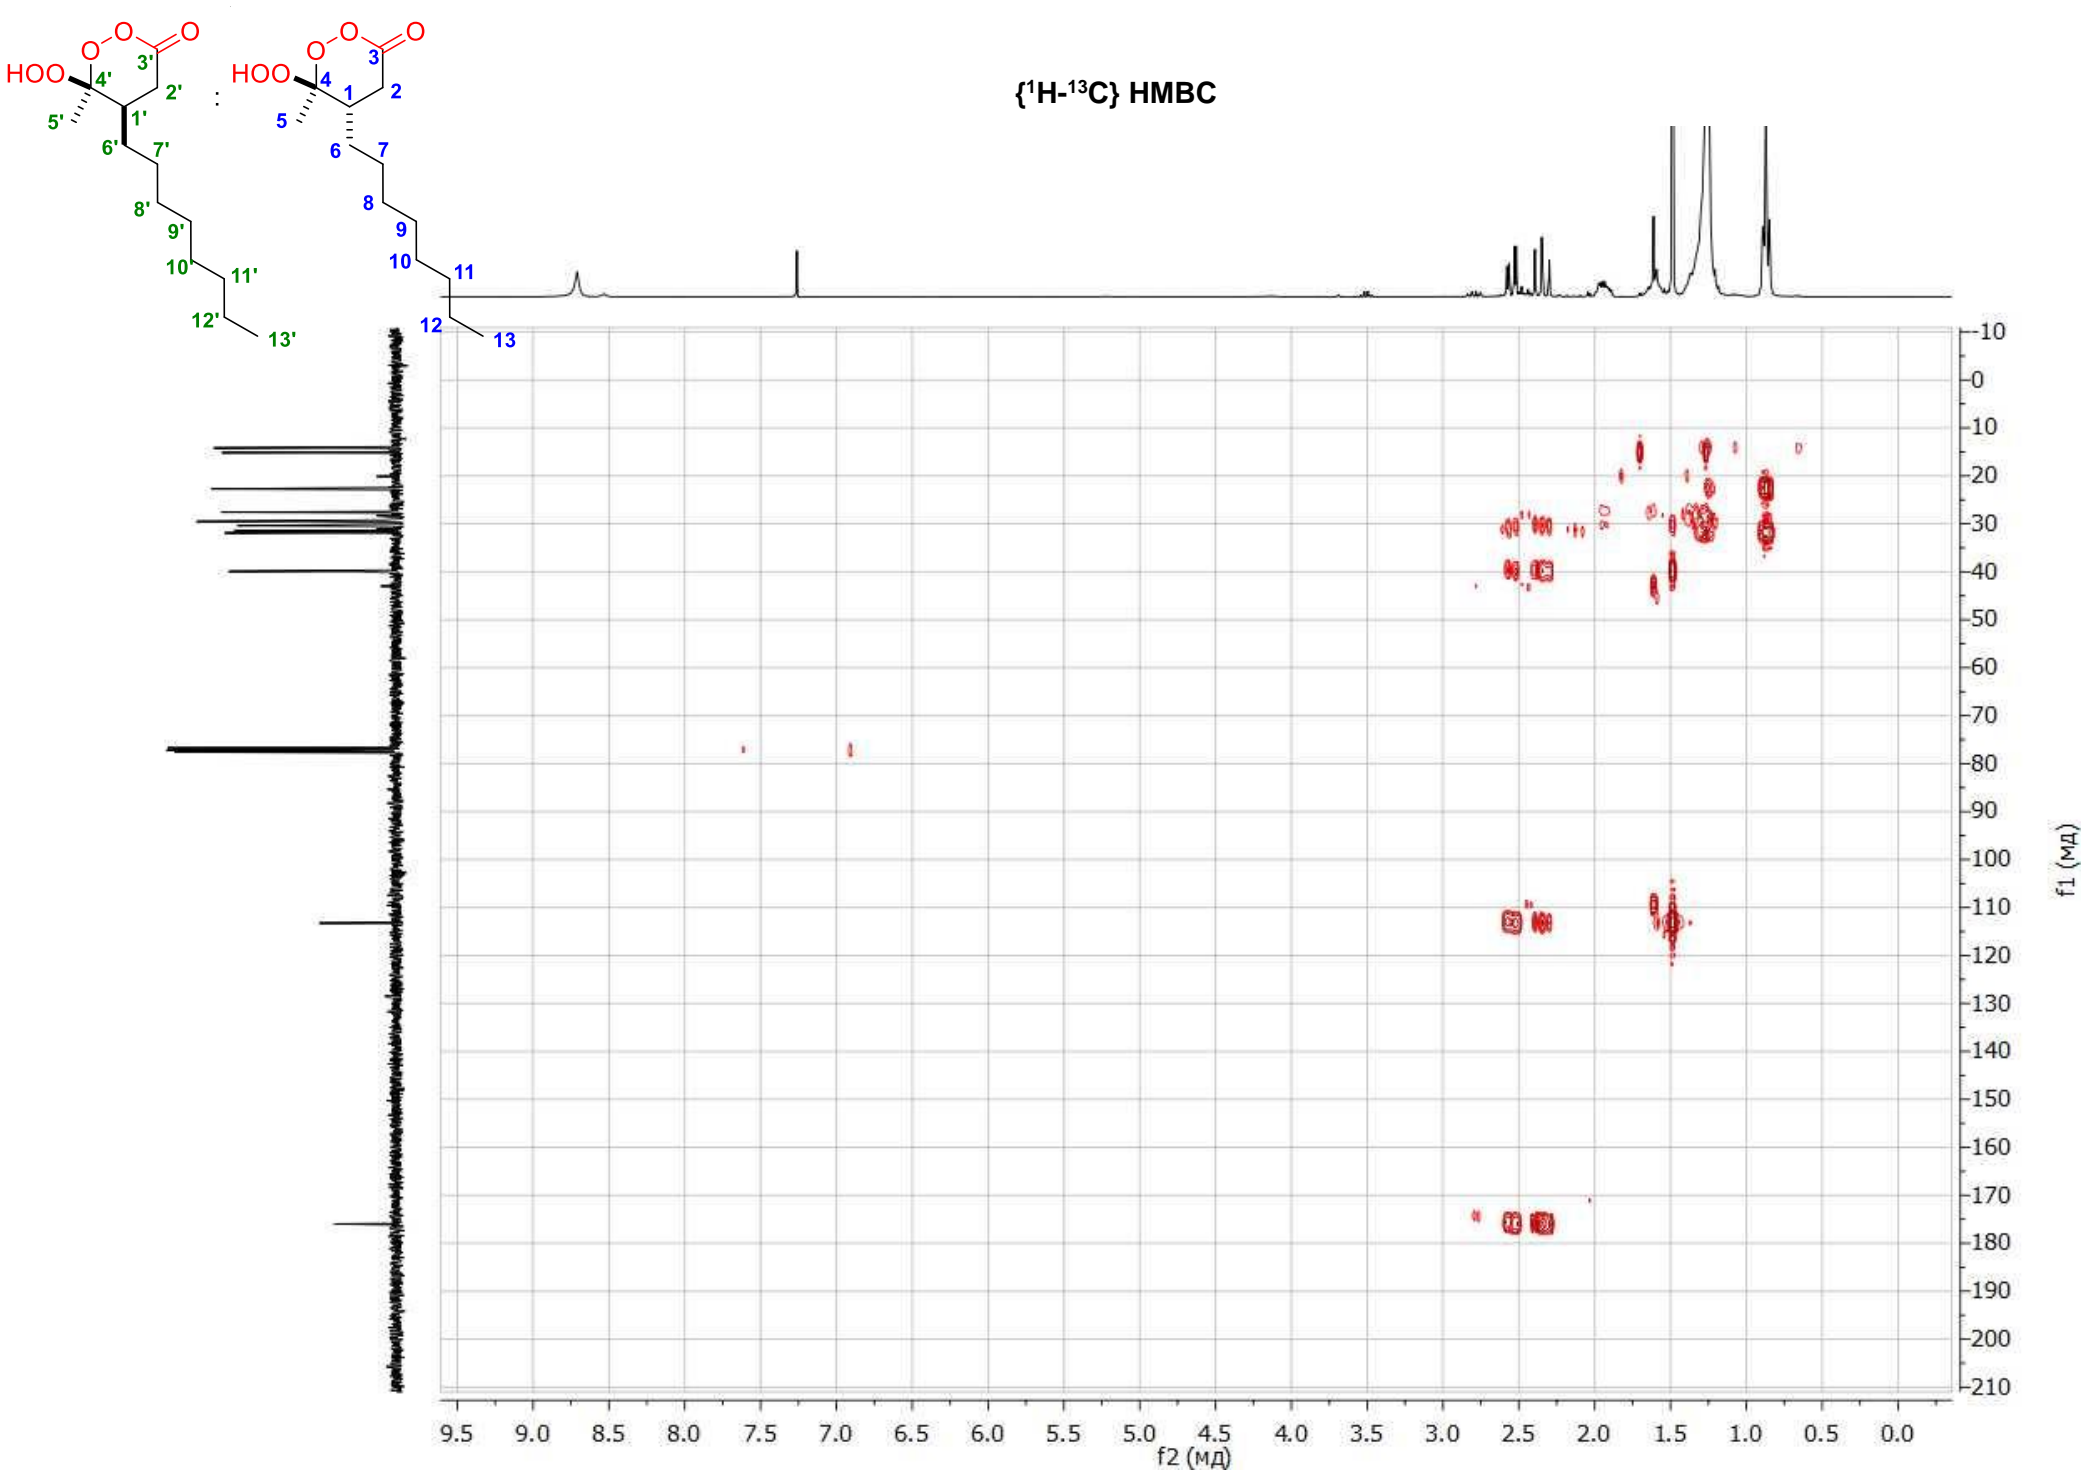

# 6-Hydroperoxy-6-methyl-1,2-dioxan-3-one, 2m

## <sup>1</sup>H NMR

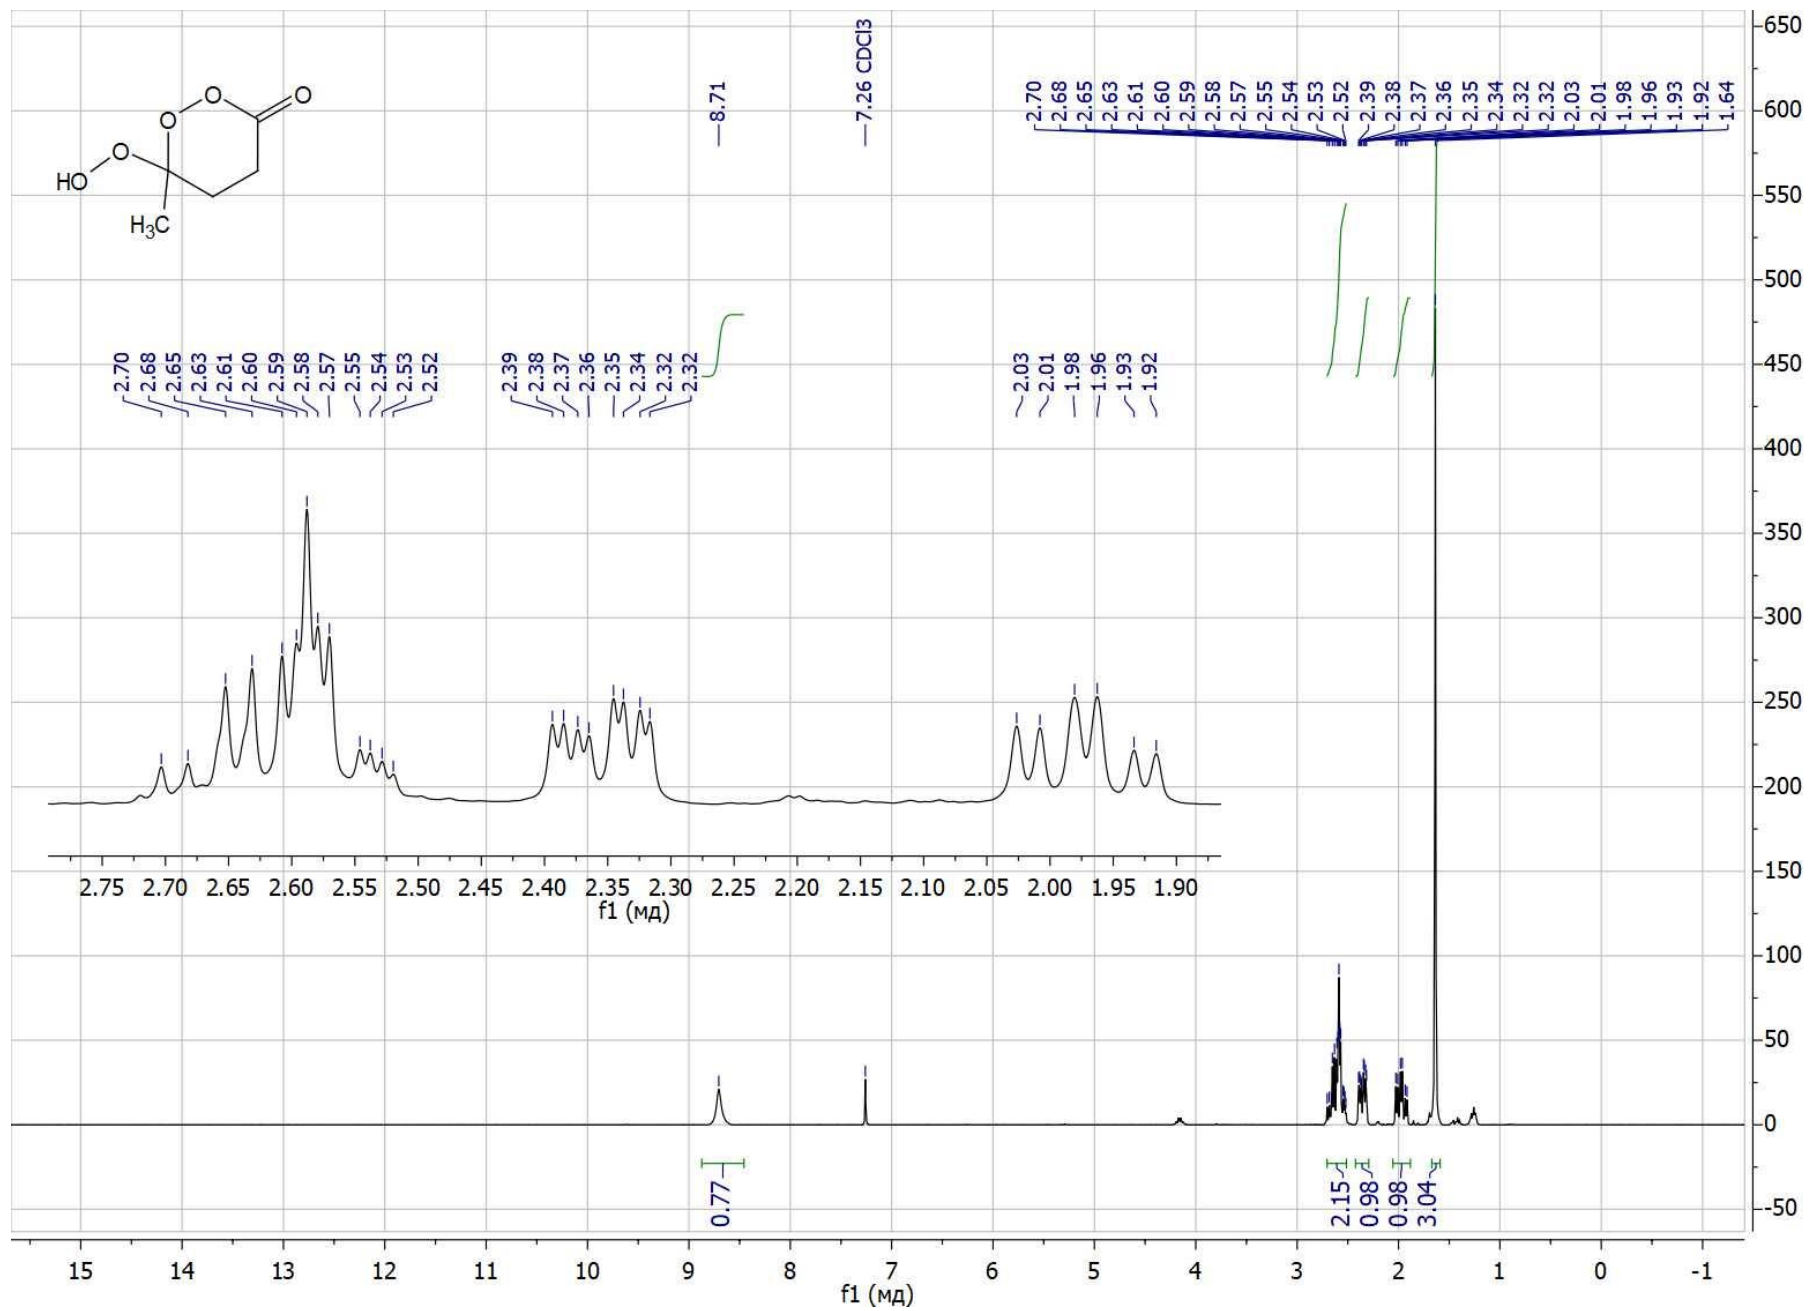

<sup>13</sup>C NMR

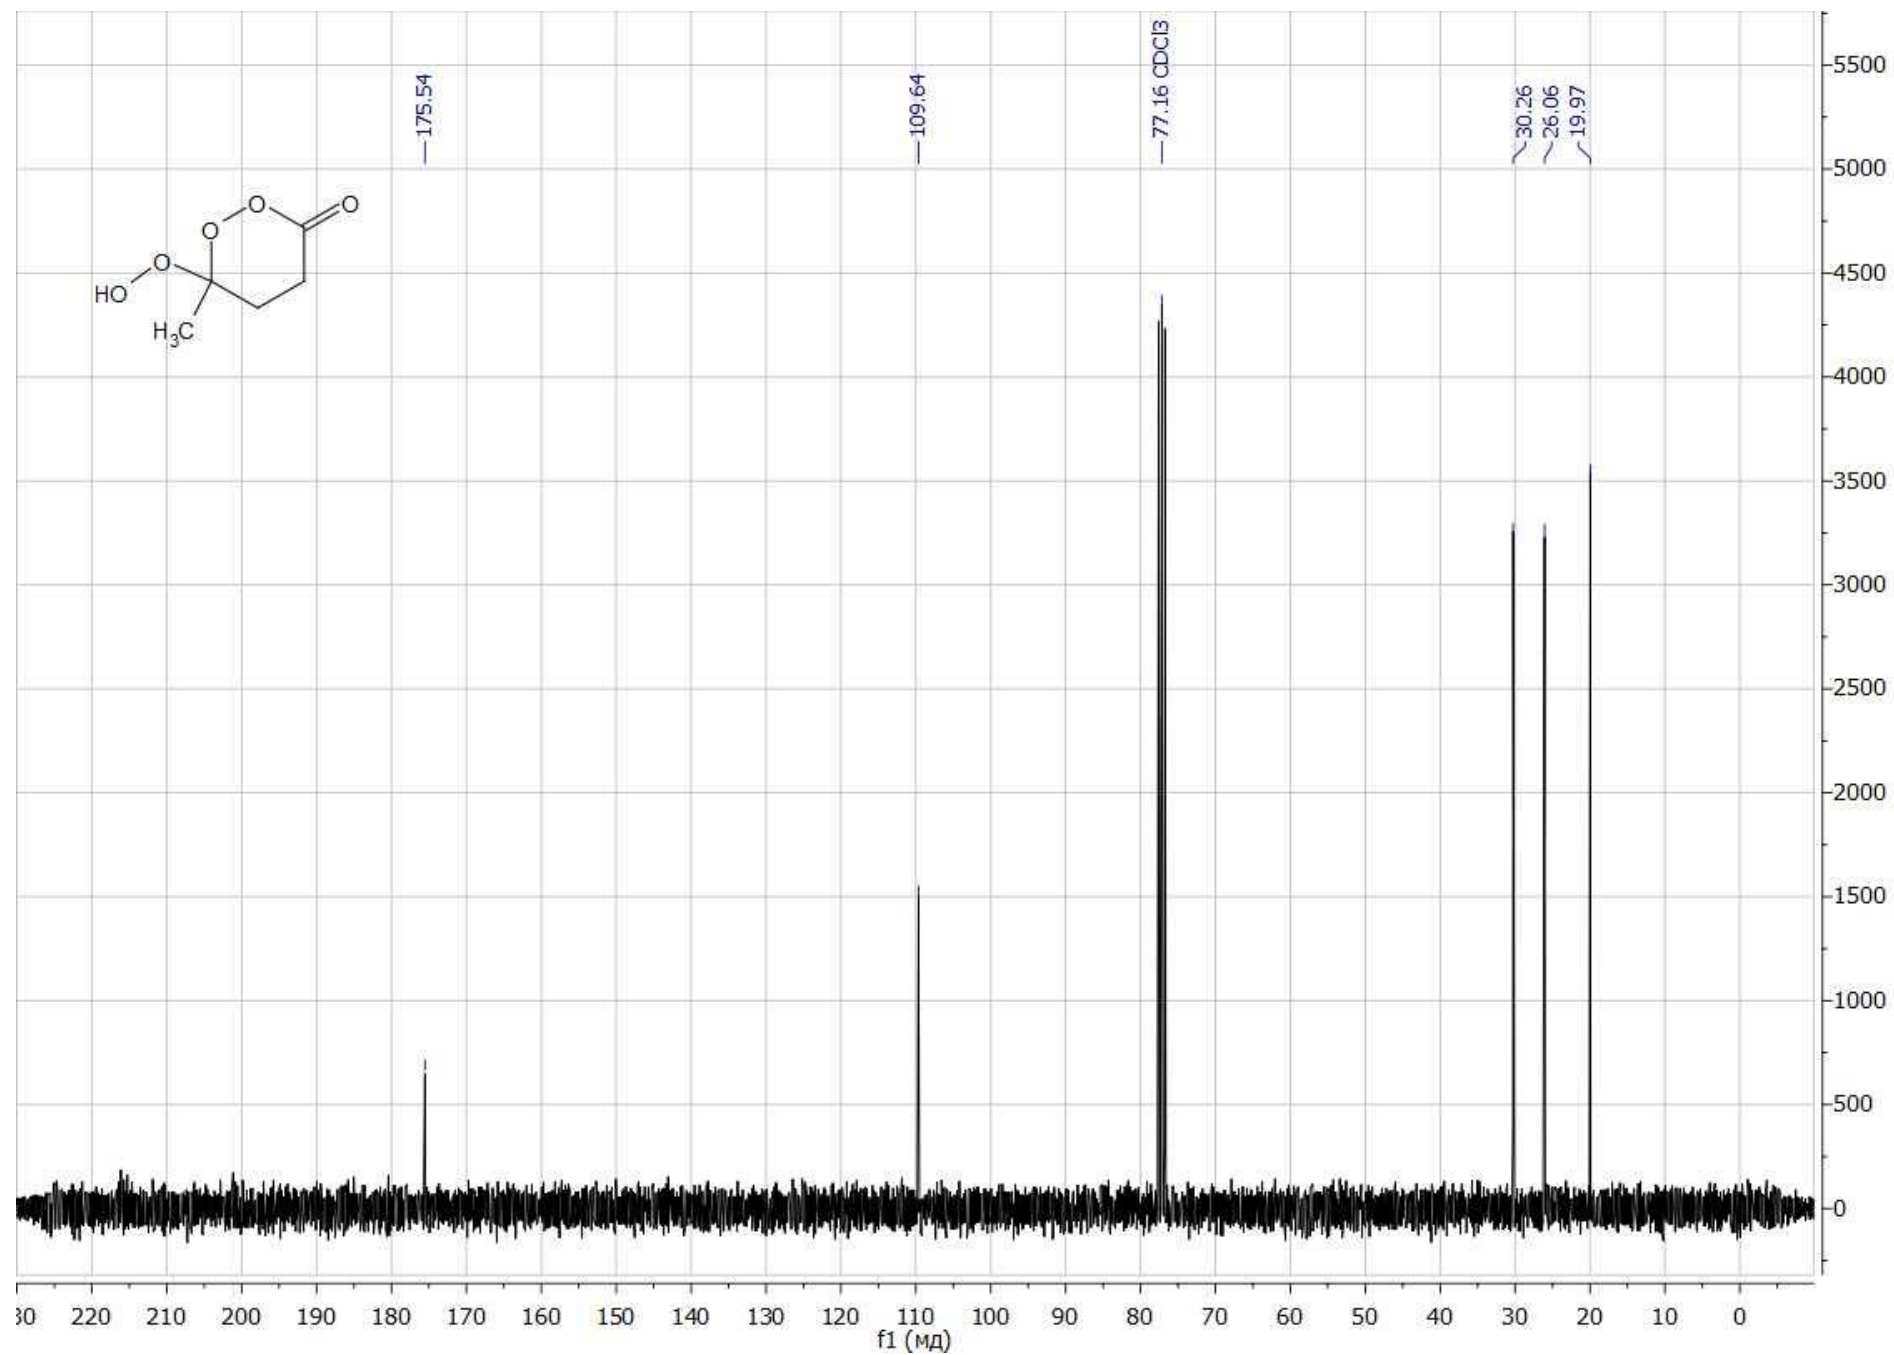

# 6-Hydroperoxy-4,6-dimethyl-1,2-dioxan-3-one, 2n

## <sup>1</sup>H NMR

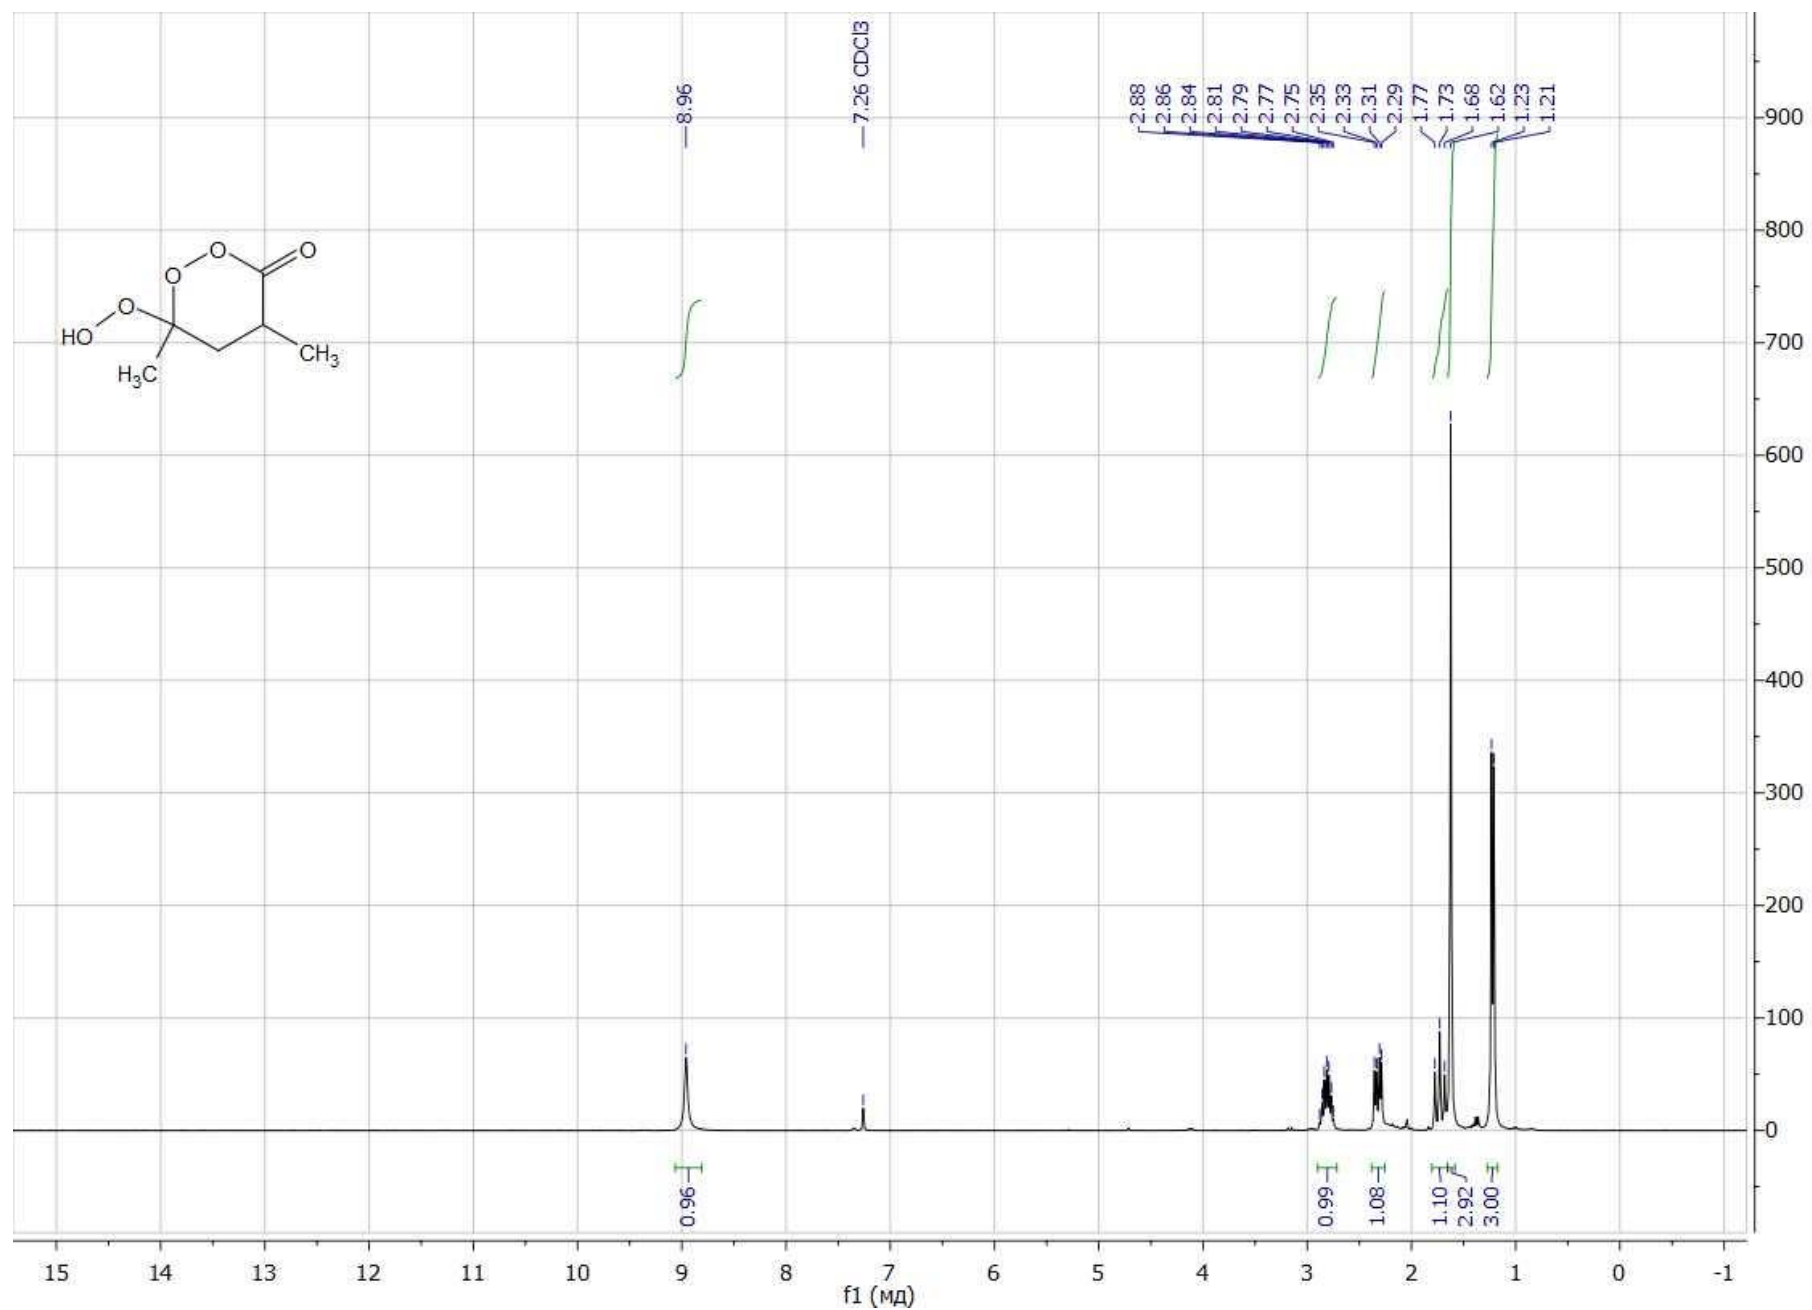



<sup>13</sup>C NMR

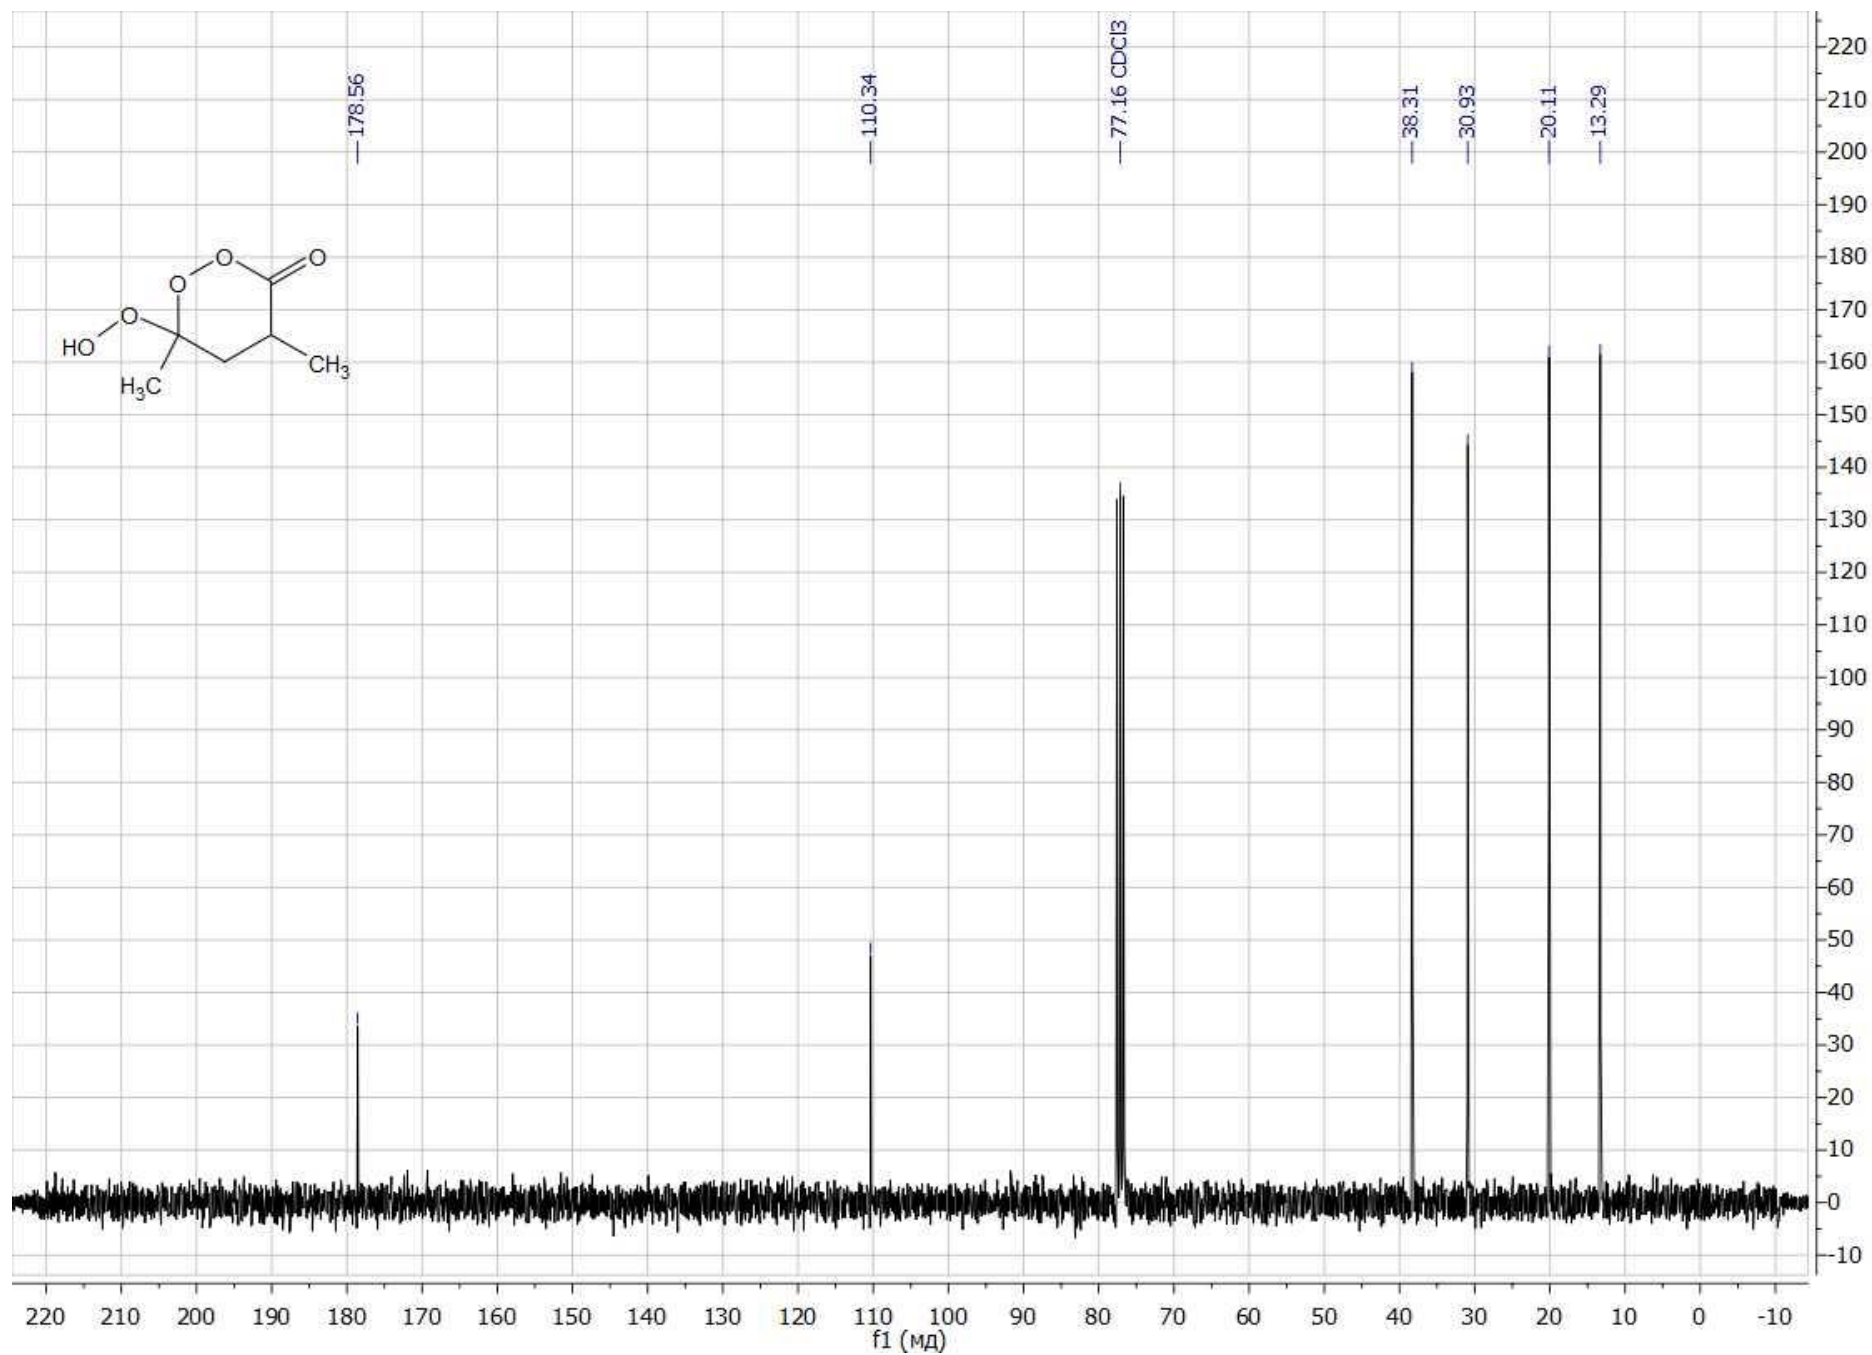

6-Butyl-6-hydroperoxy-1,2-dioxan-3-one, 2o

<sup>1</sup>H NMR

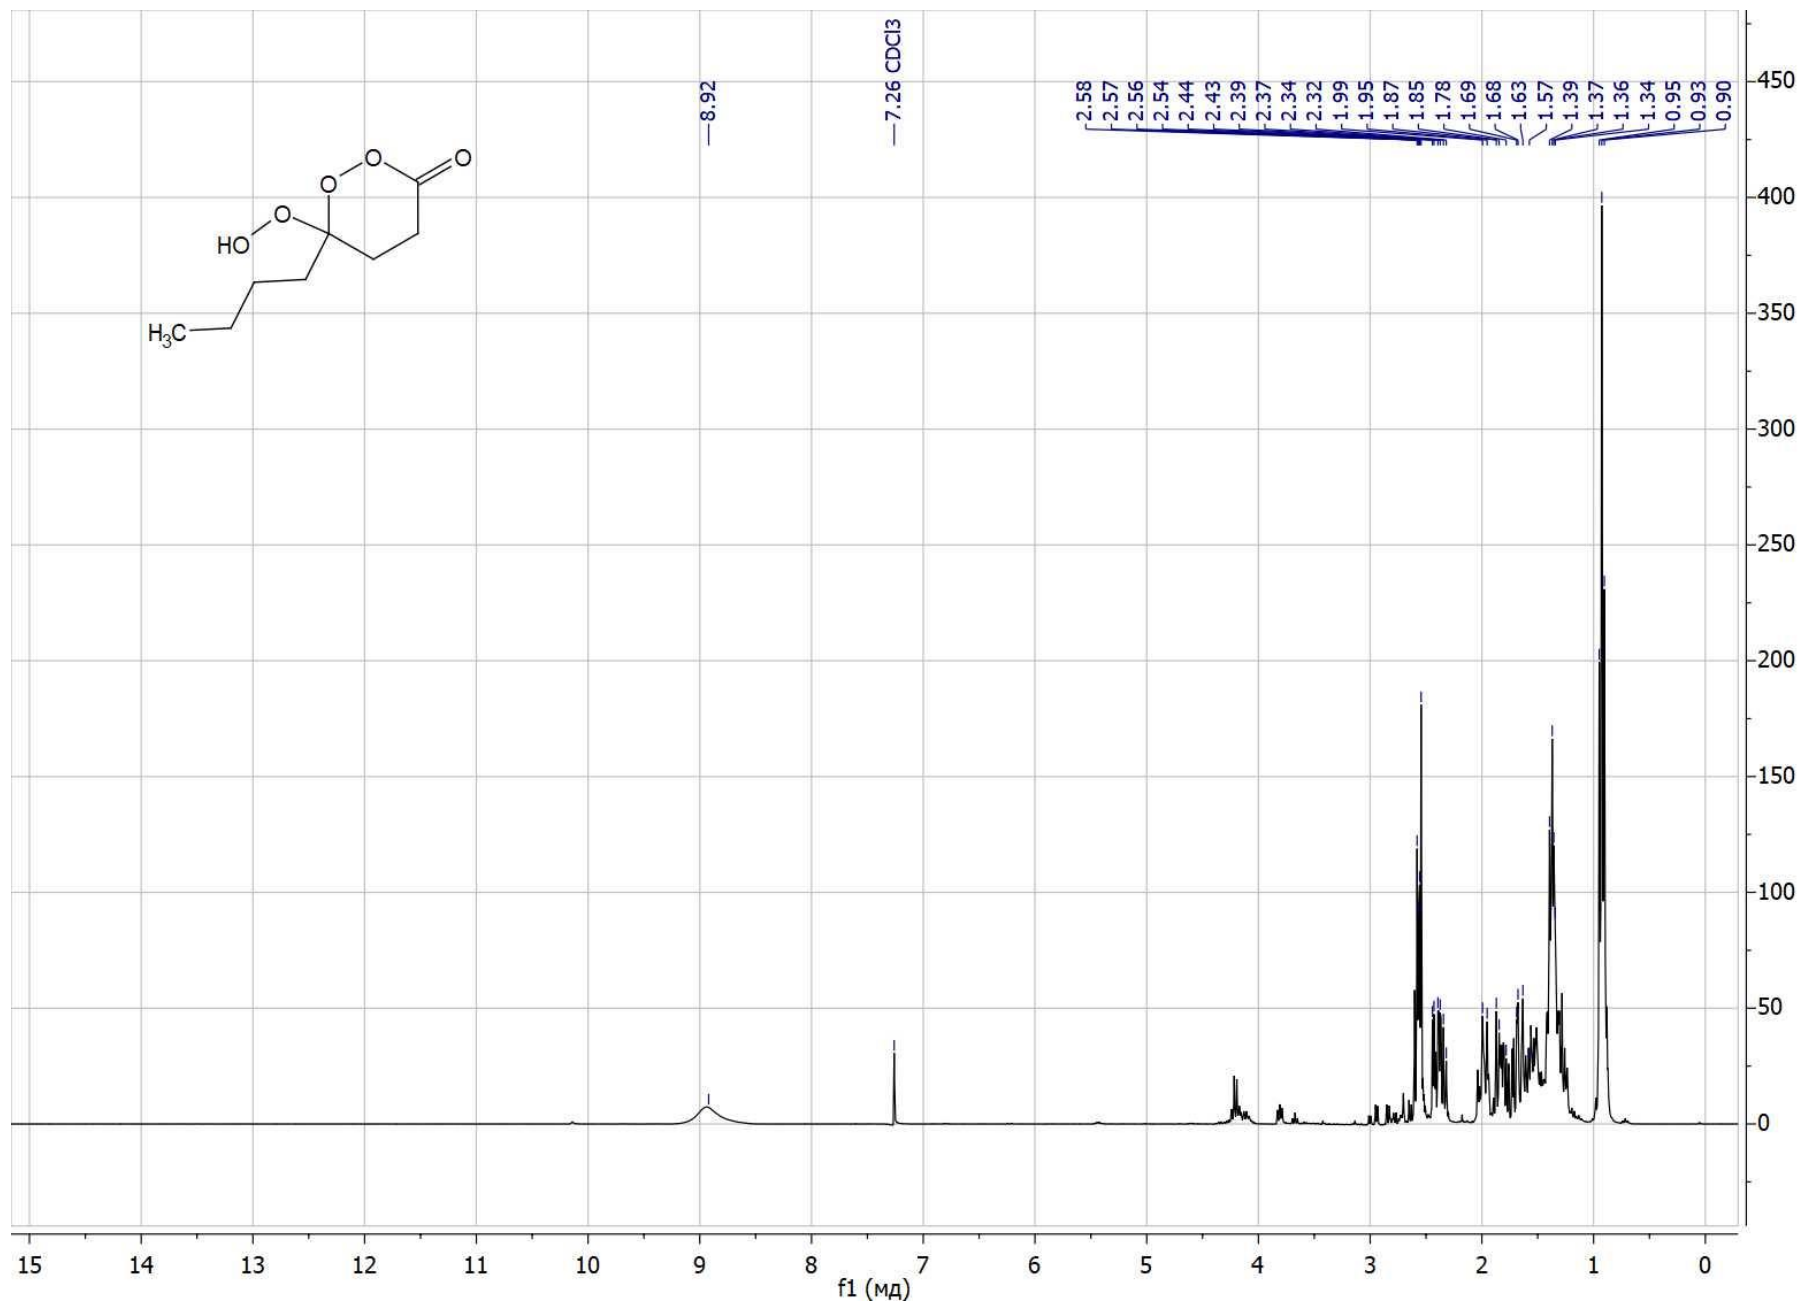

<sup>13</sup>C NMR

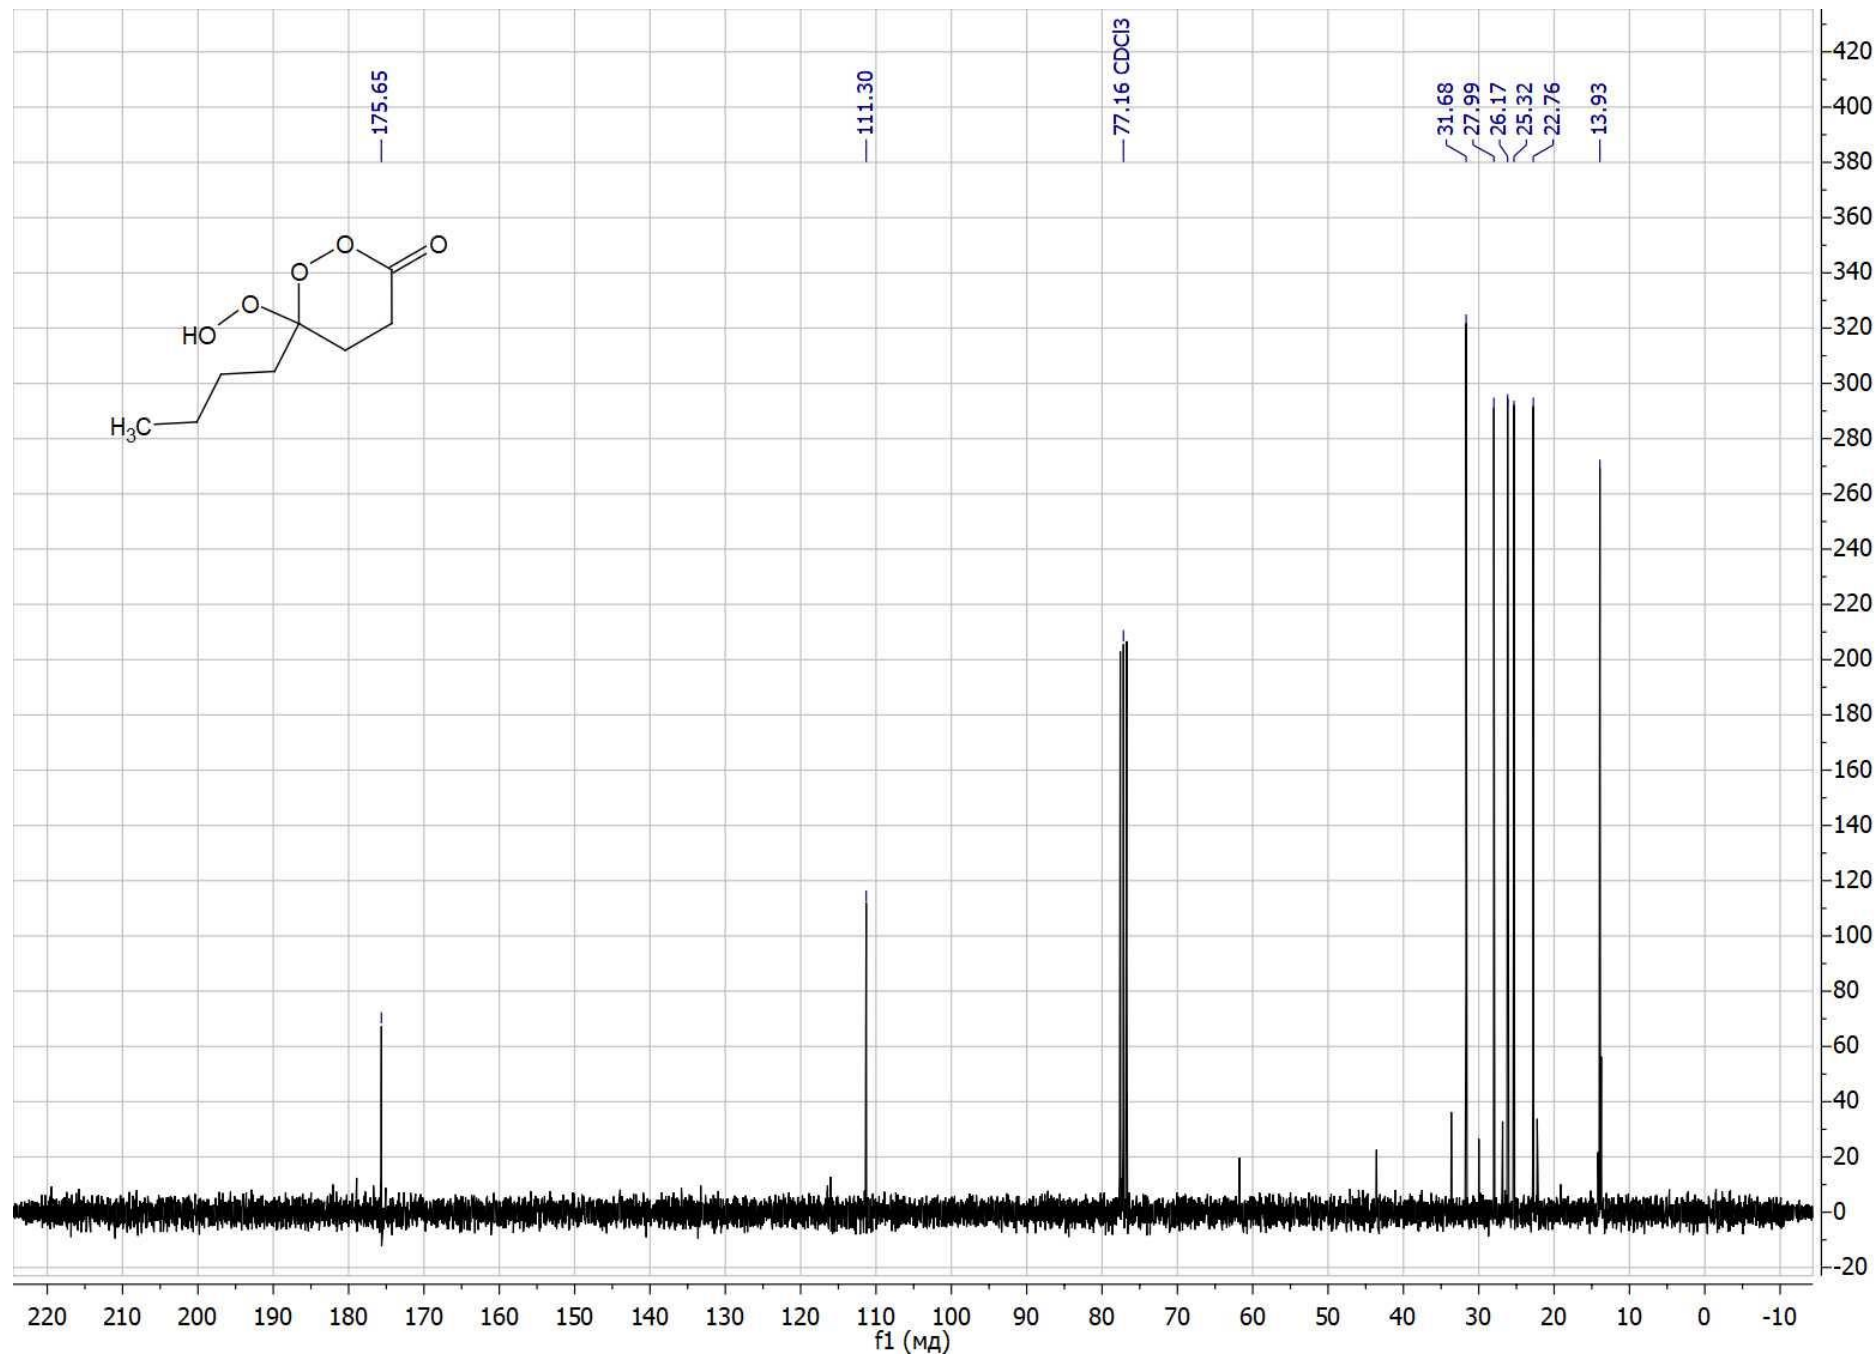

4-Butoxy-4-oxobutanoic acid, 6o

<sup>1</sup>H NMR

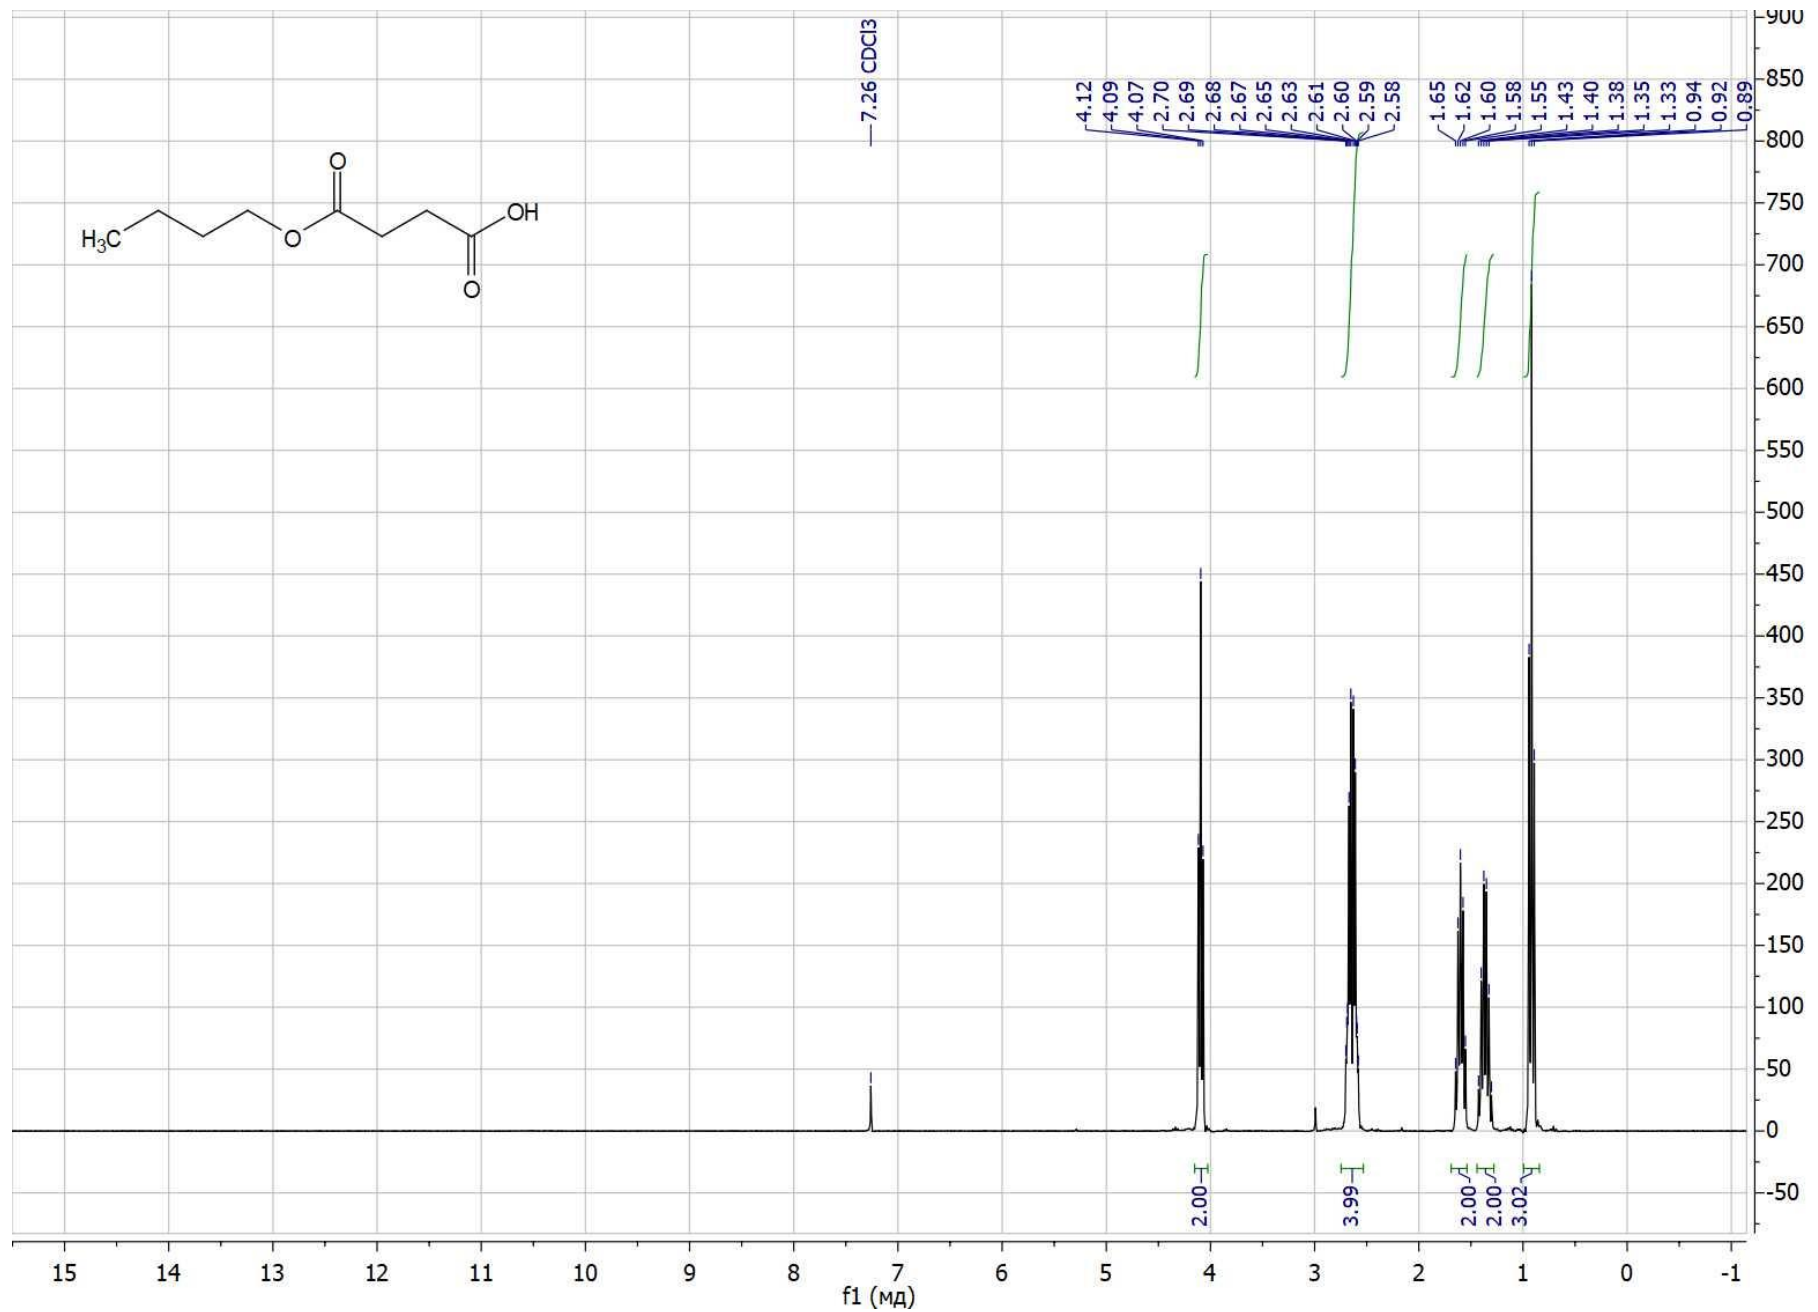

<sup>13</sup>C NMR

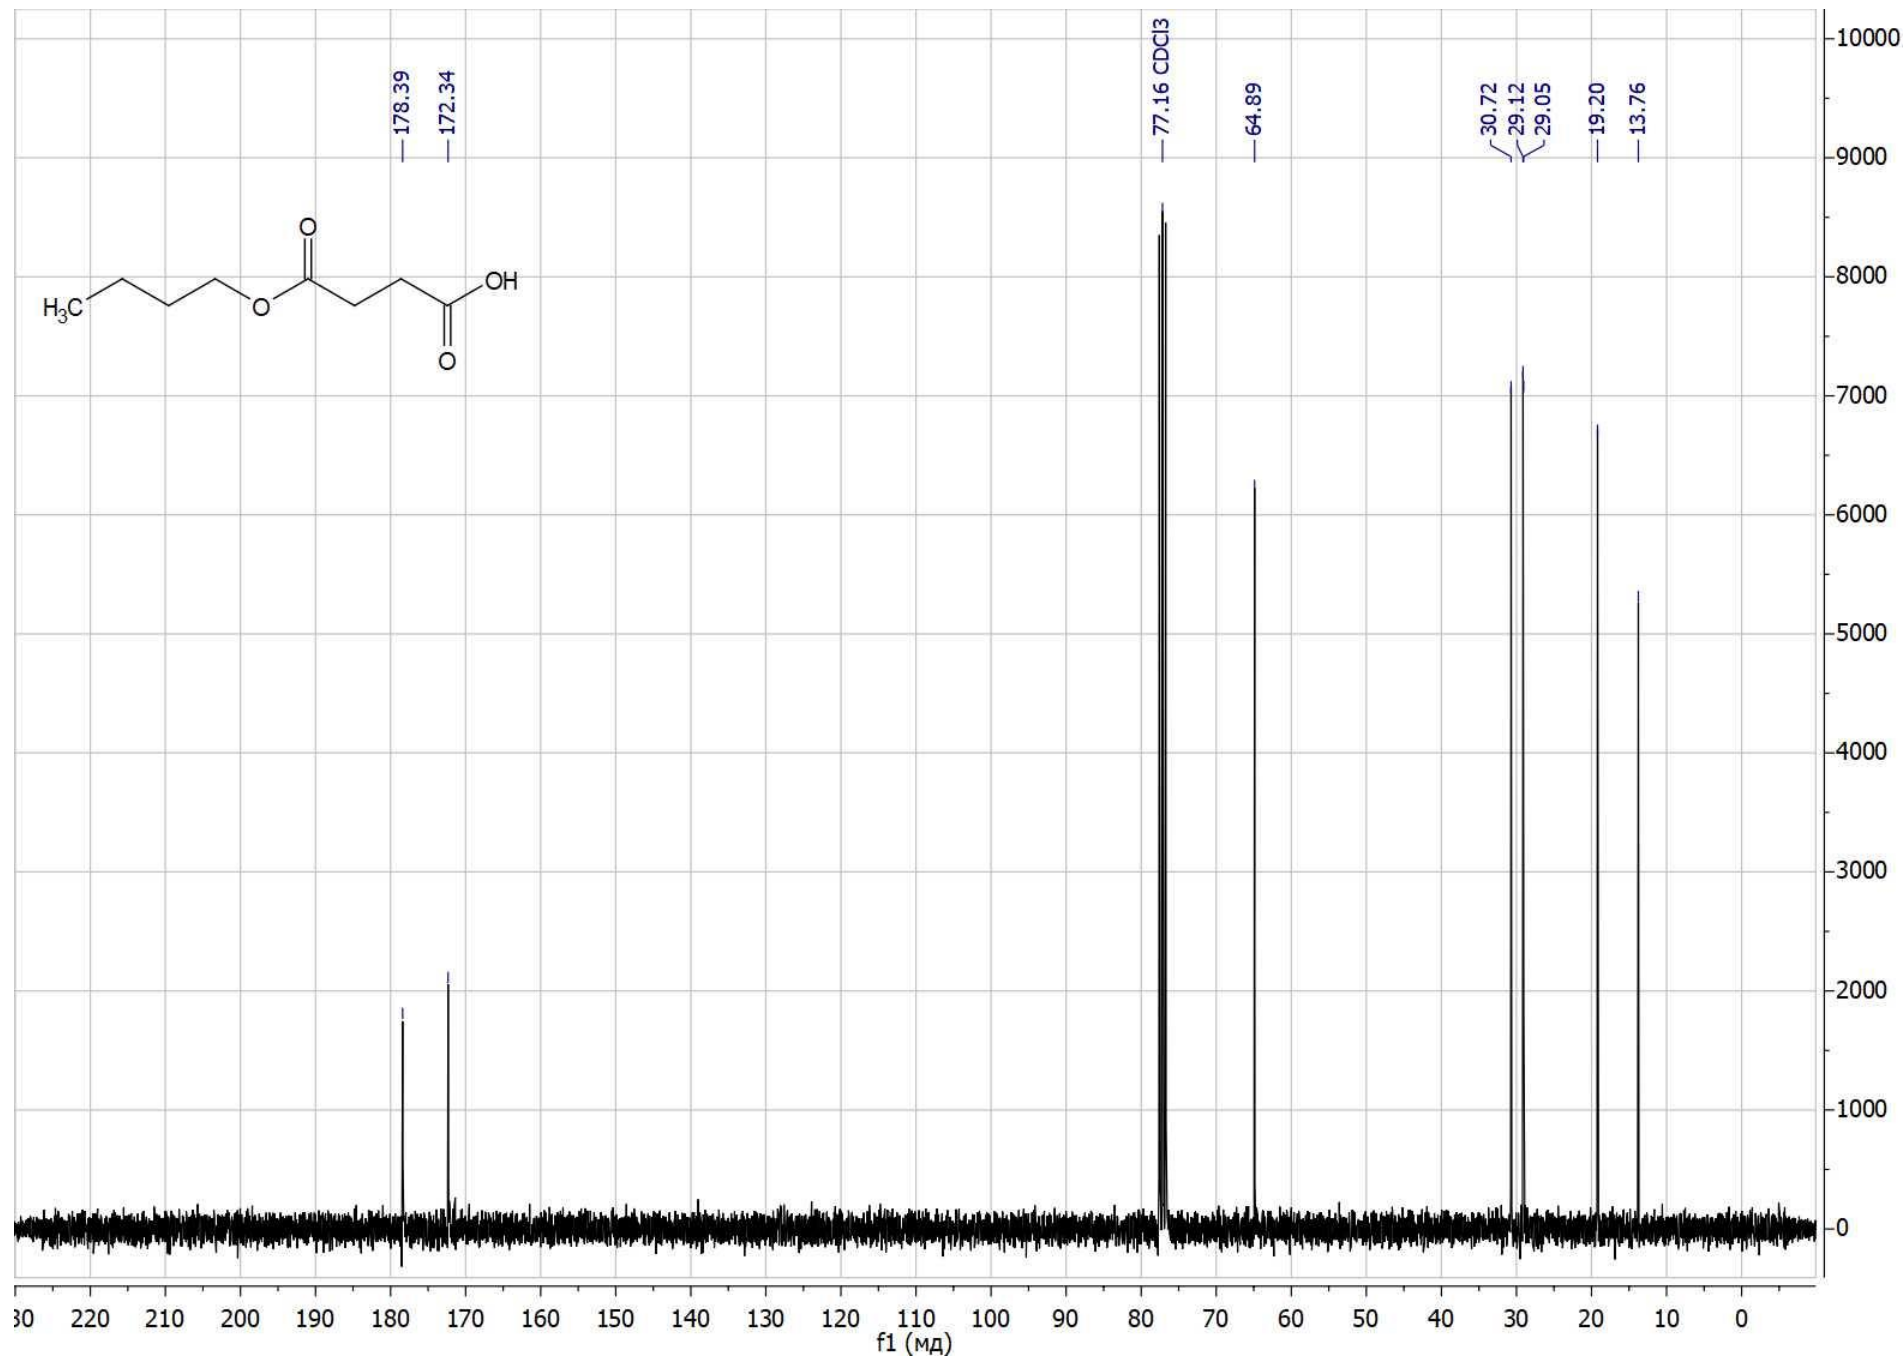

Succinic acid, 7

<sup>1</sup>H NMR

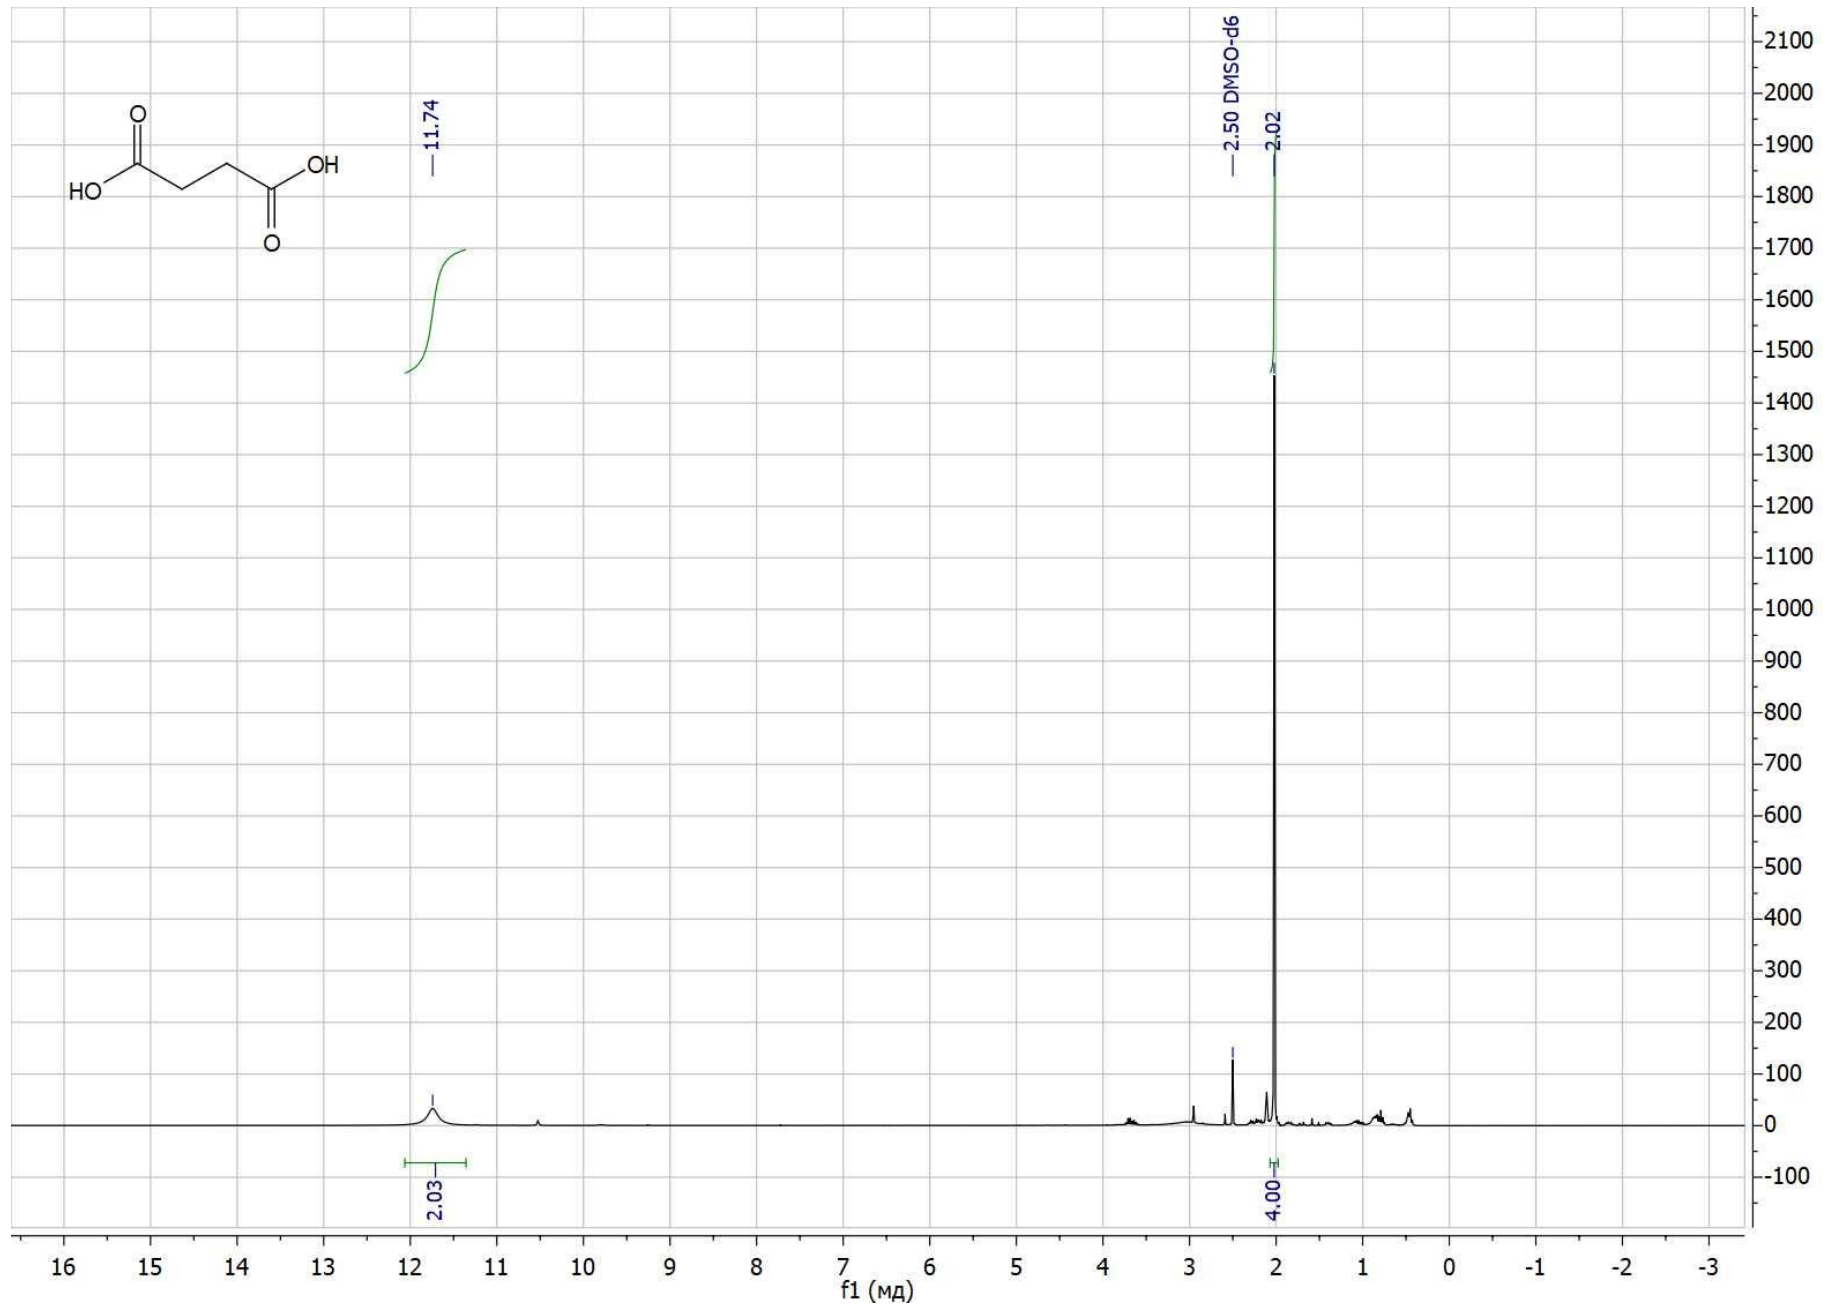

<sup>13</sup>C NMR

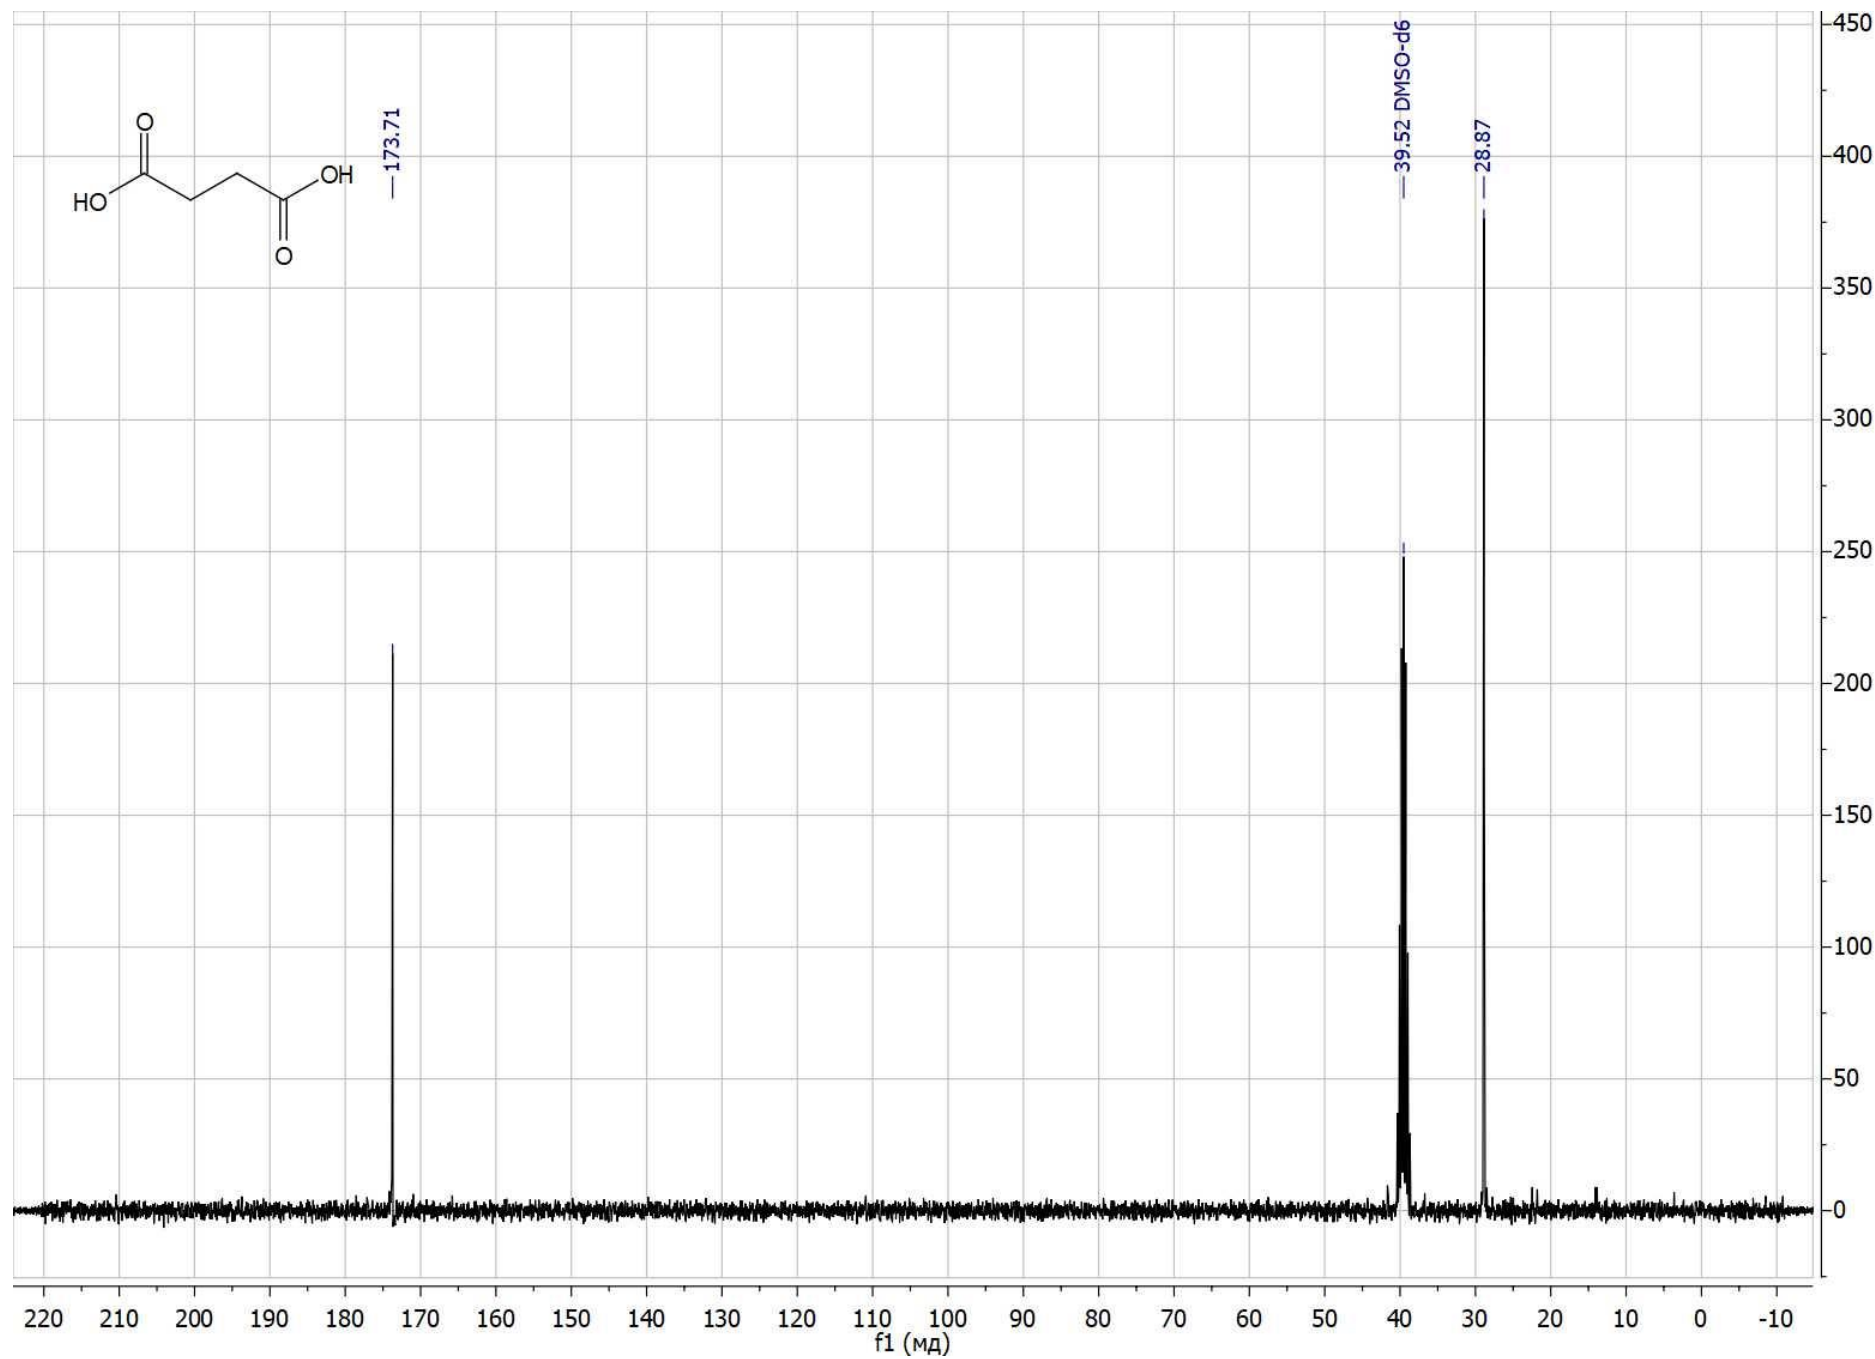

Phenol  
<sup>1</sup>H NMR

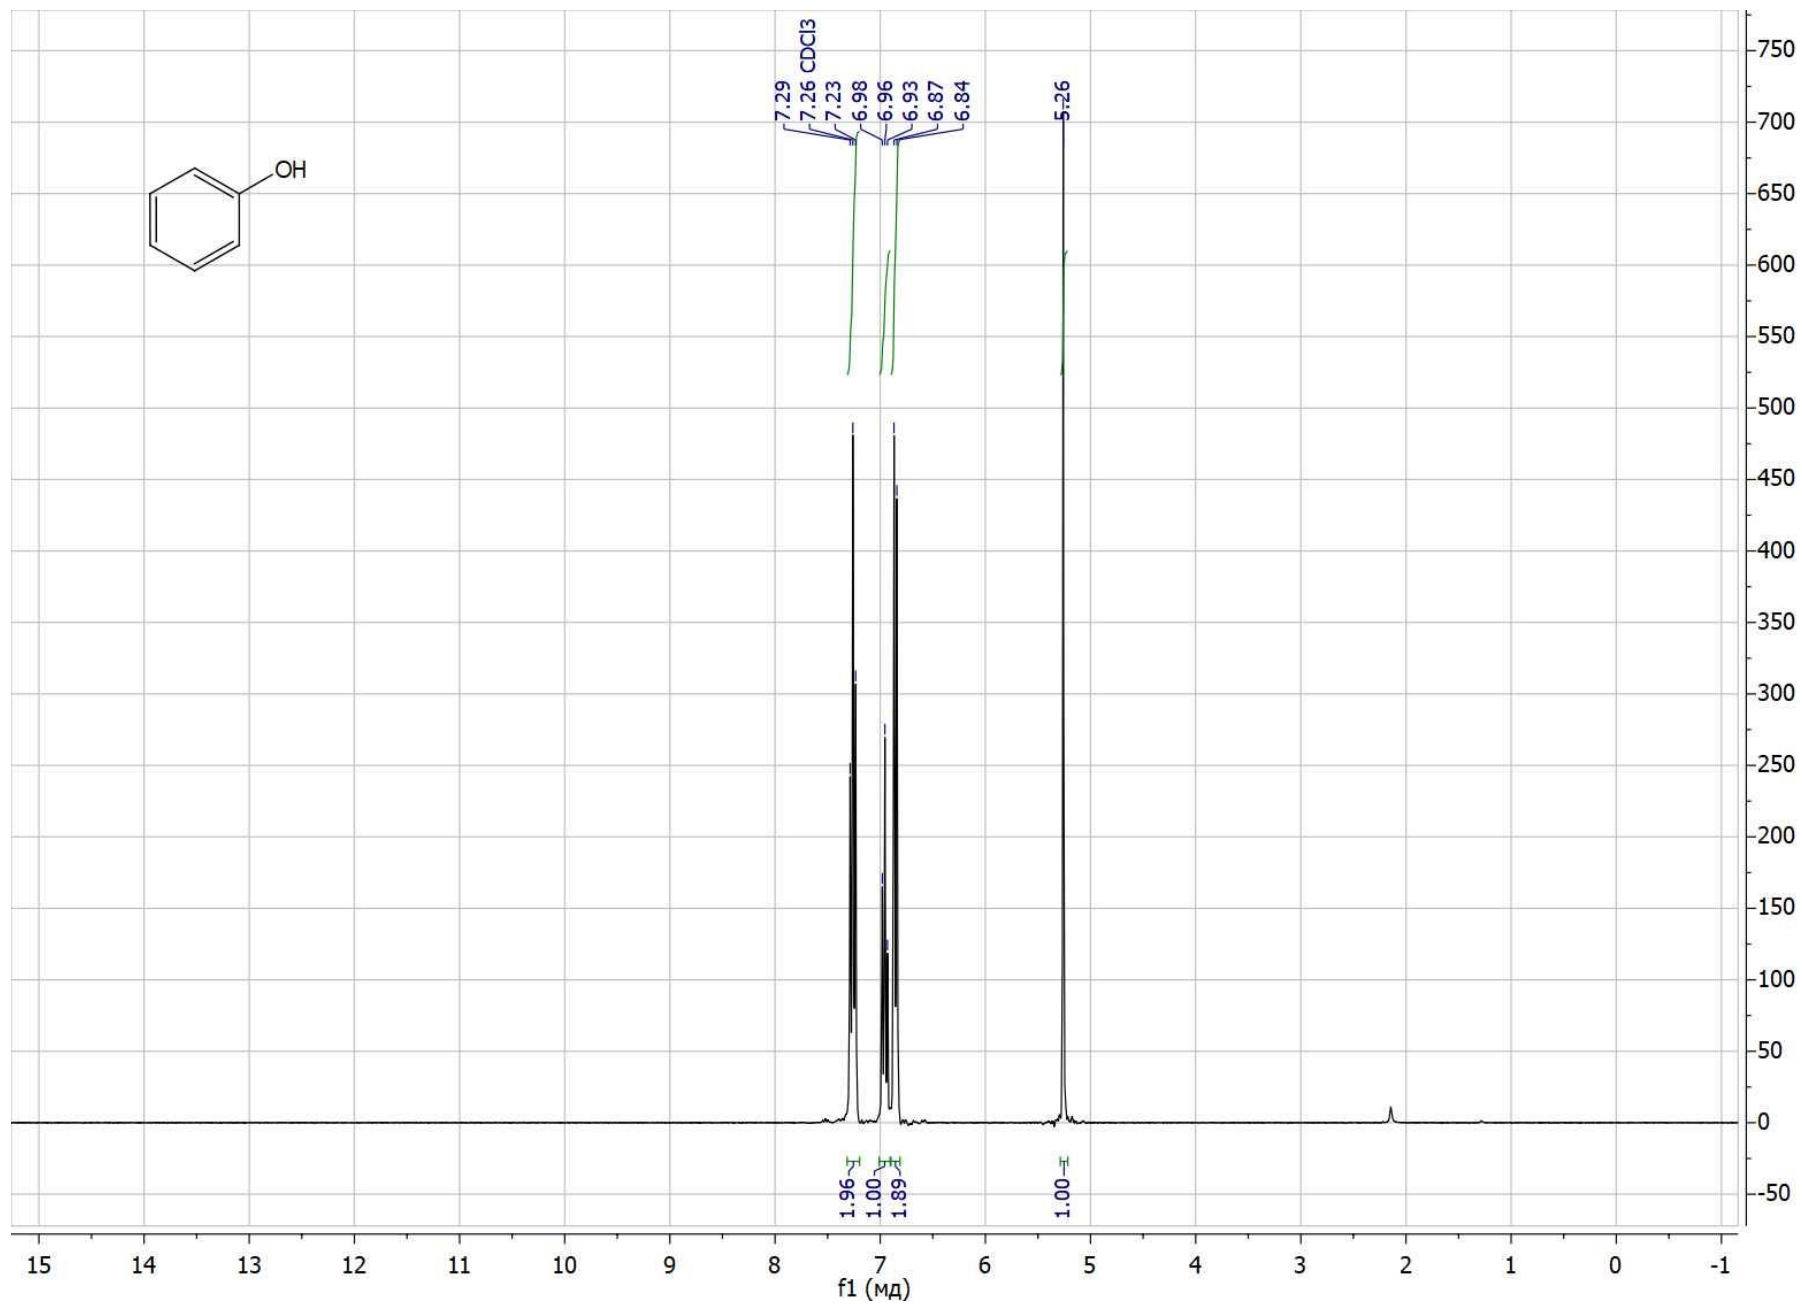



<sup>13</sup>C NMR

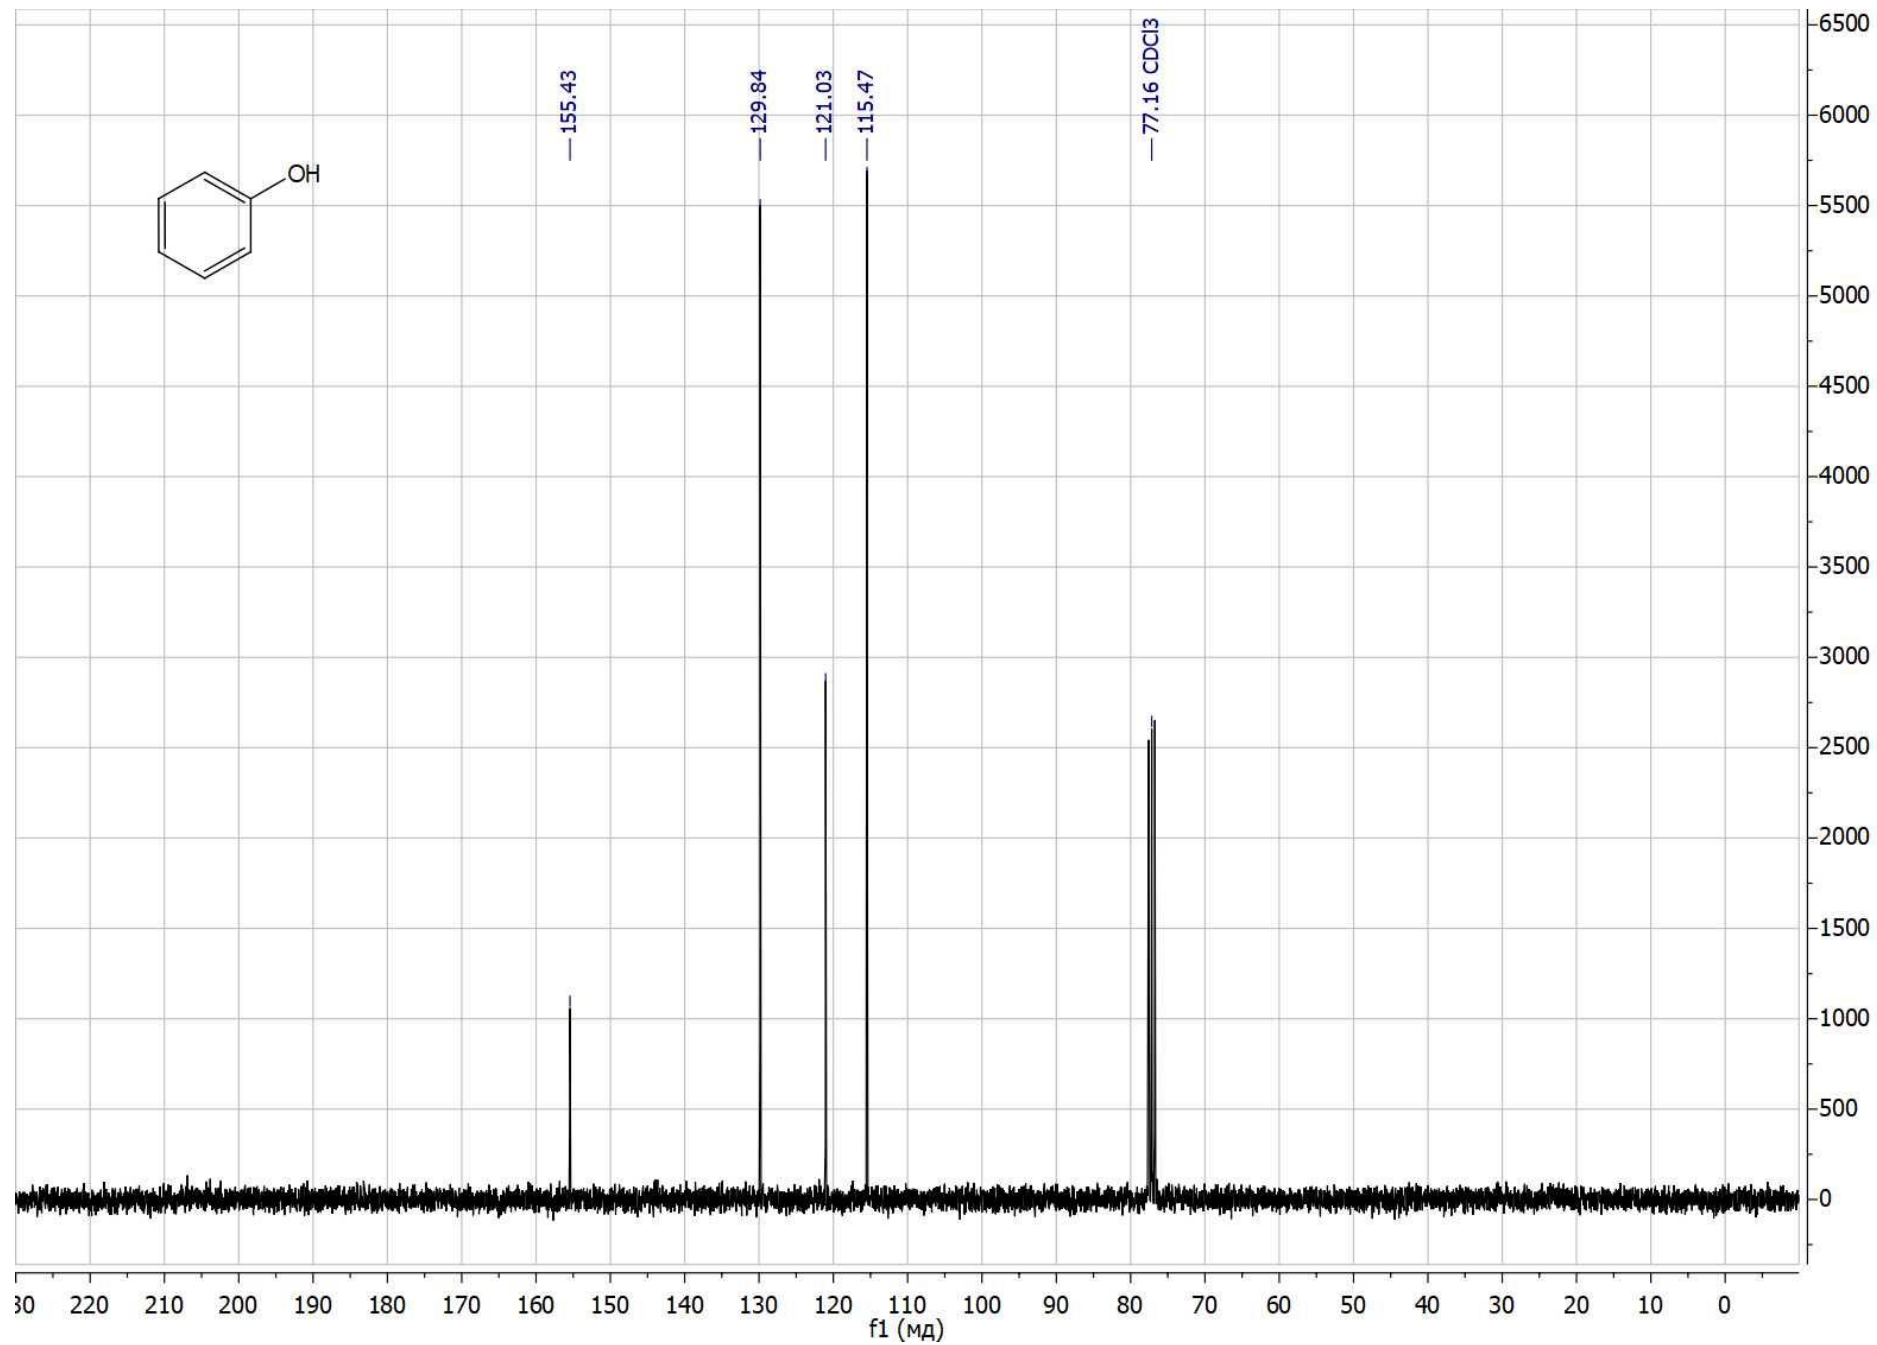

5-Benzyl-6-hydroxy-6-methyl-1,2-dioxan-3-one, 3a

<sup>1</sup>H NMR

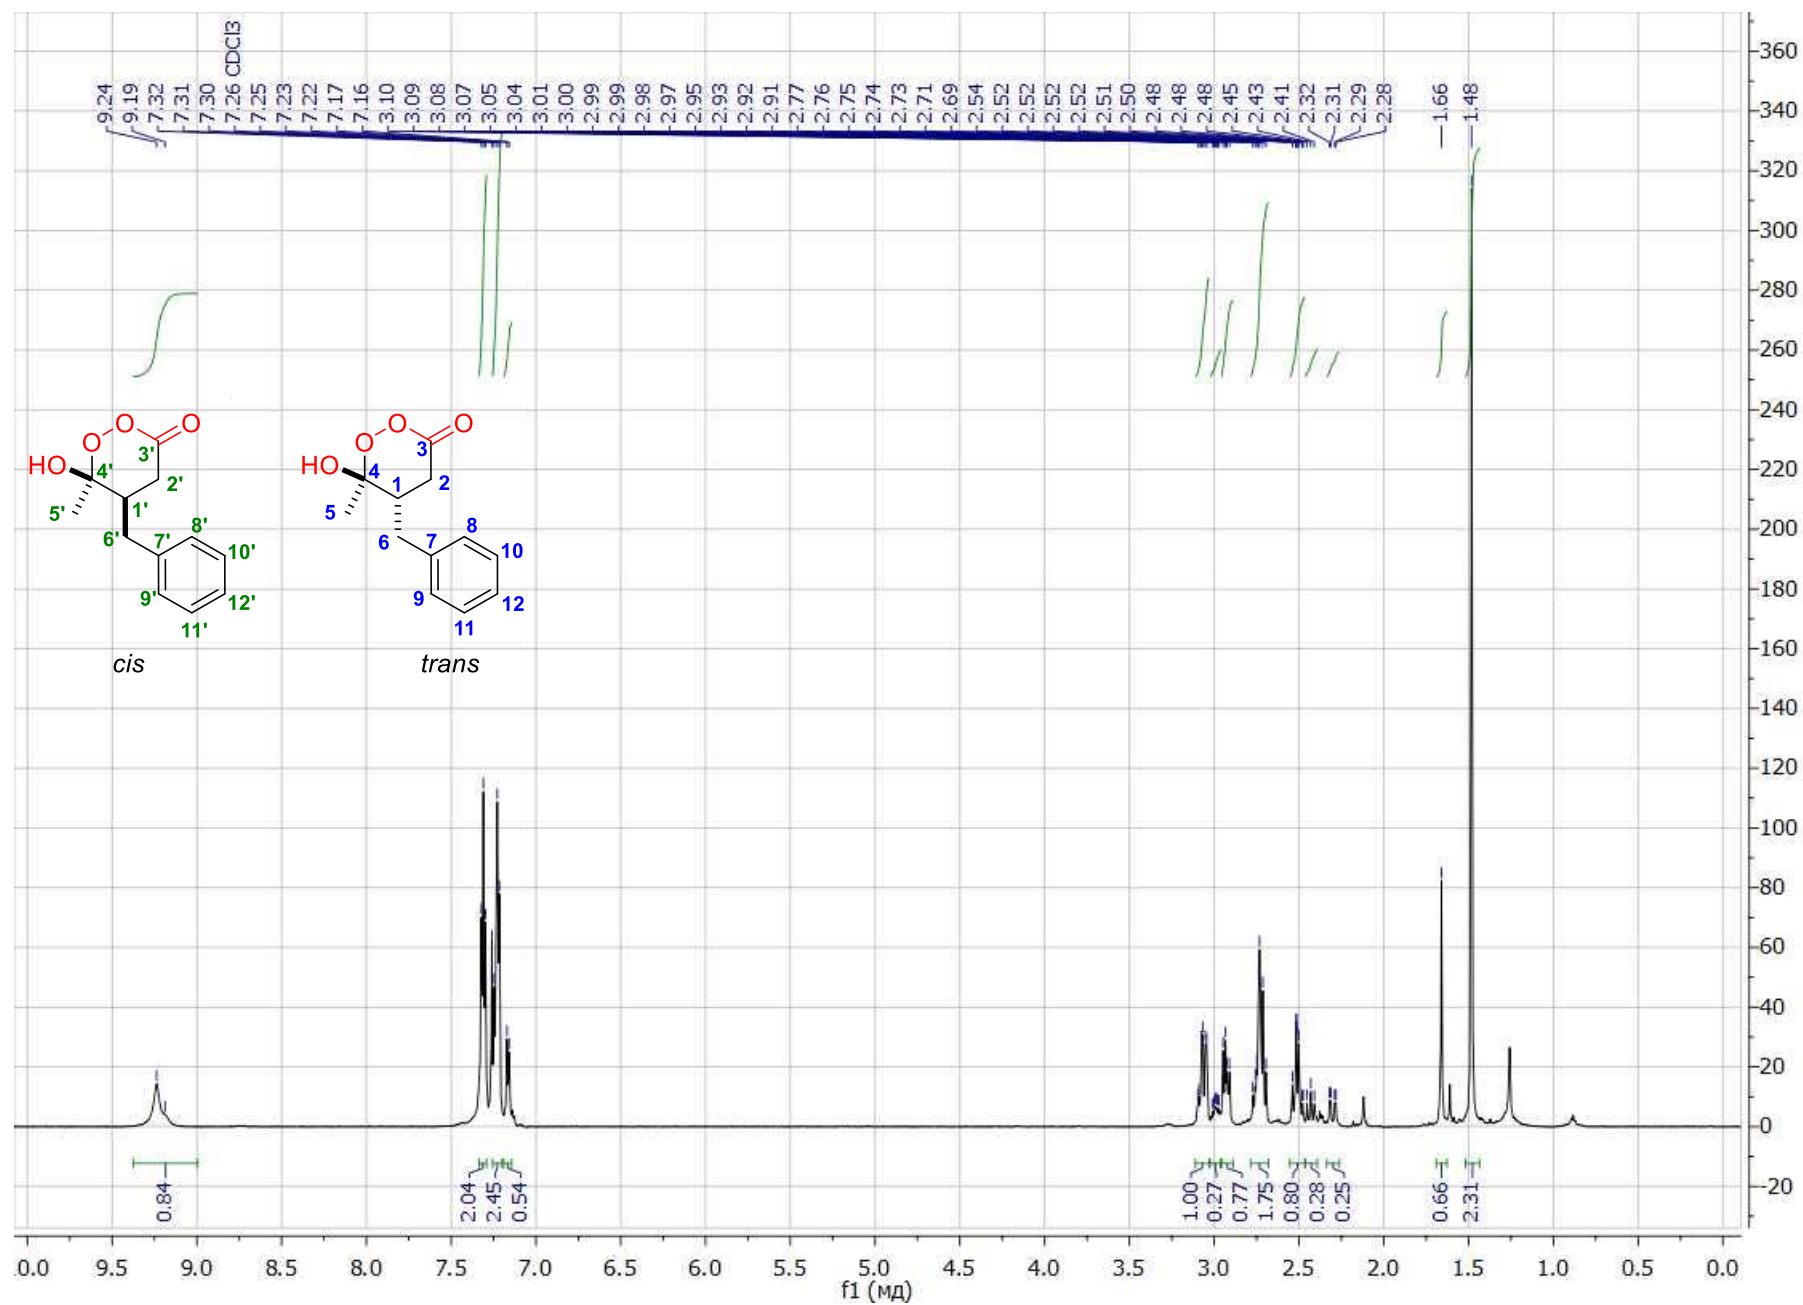

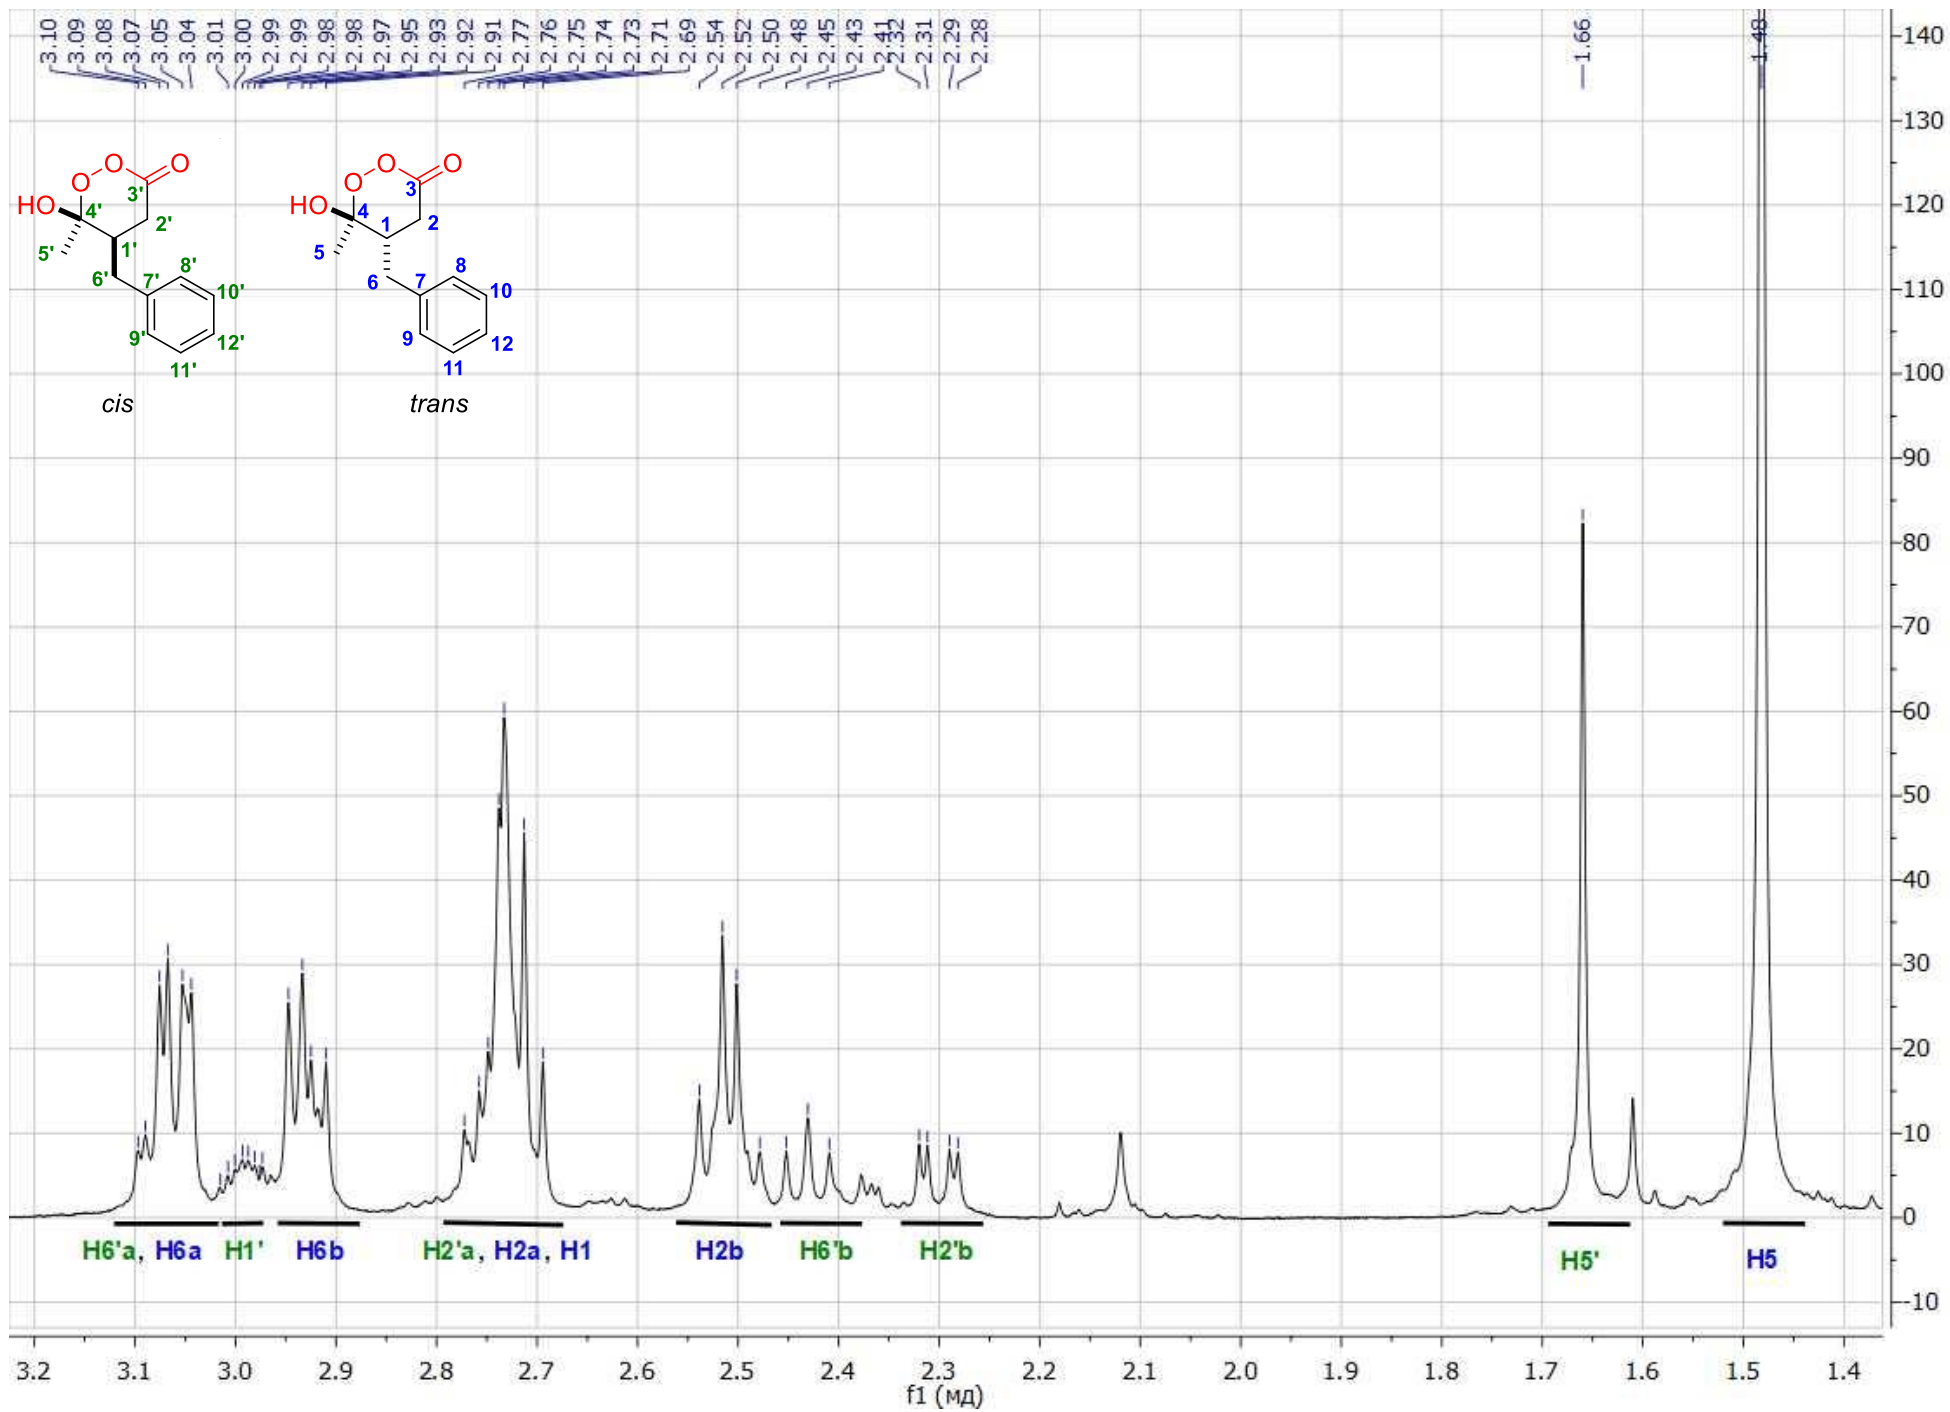

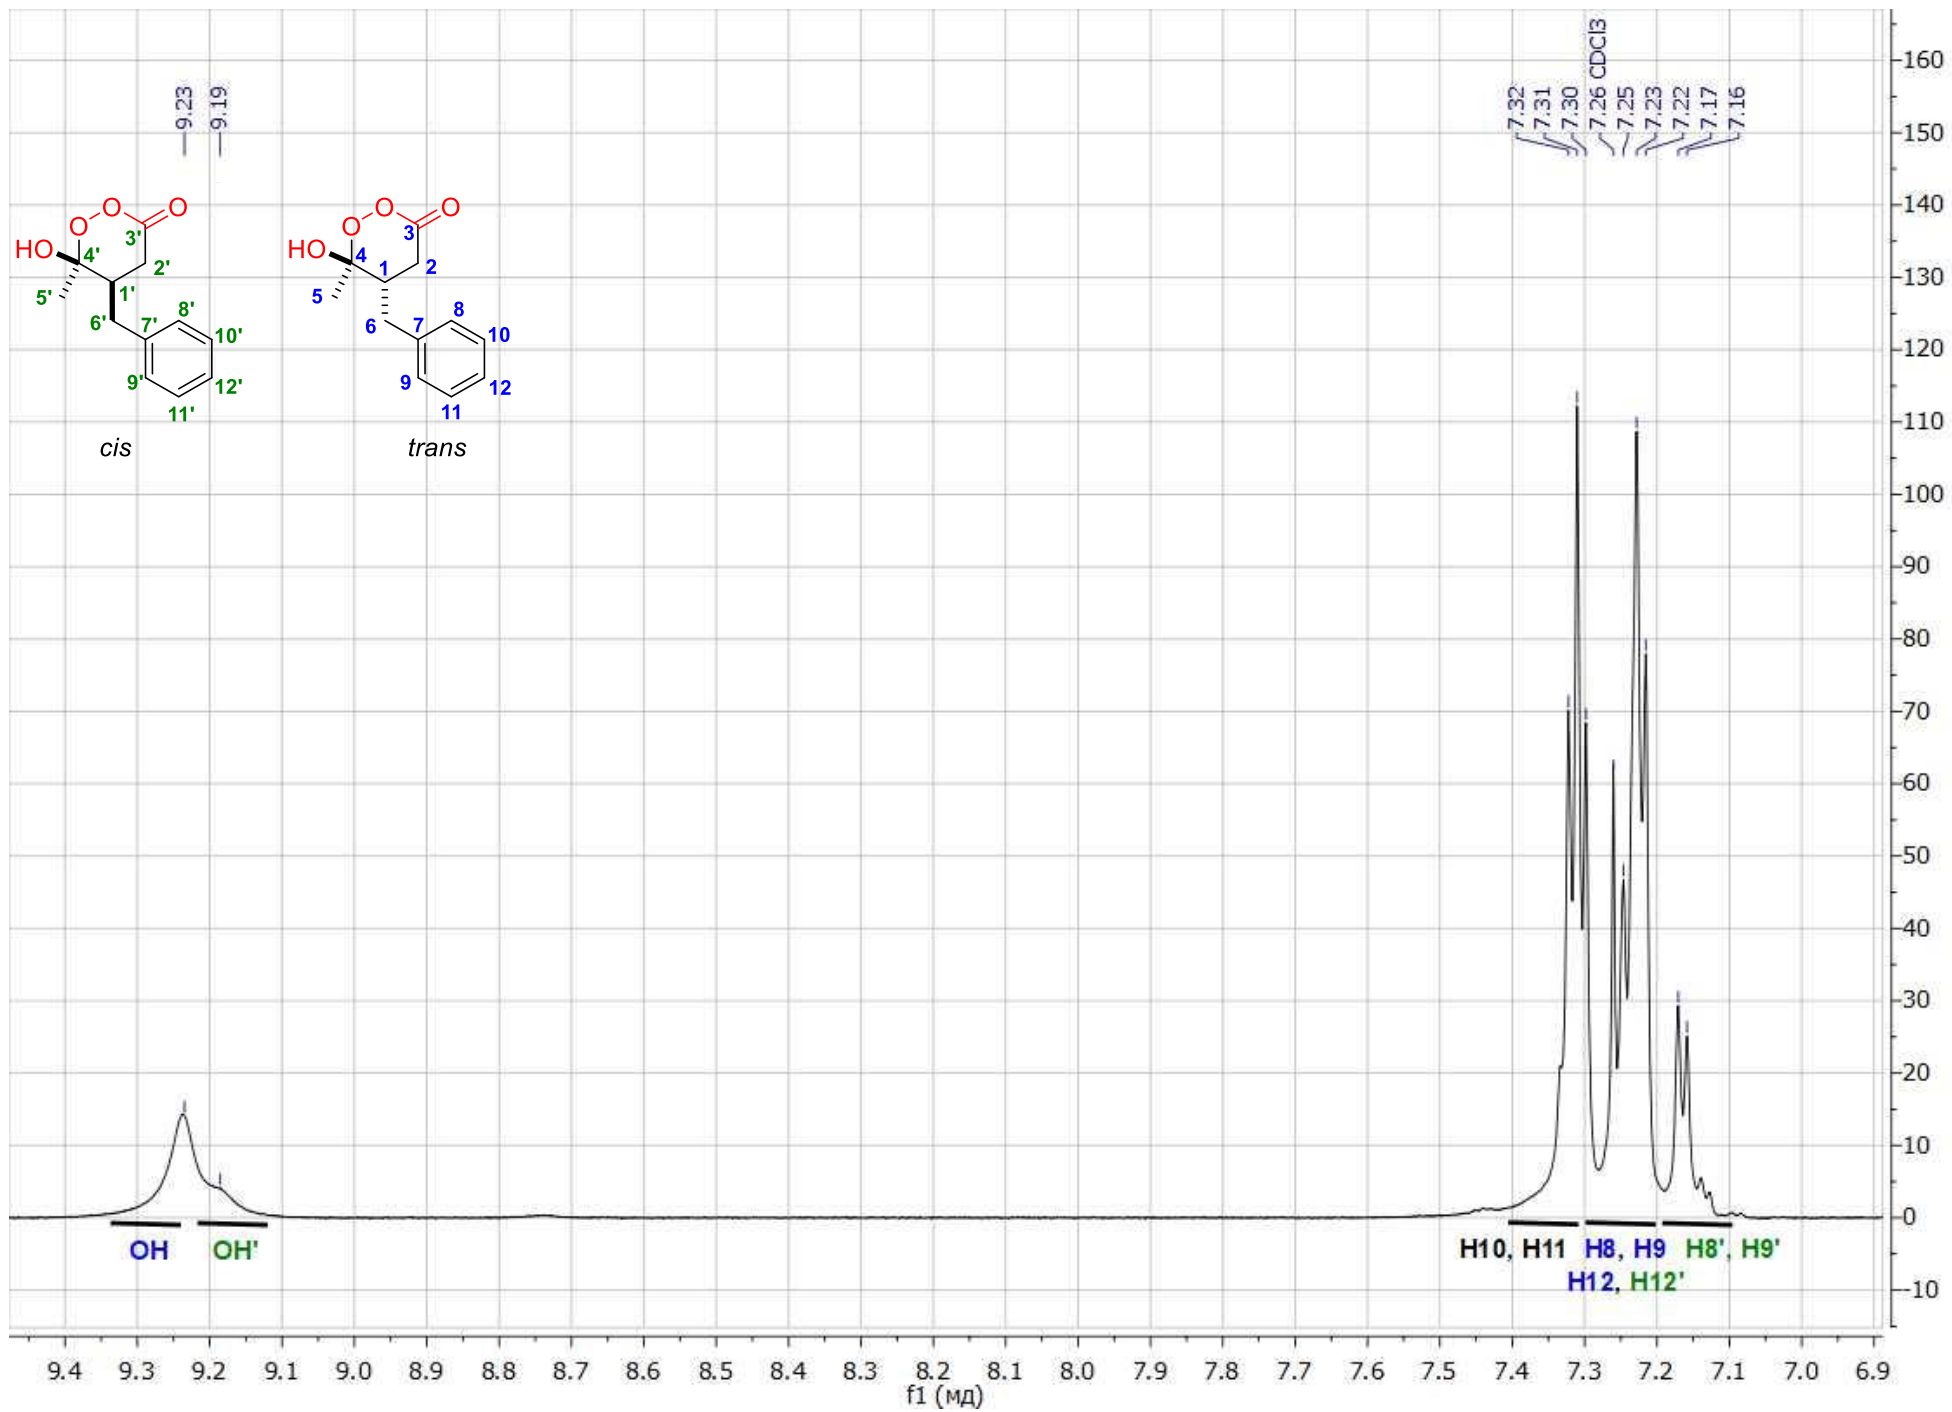

# <sup>13</sup>C NMR

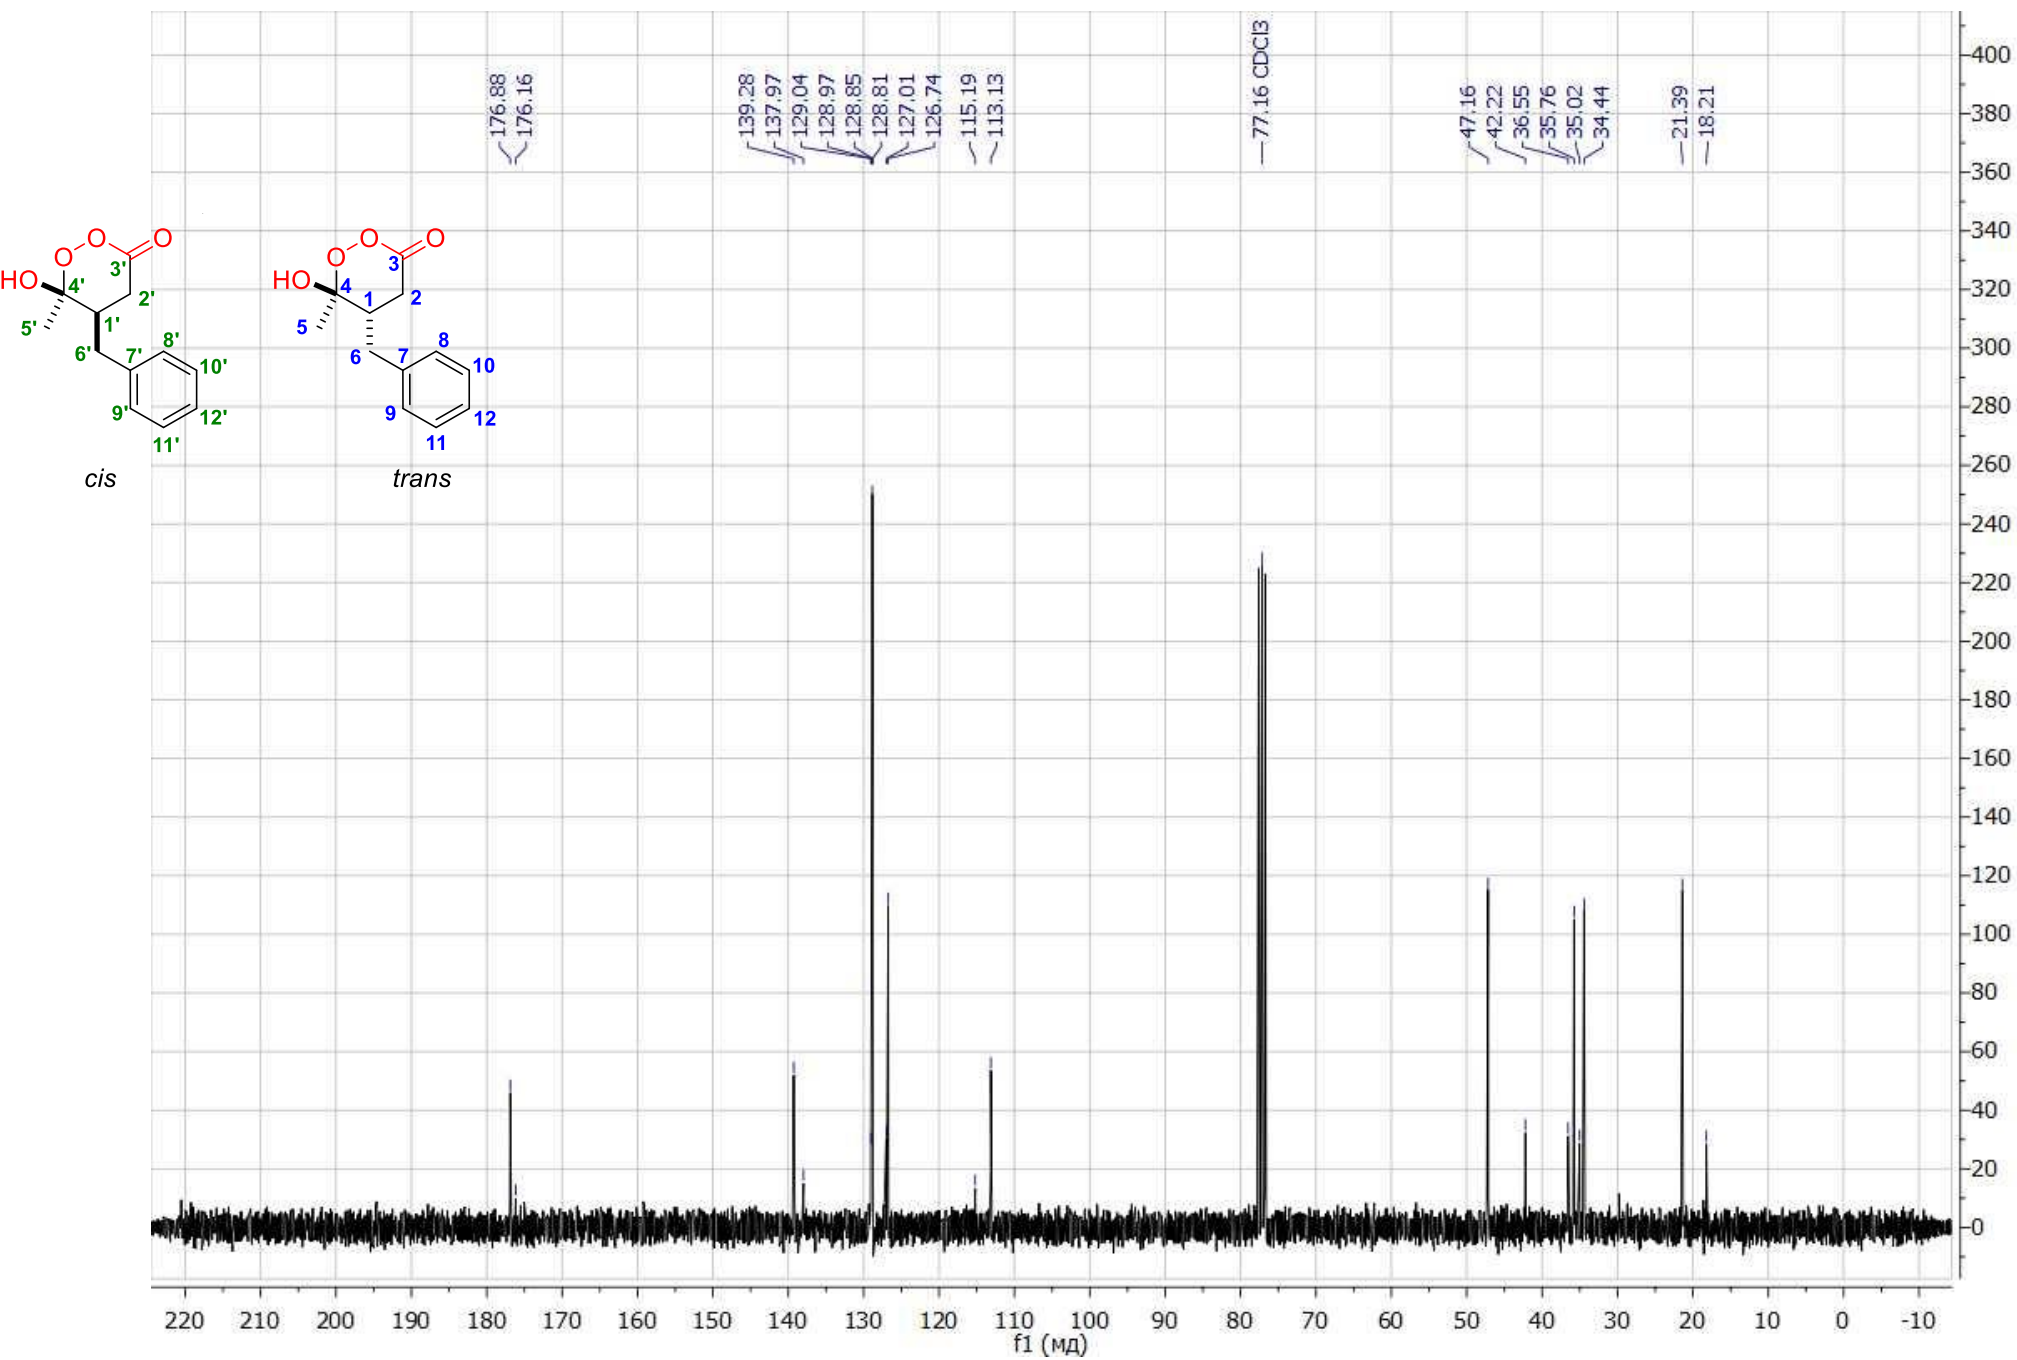

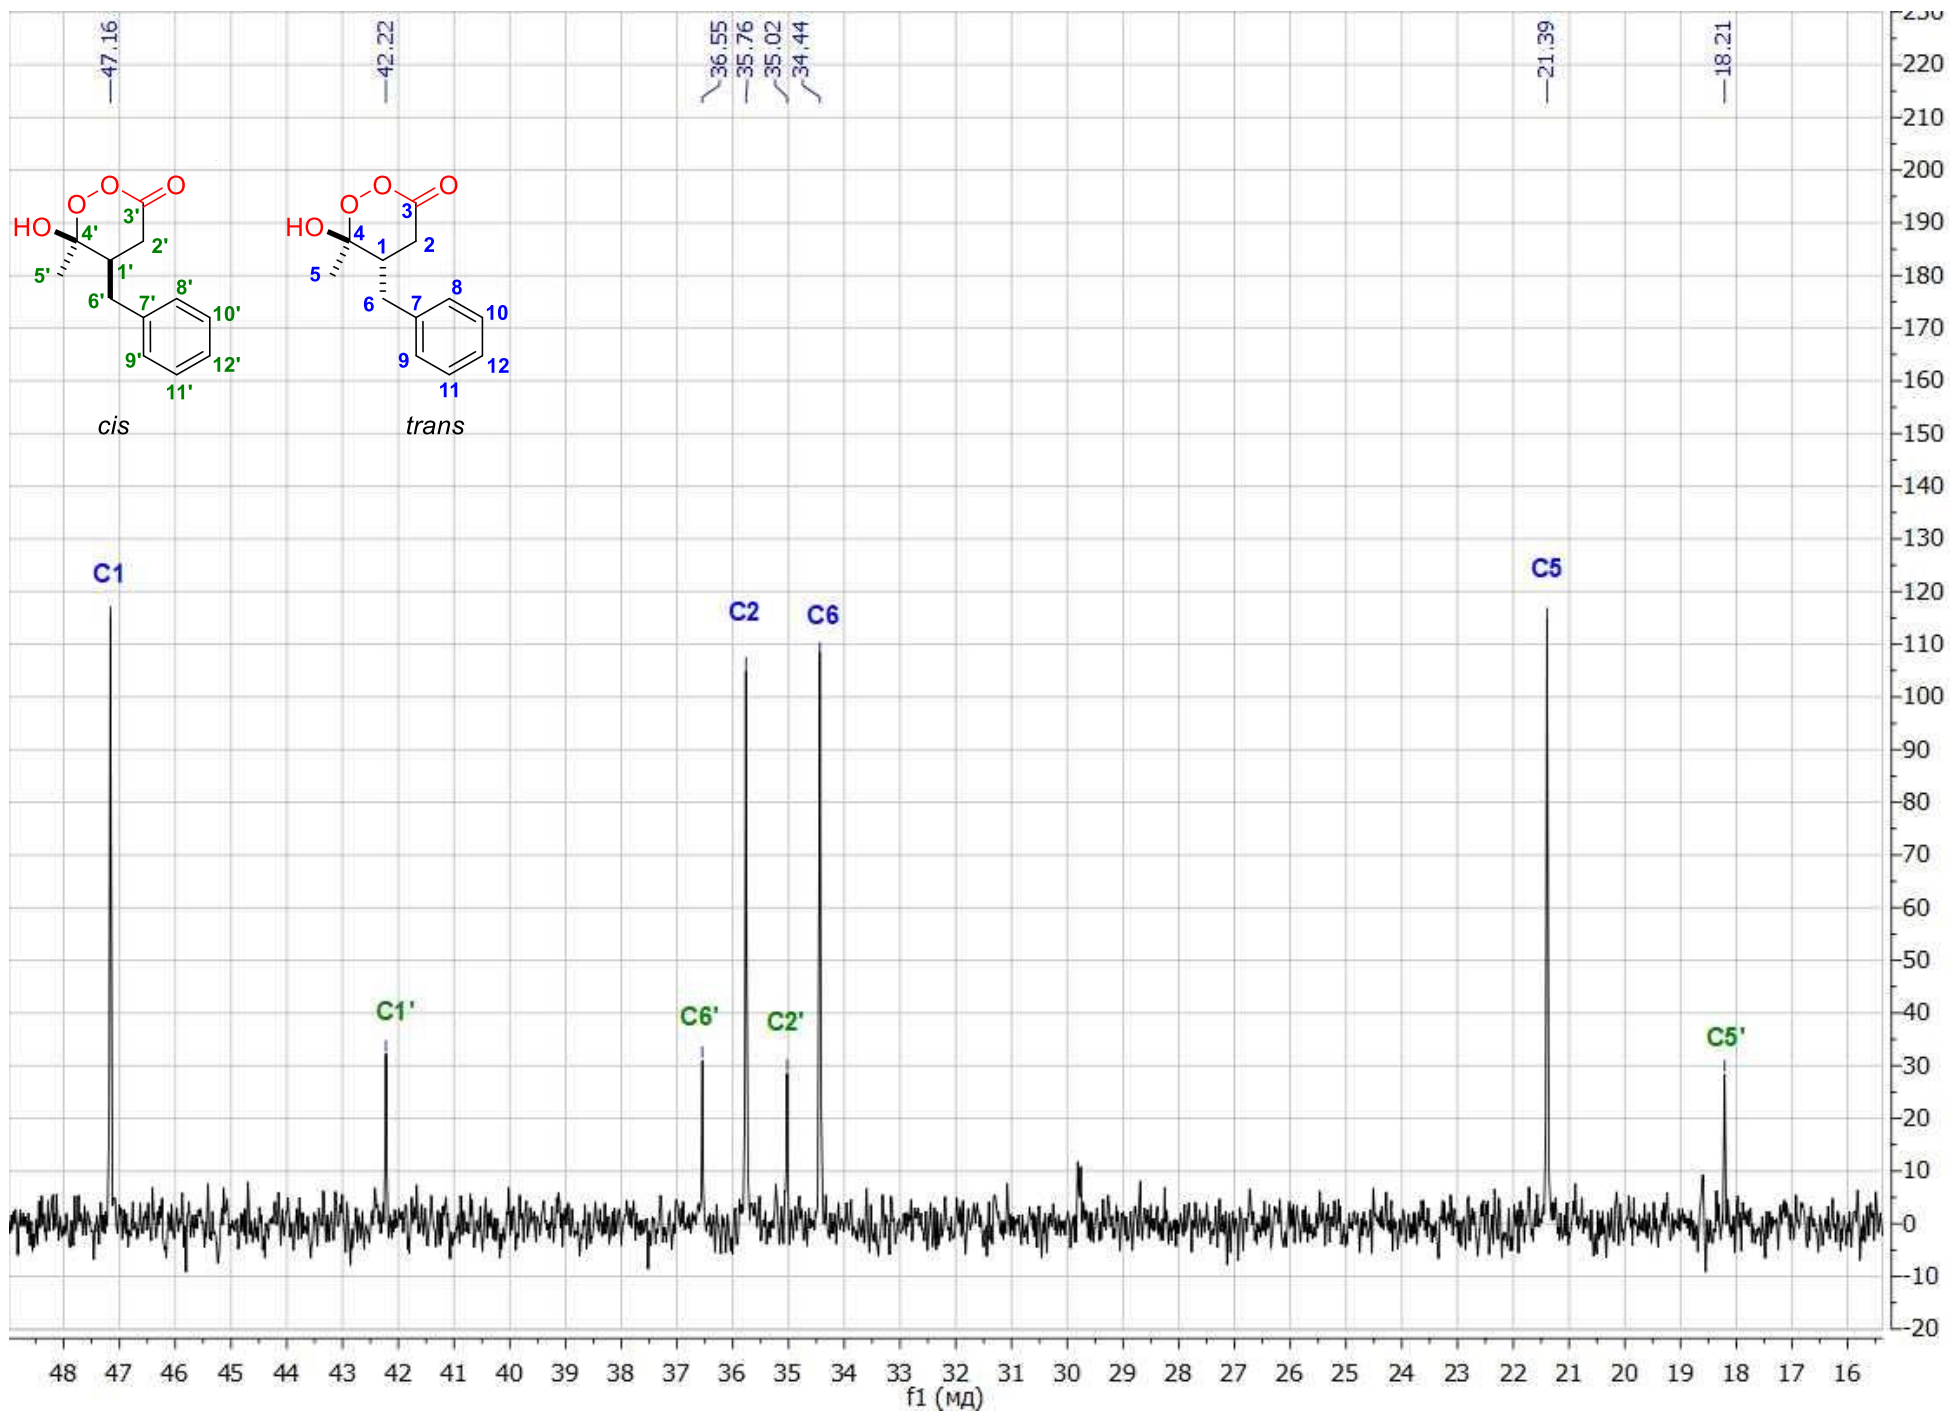

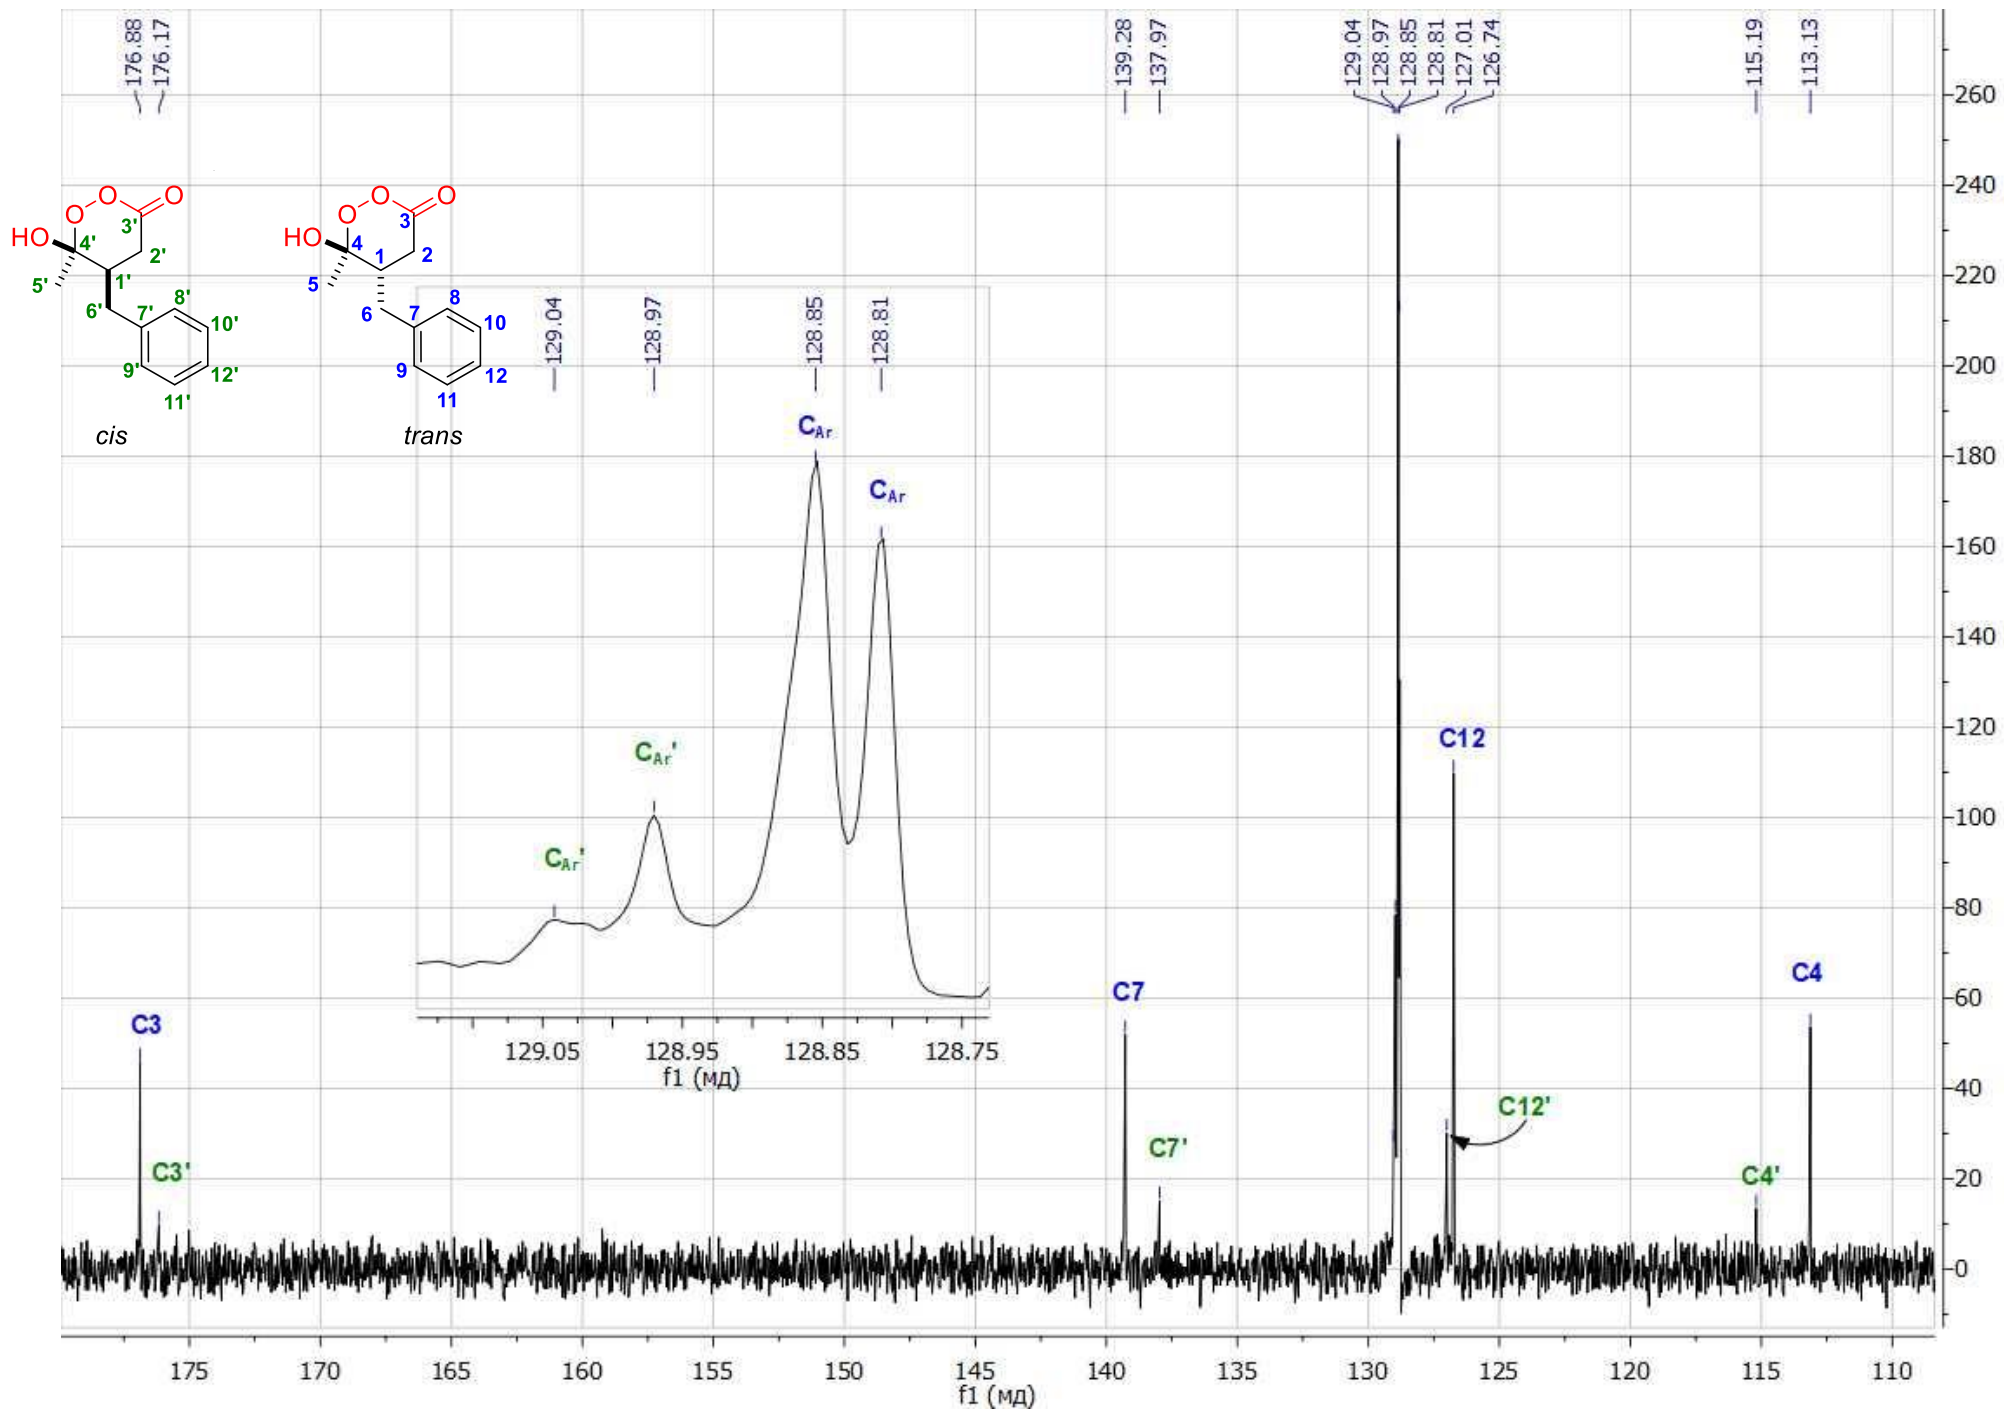

<sup>13</sup>C\_deptsp135

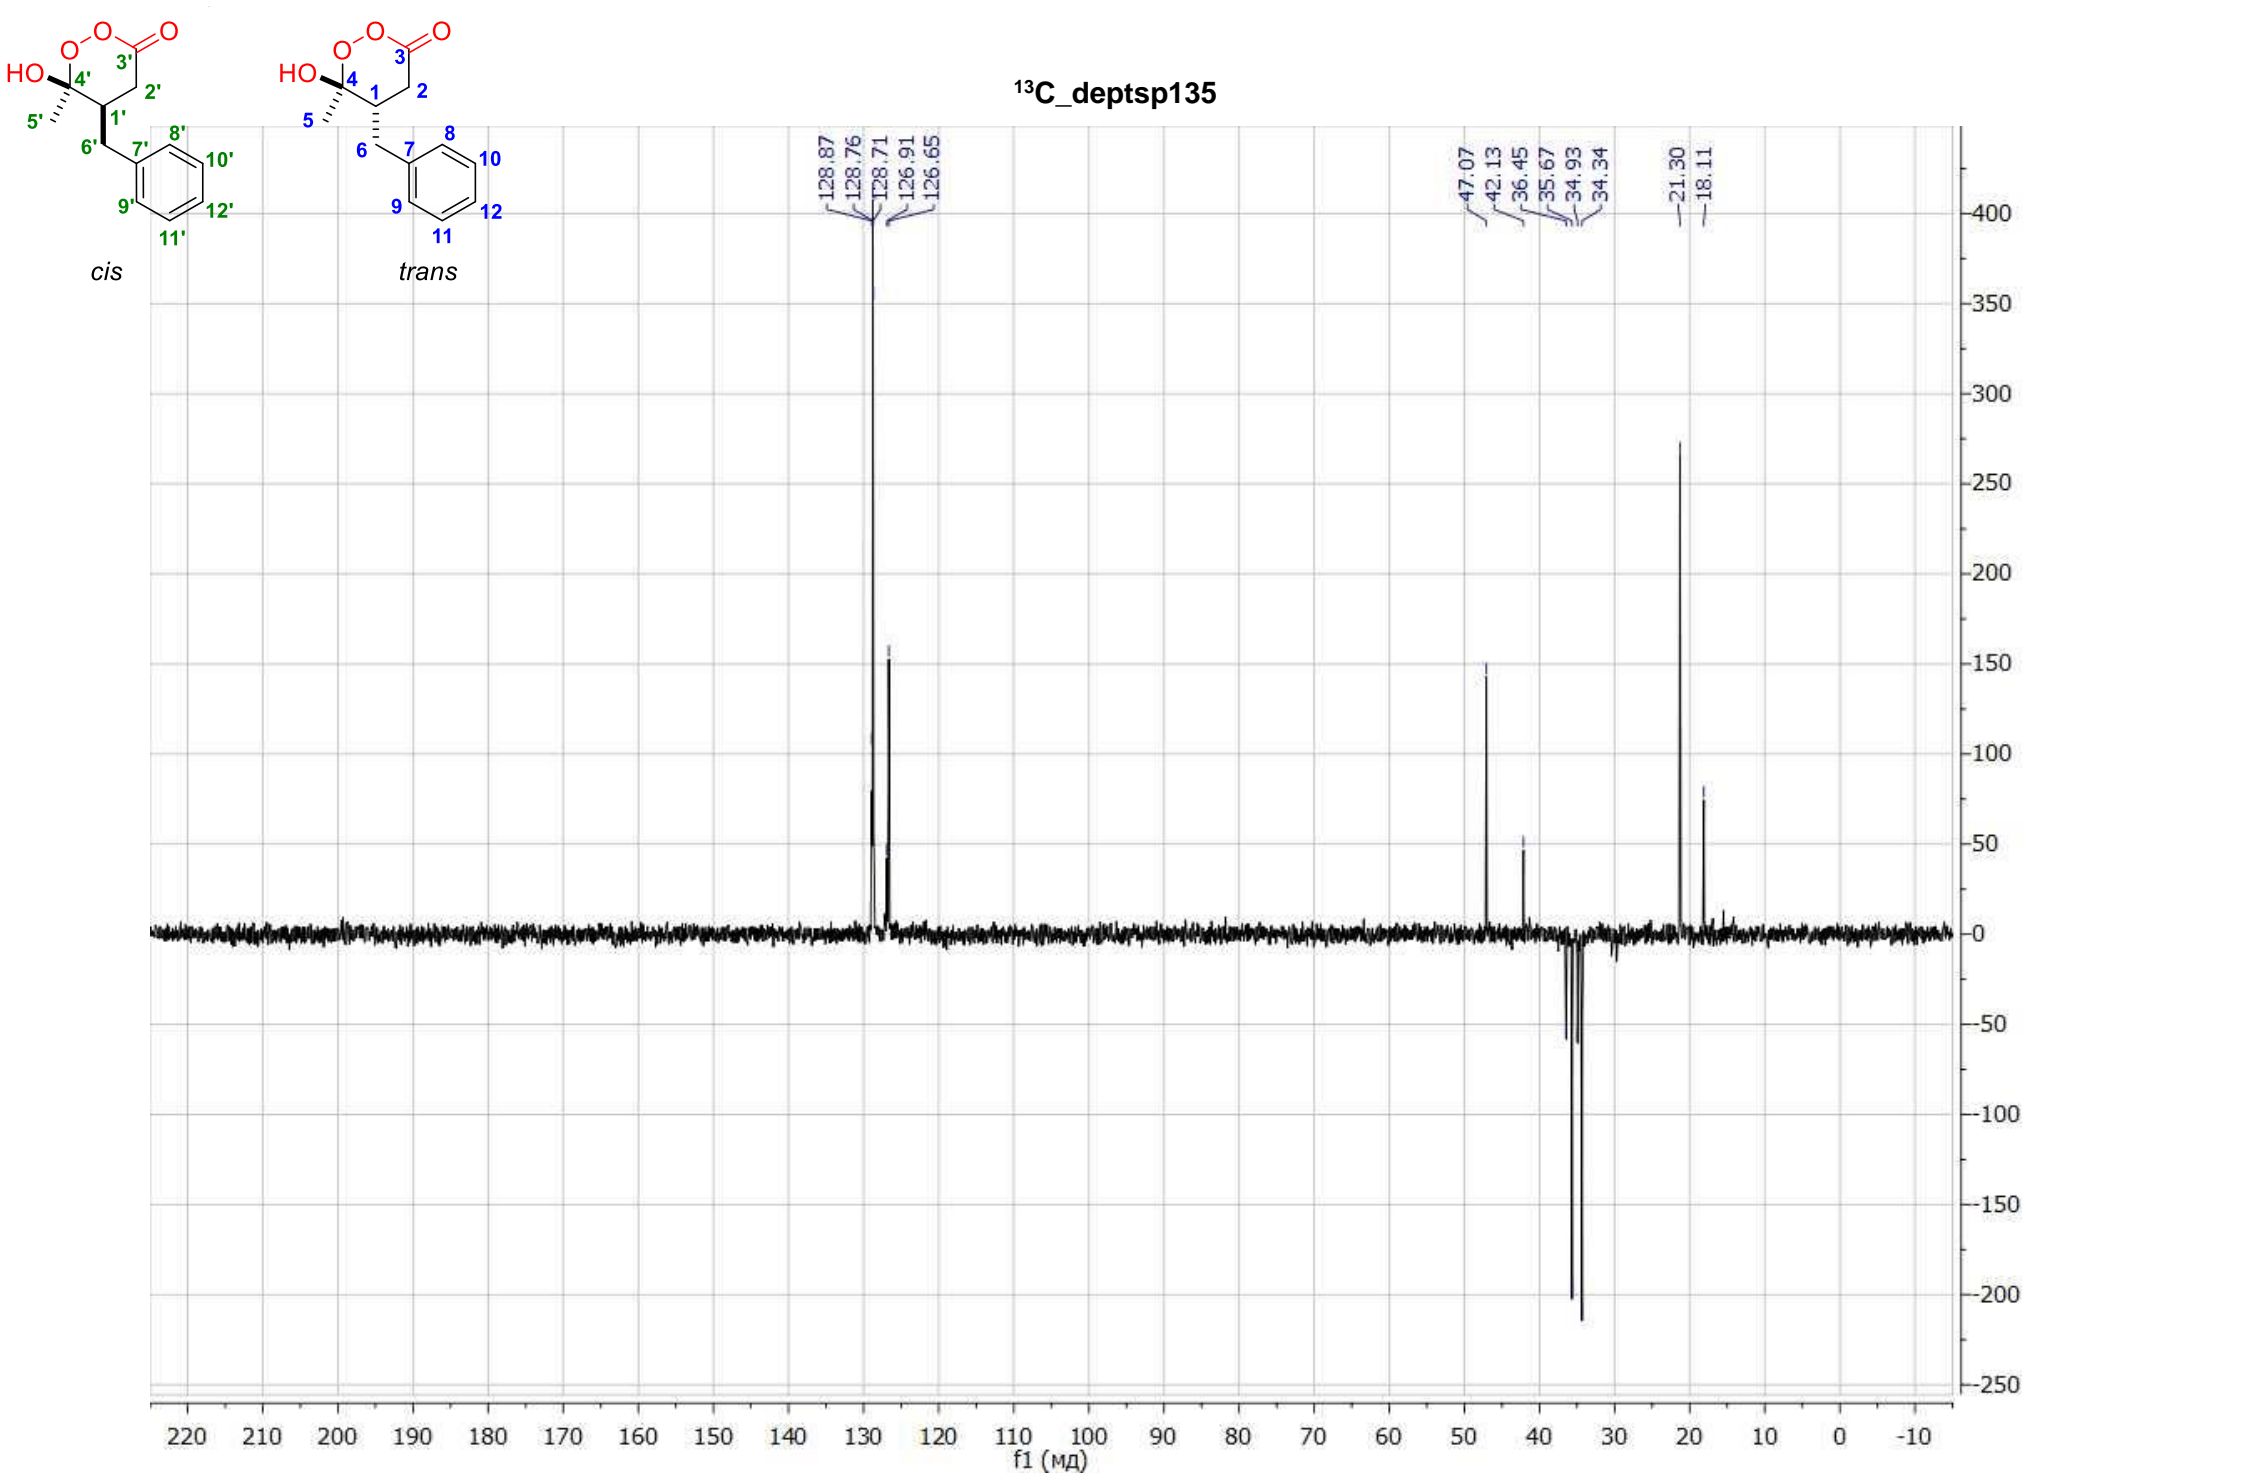



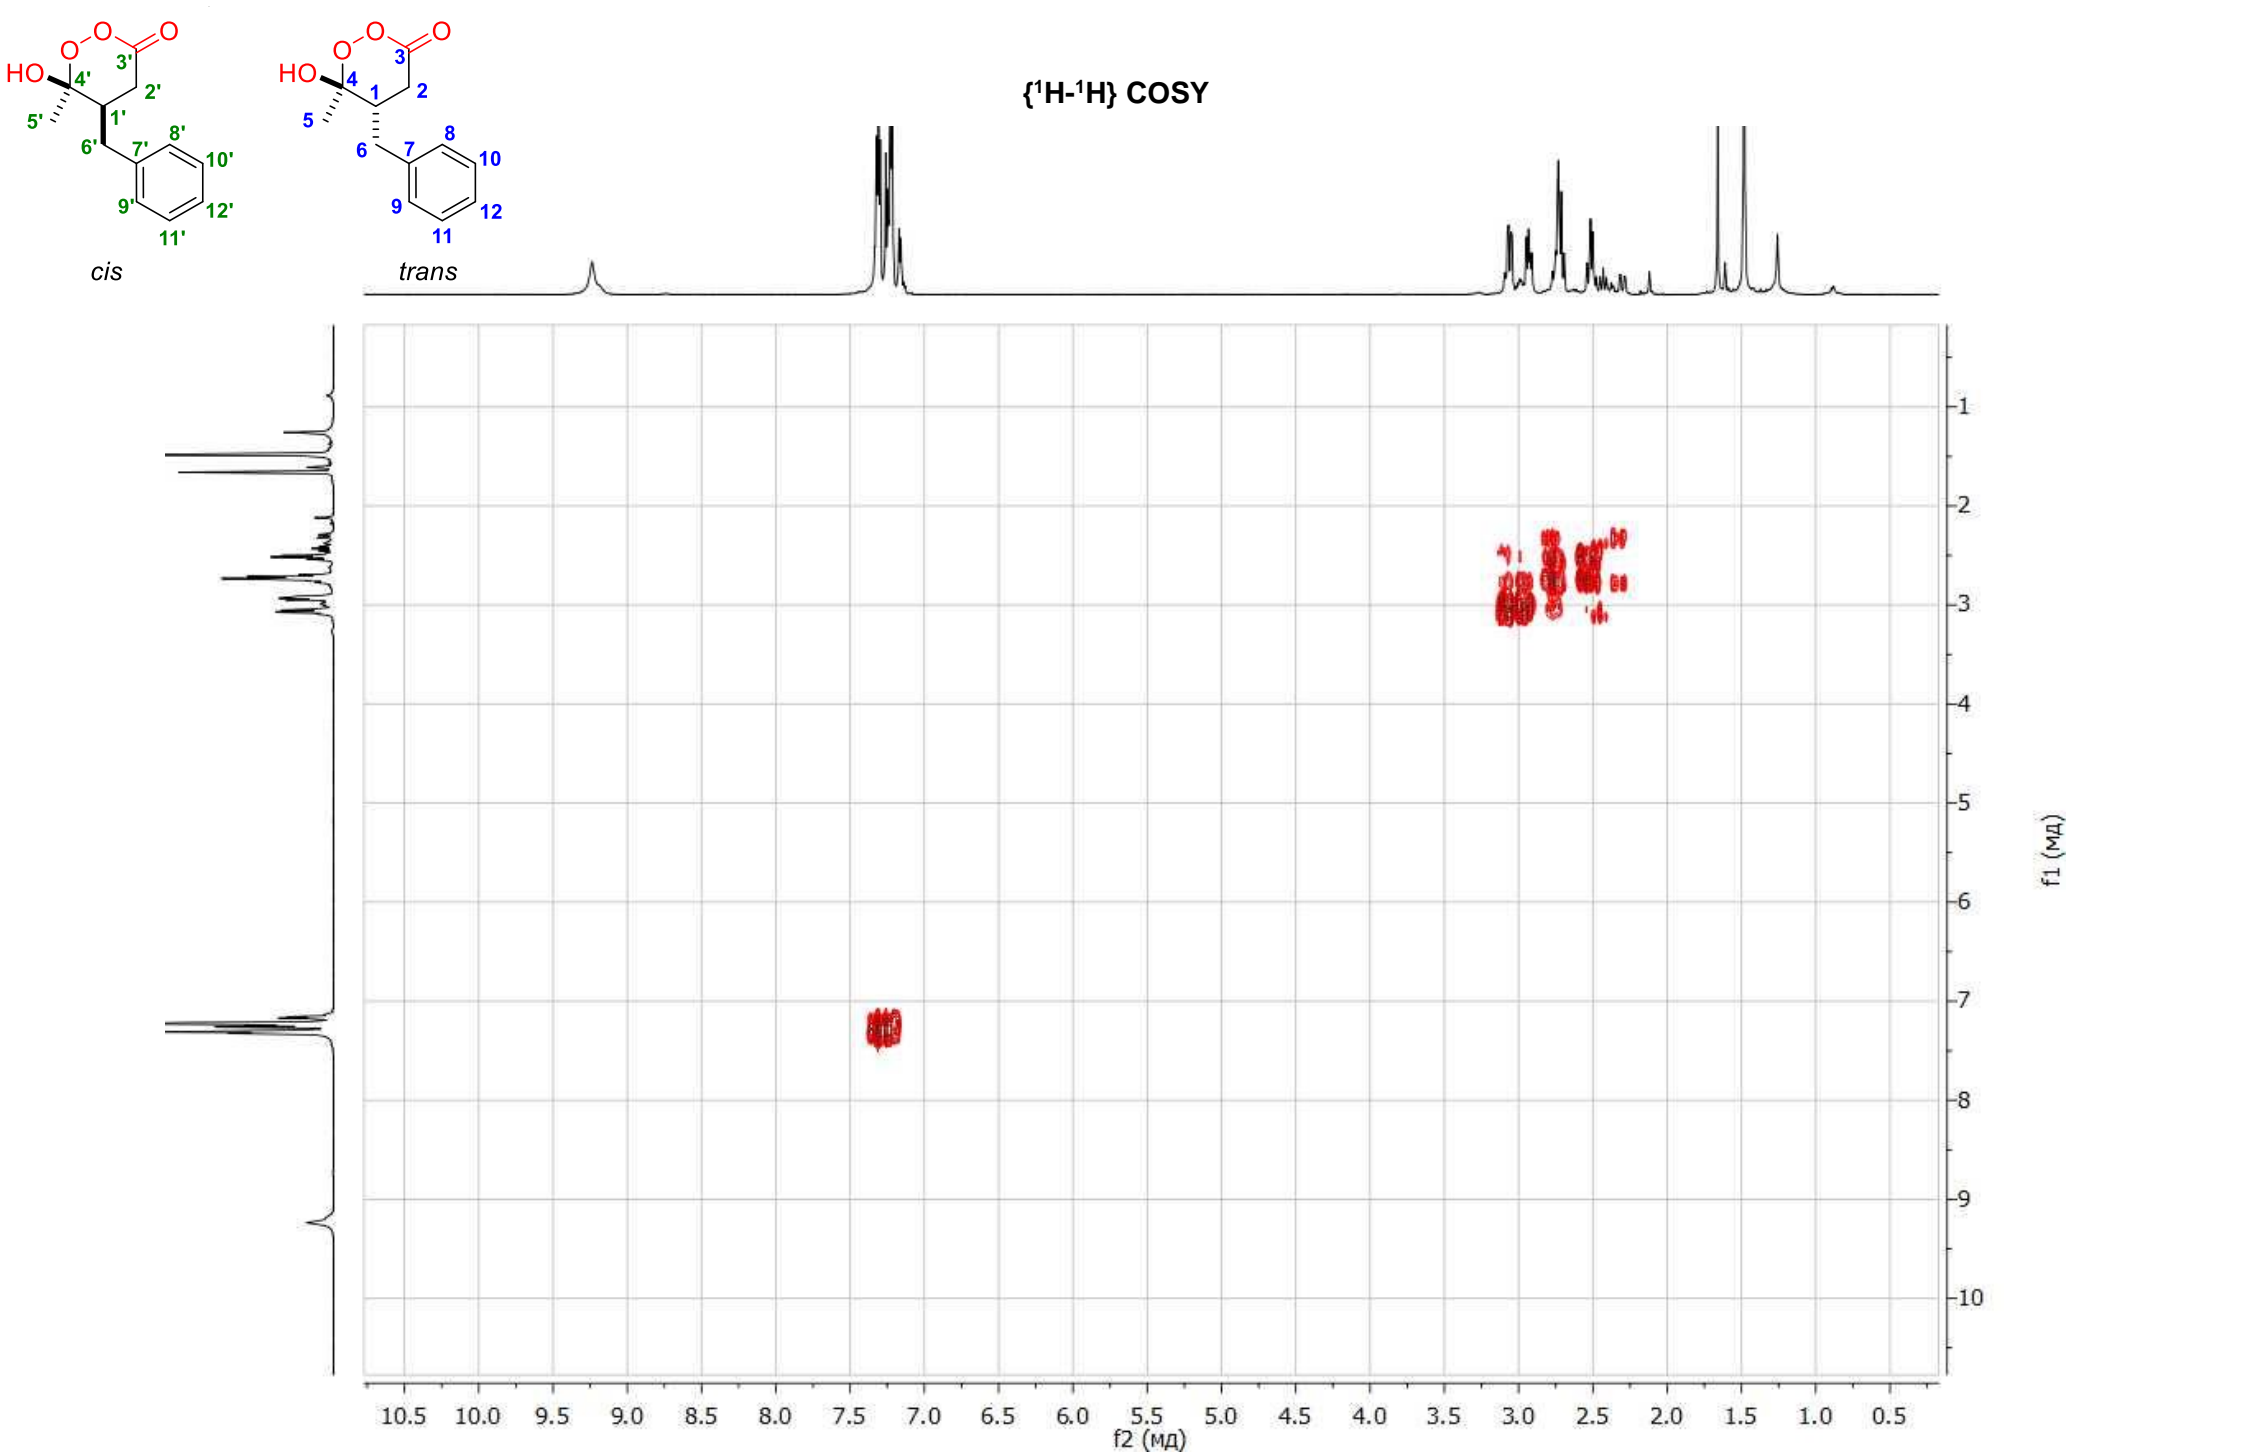

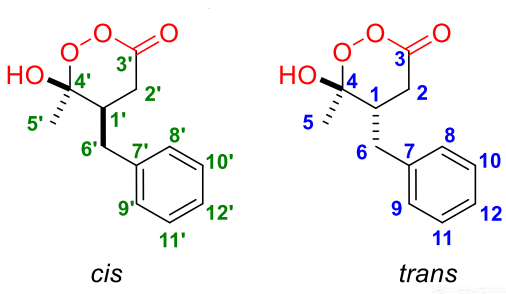

{<sup>1</sup>H-<sup>1</sup>H} NOESY

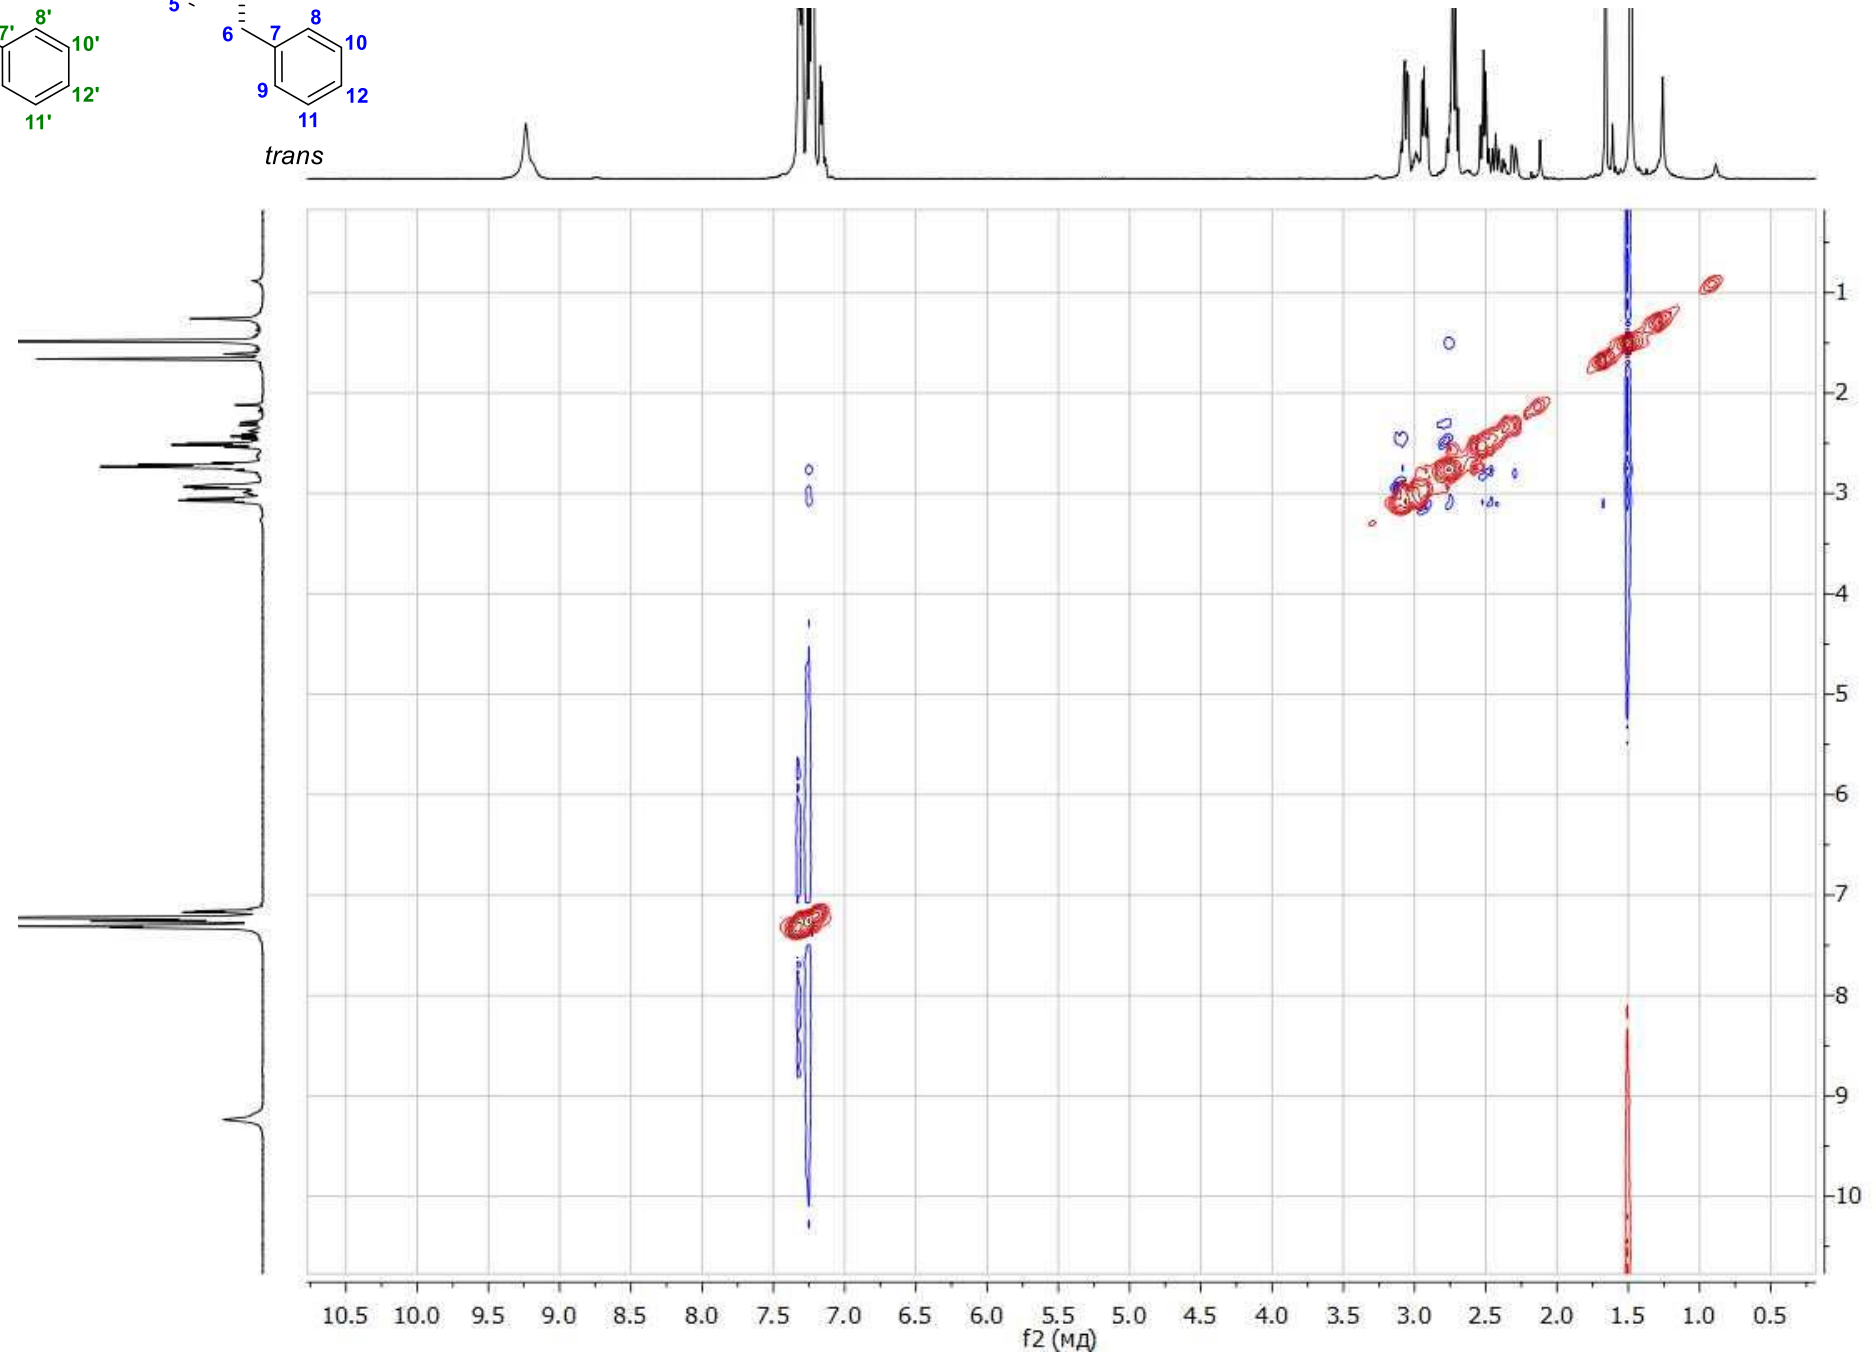

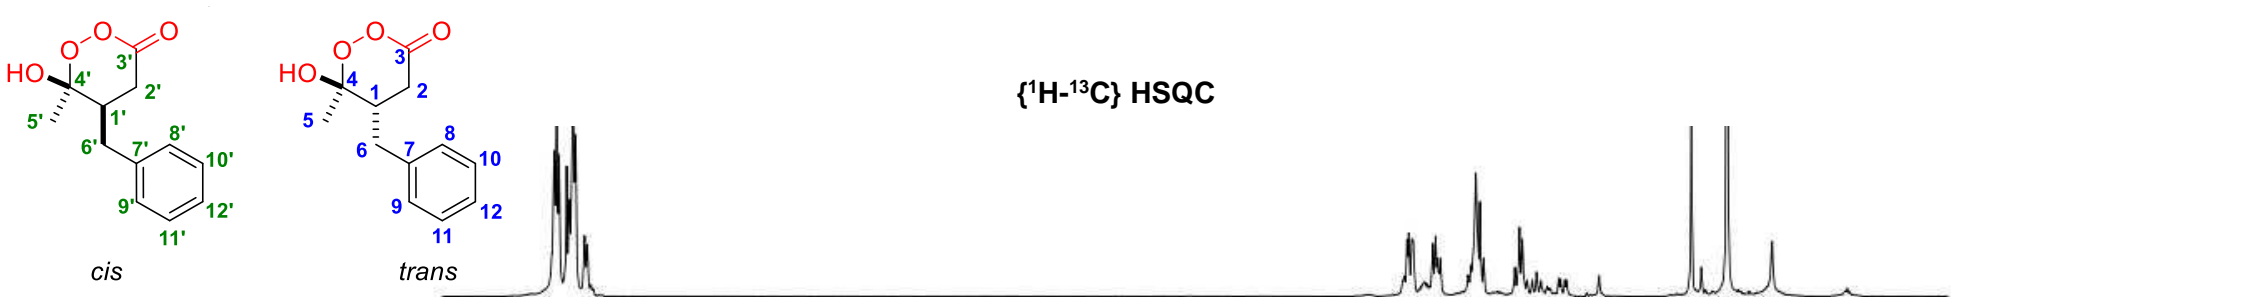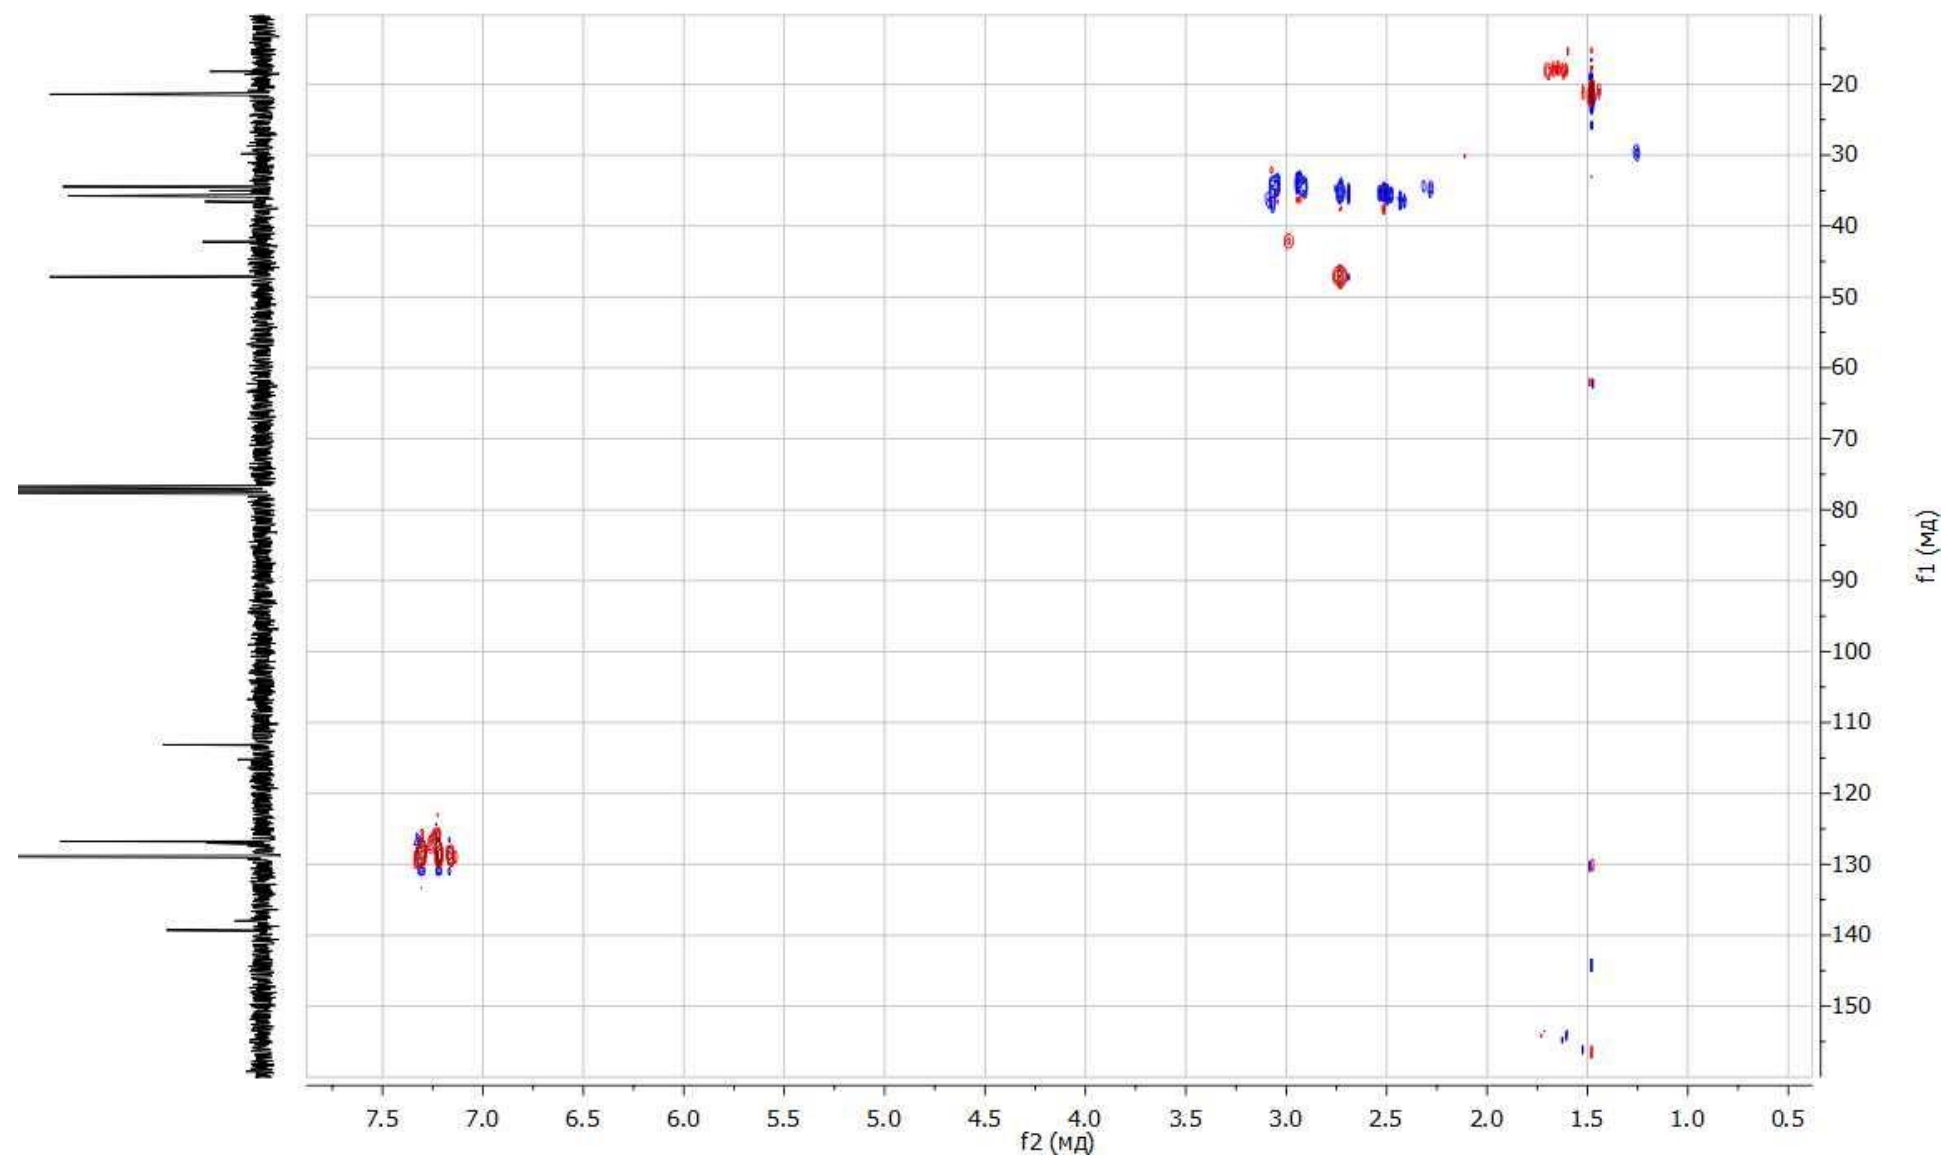

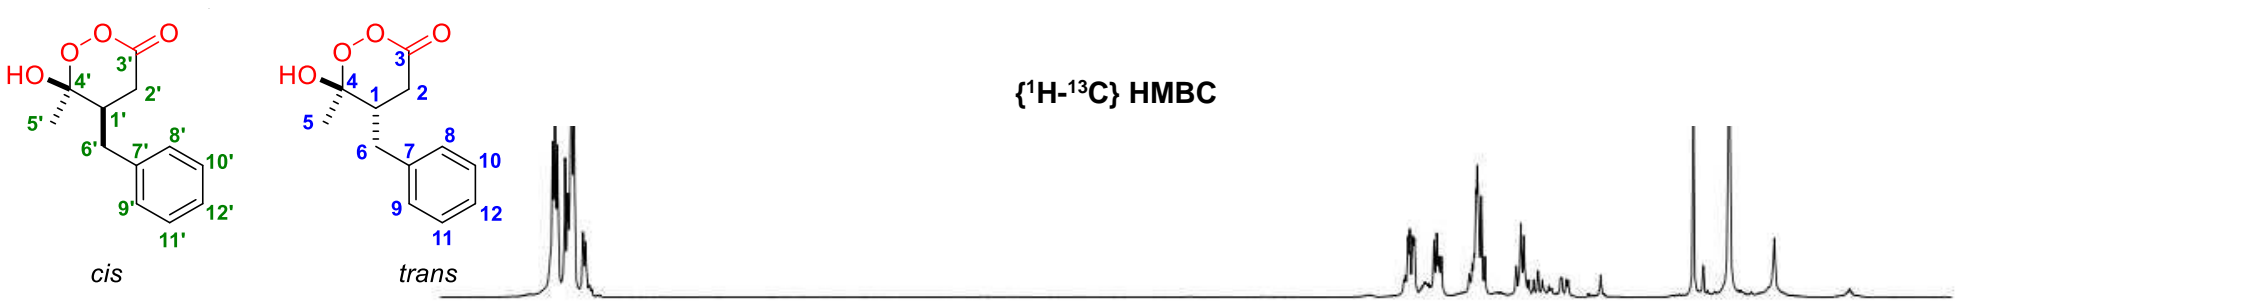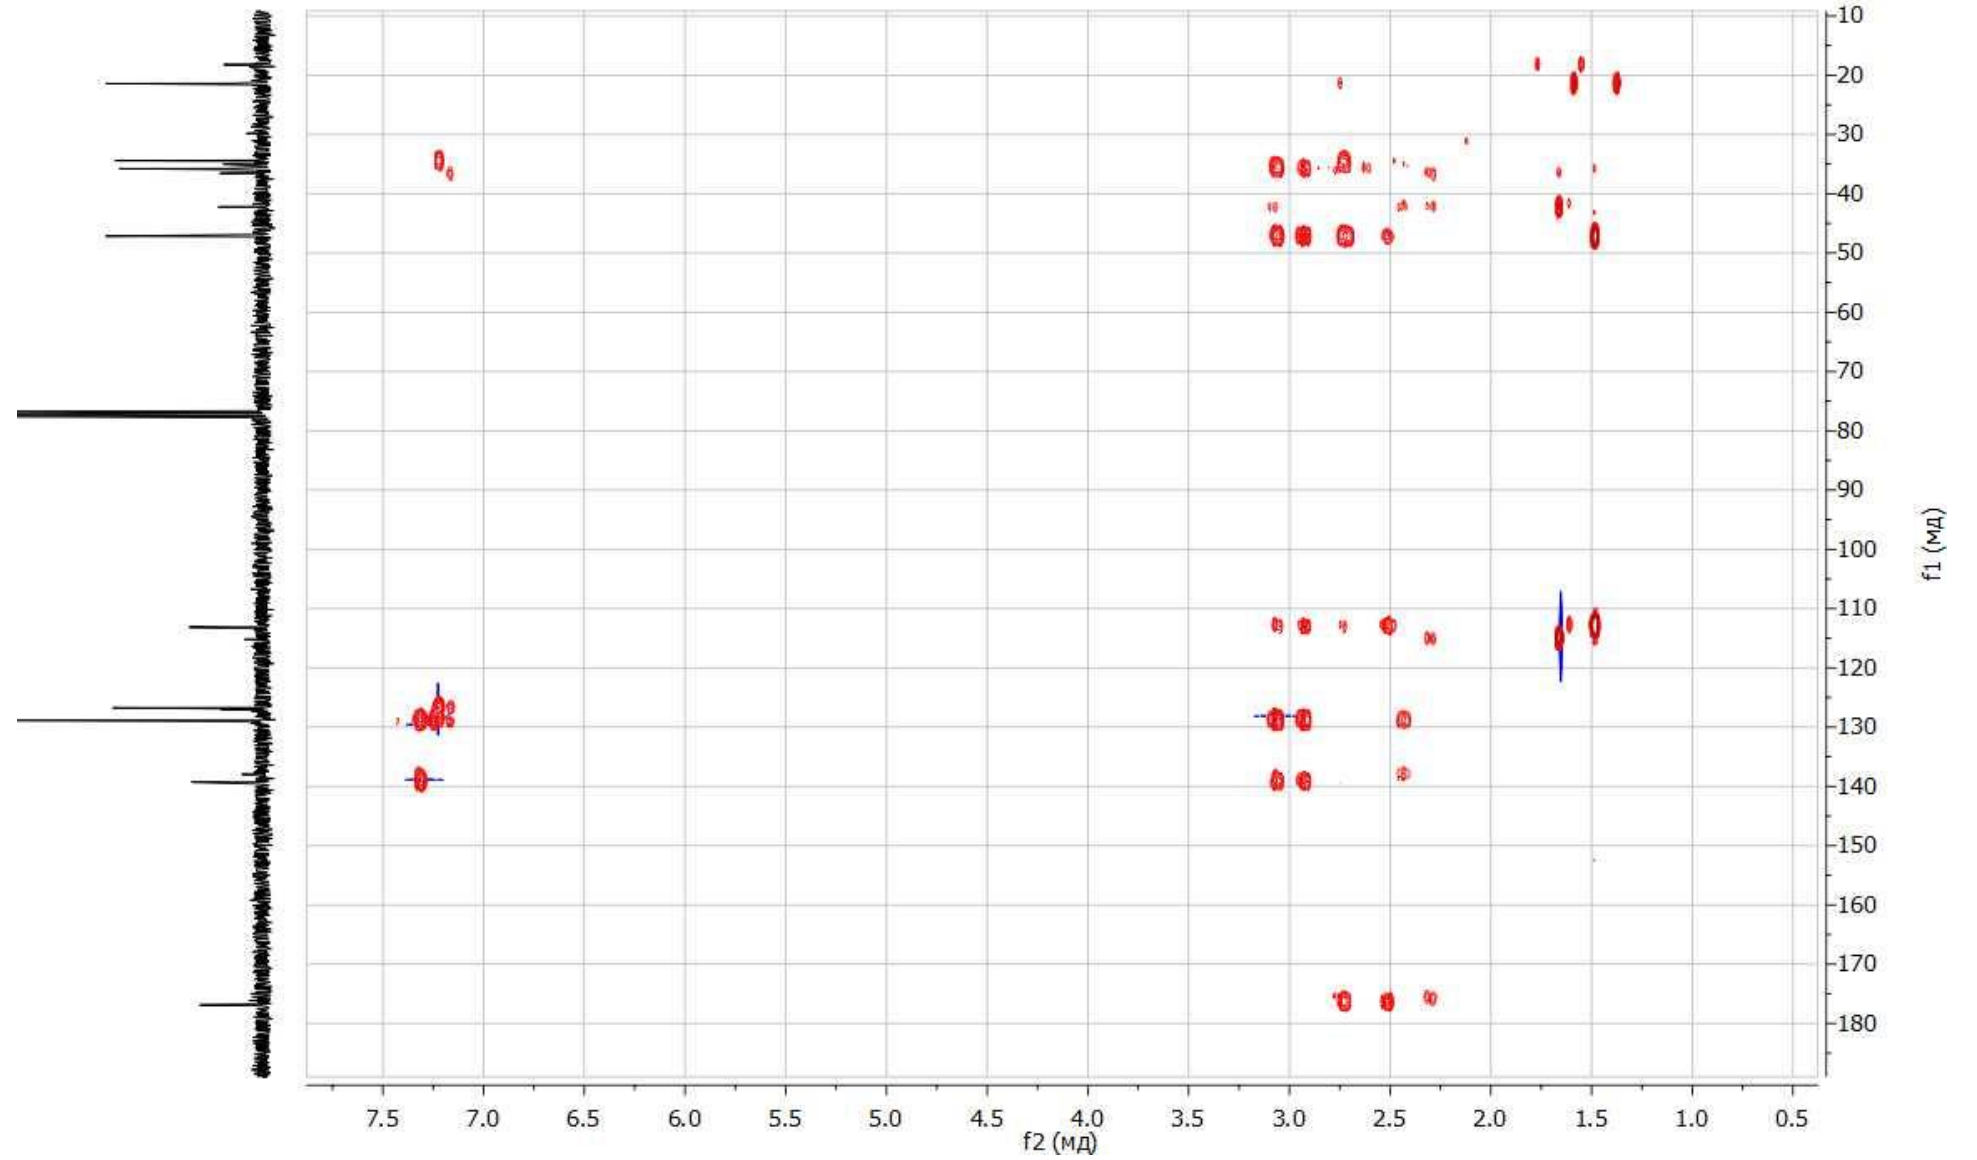

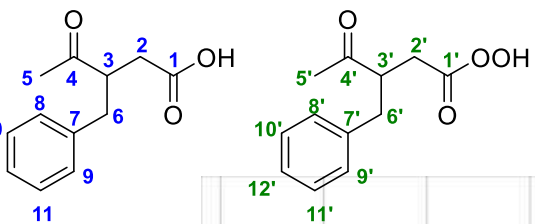

### 3-Benzyl-4-oxopentanoic acid (5a) and 3-benzyl-4-oxopentanoic acid peroxide (4a)

#### <sup>1</sup>H NMR

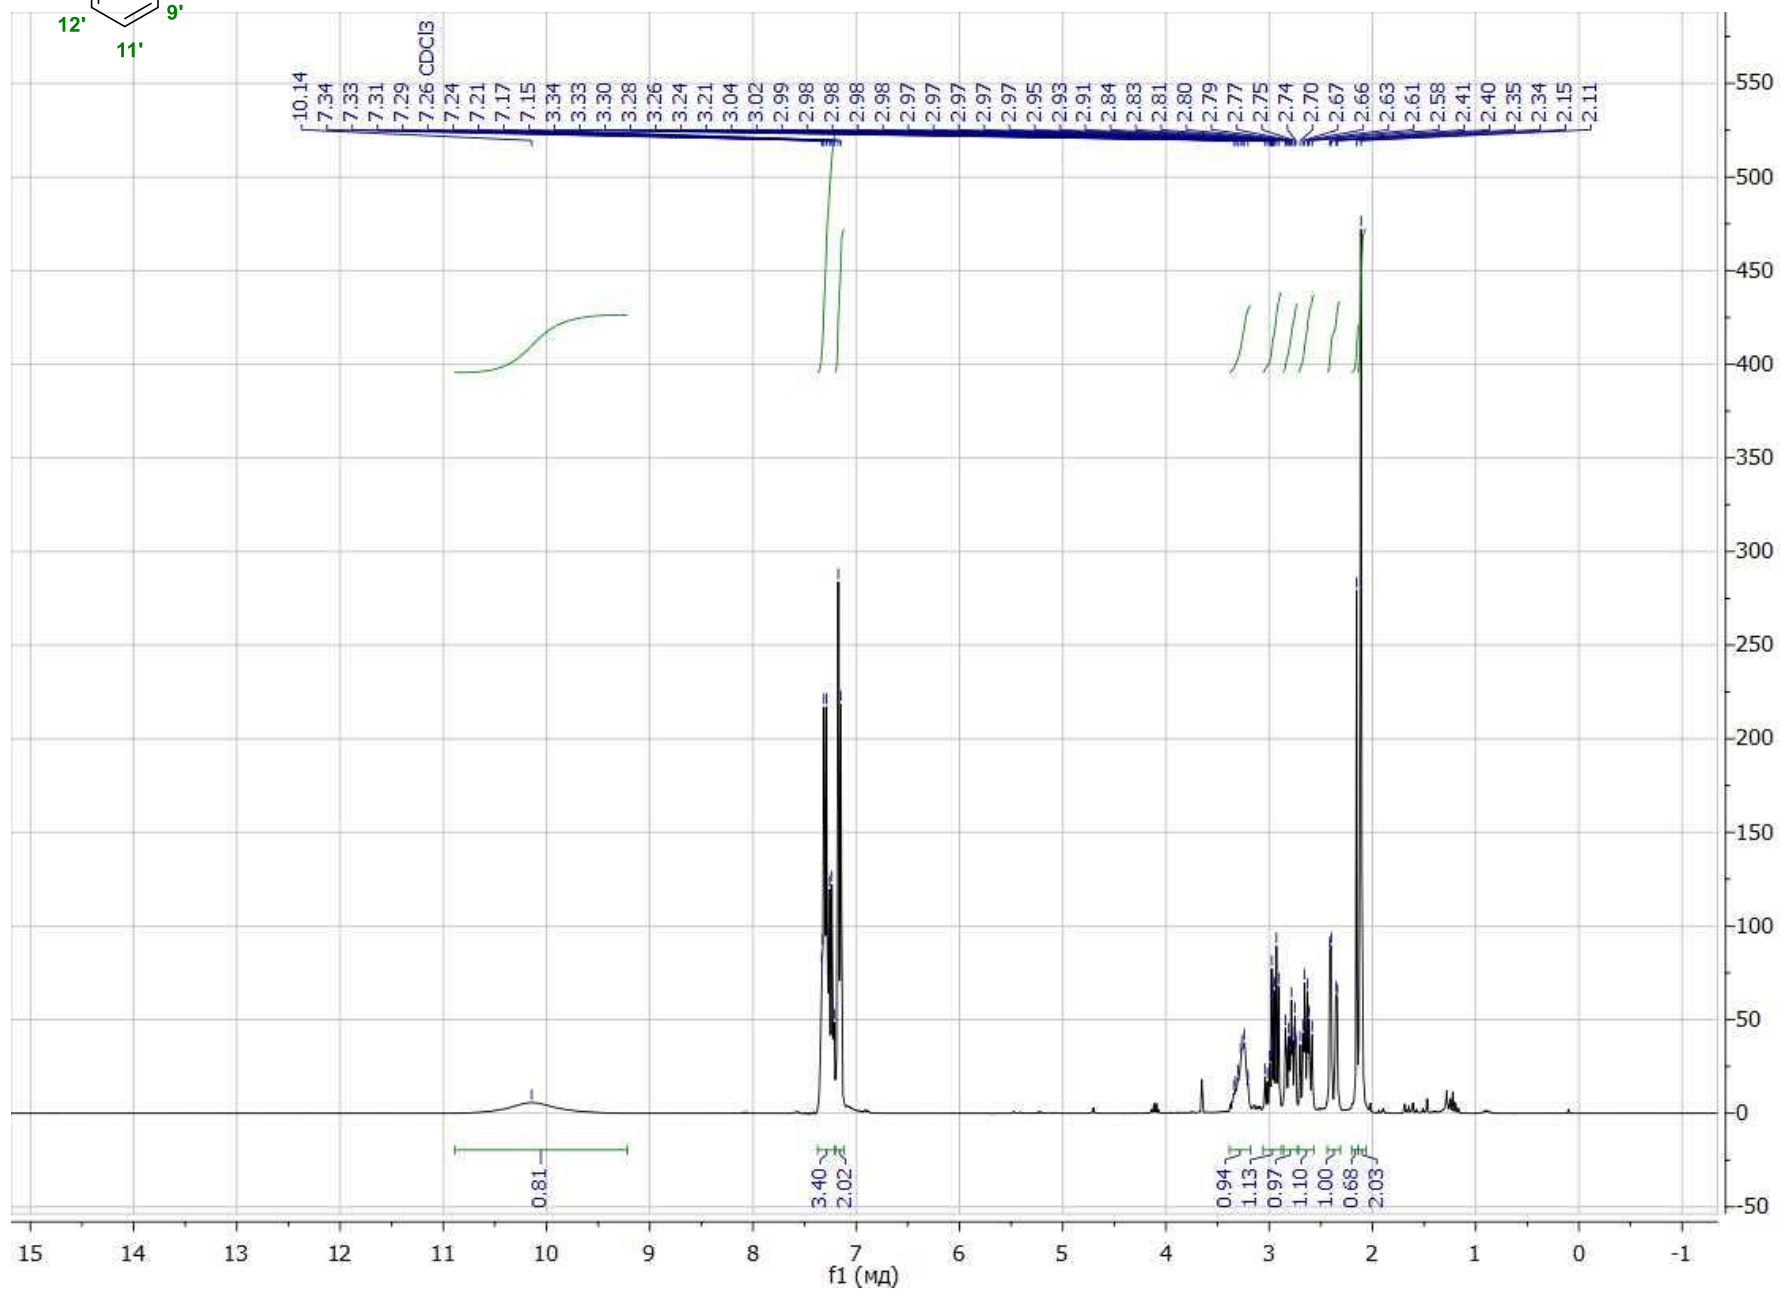

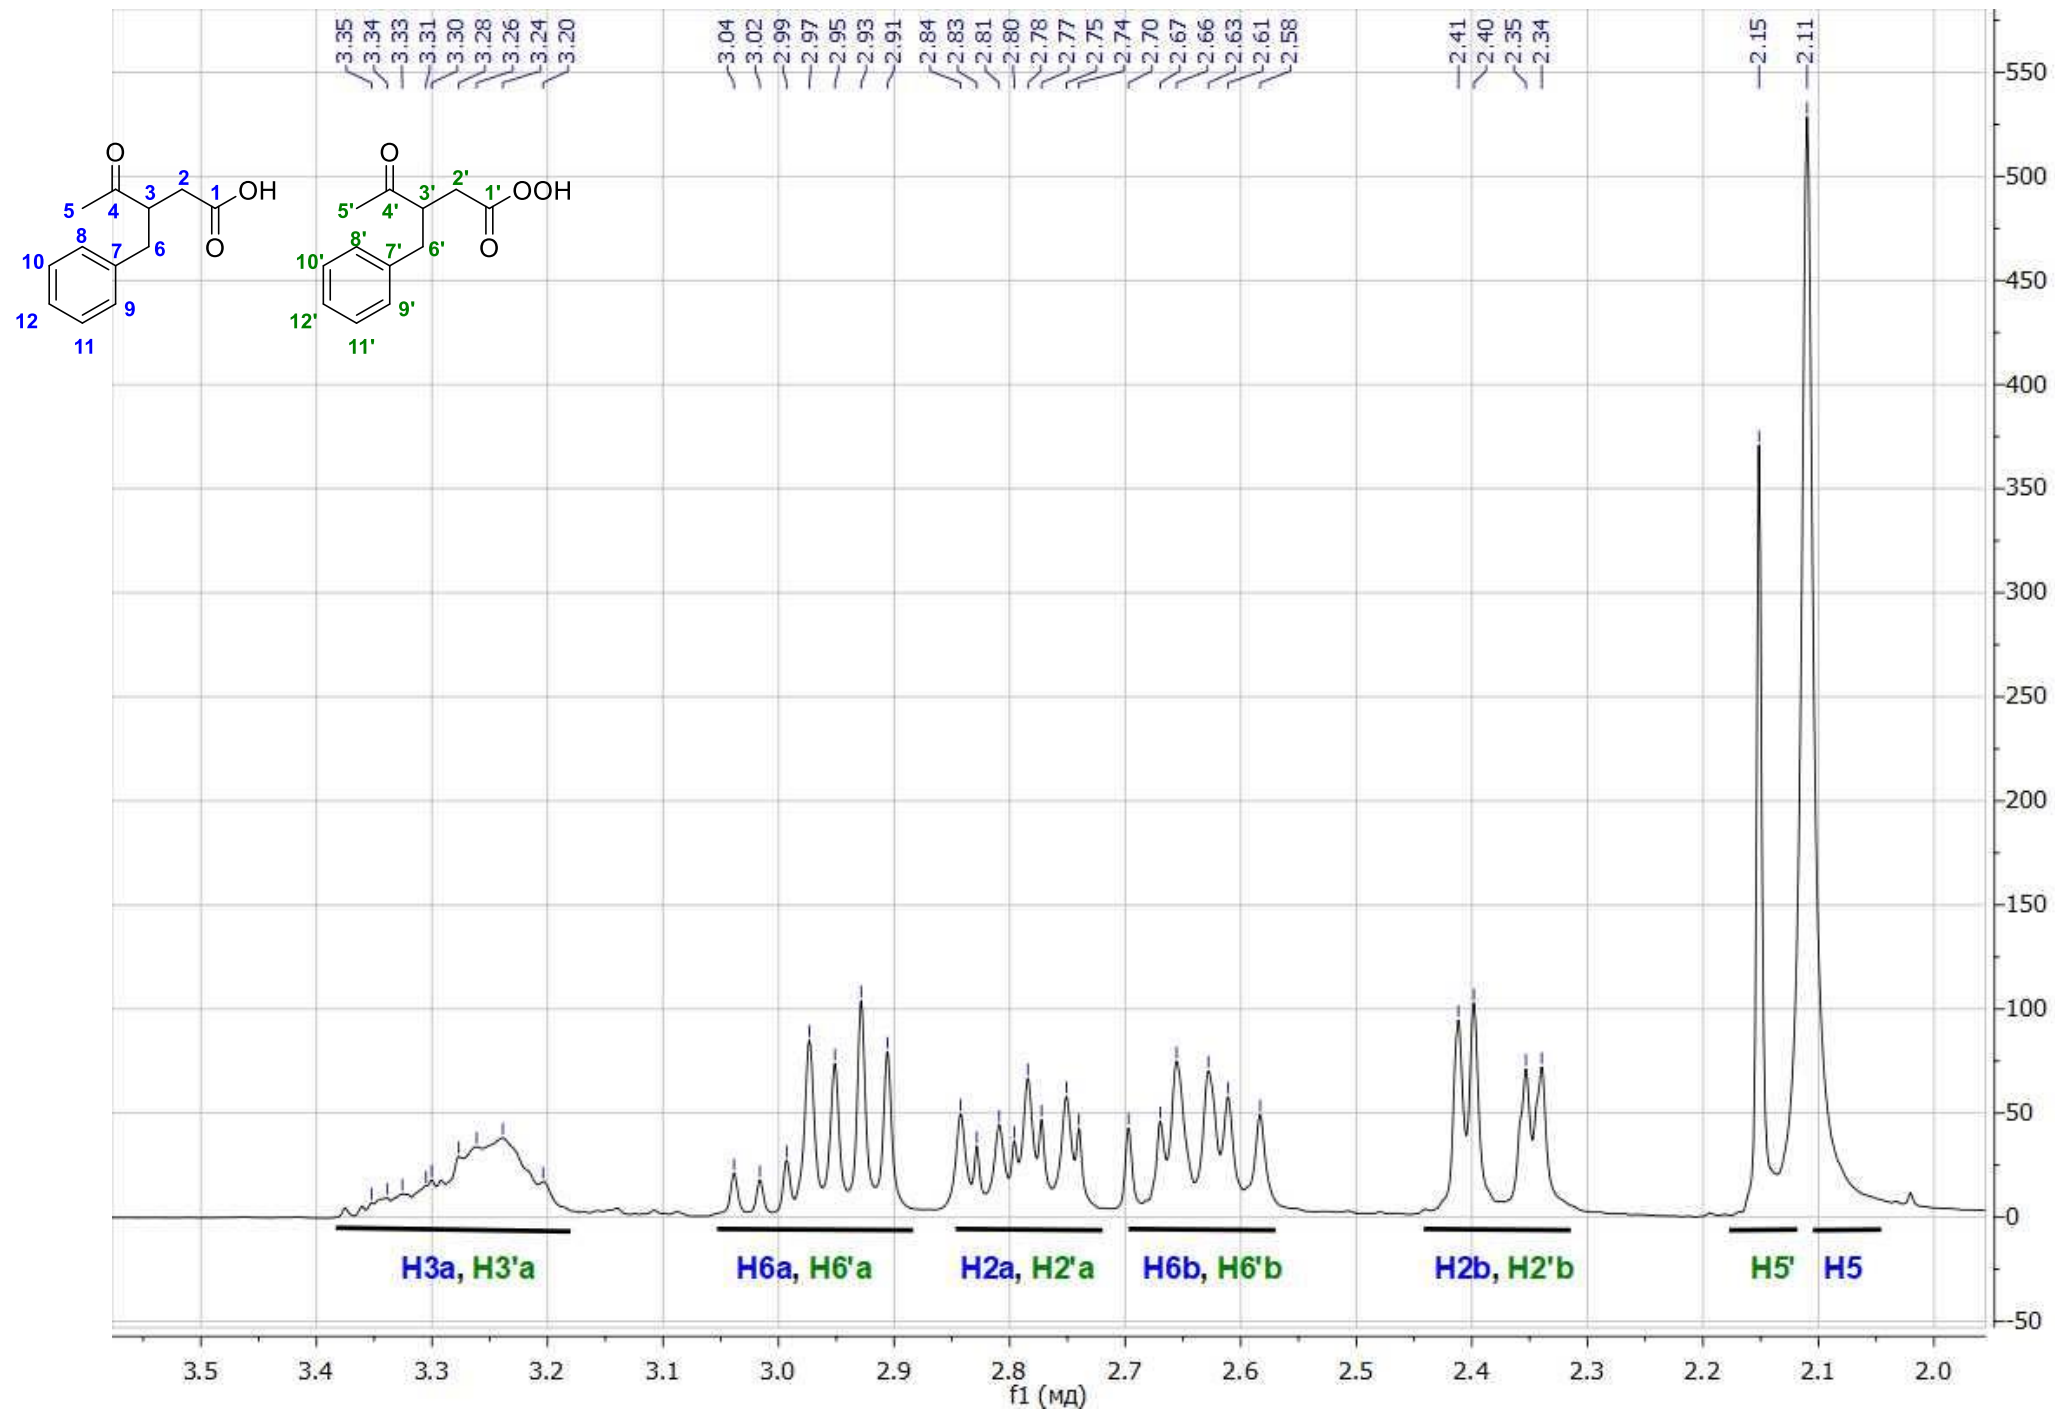

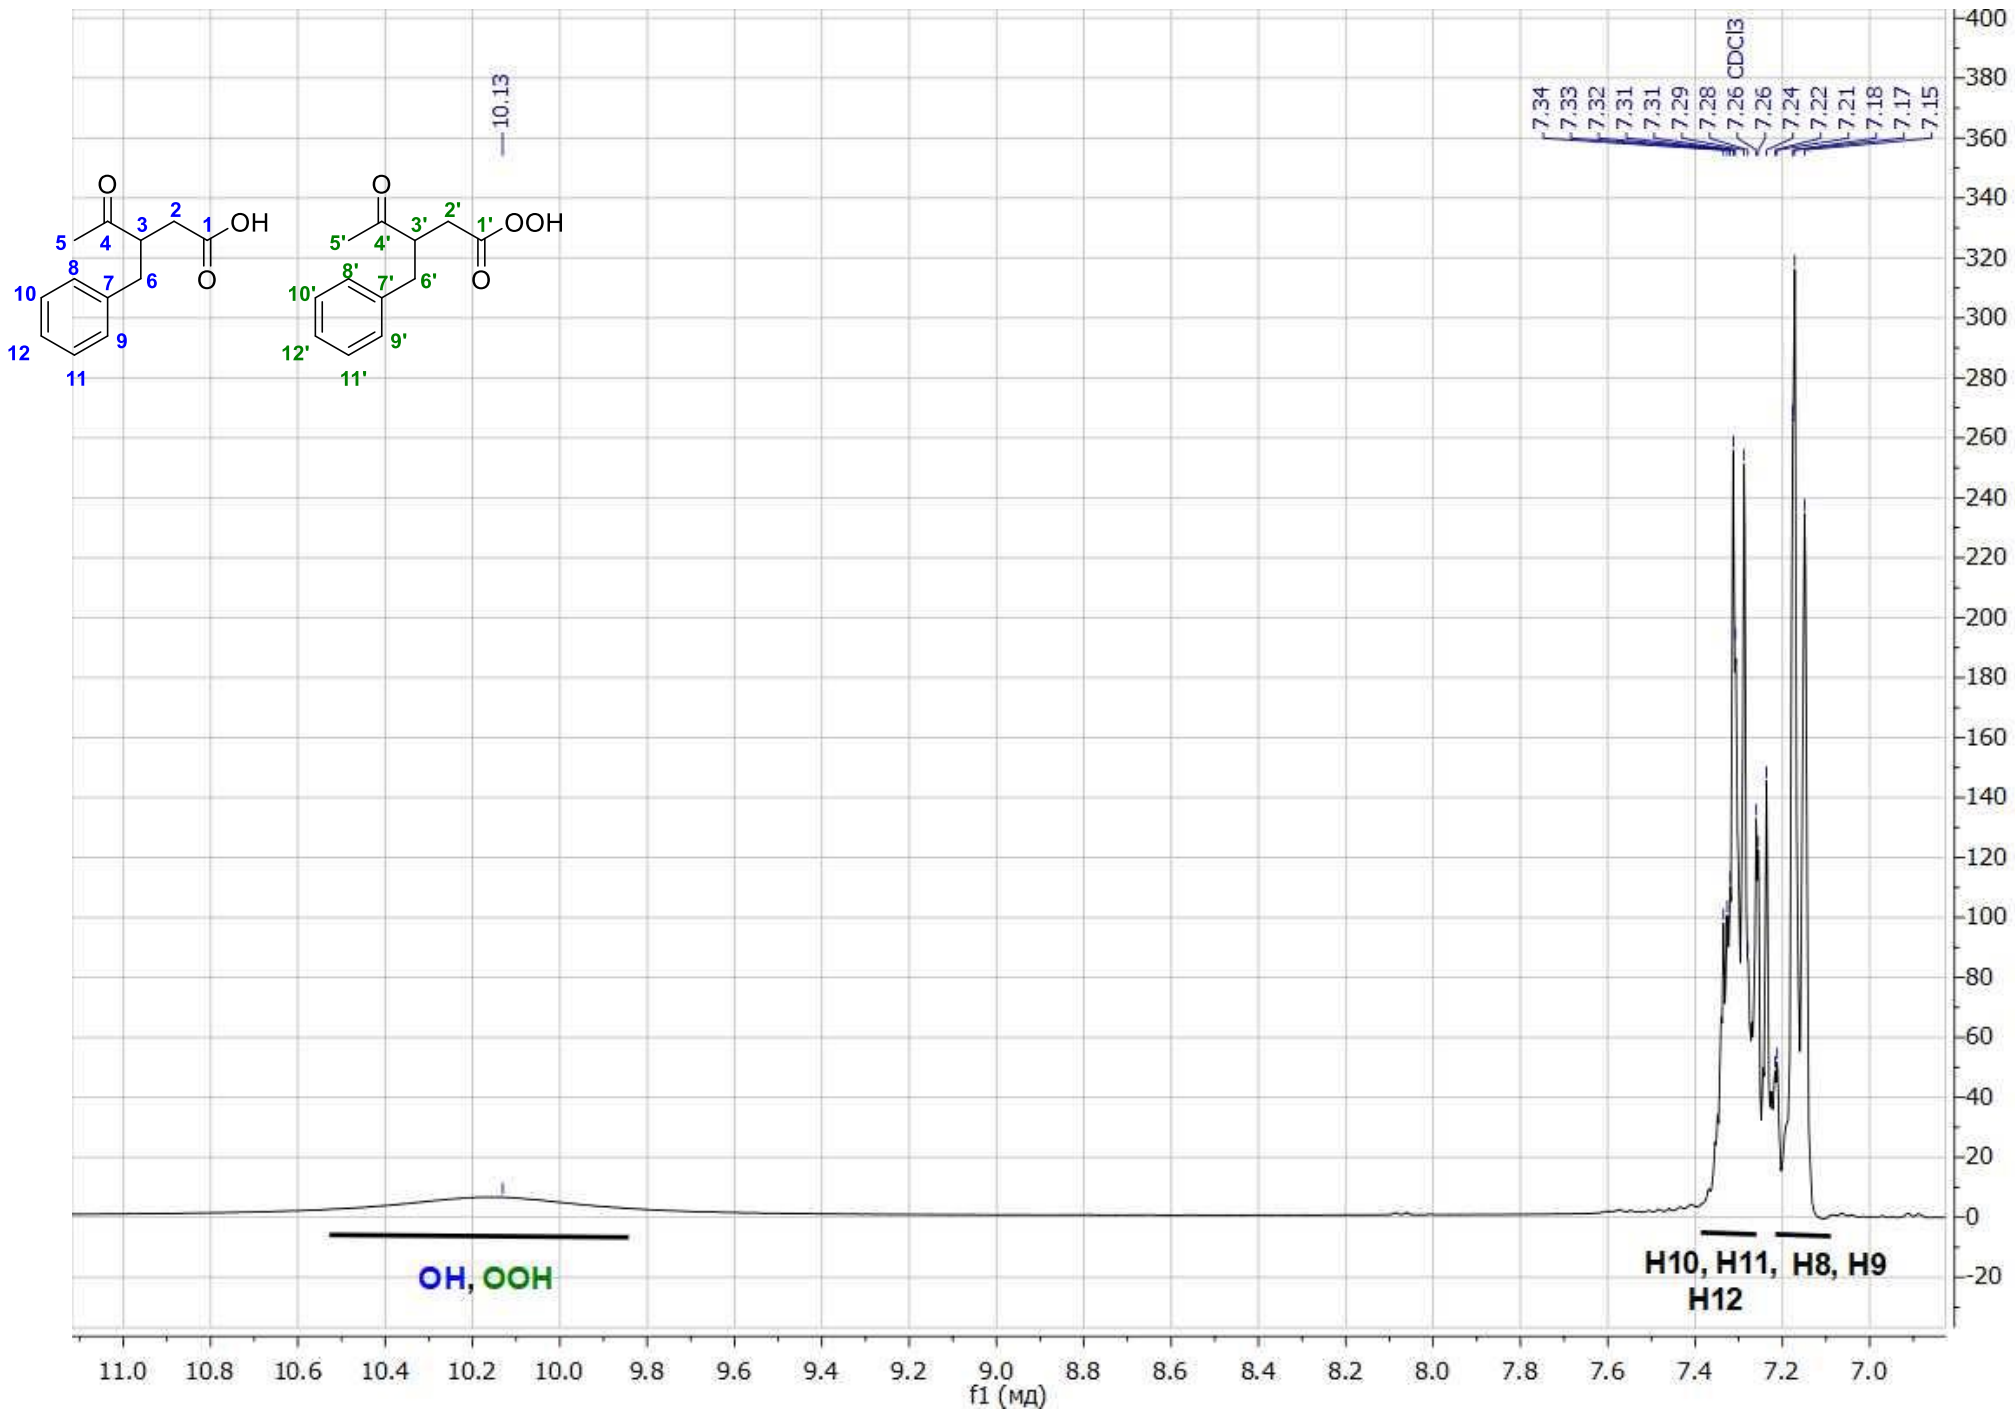

# <sup>13</sup>C NMR

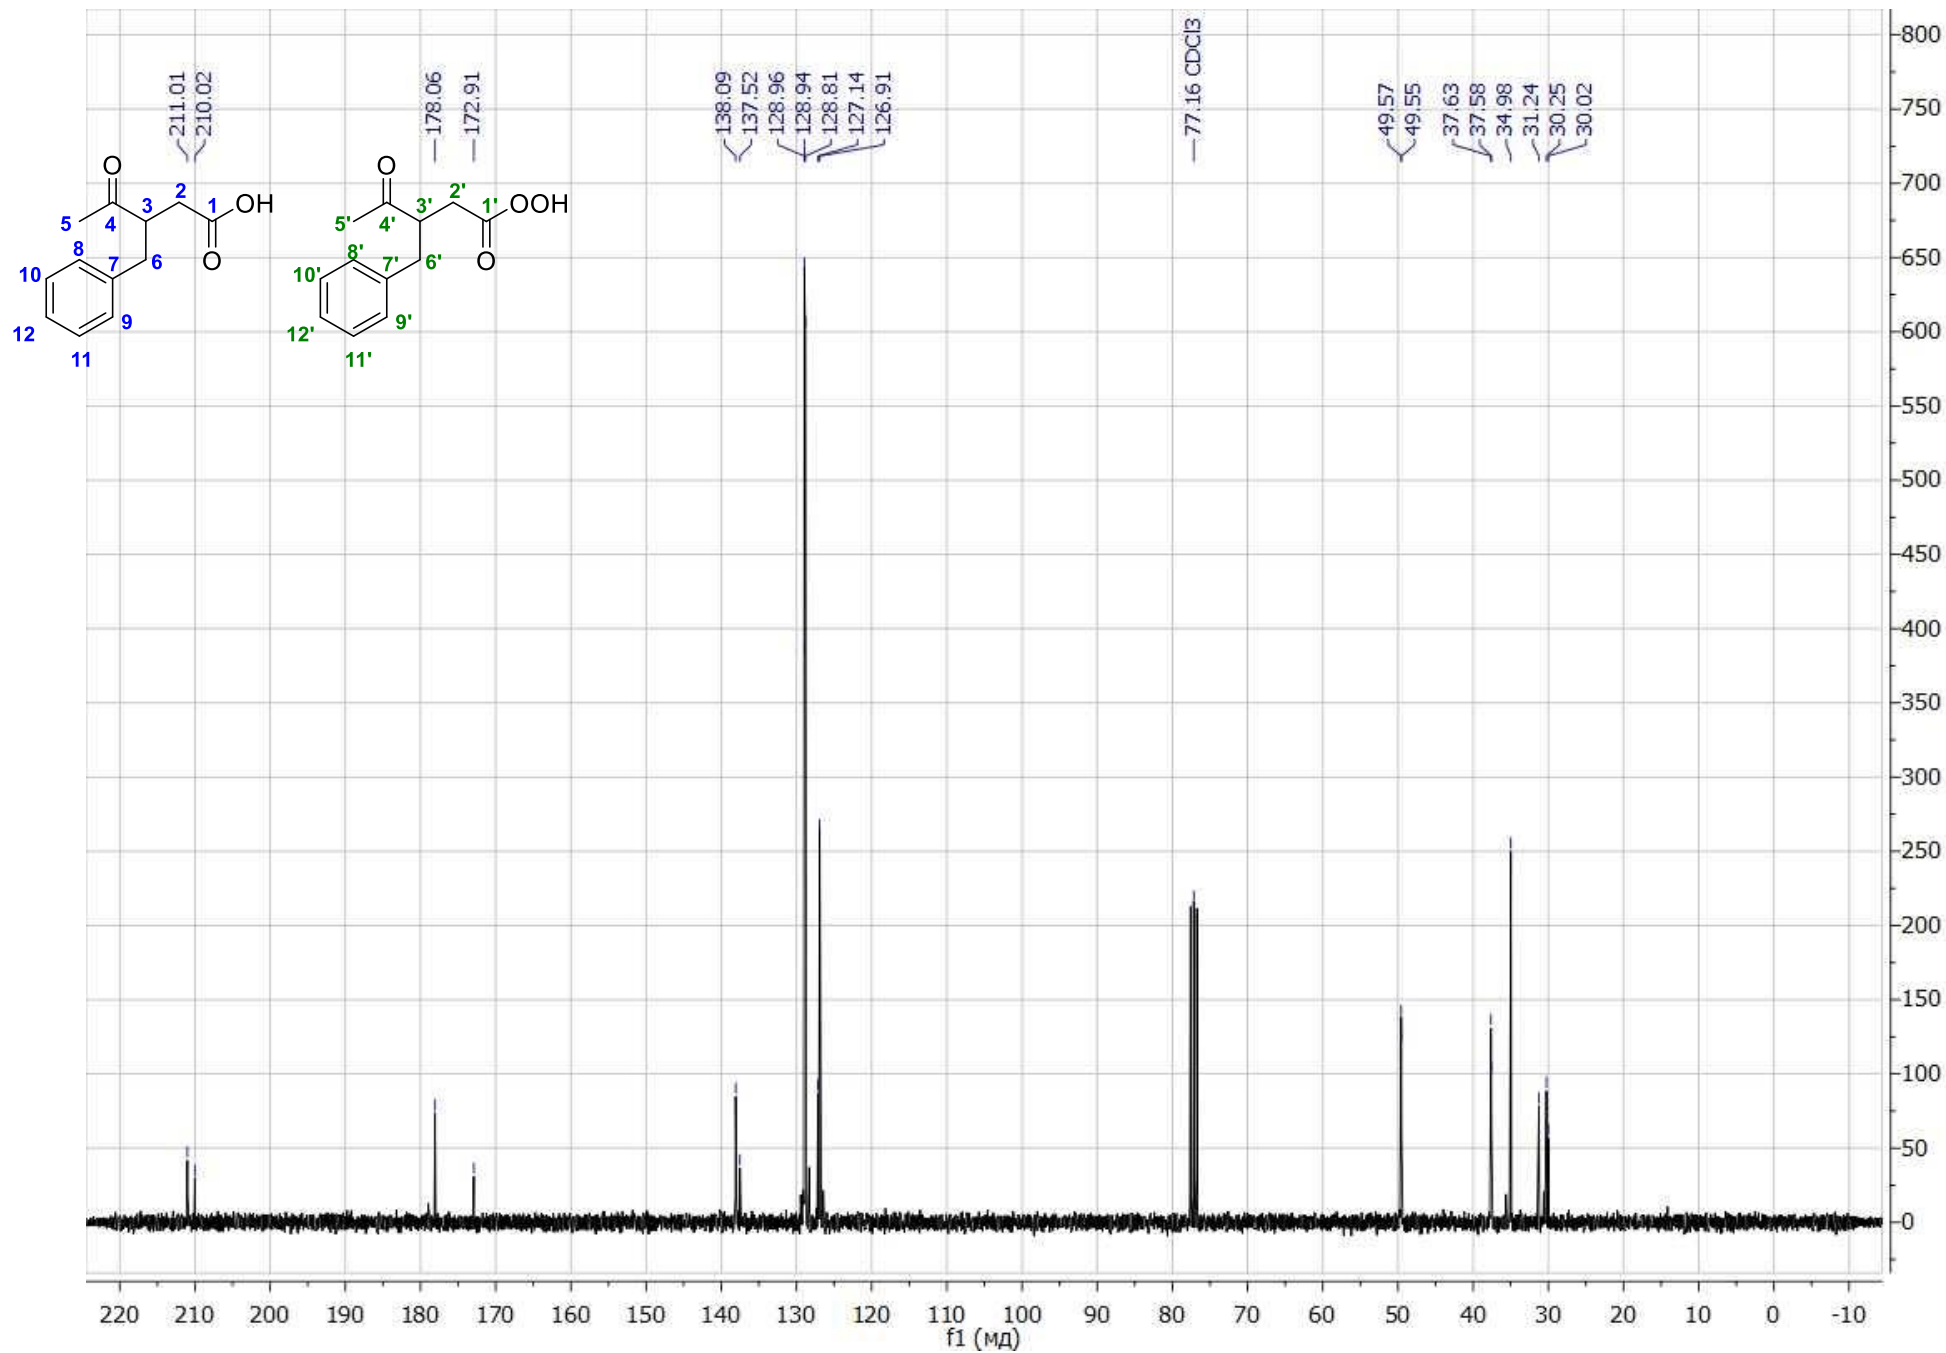



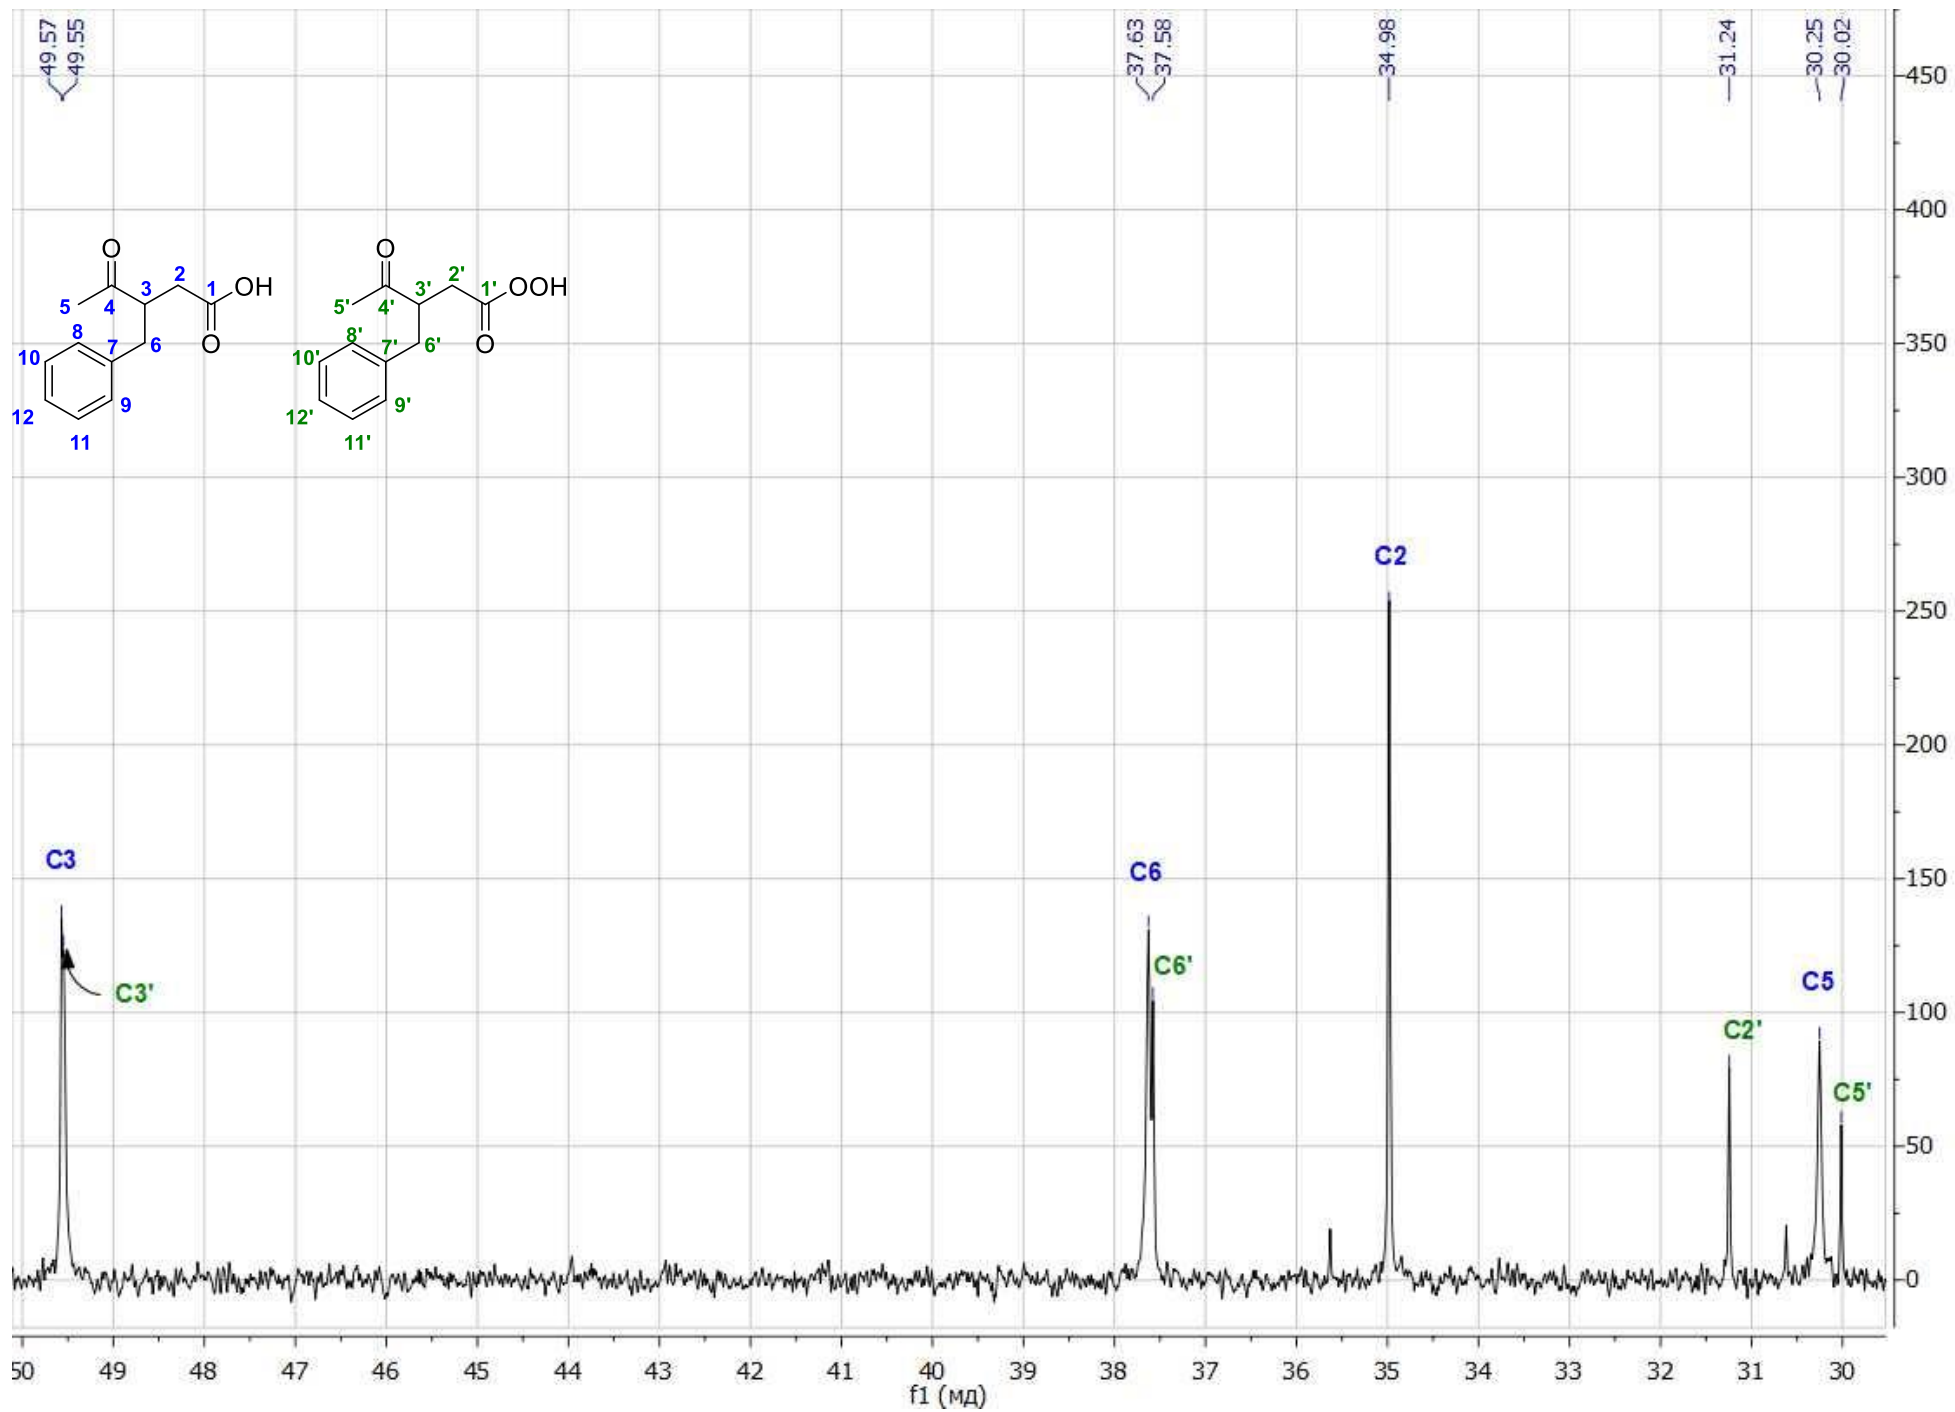

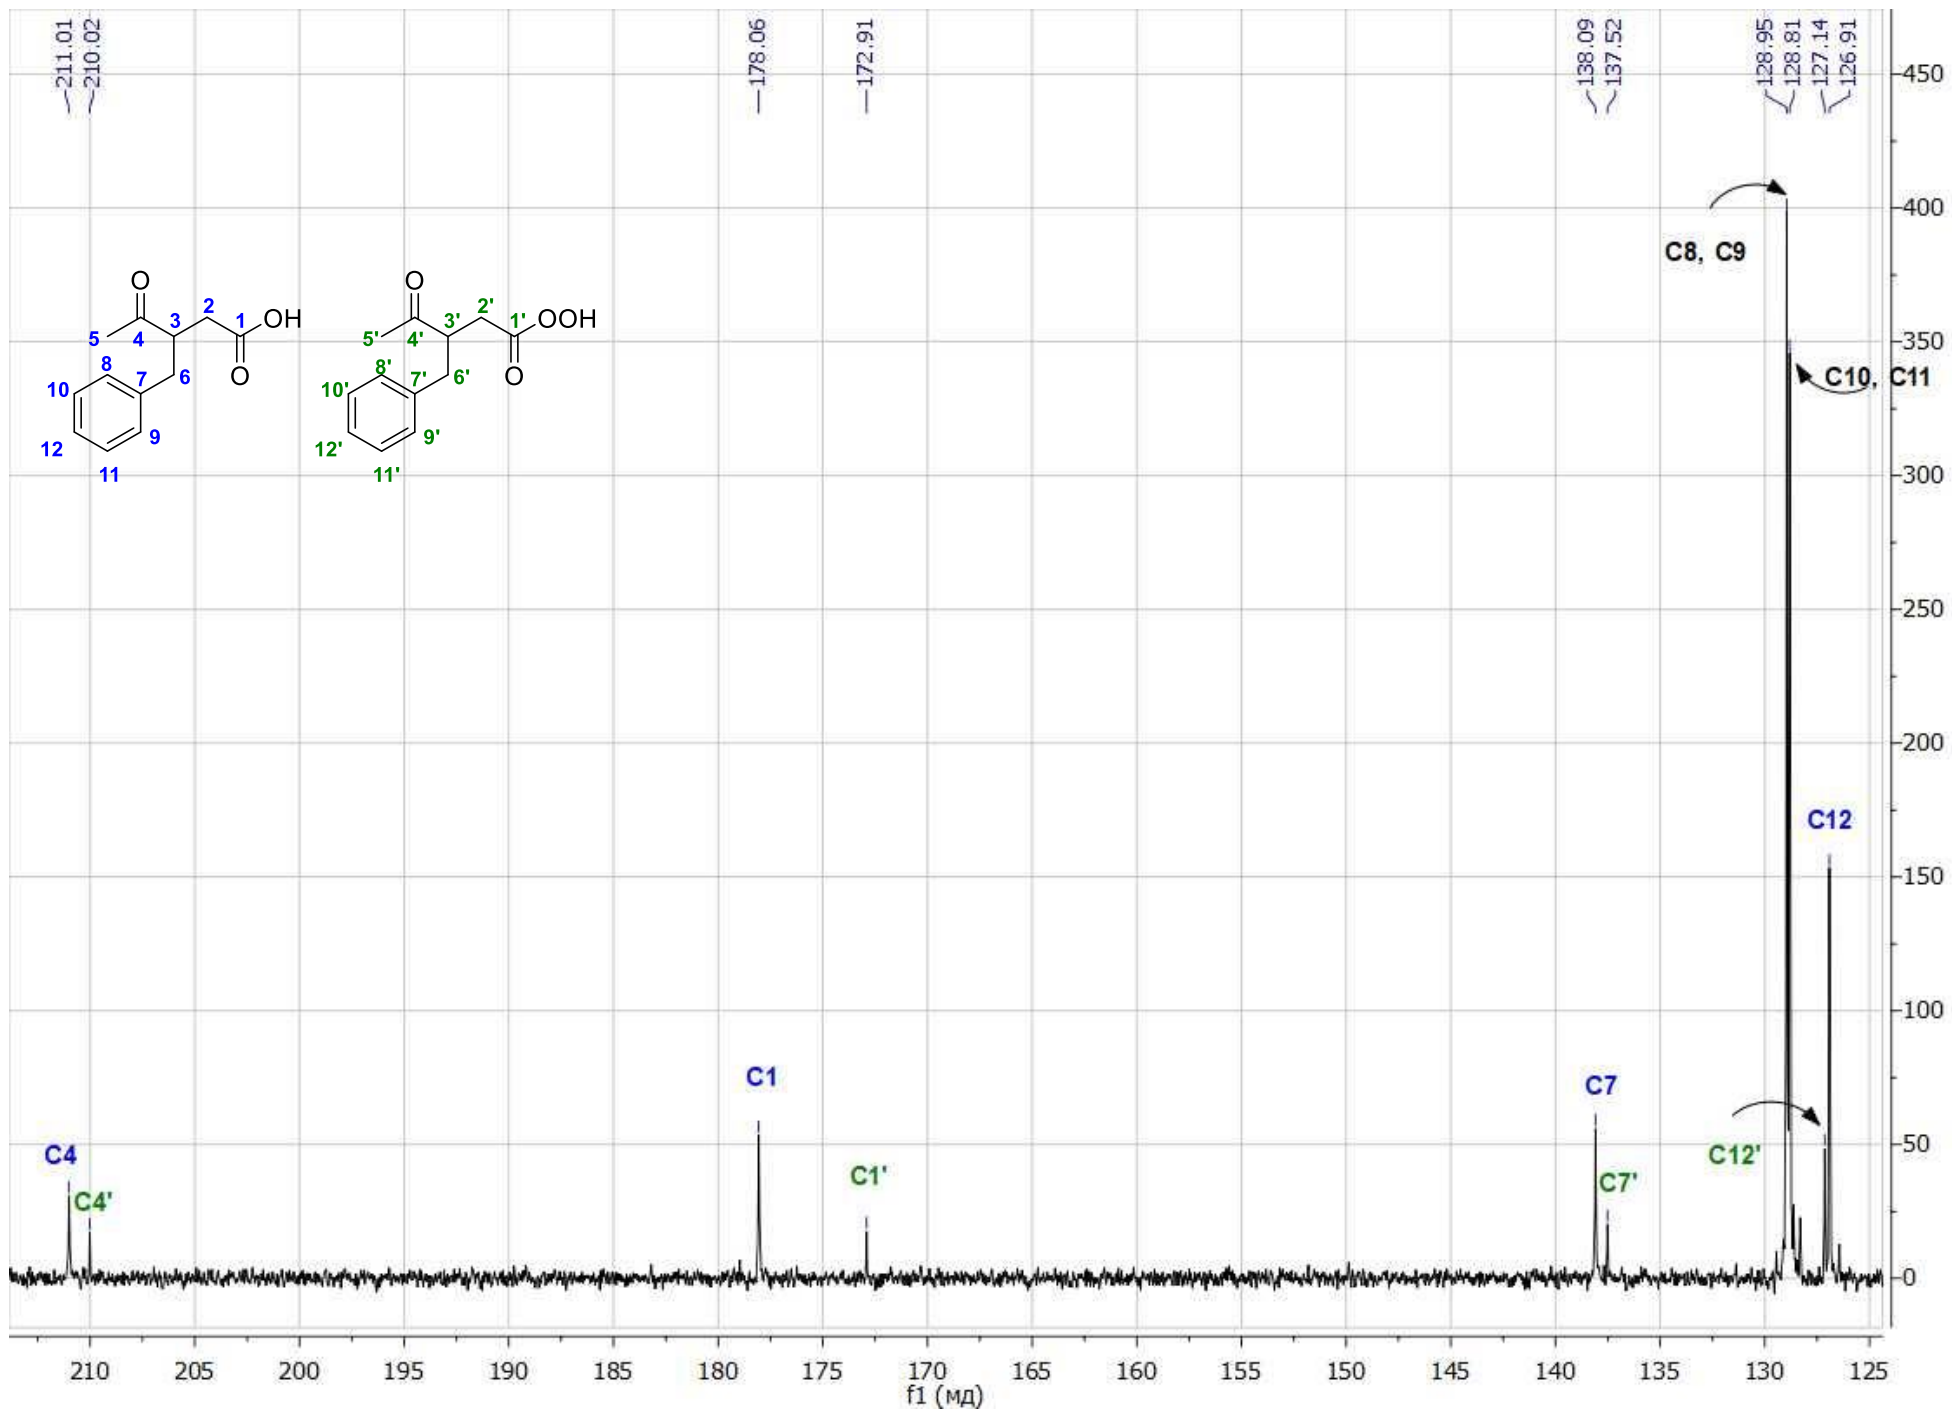

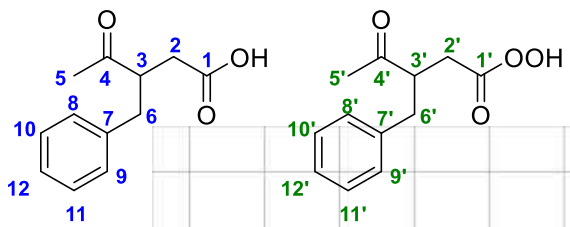

<sup>13</sup>C\_deptsp135

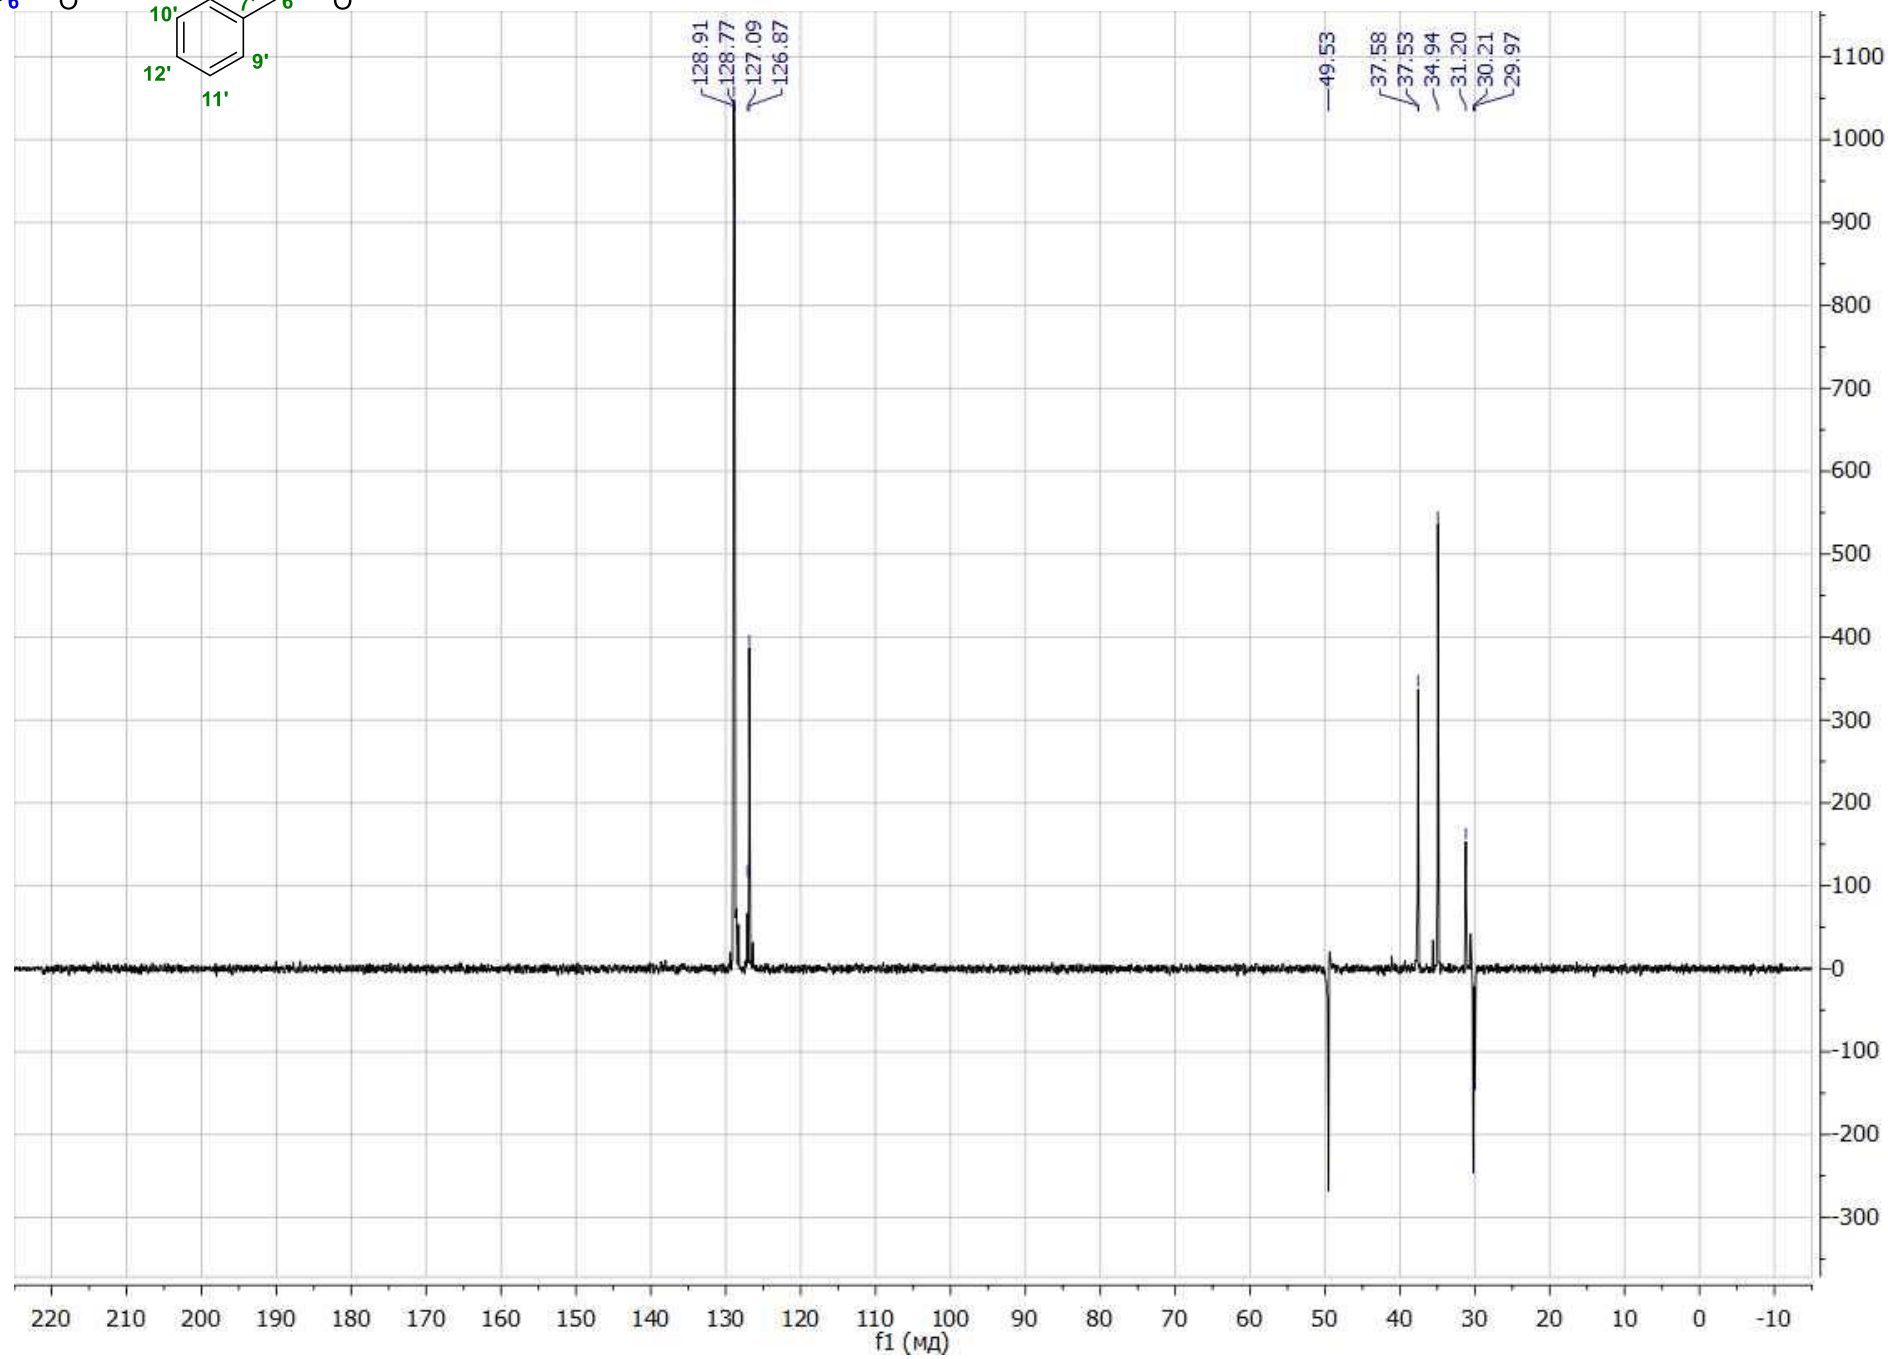

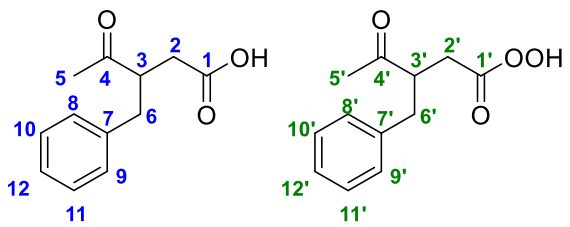

{<sup>1</sup>H-<sup>1</sup>H} COSY

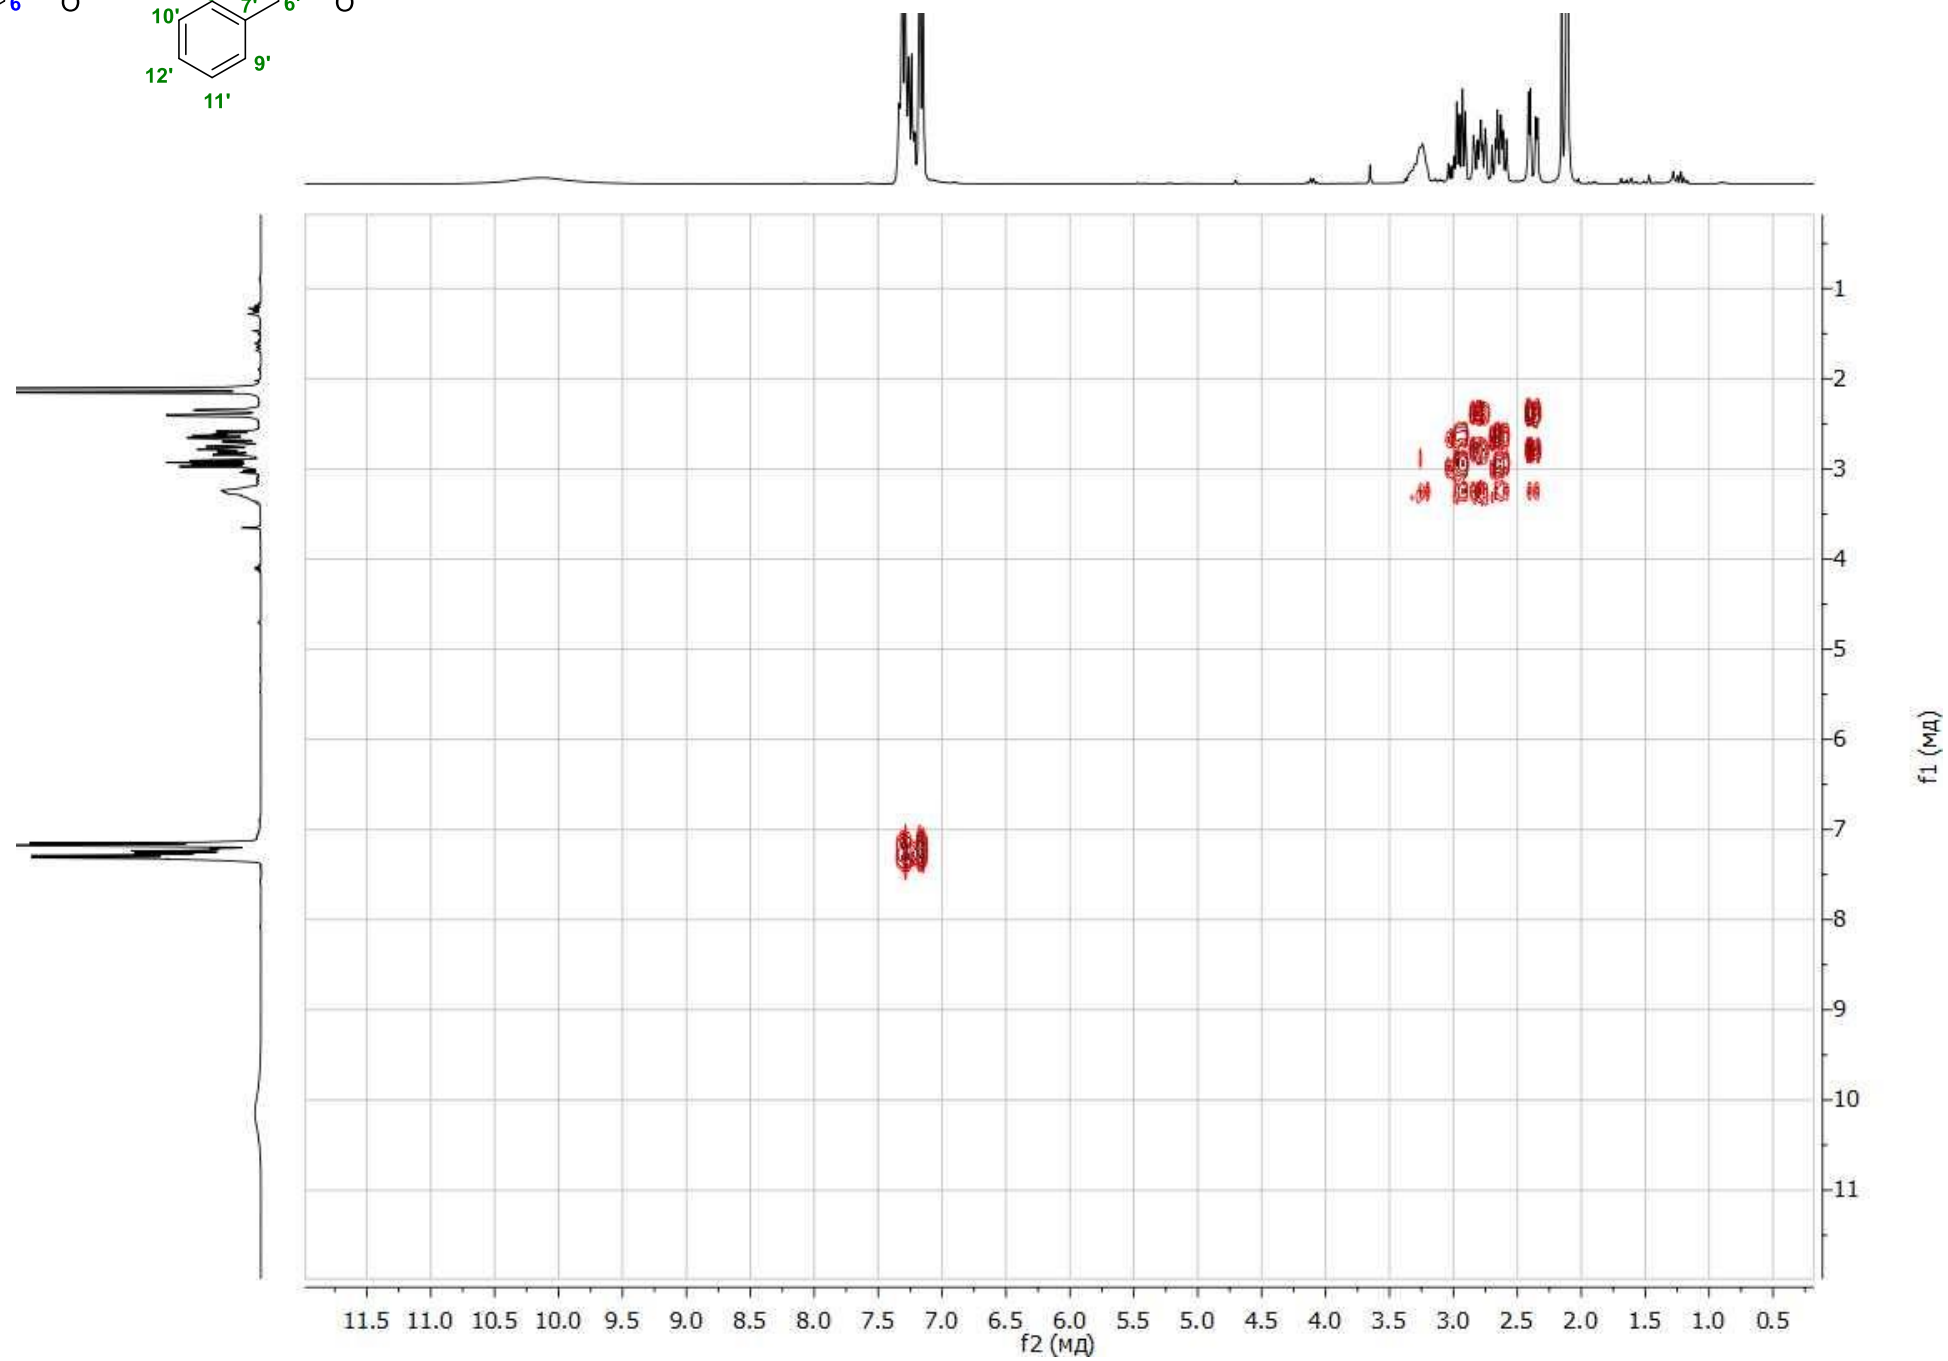



{<sup>1</sup>H-<sup>13</sup>C} HSQC

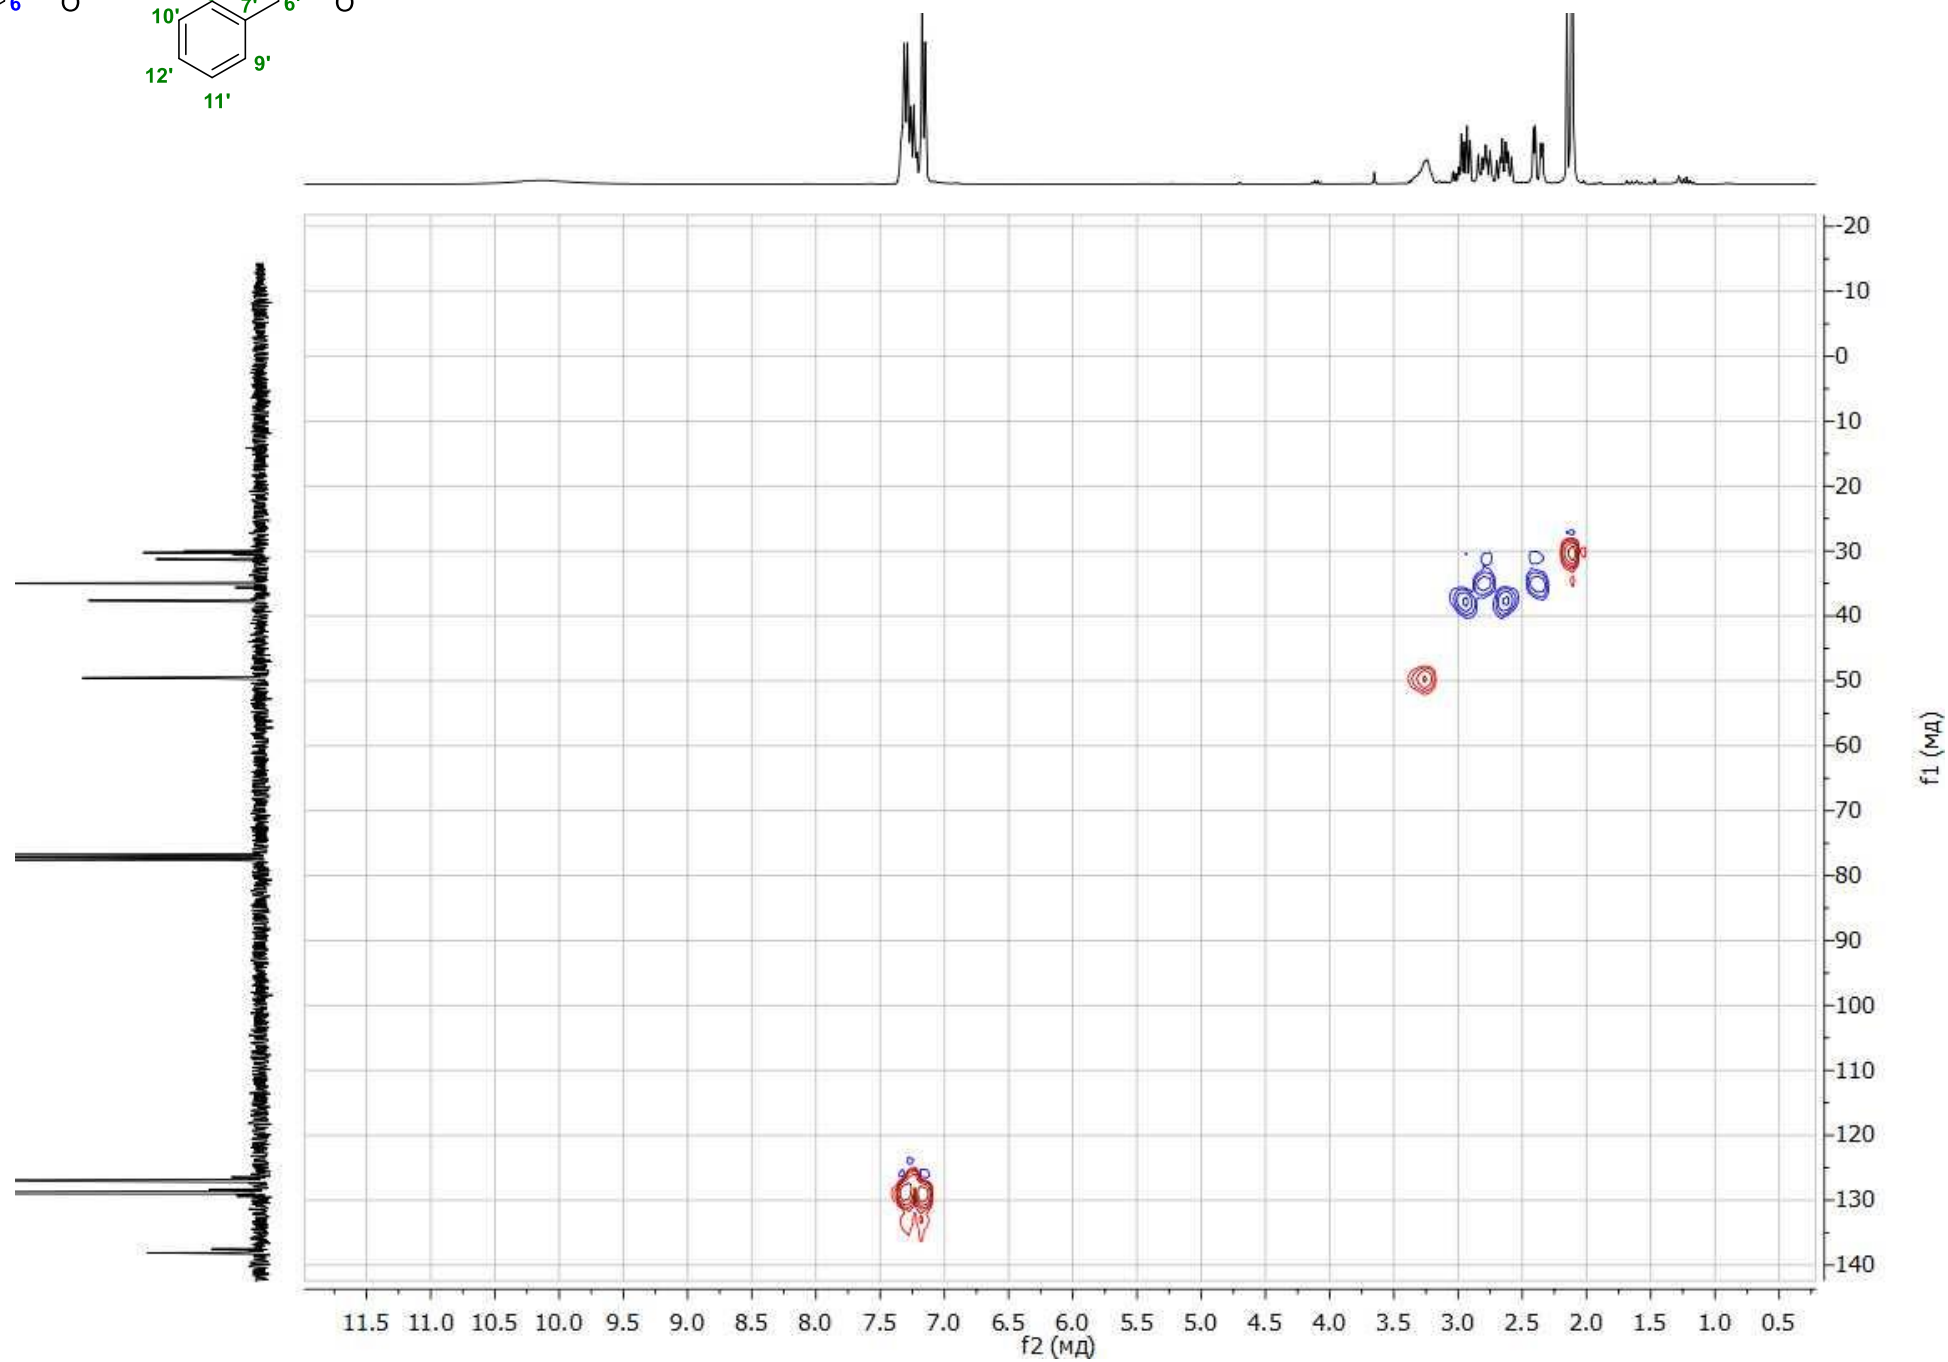

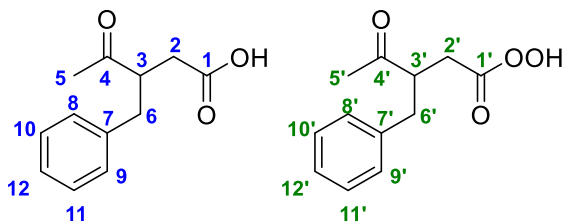

{<sup>1</sup>H-<sup>13</sup>C} HMBC

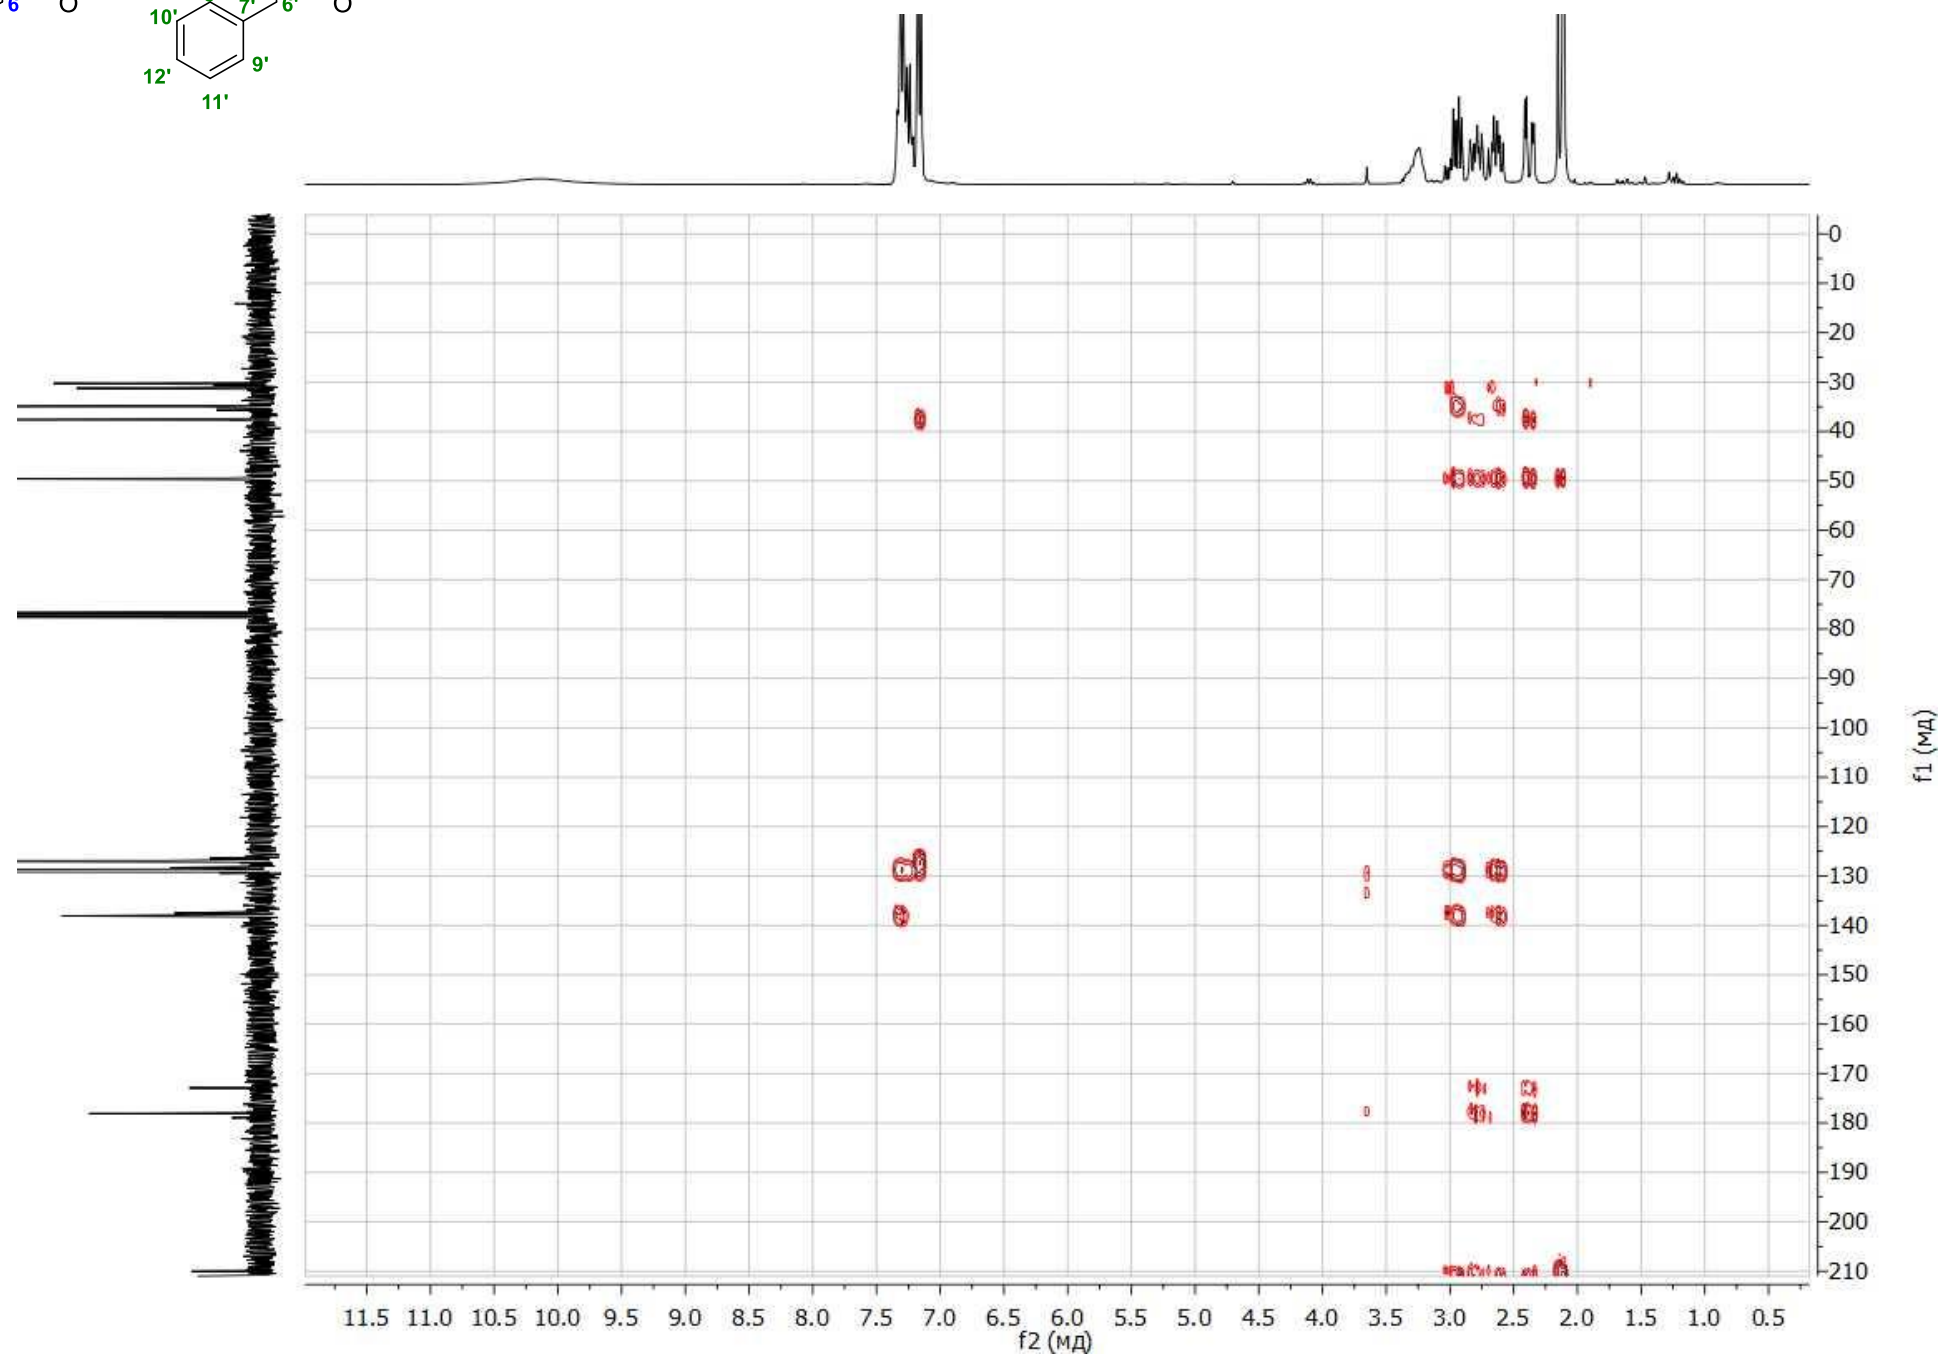

### 3-Benzyl-4-oxopentanoic acid, 5a

#### <sup>1</sup>H NMR

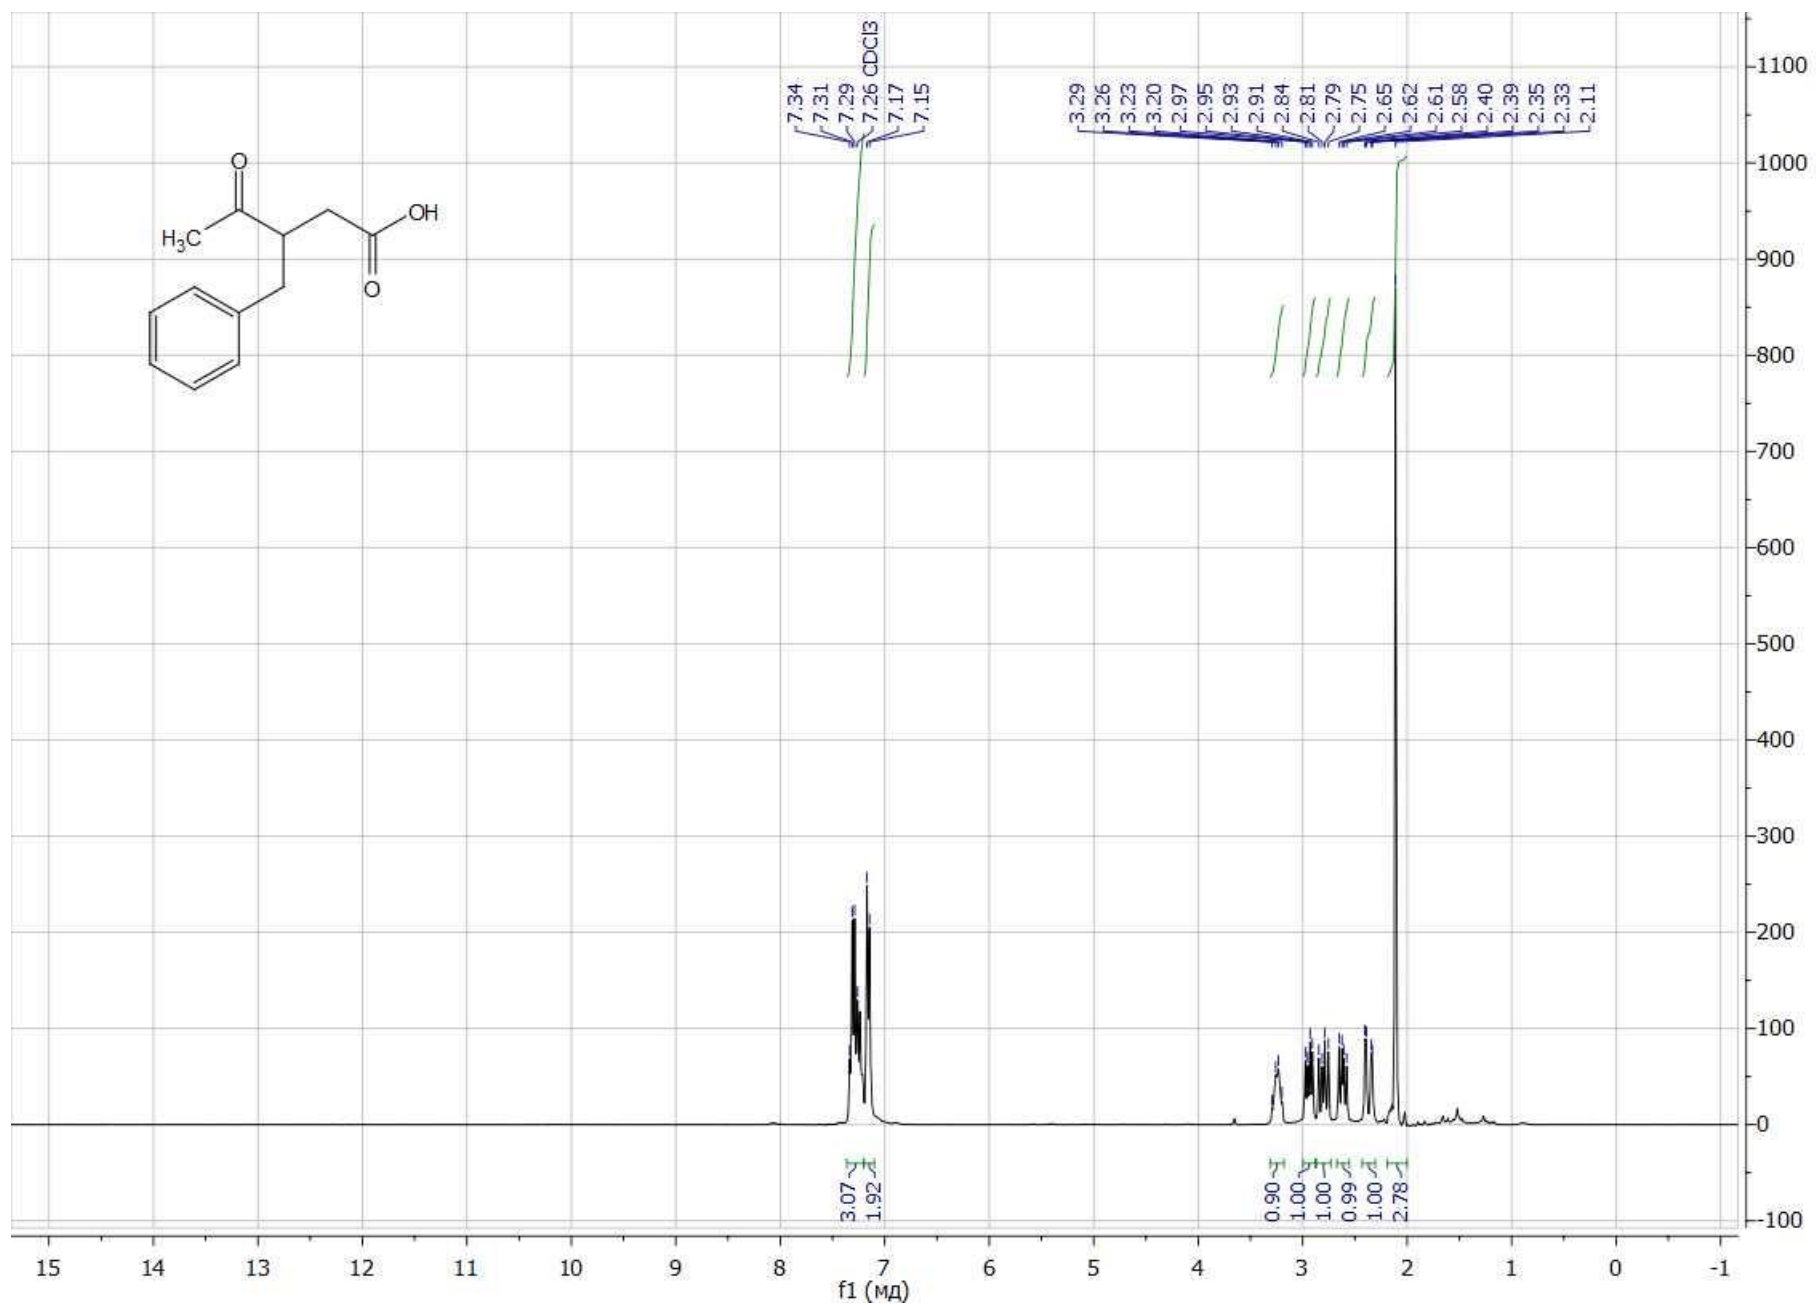

<sup>13</sup>C NMR

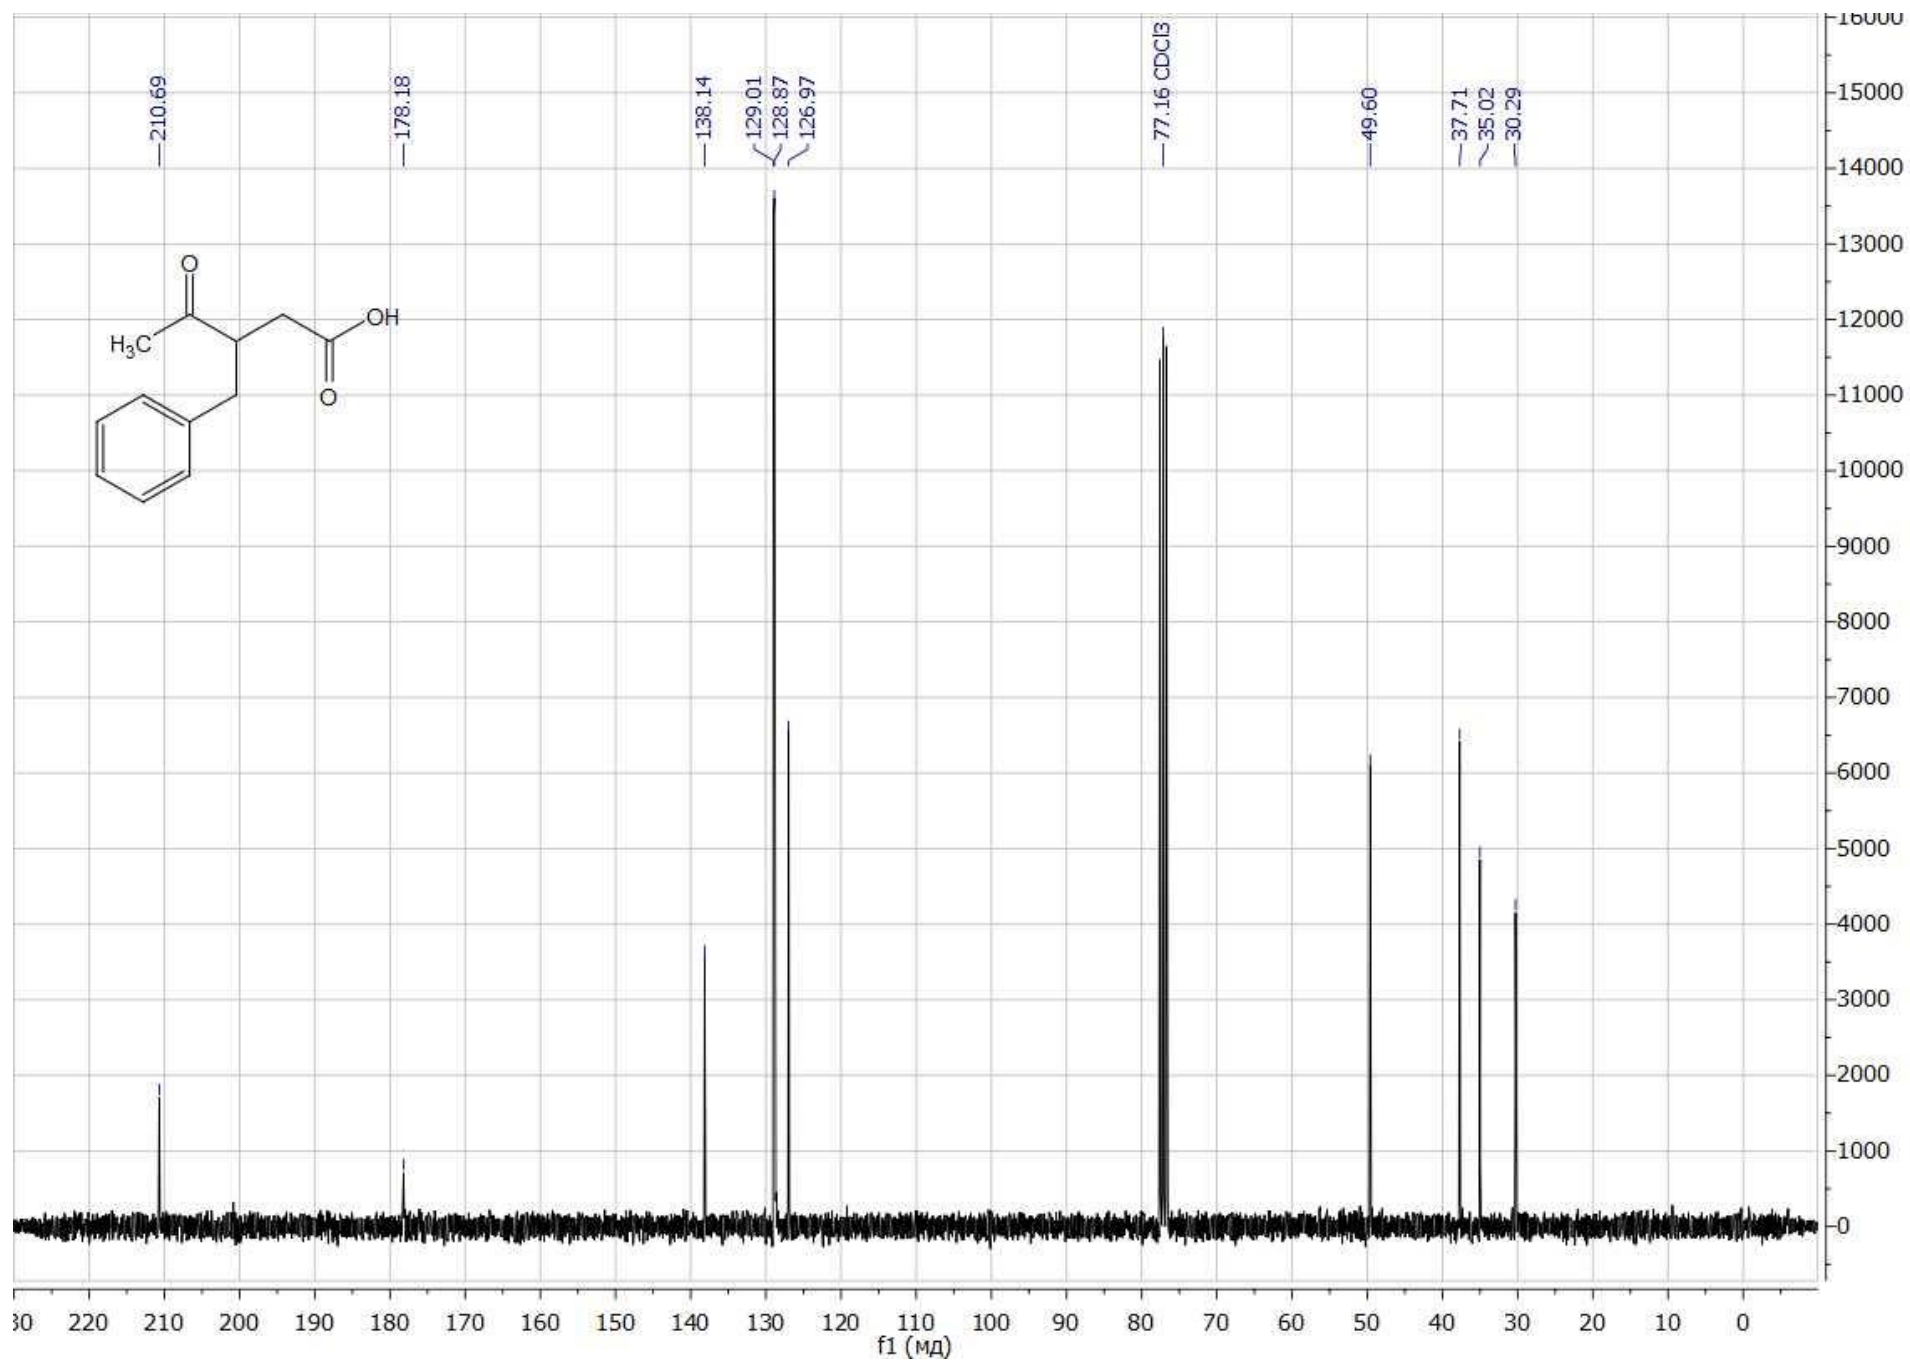



HRMS data of  $\gamma$ -hydroperoxy- $\gamma$ -peroxylactones 2 and other products  
5-Benzyl-6-hydroperoxy-6-methyl-1,2-dioxan-3-one, 2a

Display Report

Analysis Info

Analysis Name D:\Data\Kolotyrkina\2019\Vi\0903033.d  
Method tune\_50-1600.m  
Sample Name /TERN BB2137  
Comment C12H14O5 mH 239.0914 calibrant added

Acquisition Date 03.09.2019 17:06:22  
Operator BDAL@DE  
Instrument / Ser# micrOTOF 10248

Acquisition Parameter

|             |            |                      |          |                  |           |
|-------------|------------|----------------------|----------|------------------|-----------|
| Source Type | ESI        | Ion Polarity         | Positive | Set Nebulizer    | 1.0 Bar   |
| Focus       | Not active |                      |          | Set Dry Heater   | 200 °C    |
| Scan Begin  | 50 m/z     | Set Capillary        | 4500 V   | Set Dry Gas      | 4.0 l/min |
| Scan End    | 1600 m/z   | Set End Plate Offset | -500 V   | Set Divert Valve | Waste     |

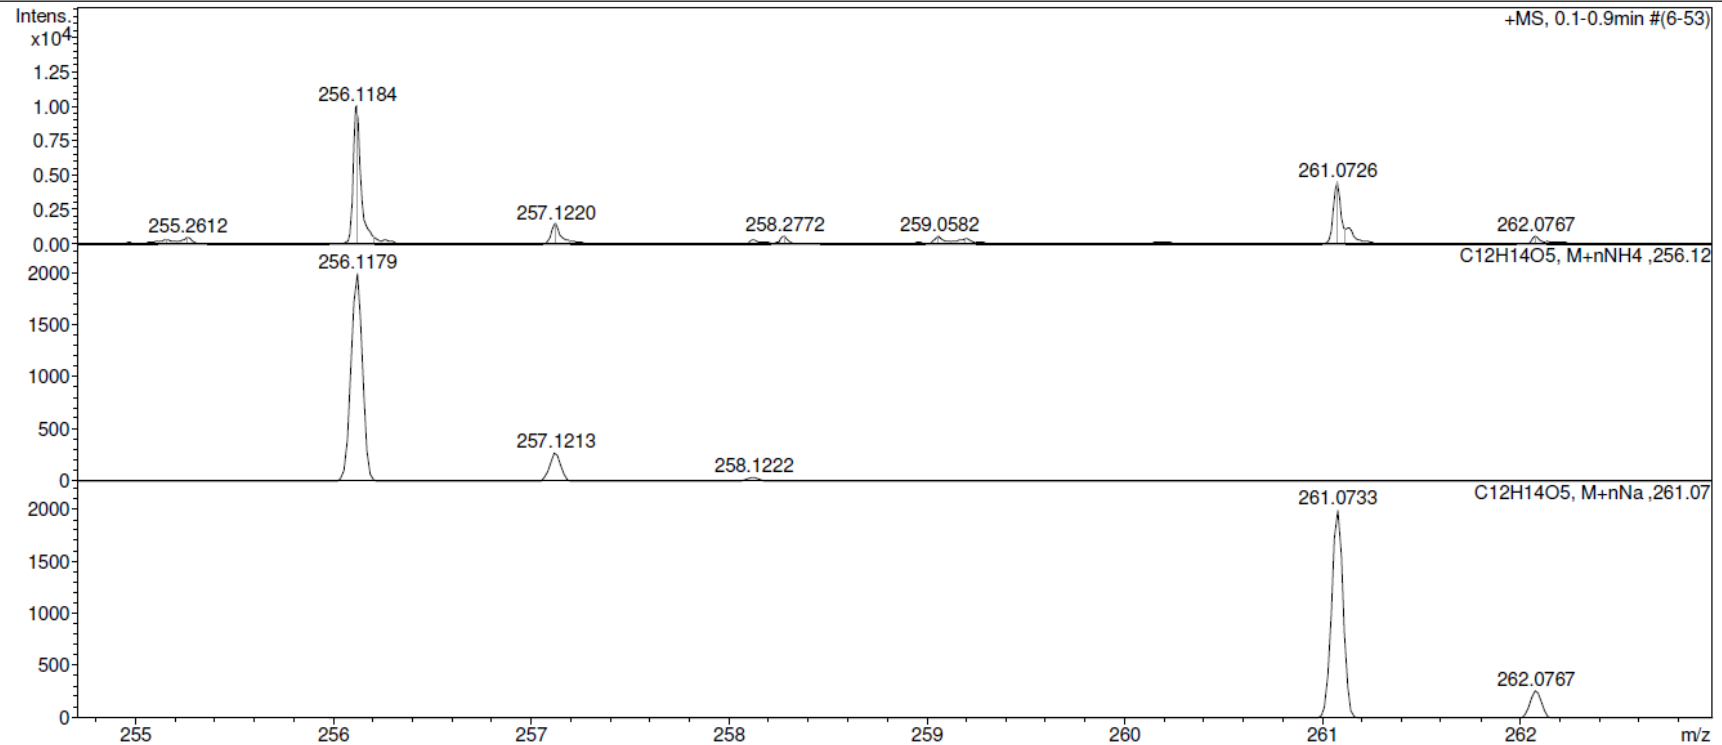

# 6-Hydroperoxy-6-methyl-5-(4-nitrobenzyl)-1,2-dioxan-3-one, 2b

## Display Report

### Analysis Info

Analysis Name D:\Data\Kolotyrkina\2019\VII\0903031.d  
Method tune\_50-1600.m  
Sample Name /TERN BB2150  
Comment C12H13NO7 mH 284.0764 calibrant added

Acquisition Date 03.09.2019 16:53:48  
Operator BDAL@DE  
Instrument / Ser# micrOTOF 10248

### Acquisition Parameter

|             |            |                      |          |                  |           |
|-------------|------------|----------------------|----------|------------------|-----------|
| Source Type | ESI        | Ion Polarity         | Positive | Set Nebulizer    | 1.0 Bar   |
| Focus       | Not active |                      |          | Set Dry Heater   | 200 °C    |
| Scan Begin  | 50 m/z     | Set Capillary        | 4500 V   | Set Dry Gas      | 4.0 l/min |
| Scan End    | 1600 m/z   | Set End Plate Offset | -500 V   | Set Divert Valve | Waste     |

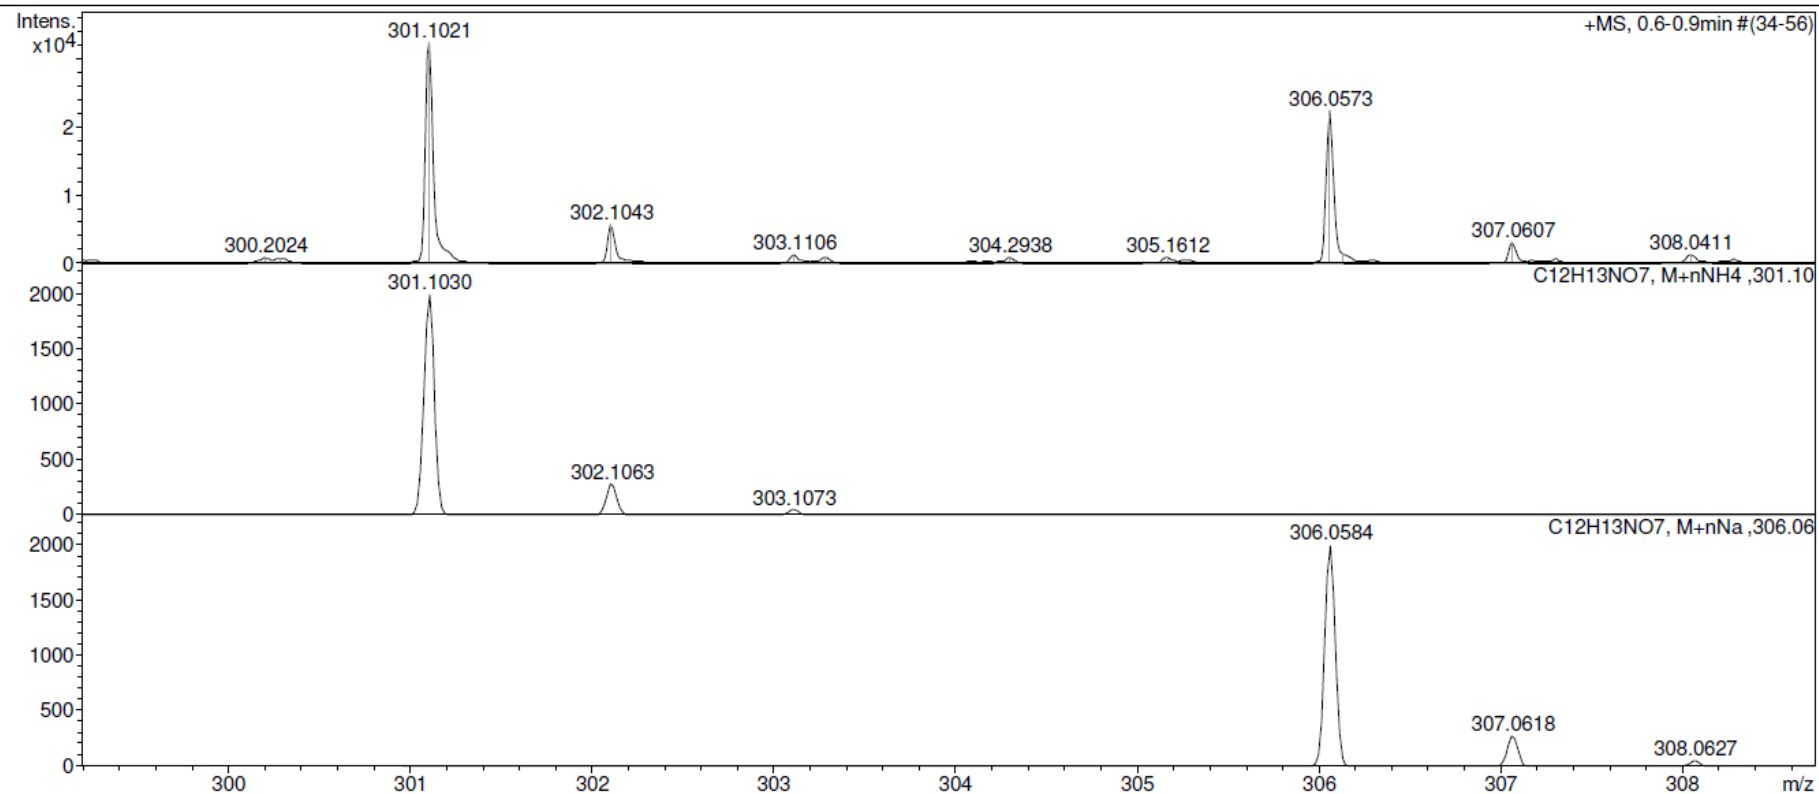

5-(4-Chlorobenzyl)-6-hydroperoxy-6-methyl-1,2-dioxan-3-one, 2c

Display Report

Analysis Info

Analysis Name D:\Data\Kolotyrkina\2019\VII\0905009.d  
 Method tune\_50-1600.m  
 Sample Name /TERN BB2153  
 Comment C12H13ClO5 mH 273.0524 calibrant added

Acquisition Date 05.09.2019 15:18:14  
 Operator BDAL@DE  
 Instrument / Ser# micrOTOF 10248

Acquisition Parameter

|             |            |                      |          |                  |           |
|-------------|------------|----------------------|----------|------------------|-----------|
| Source Type | ESI        | Ion Polarity         | Positive | Set Nebulizer    | 1.0 Bar   |
| Focus       | Not active |                      |          | Set Dry Heater   | 200 °C    |
| Scan Begin  | 50 m/z     | Set Capillary        | 4500 V   | Set Dry Gas      | 4.0 l/min |
| Scan End    | 1600 m/z   | Set End Plate Offset | -500 V   | Set Divert Valve | Waste     |

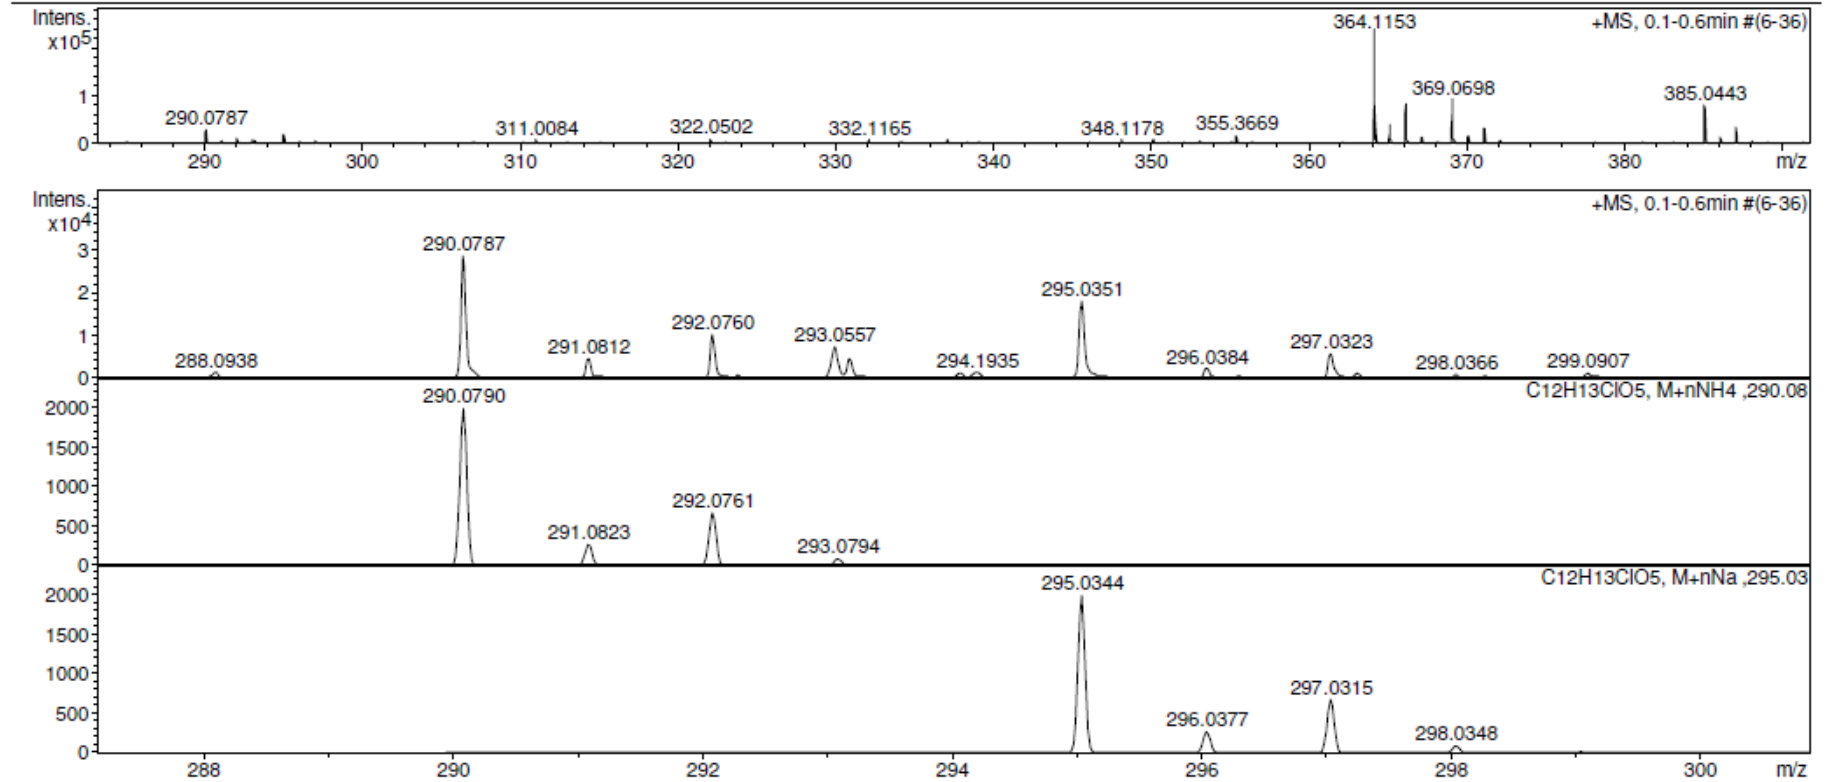

# 5-(4-Bromobenzyl)-6-hydroperoxy-6-methyl-1,2-dioxan-3-one, 2d

## Display Report

### Analysis Info

Analysis Name D:\Data\Kolotyorkina\2019\Barsegyan\1120063.d  
Method tune\_50-1600.m  
Sample Name /TERN Brs362  
Comment C12H13BrO5 mH 317.0030 calibrant added

Acquisition Date 20.11.2019 18:29:26  
Operator BDAL@DE  
Instrument / Ser# micrOTOF 10248

### Acquisition Parameter

|             |            |                      |          |                  |           |
|-------------|------------|----------------------|----------|------------------|-----------|
| Source Type | ESI        | Ion Polarity         | Positive | Set Nebulizer    | 1.0 Bar   |
| Focus       | Not active |                      |          | Set Dry Heater   | 200 °C    |
| Scan Begin  | 50 m/z     | Set Capillary        | 4500 V   | Set Dry Gas      | 4.0 l/min |
| Scan End    | 1600 m/z   | Set End Plate Offset | -500 V   | Set Divert Valve | Waste     |

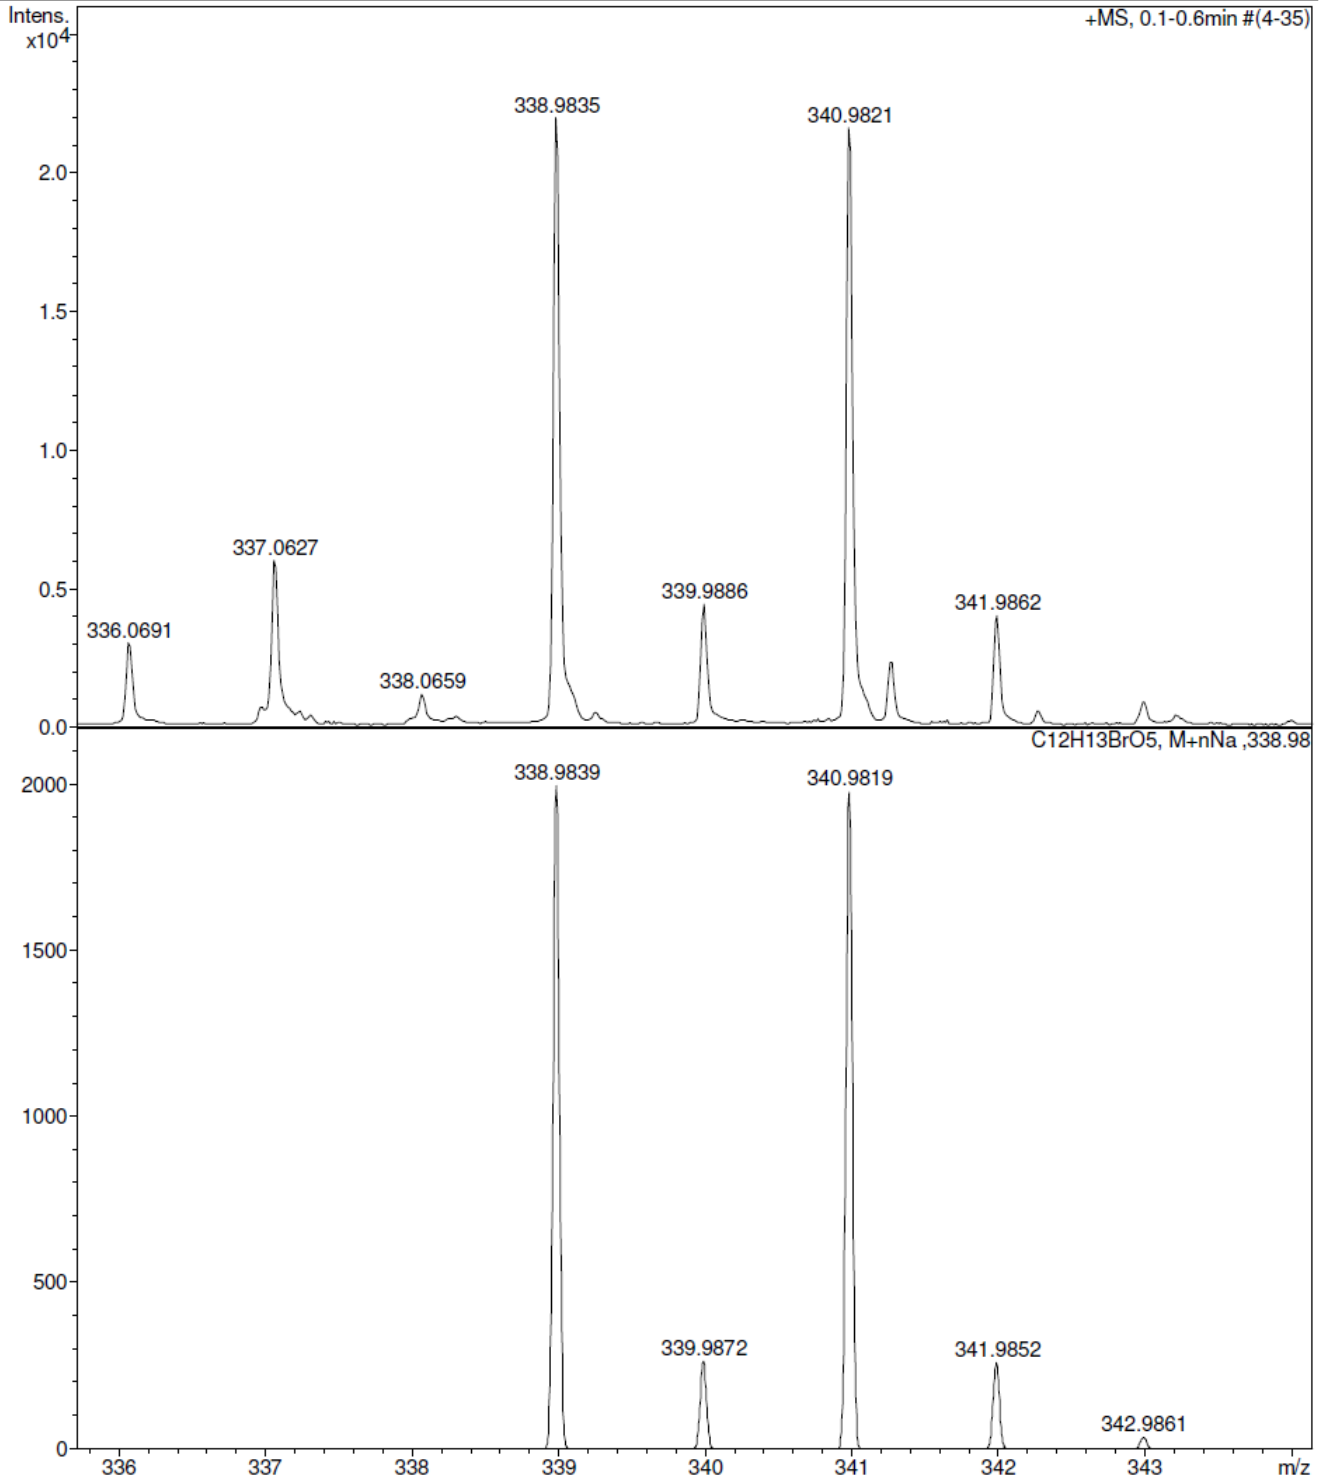

## Display Report

## Analysis Info

Analysis Name D:\Data\Kolotyrkina\2019\Vi\0905010.d  
Method tune\_50-1600.m  
Sample Name /TERN BB2155  
Comment C16H22O5 mH 295.1540 calibrant added

Acquisition Date 05.09.2019 15:27:15  
Operator BDAL@DE  
Instrument / Ser# microTOF 10248

## Acquisition Parameter

|             |            |                      |          |                  |           |
|-------------|------------|----------------------|----------|------------------|-----------|
| Source Type | ESI        | Ion Polarity         | Positive | Set Nebulizer    | 1.0 Bar   |
| Focus       | Not active |                      |          | Set Dry Heater   | 200 °C    |
| Scan Begin  | 50 m/z     | Set Capillary        | 4500 V   | Set Dry Gas      | 4.0 l/min |
| Scan End    | 1600 m/z   | Set End Plate Offset | -500 V   | Set Divert Valve | Waste     |

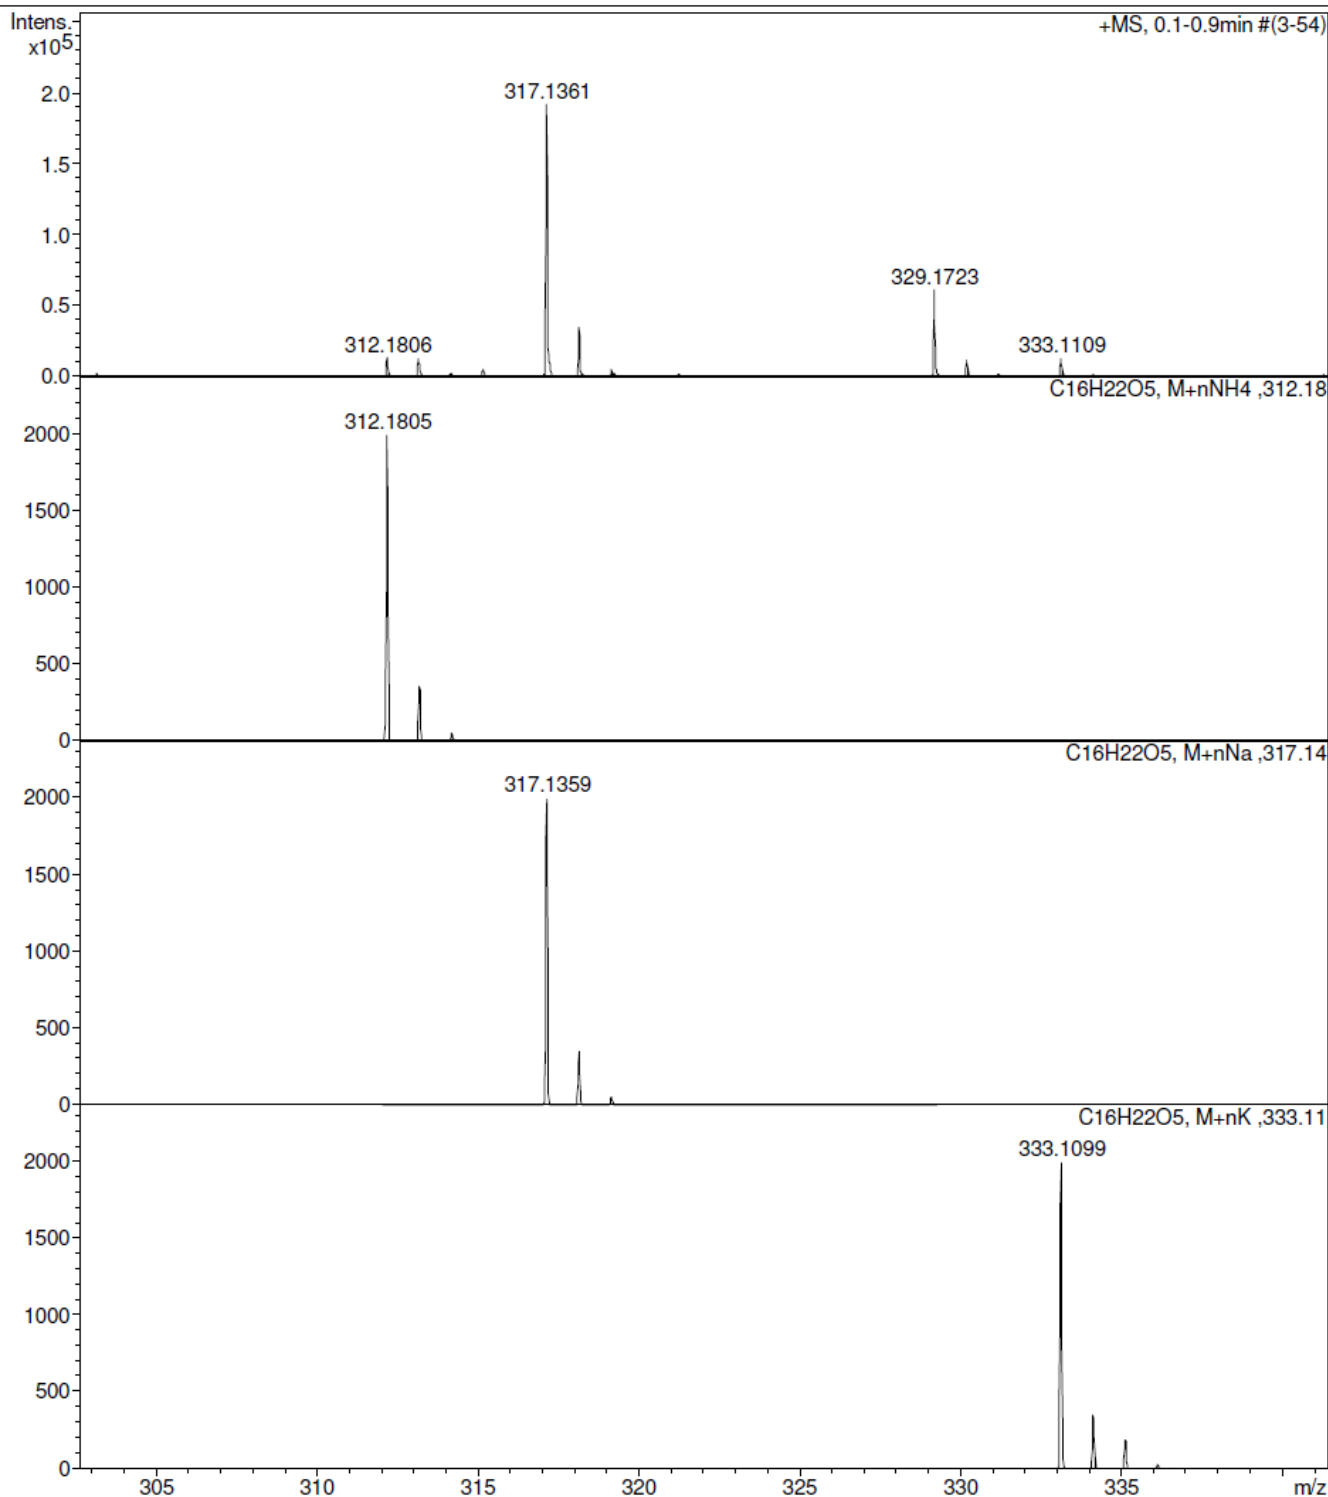

# 6-Hydroperoxy-6-methyl-5-(4-methylbenzyl)-1,2-dioxan-3-one, 2f

## Display Report

### Analysis Info

Analysis Name D:\Data\Kolotyrkina\2019\Barsegyan\1205035.d  
Method tune\_50-1600.m  
Sample Name /TERN Brs391  
Comment C13H16O5 mH 253.1070 calibrant added

Acquisition Date 05.12.2019 16:20:39  
Operator BDAL@DE  
Instrument / Ser# microTOF 10248

### Acquisition Parameter

|             |            |                      |          |                  |           |
|-------------|------------|----------------------|----------|------------------|-----------|
| Source Type | ESI        | Ion Polarity         | Positive | Set Nebulizer    | 1.0 Bar   |
| Focus       | Not active |                      |          | Set Dry Heater   | 200 °C    |
| Scan Begin  | 50 m/z     | Set Capillary        | 4500 V   | Set Dry Gas      | 4.0 l/min |
| Scan End    | 1600 m/z   | Set End Plate Offset | -500 V   | Set Divert Valve | Waste     |

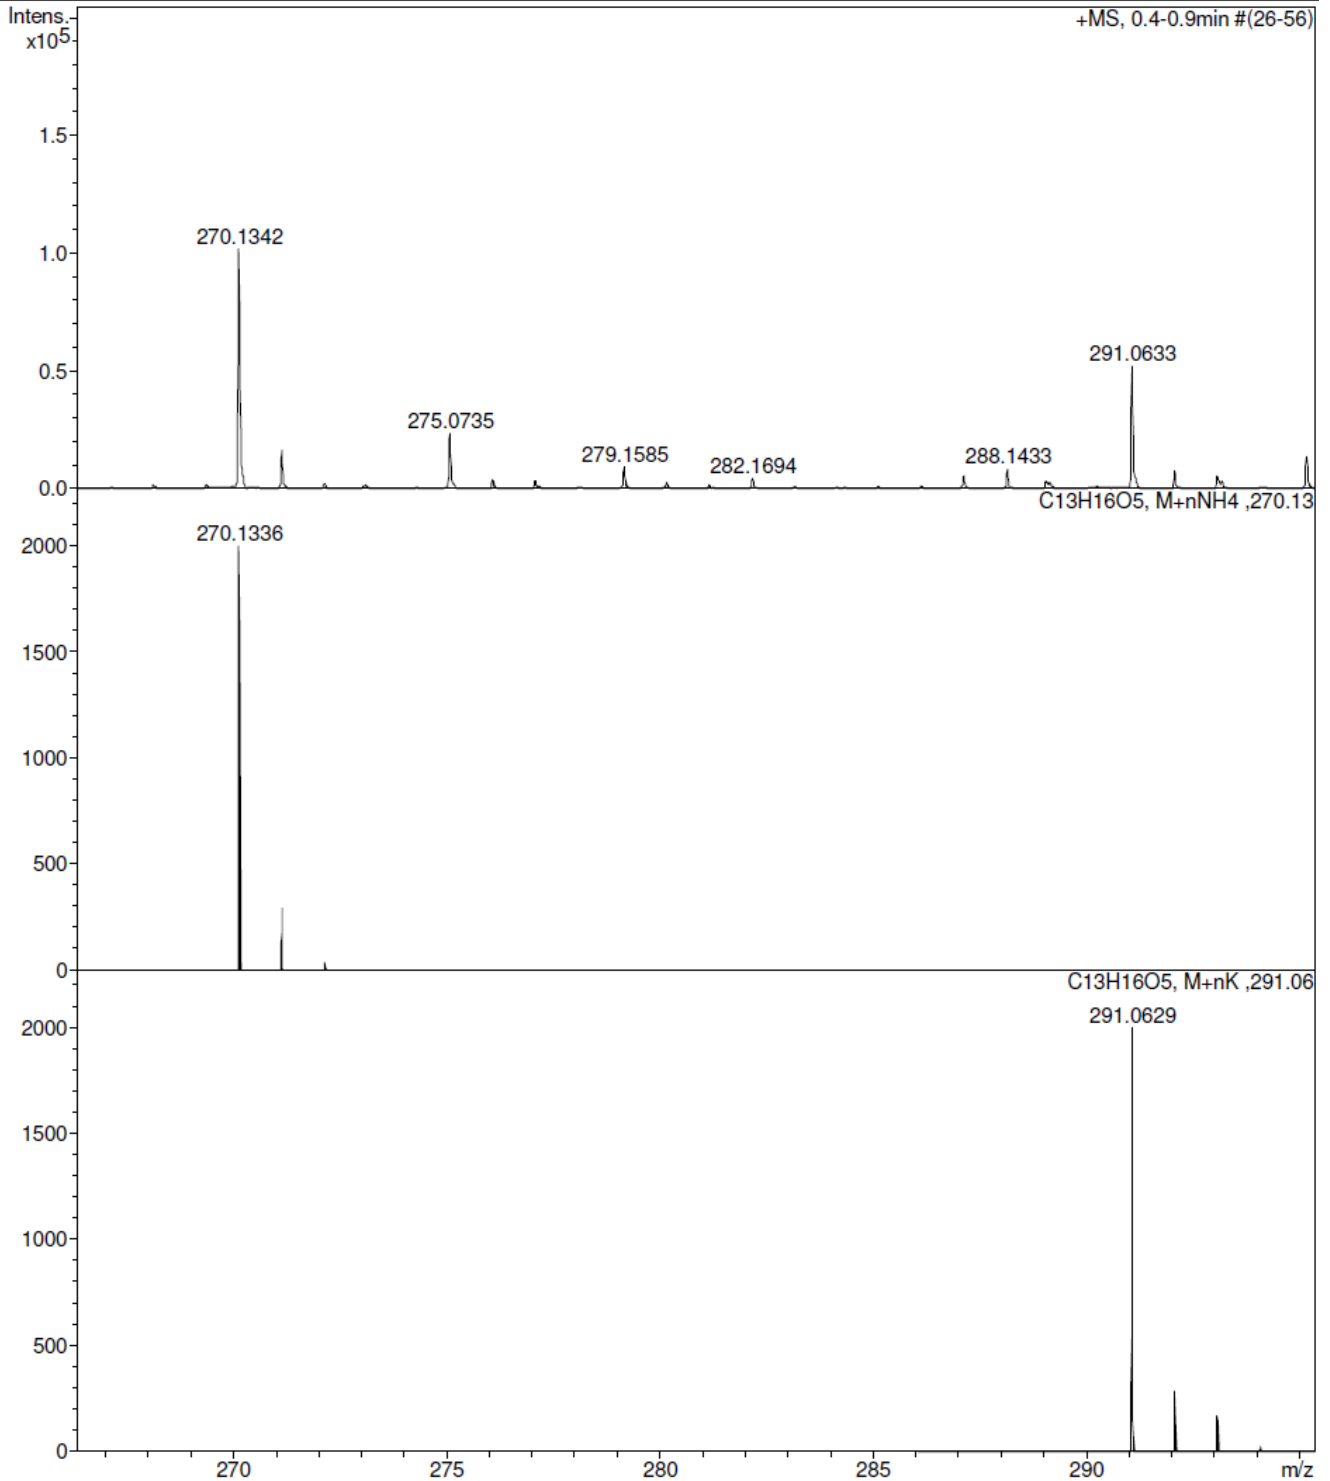

# 6-Hydroperoxy-6-methyl-5-(3-methylbenzyl)-1,2-dioxan-3-one, 2g

## Display Report

### Analysis Info

Analysis Name D:\Data\Kolotyrkina\2019\Vir\1017025.d  
Method tune\_50-1600.m  
Sample Name /TERN SE-30  
Comment C13H16O5 mH 253.1070 calibrant added

Acquisition Date 17.10.2019 17:06:52  
Operator BDAL@DE  
Instrument / Ser# micrOTOF 10248

### Acquisition Parameter

|             |            |                      |          |                  |           |
|-------------|------------|----------------------|----------|------------------|-----------|
| Source Type | ESI        | Ion Polarity         | Positive | Set Nebulizer    | 1.0 Bar   |
| Focus       | Not active |                      |          | Set Dry Heater   | 200 °C    |
| Scan Begin  | 50 m/z     | Set Capillary        | 4500 V   | Set Dry Gas      | 4.0 l/min |
| Scan End    | 1600 m/z   | Set End Plate Offset | -500 V   | Set Divert Valve | Waste     |

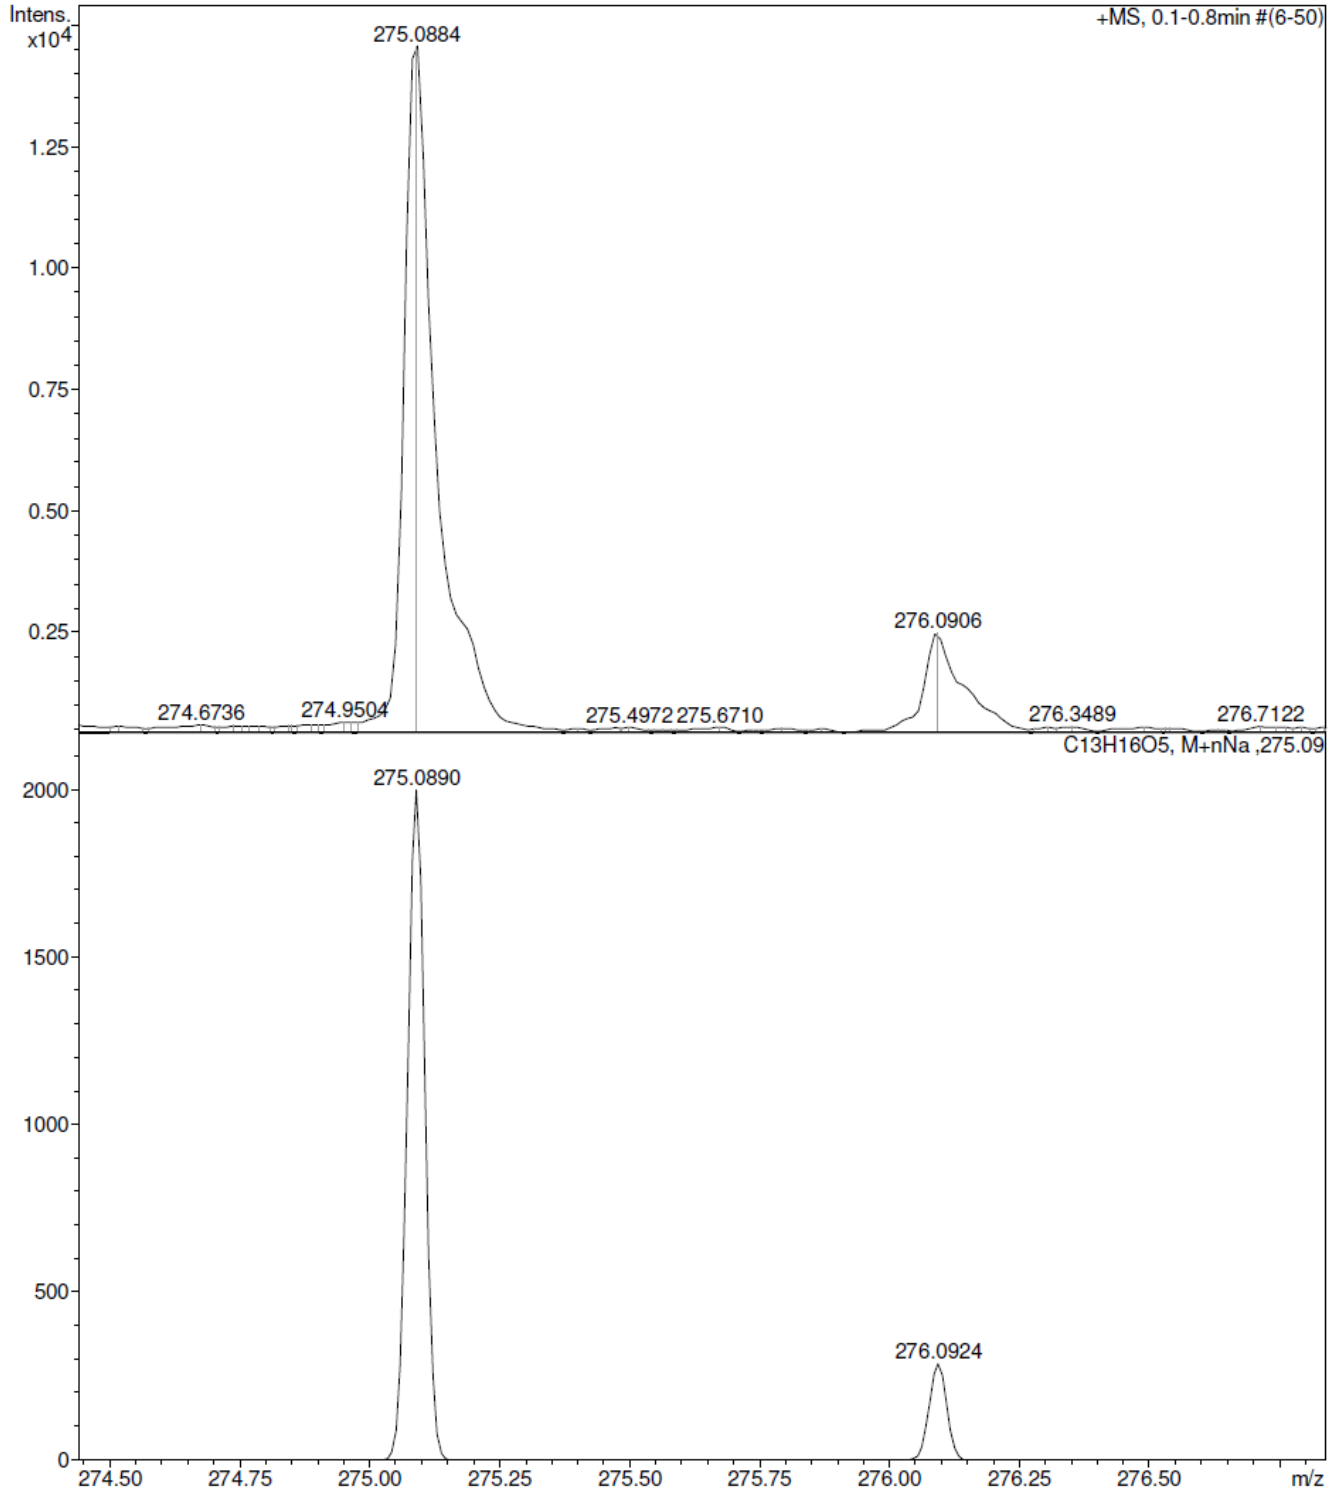

# 6-Hydroperoxy-5-(3-methoxybenzyl)-6-methyl-1,2-dioxan-3-one, 2h

## Display Report

### Analysis Info

Analysis Name D:\Data\Kolotyrkina\2019\Barsegyan\1113017.d  
Method tune\_50-1600.m  
Sample Name /TERN Brs371  
Comment C13H16O6 mH 269.1019 calibrant added

Acquisition Date 13.11.2019 17:00:22  
Operator BDAL@DE  
Instrument / Ser# micrOTOF 10248

### Acquisition Parameter

|             |            |                      |          |                  |           |
|-------------|------------|----------------------|----------|------------------|-----------|
| Source Type | ESI        | Ion Polarity         | Positive | Set Nebulizer    | 1.0 Bar   |
| Focus       | Not active |                      |          | Set Dry Heater   | 200 °C    |
| Scan Begin  | 50 m/z     | Set Capillary        | 4500 V   | Set Dry Gas      | 4.0 l/min |
| Scan End    | 1600 m/z   | Set End Plate Offset | -500 V   | Set Divert Valve | Waste     |

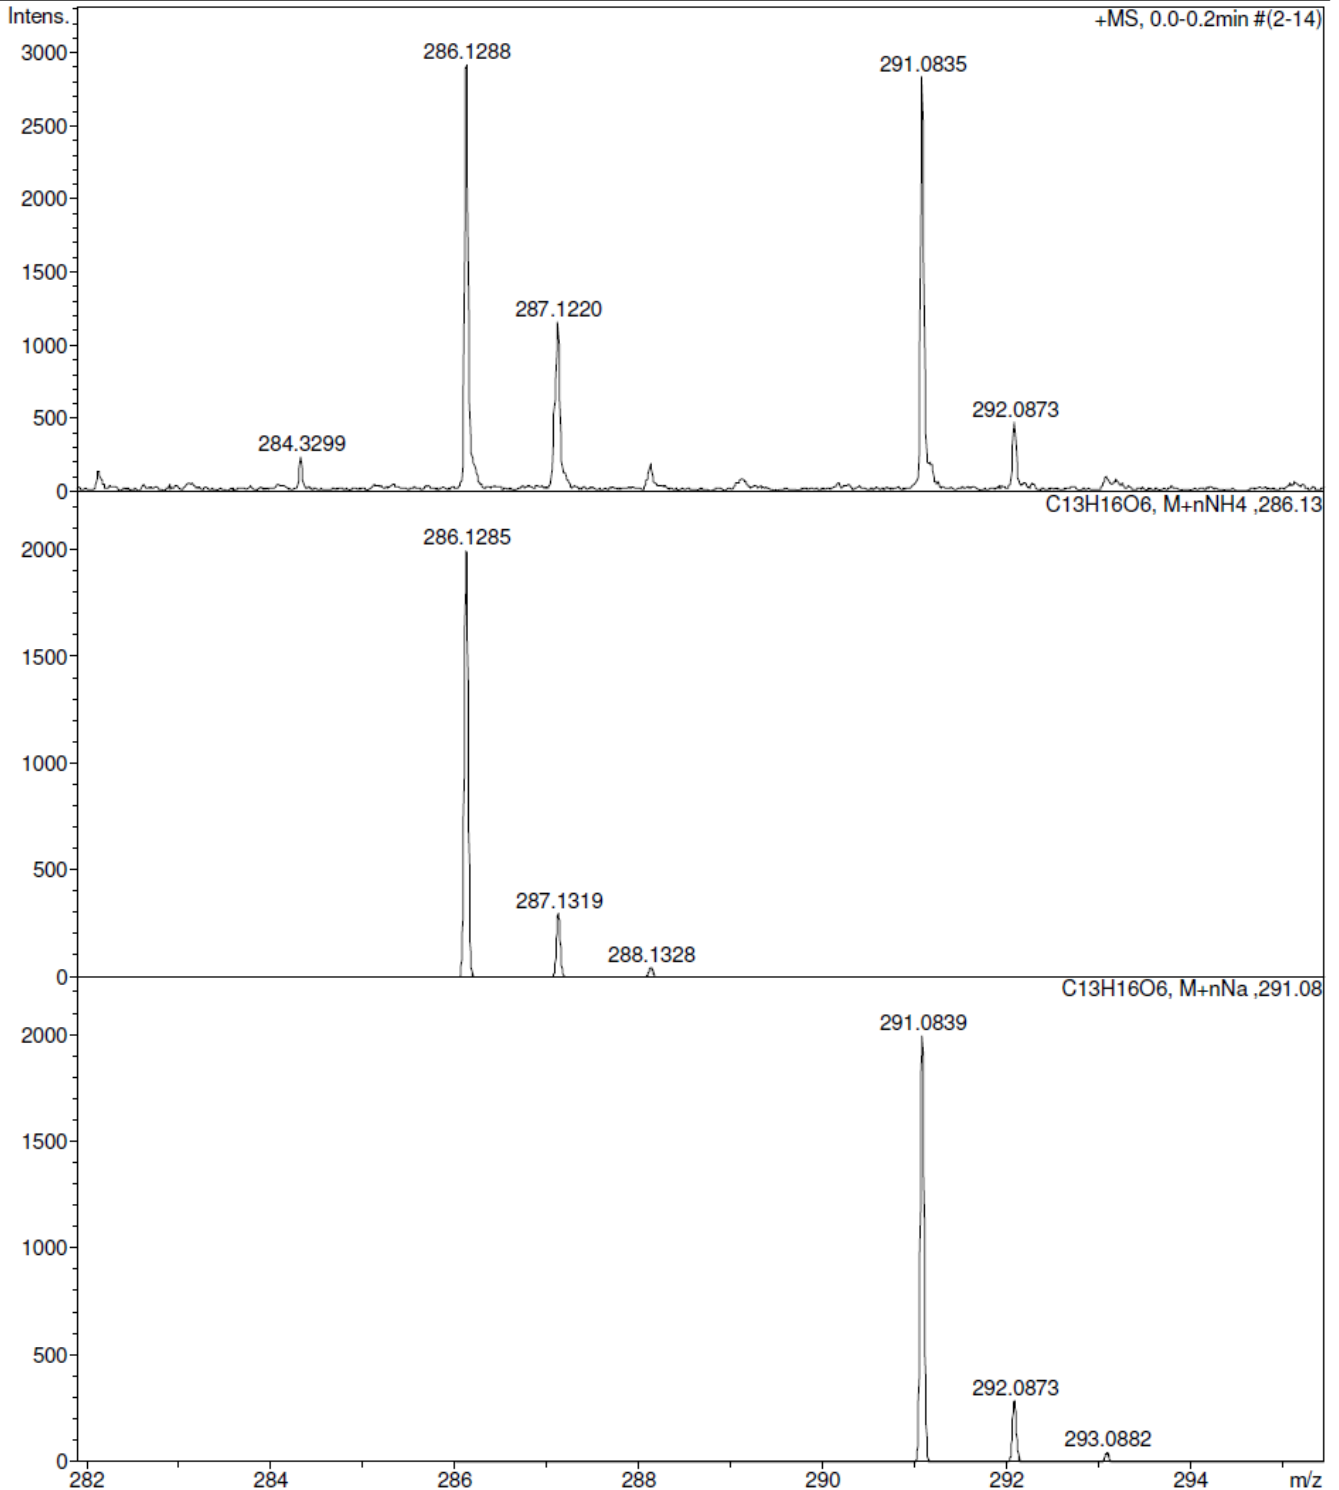



# 5-(2-Chlorobenzyl)-6-hydroperoxy-6-methyl-1,2-dioxan-3-one, 2i

## Display Report

### Analysis Info

Analysis Name D:\Data\Kolotyrkina\2019\Barsegyan\1128034.d  
Method tune\_50-1600.m  
Sample Name /TERN Brs383  
Comment C12H13ClO5 mH 273.0524 calibrant added CH3CN

Acquisition Date 28.11.2019 16:31:52  
Operator BDAL@DE  
Instrument / Ser# micrOTOF 10248

### Acquisition Parameter

|             |            |                      |          |                  |           |
|-------------|------------|----------------------|----------|------------------|-----------|
| Source Type | ESI        | Ion Polarity         | Positive | Set Nebulizer    | 1.0 Bar   |
| Focus       | Not active |                      |          | Set Dry Heater   | 200 °C    |
| Scan Begin  | 50 m/z     | Set Capillary        | 4500 V   | Set Dry Gas      | 4.0 l/min |
| Scan End    | 1600 m/z   | Set End Plate Offset | -500 V   | Set Divert Valve | Waste     |

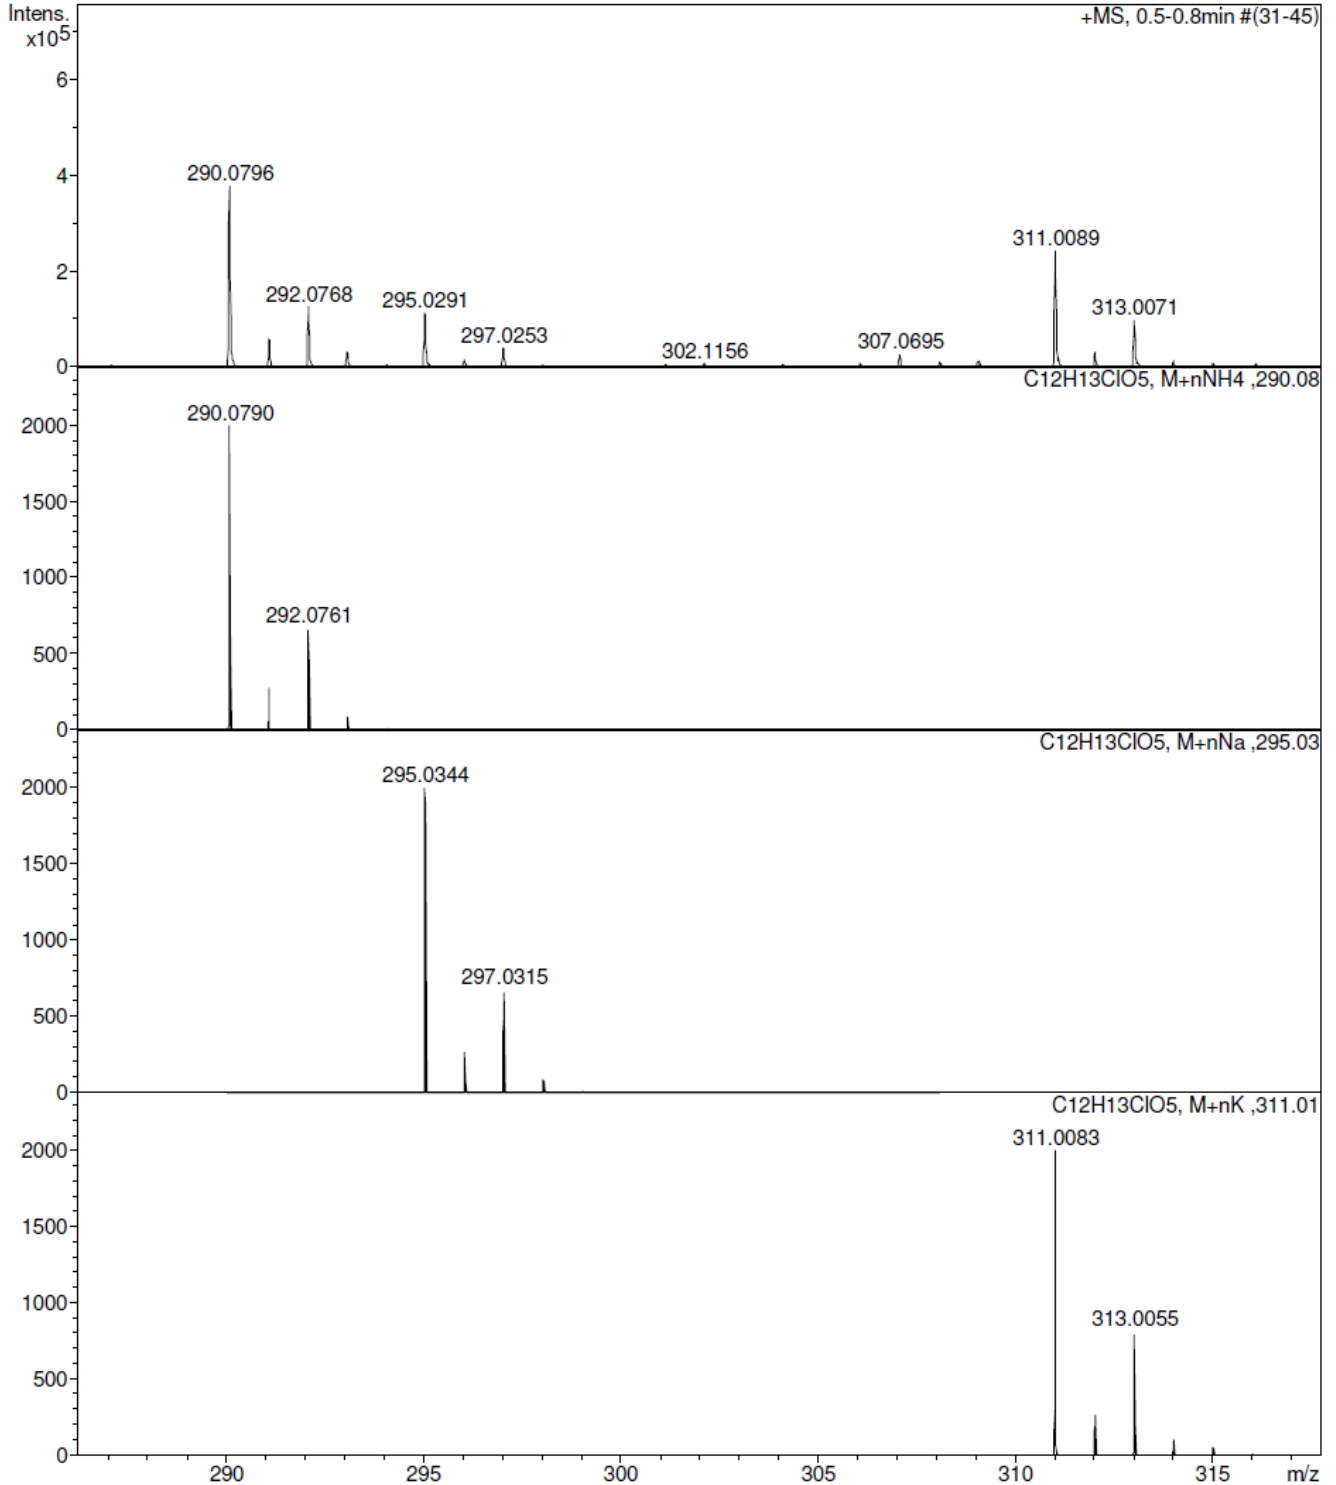

# Display Report

## Analysis Info

Analysis Name D:\Data\Kolotyrkina\2019\Barsegyan\0925015.d  
Method tune\_50-1600.m  
Sample Name /TERN Brs328  
Comment C9H16O5 mH 205.1070 calibrant added

Acquisition Date 25.09.2019 15:06:00  
Operator BDAL@DE  
Instrument / Ser# micrOTOF 10248

## Acquisition Parameter

|             |            |                      |          |                  |           |
|-------------|------------|----------------------|----------|------------------|-----------|
| Source Type | ESI        | Ion Polarity         | Positive | Set Nebulizer    | 1.0 Bar   |
| Focus       | Not active |                      |          | Set Dry Heater   | 200 °C    |
| Scan Begin  | 50 m/z     | Set Capillary        | 4500 V   | Set Dry Gas      | 4.0 l/min |
| Scan End    | 1600 m/z   | Set End Plate Offset | -500 V   | Set Divert Valve | Waste     |

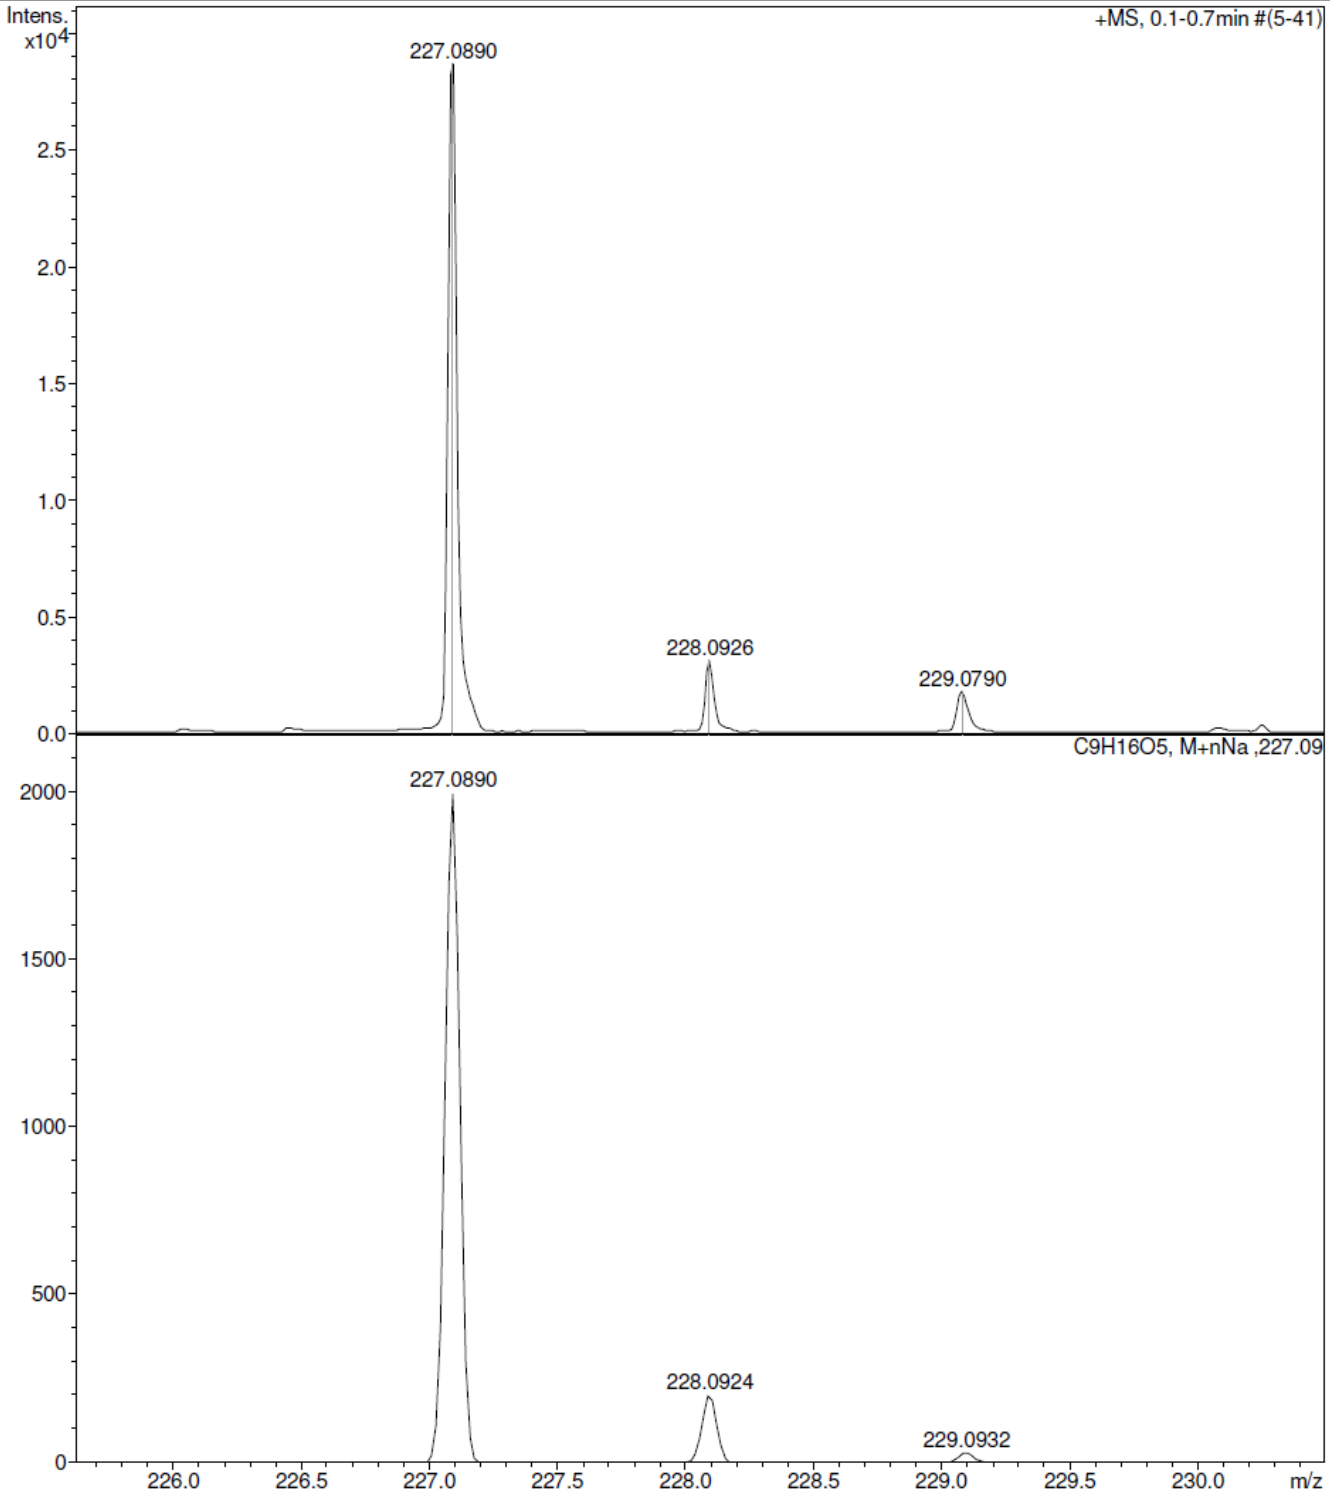

# 5-Hexyl-6-hydroperoxy-6-methyl-1,2-dioxan-3-one, 2k

## Display Report

### Analysis Info

Analysis Name D:\Data\Kolotyrykina\2019\Barsegyan\1113020.d  
Method tune\_50-1600.m  
Sample Name /TERN Brs361  
Comment C11H20O5 mH 233.1383 calibrant added

Acquisition Date 13.11.2019 17:32:15  
Operator BDAL@DE  
Instrument / Ser# micrOTOF 10248

### Acquisition Parameter

|             |            |                      |          |                  |           |
|-------------|------------|----------------------|----------|------------------|-----------|
| Source Type | ESI        | Ion Polarity         | Positive | Set Nebulizer    | 1.0 Bar   |
| Focus       | Not active |                      |          | Set Dry Heater   | 200 °C    |
| Scan Begin  | 50 m/z     | Set Capillary        | 4500 V   | Set Dry Gas      | 4.0 l/min |
| Scan End    | 1600 m/z   | Set End Plate Offset | -500 V   | Set Divert Valve | Waste     |

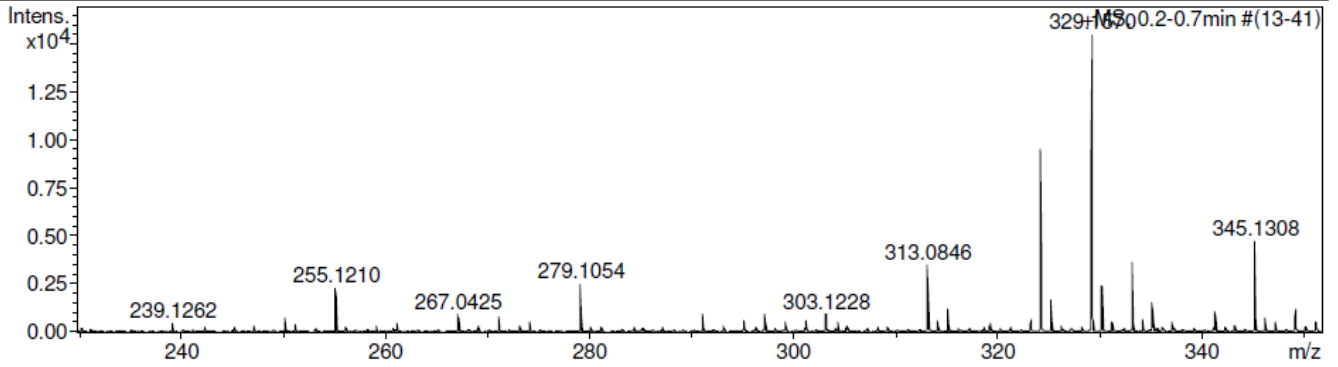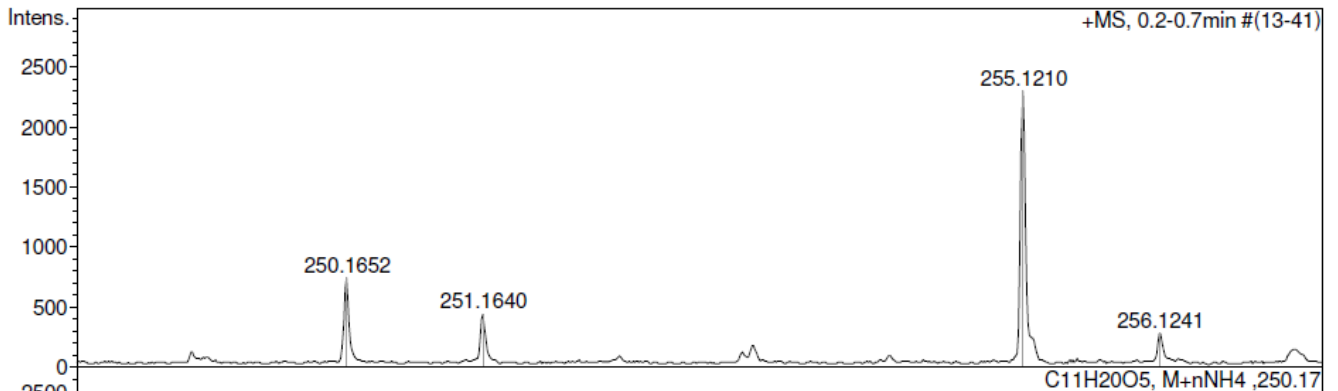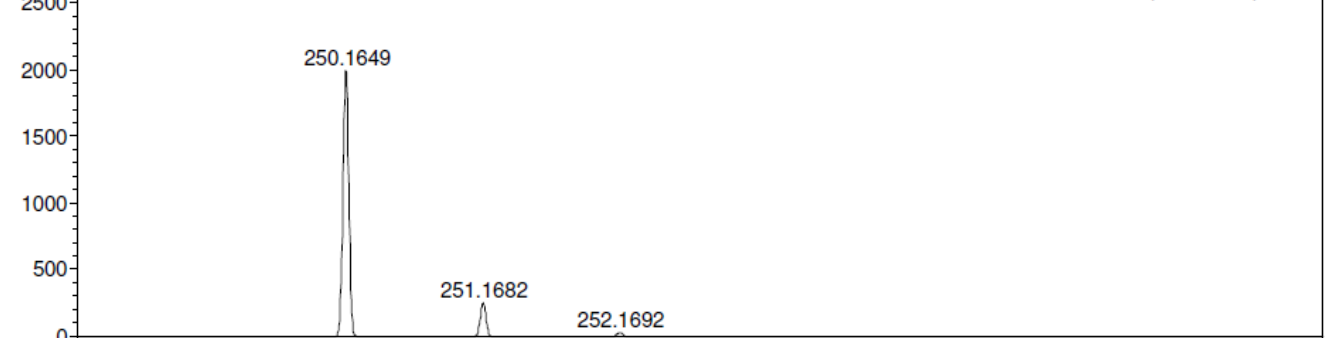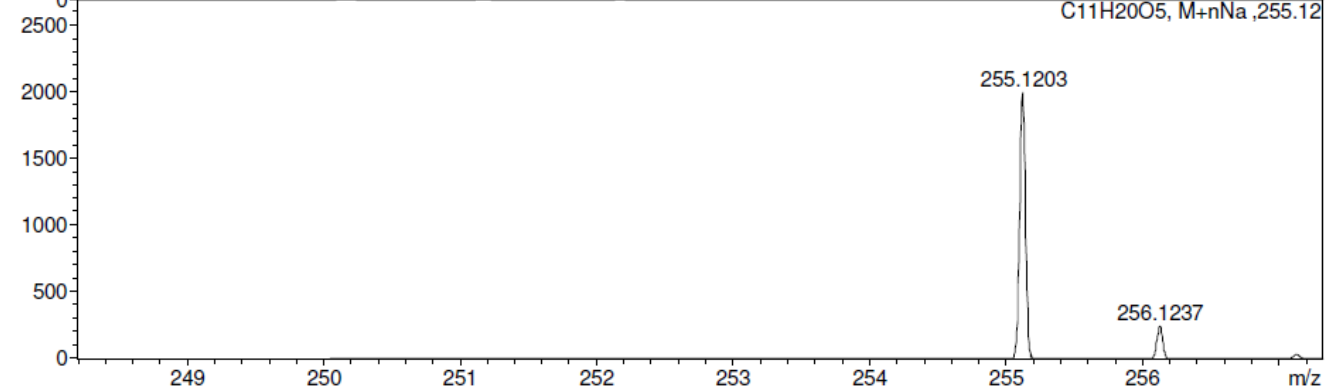

# 6-Hydroperoxy-6-methyl-5-octyl-1,2-dioxan-3-one, 2I

## Display Report

### Analysis Info

Analysis Name D:\Data\Kolotyrkina\2019\Barsegyan\1010028.d  
Method tune\_50-1600.m  
Sample Name /TERN Brs331  
Comment C13H24O5 mH 261.1696 calibrant added

Acquisition Date 10.10.2019 18:24:46  
Operator BDAL@DE  
Instrument / Ser# micrOTOF 10248

### Acquisition Parameter

|             |            |                      |          |                  |           |
|-------------|------------|----------------------|----------|------------------|-----------|
| Source Type | ESI        | Ion Polarity         | Positive | Set Nebulizer    | 1.0 Bar   |
| Focus       | Not active |                      |          | Set Dry Heater   | 200 °C    |
| Scan Begin  | 50 m/z     | Set Capillary        | 4500 V   | Set Dry Gas      | 4.0 l/min |
| Scan End    | 1600 m/z   | Set End Plate Offset | -500 V   | Set Divert Valve | Waste     |

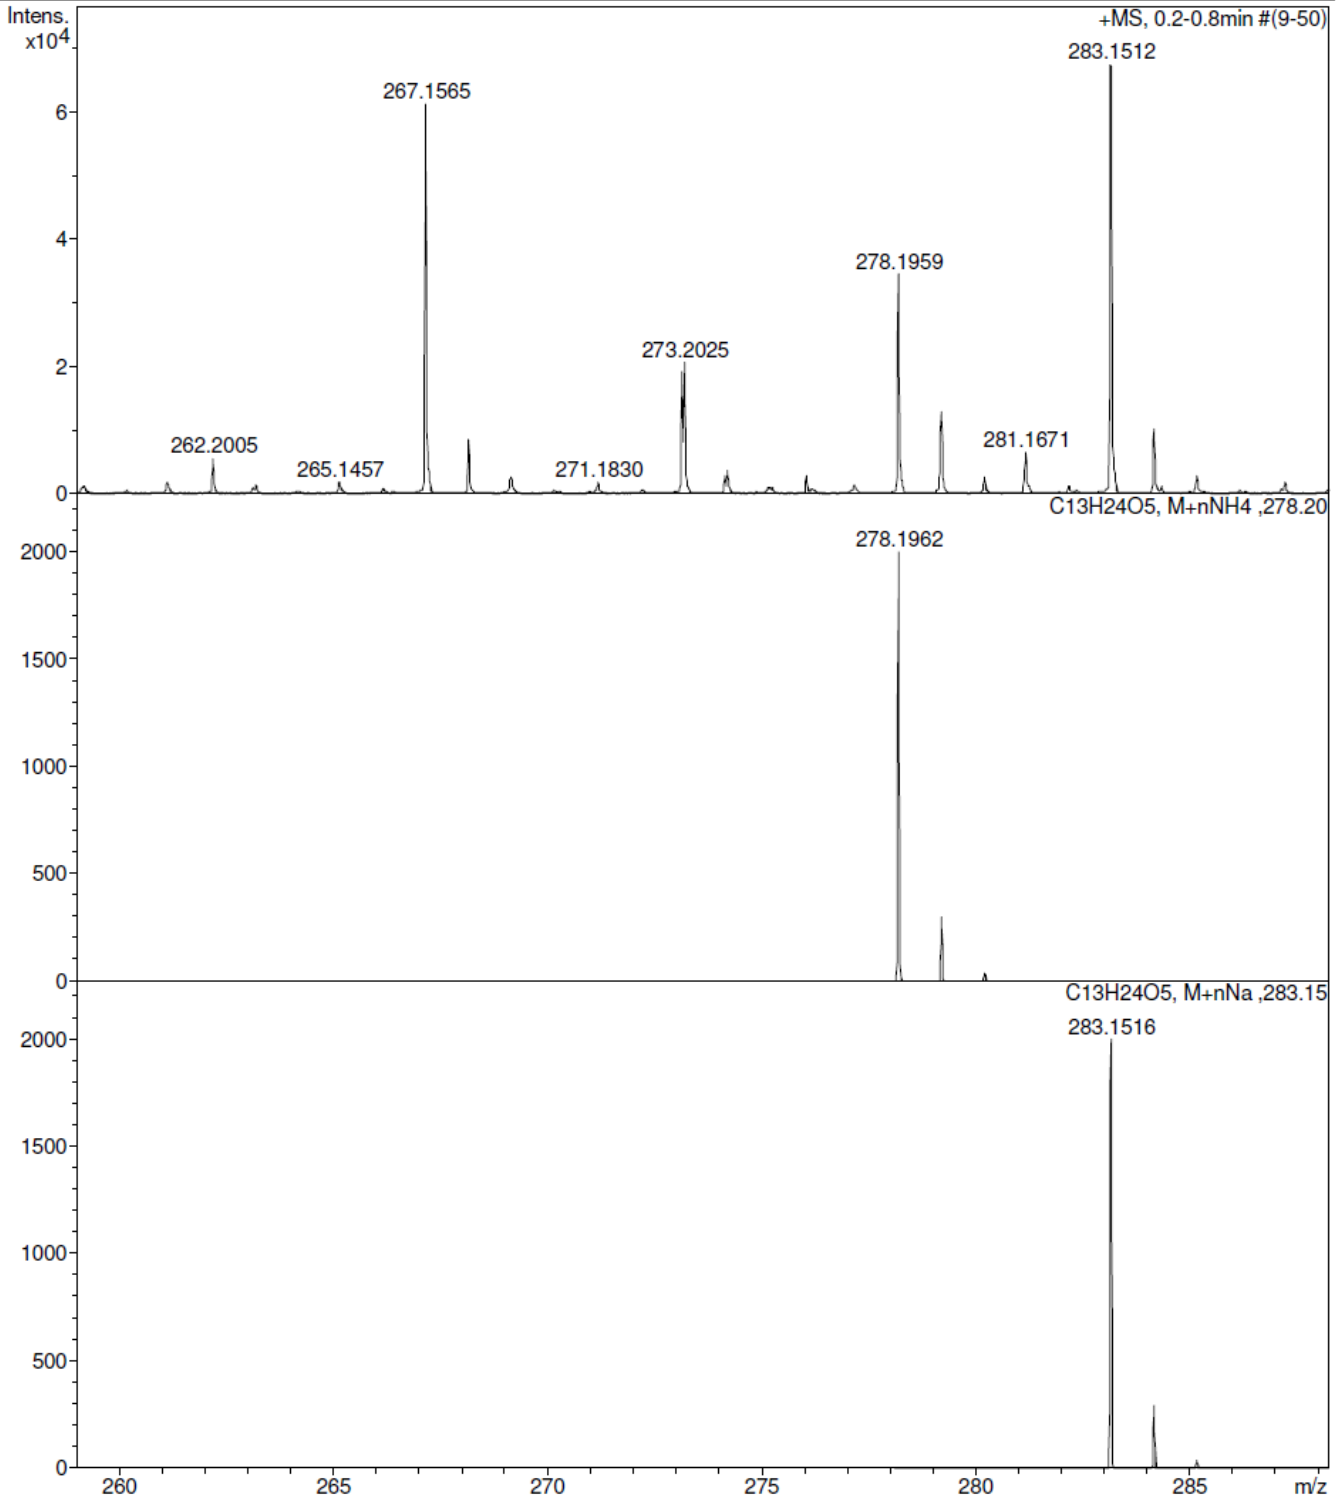

# 6-Hydroperoxy-6-methyl-1,2-dioxan-3-one, 2m

## Display Report

### Analysis Info

Analysis Name D:\Data\Kolotyrkina\2017\Vi\0912020.d  
Method tune\_low.m  
Sample Name /TERN ME-14  
Comment C5H8O5 mH 149.0444 clb added

Acquisition Date 12.09.2017 14:56:25  
Operator BDAL@DE  
Instrument / Ser# micrOTOF 10248

### Acquisition Parameter

|             |            |                      |          |                  |           |
|-------------|------------|----------------------|----------|------------------|-----------|
| Source Type | ESI        | Ion Polarity         | Positive | Set Nebulizer    | 0.4 Bar   |
| Focus       | Not active |                      |          | Set Dry Heater   | 180 °C    |
| Scan Begin  | 50 m/z     | Set Capillary        | 4500 V   | Set Dry Gas      | 4.0 l/min |
| Scan End    | 3000 m/z   | Set End Plate Offset | -500 V   | Set Divert Valve | Waste     |

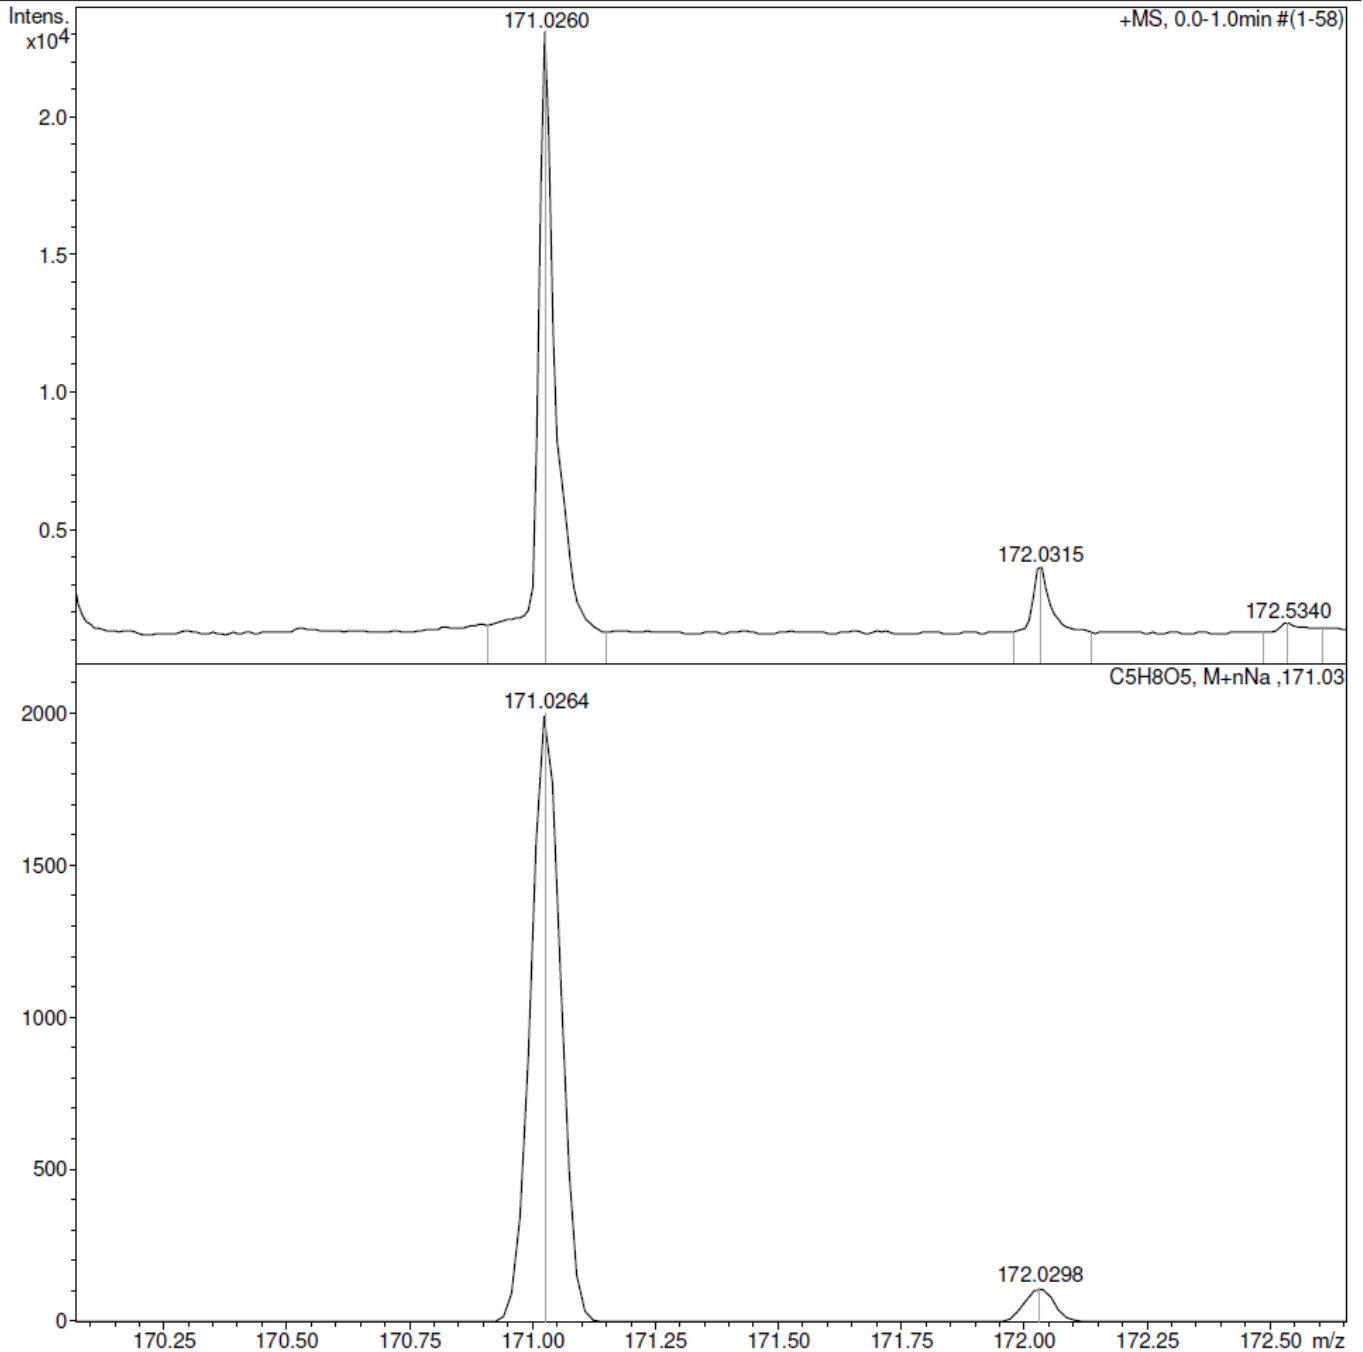

# 6-Hydroperoxy-4,6-dimethyl-1,2-dioxan-3-one, 2n

## Display Report

### Analysis Info

Analysis Name D:\Data\Kolotyrkina\2019\Barsegyan\0912023.d  
Method tune\_50-1600.m  
Sample Name /TERN Brs284  
Comment C6H10O5 mH 163.0601 calibrant added

Acquisition Date 12.09.2019 15:15:40  
Operator BDAL@DE  
Instrument / Ser# microTOF 10248

### Acquisition Parameter

|             |            |                      |          |                  |           |
|-------------|------------|----------------------|----------|------------------|-----------|
| Source Type | ESI        | Ion Polarity         | Positive | Set Nebulizer    | 1.0 Bar   |
| Focus       | Not active |                      |          | Set Dry Heater   | 200 °C    |
| Scan Begin  | 50 m/z     | Set Capillary        | 4500 V   | Set Dry Gas      | 4.0 l/min |
| Scan End    | 1600 m/z   | Set End Plate Offset | -500 V   | Set Divert Valve | Waste     |

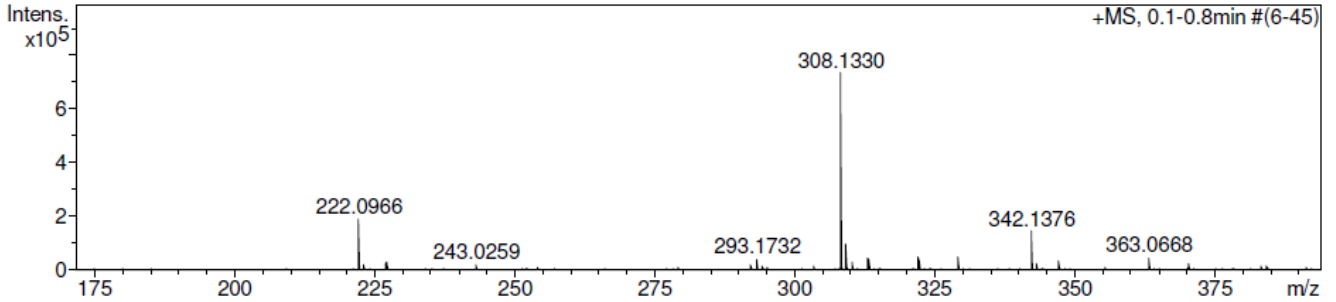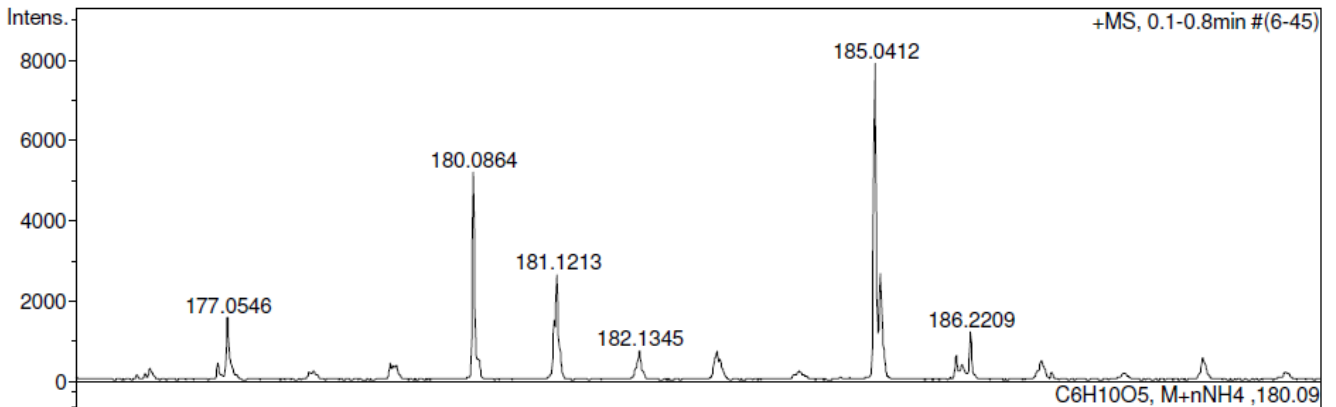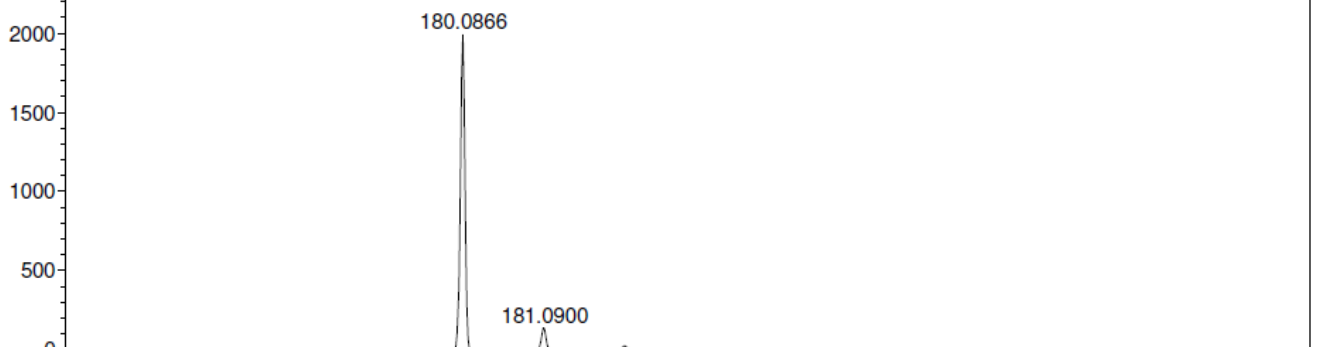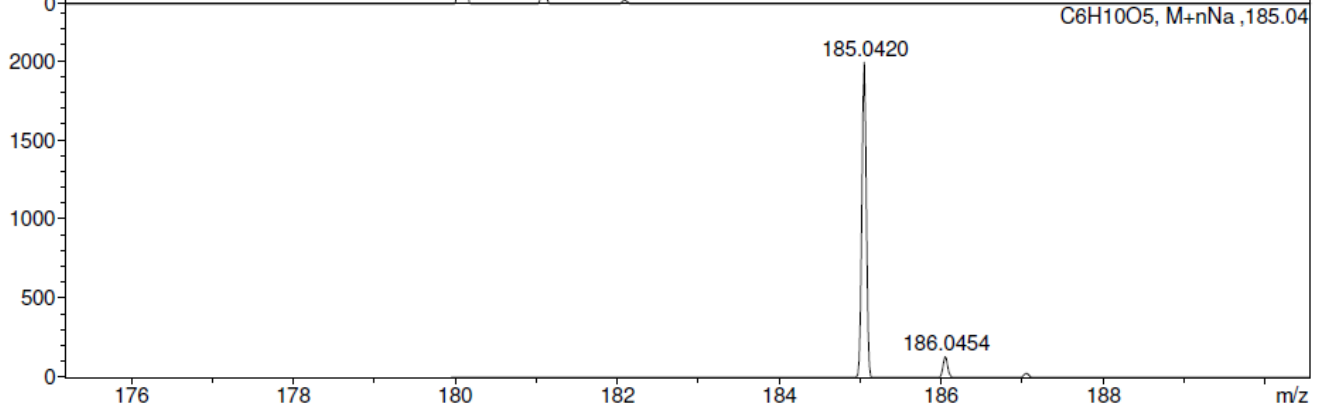

6-Butyl-6-hydroperoxy-1,2-dioxan-3-one, 2o

Display Report

Analysis Info

Analysis Name D:\Data\Kolotyorkina\2019\VII\1119020.d  
Method tune\_50-1600.m  
Sample Name /TERN BB2139  
Comment C8H14O5 mH 191.0924 calibrant added

Acquisition Date 19.11.2019 15:52:42

Operator BDAL@DE  
Instrument / Ser# micrOTOF 10248

Acquisition Parameter

|             |            |                      |          |                  |           |
|-------------|------------|----------------------|----------|------------------|-----------|
| Source Type | ESI        | Ion Polarity         | Positive | Set Nebulizer    | 1.0 Bar   |
| Focus       | Not active |                      |          | Set Dry Heater   | 200 °C    |
| Scan Begin  | 50 m/z     | Set Capillary        | 4500 V   | Set Dry Gas      | 4.0 l/min |
| Scan End    | 1600 m/z   | Set End Plate Offset | -500 V   | Set Divert Valve | Waste     |

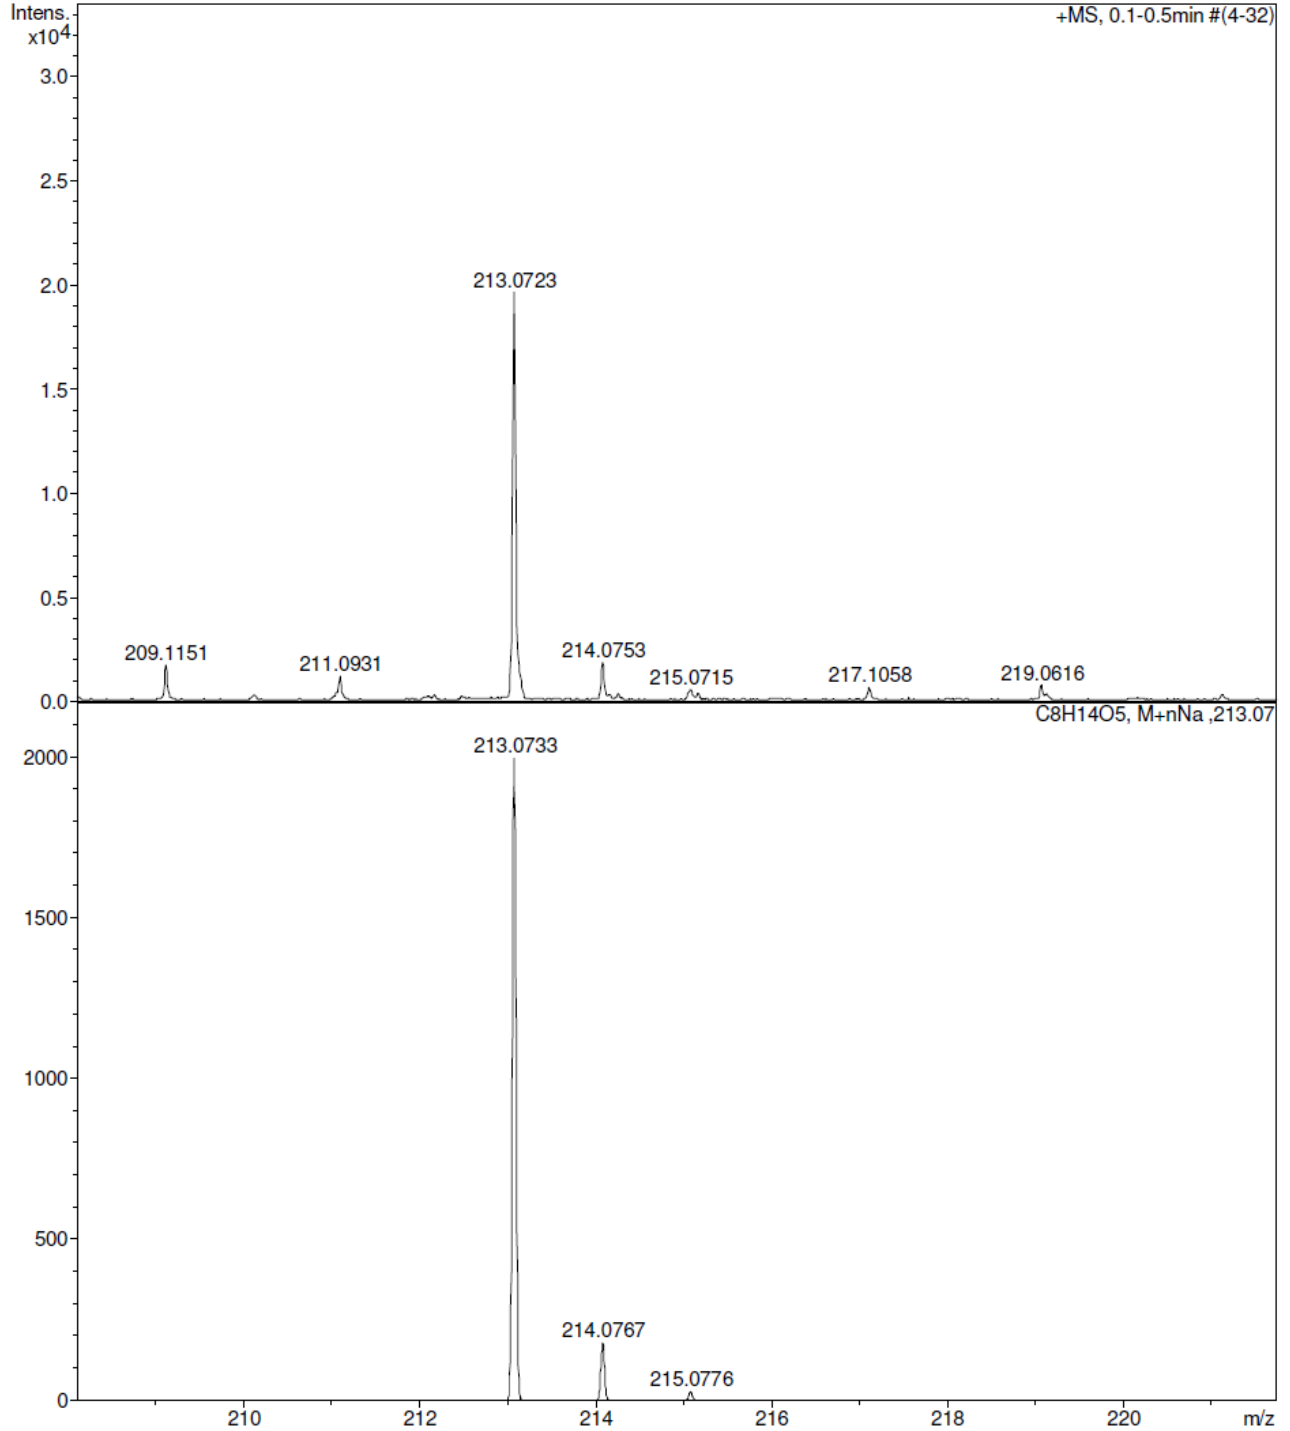

# Display Report

**Analysis Info**

Analysis Name D:\Data\Kolotyarkina\2019\Vi\1009027.d  
 Method tune\_50-1600.m  
 Sample Name /TERN BB-2184  
 Comment C12H14O4 mH 223.0964 calibrant added

Acquisition Date 09.10.2019 18:15:54  
 Operator BDAL@DE  
 Instrument / Ser# micrOTOF 10248

**Acquisition Parameter**

|             |            |                      |          |                  |           |
|-------------|------------|----------------------|----------|------------------|-----------|
| Source Type | ESI        | Ion Polarity         | Positive | Set Nebulizer    | 1.0 Bar   |
| Focus       | Not active |                      |          | Set Dry Heater   | 200 °C    |
| Scan Begin  | 50 m/z     | Set Capillary        | 4500 V   | Set Dry Gas      | 4.0 l/min |
| Scan End    | 1600 m/z   | Set End Plate Offset | -500 V   | Set Divert Valve | Waste     |

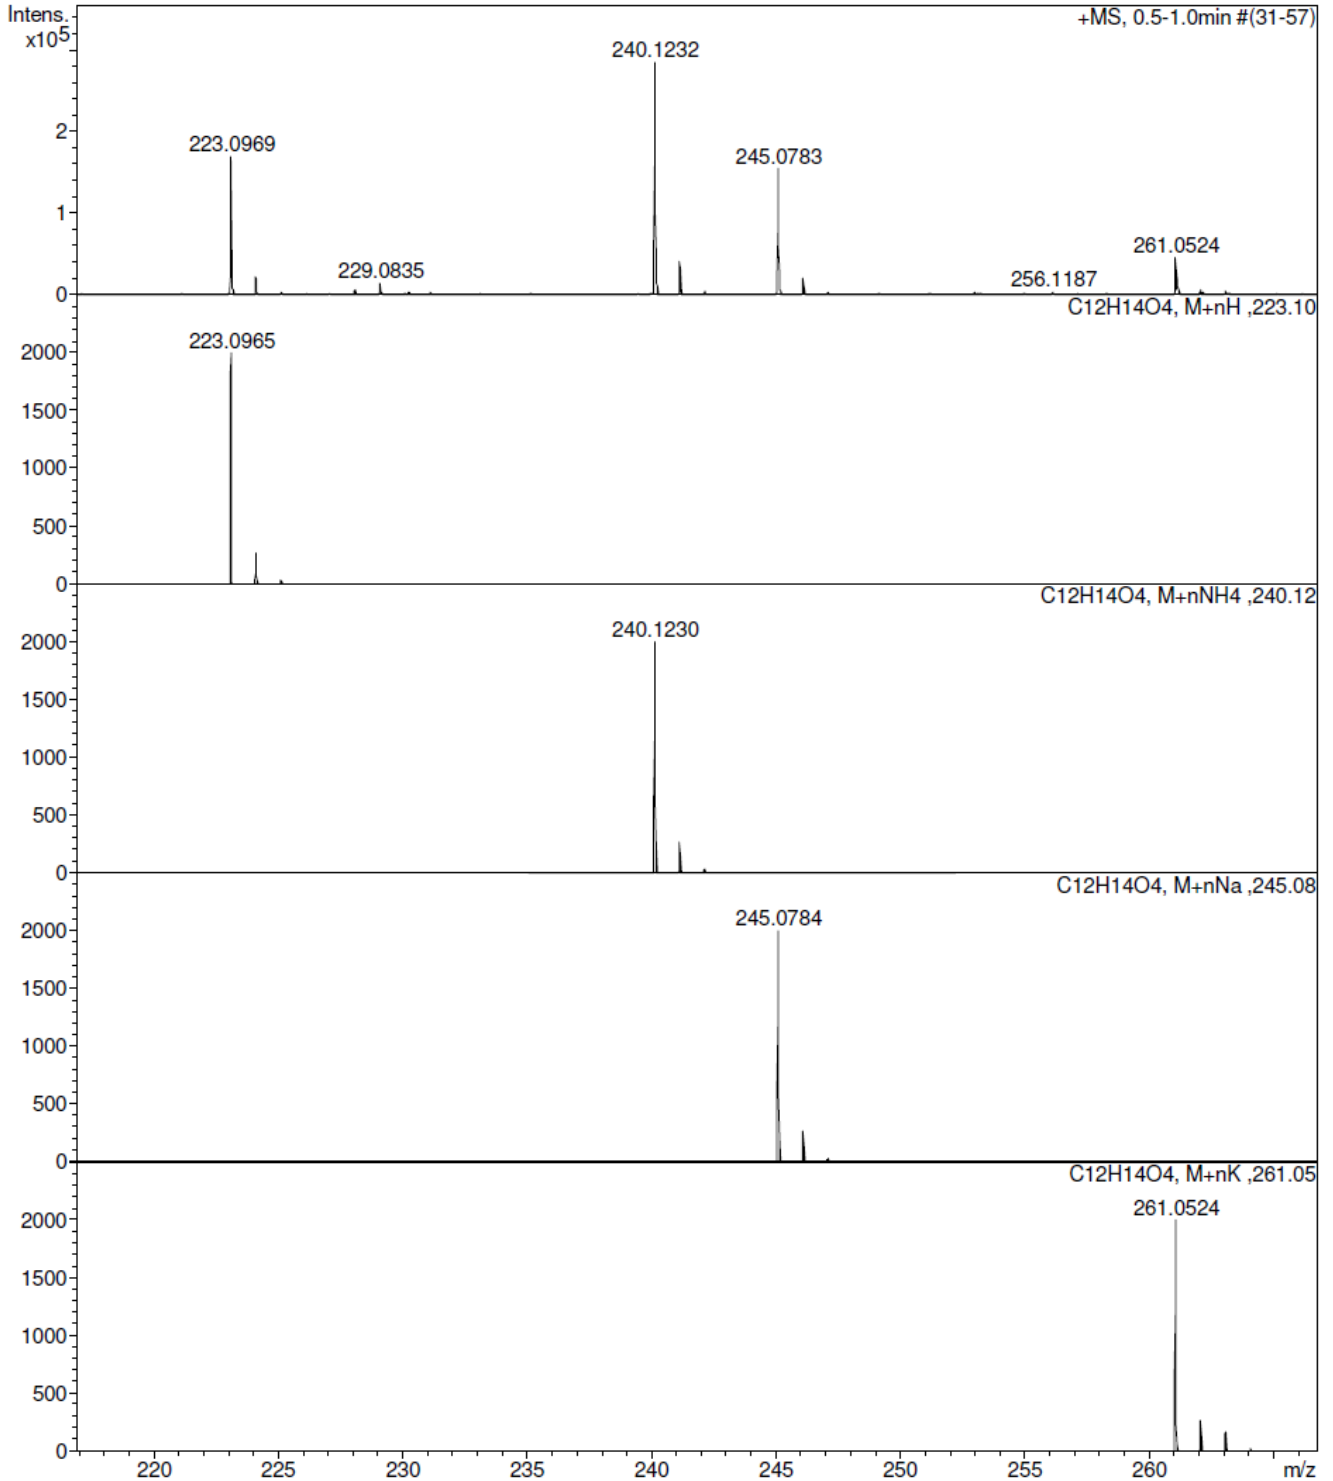



IR spectra of  $\gamma$ -hydroperoxy- $\gamma$ -peroxylactones 2 and other products  
5-Benzyl-6-hydroperoxy-6-methyl-1,2-dioxan-3-one, 2a

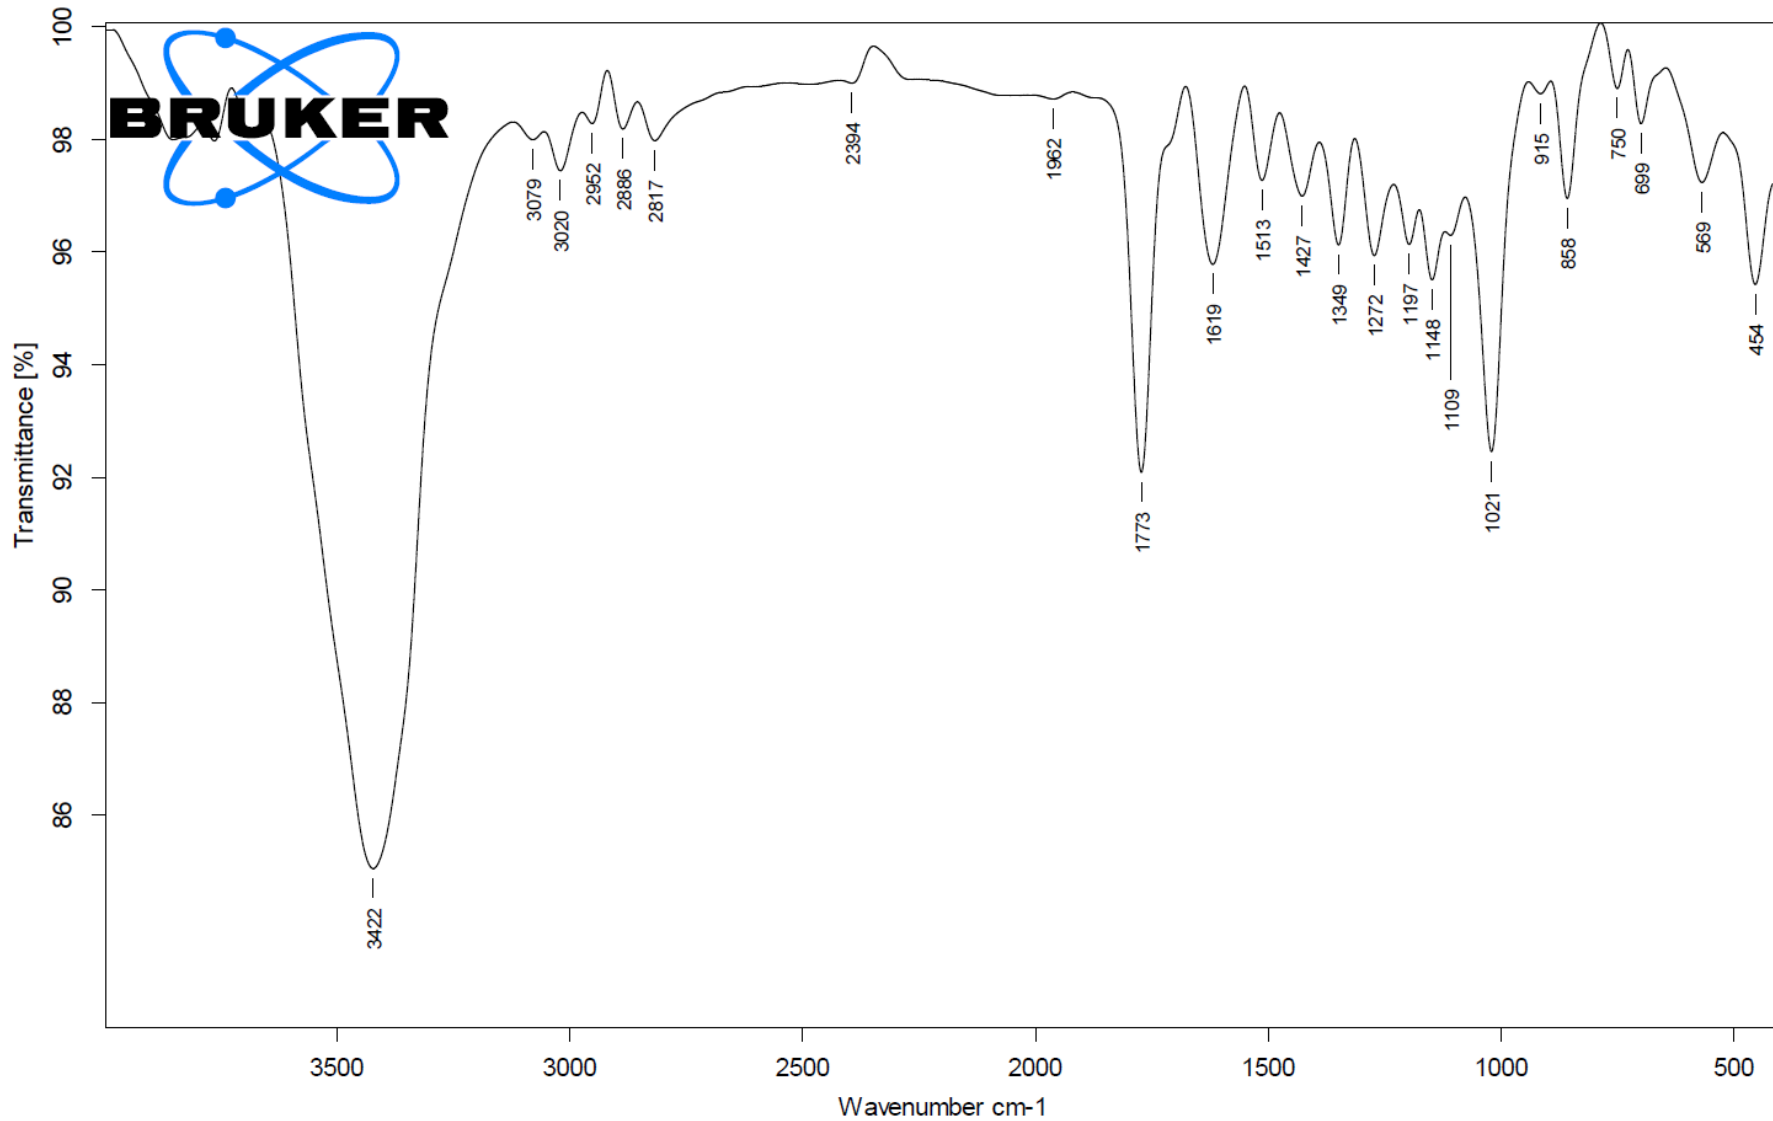

D:\Irb\Виль ВВ-2137.0

Виль ВВ-2137

КВr прессовка

18.10.2019

# 6-Hydroperoxy-6-methyl-5-(4-nitrobenzyl)-1,2-dioxan-3-one, 2b

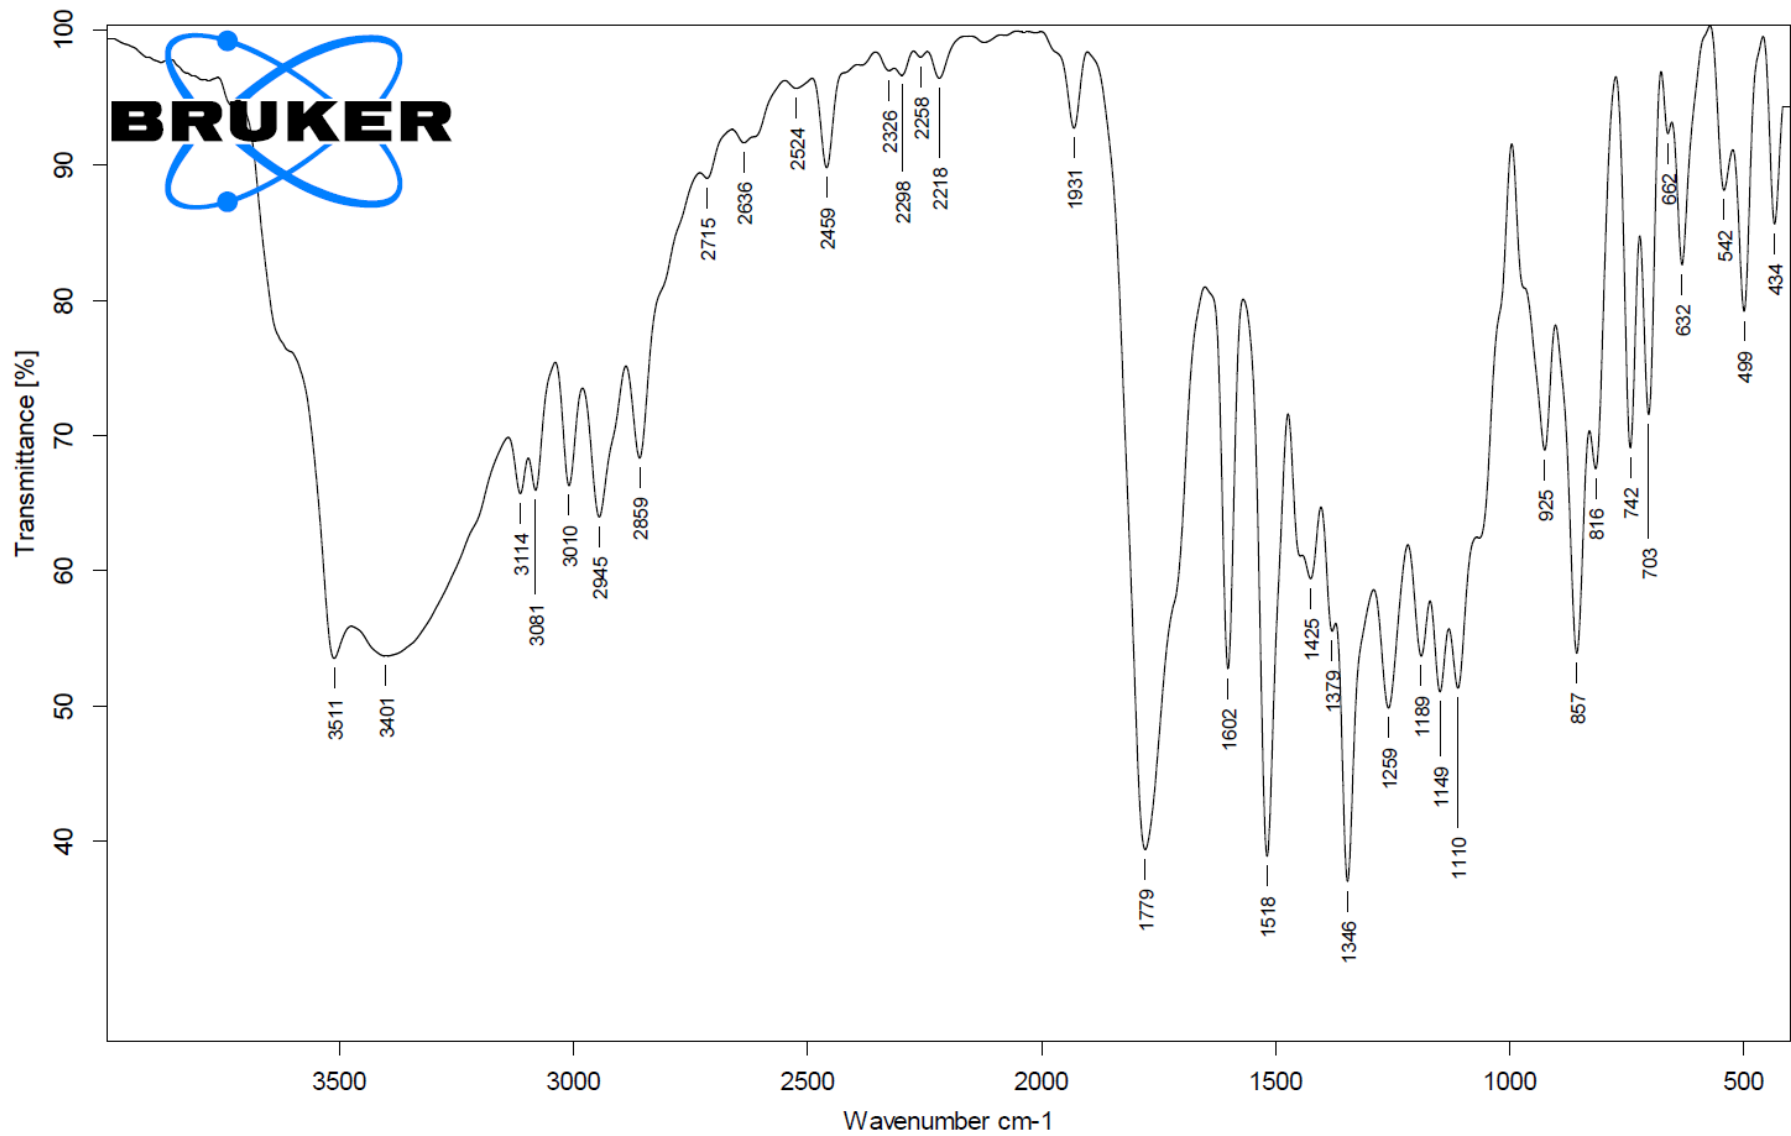

D:\Irf\Виль ВВ2150.0    Виль ВВ2150    КВг тонкий слой

18.10.2019

5-(4-Chlorobenzyl)-6-hydroperoxy-6-methyl-1,2-dioxan-3-one, 2c

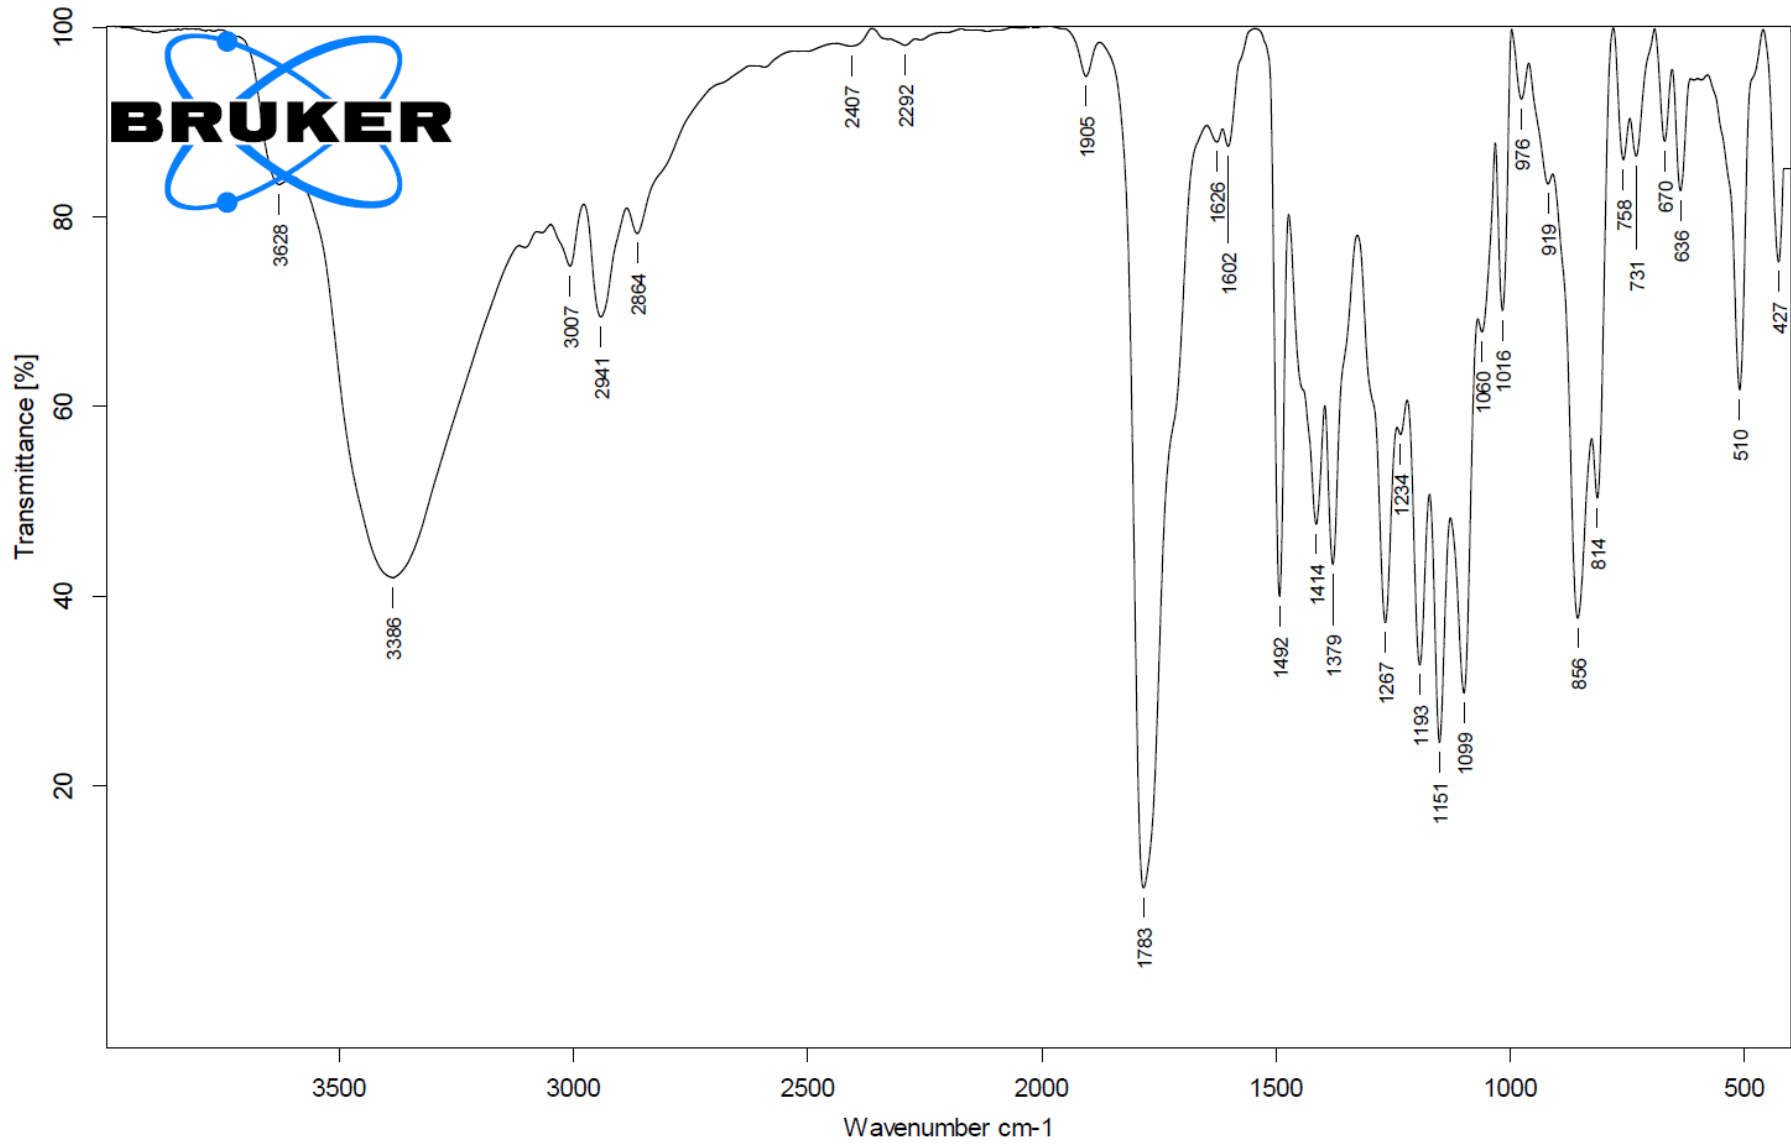

D:\IrB\Виль ВВ2153.0 Виль ВВ2153 КВг тонкий слой

18.10.2019

5-(4-Bromobenzyl)-6-hydroperoxy-6-methyl-1,2-dioxan-3-one, 2d

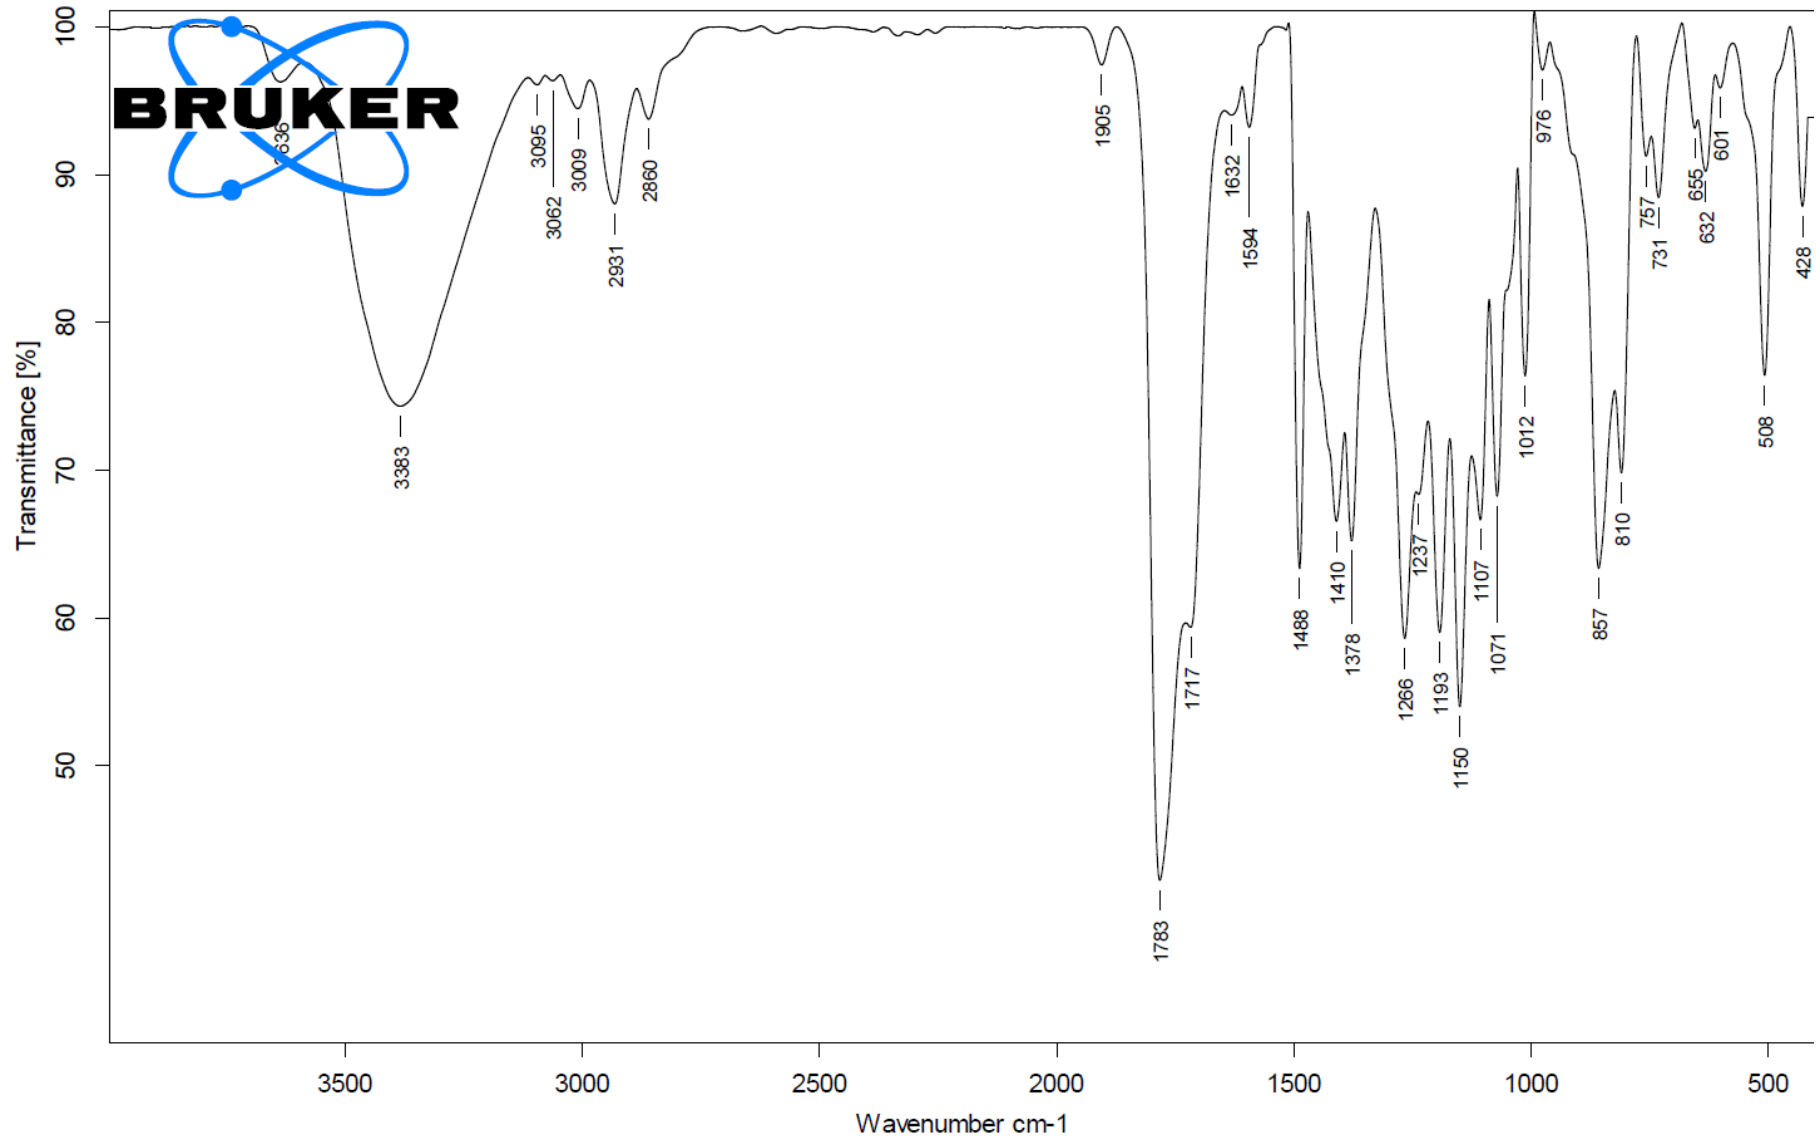

D:\I\B\Барсегян Brs362.0

Барсегян Brs362

KBr тонкий слой

11.12.2019

5-(4-(Tert-butyl)benzyl)-6-hydroperoxy-6-methyl-1,2-dioxan-3-one, 2e

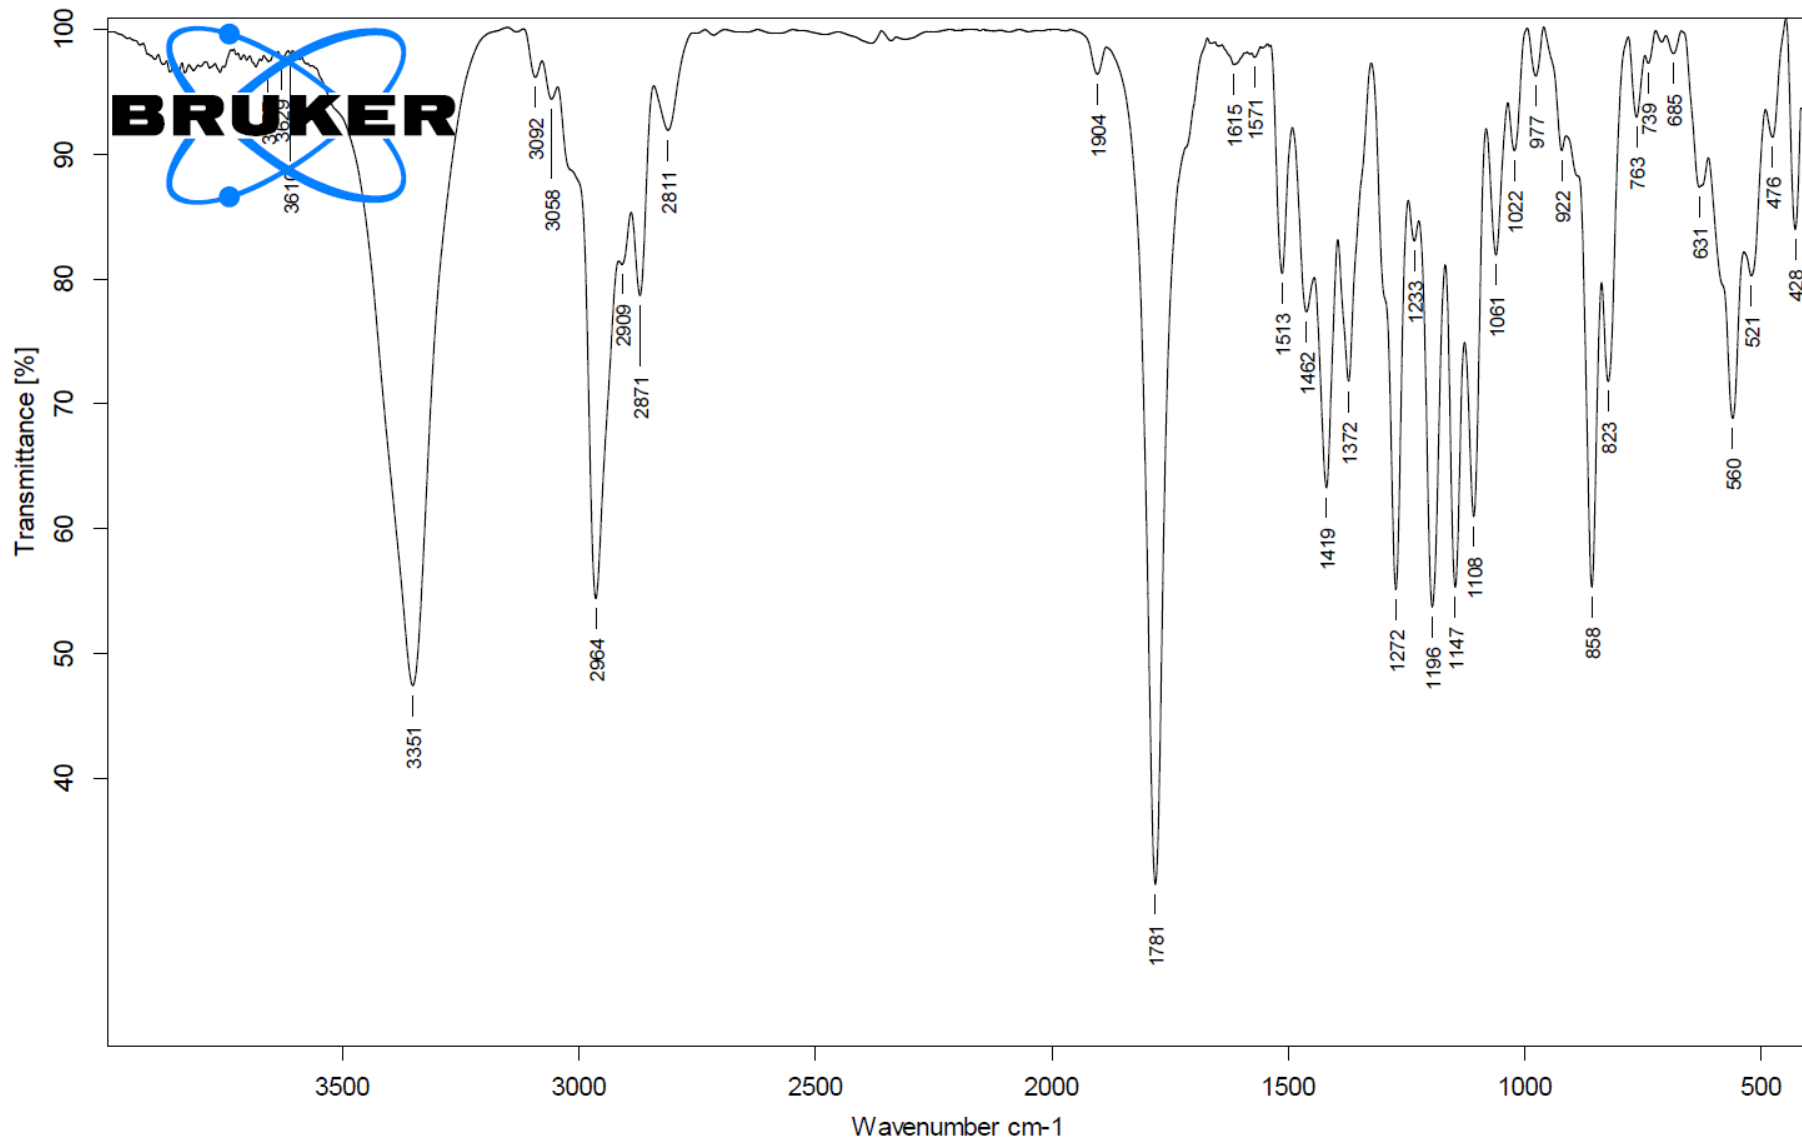

|                         |                 |               |            |
|-------------------------|-----------------|---------------|------------|
| D:\ГВ\Барсегян ВВ2155.0 | Барсегян ВВ2155 | КВг прессовка | 11.12.2019 |
|-------------------------|-----------------|---------------|------------|

6-Hydroperoxy-6-methyl-5-(4-methylbenzyl)-1,2-dioxan-3-one, 2f

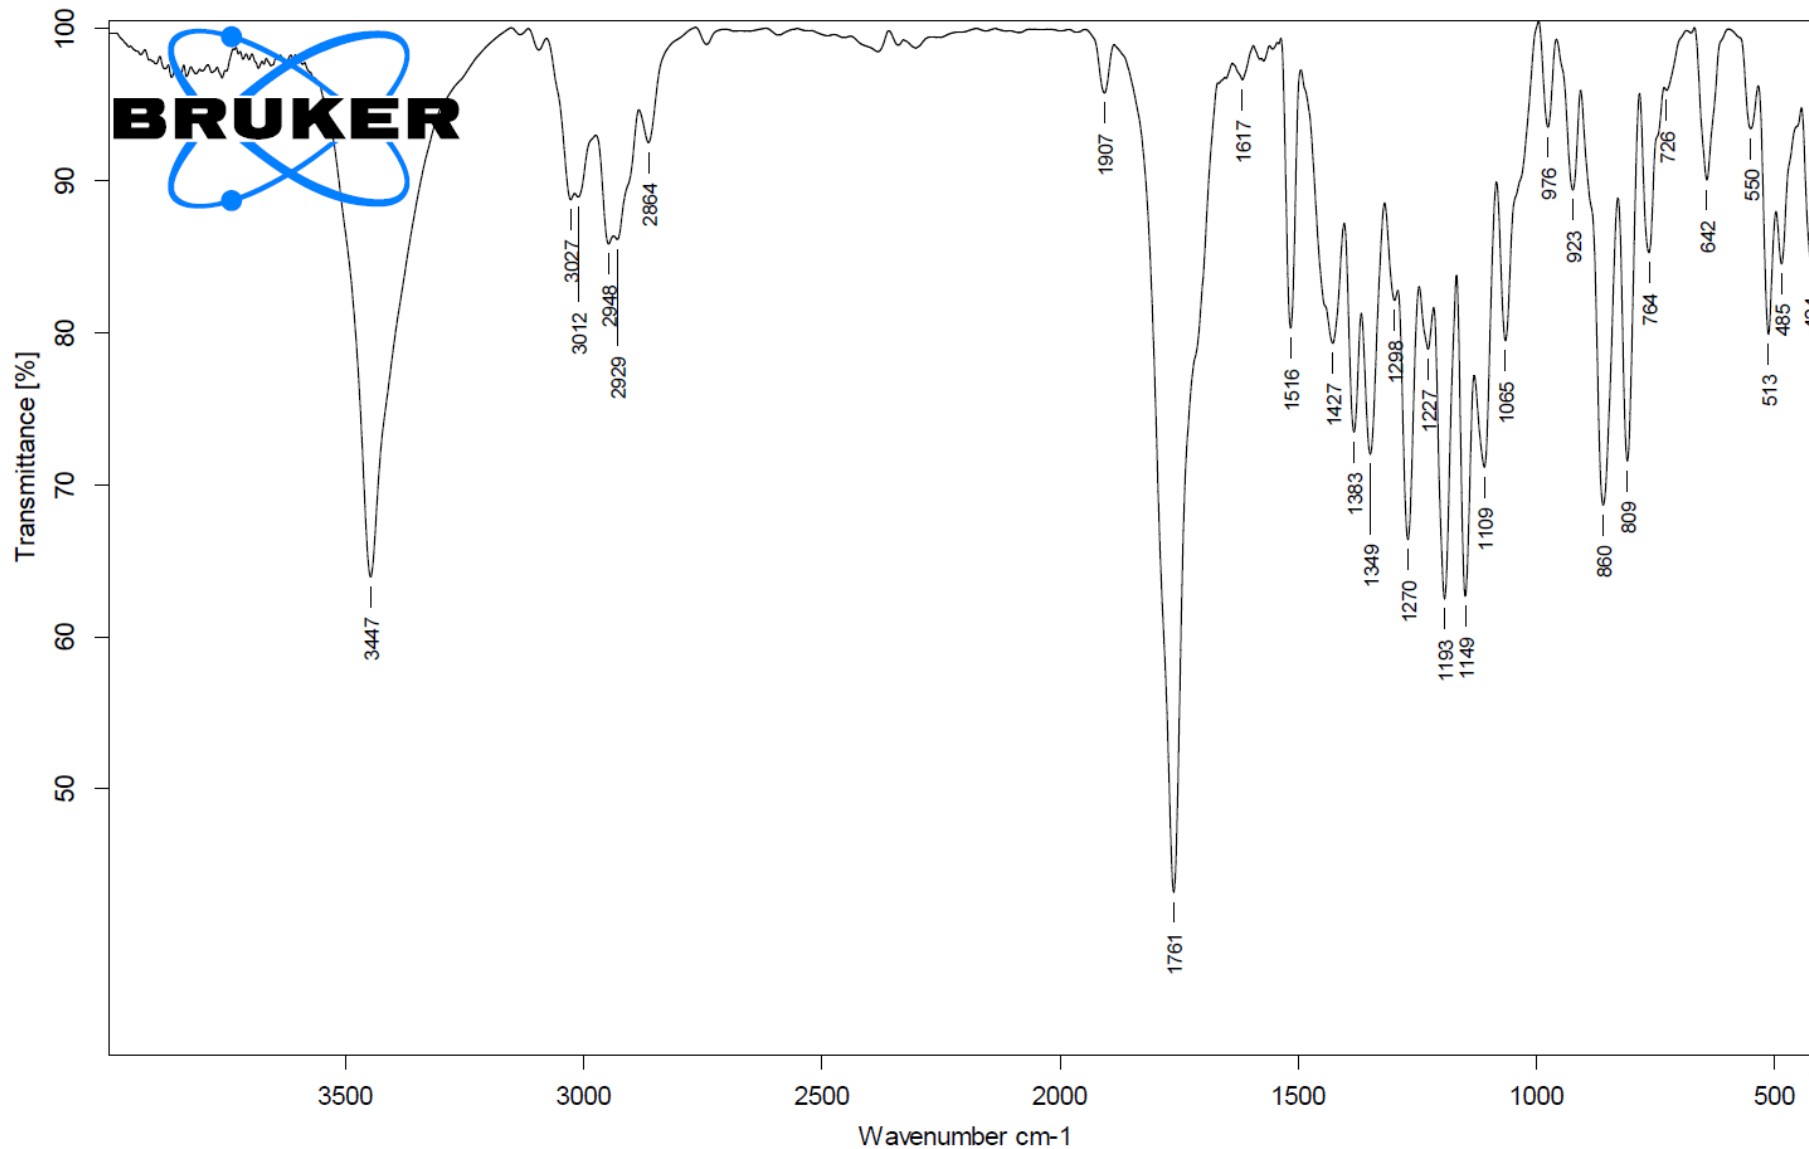

|                         |                |               |            |
|-------------------------|----------------|---------------|------------|
| D:\IrB\Барсеян Brs391.1 | Барсеян Brs391 | КВr прессовка | 11.12.2019 |
|-------------------------|----------------|---------------|------------|

6-Hydroperoxy-6-methyl-5-(3-methylbenzyl)-1,2-dioxan-3-one, 2g

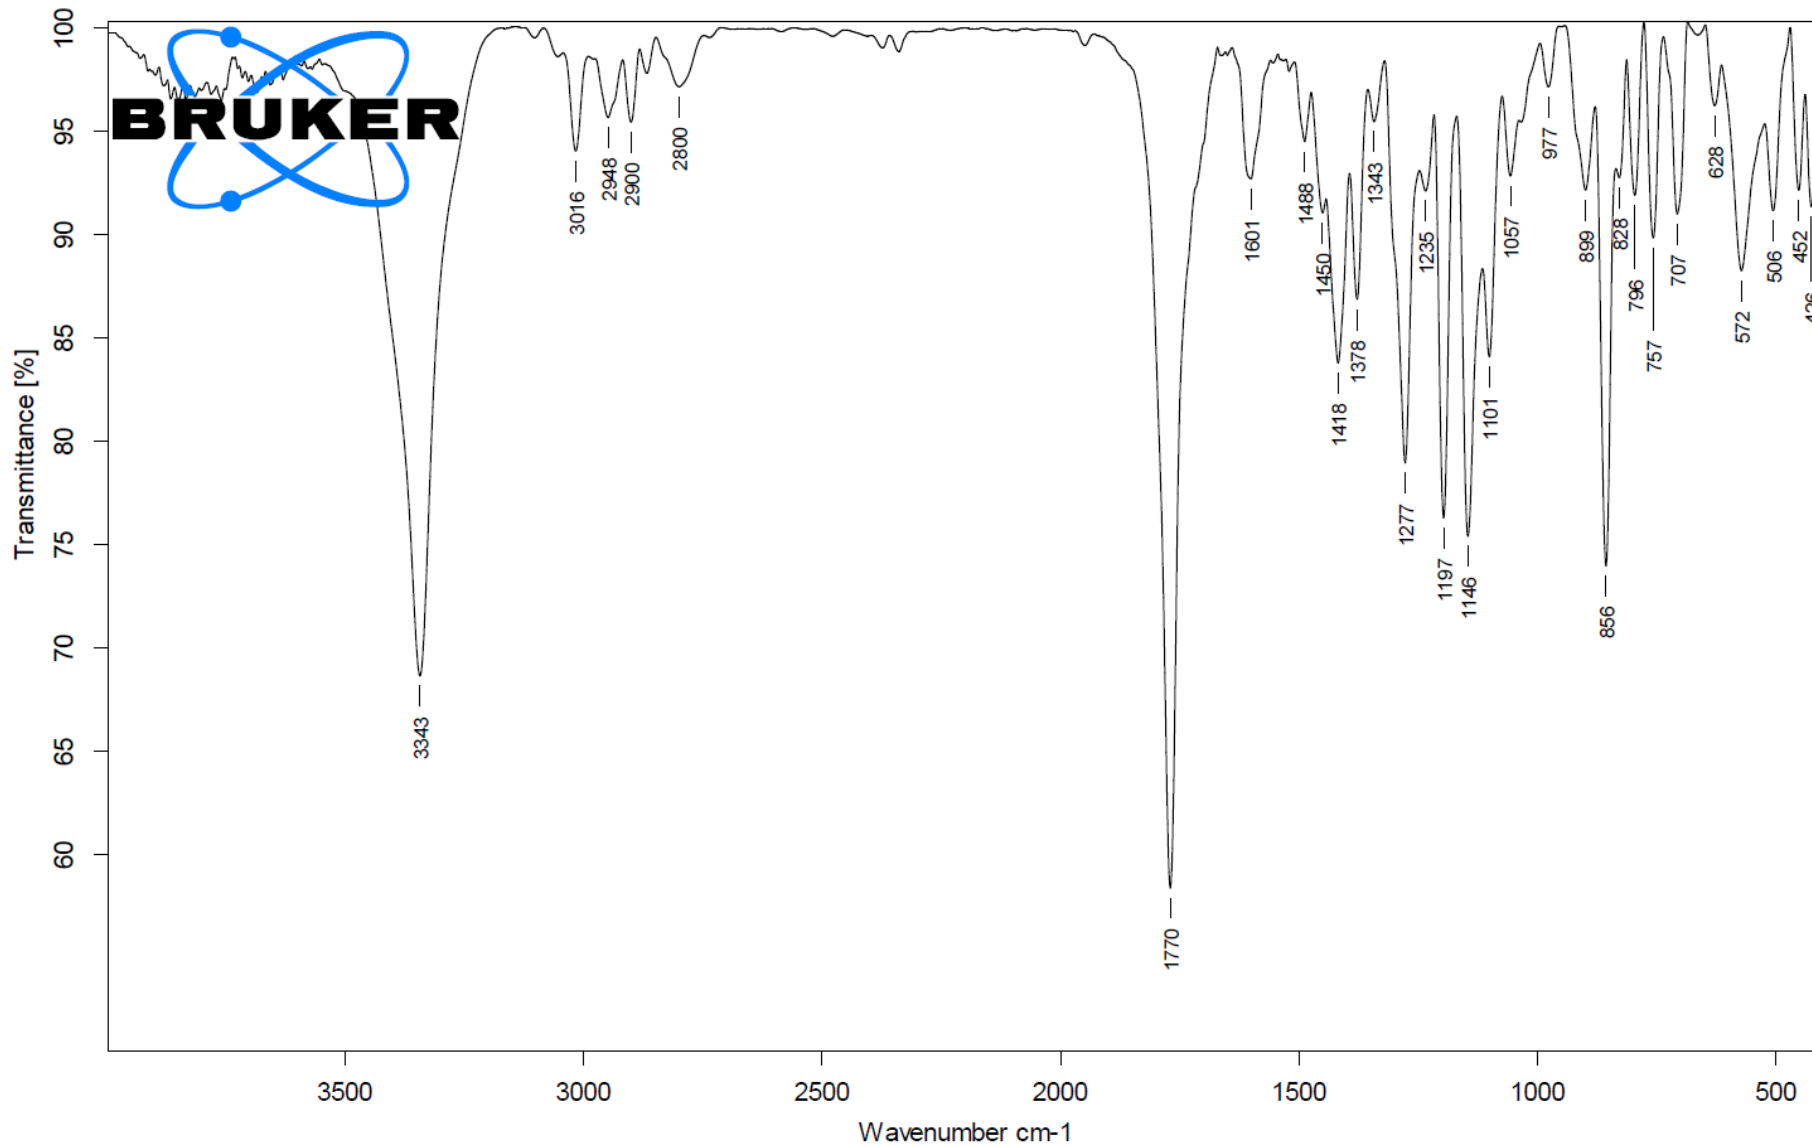

|                        |               |               |            |
|------------------------|---------------|---------------|------------|
| D:\IrB\Барсеян SE-30.0 | Барсеян SE-30 | КВг прессовка | 11.12.2019 |
|------------------------|---------------|---------------|------------|

# 6-Hydroperoxy-5-(3-methoxybenzyl)-6-methyl-1,2-dioxan-3-one, 2h

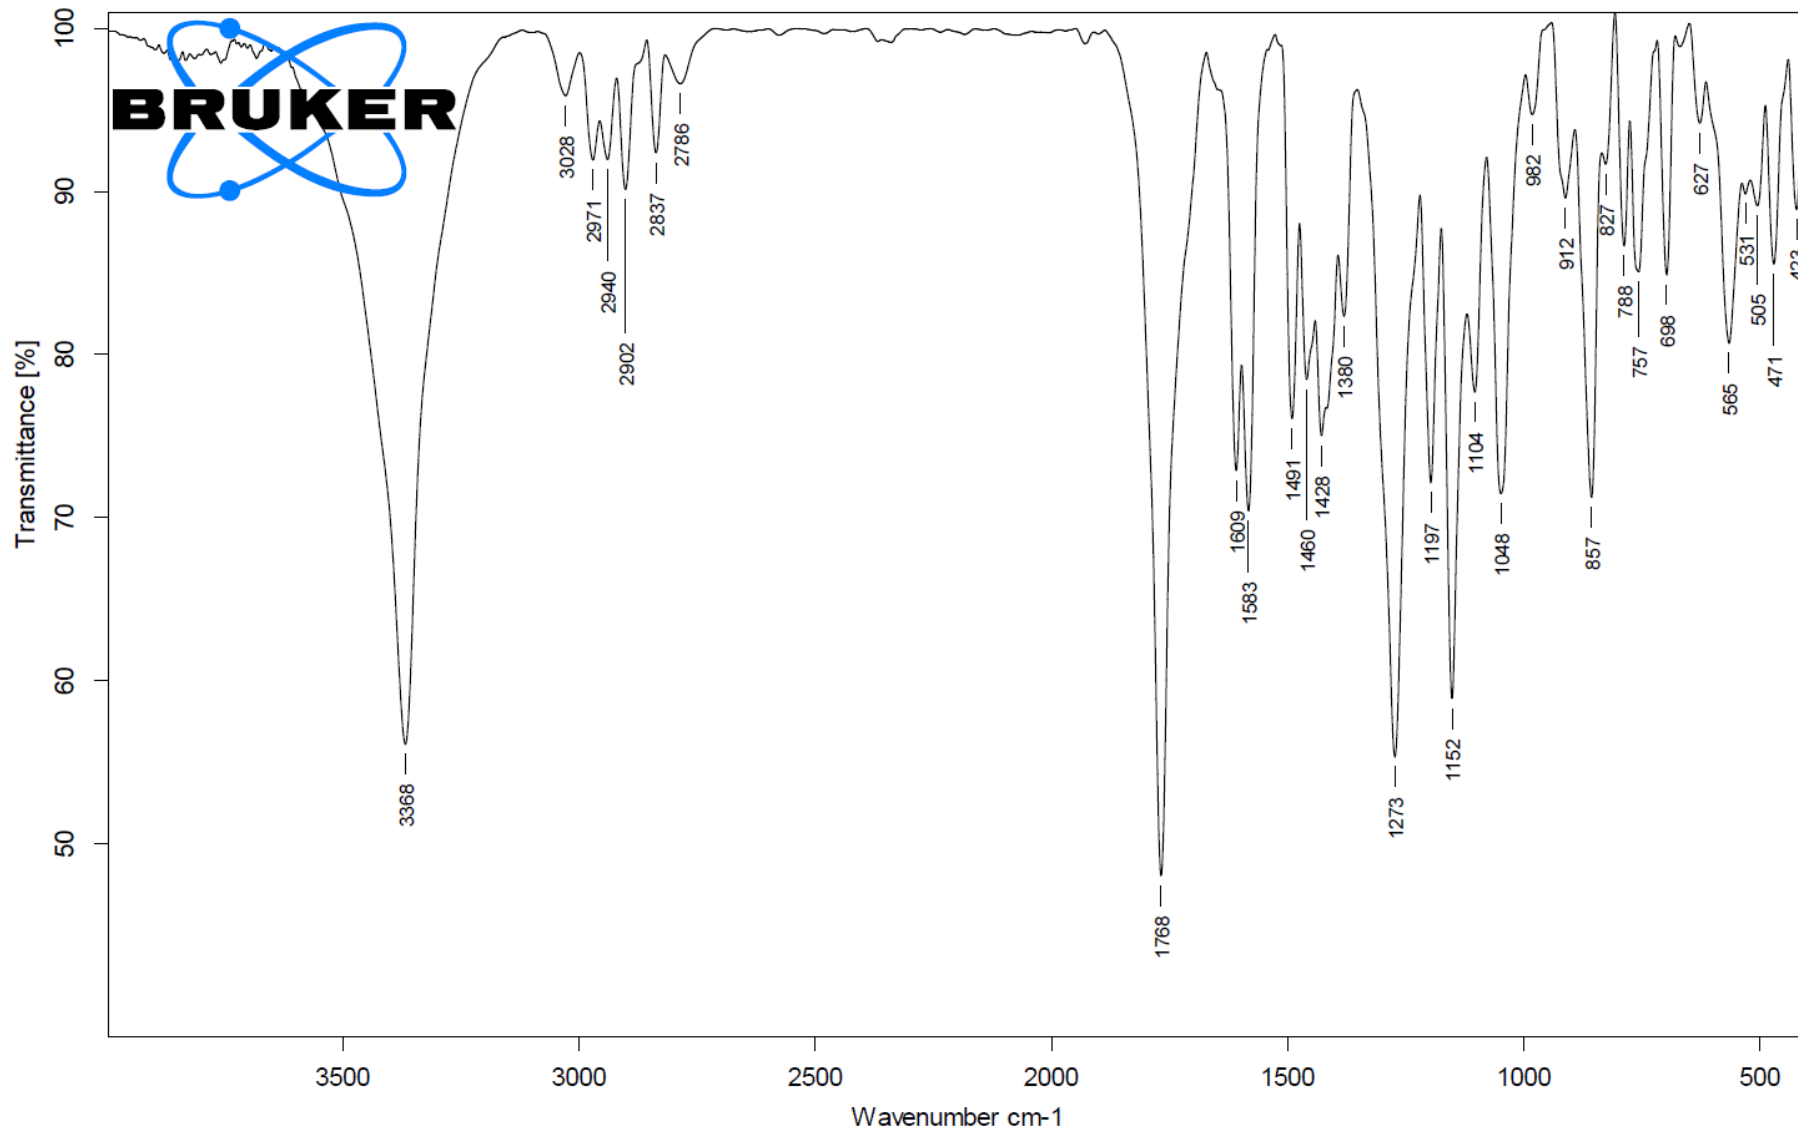

D:\IrV\Барсеян Brs371.0

Барсеян Brs371

KBr прессовка

20.11.2019



5-(2-Chlorobenzyl)-6-hydroperoxy-6-methyl-1,2-dioxan-3-one, 2i

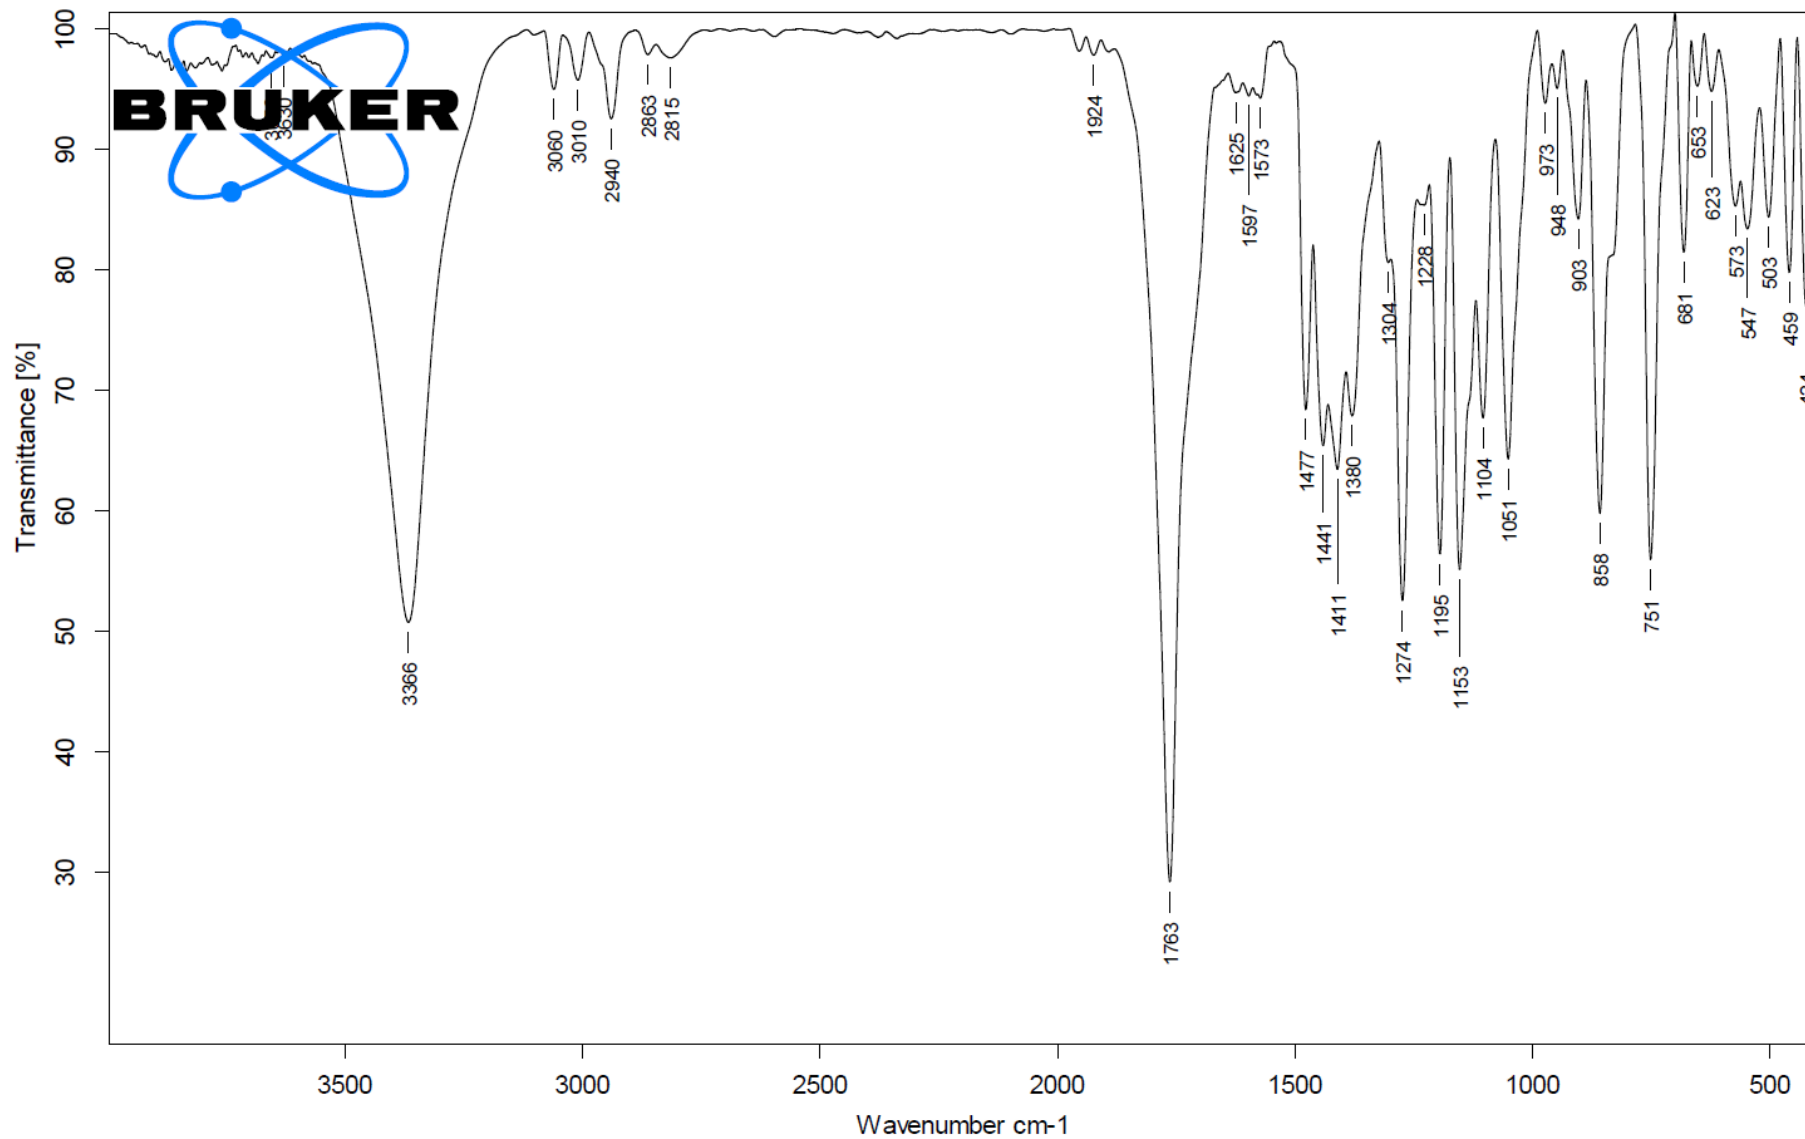

|                        |                |               |            |
|------------------------|----------------|---------------|------------|
| D:\ГВ\Барсеян Brs383.0 | Барсеян Brs383 | КВr прессовка | 11.12.2019 |
|------------------------|----------------|---------------|------------|

# 5-Butyl-6-hydroperoxy-6-methyl-1,2-dioxan-3-one, 2j

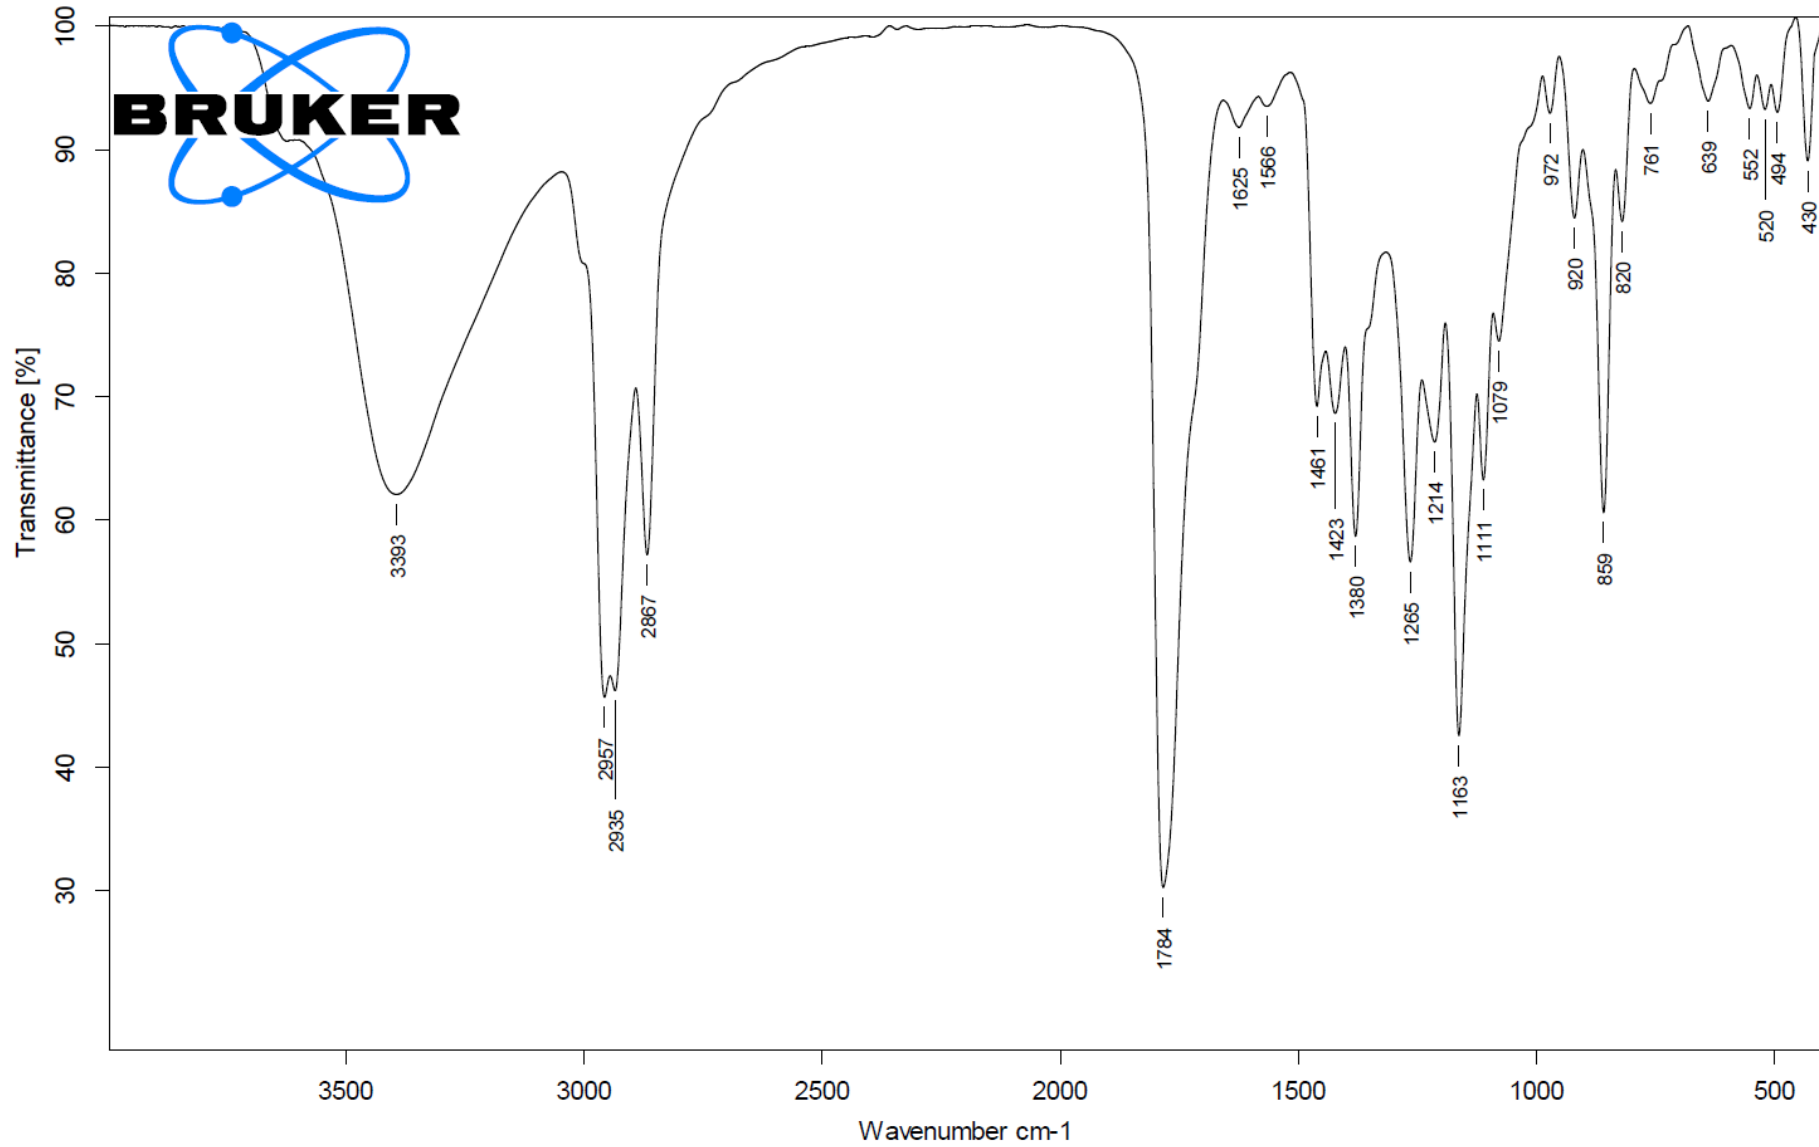

D:\Irb\Барсегян Brs328.0

Барсегян Brs328

КВг тонкий слой

16.10.2019

5-Hexyl-6-hydroperoxy-6-methyl-1,2-dioxan-3-one, 2k

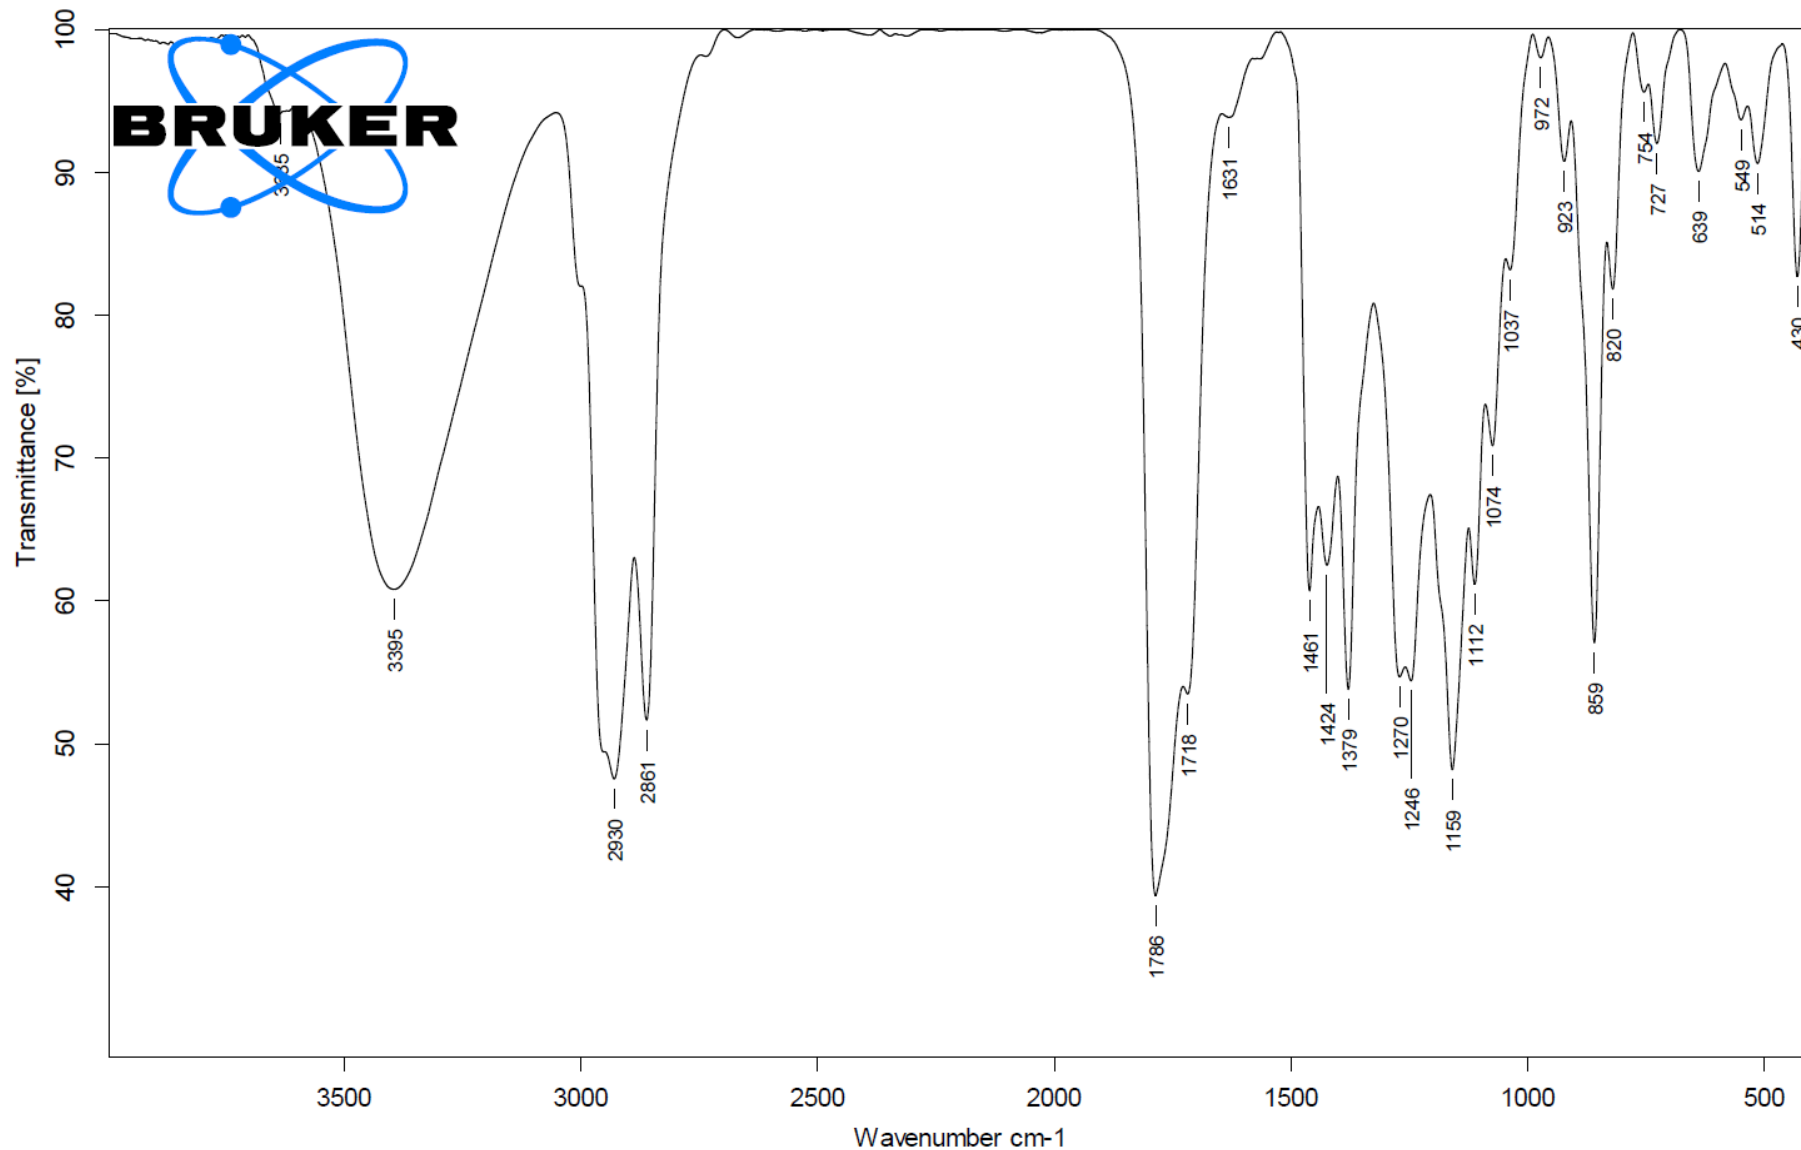

|                         |                 |                 |            |
|-------------------------|-----------------|-----------------|------------|
| D:\ИВ\Барсегян Brs361.0 | Барсегян Brs361 | КВг тонкий слой | 20.11.2019 |
|-------------------------|-----------------|-----------------|------------|

# 6-Hydroperoxy-6-methyl-5-octyl-1,2-dioxan-3-one, 2I

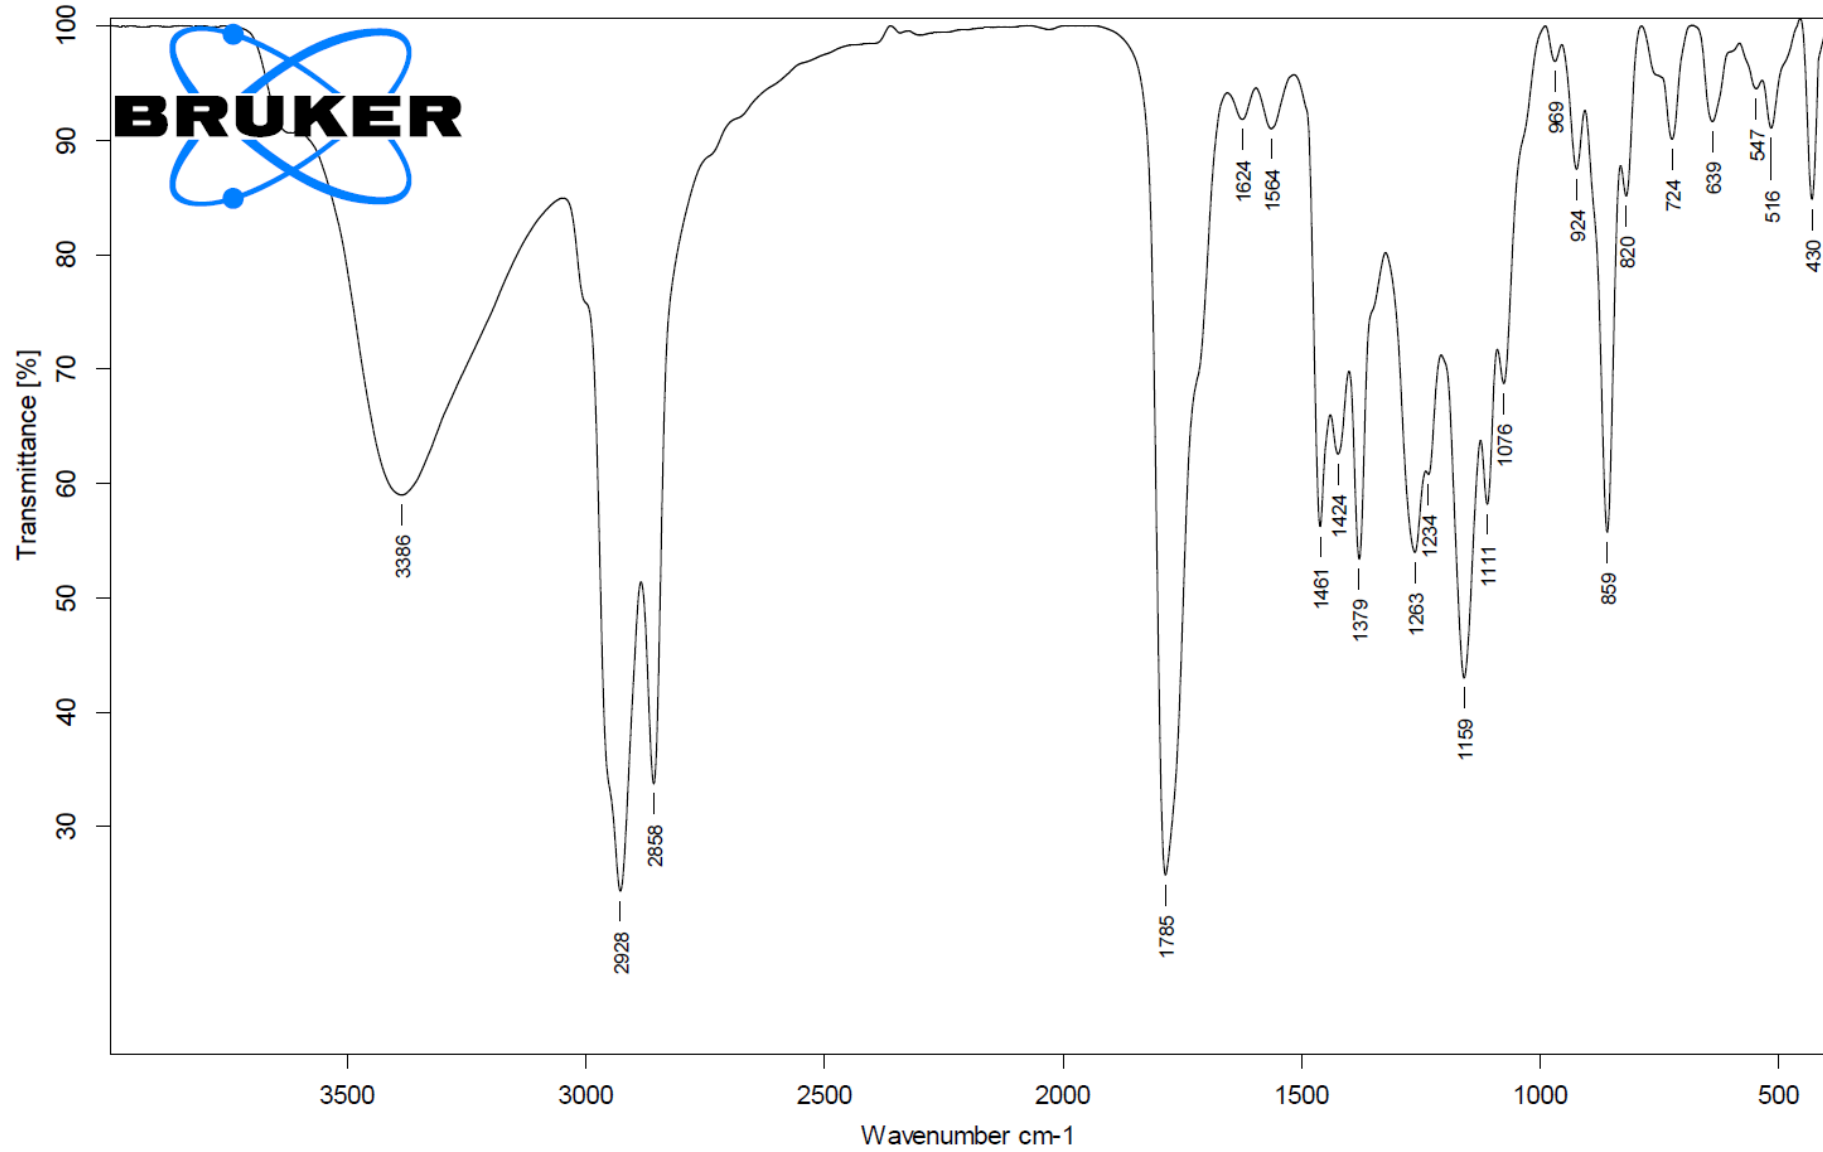

|                         |                |                 |            |
|-------------------------|----------------|-----------------|------------|
| D:\IrB\Барсеян Brs331.0 | Барсеян Brs331 | КВг тонкий слой | 16.10.2019 |
|-------------------------|----------------|-----------------|------------|

# 6-Hydroperoxy-6-methyl-1,2-dioxan-3-one, 2m

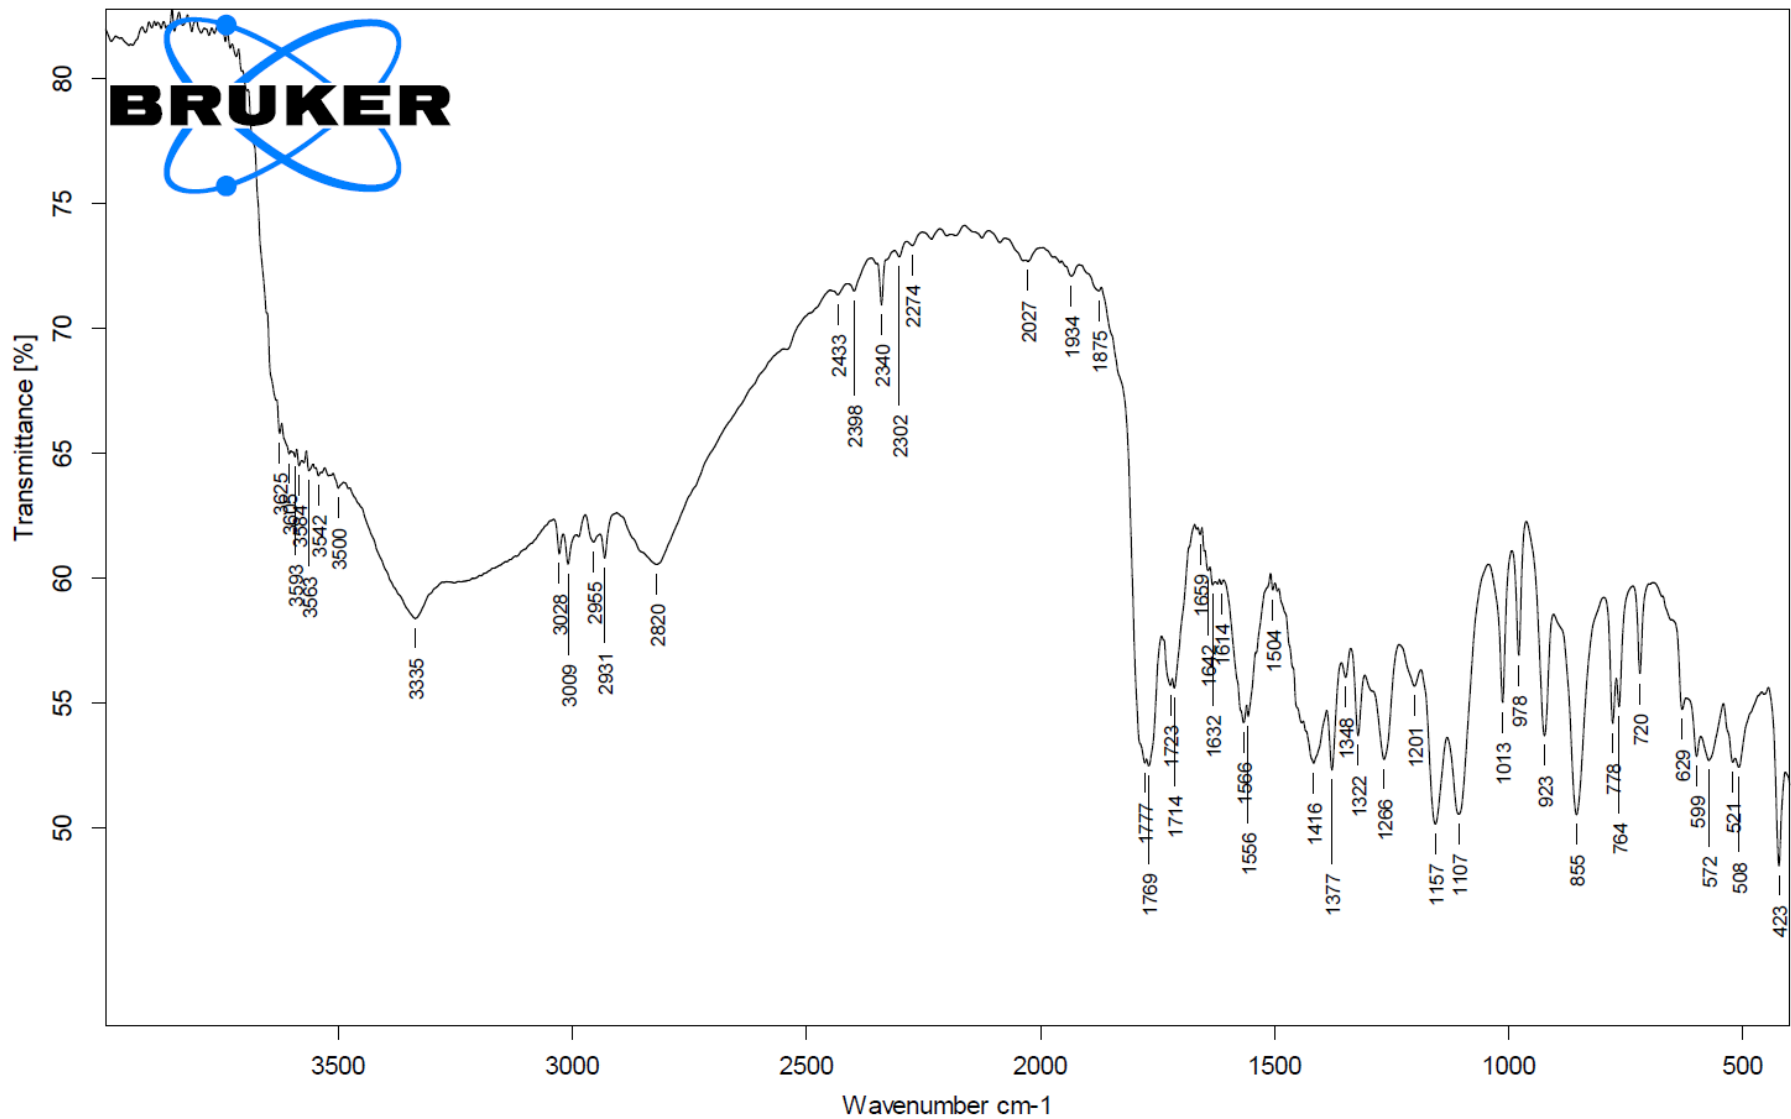

D:\rB\Виль ВВ 2133-1.0

Виль ВВ 2133-1

КВг тонкий слой

25.07.2019

# 6-Hydroperoxy-4,6-dimethyl-1,2-dioxan-3-one, 2n

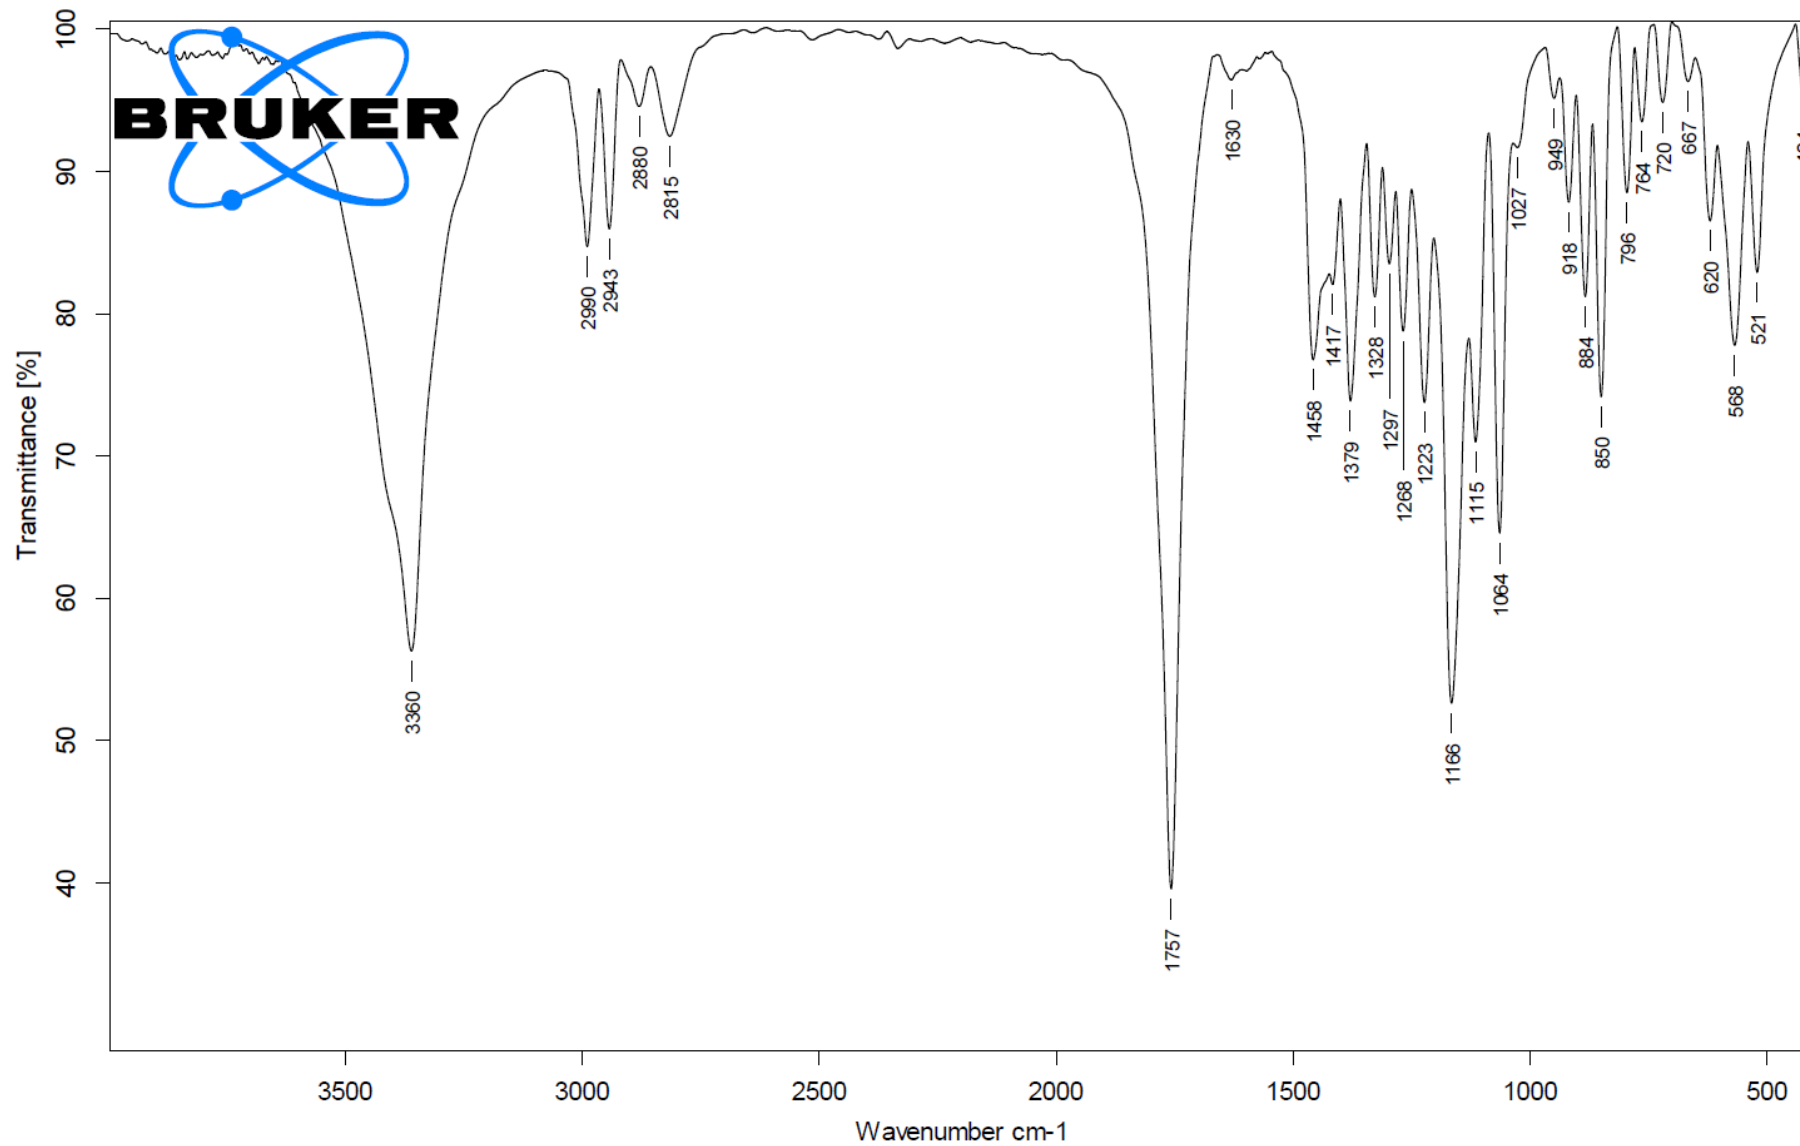

D:\IrB\Барсеян Brs284.0

Барсеян Brs284

КВr прессовка

25.10.2019

5-Benzyl-6-hydroxy-6-methyl-1,2-dioxan-3-one, 3a

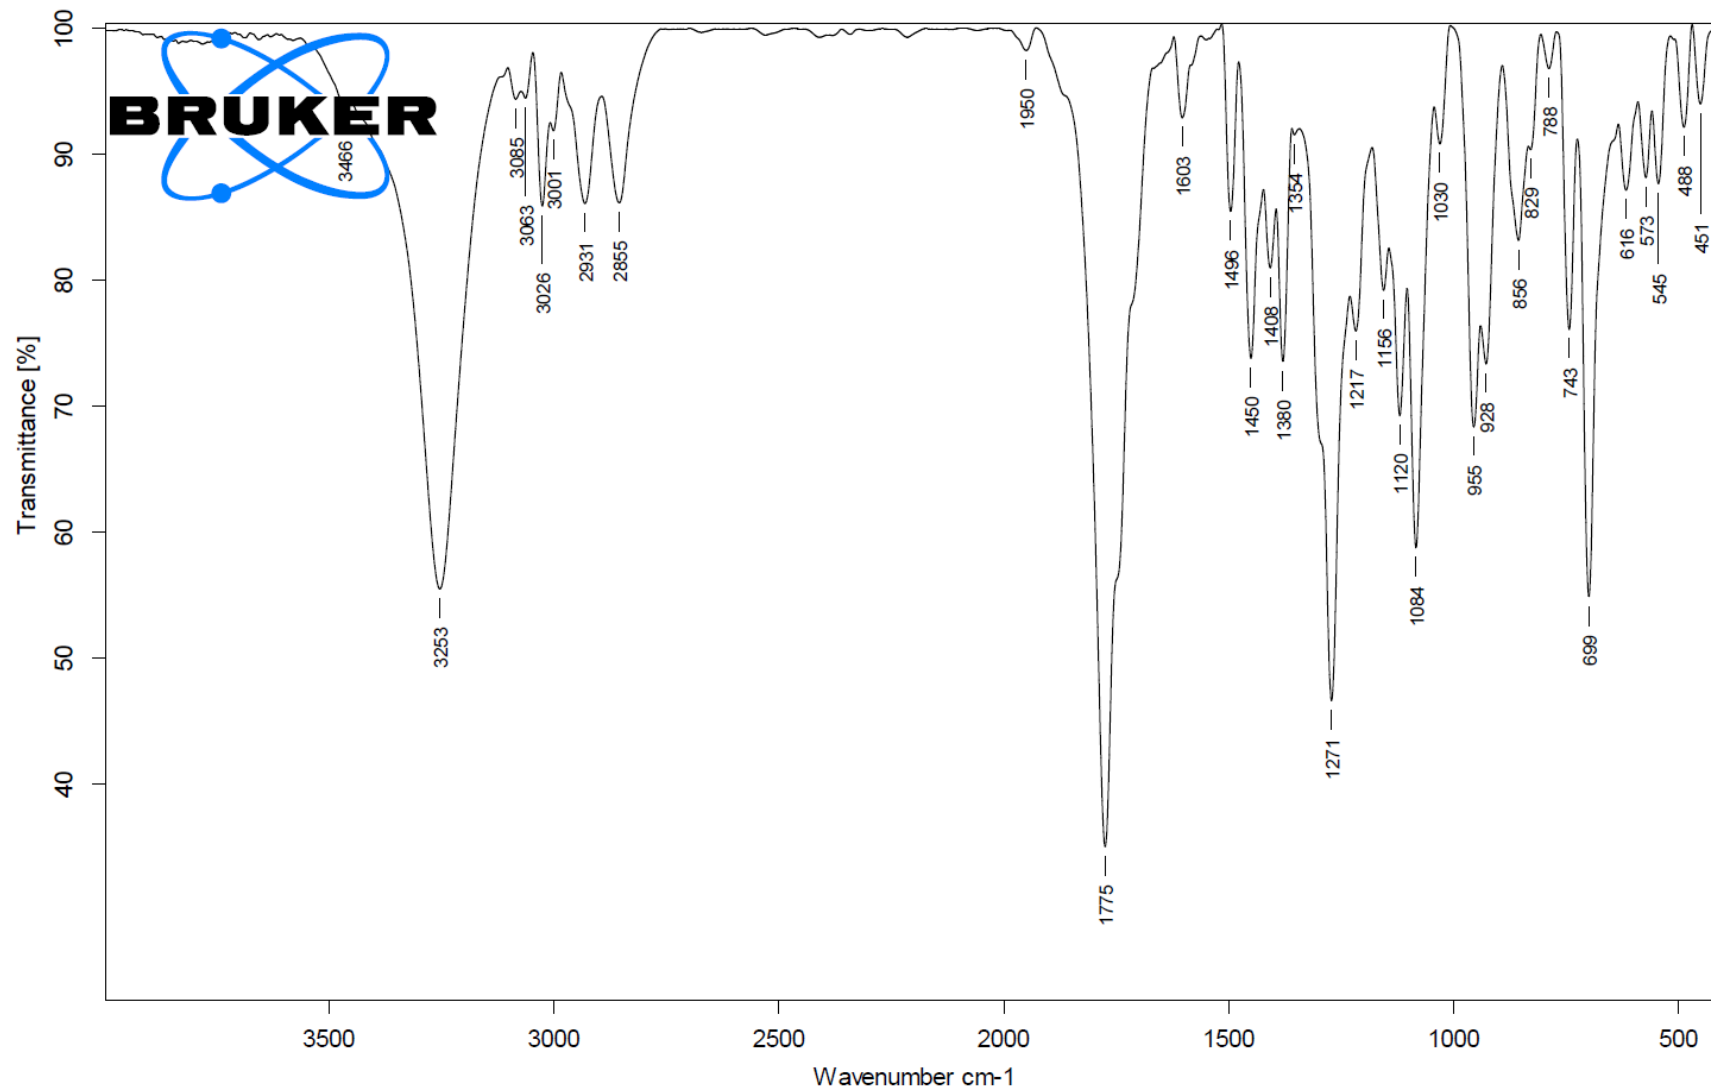

D:\ГВ\Виль ВВ2184.0

Виль ВВ2184

КВг прессовка

28.01.2020
